# Supplementary material for: Prediction and analysis of novel key genes ITGAX, LAPTM5, SERPINE1 in clear cell renal cell carcinoma through bioinformatics analysis
Source: PeerJ. 2021 Apr 20;9:e11272. doi: 10.7717/peerj.11272 (PMC8063882; doi:10.7717/peerj.11272)
Supplement: Supplemental Information 6 — A total of 9560 DEGs were screened from the GSE12606, of which, 2,230 and 7,330 genes were up- and downregulated. [file peerj-09-11272-s006.xlsx]

## Sheet: Sheet1
ID	adj.P.Val	P.Value	t	B	logFC	Gene.symbol	Gene.title
210165_at	2.37e-05	4.82e-10	-18.1	12.1533	-6.54	DNASE1	deoxyribonuclease 1
226553_at	2.37e-05	8.67e-10	-17.2	11.7537	-6.56	TMPRSS2	transmembrane protease, serine 2
214598_at	3.58e-05	2.79e-09	-15.5	10.9176	-8.09	CLDN8	claudin 8
213456_at	3.58e-05	3.28e-09	-15.3	10.7988	-7.85	SOSTDC1	sclerostin domain containing 1
1552797_s_at	5.04e-05	6.1e-09	-14.5	10.3291	-5.24	PROM2	prominin 2
236646_at	5.04e-05	6.45e-09	-14.4	10.2854	-5.86	TMEM52B	transmembrane protein 52B
218484_at	8.31e-05	1.22e-08	13.6	9.79074	5.29	NDUFA4L2	NDUFA4, mitochondrial complex associated like 2
204704_s_at	8.6e-05	1.42e-08	-13.4	9.66962	-10.1	ALDOB	aldolase, fructose-bisphosphate B
206226_at	8.88e-05	1.97e-08	-13.1	9.40496	-6.14	HRG	histidine rich glycoprotein
228462_at	8.88e-05	2.03e-08	-13	9.3795	-5.6	IRX2	iroquois homeobox 2
233183_at	8.88e-05	2.17e-08	-12.9	9.3279	-7.26	SLC4A9	solute carrier family 4 member 9
240285_at	8.88e-05	2.27e-08	-12.9	9.28875	-5.89	AQP2	aquaporin 2
211357_s_at	0.0001002	2.75e-08	-12.7	9.13356	-9.18	ALDOB	aldolase, fructose-bisphosphate B
243562_at	0.0001133	3.32e-08	-12.5	8.97904	-7.99	KNG1	kininogen 1
231275_at	0.0001146	3.64e-08	-12.4	8.90156	-5.32	LINC00982	long intergenic non-protein coding RNA 982
213967_at	0.0001146	3.77e-08	-12.3	8.87254	-7.29	RALYL	RALY RNA binding protein-like
204705_x_at	0.0001184	4.12e-08	-12.2	8.80023	-10.3	ALDOB	aldolase, fructose-bisphosphate B
202036_s_at	0.0001404	5.35e-08	-11.9	8.58056	-6.89	SFRP1	secreted frizzled related protein 1
204777_s_at	0.0001404	5.39e-08	-11.9	8.5744	-6.32	MAL	mal, T-cell differentiation protein
1558324_a_at	0.0001502	6.04e-08	-11.8	8.47828	-6.17	TMEM72	transmembrane protein 72
239593_at	0.0001682	7.26e-08	-11.6	8.32322	-5.57	TMEM213	transmembrane protein 213
210403_s_at	0.0001682	7.91e-08	-11.5	8.25038	-9	KCNJ1	potassium voltage-gated channel subfamily J member 1
206672_at	0.0001682	7.98e-08	-11.5	8.24328	-4.66	AQP2	aquaporin 2
242601_at	0.0001682	8.16e-08	-11.5	8.2234	-5.05	HEPACAM2	HEPACAM family member 2
219918_s_at	0.0001682	8.54e-08	11.4	8.18534	4.93	ASPM	abnormal spindle microtubule assembly
218507_at	0.0001682	8.63e-08	11.4	8.17625	4.27	HILPDA	hypoxia inducible lipid droplet associated
206404_at	0.0001682	8.92e-08	-11.4	8.14794	-4.92	FGF9	fibroblast growth factor 9
1554452_a_at	0.0001988	1.09e-07	11.2	7.97552	4.14	HILPDA	hypoxia inducible lipid droplet associated
235867_at	0.0002084	1.19e-07	-11.1	7.89905	-3.94	GSTM3	glutathione S-transferase mu 3
229254_at	0.0002084	1.22e-07	-11.1	7.87929	-5.47	MFSD4A	major facilitator superfamily domain containing 4A
239132_at	0.0002399	1.45e-07	-10.9	7.73059	-5.34	NOS1	nitric oxide synthase 1
224480_s_at	0.0002441	1.53e-07	-10.9	7.68469	-4.66	GPAT3	glycerol-3-phosphate acyltransferase 3
217238_s_at	0.0002441	1.56e-07	-10.8	7.66443	-10.3	ALDOB	aldolase, fructose-bisphosphate B
231058_at	0.0002716	1.79e-07	-10.7	7.54686	-7.6	FXYD4	FXYD domain containing ion transport regulator 4
210445_at	0.0002988	2.21e-07	10.5	7.36213	4.08	FABP6	fatty acid binding protein 6
242269_at	0.0002988	2.21e-07	-10.5	7.36181	-4.9	LINC00982	long intergenic non-protein coding RNA 982
217512_at	0.0002988	2.22e-07	-10.5	7.35893	-7.67	KNG1	kininogen 1
215563_s_at	0.0002988	2.24e-07	-10.5	7.34921	-4.31	MST1L	macrophage stimulating 1 like
1559280_a_at	0.0003158	2.43e-07	-10.4	7.27918	-5.53	APELA	apelin receptor early endogenous ligand
1557474_at	0.0003319	2.68e-07	-10.3	7.19084	-6.34	LOC284578	uncharacterized LOC284578
226018_at	0.0003319	2.73e-07	-10.3	7.17437	-4.52	MTURN	maturin, neural progenitor differentiation regulator homolog (Xenopus)
1556156_at	0.0003413	2.87e-07	-10.2	7.13019	-6.33	ESRRB	estrogen related receptor beta
206054_at	0.0003563	3.09e-07	-10.2	7.06624	-10.4	KNG1	kininogen 1
219737_s_at	0.0003563	3.13e-07	-10.2	7.05441	-4.9	PCDH9	protocadherin 9
217767_at	0.0003902	3.5e-07	10.1	6.95508	4.54	C3	complement component 3
1558323_at	0.0004198	3.84e-07	-9.97	6.87193	-5.81	TMEM72	transmembrane protein 72
1557146_a_at	0.0004215	3.93e-07	-9.95	6.85062	-4.3	SSTR5-AS1	SSTR5 antisense RNA 1
219735_s_at	0.0004292	4.08e-07	-9.91	6.81714	-3.94	TFCP2L1	transcription factor CP2-like 1
229024_at	0.0004302	4.37e-07	-9.85	6.75589	-3.35	RNF150	ring finger protein 150
213553_x_at	0.0004302	4.44e-07	9.83	6.74186	5.05	APOC1	apolipoprotein C1
236374_at	0.0004302	4.53e-07	-9.81	6.72321	-6.31	CTXN3	cortexin 3
215223_s_at	0.0004302	4.59e-07	9.8	6.71279	3.53	LOC100129518///SOD2	uncharacterized LOC100129518///superoxide dismutase 2, mitochondrial
229529_at	0.0004302	4.59e-07	-9.8	6.71241	-5.05	TCF21	transcription factor 21
214451_at	0.0004302	4.64e-07	-9.79	6.70202	-6.7	TFAP2B	transcription factor AP-2 beta
214978_s_at	0.0004385	4.81e-07	9.76	6.66971	5.01	PPFIA4	PTPRF interacting protein alpha 4
210402_at	0.0004671	5.25e-07	-9.68	6.59159	-8.1	KCNJ1	potassium voltage-gated channel subfamily J member 1
1556263_s_at	0.0004671	5.3e-07	-9.67	6.58345	-5.93	LOC101928818///PWRN1	uncharacterized LOC101928818///Prader-Willi region non-protein coding RNA 1
202934_at	0.0004827	5.56e-07	9.63	6.53954	4.9	HK2	hexokinase 2
242372_s_at	0.0004848	5.67e-07	-9.61	6.52138	-7.43	MFSD4A	major facilitator superfamily domain containing 4A
229168_at	0.0004895	5.82e-07	9.59	6.49867	3.55	COL23A1	collagen type XXIII alpha 1 chain
236630_at	0.000505	6.1e-07	-9.55	6.45667	-6.76	AQP2	aquaporin 2
223381_at	0.0005213	6.5e-07	9.49	6.39922	4.45	NUF2	NUF2, NDC80 kinetochore complex component
205625_s_at	0.0005213	6.58e-07	-9.48	6.38782	-8.65	CALB1	calbindin 1
211527_x_at	0.000547	7e-07	9.42	6.33119	3.48	VEGFA	vascular endothelial growth factor A
209604_s_at	0.0005488	7.13e-07	-9.41	6.31539	-3.86	GATA3	GATA binding protein 3
202554_s_at	0.0005779	7.71e-07	-9.34	6.24369	-4.64	GSTM3	glutathione S-transferase mu 3
229485_x_at	0.0005779	7.72e-07	-9.34	6.24331	-4.37	SHISA3	shisa family member 3
223704_s_at	0.0006219	8.42e-07	-9.26	6.16423	-4.67	DMRT2	doublesex and mab-3 related transcription factor 2
211276_at	0.0006616	9.08e-07	-9.2	6.09553	-6.45	TCEAL2	transcription elongation factor A like 2
202037_s_at	0.0006775	9.51e-07	-9.16	6.05336	-6.65	SFRP1	secreted frizzled related protein 1
203256_at	0.0006775	9.54e-07	-9.15	6.04993	-3.76	CDH3	cadherin 3
206840_at	0.0006812	9.72e-07	-9.14	6.03317	-4.66	AFM	afamin
218186_at	0.0006879	9.94e-07	-9.12	6.01254	-5.8	RAB25	RAB25, member RAS oncogene family
200832_s_at	0.0007125	1.04e-06	9.08	5.96888	3.97	SCD	stearoyl-CoA desaturase
219768_at	0.000718	1.1e-06	-9.03	5.91885	-5.4	VTCN1	V-set domain containing T cell activation inhibitor 1
221795_at	0.000718	1.11e-06	-9.02	5.91294	-4.66	NTRK2	neurotrophic receptor tyrosine kinase 2
205549_at	0.000718	1.11e-06	-9.02	5.90823	-5.34	PCP4	Purkinje cell protein 4
206286_s_at	0.000718	1.12e-06	-9.02	5.90731	-5.02	TDGF1P3///TDGF1	teratocarcinoma-derived growth factor 1 pseudogene 3///teratocarcinoma-derived growth factor 1
209642_at	0.000718	1.12e-06	9.02	5.90634	3.36	BUB1	BUB1 mitotic checkpoint serine/threonine kinase
220724_at	0.0007253	1.14e-06	-9	5.88642	-5.25	CWH43	cell wall biogenesis 43 C-terminal homolog
232424_at	0.0007297	1.16e-06	-8.98	5.87021	-3.65	PRDM16	PR/SET domain 16
210577_at	0.0007554	1.23e-06	-8.93	5.81763	-4.76	CASR	calcium sensing receptor
205911_at	0.0007695	1.27e-06	-8.91	5.79043	-4.22	PTH1R	parathyroid hormone 1 receptor
220705_s_at	0.0008251	1.37e-06	-8.84	5.71607	-3.51	ADAMTS7	ADAM metallopeptidase with thrombospondin type 1 motif 7
208383_s_at	0.0008449	1.42e-06	-8.81	5.68415	-6.12	PCK1	phosphoenolpyruvate carboxykinase 1
227450_at	0.0008524	1.47e-06	-8.79	5.65584	-3.62	ERP27	endoplasmic reticulum protein 27
31835_at	0.0008524	1.47e-06	-8.78	5.65433	-5.06	HRG	histidine rich glycoprotein
207047_s_at	0.0008524	1.49e-06	-8.77	5.64367	-4.62	CLCNKB///CLCNKA	chloride voltage-gated channel Kb///chloride voltage-gated channel Ka
216841_s_at	0.0008524	1.5e-06	8.77	5.6356	3.24	LOC100129518///SOD2	uncharacterized LOC100129518///superoxide dismutase 2, mitochondrial
229779_at	0.0008524	1.52e-06	-8.75	5.6207	-3.35	COL4A4	collagen type IV alpha 4 chain
1555229_a_at	0.0008524	1.53e-06	8.75	5.61783	3.99	C1S	complement component 1, s subcomponent
1553344_at	0.0009156	1.66e-06	-8.68	5.54244	-4.44	PCDH15	protocadherin related 15
227657_at	0.000971	1.78e-06	-8.63	5.47877	-3.29	RNF150	ring finger protein 150
201819_at	0.0009849	1.84e-06	8.6	5.44799	3.67	SCARB1	scavenger receptor class B member 1
205413_at	0.0009849	1.84e-06	-8.6	5.44732	-4.06	MPPED2	metallophosphoesterase domain containing 2
233712_at	0.0010044	1.91e-06	-8.57	5.41116	-4.94	LOC101928574///LOC101060181///ZNF44	uncharacterized LOC101928574///zinc finger protein ZnFP12///zinc finger protein 44
235988_at	0.001011	1.94e-06	-8.55	5.39625	-5.36	ADGRF1	adhesion G protein-coupled receptor F1
202095_s_at	0.0010114	1.96e-06	8.54	5.38711	3.43	BIRC5	baculoviral IAP repeat containing 5
214366_s_at	0.0010158	2e-06	8.53	5.36792	3.1	ALOX5	arachidonate 5-lipoxygenase
223939_at	0.0010158	2.03e-06	-8.52	5.35676	-3.83	SUCNR1	succinate receptor 1
204268_at	0.0010158	2.03e-06	-8.52	5.35671	-4.51	S100A2	S100 calcium binding protein A2
237639_at	0.0010158	2.05e-06	-8.51	5.34553	-4.08	TMEM207	transmembrane protein 207
209602_s_at	0.0010158	2.06e-06	-8.5	5.34028	-5.76	GATA3	GATA binding protein 3
204607_at	0.001022	2.09e-06	-8.49	5.32629	-6.07	HMGCS2	3-hydroxy-3-methylglutaryl-CoA synthase 2
219127_at	0.001045	2.16e-06	-8.46	5.29744	-3.62	PRR15L	proline rich 15 like
1559131_a_at	0.0010526	2.19e-06	-8.45	5.28246	-3.72	LOC101928047	uncharacterized LOC101928047
238862_at	0.0010545	2.22e-06	-8.44	5.27271	-4.02	MFSD4A	major facilitator superfamily domain containing 4A
205554_s_at	0.0010918	2.33e-06	-8.4	5.22542	-3.58	DNASE1L3	deoxyribonuclease 1 like 3
1554748_at	0.0010918	2.34e-06	-8.4	5.22436	-6.14	CLCNKB	chloride voltage-gated channel Kb
231711_at	0.0010918	2.36e-06	-8.39	5.21645	-4.07	ACPP	acid phosphatase, prostate
214053_at	0.0011023	2.4e-06	-8.38	5.19965	-5.8	ERBB4	erb-b2 receptor tyrosine kinase 4
213260_at	0.0011089	2.43e-06	-8.37	5.18634	-2.6	FOXC1	forkhead box C1
230641_at	0.0011435	2.54e-06	-8.33	5.14706	-3.87	LOC100505938	uncharacterized LOC100505938
219142_at	0.0011435	2.58e-06	-8.32	5.13188	-3.02	RASL11B	RAS like family 11 member B
1552256_a_at	0.0011435	2.59e-06	8.32	5.12887	3.89	SCARB1	scavenger receptor class B member 1
231391_at	0.0011435	2.59e-06	-8.32	5.12718	-6.98	CTXN3	cortexin 3
205985_x_at	0.0011644	2.66e-06	-8.3	5.10277	-7.13	CLCNKB	chloride voltage-gated channel Kb
205978_at	0.0011752	2.71e-06	-8.28	5.08571	-3.59	KL	klotho
229916_at	0.0011752	2.74e-06	-8.27	5.07738	-4.77	ENPP6	ectonucleotide pyrophosphatase/phosphodiesterase 6
237030_at	0.0011752	2.77e-06	-8.26	5.06476	-4.55	ACPP	acid phosphatase, prostate
204416_x_at	0.0011752	2.77e-06	8.26	5.06475	5.53	APOC1	apolipoprotein C1
219790_s_at	0.0011909	2.83e-06	-8.25	5.04514	-4.59	NPR3	natriuretic peptide receptor 3
240983_s_at	0.0011971	2.87e-06	8.24	5.03319	4.04	CARS	cysteinyl-tRNA synthetase
205357_s_at	0.0012016	2.91e-06	-8.22	5.01983	-3.51	AGTR1	angiotensin II receptor type 1
219249_s_at	0.0012016	2.92e-06	8.22	5.01548	3.97	FKBP10	FK506 binding protein 10
205983_at	0.0012352	3.03e-06	-8.19	4.98271	-5.83	DPEP1	dipeptidase 1 (renal)
219840_s_at	0.0012695	3.13e-06	-8.16	4.95014	-4.05	TCL6	T-cell leukemia/lymphoma 6 (non-protein coding)
1554941_at	0.0012739	3.18e-06	-8.15	4.93689	-3.6	KLHL14	kelch like family member 14
207110_at	0.0012739	3.24e-06	-8.14	4.92014	-3.73	LOC100996843///KCNJ18///KCNJ12	ATP-sensitive inward rectifier potassium channel 12-like///potassium voltage-gated channel subfamily J member 18///potassium voltage-gated channel subfamily J member 12
1552532_a_at	0.0012739	3.24e-06	-8.14	4.91955	-5.55	ATP6V1C2	ATPase H+ transporting V1 subunit C2
236225_at	0.0012994	3.33e-06	-8.12	4.8943	-6.02	GGT6	gamma-glutamyltransferase 6
230472_at	0.0013077	3.37e-06	-8.11	4.88171	-5.08	IRX1	iroquois homeobox 1
221588_x_at	0.0013318	3.47e-06	-8.08	4.85401	-4.1	ALDH6A1	aldehyde dehydrogenase 6 family member A1
228581_at	0.0013318	3.48e-06	-8.08	4.85141	-6.22	KCNJ10	potassium voltage-gated channel subfamily J member 10
220310_at	0.0013325	3.51e-06	-8.08	4.84433	-4.05	TUBAL3	tubulin alpha like 3
206089_at	0.0013407	3.56e-06	-8.06	4.83212	-5.85	NELL1	neural EGFL like 1
206259_at	0.0013632	3.64e-06	-8.05	4.81005	-4.35	PROC	protein C, inactivator of coagulation factors Va and VIIIa
238755_at	0.0013681	3.68e-06	-8.04	4.8003	-3	RASSF10	Ras association domain family member 10
218888_s_at	0.0013724	3.71e-06	8.03	4.79101	3.07	NETO2	neuropilin and tolloid like 2
211538_s_at	0.0013747	3.75e-06	-8.02	4.78306	-3.9	HSPA2	heat shock protein family A (Hsp70) member 2
202912_at	0.0013997	3.85e-06	8	4.75758	2.77	ADM	adrenomedullin
233863_at	0.0013997	3.87e-06	-8	4.75366	-4.01	CASZ1	castor zinc finger 1
208747_s_at	0.0014139	3.93e-06	7.99	4.73794	3.14	C1S	complement component 1, s subcomponent
210052_s_at	0.0014483	4.06e-06	7.96	4.70691	3.25	TPX2	TPX2, microtubule nucleation factor
225458_at	0.0014483	4.08e-06	-7.96	4.70311	-3.3	PP7080	uncharacterized LOC25845
236893_at	0.0014638	4.15e-06	-7.94	4.68697	-3.82	HOXB-AS3	HOXB cluster antisense RNA 3
204743_at	0.0014646	4.2e-06	-7.93	4.67513	-2.71	TAGLN3	transgelin 3
221009_s_at	0.0014646	4.21e-06	7.93	4.67445	5.04	ANGPTL4	angiopoietin like 4
236360_at	0.0014786	4.3e-06	-7.92	4.65423	-5.28	LINC00982	long intergenic non-protein coding RNA 982
230565_at	0.0014786	4.3e-06	-7.92	4.65355	-4.38	ATP6V1G3	ATPase H+ transporting V1 subunit G3
206681_x_at	0.0015375	4.51e-06	-7.88	4.60807	-5.7	GP2	glycoprotein 2
203824_at	0.0015375	4.53e-06	-7.88	4.60504	-5.69	TSPAN8	tetraspanin 8
216705_s_at	0.0016024	4.75e-06	7.84	4.56027	3.78	ADA	adenosine deaminase
222608_s_at	0.0016096	4.81e-06	7.83	4.54872	2.99	ANLN	anillin actin binding protein
223333_s_at	0.0016096	4.85e-06	7.82	4.53994	6.32	ANGPTL4	angiopoietin like 4
1554804_a_at	0.0016096	4.86e-06	-7.82	4.53873	-3.16	CLDN19	claudin 19
226492_at	0.0016169	4.91e-06	-7.81	4.5288	-4	SEMA6D	semaphorin 6D
237737_at	0.0016324	4.99e-06	7.8	4.51412	3.45	LOC101927345///LOC101060632///LOC101059949///ANKRD20A12P	putative ankyrin repeat domain-containing protein 20A12 pseudogene///uncharacterized gene LOC101060632///putative ankyrin repeat domain-containing protein 20A12 pseudogene///ankyrin repeat domain 20 family member A12, pseudogene
226961_at	0.0016332	5.02e-06	-7.8	4.50801	-4.16	PRR15	proline rich 15
206716_at	0.0016572	5.12e-06	-7.78	4.48868	-10.7	UMOD	uromodulin
208010_s_at	0.0016763	5.21e-06	7.77	4.47226	3.47	PTPN22	protein tyrosine phosphatase, non-receptor type 22
206254_at	0.0016778	5.25e-06	-7.76	4.46476	-5.07	EGF	epidermal growth factor
1554524_a_at	0.0016778	5.28e-06	-7.76	4.46037	-4.54	OLFM3	olfactomedin 3
219789_at	0.0016846	5.33e-06	-7.75	4.45107	-3.82	NPR3	natriuretic peptide receptor 3
220999_s_at	0.0017346	5.52e-06	-7.72	4.41802	-3.08	CYFIP2	cytoplasmic FMR1 interacting protein 2
221232_s_at	0.0017447	5.58e-06	-7.71	4.4071	-3.92	ANKRD2	ankyrin repeat domain 2
212510_at	0.0017573	5.66e-06	-7.7	4.39492	-3.17	GPD1L	glycerol-3-phosphate dehydrogenase 1-like
240183_at	0.0017701	5.81e-06	-7.68	4.37048	-7.16	TMEM213	transmembrane protein 213
216599_x_at	0.0017701	5.81e-06	-7.68	4.36969	-6.16	SLC22A6	solute carrier family 22 member 6
228377_at	0.0017701	5.82e-06	-7.68	4.36864	-3.98	KLHL14	kelch like family member 14
202503_s_at	0.0017701	5.85e-06	7.68	4.3634	3.15	KIAA0101	KIAA0101
204457_s_at	0.0017701	6e-06	-7.66	4.33979	-3.22	GAS1	growth arrest specific 1
225645_at	0.0017701	6.02e-06	-7.66	4.33667	-5.12	EHF	ETS homologous factor
1570279_at	0.0017701	6.02e-06	7.66	4.33613	3.51	ABCA1	ATP binding cassette subfamily A member 1
206410_at	0.0017701	6.05e-06	-7.65	4.33076	-3.88	NR0B2	nuclear receptor subfamily 0 group B member 2
219888_at	0.0018157	6.24e-06	7.63	4.30161	4.15	SPAG4	sperm associated antigen 4
236038_at	0.0018265	6.31e-06	-7.62	4.29096	-4.19	RNF150	ring finger protein 150
231156_at	0.0018565	6.45e-06	-7.6	4.27053	-3.82	HAO2	hydroxyacid oxidase 2
208937_s_at	0.0018608	6.5e-06	-7.6	4.26341	-3.6	ID1	inhibitor of DNA binding 1, HLH protein
206558_at	0.0018802	6.6e-06	-7.59	4.24864	-3.46	SIM2	single-minded family bHLH transcription factor 2
207174_at	0.0018805	6.64e-06	-7.58	4.24356	-6.32	GPC5	glypican 5
202659_at	0.001886	6.71e-06	7.58	4.23375	2.38	PSMB10	proteasome subunit beta 10
232748_at	0.001886	6.73e-06	-7.57	4.2306	-3.35	PAPPA	pappalysin 1
209933_s_at	0.001886	6.76e-06	7.57	4.22614	2.9	CD300A	CD300a molecule
213332_at	0.0019508	7.06e-06	-7.54	4.18449	-3.36	PAPPA2	pappalysin 2
238287_at	0.0019566	7.14e-06	-7.53	4.17438	-6.46	SLC7A13	solute carrier family 7 member 13
239805_at	0.0019566	7.17e-06	-7.52	4.16994	-5.57	SLC13A2	solute carrier family 13 member 2
218755_at	0.0019566	7.19e-06	7.52	4.16739	3.34	KIF20A	kinesin family member 20A
227238_at	0.0019616	7.25e-06	-7.52	4.16031	-7.67	MUC15	mucin 15, cell surface associated
228978_at	0.001967	7.3e-06	-7.51	4.153	-3.41	TBX2-AS1	TBX2 antisense RNA 1
204424_s_at	0.0019939	7.44e-06	-7.5	4.13511	-5.14	LMO3	LIM domain only 3
205626_s_at	0.0019939	7.48e-06	-7.49	4.13078	-8.09	CALB1	calbindin 1
215446_s_at	0.0020468	7.77e-06	7.46	4.09409	4.84	LOX	lysyl oxidase
206484_s_at	0.0020468	7.79e-06	-7.46	4.09213	-6.16	XPNPEP2	X-prolyl aminopeptidase 2
204290_s_at	0.0020636	7.93e-06	-7.45	4.07526	-3.88	ALDH6A1	aldehyde dehydrogenase 6 family member A1
229177_at	0.0020636	7.95e-06	-7.45	4.07213	-5.09	C16orf89	chromosome 16 open reading frame 89
219725_at	0.0020636	7.96e-06	7.45	4.07073	4.27	TREM2	triggering receptor expressed on myeloid cells 2
215692_s_at	0.0020799	8.06e-06	-7.44	4.05877	-4.74	MPPED2	metallophosphoesterase domain containing 2
207091_at	0.0020997	8.18e-06	7.43	4.04528	3.66	P2RX7	purinergic receptor P2X 7
218952_at	0.0021275	8.33e-06	-7.41	4.02834	-5.45	PCSK1N	proprotein convertase subtilisin/kexin type 1 inhibitor
213317_at	0.0021338	8.42e-06	-7.41	4.0182	-5.53	CLIC5	chloride intracellular channel 5
229667_s_at	0.0021338	8.43e-06	-7.4	4.01668	-2.85	HOXB8	homeobox B8
235515_at	0.0021608	8.58e-06	-7.39	4.00033	-4.4	SYNE4	spectrin repeat containing nuclear envelope family member 4
229975_at	0.0021608	8.62e-06	-7.39	3.99597	-4.91	BMPR1B	bone morphogenetic protein receptor type 1B
226274_at	0.0021726	8.7e-06	-7.38	3.98643	-2.81	CLCN5	chloride voltage-gated channel 5
220484_at	0.0021869	8.8e-06	-7.37	3.97583	-3.99	MCOLN3	mucolipin 3
236641_at	0.0022119	8.94e-06	7.36	3.96071	3.69	KIF14	kinesin family member 14
222073_at	0.0022215	9.02e-06	-7.35	3.95227	-3.52	COL4A3	collagen type IV alpha 3 chain
242660_at	0.0022479	9.17e-06	-7.34	3.93673	-3.85	MALRD1	MAM and LDL receptor class A domain containing 1
201695_s_at	0.0022538	9.27e-06	-7.33	3.92574	-2.44	PNP	purine nucleoside phosphorylase
205777_at	0.0022573	9.34e-06	-7.33	3.919	-4.09	DUSP9	dual specificity phosphatase 9
227202_at	0.0022573	9.37e-06	-7.33	3.91584	-4.61	CNTN1	contactin 1
209763_at	0.0022781	9.53e-06	-7.31	3.90018	-3.24	CHRDL1	chordin like 1
221530_s_at	0.0022781	9.54e-06	7.31	3.89875	3.97	BHLHE41	basic helix-loop-helix family member e41
209773_s_at	0.0023319	9.84e-06	7.29	3.86892	3.19	RRM2	ribonucleotide reductase regulatory subunit M2
223582_at	0.0023319	9.85e-06	-7.29	3.86821	-3.15	ADGRV1	adhesion G protein-coupled receptor V1
218963_s_at	0.0023335	9.9e-06	-7.28	3.86343	-2.87	KRT23	keratin 23
228320_x_at	0.0023629	1.01e-05	-7.27	3.84738	-2.76	BICDL1	BICD family like cargo adaptor 1
223893_at	0.0023987	1.03e-05	-7.25	3.82396	-4.66	ENAM	enamelin
1553989_a_at	0.0023987	1.03e-05	-7.25	3.82195	-3.7	ATP6V1C2	ATPase H+ transporting V1 subunit C2
1559992_a_at	0.0023987	1.04e-05	-7.25	3.82085	-5.61	LINC00645	long intergenic non-protein coding RNA 645
205694_at	0.0024118	1.05e-05	-7.24	3.80934	-6.34	TYRP1	tyrosinase related protein 1
225457_s_at	0.0024118	1.05e-05	-7.24	3.80762	-3.36	OLMALINC///PP7080	oligodendrocyte maturation-associated long intergenic non-coding RNA///uncharacterized LOC25845
219232_s_at	0.0024156	1.06e-05	7.23	3.79811	3.03	EGLN3	egl-9 family hypoxia inducible factor 3
201313_at	0.002461	1.09e-05	7.21	3.76904	3.59	ENO2	enolase 2
1565602_at	0.002461	1.09e-05	-7.21	3.76848	-4.49	PCDH9	protocadherin 9
1555800_at	0.0024814	1.11e-05	-7.2	3.75569	-6.38	ZNF385B	zinc finger protein 385B
239270_at	0.0024814	1.11e-05	-7.2	3.75278	-4.48	PLCXD3	phosphatidylinositol specific phospholipase C X domain containing 3
1552535_at	0.0024937	1.12e-05	-7.19	3.74203	-3.99	CLDN19	claudin 19
226661_at	0.0024937	1.13e-05	7.19	3.7403	3.88	CDCA2	cell division cycle associated 2
220625_s_at	0.0025035	1.14e-05	-7.18	3.72923	-4.02	ELF5	E74 like ETS transcription factor 5
226933_s_at	0.0025035	1.14e-05	-7.18	3.72884	-3.28	ID4	inhibitor of DNA binding 4, HLH protein
213349_at	0.0025069	1.15e-05	7.18	3.7237	2.99	TMCC1	transmembrane and coiled-coil domain family 1
244119_at	0.0026096	1.2e-05	-7.14	3.67773	-4.87	LINC00551	long intergenic non-protein coding RNA 551
240033_at	0.002661	1.24e-05	-7.12	3.65015	-5.02	PLG	plasminogen
220424_at	0.002661	1.25e-05	-7.12	3.644	-7.16	NPHS2	NPHS2, podocin
208016_s_at	0.0026747	1.26e-05	-7.11	3.63537	-4.22	AGTR1	angiotensin II receptor type 1
208473_s_at	0.0027004	1.27e-05	-7.1	3.62251	-5.09	GP2	glycoprotein 2
223550_s_at	0.0027102	1.28e-05	-7.1	3.61535	-3.93	CA10	carbonic anhydrase 10
239006_at	0.0027127	1.29e-05	-7.09	3.61076	-4.57	SLC26A7	solute carrier family 26 member 7
236523_at	0.0027991	1.34e-05	-7.06	3.57321	-5.8	LOC285556	uncharacterized LOC285556
201291_s_at	0.0027991	1.35e-05	7.06	3.56731	3.58	TOP2A	topoisomerase (DNA) II alpha
1563022_at	0.0027991	1.36e-05	-7.05	3.56022	-3.09	CCDC160	coiled-coil domain containing 160
1552367_a_at	0.0027991	1.36e-05	-7.05	3.55896	-3.38	SCIN	scinderin
207414_s_at	0.0027991	1.36e-05	7.05	3.558	3.34	LOC100507472///PCSK6	uncharacterized LOC100507472///proprotein convertase subtilisin/kexin type 6
209496_at	0.0027991	1.37e-05	7.05	3.55317	2.63	RARRES2	retinoic acid receptor responder 2
222938_x_at	0.0027991	1.37e-05	7.05	3.55174	3.42	ENPP3	ectonucleotide pyrophosphatase/phosphodiesterase 3
209612_s_at	0.0028054	1.38e-05	-7.04	3.54602	-4.9	ADH1B	alcohol dehydrogenase 1B (class I), beta polypeptide
202345_s_at	0.0028302	1.4e-05	7.03	3.53258	2.9	FABP5	fatty acid binding protein 5
218542_at	0.0028302	1.4e-05	7.03	3.53048	3.72	CEP55	centrosomal protein 55
204393_s_at	0.0028591	1.42e-05	-7.02	3.51724	-5.6	ACPP	acid phosphatase, prostate
223610_at	0.002861	1.43e-05	7.02	3.5131	3.43	SEMA5B	semaphorin 5B
207899_at	0.0028625	1.43e-05	-7.02	3.50908	-3.24	GIP	gastric inhibitory polypeptide
220281_at	0.0028872	1.45e-05	-7.01	3.49735	-9.26	SLC12A1	solute carrier family 12 member 1
1558290_a_at	0.0029291	1.48e-05	6.99	3.48006	2.83	MIR1204///PVT1	microRNA 1204///Pvt1 oncogene (non-protein coding)
238657_at	0.0029301	1.49e-05	6.99	3.47431	2.8	UBXN10	UBX domain protein 10
1553153_at	0.0029301	1.49e-05	-6.99	3.47281	-3.93	ATP6V0D2	ATPase H+ transporting V0 subunit d2
228739_at	0.0029827	1.52e-05	-6.97	3.4523	-4.15	CYS1	cystin 1
214680_at	0.0029836	1.53e-05	-6.97	3.44617	-3.43	NTRK2	neurotrophic receptor tyrosine kinase 2
212771_at	0.0029836	1.53e-05	-6.97	3.44517	-3.29	FAM171A1	family with sequence similarity 171 member A1
204584_at	0.0030087	1.56e-05	-6.96	3.43036	-3.62	L1CAM	L1 cell adhesion molecule
212448_at	0.0030087	1.56e-05	-6.96	3.43032	-2.41	NEDD4L	neural precursor cell expressed, developmentally down-regulated 4-like, E3 ubiquitin protein ligase
241386_at	0.0030449	1.58e-05	6.95	3.41547	3.26	LOC100506691	uncharacterized LOC100506691
230138_at	0.0031012	1.62e-05	-6.93	3.39318	-3.29	NCS1	neuronal calcium sensor 1
231068_at	0.0031012	1.62e-05	-6.93	3.39116	-5.21	SLC47A2	solute carrier family 47 member 2
207567_at	0.0031066	1.64e-05	-6.92	3.38279	-4.41	SLC13A2	solute carrier family 13 member 2
223006_s_at	0.0031066	1.64e-05	-6.92	3.38279	-2.13	TMEM245	transmembrane protein 245
221896_s_at	0.0031114	1.65e-05	-6.92	3.37482	-2.3	HIGD1A	HIG1 hypoxia inducible domain family member 1A
230615_at	0.0031114	1.65e-05	-6.91	3.37262	-2.6	DUOXA2	dual oxidase maturation factor 2
227172_at	0.0031114	1.66e-05	-6.91	3.37137	-2.29	TMEM116	transmembrane protein 116
1560788_at	0.003115	1.67e-05	-6.91	3.36574	-3.26	MYO3B	myosin IIIB
204298_s_at	0.003115	1.67e-05	6.91	3.36368	4.45	LOX	lysyl oxidase
238019_at	0.0031894	1.72e-05	-6.88	3.33273	-2.87	PLIN5	perilipin 5
212110_at	0.0031894	1.73e-05	6.88	3.33121	2.6	SLC39A14	solute carrier family 39 member 14
221030_s_at	0.0032755	1.79e-05	-6.86	3.29915	-2.76	ARHGAP24	Rho GTPase activating protein 24
235316_at	0.0032884	1.8e-05	-6.85	3.29036	-3.59	NAT8L	N-acetyltransferase 8 like
223823_at	0.0032884	1.8e-05	-6.85	3.28895	-3.09	KCNMB2	potassium calcium-activated channel subfamily M regulatory beta subunit 2
207359_at	0.0033008	1.82e-05	-6.85	3.28214	-3.17	CAMKK2	calcium/calmodulin dependent protein kinase kinase 2
203470_s_at	0.0033012	1.82e-05	6.84	3.27882	3.11	PLEK	pleckstrin
205257_s_at	0.0033031	1.83e-05	-6.84	3.2751	-2.73	AMPH	amphiphysin
233604_at	0.0033415	1.86e-05	-6.83	3.26082	-4.42	FLJ22763	uncharacterized LOC401081
229151_at	0.0034035	1.9e-05	-6.82	3.23997	-5.39	SLC14A1	solute carrier family 14 member 1 (Kidd blood group)
204281_at	0.0034918	1.95e-05	6.8	3.2119	2.61	TEAD4	TEA domain transcription factor 4
220332_at	0.0034918	1.96e-05	-6.79	3.20894	-3.67	CLDN16	claudin 16
1553319_at	0.0034918	1.97e-05	-6.79	3.20594	-4.29	OXGR1	oxoglutarate receptor 1
1554593_s_at	0.0035338	2e-05	-6.78	3.1906	-4.02	SLC1A6	solute carrier family 1 member 6
242871_at	0.0035338	2e-05	-6.78	3.1882	-2.38	PAQR5	progestin and adipoQ receptor family member 5
203857_s_at	0.0035858	2.04e-05	6.77	3.17103	2.63	MIR7110///PDIA5	microRNA 7110///protein disulfide isomerase family A member 5
202238_s_at	0.0035894	2.05e-05	6.76	3.16689	4.91	LOC101928916///NNMT	uncharacterized LOC101928916///nicotinamide N-methyltransferase
220197_at	0.0035894	2.05e-05	-6.76	3.1639	-6.19	ATP6V0A4	ATPase H+ transporting V0 subunit a4
1552365_at	0.0036105	2.07e-05	-6.75	3.15518	-3.02	SCIN	scinderin
224064_s_at	0.0036138	2.08e-05	6.75	3.15041	2.73	DHDDS	dehydrodolichyl diphosphate synthase subunit
239457_at	0.0036138	2.09e-05	6.75	3.1464	4.38	ATP8B3	ATPase phospholipid transporting 8B3
240144_at	0.0036138	2.1e-05	-6.75	3.14352	-2.44	DNASE1	deoxyribonuclease 1
231195_at	0.0036138	2.1e-05	-6.75	3.14213	-2.95	KLRG2	killer cell lectin like receptor G2
1564485_at	0.0036269	2.12e-05	6.74	3.1356	4.44	LINC00887	long intergenic non-protein coding RNA 887
244741_s_at	0.0036313	2.14e-05	-6.73	3.12376	-3.13	ZNF667-AS1	ZNF667 antisense RNA 1 (head to head)
217028_at	0.0036313	2.15e-05	6.73	3.1216	2.68	CXCR4	C-X-C motif chemokine receptor 4
224901_at	0.0036313	2.15e-05	-6.73	3.12137	-4.28	SCD5	stearoyl-CoA desaturase 5
213651_at	0.0036313	2.15e-05	-6.73	3.12042	-3.52	INPP5J	inositol polyphosphate-5-phosphatase J
231334_at	0.0036313	2.15e-05	-6.73	3.11948	-3.18	LOC101929480	uncharacterized LOC101929480
206457_s_at	0.0036316	2.16e-05	-6.73	3.11642	-5.42	DIO1	deiodinase, iodothyronine type I
211689_s_at	0.0036949	2.21e-05	-6.71	3.09386	-4.83	TMPRSS2	transmembrane protease, serine 2
203453_at	0.0036997	2.22e-05	-6.71	3.08818	-6.8	SCNN1A	sodium channel epithelial 1 alpha subunit
240628_at	0.0036997	2.23e-05	-6.7	3.08408	-2.69	LOC105369507	uncharacterized LOC105369507
223623_at	0.0036997	2.23e-05	-6.7	3.08382	-5.83	C2orf40	chromosome 2 open reading frame 40
1555801_s_at	0.0037097	2.25e-05	-6.7	3.0783	-4.63	ZNF385B	zinc finger protein 385B
220510_at	0.0037103	2.26e-05	-6.7	3.07428	-4.1	RHBG	Rh family B glycoprotein (gene/pseudogene)
1555120_at	0.0037103	2.26e-05	6.69	3.07232	3.63	CD96	CD96 molecule
218024_at	0.0037198	2.28e-05	-6.69	3.06538	-2.81	MPC1	mitochondrial pyruvate carrier 1
237108_x_at	0.0037198	2.28e-05	-6.69	3.06409	-4.05	LINC00982	long intergenic non-protein coding RNA 982
207444_at	0.0037622	2.32e-05	-6.68	3.04548	-4.3	SLC22A13	solute carrier family 22 member 13
203304_at	0.0037622	2.34e-05	-6.67	3.04025	-2.64	BAMBI	BMP and activin membrane bound inhibitor
207958_at	0.0037622	2.34e-05	-6.67	3.0389	-3.55	UGT2A2///UGT2A1	UDP glucuronosyltransferase family 2 member A2///UDP glucuronosyltransferase family 2 member A1 complex locus
229740_at	0.0037677	2.35e-05	-6.67	3.03465	-4.82	SMIM5	small integral membrane protein 5
229778_at	0.0037845	2.37e-05	-6.66	3.02752	-4.74	SPX	spexin hormone
209977_at	0.0037862	2.38e-05	-6.66	3.02429	-6.87	PLG	plasminogen
211458_s_at	0.0037913	2.39e-05	-6.66	3.02003	-2.34	GABARAPL3///GABARAPL1	GABA type A receptor associated protein like 3 pseudogene///GABA type A receptor associated protein like 1
204187_at	0.0037913	2.39e-05	-6.65	3.01739	-2.6	GMPR	guanosine monophosphate reductase
200654_at	0.0037957	2.4e-05	6.65	3.01348	2.84	P4HB	prolyl 4-hydroxylase subunit beta
232694_at	0.0038126	2.42e-05	6.65	3.00513	3.75	ZNF395	zinc finger protein 395
230822_at	0.0038126	2.43e-05	-6.64	3.00355	-5.15	TMEM61	transmembrane protein 61
205328_at	0.0038126	2.43e-05	-6.64	3.00085	-2.63	CLDN10	claudin 10
1554300_a_at	0.0038245	2.45e-05	-6.64	2.9951	-3.67	SVOPL	SVOP like
229635_at	0.0038366	2.47e-05	6.63	2.98522	2.38	LINC01094	long intergenic non-protein coding RNA 1094
227174_at	0.0038366	2.48e-05	-6.63	2.98381	-3.1	WDR72	WD repeat domain 72
233155_at	0.0038933	2.53e-05	-6.62	2.96292	-3.48	UPP2	uridine phosphorylase 2
213599_at	0.0038933	2.53e-05	6.62	2.96232	3.56	OIP5	Opa interacting protein 5
235048_at	0.0038933	2.54e-05	-6.61	2.96149	-4.82	FAM169A	family with sequence similarity 169 member A
202409_at	0.0038938	2.55e-05	-6.61	2.95705	-3.21	INS-IGF2///IGF2	INS-IGF2 readthrough///insulin like growth factor 2
207367_at	0.0038938	2.55e-05	-6.61	2.95596	-2.39	ATP12A	ATPase H+/K+ transporting non-gastric alpha2 subunit
229302_at	0.003897	2.56e-05	-6.61	2.95248	-3.63	TMEM178A	transmembrane protein 178A
202035_s_at	0.003964	2.61e-05	-6.59	2.93334	-3.9	SFRP1	secreted frizzled related protein 1
239656_at	0.0040487	2.67e-05	-6.58	2.91024	-3.42	LHFPL3-AS2	LHFPL3 antisense RNA 2
222847_s_at	0.0040576	2.69e-05	6.57	2.90279	3.62	EGLN3	egl-9 family hypoxia inducible factor 3
227195_at	0.0041285	2.75e-05	-6.56	2.8834	-2.68	ZNF503	zinc finger protein 503
231021_at	0.0041606	2.78e-05	-6.55	2.87327	-5.67	SLC6A19	solute carrier family 6 member 19
202887_s_at	0.0042166	2.82e-05	6.54	2.8577	2.32	DDIT4	DNA damage inducible transcript 4
233498_at	0.0042686	2.87e-05	-6.53	2.84322	-3.39	ERBB4	erb-b2 receptor tyrosine kinase 4
219634_at	0.0042962	2.9e-05	6.52	2.83174	3.45	CHST11	carbohydrate (chondroitin 4) sulfotransferase 11
223007_s_at	0.0043059	2.92e-05	-6.52	2.82579	-2	TMEM245	transmembrane protein 245
1553151_at	0.0043059	2.92e-05	-6.52	2.82435	-3.54	ATP6V0D2	ATPase H+ transporting V0 subunit d2
220554_at	0.0043928	2.99e-05	-6.5	2.80243	-4.24	SLC22A7	solute carrier family 22 member 7
204199_at	0.0044346	3.03e-05	-6.49	2.79068	-3.15	RALGPS1	Ral GEF with PH domain and SH3 binding motif 1
221589_s_at	0.0044583	3.05e-05	-6.49	2.78292	-2.98	ALDH6A1	aldehyde dehydrogenase 6 family member A1
1563874_at	0.004495	3.09e-05	-6.48	2.76891	-2.29	WDR72	WD repeat domain 72
205316_at	0.004495	3.09e-05	-6.48	2.76869	-2.72	SLC15A2	solute carrier family 15 member 2
238689_at	0.004495	3.1e-05	-6.48	2.76726	-3.67	ADGRF1	adhesion G protein-coupled receptor F1
205046_at	0.0045222	3.13e-05	6.47	2.75887	3.07	CENPE	centromere protein E
236044_at	0.004539	3.15e-05	-6.47	2.75133	-3.63	PLPP4	phospholipid phosphatase 4
210095_s_at	0.004539	3.16e-05	6.46	2.7494	2.51	IGFBP3	insulin like growth factor binding protein 3
222646_s_at	0.004539	3.16e-05	6.46	2.74764	3.05	ERO1A	endoplasmic reticulum oxidoreductase 1 alpha
211475_s_at	0.0045729	3.19e-05	-6.46	2.73791	-2.24	BAG1	BCL2 associated athanogene 1
209459_s_at	0.0045754	3.21e-05	-6.45	2.73485	-2.92	ABAT	4-aminobutyrate aminotransferase
231632_at	0.0045899	3.23e-05	-6.45	2.72712	-3.05	ERICH4	glutamate rich 4
236407_at	0.0045899	3.23e-05	-6.45	2.72675	-5.02	KCNE1	potassium voltage-gated channel subfamily E regulatory subunit 1
217984_at	0.0046893	3.32e-05	6.43	2.70221	2.66	RNASET2	ribonuclease T2
231376_at	0.0046893	3.32e-05	-6.43	2.70099	-4.62	UPP2	uridine phosphorylase 2
201906_s_at	0.0047073	3.35e-05	-6.42	2.6923	-2.15	CTDSPL	CTD small phosphatase like
210992_x_at	0.0047124	3.36e-05	6.42	2.68876	3.28	FCGR2C	Fc fragment of IgG receptor IIc (gene/pseudogene)
209978_s_at	0.0047504	3.4e-05	-6.41	2.6771	-7.19	PLG///LPA	plasminogen///lipoprotein(a)
227645_at	0.0047504	3.41e-05	6.41	2.67603	3.26	PIK3R5	phosphoinositide-3-kinase regulatory subunit 5
202786_at	0.0047628	3.42e-05	6.41	2.67104	3.26	STK39	serine/threonine kinase 39
226145_s_at	0.0047633	3.43e-05	-6.41	2.66848	-3.73	FRAS1	Fraser extracellular matrix complex subunit 1
206721_at	0.0047721	3.45e-05	-6.4	2.66424	-2.97	CCDC181	coiled-coil domain containing 181
206048_at	0.0047928	3.47e-05	-6.4	2.6576	-4.43	OVOL2	ovo like zinc finger 2
235649_at	0.0048185	3.52e-05	-6.39	2.64465	-3.07	ADAMTS8	ADAM metallopeptidase with thrombospondin type 1 motif 8
1554308_s_at	0.0048185	3.52e-05	-6.39	2.64461	-2.93	GABRA2	gamma-aminobutyric acid type A receptor alpha2 subunit
201301_s_at	0.0048185	3.53e-05	6.39	2.64274	2.02	ANXA4	annexin A4
203819_s_at	0.0048185	3.53e-05	6.39	2.64268	4.4	IGF2BP3	insulin like growth factor 2 mRNA binding protein 3
227971_at	0.0048484	3.57e-05	-6.38	2.63049	-6.2	NRK	Nik related kinase
217983_s_at	0.0048484	3.57e-05	6.38	2.63035	2.78	RNASET2	ribonuclease T2
1558689_a_at	0.0048484	3.57e-05	-6.38	2.62946	-3.25	STX17-AS1	STX17 antisense RNA 1
200656_s_at	0.0049059	3.63e-05	6.37	2.61457	2.28	P4HB	prolyl 4-hydroxylase subunit beta
220161_s_at	0.0049059	3.63e-05	-6.37	2.61324	-2.9	EPB41L4B	erythrocyte membrane protein band 4.1 like 4B
239506_s_at	0.0049645	3.69e-05	-6.36	2.59935	-2.39	LINC00608	long intergenic non-protein coding RNA 608
221521_s_at	0.0050574	3.77e-05	6.34	2.57662	2.48	GINS2	GINS complex subunit 2
204146_at	0.0050647	3.79e-05	6.34	2.57284	2.5	RAD51AP1	RAD51 associated protein 1
206686_at	0.0050784	3.81e-05	6.34	2.56787	2.47	PDK1	pyruvate dehydrogenase kinase 1
221590_s_at	0.0051349	3.88e-05	-6.32	2.54987	-3.45	ALDH6A1	aldehyde dehydrogenase 6 family member A1
203980_at	0.0051349	3.89e-05	-6.32	2.54643	-3.84	FABP4	fatty acid binding protein 4
210179_at	0.0051349	3.9e-05	-6.32	2.54457	-4.33	KCNJ13	potassium voltage-gated channel subfamily J member 13
239675_at	0.0051349	3.9e-05	6.32	2.54417	3.36	LINC00900	long intergenic non-protein coding RNA 900
1553394_a_at	0.0051349	3.9e-05	-6.32	2.54391	-5.16	TFAP2B	transcription factor AP-2 beta
209122_at	0.0051349	3.91e-05	6.32	2.54114	2.47	PLIN2	perilipin 2
206588_at	0.0051349	3.92e-05	-6.32	2.54074	-3.22	DAZL	deleted in azoospermia like
202237_at	0.0051613	3.96e-05	6.31	2.53112	3.91	LOC101928916///NNMT	uncharacterized LOC101928916///nicotinamide N-methyltransferase
231483_at	0.0051661	3.97e-05	-6.31	2.5279	-4.13	LOC100505985	uncharacterized LOC100505985
215785_s_at	0.0051917	4e-05	-6.3	2.52032	-2.34	CYFIP2	cytoplasmic FMR1 interacting protein 2
204446_s_at	0.0051917	4.01e-05	6.3	2.51851	2.43	ALOX5	arachidonate 5-lipoxygenase
236892_s_at	0.0052422	4.06e-05	-6.29	2.50682	-5.08	HOXB-AS3	HOXB cluster antisense RNA 3
210432_s_at	0.005266	4.1e-05	-6.29	2.49718	-3.8	SCN3A	sodium voltage-gated channel alpha subunit 3
202920_at	0.005266	4.1e-05	-6.29	2.49643	-2.99	ANK2	ankyrin 2, neuronal
209343_at	0.005266	4.1e-05	-6.29	2.49557	-5.24	EFHD1	EF-hand domain family member D1
208396_s_at	0.0053023	4.17e-05	-6.28	2.47924	-3.08	PDE1A	phosphodiesterase 1A
223748_at	0.0053023	4.17e-05	-6.28	2.47915	-3.58	SLC4A11	solute carrier family 4 member 11
239420_at	0.0053023	4.18e-05	-6.27	2.47726	-4.45	LINC01187	long intergenic non-protein coding RNA 1187
215509_s_at	0.0053023	4.19e-05	6.27	2.47533	3.15	BUB1	BUB1 mitotic checkpoint serine/threonine kinase
220065_at	0.0053367	4.24e-05	-6.26	2.46366	-3.7	TNMD	tenomodulin
204846_at	0.0053367	4.25e-05	6.26	2.46147	4.92	CP	ceruloplasmin (ferroxidase)
226245_at	0.0053367	4.26e-05	-6.26	2.45839	-2.69	KCTD1	potassium channel tetramerization domain containing 1
226096_at	0.0053367	4.26e-05	-6.26	2.45831	-3.57	FNDC5	fibronectin type III domain containing 5
226273_at	0.0053367	4.27e-05	-6.26	2.45676	-2.46	CLCN5	chloride voltage-gated channel 5
220539_at	0.0053367	4.28e-05	-6.26	2.45403	-2.39	CFAP46	cilia and flagella associated protein 46
1558411_at	0.0053367	4.29e-05	-6.26	2.45346	-3.3	EGFEM1P	EGF like and EMI domain containing 1, pseudogene
222784_at	0.005341	4.3e-05	-6.25	2.44918	-2.49	SMOC1	SPARC related modular calcium binding 1
226597_at	0.005341	4.31e-05	-6.25	2.44827	-5.35	REEP6	receptor accessory protein 6
204315_s_at	0.0053541	4.33e-05	6.25	2.44369	2.81	GTSE1	G2 and S-phase expressed 1
205592_at	0.0053618	4.34e-05	-6.25	2.44012	-4.27	SLC4A1	solute carrier family 4 member 1 (Diego blood group)
201036_s_at	0.0053744	4.37e-05	-6.24	2.43486	-2.45	HADH	hydroxyacyl-CoA dehydrogenase
226582_at	0.0053744	4.38e-05	-6.24	2.4319	-3.16	LOC400043	uncharacterized LOC400043
225681_at	0.0053744	4.41e-05	6.24	2.42605	4.01	CTHRC1	collagen triple helix repeat containing 1
208257_x_at	0.0053744	4.42e-05	-6.24	2.42428	-2.51	PSG1	pregnancy specific beta-1-glycoprotein 1
214204_at	0.0053744	4.42e-05	-6.24	2.42279	-2.48	PACRG	PARK2 coregulated
205522_at	0.0053744	4.42e-05	-6.24	2.42261	-2.11	HOXD4	homeobox D4
34471_at	0.0053915	4.45e-05	-6.23	2.41576	-4.36	MYH8	myosin heavy chain 8
210559_s_at	0.0053915	4.47e-05	6.23	2.41305	3.03	CDK1	cyclin dependent kinase 1
210397_at	0.0053915	4.48e-05	-6.23	2.41094	-4.36	DEFB1	defensin beta 1
209613_s_at	0.0054106	4.5e-05	-6.22	2.40537	-5.46	ADH1B	alcohol dehydrogenase 1B (class I), beta polypeptide
207299_s_at	0.005413	4.51e-05	-6.22	2.40281	-4.71	GRM1	glutamate metabotropic receptor 1
219554_at	0.0054154	4.53e-05	-6.22	2.39952	-4.38	RHCG	Rh family C glycoprotein
210343_s_at	0.0054154	4.56e-05	-6.22	2.39392	-5.08	SLC22A6	solute carrier family 22 member 6
211712_s_at	0.0054154	4.56e-05	-6.22	2.39269	-2.83	ANXA9	annexin A9
240100_at	0.0054154	4.57e-05	6.22	2.3918	2.3	LOC100505920	uncharacterized LOC100505920
204900_x_at	0.0055059	4.66e-05	6.2	2.37223	2.74	SAP30	Sin3A associated protein 30
206371_at	0.0055059	4.66e-05	-6.2	2.37149	-3.8	FOLR3	folate receptor 3
218999_at	0.0055417	4.71e-05	6.2	2.36254	2.07	TMEM140	transmembrane protein 140
241854_at	0.0055417	4.71e-05	-6.19	2.36101	-3.27	DNASE1	deoxyribonuclease 1
232776_at	0.0055861	4.76e-05	-6.19	2.35118	-3.89	PDZRN3	PDZ domain containing ring finger 3
228054_at	0.0055936	4.78e-05	6.18	2.34778	2.96	TMEM44	transmembrane protein 44
205934_at	0.0056318	4.82e-05	-6.18	2.33909	-3.42	PLCL1	phospholipase C like 1
220150_s_at	0.0056604	4.86e-05	-6.17	2.3321	-2.69	FAM184A	family with sequence similarity 184 member A
206704_at	0.0056682	4.87e-05	-6.17	2.32869	-2.78	CLCN5	chloride voltage-gated channel 5
204447_at	0.0057011	4.92e-05	-6.17	2.31868	-2.7	LZTS3	leucine zipper tumor suppressor family member 3
240807_at	0.0057011	4.92e-05	-6.16	2.31856	-2.26	LINC01187	long intergenic non-protein coding RNA 1187
224940_s_at	0.0057011	4.94e-05	-6.16	2.31483	-3.16	PAPPA	pappalysin 1
206381_at	0.0057181	4.97e-05	-6.16	2.30989	-3.82	SCN2A	sodium voltage-gated channel alpha subunit 2
204962_s_at	0.0057299	4.99e-05	6.16	2.30585	2.92	SLC35F6///CENPA	solute carrier family 35 member F6///centromere protein A
212848_s_at	0.0057615	5.05e-05	-6.15	2.29329	-2.08	C9orf3	chromosome 9 open reading frame 3
232737_s_at	0.0057615	5.06e-05	6.15	2.29237	3.82	ENPP3	ectonucleotide pyrophosphatase/phosphodiesterase 3
239252_at	0.0057732	5.09e-05	-6.14	2.28654	-2.83	COX7B	cytochrome c oxidase subunit 7B
236957_at	0.0057732	5.09e-05	6.14	2.28636	3.09	CDCA2	cell division cycle associated 2
237058_x_at	0.0058123	5.14e-05	-6.14	2.27732	-2.52	SLC6A13	solute carrier family 6 member 13
219414_at	0.0058123	5.15e-05	-6.14	2.27577	-4.07	CLSTN2	calsyntenin 2
209460_at	0.0058259	5.18e-05	-6.13	2.26949	-3.38	ABAT	4-aminobutyrate aminotransferase
210553_x_at	0.0058388	5.2e-05	6.13	2.26533	3.4	LOC100507472///PCSK6	uncharacterized LOC100507472///proprotein convertase subtilisin/kexin type 6
1553998_at	0.005849	5.22e-05	-6.13	2.26103	-1.81	DMRTC1B///DMRTC1	DMRT like family C1B///DMRT like family C1
227865_at	0.005849	5.24e-05	-6.12	2.25775	-2.87	IDNK	IDNK, gluconokinase
213992_at	0.005849	5.24e-05	-6.12	2.25767	-3.86	COL4A6	collagen type IV alpha 6 chain
229599_at	0.0058503	5.27e-05	-6.12	2.25324	-3.02	SMIM22	small integral membrane protein 22
208435_s_at	0.0058503	5.28e-05	-6.12	2.25078	-1.93	AQP6	aquaporin 6
209891_at	0.0058503	5.29e-05	6.12	2.24955	3.15	SPC25	SPC25, NDC80 kinetochore complex component
220889_s_at	0.0059001	5.34e-05	-6.11	2.23924	-4.48	CA10	carbonic anhydrase 10
221477_s_at	0.0059001	5.36e-05	6.11	2.23543	2.13	LOC100129518///SOD2	uncharacterized LOC100129518///superoxide dismutase 2, mitochondrial
213285_at	0.0059902	5.46e-05	-6.1	2.21873	-4.65	TMEM30B	transmembrane protein 30B
228656_at	0.0060715	5.56e-05	-6.08	2.20012	-2.83	PROX1	prospero homeobox 1
221591_s_at	0.0060715	5.56e-05	6.08	2.20011	2.54	FAM64A	family with sequence similarity 64 member A
228375_at	0.0060715	5.56e-05	-6.08	2.19977	-4.09	IGSF11	immunoglobulin superfamily member 11
204951_at	0.0060727	5.58e-05	6.08	2.19764	3.1	RHOH	ras homolog family member H
210119_at	0.0061079	5.62e-05	-6.08	2.19008	-3.3	KCNJ15	potassium voltage-gated channel subfamily J member 15
206556_at	0.0061144	5.64e-05	-6.08	2.18711	-4.36	CLUL1	clusterin like 1
229309_at	0.0061146	5.65e-05	-6.07	2.18516	-4.3	ADRB1	adrenoceptor beta 1
233661_at	0.006143	5.69e-05	-6.07	2.17872	-2.81	LINC00557	long intergenic non-protein coding RNA 557
239178_at	0.0062331	5.78e-05	-6.06	2.16264	-6.46	FGF9	fibroblast growth factor 9
1560554_a_at	0.0062366	5.79e-05	-6.06	2.16017	-2.9	C1orf145	chromosome 1 open reading frame 145
222919_at	0.0062666	5.85e-05	-6.05	2.15093	-3.55	TRDN	triadin
239242_at	0.0062666	5.88e-05	-6.05	2.14661	-2.11	SLC25A5-AS1	SLC25A5 antisense RNA 1
218285_s_at	0.0062666	5.88e-05	-6.05	2.14658	-2.28	BDH2	3-hydroxybutyrate dehydrogenase, type 2
205751_at	0.0062666	5.88e-05	-6.05	2.14597	-6.03	SH3GL2	SH3 domain containing GRB2 like 2, endophilin A1
238125_at	0.0062899	5.91e-05	-6.04	2.14046	-2.66	ADAMTS16	ADAM metallopeptidase with thrombospondin type 1 motif 16
239183_at	0.0062939	5.93e-05	-6.04	2.13795	-4.89	ANGPTL1	angiopoietin like 1
225750_at	0.0062949	5.94e-05	6.04	2.1359	2.5	ERO1A	endoplasmic reticulum oxidoreductase 1 alpha
220801_s_at	0.0062976	5.95e-05	-6.04	2.1336	-4.31	HAO2	hydroxyacid oxidase 2
211806_s_at	0.0063617	6.03e-05	-6.03	2.12186	-2.58	KCNJ15	potassium voltage-gated channel subfamily J member 15
228407_at	0.0064472	6.12e-05	-6.02	2.10699	-2.49	SCUBE3	signal peptide, CUB domain and EGF like domain containing 3
203889_at	0.0064999	6.2e-05	6.01	2.09375	2.49	SCG5	secretogranin V
221566_s_at	0.0064999	6.21e-05	6.01	2.09346	3.41	NOL3	nucleolar protein 3
221648_s_at	0.0065038	6.22e-05	-6.01	2.09101	-2.61	AGMAT	agmatinase
214974_x_at	0.0065113	6.25e-05	6.01	2.0866	6.14	CXCL5	C-X-C motif chemokine ligand 5
227763_at	0.0065113	6.26e-05	-6.01	2.08509	-3.2	LYPD6	LY6/PLAUR domain containing 6
204570_at	0.0065113	6.26e-05	-6.01	2.08431	-2.28	COX7A1	cytochrome c oxidase subunit 7A1
220918_at	0.0065189	6.28e-05	6	2.08133	2.94	RUNX1-IT1	RUNX1 intronic transcript 1
231232_at	0.0065622	6.35e-05	-6	2.07146	-3.37	LOC100506125	uncharacterized LOC100506125
236302_at	0.0065622	6.35e-05	-6	2.07119	-3.86	PPM1E	protein phosphatase, Mg2+/Mn2+ dependent 1E
230422_at	0.0065634	6.37e-05	6	2.06839	2.37	FPR3	formyl peptide receptor 3
201981_at	0.0065634	6.37e-05	-5.99	2.06734	-2.38	PAPPA	pappalysin 1
230087_at	0.0065675	6.43e-05	5.99	2.05961	4.09	PRIMA1	proline rich membrane anchor 1
227226_at	0.0065675	6.43e-05	-5.99	2.05961	-2.85	MRAP2	melanocortin 2 receptor accessory protein 2
209220_at	0.0065675	6.43e-05	-5.99	2.05918	-3.3	GPC3	glypican 3
239791_at	0.0065675	6.44e-05	-5.99	2.0576	-2.59	HOXB-AS3	HOXB cluster antisense RNA 3
228194_s_at	0.0065727	6.46e-05	-5.99	2.05501	-3.68	SORCS1	sortilin related VPS10 domain containing receptor 1
1553155_x_at	0.0065806	6.48e-05	-5.98	2.05203	-3.7	ATP6V0D2	ATPase H+ transporting V0 subunit d2
202870_s_at	0.0066801	6.59e-05	5.97	2.03561	2.1	CDC20	cell division cycle 20
214043_at	0.0066824	6.6e-05	-5.97	2.03346	-3.57	PTPRD	protein tyrosine phosphatase, receptor type D
240320_at	0.0067135	6.64e-05	-5.97	2.02714	-3.61	RNF212B	ring finger protein 212B
226834_at	0.0067533	6.69e-05	-5.96	2.01957	-3.73	CLMP	CXADR like membrane protein
211384_s_at	0.0068065	6.76e-05	-5.96	2.00955	-3.75	CASR	calcium sensing receptor
222967_at	0.0068065	6.78e-05	-5.96	2.0079	-3.35	SLC5A7	solute carrier family 5 member 7
206600_s_at	0.0068065	6.79e-05	-5.95	2.00595	-2.59	SLC16A5	solute carrier family 16 member 5
216219_at	0.0068065	6.8e-05	-5.95	2.00477	-3.69	AQP6	aquaporin 6
223789_s_at	0.0068298	6.83e-05	5.95	1.99963	2.77	GTPBP2	GTP binding protein 2
202638_s_at	0.0068298	6.86e-05	5.95	1.9964	2.85	ICAM1	intercellular adhesion molecule 1
242317_at	0.0068481	6.89e-05	-5.94	1.99171	-2.29	HIGD1A	HIG1 hypoxia inducible domain family member 1A
1557078_at	0.0068484	6.9e-05	5.94	1.98991	2.86	SLFN5	schlafen family member 5
223618_at	0.0068942	6.96e-05	-5.94	1.98164	-3.47	FMN2	formin 2
211737_x_at	0.0069805	7.06e-05	-5.93	1.96775	-3.09	PTN	pleiotrophin
239010_at	0.0070065	7.12e-05	5.92	1.95994	5.03	DUXAP10	double homeobox A pseudogene 10
201720_s_at	0.0070065	7.13e-05	5.92	1.95823	2.57	LAPTM5	lysosomal protein transmembrane 5
220723_s_at	0.0070065	7.14e-05	-5.92	1.95714	-5.19	CWH43	cell wall biogenesis 43 C-terminal homolog
229341_at	0.0070065	7.15e-05	-5.92	1.95557	-4.94	TFCP2L1	transcription factor CP2-like 1
229392_s_at	0.0070065	7.15e-05	-5.92	1.95502	-2.45	PIK3R2	phosphoinositide-3-kinase regulatory subunit 2
229782_at	0.0070065	7.16e-05	-5.92	1.95361	-6.02	RMST	rhabdomyosarcoma 2 associated transcript (non-protein coding)
220624_s_at	0.0071022	7.29e-05	-5.91	1.93691	-3.92	ELF5	E74 like ETS transcription factor 5
201904_s_at	0.0071409	7.34e-05	-5.9	1.92987	-2.33	CTDSPL	CTD small phosphatase like
237989_at	0.0071939	7.41e-05	-5.9	1.92028	-2.63	IGFBP1	insulin like growth factor binding protein 1
228128_x_at	0.0071939	7.43e-05	-5.9	1.91797	-2.99	PAPPA	pappalysin 1
209040_s_at	0.0072254	7.48e-05	5.89	1.91148	1.91	PSMB8	proteasome subunit beta 8
205776_at	0.0073067	7.59e-05	-5.88	1.89722	-3.01	FMO5	flavin containing monooxygenase 5
206067_s_at	0.0073067	7.59e-05	-5.88	1.89713	-3.87	WT1	Wilms tumor 1
224428_s_at	0.0073406	7.65e-05	5.88	1.88951	1.87	CDCA7	cell division cycle associated 7
203362_s_at	0.0073406	7.65e-05	5.88	1.88918	1.89	MAD2L1	MAD2 mitotic arrest deficient-like 1 (yeast)
216893_s_at	0.0073853	7.72e-05	-5.87	1.88067	-2.43	COL4A3	collagen type IV alpha 3 chain
218404_at	0.0073853	7.73e-05	5.87	1.87985	2.36	SNX10	sorting nexin 10
228502_at	0.0074164	7.77e-05	-5.87	1.87404	-5.51	RPS6KA6	ribosomal protein S6 kinase A6
205412_at	0.0074192	7.79e-05	-5.86	1.87197	-2.26	ACAT1	acetyl-CoA acetyltransferase 1
231398_at	0.0074592	7.84e-05	-5.86	1.86502	-5.01	SLC22A7	solute carrier family 22 member 7
218039_at	0.0074748	7.87e-05	5.86	1.8613	2.09	NUSAP1	nucleolar and spindle associated protein 1
222557_at	0.0074761	7.89e-05	5.86	1.85944	2.43	STMN3	stathmin 3
1553392_at	0.0075117	7.94e-05	5.85	1.85311	3.54	LOC102724660///EFCAB3	uncharacterized LOC102724660///EF-hand calcium binding domain 3
203066_at	0.0075157	7.96e-05	5.85	1.8509	2.47	CHST15	carbohydrate (N-acetylgalactosamine 4-sulfate 6-O) sulfotransferase 15
1553722_s_at	0.0075614	8.02e-05	-5.85	1.84331	-2.3	RNF152	ring finger protein 152
212171_x_at	0.0075653	8.05e-05	5.84	1.83985	2.27	VEGFA	vascular endothelial growth factor A
205984_at	0.0075653	8.05e-05	-5.84	1.83944	-5.27	CRHBP	corticotropin releasing hormone binding protein
225009_at	0.0076096	8.11e-05	-5.84	1.83206	-2.41	CMTM4	CKLF like MARVEL transmembrane domain containing 4
226846_at	0.0076219	8.16e-05	-5.83	1.82673	-3.52	PHYHD1	phytanoyl-CoA dioxygenase domain containing 1
228504_at	0.0076219	8.16e-05	-5.83	1.82641	-4.19	SCN7A	sodium voltage-gated channel alpha subunit 7
207401_at	0.0076219	8.17e-05	-5.83	1.82549	-3.45	PROX1	prospero homeobox 1
227642_at	0.007635	8.2e-05	-5.83	1.82214	-5.41	TFCP2L1	transcription factor CP2-like 1
218145_at	0.007674	8.25e-05	5.83	1.81551	3.72	TRIB3	tribbles pseudokinase 3
227019_at	0.0076792	8.27e-05	-5.83	1.81319	-2.31	C1orf226	chromosome 1 open reading frame 226
207526_s_at	0.0077143	8.35e-05	-5.82	1.80421	-4.51	IL1RL1	interleukin 1 receptor like 1
209443_at	0.0077143	8.35e-05	-5.82	1.80387	-5.33	SERPINA5	serpin family A member 5
201302_at	0.0077143	8.35e-05	5.82	1.80379	1.75	ANXA4	annexin A4
227506_at	0.0077325	8.41e-05	-5.82	1.79752	-3.8	SLC16A9	solute carrier family 16 member 9
203438_at	0.0077325	8.42e-05	5.81	1.79562	3.17	STC2	stanniocalcin 2
218342_s_at	0.0077325	8.43e-05	-5.81	1.79457	-2.11	ERMP1	endoplasmic reticulum metallopeptidase 1
229019_at	0.0077325	8.45e-05	-5.81	1.79293	-4.69	ZNF385B	zinc finger protein 385B
229390_at	0.0077325	8.46e-05	5.81	1.79175	3.69	FAM26F	family with sequence similarity 26 member F
212181_s_at	0.0077325	8.46e-05	-5.81	1.79121	-2.01	NUDT4P1///NUDT4P2///NUDT4	nudix hydrolase 4 pseudogene 1///nudix hydrolase 4 pseudogene 2///nudix hydrolase 4
244518_at	0.0077325	8.47e-05	-5.81	1.79001	-2.46	LOC100130452	uncharacterized LOC100130452
231223_at	0.0077544	8.56e-05	-5.8	1.78028	-3.73	CSMD1	CUB and Sushi multiple domains 1
214324_at	0.0077544	8.57e-05	-5.8	1.77919	-3.57	GP2	glycoprotein 2
219572_at	0.0077544	8.59e-05	-5.8	1.7768	-2.57	CADPS2	calcium dependent secretion activator 2
1553809_a_at	0.0077544	8.61e-05	-5.8	1.77435	-2.29	TMEM252	transmembrane protein 252
233801_s_at	0.0077544	8.61e-05	-5.8	1.77429	-3.72	SEMA6D	semaphorin 6D
205471_s_at	0.0078278	8.72e-05	-5.79	1.76126	-2.49	DACH1	dachshund family transcription factor 1
242662_at	0.0078278	8.73e-05	5.79	1.76074	3.4	PCSK6	proprotein convertase subtilisin/kexin type 6
224048_at	0.0078278	8.73e-05	-5.79	1.76028	-3.29	USP44	ubiquitin specific peptidase 44
236085_at	0.0078636	8.79e-05	-5.79	1.75422	-4.07	CAPSL	calcyphosine like
230865_at	0.0078874	8.83e-05	-5.78	1.74968	-4.22	LIX1	limb and CNS expressed 1
210565_at	0.0079015	8.86e-05	-5.78	1.74634	-2.37	GCGR	glucagon receptor
1562046_at	0.0079745	8.96e-05	-5.77	1.73577	-4.35	LOC101927244	uncharacterized LOC101927244
214023_x_at	0.0080198	9.02e-05	-5.77	1.72865	-3.19	TUBB2B	tubulin beta 2B class IIb
243087_at	0.0080407	9.06e-05	-5.77	1.72452	-2.93	WDR63	WD repeat domain 63
211192_s_at	0.0080828	9.13e-05	5.76	1.71649	2.66	CD84	CD84 molecule
1552721_a_at	0.0080828	9.14e-05	-5.76	1.71617	-4.7	FGF1	fibroblast growth factor 1
231260_at	0.0080828	9.15e-05	-5.76	1.71459	-3.31	ZNF582-AS1	ZNF582 antisense RNA 1 (head to head)
206842_at	0.0080828	9.17e-05	5.76	1.7131	2.62	KCND1	potassium voltage-gated channel subfamily D member 1
205117_at	0.0080927	9.21e-05	-5.76	1.70822	-4.42	FGF1	fibroblast growth factor 1
205051_s_at	0.0080927	9.22e-05	-5.76	1.70719	-2.5	KIT	KIT proto-oncogene receptor tyrosine kinase
230802_at	0.0081011	9.25e-05	-5.75	1.7046	-2.28	ARHGAP24	Rho GTPase activating protein 24
209439_s_at	0.0081603	9.33e-05	5.75	1.69593	2.08	PHKA2	phosphorylase kinase regulatory subunit alpha 2
201890_at	0.008169	9.35e-05	5.75	1.69333	2.75	RRM2	ribonucleotide reductase regulatory subunit M2
207249_s_at	0.0082201	9.43e-05	-5.74	1.68568	-3.84	SLC28A2	solute carrier family 28 member 2
204824_at	0.0082232	9.45e-05	-5.74	1.68376	-2.3	ENDOG	endonuclease G
202235_at	0.0083778	9.65e-05	5.73	1.663	3.58	SLC16A1	solute carrier family 16 member 1
206584_at	0.0083778	9.66e-05	5.73	1.66209	2.6	LY96	lymphocyte antigen 96
200979_at	0.0083778	9.67e-05	-5.73	1.6609	-1.76	PDHA1	pyruvate dehydrogenase (lipoamide) alpha 1
202856_s_at	0.0084308	9.75e-05	5.72	1.65319	2.89	MIR6787///SLC16A3	microRNA 6787///solute carrier family 16 member 3
224339_s_at	0.0084473	9.79e-05	-5.72	1.64873	-3.68	ANGPTL1	angiopoietin like 1
219660_s_at	0.0084473	9.8e-05	-5.72	1.64761	-2.73	ATP8A2	ATPase phospholipid transporting 8A2
215129_at	0.0084473	9.81e-05	-5.72	1.64665	-3.84	PIK3C2G	phosphatidylinositol-4-phosphate 3-kinase catalytic subunit type 2 gamma
1554842_at	0.0084747	9.86e-05	-5.71	1.64195	-3.73	SLC12A1	solute carrier family 12 member 1
229148_at	0.008507	9.91e-05	-5.71	1.6367	-2.33	HOTAIRM1///HOXA2	HOXA transcript antisense RNA, myeloid-specific 1///homeobox A2
238778_at	0.0085645	9.99e-05	-5.7	1.62858	-2.63	MPP7	membrane palmitoylated protein 7
59625_at	0.0085645	0.0001	5.7	1.62704	2.16	NOL3	nucleolar protein 3
204006_s_at	0.0085694	0.0001	5.7	1.62496	3.15	FCGR3B///FCGR3A	Fc fragment of IgG receptor IIIb///Fc fragment of IgG receptor IIIa
218585_s_at	0.0086377	0.000101	5.7	1.61474	2.25	DTL	denticleless E3 ubiquitin protein ligase homolog
234314_at	0.0086377	0.000101	-5.7	1.61416	-4.38	RALGAPA2	Ral GTPase activating protein catalytic alpha subunit 2
217874_at	0.0086433	0.000102	-5.69	1.61048	-2.26	SUCLG1	succinate-CoA ligase alpha subunit
204766_s_at	0.0086809	0.000102	5.69	1.60472	2.51	NUDT1	nudix hydrolase 1
241898_at	0.0087596	0.000104	-5.68	1.58937	-2	LIPH	lipase H
234782_at	0.0087596	0.000104	-5.68	1.58855	-2.36	KLHL31	kelch like family member 31
205827_at	0.0087596	0.000104	-5.68	1.5876	-2.66	CCK	cholecystokinin
221796_at	0.0087596	0.000104	-5.68	1.58633	-5.1	NTRK2	neurotrophic receptor tyrosine kinase 2
237413_at	0.0087596	0.000104	-5.68	1.58532	-1.97	MAPK10	mitogen-activated protein kinase 10
225072_at	0.0087596	0.000105	-5.68	1.58385	-2.32	ZCCHC3	zinc finger CCHC-type containing 3
207407_x_at	0.008767	0.000105	-5.67	1.58152	-4.73	CYP4A11	cytochrome P450 family 4 subfamily A member 11
211743_s_at	0.0087825	0.000105	5.67	1.5783	2.56	PRG2	proteoglycan 2, pro eosinophil major basic protein
207693_at	0.0088019	0.000106	-5.67	1.57465	-2.44	CACNB4	calcium voltage-gated channel auxiliary subunit beta 4
226452_at	0.008812	0.000106	5.67	1.57204	2.97	PDK1	pyruvate dehydrogenase kinase 1
238919_at	0.0089397	0.000108	-5.66	1.55434	-6.48	PCDH9	protocadherin 9
212143_s_at	0.0089558	0.000108	5.65	1.55028	2.94	IGFBP3	insulin like growth factor binding protein 3
239765_at	0.0090259	0.000109	-5.65	1.53971	-4.31	CPEB3	cytoplasmic polyadenylation element binding protein 3
221870_at	0.0090669	0.00011	5.64	1.5329	4.14	EHD2	EH domain containing 2
225212_at	0.0090669	0.00011	-5.64	1.53043	-3.04	SLC25A25	solute carrier family 25 member 25
244656_at	0.0090669	0.000111	-5.64	1.53007	-2.43	RASL10B	RAS like family 10 member B
211262_at	0.0090669	0.000111	5.64	1.52896	3.08	PCSK6	proprotein convertase subtilisin/kexin type 6
205258_at	0.0090669	0.000111	5.64	1.52792	3.61	INHBB	inhibin beta B subunit
228346_at	0.009078	0.000111	-5.64	1.52527	-2.61	ZNF844	zinc finger protein 844
204289_at	0.0091071	0.000112	-5.63	1.52067	-4.39	ALDH6A1	aldehyde dehydrogenase 6 family member A1
204130_at	0.0091395	0.000112	-5.63	1.51574	-5.7	HSD11B2	hydroxysteroid 11-beta dehydrogenase 2
231906_at	0.0091814	0.000113	-5.63	1.50836	-2.15	HOXD8	homeobox D8
219978_s_at	0.0091945	0.000113	5.63	1.50551	2.24	NUSAP1	nucleolar and spindle associated protein 1
1558077_s_at	0.0091987	0.000114	-5.62	1.50361	-1.73	MDH1B	malate dehydrogenase 1B
203641_s_at	0.0092428	0.000114	-5.62	1.49661	-2.82	COBLL1	cordon-bleu WH2 repeat protein like 1
232501_at	0.0092428	0.000114	-5.62	1.49604	-3.03	RNF150	ring finger protein 150
1555923_a_at	0.0093058	0.000116	-5.61	1.4865	-3.34	CASC10	cancer susceptibility candidate 10
206768_at	0.0093328	0.000116	-5.61	1.48033	-2.87	RPL3L	ribosomal protein L3 like
226773_at	0.0093328	0.000116	-5.61	1.48006	-2.13	PPM1K	protein phosphatase, Mg2+/Mn2+ dependent 1K
211887_x_at	0.0093328	0.000116	5.61	1.47936	2.4	MSR1	macrophage scavenger receptor 1
201292_at	0.009385	0.000117	5.6	1.47124	3.12	TOP2A	topoisomerase (DNA) II alpha
203914_x_at	0.009385	0.000118	-5.6	1.46972	-4.31	HPGD	hydroxyprostaglandin dehydrogenase 15-(NAD)
203828_s_at	0.009385	0.000118	5.6	1.46862	2.77	IL32	interleukin 32
205355_at	0.009385	0.000118	-5.6	1.46791	-2.09	ACADSB	acyl-CoA dehydrogenase, short/branched chain
201721_s_at	0.009385	0.000118	5.6	1.46676	2.13	LAPTM5	lysosomal protein transmembrane 5
214437_s_at	0.0094439	0.000119	5.6	1.45899	2.34	SHMT2	serine hydroxymethyltransferase 2
216910_at	0.0094439	0.000119	-5.59	1.45779	-5.17	XPNPEP2	X-prolyl aminopeptidase 2
202286_s_at	0.0094478	0.000119	-5.59	1.45597	-5.38	TACSTD2	tumor-associated calcium signal transducer 2
1556776_a_at	0.0094663	0.00012	-5.59	1.45264	-2.97	LOC101928238	uncharacterized LOC101928238
206302_s_at	0.0094999	0.00012	-5.59	1.44775	-1.91	NUDT4P1///NUDT4P2///NUDT4	nudix hydrolase 4 pseudogene 1///nudix hydrolase 4 pseudogene 2///nudix hydrolase 4
216950_s_at	0.0096025	0.000122	5.58	1.43296	3.06	FCGR1CP///FCGR1B///FCGR1A	Fc fragment of IgG receptor Ic, pseudogene///Fc fragment of IgG receptor Ib///Fc fragment of IgG receptor Ia
227764_at	0.0096025	0.000122	-5.58	1.43152	-2.56	LYPD6	LY6/PLAUR domain containing 6
211569_s_at	0.0096025	0.000122	-5.58	1.43115	-2.5	HADH	hydroxyacyl-CoA dehydrogenase
222258_s_at	0.0096025	0.000122	-5.58	1.43078	-2.12	SH3BP4	SH3 domain binding protein 4
227253_at	0.0096025	0.000122	5.58	1.43001	4.66	CP	ceruloplasmin (ferroxidase)
216079_at	0.0096025	0.000123	-5.58	1.42809	-3.05	EPM2A	epilepsy, progressive myoclonus type 2A, Lafora disease (laforin)
209242_at	0.0096025	0.000123	-5.57	1.42739	-2.76	PEG3	paternally expressed 3
227554_at	0.0096095	0.000123	-5.57	1.42528	-2.61	MAGI2-AS3	MAGI2 antisense RNA 3
219410_at	0.0096441	0.000124	5.57	1.4178	4.28	TMEM45A	transmembrane protein 45A
218663_at	0.0096441	0.000124	5.57	1.41766	3.13	NCAPG	non-SMC condensin I complex subunit G
220324_at	0.0096441	0.000124	-5.57	1.41645	-4.52	LINC00472	long intergenic non-protein coding RNA 472
1552767_a_at	0.0096441	0.000124	-5.57	1.41619	-4.84	HS6ST2	heparan sulfate 6-O-sulfotransferase 2
213547_at	0.0097089	0.000125	-5.56	1.40824	-2.09	CAND2	cullin associated and neddylation dissociated 2 (putative)
221221_s_at	0.0097253	0.000126	-5.56	1.40382	-2.69	KLHL3	kelch like family member 3
231683_at	0.009742	0.000126	-5.56	1.40076	-3.36	GLYAT	glycine-N-acyltransferase
203820_s_at	0.0097523	0.000126	5.56	1.39834	3.74	IGF2BP3	insulin like growth factor 2 mRNA binding protein 3
202998_s_at	0.0097747	0.000127	5.55	1.39388	2.85	LOXL2	lysyl oxidase like 2
1555907_at	0.0097747	0.000127	5.55	1.3928	2.51	AGAP2-AS1	AGAP2 antisense RNA 1
236489_at	0.0097747	0.000127	-5.55	1.39159	-5.15	ADGRF1	adhesion G protein-coupled receptor F1
214471_x_at	0.0097747	0.000128	-5.55	1.38999	-3.67	CGB1///LHB	chorionic gonadotropin beta subunit 1///luteinizing hormone beta polypeptide
238756_at	0.0097747	0.000128	5.55	1.38922	2.8	GAS2L3	growth arrest specific 2 like 3
242943_at	0.0097785	0.000128	5.55	1.38746	2.44	ST8SIA4	ST8 alpha-N-acetyl-neuraminide alpha-2,8-sialyltransferase 4
218847_at	0.0097849	0.000128	-5.55	1.38546	-2.04	IGF2BP2	insulin like growth factor 2 mRNA binding protein 2
203115_at	0.0098067	0.000129	-5.55	1.38191	-2.27	FECH	ferrochelatase
239798_at	0.0098334	0.000129	5.54	1.37706	1.79	PDK1	pyruvate dehydrogenase kinase 1
208491_s_at	0.0098334	0.00013	-5.54	1.37113	-2.36	PGM5	phosphoglucomutase 5
208902_s_at	0.0098334	0.00013	-5.54	1.37094	-2.84	RPS28	ribosomal protein S28
235050_at	0.0098334	0.00013	-5.54	1.37088	-3.54	SLC2A12	solute carrier family 2 member 12
211661_x_at	0.0098334	0.00013	5.54	1.37005	2.66	PTAFR	platelet activating factor receptor
238160_at	0.0098334	0.00013	-5.54	1.36974	-3.38	ACOT12	acyl-CoA thioesterase 12
218692_at	0.0098463	0.000131	5.54	1.3671	3.14	SYBU	syntabulin
209652_s_at	0.0098516	0.000131	5.53	1.36516	4.13	PGF	placental growth factor
201105_at	0.0098516	0.000131	5.53	1.36388	1.98	LGALS1	galectin 1
209757_s_at	0.0099232	0.000132	-5.53	1.3536	-4.12	MYCN	v-myc avian myelocytomatosis viral oncogene neuroblastoma derived homolog
207057_at	0.0099232	0.000132	-5.53	1.35274	-2.95	SLC16A7	solute carrier family 16 member 7
1553734_at	0.0099232	0.000133	-5.53	1.35164	-3.14	AK7	adenylate kinase 7
226246_at	0.0099232	0.000133	-5.53	1.35142	-2.22	KCTD1	potassium channel tetramerization domain containing 1
225809_at	0.0100425	0.000135	-5.52	1.33739	-2.89	PARM1	prostate androgen-regulated mucin-like protein 1
227209_at	0.0100425	0.000135	-5.52	1.3365	-3.6	CNTN1	contactin 1
203116_s_at	0.0100425	0.000135	-5.52	1.33571	-1.99	FECH	ferrochelatase
227910_at	0.0100464	0.000135	-5.51	1.334	-2.35	XPNPEP3	X-prolyl aminopeptidase 3
1557176_a_at	0.0100534	0.000135	-5.51	1.33197	-3.43	C14orf37	chromosome 14 open reading frame 37
1553009_s_at	0.0100782	0.000136	-5.51	1.32824	-1.92	REXO1L1P	REX1, RNA exonuclease 1 homolog-like 1, pseudogene
227241_at	0.0101359	0.000137	-5.51	1.32131	-6.27	MUC15	mucin 15, cell surface associated
215945_s_at	0.0101559	0.000137	-5.5	1.31807	-2.36	TRIM2	tripartite motif containing 2
213113_s_at	0.0101726	0.000138	5.5	1.31496	2.17	SLC43A3	solute carrier family 43 member 3
235265_at	0.0101726	0.000138	-5.5	1.31311	-1.95	UBR3	ubiquitin protein ligase E3 component n-recognin 3 (putative)
228233_at	0.0101726	0.000138	-5.5	1.31249	-4.63	FREM1	FRAS1 related extracellular matrix 1
223074_s_at	0.0101767	0.000138	-5.5	1.31077	-3.51	AIF1L	allograft inflammatory factor 1 like
201666_at	0.0103326	0.000141	5.49	1.29456	2.47	TIMP1	TIMP metallopeptidase inhibitor 1
235948_at	0.0103369	0.000141	5.49	1.29284	2.2	RIMKLA	ribosomal modification protein rimK like family member A
210472_at	0.0103592	0.000141	-5.49	1.28941	-3.56	MT1G	metallothionein 1G
220271_x_at	0.0104288	0.000142	-5.48	1.28154	-2.59	EFCAB6	EF-hand calcium binding domain 6
223986_x_at	0.0105071	0.000144	-5.48	1.2729	-3.84	DMRT2	doublesex and mab-3 related transcription factor 2
1556826_s_at	0.0105086	0.000144	-5.47	1.27035	-2.9	DRAXIN	dorsal inhibitory axon guidance protein
221067_s_at	0.0105086	0.000144	-5.47	1.27015	-2.61	SPX	spexin hormone
229744_at	0.0105722	0.000145	-5.47	1.26293	-1.86	SSFA2	sperm specific antigen 2
215085_x_at	0.0105854	0.000146	-5.47	1.2604	-2.5	DLEC1	deleted in lung and esophageal cancer 1
219954_s_at	0.0105854	0.000146	-5.47	1.25722	-3.31	GBA3	glucosylceramidase beta 3 (gene/pseudogene)
213709_at	0.0105854	0.000146	-5.47	1.25683	-2.24	BHLHB9	basic helix-loop-helix domain containing, class B, 9
204698_at	0.0105854	0.000146	5.46	1.25582	3.52	ISG20	interferon stimulated exonuclease gene 20
1554749_s_at	0.0105854	0.000146	-5.46	1.25521	-4.19	CLCNKB	chloride voltage-gated channel Kb
208034_s_at	0.0106271	0.000147	-5.46	1.24904	-3	PROZ	protein Z, vitamin K dependent plasma glycoprotein
232056_at	0.0106271	0.000147	-5.46	1.24877	-3.95	SCEL	sciellin
232869_at	0.0106764	0.000148	-5.46	1.24278	-3.1	SRGAP3	SLIT-ROBO Rho GTPase activating protein 3
230836_at	0.0106764	0.000148	5.46	1.24166	2.35	ST8SIA4	ST8 alpha-N-acetyl-neuraminide alpha-2,8-sialyltransferase 4
215729_s_at	0.0106922	0.000149	-5.45	1.23892	-3.78	VGLL1	vestigial like family member 1
223858_at	0.0107179	0.000149	-5.45	1.23528	-2.9	ESRRB	estrogen related receptor beta
240015_at	0.0107698	0.00015	-5.45	1.22926	-1.73	PRKCQ-AS1	PRKCQ antisense RNA 1
205780_at	0.010783	0.000151	-5.44	1.22421	-3.56	BIK	BCL2 interacting killer
221724_s_at	0.0108855	0.000153	5.44	1.21243	2.98	CLEC4A	C-type lectin domain family 4 member A
212183_at	0.0108855	0.000153	-5.44	1.21212	-2.29	NUDT4P1///NUDT4	nudix hydrolase 4 pseudogene 1///nudix hydrolase 4
219945_at	0.010978	0.000155	-5.43	1.20099	-2.6	DDX25	DEAD-box helicase 25
230595_at	0.010978	0.000155	-5.43	1.20027	-3.37	PGM5-AS1	PGM5 antisense RNA 1
235639_at	0.0109911	0.000156	-5.42	1.19244	-2.42	CDH19	cadherin 19
215049_x_at	0.0109911	0.000156	5.42	1.19204	2.56	CD163	CD163 molecule
205729_at	0.0109911	0.000156	5.42	1.19156	2.29	OSMR	oncostatin M receptor
211143_x_at	0.0109911	0.000156	-5.42	1.19151	-3.46	NR4A1	nuclear receptor subfamily 4 group A member 1
229004_at	0.0110027	0.000157	-5.42	1.18675	-2.79	ADAMTS15	ADAM metallopeptidase with thrombospondin type 1 motif 15
201818_at	0.0110027	0.000157	5.42	1.1867	4.17	LPCAT1	lysophosphatidylcholine acyltransferase 1
230803_s_at	0.0110255	0.000157	-5.42	1.18341	-2.45	ARHGAP24	Rho GTPase activating protein 24
217319_x_at	0.0110322	0.000158	-5.42	1.18157	-4.36	CYP4A22///CYP4A11	cytochrome P450 family 4 subfamily A member 22///cytochrome P450 family 4 subfamily A member 11
230931_at	0.0110556	0.000158	-5.42	1.17809	-4.45	PLG	plasminogen
203706_s_at	0.0110556	0.000159	-5.41	1.17679	-1.97	FZD7	frizzled class receptor 7
205670_at	0.0110556	0.000159	5.41	1.17549	3.21	GAL3ST1	galactose-3-O-sulfotransferase 1
201037_at	0.0110556	0.000159	5.41	1.17449	2.04	PFKP	phosphofructokinase, platelet
204379_s_at	0.0110891	0.00016	-5.41	1.16904	-2.67	FGFR3	fibroblast growth factor receptor 3
220574_at	0.0110891	0.00016	-5.41	1.16894	-1.92	SEMA6D	semaphorin 6D
233047_at	0.0110891	0.00016	-5.41	1.16779	-2.62	FRMD7	FERM domain containing 7
1556606_at	0.011102	0.00016	-5.41	1.16541	-1.88	NAV2	neuron navigator 2
214279_s_at	0.0111733	0.000162	-5.4	1.15789	-2.12	NDRG2	NDRG family member 2
1557007_a_at	0.0111739	0.000162	-5.4	1.1566	-2.41	LOC105376530	uncharacterized LOC105376530
226621_at	0.01118	0.000162	5.4	1.15483	1.86	OSMR	oncostatin M receptor
217078_s_at	0.011189	0.000163	5.4	1.14937	2.76	CD300A	CD300a molecule
1559621_at	0.011189	0.000163	-5.4	1.14877	-3.1	LOC101927237	uncharacterized LOC101927237
218618_s_at	0.011189	0.000163	5.4	1.14826	2.28	LOC101928615///FNDC3B	uncharacterized LOC101928615///fibronectin type III domain containing 3B
224167_at	0.011189	0.000163	-5.4	1.14788	-2.91	SPZ1	spermatogenic leucine zipper 1
227997_at	0.0112536	0.000165	-5.39	1.14028	-2.19	IL17RD	interleukin 17 receptor D
222943_at	0.0112536	0.000165	-5.39	1.13978	-3.42	GBA3	glucosylceramidase beta 3 (gene/pseudogene)
227466_at	0.011309	0.000166	-5.39	1.13374	-1.6	FAM200B	family with sequence similarity 200 member B
204931_at	0.0113229	0.000166	-5.39	1.13009	-4.85	TCF21	transcription factor 21
1560396_at	0.0113229	0.000166	5.39	1.13009	3.37	KLHL6	kelch like family member 6
229696_at	0.0113792	0.000167	-5.38	1.12323	-2.06	FECH	ferrochelatase
206952_at	0.0113792	0.000168	-5.38	1.12279	-5.81	G6PC	glucose-6-phosphatase catalytic subunit
228116_at	0.0113831	0.000168	5.38	1.12123	2.96	LINC01296///DUXAP10///DUXAP8	long intergenic non-protein coding RNA 1296///double homeobox A pseudogene 10///double homeobox A pseudogene 8
243386_at	0.0114861	0.00017	-5.37	1.10961	-3.63	CASZ1	castor zinc finger 1
1563793_at	0.0114861	0.00017	-5.37	1.10731	-2.75	LOC100130278	uncharacterized LOC100130278
230329_s_at	0.0114861	0.00017	-5.37	1.10717	-1.8	NUDT6	nudix hydrolase 6
205242_at	0.0114861	0.00017	5.37	1.10715	4.27	CXCL13	C-X-C motif chemokine ligand 13
221389_at	0.0114861	0.00017	-5.37	1.10634	-2.55	PLA2G2E	phospholipase A2 group IIE
244608_at	0.0115351	0.000171	-5.37	1.10096	-2.77	MIR4307HG	MIR4307 host gene
226187_at	0.0117205	0.000174	-5.36	1.08411	-1.84	CDS1	CDP-diacylglycerol synthase 1
226424_at	0.0117438	0.000175	-5.35	1.08096	-3.84	CAPS	calcyphosine
241346_at	0.0117731	0.000176	-5.35	1.07631	-2.2	ARHGAP30	Rho GTPase activating protein 30
1556737_at	0.0117731	0.000176	-5.35	1.07612	-4.36	LINC00671	long intergenic non-protein coding RNA 671
229415_at	0.0118221	0.000177	-5.35	1.07084	-1.98	CYCS	cytochrome c, somatic
233882_s_at	0.0118258	0.000177	-5.35	1.06933	-4.15	SEMA6D	semaphorin 6D
221097_s_at	0.011897	0.000178	-5.34	1.06225	-2.79	KCNMB2	potassium calcium-activated channel subfamily M regulatory beta subunit 2
229446_at	0.011927	0.000179	-5.34	1.058	-2.28	LOC101929977	uncharacterized LOC101929977
218802_at	0.011927	0.000179	5.34	1.05727	1.84	MCUB	mitochondrial calcium uniporter dominant negative beta subunit
206876_at	0.011927	0.000179	-5.34	1.05579	-5.58	SIM1	single-minded family bHLH transcription factor 1
220709_at	0.011927	0.00018	-5.34	1.05356	-1.98	ZNF556	zinc finger protein 556
217640_x_at	0.011927	0.00018	5.34	1.05262	3.02	SKA1	spindle and kinetochore associated complex subunit 1
204745_x_at	0.0119343	0.00018	-5.34	1.05083	-2.86	MT1G	metallothionein 1G
216641_s_at	0.0120278	0.000182	-5.33	1.04199	-3.42	LAD1	ladinin 1
205102_at	0.01203	0.000182	-5.33	1.04062	-3.17	TMPRSS2	transmembrane protease, serine 2
219689_at	0.0120627	0.000183	-5.33	1.03678	-3.19	SEMA3G	semaphorin 3G
220059_at	0.0121538	0.000185	-5.32	1.02821	-3	STAP1	signal transducing adaptor family member 1
1552813_at	0.0122232	0.000186	-5.32	1.02132	-2.61	KLF14	Kruppel like factor 14
216452_at	0.0122232	0.000186	-5.32	1.02027	-2.26	TRPM3	transient receptor potential cation channel subfamily M member 3
209740_s_at	0.0123086	0.000188	-5.31	1.01196	-1.85	PNPLA4	patatin like phospholipase domain containing 4
211919_s_at	0.0123086	0.000188	5.31	1.01022	1.99	CXCR4	C-X-C motif chemokine receptor 4
226372_at	0.0123086	0.000188	5.31	1.00991	3.68	CHST11	carbohydrate (chondroitin 4) sulfotransferase 11
237250_at	0.012343	0.000189	-5.31	1.006	-5.35	GABRA2	gamma-aminobutyric acid type A receptor alpha2 subunit
232128_s_at	0.0123534	0.000189	-5.31	1.00399	-2.07	CLCN5	chloride voltage-gated channel 5
203642_s_at	0.0123829	0.00019	-5.3	1.00048	-2.87	COBLL1	cordon-bleu WH2 repeat protein like 1
225306_s_at	0.0124315	0.000191	-5.3	0.99464	-2.19	SLC25A29	solute carrier family 25 member 29
215126_at	0.0124315	0.000191	-5.3	0.993792	-2.76	LINC01314	long intergenic non-protein coding RNA 1314
1556199_a_at	0.0124315	0.000191	-5.3	0.992544	-3.24	RGS9BP	regulator of G-protein signaling 9 binding protein
237799_at	0.0125333	0.000193	-5.29	0.982555	-4.96	SLC22A12	solute carrier family 22 member 12
222603_at	0.0125333	0.000193	-5.29	0.981647	-2.26	ERMP1	endoplasmic reticulum metallopeptidase 1
219432_at	0.0125755	0.000194	-5.29	0.977187	-2.16	EVC	EvC ciliary complex subunit 1
232567_at	0.0125853	0.000195	-5.29	0.974982	-2.19	PRR5-ARHGAP8///ARHGAP8	PRR5-ARHGAP8 readthrough///Rho GTPase activating protein 8
215300_s_at	0.0125853	0.000195	-5.29	0.974101	-3.96	FMO5	flavin containing monooxygenase 5
226829_at	0.0126476	0.000196	-5.28	0.968096	-1.88	AFAP1L2	actin filament associated protein 1 like 2
220910_at	0.0126787	0.000197	-5.28	0.963813	-2.01	FRAS1	Fraser extracellular matrix complex subunit 1
220524_at	0.0126787	0.000197	-5.28	0.963379	-3.11	EPB41L4B	erythrocyte membrane protein band 4.1 like 4B
1568768_s_at	0.0127275	0.000198	-5.28	0.958347	-2.75	BRE-AS1	BRE antisense RNA 1
204719_at	0.0127275	0.000198	-5.28	0.957296	-4.2	ABCA8	ATP binding cassette subfamily A member 8
203394_s_at	0.0127486	0.000199	-5.28	0.954523	-2.6	HES1	hes family bHLH transcription factor 1
235141_at	0.0127576	0.000199	-5.27	0.951631	-2.49	MARVELD2	MARVEL domain containing 2
240913_at	0.0127576	0.0002	-5.27	0.95153	-2.93	FGFR2	fibroblast growth factor receptor 2
243901_at	0.0127915	0.000201	-5.27	0.946633	-3.48	ALDOB	aldolase, fructose-bisphosphate B
1553613_s_at	0.0129852	0.000204	-5.26	0.930739	-3.25	FOXC1	forkhead box C1
207705_s_at	0.0129972	0.000204	-5.26	0.928012	-1.83	NINL	ninein like
1569688_at	0.0129972	0.000204	-5.26	0.927551	-2.95	FMO5	flavin containing monooxygenase 5
222932_at	0.0130586	0.000206	-5.25	0.921783	-2.05	EHF	ETS homologous factor
219850_s_at	0.013062	0.000206	-5.25	0.920393	-4.96	EHF	ETS homologous factor
216953_s_at	0.0131106	0.000207	-5.25	0.915604	-3.73	WT1	Wilms tumor 1
218658_s_at	0.0131499	0.000208	-5.25	0.911119	-1.76	ACTR8	ARP8 actin-related protein 8 homolog
213965_s_at	0.0131499	0.000208	-5.25	0.910396	-3.03	CHD5	chromodomain helicase DNA binding protein 5
226030_at	0.0131718	0.000209	-5.25	0.907633	-2.12	ACADSB	acyl-CoA dehydrogenase, short/branched chain
226610_at	0.013175	0.000209	-5.24	0.90626	-4.11	CENPV	centromere protein V
209560_s_at	0.0131752	0.000209	-5.24	0.904917	-2.18	DLK1	delta like non-canonical Notch ligand 1
1555758_a_at	0.0131752	0.000209	5.24	0.903987	2.19	CDKN3	cyclin dependent kinase inhibitor 3
223427_s_at	0.0132094	0.00021	-5.24	0.900312	-2.72	EPB41L4B	erythrocyte membrane protein band 4.1 like 4B
227664_at	0.0132218	0.000211	-5.24	0.898261	-2.55	FLJ37453	uncharacterized LOC729614
223185_s_at	0.0132221	0.000211	5.24	0.895992	2.83	BHLHE41	basic helix-loop-helix family member e41
230585_at	0.0132275	0.000212	-5.24	0.894202	-3.24	KCNJ15	potassium voltage-gated channel subfamily J member 15
205199_at	0.0132275	0.000212	5.24	0.892369	2.88	CA9	carbonic anhydrase 9
230781_at	0.0132275	0.000212	-5.24	0.892222	-2.86	LINC01088	long intergenic non-protein coding RNA 1088
207007_at	0.0132612	0.000213	-5.23	0.888599	-3.25	NR1I3	nuclear receptor subfamily 1 group I member 3
214424_s_at	0.0132654	0.000213	-5.23	0.886316	-3.64	ALDOB	aldolase, fructose-bisphosphate B
222087_at	0.0132654	0.000213	5.23	0.886053	3.63	MIR1204///PVT1	microRNA 1204///Pvt1 oncogene (non-protein coding)
205331_s_at	0.0133052	0.000214	-5.23	0.882003	-3.27	REEP2	receptor accessory protein 2
206303_s_at	0.0133426	0.000215	-5.23	0.87748	-1.97	NUDT4P1///NUDT4P2///NUDT4	nudix hydrolase 4 pseudogene 1///nudix hydrolase 4 pseudogene 2///nudix hydrolase 4
228880_at	0.0133426	0.000215	-5.23	0.877012	-2.06	NAT8L	N-acetyltransferase 8 like
1566916_at	0.0133847	0.000216	-5.22	0.872809	-3.01	HPYR1	Helicobacter pylori responsive 1 (non-protein coding)
228214_at	0.0134614	0.000218	-5.22	0.864983	-1.75	SOX6	SRY-box 6
1560676_at	0.0134977	0.000219	-5.22	0.859359	-2.84	SIAH3	siah E3 ubiquitin protein ligase family member 3
212613_at	0.0134977	0.000219	5.22	0.858724	1.75	BTN3A2	butyrophilin subfamily 3 member A2
211708_s_at	0.0134977	0.000219	5.21	0.857912	3.86	SCD	stearoyl-CoA desaturase
206676_at	0.013514	0.00022	-5.21	0.855619	-3.09	CEACAM8	carcinoembryonic antigen related cell adhesion molecule 8
214602_at	0.0135719	0.000221	-5.21	0.849224	-2.67	COL4A4	collagen type IV alpha 4 chain
203968_s_at	0.0135993	0.000222	5.21	0.846139	2.21	CDC6	cell division cycle 6
1556209_at	0.0136577	0.000223	5.2	0.840836	3.73	CLEC2B	C-type lectin domain family 2 member B
206417_at	0.0136906	0.000224	-5.2	0.836281	-2.13	CNGA1	cyclic nucleotide gated channel alpha 1
237334_at	0.0137719	0.000226	-5.2	0.829119	-2.04	SFXN2	sideroflexin 2
209047_at	0.0137719	0.000226	-5.2	0.828279	-4.69	AQP1	aquaporin 1 (Colton blood group)
221884_at	0.013779	0.000227	-5.2	0.826161	-2.84	MECOM	MDS1 and EVI1 complex locus
216834_at	0.013779	0.000227	5.19	0.825588	3.96	RGS1	regulator of G-protein signaling 1
238451_at	0.0138093	0.000228	-5.19	0.822338	-2.8	MPP7	membrane palmitoylated protein 7
217421_at	0.0138649	0.000229	-5.19	0.817308	-2.27	PIWIL2	piwi like RNA-mediated gene silencing 2
204561_x_at	0.0138829	0.000229	5.19	0.81433	3.4	APOC4-APOC2///APOC4///APOC2	APOC4-APOC2 readthrough (NMD candidate)///apolipoprotein C4///apolipoprotein C2
213362_at	0.0138829	0.00023	-5.19	0.813855	-4.04	PTPRD	protein tyrosine phosphatase, receptor type D
207597_at	0.0139901	0.000232	5.18	0.802006	2.01	ADAM18	ADAM metallopeptidase domain 18
232531_at	0.0139901	0.000232	-5.18	0.801966	-2.17	EMX2OS	EMX2 opposite strand/antisense RNA
233500_x_at	0.0140431	0.000233	5.18	0.797171	3.05	CLEC2D	C-type lectin domain family 2 member D
208161_s_at	0.014058	0.000234	5.18	0.79505	2.59	ABCC3	ATP binding cassette subfamily C member 3
1560992_at	0.0141093	0.000235	5.17	0.789319	3.43	LOC400590	uncharacterized LOC400590
236932_s_at	0.0141201	0.000236	-5.17	0.787489	-2.53	GATAD2A	GATA zinc finger domain containing 2A
219866_at	0.0141333	0.000236	-5.17	0.785502	-3.24	CLIC5	chloride intracellular channel 5
201905_s_at	0.0141587	0.000237	-5.17	0.780519	-2.28	CTDSPL	CTD small phosphatase like
244011_at	0.0141642	0.000238	-5.17	0.778633	-1.8	PPM1K	protein phosphatase, Mg2+/Mn2+ dependent 1K
1555112_a_at	0.0141642	0.000238	-5.17	0.778001	-2.97	CCDC181	coiled-coil domain containing 181
1553491_at	0.0141688	0.000238	-5.16	0.776609	-1.73	KSR2	kinase suppressor of ras 2
218883_s_at	0.0141846	0.000239	5.16	0.774451	1.97	CENPU	centromere protein U
214417_s_at	0.0142219	0.00024	-5.16	0.770802	-1.66	FETUB	fetuin B
219389_at	0.0142279	0.00024	-5.16	0.768216	-4.21	SUSD4	sushi domain containing 4
218744_s_at	0.0142279	0.000241	-5.16	0.766667	-3.1	PACSIN3	protein kinase C and casein kinase substrate in neurons 3
210831_s_at	0.0142279	0.000241	-5.16	0.765425	-2.51	PTGER3	prostaglandin E receptor 3
218789_s_at	0.0142279	0.000241	-5.16	0.765058	-2.1	C11orf71	chromosome 11 open reading frame 71
217845_x_at	0.0142279	0.000241	-5.16	0.764022	-1.7	HIGD1A	HIG1 hypoxia inducible domain family member 1A
1563707_at	0.0142413	0.000242	-5.16	0.762035	-1.69	LOC105369748	uncharacterized LOC105369748
210327_s_at	0.0142422	0.000243	-5.15	0.759866	-4.26	AGXT	alanine-glyoxylate aminotransferase
234948_at	0.0142448	0.000243	-5.15	0.75863	-2.25	SLC27A5	solute carrier family 27 member 5
203860_at	0.0142884	0.000244	-5.15	0.754575	-1.83	PCCA	propionyl-CoA carboxylase alpha subunit
1557669_at	0.0142952	0.000244	-5.15	0.753054	-2.54	LOC100132005	uncharacterized LOC100132005
1558487_a_at	0.0143823	0.000246	-5.15	0.746036	-1.73	TMED4	transmembrane p24 trafficking protein 4
1558533_at	0.0143921	0.000247	-5.14	0.74308	-1.95	KRBA2	KRAB-A domain containing 2
222272_x_at	0.0143921	0.000247	-5.14	0.742533	-2.24	SCIN	scinderin
205473_at	0.0143921	0.000247	-5.14	0.7418	-6.11	ATP6V1B1	ATPase H+ transporting V1 subunit B1
202387_at	0.0143921	0.000247	-5.14	0.741175	-1.92	BAG1	BCL2 associated athanogene 1
227194_at	0.0144113	0.000248	-5.14	0.738821	-5.35	FAM3B	family with sequence similarity 3 member B
216898_s_at	0.014424	0.000249	-5.14	0.735269	-2.43	COL4A3	collagen type IV alpha 3 chain
220276_at	0.014424	0.000249	-5.14	0.733724	-4.39	RERGL	RERG like
225759_x_at	0.014424	0.000249	-5.14	0.732376	-2	CLMN	calmin
235609_at	0.014424	0.000249	5.14	0.732326	3.12	BRIP1	BRCA1 interacting protein C-terminal helicase 1
238136_at	0.014424	0.000249	-5.14	0.73202	-1.94	SHISA7	shisa family member 7
214095_at	0.014424	0.00025	5.14	0.73055	2.03	SHMT2	serine hydroxymethyltransferase 2
217661_x_at	0.014424	0.00025	-5.14	0.730399	-2.41	SIX5	SIX homeobox 5
233688_at	0.014424	0.00025	-5.14	0.729266	-3.1	KCNIP3	potassium voltage-gated channel interacting protein 3
244289_at	0.014424	0.00025	-5.13	0.72857	-3.06	ZNF300P1	zinc finger protein 300 pseudogene 1
235672_at	0.014424	0.000251	-5.13	0.72694	-2.87	MAP6	microtubule associated protein 6
1559506_x_at	0.014424	0.000251	-5.13	0.726528	-3.38	MIR2682///MIR137///MIR137HG	microRNA 2682///microRNA 137///MIR137 host gene
203484_at	0.0144372	0.000252	5.13	0.724085	1.85	SEC61G	Sec61 translocon gamma subunit
1557256_a_at	0.0144372	0.000252	-5.13	0.723566	-3.35	GABRB1	gamma-aminobutyric acid type A receptor beta1 subunit
243764_at	0.0144406	0.000252	5.13	0.722306	3.04	VSIG1	V-set and immunoglobulin domain containing 1
243945_at	0.0144582	0.000253	-5.13	0.720083	-2.06	TRIM2	tripartite motif containing 2
1559051_s_at	0.0144783	0.000253	5.13	0.717687	1.95	MB21D1	Mab-21 domain containing 1
1570433_at	0.0144818	0.000254	-5.13	0.715665	-2.54	TMPRSS2	transmembrane protease, serine 2
228069_at	0.0144818	0.000254	5.13	0.715398	1.73	MTFR2	mitochondrial fission regulator 2
226420_at	0.0144854	0.000254	-5.13	0.713306	-2.61	MECOM	MDS1 and EVI1 complex locus
208388_at	0.0144854	0.000254	-5.13	0.713106	-2.33	NR2E3	nuclear receptor subfamily 2 group E member 3
222774_s_at	0.0146047	0.000257	5.12	0.703003	3.31	NETO2	neuropilin and tolloid like 2
202990_at	0.014679	0.000259	5.12	0.697001	1.91	PYGL	phosphorylase, glycogen, liver
204304_s_at	0.0147132	0.00026	-5.11	0.692784	-4.78	PROM1	prominin 1
231517_at	0.0147132	0.00026	-5.11	0.69203	-3.21	ZYG11A	zyg-11 family member A, cell cycle regulator
235825_at	0.0147132	0.00026	-5.11	0.691655	-2.14	LOC101927330	uncharacterized LOC101927330
206754_s_at	0.0147254	0.00026	-5.11	0.689825	-3.5	CYP2B7P///CYP2B6	cytochrome P450 family 2 subfamily B member 7, pseudogene///cytochrome P450 family 2 subfamily B member 6
204122_at	0.0148007	0.000262	5.11	0.682317	2.03	TYROBP	TYRO protein tyrosine kinase binding protein
224941_at	0.0148007	0.000263	-5.11	0.68177	-2.76	PAPPA	pappalysin 1
216828_at	0.0148674	0.000264	-5.1	0.675366	-1.8	LOC100505874///MLLT10P1	uncharacterized LOC100505874///myeloid/lymphoid or mixed-lineage leukemia; translocated to, 10 pseudogene 1
219277_s_at	0.0148674	0.000264	-5.1	0.675107	-2.92	OGDHL	oxoglutarate dehydrogenase-like
204279_at	0.0148674	0.000265	5.1	0.674323	1.91	PSMB9	proteasome subunit beta 9
207908_at	0.0148897	0.000265	-5.1	0.671837	-2.01	KRT2	keratin 2
219054_at	0.0148955	0.000266	-5.1	0.670446	-3.08	NPR3	natriuretic peptide receptor 3
213824_at	0.0148969	0.000266	-5.1	0.667689	-3.34	OLIG2	oligodendrocyte lineage transcription factor 2
204284_at	0.0148969	0.000266	5.1	0.667258	2.03	PPP1R3C	protein phosphatase 1 regulatory subunit 3C
224942_at	0.0148969	0.000267	-5.1	0.665995	-2.13	PAPPA	pappalysin 1
209212_s_at	0.0148969	0.000267	-5.1	0.665971	-2.72	KLF5	Kruppel like factor 5
201506_at	0.0148969	0.000267	5.1	0.66533	3.18	TGFBI	transforming growth factor beta induced
215834_x_at	0.0149303	0.000268	5.09	0.66213	2.99	SCARB1	scavenger receptor class B member 1
238572_at	0.0149659	0.000269	-5.09	0.65879	-2.45	STK16	serine/threonine kinase 16
215943_at	0.0150148	0.00027	-5.09	0.654487	-2.82	KIAA1661	KIAA1661 protein
231916_at	0.0150201	0.000271	-5.09	0.652241	-3.17	NOS1	nitric oxide synthase 1
225846_at	0.0150288	0.000271	-5.09	0.650672	-5.09	ESRP1	epithelial splicing regulatory protein 1
227404_s_at	0.0150982	0.000273	-5.08	0.64509	-3.11	EGR1	early growth response 1
214646_at	0.0150982	0.000273	-5.08	0.644156	-2.64	HIST1H3F///HIST1H3B///HIST1H3H///HIST1H3J///HIST1H3G///HIST1H3I///HIST1H3E///HIST1H3C///HIST1H3D///HIST1H3A	histone cluster 1, H3f///histone cluster 1, H3b///histone cluster 1, H3h///histone cluster 1, H3j///histone cluster 1, H3g///histone cluster 1, H3i///histone cluster 1, H3e///histone cluster 1, H3c///histone cluster 1, H3d///histone cluster 1, H3a
231459_at	0.0151517	0.000274	-5.08	0.638756	-2.38	LOC101927839	uncharacterized LOC101927839
226649_at	0.0151517	0.000274	-5.08	0.638693	-2.24	PANK1	pantothenate kinase 1
1554899_s_at	0.0152007	0.000276	5.08	0.633968	3.02	FCER1G	Fc fragment of IgE receptor Ig
1560330_at	0.0152007	0.000276	-5.08	0.633537	-3.08	PCDH15	protocadherin related 15
210982_s_at	0.0152213	0.000276	5.07	0.631218	1.76	HLA-DRA	major histocompatibility complex, class II, DR alpha
1554805_at	0.0152239	0.000277	-5.07	0.629122	-1.96	CLDN19	claudin 19
208006_at	0.0152239	0.000277	-5.07	0.62833	-2.98	FOXI1	forkhead box I1
206836_at	0.0152239	0.000277	5.07	0.628084	2.53	SLC6A3	solute carrier family 6 member 3
239093_at	0.0152247	0.000278	-5.07	0.627046	-3.14	HOGA1	4-hydroxy-2-oxoglutarate aldolase 1
226625_at	0.01526	0.000279	-5.07	0.623016	-1.84	TGFBR3	transforming growth factor beta receptor 3
231930_at	0.01526	0.000279	-5.07	0.622695	-3.61	LOC643923///ELMOD1	uncharacterized LOC643923///ELMO domain containing 1
213629_x_at	0.01526	0.000279	-5.07	0.621818	-2.63	MT1F	metallothionein 1F
212148_at	0.0152655	0.000279	-5.07	0.620484	-3.18	PBX1	PBX homeobox 1
205153_s_at	0.0152724	0.00028	5.07	0.619057	2.42	CD40	CD40 molecule
211023_at	0.0152975	0.000281	-5.07	0.616348	-1.62	PDHB	pyruvate dehydrogenase (lipoamide) beta
205568_at	0.0152975	0.000281	5.07	0.615275	4.17	AQP9	aquaporin 9
205617_at	0.0152975	0.000282	-5.06	0.612966	-2.97	PRRG2	proline rich and Gla domain 2
1559670_at	0.0152975	0.000282	-5.06	0.61257	-2.26	LOC100506489	uncharacterized LOC100506489
209173_at	0.0152975	0.000282	-5.06	0.612552	-4.44	AGR2	anterior gradient 2, protein disulphide isomerase family member
1552903_at	0.0153415	0.000283	-5.06	0.608757	-2.31	B4GALNT2	beta-1,4-N-acetyl-galactosaminyltransferase 2
226614_s_at	0.0153537	0.000283	-5.06	0.607	-1.97	FAM167A	family with sequence similarity 167 member A
212067_s_at	0.0154329	0.000285	5.06	0.600356	2.21	C1R	complement C1r subcomponent
212915_at	0.0154329	0.000285	-5.06	0.599995	-2.46	PDZRN3	PDZ domain containing ring finger 3
238805_at	0.0155378	0.000288	-5.05	0.590476	-1.97	HSPB2-C11orf52///C11orf52///HSPB2	HSPB2-C11orf52 readthrough (NMD candidate)///chromosome 11 open reading frame 52///heat shock protein family B (small) member 2
202705_at	0.0155378	0.000288	5.05	0.589744	3.07	CCNB2	cyclin B2
215807_s_at	0.0155378	0.000289	-5.05	0.588594	-3.37	PLXNB1	plexin B1
242697_at	0.0155378	0.000289	-5.05	0.587873	-2.68	ZNF540	zinc finger protein 540
205856_at	0.0155378	0.000289	-5.05	0.58731	-5.03	SLC14A1	solute carrier family 14 member 1 (Kidd blood group)
207109_at	0.015609	0.000291	-5.04	0.5811	-2.56	POU2F3	POU class 2 homeobox 3
209291_at	0.0156192	0.000291	-5.04	0.579368	-2.89	ID4	inhibitor of DNA binding 4, HLH protein
231352_at	0.0156192	0.000292	-5.04	0.578532	-5.29	SLC22A8	solute carrier family 22 member 8
210984_x_at	0.0156575	0.000293	5.04	0.574737	3.99	EGFR	epidermal growth factor receptor
1554018_at	0.0156575	0.000293	5.04	0.574202	2.38	GPNMB	glycoprotein nmb
227868_at	0.0156986	0.000294	5.04	0.569707	1.71	LOC154761	family with sequence similarity 115, member C pseudogene
217553_at	0.0158829	0.000298	5.03	0.557277	2.65	STEAP1B	STEAP family member 1B
227449_at	0.0158888	0.000298	-5.03	0.555952	-2.12	EPHA4	EPH receptor A4
231319_x_at	0.0159041	0.000299	-5.03	0.554055	-1.68	KIF9	kinesin family member 9
236150_at	0.0159401	0.0003	-5.03	0.550872	-2.34	HYKK	hydroxylysine kinase
224139_at	0.0160086	0.000302	-5.02	0.545704	-2.72	SHANK2-AS3	SHANK2 antisense RNA 3
216928_at	0.0160117	0.000302	-5.02	0.544563	-2.94	TAL1	TAL bHLH transcription factor 1, erythroid differentiation factor
1558121_at	0.0160465	0.000303	-5.02	0.541471	-2.39	CSRNP3	cysteine and serine rich nuclear protein 3
229720_at	0.0161348	0.000305	-5.02	0.533997	-1.97	BAG1	BCL2 associated athanogene 1
229057_at	0.0161348	0.000306	-5.01	0.531885	-5.37	SCN2A	sodium voltage-gated channel alpha subunit 2
232361_s_at	0.0161348	0.000306	-5.01	0.531135	-4.65	EHF	ETS homologous factor
213975_s_at	0.0161348	0.000306	5.01	0.530977	2.95	LYZ	lysozyme
205769_at	0.0161348	0.000306	-5.01	0.530458	-3.17	SLC27A2	solute carrier family 27 member 2
239304_at	0.0161348	0.000306	-5.01	0.530379	-2.27	MFSD4A	major facilitator superfamily domain containing 4A
1562659_at	0.0161633	0.000308	-5.01	0.525982	-2.27	LOC400548	uncharacterized LOC400548
234583_at	0.0161633	0.000308	-5.01	0.523923	-3.32	CHL1	cell adhesion molecule L1 like
204260_at	0.0161633	0.000309	-5.01	0.523272	-3.37	CHGB	chromogranin B
1552335_at	0.0161633	0.000309	5.01	0.522607	2.46	CATSPER1	cation channel sperm associated 1
216623_x_at	0.0161633	0.000309	-5.01	0.521563	-4.9	TOX3	TOX high mobility group box family member 3
1563462_at	0.0161633	0.000309	-5.01	0.521508	-3.74	LINC01091	long intergenic non-protein coding RNA 1091
1564027_a_at	0.0161633	0.000309	5.01	0.521381	1.81	LOC101928422///TCAF2P1///TCAF2	TRPM8 channel-associated factor 2-like///TRPM8 channel associated factor 2 pseudogene 1///TRPM8 channel associated factor 2
241866_at	0.0161633	0.000309	-5.01	0.521102	-2.07	SLC16A7	solute carrier family 16 member 7
1561602_at	0.0161642	0.00031	-5.01	0.520104	-2.04	LOC100129476	uncharacterized LOC100129476
228943_at	0.0161785	0.00031	-5.01	0.518296	-3.53	MAP6	microtubule associated protein 6
209201_x_at	0.0161935	0.000311	5	0.516451	1.82	CXCR4	C-X-C motif chemokine receptor 4
219745_at	0.0162234	0.000312	5	0.513691	2	MFSD13A	major facilitator superfamily domain containing 13A
237188_x_at	0.0162234	0.000312	-5	0.512766	-1.87	SUN5	Sad1 and UNC84 domain containing 5
1564494_s_at	0.0162633	0.000313	5	0.509012	2.6	P4HB	prolyl 4-hydroxylase subunit beta
224999_at	0.0162633	0.000313	5	0.508177	2.32	EGFR	epidermal growth factor receptor
204154_at	0.0162633	0.000314	-5	0.507547	-2.87	CDO1	cysteine dioxygenase type 1
232422_at	0.0163331	0.000315	-5	0.502404	-2.73	GGACT	gamma-glutamylamine cyclotransferase
226303_at	0.0163534	0.000316	-4.99	0.49973	-2.65	PGM5	phosphoglucomutase 5
212658_at	0.0163534	0.000316	4.99	0.499325	1.84	LHFPL2	lipoma HMGIC fusion partner-like 2
228133_s_at	0.0163539	0.000317	-4.99	0.497328	-2.44	MYH11	myosin heavy chain 11
211778_s_at	0.0164663	0.00032	-4.99	0.488848	-1.91	OVOL2	ovo like zinc finger 2
219436_s_at	0.0165063	0.000321	-4.99	0.485534	-4.28	EMCN	endomucin
211767_at	0.0165286	0.000321	4.98	0.483285	2.31	GINS4	GINS complex subunit 4
227702_at	0.0165316	0.000322	-4.98	0.482183	-2.68	CYP4X1	cytochrome P450 family 4 subfamily X member 1
209466_x_at	0.016533	0.000322	-4.98	0.480248	-1.96	PTN	pleiotrophin
231358_at	0.0165801	0.000324	-4.98	0.47653	-3	MRO	maestro
231925_at	0.0166743	0.000326	4.98	0.468499	4.02	P2RY1	purinergic receptor P2Y1
1559917_a_at	0.0166743	0.000327	-4.97	0.467285	-2.83	CBR3-AS1	CBR3 antisense RNA 1
235371_at	0.01673	0.000328	4.97	0.46309	2.55	GXYLT2	glucoside xylosyltransferase 2
1555216_a_at	0.0167458	0.000329	-4.97	0.460347	-2.18	LOC101060604///SLC7A5P2///SLC7A5P1	putative L-type amino acid transporter 1-like protein IMAA///solute carrier family 7 member 5 pseudogene 2///solute carrier family 7 member 5 pseudogene 1
203797_at	0.0167458	0.000329	-4.97	0.460325	-1.99	VSNL1	visinin like 1
238566_at	0.0169123	0.000333	-4.96	0.448724	-1.87	ZNF334	zinc finger protein 334
226647_at	0.0169123	0.000333	-4.96	0.448259	-2.46	TMEM25	transmembrane protein 25
228729_at	0.0169245	0.000334	4.96	0.446237	1.6	CCNB1	cyclin B1
210587_at	0.0169249	0.000334	4.96	0.444927	4.21	INHBE	inhibin beta E subunit
214261_s_at	0.0169249	0.000334	-4.96	0.444389	-4.44	ADH6	alcohol dehydrogenase 6 (class V)
204687_at	0.0169344	0.000335	-4.96	0.442928	-1.95	PARM1	prostate androgen-regulated mucin-like protein 1
235741_at	0.0169606	0.000336	-4.96	0.440501	-1.98	PPIA	peptidylprolyl isomerase A
203387_s_at	0.0169623	0.000336	-4.96	0.439492	-2.35	TBC1D4	TBC1 domain family member 4
229391_s_at	0.0169659	0.000336	4.96	0.438212	2.59	FAM26F	family with sequence similarity 26 member F
229729_at	0.0169659	0.000338	-4.96	0.434556	-2.23	TMEM8B	transmembrane protein 8B
237123_x_at	0.0169659	0.000338	-4.95	0.434519	-2.19	KLHL9	kelch like family member 9
207930_at	0.0169659	0.000338	-4.95	0.434166	-2.91	LCN1	lipocalin 1
1557022_at	0.0169659	0.000338	-4.95	0.43402	-2.77	MIR4300HG	MIR4300 host gene
231751_at	0.0169659	0.000338	-4.95	0.433849	-2.59	ABCG8	ATP binding cassette subfamily G member 8
220543_at	0.0170316	0.00034	-4.95	0.427929	-2.97	C21orf62	chromosome 21 open reading frame 62
209360_s_at	0.0170316	0.00034	4.95	0.427338	2.64	LOC101928269///LOC100506403///RUNX1	uncharacterized LOC101928269///uncharacterized LOC100506403///runt related transcription factor 1
210082_at	0.0170316	0.00034	-4.95	0.426875	-1.87	ABCA4	ATP binding cassette subfamily A member 4
208868_s_at	0.0170316	0.00034	-4.95	0.426447	-1.71	GABARAPL1	GABA type A receptor associated protein like 1
1553413_at	0.0171867	0.000344	-4.94	0.414983	-2.86	LCAL1	lung cancer associated lncRNA 1
204822_at	0.0171867	0.000345	4.94	0.414006	2.29	TTK	TTK protein kinase
209925_at	0.0171867	0.000345	-4.94	0.41394	-2.7	OCLN	occludin
224870_at	0.0172714	0.000347	-4.94	0.408027	-2.15	DANCR	differentiation antagonizing non-protein coding RNA
242226_at	0.0172714	0.000347	-4.94	0.407316	-2.81	GS1-279B7.1	microtubule associated protein 1 light chain 3 beta pseudogene
1555756_a_at	0.0173075	0.000348	4.94	0.403588	2.78	CLEC7A	C-type lectin domain family 7 member A
227862_at	0.0173075	0.000349	-4.93	0.401509	-2.05	TRNP1	TMF1-regulated nuclear protein 1
225911_at	0.0173075	0.000349	-4.93	0.40125	-2.99	NPNT	nephronectin
242517_at	0.0173075	0.00035	4.93	0.40003	5.04	KISS1R	KISS1 receptor
1555203_s_at	0.0173075	0.00035	-4.93	0.399912	-3.27	SLC44A4	solute carrier family 44 member 4
226974_at	0.0173181	0.00035	-4.93	0.398415	-2.14	NEDD4L	neural precursor cell expressed, developmentally down-regulated 4-like, E3 ubiquitin protein ligase
240042_at	0.017329	0.000351	-4.93	0.396911	-2.09	FIBCD1	fibrinogen C domain containing 1
215646_s_at	0.0175063	0.000355	4.93	0.385124	3.08	VCAN	versican
230956_at	0.0175155	0.000356	-4.92	0.383721	-3.03	COLCA1	colorectal cancer associated 1
1555728_a_at	0.0175663	0.000357	4.92	0.379988	2.75	MS4A4A	membrane spanning 4-domains A4A
203505_at	0.0176247	0.000359	4.92	0.375314	2.28	ABCA1	ATP binding cassette subfamily A member 1
1554837_a_at	0.0176874	0.000361	-4.92	0.369794	-2.97	CYP4A22///CYP4A11	cytochrome P450 family 4 subfamily A member 22///cytochrome P450 family 4 subfamily A member 11
1554789_a_at	0.0176874	0.000361	-4.92	0.369697	-2.17	PDE8B	phosphodiesterase 8B
211395_x_at	0.0177094	0.000361	4.91	0.367595	1.9	FCGR2C	Fc fragment of IgG receptor IIc (gene/pseudogene)
232067_at	0.0177261	0.000363	-4.91	0.364027	-3.44	FAXC	failed axon connections homolog
229463_at	0.0177298	0.000363	-4.91	0.362944	-2.54	NTRK2	neurotrophic receptor tyrosine kinase 2
201525_at	0.0177318	0.000364	-4.91	0.361956	-3.25	APOD	apolipoprotein D
203324_s_at	0.0177494	0.000364	4.91	0.360105	2.35	CAV2	caveolin 2
201954_at	0.0177983	0.000366	4.91	0.355482	2.11	ARPC1B	actin related protein 2/3 complex subunit 1B
205608_s_at	0.0177983	0.000366	-4.91	0.354792	-2	ANGPT1	angiopoietin 1
1552448_a_at	0.017958	0.00037	-4.9	0.344242	-3.09	FAM167A-AS1	FAM167A antisense RNA 1
211548_s_at	0.0180049	0.000371	-4.9	0.340806	-3.56	HPGD	hydroxyprostaglandin dehydrogenase 15-(NAD)
207544_s_at	0.0180496	0.000373	-4.9	0.337493	-3.99	ADH6	alcohol dehydrogenase 6 (class V)
234635_at	0.0180531	0.000373	-4.9	0.335996	-3.08	KRTAP4-1	keratin associated protein 4-1
220333_at	0.0180531	0.000373	-4.9	0.335562	-2.36	PAQR5	progestin and adipoQ receptor family member 5
219402_s_at	0.0180759	0.000374	4.89	0.333453	2.41	DERL1	derlin 1
1556469_s_at	0.0181016	0.000375	-4.89	0.331091	-2.11	LOC105376166	uncharacterized LOC105376166
228752_at	0.0181016	0.000375	4.89	0.330318	2.44	CRACR2A	calcium release activated channel regulator 2A
216074_x_at	0.0181127	0.000376	-4.89	0.328226	-2.24	WWC1	WW and C2 domain containing 1
211125_x_at	0.0181127	0.000376	-4.89	0.327983	-1.84	GRIN1	glutamate ionotropic receptor NMDA type subunit 1
225057_at	0.0181169	0.000377	4.89	0.326319	2.51	SLC15A4	solute carrier family 15 member 4
202855_s_at	0.0181169	0.000378	4.89	0.324474	2.75	MIR6787///SLC16A3	microRNA 6787///solute carrier family 16 member 3
1556097_at	0.0181169	0.000378	-4.89	0.324393	-2.04	HOMER2	homer scaffolding protein 2
242546_at	0.0181169	0.000378	4.89	0.324297	2.68	LINC01296///DUXAP10	long intergenic non-protein coding RNA 1296///double homeobox A pseudogene 10
234831_at	0.0181243	0.000378	-4.89	0.32297	-2.55	LOC101929164	uncharacterized LOC101929164
1559927_a_at	0.0181243	0.000379	-4.89	0.322117	-2.56	LOC728353	uncharacterized LOC728353
206171_at	0.0181448	0.00038	4.88	0.318267	2.4	ADORA3	adenosine A3 receptor
244565_at	0.0181448	0.00038	-4.88	0.317903	-2.18	HMX2	H6 family homeobox 2
220503_at	0.0181758	0.000382	-4.88	0.314377	-7	SLC13A1	solute carrier family 13 member 1
201982_s_at	0.0181758	0.000382	-4.88	0.312478	-1.98	PAPPA	pappalysin 1
235733_at	0.0181758	0.000383	4.88	0.311169	2.26	GXYLT2	glucoside xylosyltransferase 2
239964_at	0.0181758	0.000383	-4.88	0.310745	-3.12	TCL6	T-cell leukemia/lymphoma 6 (non-protein coding)
228716_at	0.0181758	0.000383	-4.88	0.309869	-3.13	THRB	thyroid hormone receptor beta
220727_at	0.0181938	0.000385	-4.88	0.305461	-2.86	KCNK10	potassium two pore domain channel subfamily K member 10
211571_s_at	0.0181938	0.000385	4.88	0.305015	2.71	VCAN	versican
239210_at	0.0181938	0.000386	-4.87	0.302094	-2.05	LOC102724387	uncharacterized LOC102724387
222731_at	0.0181938	0.000387	-4.87	0.301126	-2.07	ZDHHC2	zinc finger DHHC-type containing 2
1561595_x_at	0.0181938	0.000387	-4.87	0.300683	-3.45	LOC101928238	uncharacterized LOC101928238
220603_s_at	0.0182298	0.000388	4.87	0.297697	2.11	MCTP2	multiple C2 and transmembrane domain containing 2
232411_at	0.0182632	0.000389	-4.87	0.294908	-2.75	KCNJ6	potassium voltage-gated channel subfamily J member 6
203444_s_at	0.0182632	0.00039	-4.87	0.293885	-2.14	MTA2	metastasis associated 1 family member 2
221298_s_at	0.0182632	0.00039	-4.87	0.293106	-6.37	SLC22A8	solute carrier family 22 member 8
205892_s_at	0.0182632	0.00039	-4.87	0.291923	-6.81	FABP1	fatty acid binding protein 1
229647_at	0.0182632	0.000391	-4.87	0.29161	-1.63	NDUFS1	NADH:ubiquinone oxidoreductase core subunit S1
232027_at	0.0182632	0.000391	-4.87	0.290839	-2.84	SYNE1	spectrin repeat containing nuclear envelope protein 1
218481_at	0.0182856	0.000392	4.87	0.288794	1.73	EXOSC5	exosome component 5
209955_s_at	0.0183244	0.000393	4.86	0.285499	2.78	FAP	fibroblast activation protein alpha
223075_s_at	0.0183244	0.000393	-4.86	0.285029	-4.05	AIF1L	allograft inflammatory factor 1 like
222409_at	0.0184463	0.000396	4.86	0.277671	1.54	CORO1C	coronin 1C
242670_at	0.018488	0.000397	4.86	0.274613	3.11	LGI4	leucine rich repeat LGI family member 4
207815_at	0.0185965	0.0004	4.85	0.268019	2.55	PF4V1	platelet factor 4 variant 1
229580_at	0.0186173	0.000401	-4.85	0.265979	-4.91	CLSTN2	calsyntenin 2
205768_s_at	0.0186173	0.000401	-4.85	0.265249	-3.11	SLC27A2	solute carrier family 27 member 2
216638_s_at	0.0186979	0.000404	-4.85	0.259331	-2.7	PRLR	prolactin receptor
213960_at	0.0187522	0.000405	-4.85	0.254658	-4.01	NTRK3	neurotrophic receptor tyrosine kinase 3
206262_at	0.0187522	0.000406	-4.85	0.25398	-4.53	ADH1C	alcohol dehydrogenase 1C (class I), gamma polypeptide
1563679_at	0.0187773	0.000407	-4.84	0.251833	-2.74	LINC01104	long intergenic non-protein coding RNA 1104
203542_s_at	0.0188608	0.00041	-4.84	0.24316	-1.68	KLF9	Kruppel like factor 9
237736_at	0.0188608	0.000411	-4.84	0.242495	-3.81	BSND	barttin CLCNK type accessory beta subunit
224415_s_at	0.0188817	0.000411	-4.84	0.240579	-1.75	HINT2	histidine triad nucleotide binding protein 2
232771_at	0.0188836	0.000412	-4.84	0.239658	-3.65	NRK	Nik related kinase
233504_at	0.0188949	0.000412	-4.84	0.23824	-2.68	C9orf84	chromosome 9 open reading frame 84
239711_at	0.0189124	0.000413	-4.84	0.236505	-1.98	ADAL	adenosine deaminase like
1552766_at	0.0189177	0.000414	-4.83	0.235283	-5.44	HS6ST2	heparan sulfate 6-O-sulfotransferase 2
209448_at	0.0189177	0.000414	4.83	0.234587	1.96	HTATIP2	HIV-1 Tat interactive protein 2
210794_s_at	0.0189222	0.000415	-4.83	0.23288	-2.52	MEG3	maternally expressed 3 (non-protein coding)
216567_at	0.0189222	0.000415	-4.83	0.232708	-2.18	MBP	myelin basic protein
206470_at	0.0189777	0.000416	4.83	0.229004	2.74	PLXNC1	plexin C1
210270_at	0.0190302	0.000418	-4.83	0.224648	-2.31	RGS6	regulator of G-protein signaling 6
240192_at	0.0190567	0.000419	-4.83	0.222047	-4.07	GATA3-AS1	GATA3 antisense RNA 1
215320_at	0.0190567	0.00042	-4.83	0.220724	-2.77	SPATA31C2	SPATA31 subfamily C member 2
244790_at	0.0190567	0.00042	4.83	0.220053	2.63	MTCP1	mature T-cell proliferation 1
202342_s_at	0.0190567	0.00042	-4.83	0.220007	-2.52	TRIM2	tripartite motif containing 2
238996_x_at	0.019176	0.000423	4.82	0.213055	2.05	ALDOA	aldolase, fructose-bisphosphate A
209904_at	0.0191958	0.000424	-4.82	0.211226	-3.08	TNNC1	troponin C1, slow skeletal and cardiac type
1559400_s_at	0.0191972	0.000424	-4.82	0.210338	-3.61	PAPPA	pappalysin 1
230323_s_at	0.0192441	0.000426	-4.82	0.206008	-4.99	TMEM45B	transmembrane protein 45B
243952_at	0.0192441	0.000427	-4.82	0.204012	-2.77	TPTEP1	transmembrane phosphatase with tensin homology pseudogene 1
207677_s_at	0.0192441	0.000427	4.82	0.203872	3.38	NCF4	neutrophil cytosolic factor 4
225655_at	0.0192463	0.000427	4.82	0.20295	2.26	UHRF1	ubiquitin like with PHD and ring finger domains 1
237039_at	0.0192578	0.000428	-4.81	0.201551	-1.75	LOC100130502	uncharacterized LOC100130502
215274_at	0.0193174	0.00043	-4.81	0.197312	-4.02	SLC12A3	solute carrier family 12 member 3
1556012_at	0.0193174	0.00043	-4.81	0.196894	-1.88	KLHDC7A	kelch domain containing 7A
202885_s_at	0.0193863	0.000432	-4.81	0.192584	-2.34	PPP2R1B	protein phosphatase 2 scaffold subunit Abeta
230351_at	0.0193865	0.000432	-4.81	0.191765	-2.25	FGF14-AS2	FGF14 antisense RNA 2
1553299_at	0.0194394	0.000434	4.81	0.188277	2.88	DUSP5P1	dual specificity phosphatase 5 pseudogene 1
219385_at	0.0194539	0.000435	4.8	0.185314	2.38	SLAMF8	SLAM family member 8
223843_at	0.0194539	0.000435	-4.8	0.185128	-3.4	SCARA3	scavenger receptor class A member 3
1552757_s_at	0.0194979	0.000436	-4.8	0.1821	-3.83	C9orf66	chromosome 9 open reading frame 66
217165_x_at	0.0195415	0.000438	-4.8	0.179102	-2.36	MT1F	metallothionein 1F
1569348_at	0.0195472	0.000438	-4.8	0.178012	-1.93	LOC102725451///TPTEP1	uncharacterized LOC102725451///transmembrane phosphatase with tensin homology pseudogene 1
225626_at	0.019559	0.000439	4.8	0.176617	1.71	PAG1	phosphoprotein membrane anchor with glycosphingolipid microdomains 1
220026_at	0.0195711	0.00044	-4.8	0.174804	-3.33	CLCA4	chloride channel accessory 4
241782_at	0.0195711	0.00044	-4.8	0.174405	-2.82	NEBL	nebulette
1553061_at	0.0197223	0.000444	-4.79	0.166034	-2.07	OR6W1P	olfactory receptor family 6 subfamily W member 1 pseudogene
220611_at	0.0197445	0.000445	-4.79	0.164128	-2.78	DAB1	DAB1, reelin adaptor protein
221567_at	0.0197921	0.000447	4.79	0.157933	3.29	NOL3	nucleolar protein 3
226743_at	0.0197921	0.000447	4.79	0.157819	2.55	SLFN11	schlafen family member 11
205164_at	0.0197921	0.000447	-4.79	0.157772	-3.57	GCAT	glycine C-acetyltransferase
223869_at	0.0198912	0.00045	-4.78	0.15158	-5.25	SOST	sclerostin
205681_at	0.0198912	0.000451	4.78	0.149061	4.05	BCL2A1	BCL2 related protein A1
210031_at	0.0198912	0.000451	4.78	0.149034	2.35	CD247	CD247 molecule
1560679_at	0.0198912	0.000452	4.78	0.148142	3.63	LINC01127	long intergenic non-protein coding RNA 1127
218149_s_at	0.0198912	0.000452	4.78	0.148093	2.03	ZNF395	zinc finger protein 395
221827_at	0.019893	0.000453	4.78	0.146522	2.21	RBCK1	RANBP2-type and C3HC4-type zinc finger containing 1
1564385_at	0.019893	0.000453	-4.78	0.146421	-2.46	LOC219688	uncharacterized LOC219688
1561021_at	0.0199091	0.000454	-4.78	0.144429	-2.75	LOC105371307	uncharacterized LOC105371307
223317_at	0.0199091	0.000454	-4.78	0.143528	-2.09	ALKBH7	alkB homolog 7
204737_s_at	0.0199091	0.000454	-4.78	0.143256	-2.26	MYH7///MYH6	myosin, heavy chain 7, cardiac muscle, beta///myosin heavy chain 6
214788_x_at	0.0199703	0.000456	-4.78	0.139446	-3.58	DDN	dendrin
217628_at	0.0199909	0.000457	-4.78	0.135963	-3	CLIC5	chloride intracellular channel 5
220836_at	0.0199909	0.000458	-4.78	0.13582	-3.89	ZNF407	zinc finger protein 407
231325_at	0.0199909	0.000458	-4.77	0.134889	-3.01	UNC5D	unc-5 netrin receptor D
208869_s_at	0.0199909	0.000458	-4.77	0.134495	-1.63	GABARAPL1	GABA type A receptor associated protein like 1
207977_s_at	0.0200684	0.00046	-4.77	0.129813	-2.9	DPT	dermatopontin
229461_x_at	0.0200684	0.000461	-4.77	0.128338	-3.87	NEGR1	neuronal growth regulator 1
209335_at	0.0200875	0.000462	-4.77	0.12662	-3.06	DCN	decorin
238721_at	0.0201053	0.000463	-4.77	0.124963	-1.57	MDH1B	malate dehydrogenase 1B
228499_at	0.0201062	0.000463	4.77	0.123177	1.9	PFKFB4	6-phosphofructo-2-kinase/fructose-2,6-biphosphatase 4
218792_s_at	0.0201062	0.000464	-4.77	0.122824	-3.55	BSPRY	B-box and SPRY domain containing
231540_at	0.0201062	0.000464	-4.77	0.122575	-2.5	LOC100130691	uncharacterized LOC100130691
203422_at	0.0201698	0.000466	4.76	0.11829	2.44	POLD1	DAN polymerase delta 1, catalytic subunit
225573_at	0.0201742	0.000466	4.76	0.116916	1.86	NPHP3-ACAD11///ACAD11///NPHP3	NPHP3-ACAD11 readthrough (NMD candidate)///acyl-CoA dehydrogenase family member 11///nephronophthisis 3 (adolescent)
201893_x_at	0.0202029	0.000468	-4.76	0.114469	-3.22	DCN	decorin
228048_at	0.0202029	0.000468	-4.76	0.113961	-2.2	ZNF503-AS2	ZNF503 antisense RNA 2
219205_at	0.0202885	0.00047	-4.76	0.109024	-1.66	SRR	serine racemase
230418_s_at	0.0202908	0.000471	-4.76	0.108138	-3.23	GALNT16	polypeptide N-acetylgalactosaminyltransferase 16
236504_x_at	0.0202968	0.000471	-4.76	0.10707	-2.87	C6orf52	chromosome 6 open reading frame 52
205052_at	0.0203773	0.000473	-4.76	0.102399	-1.78	AUH	AU RNA binding methylglutaconyl-CoA hydratase
223005_s_at	0.0204045	0.000474	-4.75	0.100316	-1.65	TMEM245	transmembrane protein 245
214027_x_at	0.0204899	0.000477	-4.75	0.095001	-2.34	SUPT20H///DES	SPT20 homolog, SAGA complex component///desmin
237498_at	0.0204899	0.000477	-4.75	0.0945	-1.77	NEDD4L	neural precursor cell expressed, developmentally down-regulated 4-like, E3 ubiquitin protein ligase
209293_x_at	0.0204899	0.000478	-4.75	0.093639	-1.95	ID4	inhibitor of DNA binding 4, HLH protein
240187_at	0.0204899	0.000478	4.75	0.093115	3.54	PPP1R3C	protein phosphatase 1 regulatory subunit 3C
207213_s_at	0.02051	0.000479	-4.75	0.091379	-3.62	USP2	ubiquitin specific peptidase 2
1562295_at	0.0205257	0.000479	-4.75	0.089855	-1.9	ADAMTS9-AS2	ADAMTS9 antisense RNA 2
218726_at	0.0205349	0.00048	4.75	0.087873	2.4	HJURP	Holliday junction recognition protein
229938_at	0.0205656	0.000482	-4.74	0.084867	-2.89	TMEM238	transmembrane protein 238
1554571_at	0.0205689	0.000482	4.74	0.08394	2.38	APBB1IP	amyloid beta precursor protein binding family B member 1 interacting protein
237093_at	0.0205855	0.000483	-4.74	0.081949	-2.26	PRPF4B	pre-mRNA processing factor 4B
211367_s_at	0.0205855	0.000484	4.74	0.081089	1.76	CASP1	caspase 1
232202_at	0.0205855	0.000484	-4.74	0.080847	-3.21	FAM83B	family with sequence similarity 83 member B
207165_at	0.0206095	0.000485	4.74	0.078935	2.1	HMMR	hyaluronan mediated motility receptor
211794_at	0.0206245	0.000485	4.74	0.077453	2.77	FYB	FYN binding protein
1555650_at	0.0206627	0.000487	4.74	0.074867	2.23	KLHL17	kelch like family member 17
242488_at	0.0207093	0.000488	-4.74	0.071889	-2.23	CHRM3	cholinergic receptor muscarinic 3
1566528_at	0.0207713	0.00049	-4.73	0.067423	-2.66	CUX2	cut like homeobox 2
223442_at	0.0208531	0.000493	-4.73	0.062792	-2.06	NICN1	nicolin 1
203645_s_at	0.020931	0.000495	4.73	0.058362	2.47	CD163	CD163 molecule
214026_s_at	0.0209785	0.000497	-4.73	0.055327	-2.98	SPRED2	sprouty related EVH1 domain containing 2
206110_at	0.0209785	0.000497	4.73	0.054156	2.69	HIST1H3F///HIST1H3B///HIST1H3H///HIST1H3J///HIST1H3G///HIST1H3I///HIST1H3E///HIST1H3C///HIST1H3D///HIST1H3A	histone cluster 1, H3f///histone cluster 1, H3b///histone cluster 1, H3h///histone cluster 1, H3j///histone cluster 1, H3g///histone cluster 1, H3i///histone cluster 1, H3e///histone cluster 1, H3c///histone cluster 1, H3d///histone cluster 1, H3a
205830_at	0.0209785	0.000497	4.73	0.053852	2.54	CLGN	calmegin
235010_at	0.0210427	0.0005	-4.72	0.049325	-1.72	ZBED5-AS1	ZBED5 antisense RNA 1
214456_x_at	0.0210739	0.000501	4.72	0.04711	4.54	SAA2///SAA1	serum amyloid A2///serum amyloid A1
212858_at	0.021142	0.000503	4.72	0.042086	2.88	PAQR4	progestin and adipoQ receptor family member 4
205671_s_at	0.021142	0.000503	4.72	0.041791	2.61	HLA-DOB	major histocompatibility complex, class II, DO beta
207542_s_at	0.0211943	0.000505	-4.72	0.038481	-4.09	AQP1	aquaporin 1 (Colton blood group)
203369_x_at	0.021241	0.000507	4.72	0.035561	1.65	PDLIM7	PDZ and LIM domain 7
235979_at	0.0212498	0.000507	-4.71	0.034399	-2.92	C7	complement component 7
210381_s_at	0.0213488	0.00051	-4.71	0.029068	-2.03	CCKBR	cholecystokinin B receptor
236031_x_at	0.0213683	0.000511	-4.71	0.026156	-3.31	FREM1	FRAS1 related extracellular matrix 1
207543_s_at	0.0213683	0.000512	4.71	0.025815	2.03	P4HA1	prolyl 4-hydroxylase subunit alpha 1
209182_s_at	0.0213683	0.000512	4.71	0.025163	2.39	C10orf10	chromosome 10 open reading frame 10
208848_at	0.0213821	0.000513	-4.71	0.023087	-1.7	ADH5	alcohol dehydrogenase 5 (class III), chi polypeptide
225478_at	0.0213821	0.000513	-4.71	0.023025	-1.73	MFHAS1	malignant fibrous histiocytoma amplified sequence 1
208177_at	0.0214182	0.000514	-4.71	0.02041	-4.02	SLC34A1	solute carrier family 34 member 1
211915_s_at	0.0214182	0.000515	-4.71	0.019864	-2.59	TUBB7P	tubulin beta 7 pseudogene
232341_x_at	0.0214397	0.000516	-4.7	0.01813	-1.83	HABP4	hyaluronan binding protein 4
224057_s_at	0.0214528	0.000516	-4.7	0.01678	-1.65	THAP4	THAP domain containing 4
227295_at	0.0214542	0.000517	4.7	0.015515	2.06	IKBIP	IKBKB interacting protein
1552619_a_at	0.0214542	0.000517	4.7	0.015223	2.71	ANLN	anillin actin binding protein
213954_at	0.0214637	0.000519	-4.7	0.012604	-2.8	FAM169A	family with sequence similarity 169 member A
202825_at	0.0214637	0.000519	-4.7	0.01255	-1.52	SLC25A4	solute carrier family 25 member 4
228560_at	0.0214726	0.000519	-4.7	0.011022	-2.4	CHDH	choline dehydrogenase
213839_at	0.0214726	0.00052	-4.7	0.010651	-2.24	CLMN	calmin
207650_x_at	0.0214839	0.00052	-4.7	0.00939	-2.98	PTGER1	prostaglandin E receptor 1
206717_at	0.0214936	0.000521	-4.7	0.008206	-4.2	MYH8	myosin heavy chain 8
205109_s_at	0.0215131	0.000522	-4.7	0.006569	-2.66	LOC101930241///ARHGEF4	rho guanine nucleotide exchange factor 4-like///Rho guanine nucleotide exchange factor 4
205952_at	0.0215682	0.000523	4.7	0.00331	2.79	KCNK3	potassium two pore domain channel subfamily K member 3
1553946_at	0.0216402	0.000526	-4.69	-0.000712	-2.76	DCD	dermcidin
240142_at	0.0217007	0.000528	-4.69	-0.004464	-2.73	LOC101929289	uncharacterized LOC101929289
210689_at	0.0217007	0.000528	-4.69	-0.004941	-2.06	CLDN14	claudin 14
228273_at	0.0217054	0.000528	4.69	-0.005892	4.07	PRR11	proline rich 11
223241_at	0.0217344	0.00053	4.69	-0.007991	2.76	MIR6836///SNX8	microRNA 6836///sorting nexin 8
211607_x_at	0.0217344	0.00053	4.69	-0.008681	3.75	EGFR	epidermal growth factor receptor
205673_s_at	0.021738	0.00053	-4.69	-0.009583	-1.93	ASB9	ankyrin repeat and SOCS box containing 9
235202_x_at	0.0217466	0.000531	4.69	-0.010855	3.09	IKBIP	IKBKB interacting protein
208911_s_at	0.0217466	0.000532	-4.69	-0.012185	-1.51	PDHB	pyruvate dehydrogenase (lipoamide) beta
236838_at	0.0218128	0.000534	4.68	-0.016269	2	SRCIN1	SRC kinase signaling inhibitor 1
216336_x_at	0.0219024	0.000538	-4.68	-0.022883	-2.35	MT1E	metallothionein 1E
219573_at	0.0219186	0.000538	-4.68	-0.024341	-1.7	CARMIL1	capping protein regulator and myosin 1 linker 1
219140_s_at	0.022027	0.000542	-4.68	-0.030664	-5.02	RBP4	retinol binding protein 4
217118_s_at	0.0220522	0.000543	4.67	-0.032518	1.62	KIAA0930	KIAA0930
229376_at	0.0220588	0.000543	-4.67	-0.033544	-4.3	PROX1	prospero homeobox 1
228601_at	0.0221118	0.000546	-4.67	-0.038183	-2.08	HAGLR	HOXD antisense growth-associated long non-coding RNA
206912_at	0.0221118	0.000546	-4.67	-0.038379	-3.13	FOXE1	forkhead box E1
205709_s_at	0.0221118	0.000547	-4.67	-0.03938	-2.21	CDS1	CDP-diacylglycerol synthase 1
239887_at	0.0221118	0.000547	4.67	-0.039551	3.08	LOC101928554	uncharacterized LOC101928554
232979_at	0.0221218	0.000547	-4.67	-0.040726	-2.46	MIR10A	microRNA 10a
208894_at	0.0221587	0.000549	4.67	-0.043091	1.56	HLA-DRA	major histocompatibility complex, class II, DR alpha
208079_s_at	0.022209	0.000551	4.67	-0.046343	1.68	AURKA	aurora kinase A
1570189_at	0.0222373	0.000552	-4.67	-0.048754	-4.08	LINC00671	long intergenic non-protein coding RNA 671
225799_at	0.0222938	0.000554	4.66	-0.051976	1.96	LOC101930489///MIR4435-2HG///LINC00152	uncharacterized LOC101930489///MIR4435-2 host gene///long intergenic non-protein coding RNA 152
222072_at	0.0222994	0.000554	-4.66	-0.053126	-2.86	ADD3-AS1	ADD3 antisense RNA 1
1553977_a_at	0.0222994	0.000555	-4.66	-0.053771	-2.1	CYP39A1	cytochrome P450 family 39 subfamily A member 1
233510_s_at	0.0222994	0.000555	4.66	-0.054394	3.04	PARVG	parvin gamma
218172_s_at	0.0223119	0.000556	4.66	-0.055668	2.39	DERL1	derlin 1
213874_at	0.0223139	0.000557	-4.66	-0.057072	-3.3	SERPINA4	serpin family A member 4
209710_at	0.0223139	0.000557	-4.66	-0.057323	-2.53	GATA2	GATA binding protein 2
215522_at	0.0223139	0.000557	4.66	-0.058198	2.55	SORCS3	sortilin related VPS10 domain containing receptor 3
231568_at	0.0223139	0.000557	-4.66	-0.058646	-2.34	CT47A12///CT47A1///CT47A2///CT47A3///CT47A4///CT47A5///CT47A6///CT47A8///CT47A9///CT47A10///CT47A7///CT47A11	cancer/testis antigen family 47, member A12///cancer/testis antigen family 47, member A1///cancer/testis antigen family 47, member A2///cancer/testis antigen family 47, member A3///cancer/testis antigen family 47, member A4///cancer/testis antigen family 47, member A5///cancer/testis antigen family 47, member A6///cancer/testis antigen family 47, member A8///cancer/testis antigen family 47, membe…
201923_at	0.0223196	0.000558	4.66	-0.059615	1.78	PRDX4	peroxiredoxin 4
201422_at	0.0223906	0.000561	4.66	-0.064067	2.14	IFI30///PIK3R2	IFI30, lysosomal thiol reductase///phosphoinositide-3-kinase regulatory subunit 2
216778_s_at	0.0223906	0.000561	-4.66	-0.064802	-3.42	CYLC1	cylicin 1
231769_at	0.0223906	0.000562	4.66	-0.065759	1.74	FBXO6	F-box protein 6
210905_x_at	0.0223906	0.000562	4.66	-0.065997	2.11	POU5F1P4	POU class 5 homeobox 1 pseudogene 4
206914_at	0.0223906	0.000562	4.65	-0.066333	2.88	CRTAM	cytotoxic and regulatory T-cell molecule
220208_at	0.0225062	0.000566	-4.65	-0.074267	-1.74	ADAMTS13	ADAM metallopeptidase with thrombospondin type 1 motif 13
227874_at	0.0225387	0.000568	-4.65	-0.076404	-3.49	EMCN	endomucin
1552564_at	0.0225783	0.000569	-4.65	-0.078844	-2.71	NUDT9P1	nudix hydrolase 9 pseudogene 1
223319_at	0.0225838	0.00057	-4.65	-0.079798	-1.81	GPHN	gephyrin
211599_x_at	0.0225907	0.00057	4.65	-0.08081	1.81	MET	MET proto-oncogene, receptor tyrosine kinase
211473_s_at	0.0226023	0.000571	-4.65	-0.082669	-3.08	COL4A6	collagen type IV alpha 6 chain
1560383_at	0.0226023	0.000571	-4.65	-0.082743	-4.11	LOC101928658	uncharacterized LOC101928658
235460_at	0.0226763	0.000574	-4.64	-0.087516	-1.9	SNX22	sorting nexin 22
1554504_at	0.0226763	0.000574	-4.64	-0.087917	-2.7	NAALAD2	N-acetylated alpha-linked acidic dipeptidase 2
236311_at	0.0226763	0.000574	-4.64	-0.088093	-1.72	LOH12CR2	loss of heterozygosity, 12, chromosomal region 2 (non-protein coding)
224818_at	0.022689	0.000575	-4.64	-0.089355	-1.97	SORT1	sortilin 1
244126_at	0.0227053	0.000576	-4.64	-0.090772	-1.76	PEX11G	peroxisomal biogenesis factor 11 gamma
221667_s_at	0.0227079	0.000576	4.64	-0.091594	2.04	HSPB8	heat shock protein family B (small) member 8
229800_at	0.0227854	0.000579	4.64	-0.095657	2.59	DCLK1	doublecortin like kinase 1
236652_at	0.0227981	0.00058	-4.64	-0.096914	-3.46	LOC149703	uncharacterized LOC149703
244052_at	0.0228295	0.000581	-4.64	-0.099209	-1.56	CBR4	carbonyl reductase 4
230352_at	0.0228295	0.000582	-4.63	-0.10039	-2.03	PRPS2	phosphoribosyl pyrophosphate synthetase 2
1555171_at	0.0228337	0.000582	-4.63	-0.101277	-2.82	ST3GAL3	ST3 beta-galactoside alpha-2,3-sialyltransferase 3
212859_x_at	0.022856	0.000583	-4.63	-0.102943	-2.34	MT1E	metallothionein 1E
229178_at	0.0228807	0.000584	-4.63	-0.104709	-2.84	PRTG	protogenin
242093_at	0.0229453	0.000586	-4.63	-0.10819	-2.91	SYTL5	synaptotagmin like 5
222644_s_at	0.0229966	0.000588	4.63	-0.111743	1.92	COLGALT1	collagen beta(1-O)galactosyltransferase 1
206991_s_at	0.0229966	0.000588	4.63	-0.111794	2.91	CCR5	C-C motif chemokine receptor 5 (gene/pseudogene)
238428_at	0.0229993	0.000589	-4.63	-0.112615	-2.27	KCNJ15	potassium voltage-gated channel subfamily J member 15
239291_at	0.0230021	0.000589	-4.63	-0.113435	-2.7	TRPM3	transient receptor potential cation channel subfamily M member 3
213228_at	0.0230247	0.00059	-4.63	-0.115105	-1.82	PDE8B	phosphodiesterase 8B
216233_at	0.0230336	0.000591	4.63	-0.116189	2.58	CD163	CD163 molecule
1554931_at	0.0231879	0.000596	-4.62	-0.123669	-3.73	CYP4A22///CYP4A11	cytochrome P450 family 4 subfamily A member 22///cytochrome P450 family 4 subfamily A member 11
1555629_at	0.0232058	0.000597	4.62	-0.125621	2.3	HAVCR2	hepatitis A virus cellular receptor 2
1556633_at	0.0232976	0.0006	-4.62	-0.130964	-1.77	C1orf204	chromosome 1 open reading frame 204
231538_at	0.0232976	0.000601	-4.62	-0.132457	-1.53	C11orf1	chromosome 11 open reading frame 1
239128_at	0.0232976	0.000601	-4.62	-0.132998	-2.49	TMEM221	transmembrane protein 221
221539_at	0.0233106	0.000602	4.61	-0.134922	1.89	EIF4EBP1	eukaryotic translation initiation factor 4E binding protein 1
244353_s_at	0.0233106	0.000602	-4.61	-0.134943	-2.4	SLC2A12	solute carrier family 2 member 12
203504_s_at	0.0233381	0.000604	4.61	-0.136799	2	ABCA1	ATP binding cassette subfamily A member 1
229290_at	0.0233451	0.000604	-4.61	-0.138285	-1.57	DAPL1	death associated protein like 1
233527_at	0.0233451	0.000605	-4.61	-0.138487	-2.09	LOC101929340	uncharacterized LOC101929340
230717_at	0.0235333	0.00061	-4.61	-0.147791	-1.98	LCN12	lipocalin 12
222680_s_at	0.0235333	0.000611	4.61	-0.14895	1.87	DTL	denticleless E3 ubiquitin protein ligase homolog
203372_s_at	0.0235333	0.000611	-4.61	-0.149164	-2.22	SOCS2	suppressor of cytokine signaling 2
244747_at	0.0235342	0.000612	-4.61	-0.149895	-2.05	NPNT	nephronectin
208423_s_at	0.02354	0.000612	4.6	-0.150828	2.54	MSR1	macrophage scavenger receptor 1
209368_at	0.0236054	0.000614	-4.6	-0.154253	-3.02	EPHX2	epoxide hydrolase 2
211991_s_at	0.0236124	0.000615	4.6	-0.155235	1.79	HLA-DPA1	major histocompatibility complex, class II, DP alpha 1
219543_at	0.0236229	0.000616	-4.6	-0.156364	-2.35	PBLD	phenazine biosynthesis like protein domain containing
227155_at	0.023656	0.000617	-4.6	-0.158526	-1.52	LMO4	LIM domain only 4
229337_at	0.023656	0.000617	-4.6	-0.159123	-2.38	USP2	ubiquitin specific peptidase 2
227804_at	0.0236812	0.000619	-4.6	-0.160858	-2.7	TLCD1	TLC domain containing 1
207832_at	0.0237027	0.00062	-4.6	-0.163116	-2.68	BAIAP2	BAI1 associated protein 2
212797_at	0.0237066	0.00062	-4.6	-0.163981	-1.67	SORT1	sortilin 1
214243_s_at	0.0238023	0.000623	-4.59	-0.168631	-2.47	SERHL2///SERHL	serine hydrolase-like 2///serine hydrolase-like (pseudogene)
207336_at	0.0238607	0.000625	-4.59	-0.171733	-2.8	SOX5	SRY-box 5
201063_at	0.0238734	0.000626	4.59	-0.172941	1.84	RCN1	reticulocalbin 1
230030_at	0.023877	0.000627	-4.59	-0.173775	-5.98	HS6ST2	heparan sulfate 6-O-sulfotransferase 2
206964_at	0.0239148	0.000628	-4.59	-0.17634	-3.07	NAT8B	N-acetyltransferase 8B (putative, gene/pseudogene)
1564017_at	0.0239148	0.000629	-4.59	-0.176705	-2.67	COL18A1-AS1	COL18A1 antisense RNA 1
205601_s_at	0.0239526	0.00063	-4.59	-0.178944	-1.61	HOXB5	homeobox B5
235537_at	0.0239656	0.000631	-4.59	-0.180161	-2.89	OCIAD1	OCIA domain containing 1
213556_at	0.0239757	0.000632	-4.59	-0.182683	-1.74	PINLYP	phospholipase A2 inhibitor and LY6/PLAUR domain containing
209243_s_at	0.0239757	0.000633	-4.59	-0.183161	-2.55	PEG3	paternally expressed 3
205317_s_at	0.0239757	0.000633	-4.59	-0.183876	-2.17	SLC15A2	solute carrier family 15 member 2
237450_at	0.0239757	0.000633	-4.59	-0.18433	-2.79	LOC389332	uncharacterized LOC389332
215311_at	0.0239757	0.000634	-4.58	-0.184671	-2.6	NTRK3	neurotrophic receptor tyrosine kinase 3
217096_at	0.0240101	0.000636	-4.58	-0.188038	-1.87	PCLO	piccolo presynaptic cytomatrix protein
229730_at	0.0240101	0.000636	-4.58	-0.188512	-3.07	SMTNL2	smoothelin like 2
219191_s_at	0.0240101	0.000637	4.58	-0.189093	2.85	BIN2	bridging integrator 2
1552755_at	0.0240101	0.000637	-4.58	-0.18948	-2.41	C9orf66	chromosome 9 open reading frame 66
212097_at	0.0240607	0.000639	4.58	-0.192232	1.99	CAV1	caveolin 1
206461_x_at	0.0240722	0.000639	-4.58	-0.193584	-2.33	MT1H	metallothionein 1H
241901_at	0.0240722	0.00064	-4.58	-0.194652	-1.91	LOC101929988	uncharacterized LOC101929988
219847_at	0.0240722	0.000641	-4.58	-0.196401	-2.23	HDAC11	histone deacetylase 11
203867_s_at	0.0240722	0.000641	4.58	-0.196629	2.63	NLE1	notchless homolog 1
202597_at	0.0240722	0.000641	-4.58	-0.196762	-2.77	IRF6	interferon regulatory factor 6
222862_s_at	0.0240915	0.000642	-4.58	-0.198226	-2.83	AK5	adenylate kinase 5
223315_at	0.0241578	0.000645	-4.58	-0.201608	-3.19	NTN4	netrin 4
204971_at	0.0241671	0.000646	4.57	-0.203072	2.02	CSTA	cystatin A
1552946_at	0.0242198	0.000648	4.57	-0.206823	3.46	ZNF114	zinc finger protein 114
209603_at	0.0242736	0.00065	-4.57	-0.20968	-3.51	GATA3	GATA binding protein 3
216039_at	0.0242905	0.000651	-4.57	-0.211038	-4.64	GABRA2	gamma-aminobutyric acid type A receptor alpha2 subunit
209183_s_at	0.0242966	0.000651	4.57	-0.211958	1.95	C10orf10	chromosome 10 open reading frame 10
207344_at	0.0243348	0.000654	-4.57	-0.215698	-1.82	AKAP3	A-kinase anchoring protein 3
239528_at	0.0243348	0.000654	-4.57	-0.21604	-1.93	PROM2	prominin 2
227081_at	0.0243348	0.000654	-4.57	-0.216295	-2.07	DNALI1	dynein axonemal light intermediate chain 1
241859_at	0.0243348	0.000655	-4.57	-0.216786	-3.11	PLCL1	phospholipase C like 1
235043_at	0.0244073	0.000657	-4.56	-0.220448	-1.69	FAM122A	family with sequence similarity 122A
240668_s_at	0.0244187	0.000658	-4.56	-0.221578	-2.86	SERP2	stress-associated endoplasmic reticulum protein family member 2
227821_at	0.0244437	0.000659	4.56	-0.223921	3.33	LGI4	leucine rich repeat LGI family member 4
204092_s_at	0.0245026	0.000661	4.56	-0.226956	1.72	AURKA	aurora kinase A
227945_at	0.0245129	0.000662	-4.56	-0.228035	-1.39	TBC1D1	TBC1 domain family member 1
1558034_s_at	0.0245301	0.000665	4.56	-0.232354	4.56	CP	ceruloplasmin (ferroxidase)
231634_at	0.0245301	0.000666	-4.56	-0.233268	-5.17	SLC12A3	solute carrier family 12 member 3
210090_at	0.0245301	0.000666	-4.56	-0.233324	-3.85	ARC	activity regulated cytoskeleton associated protein
242375_x_at	0.0245301	0.000666	-4.56	-0.233526	-3.15	LOC101929036///PAH	uncharacterized LOC101929036///phenylalanine hydroxylase
205572_at	0.0245301	0.000667	4.56	-0.234815	2.98	ANGPT2	angiopoietin 2
219594_at	0.0245301	0.000667	4.56	-0.235414	2.6	NINJ2	ninjurin 2
239319_at	0.0245301	0.000667	-4.55	-0.235694	-1.9	LINC00992	long intergenic non-protein coding RNA 992
242881_x_at	0.0245301	0.000668	4.55	-0.236302	2.85	DUXAP10	double homeobox A pseudogene 10
225566_at	0.0245301	0.000668	4.55	-0.236691	2.63	NRP2	neuropilin 2
242661_x_at	0.0245517	0.00067	-4.55	-0.238963	-2.78	ALS2CR12	amyotrophic lateral sclerosis 2 chromosome region candidate 12
206872_at	0.0245517	0.00067	-4.55	-0.23982	-4.08	SLC17A1	solute carrier family 17 member 1
240631_at	0.0245517	0.00067	-4.55	-0.240199	-2.35	ADGRV1	adhesion G protein-coupled receptor V1
221666_s_at	0.0245671	0.000672	4.55	-0.24248	1.97	PYCARD	PYD and CARD domain containing
223422_s_at	0.0245671	0.000672	-4.55	-0.242675	-2.43	ARHGAP24	Rho GTPase activating protein 24
219225_at	0.0245671	0.000673	4.55	-0.243401	2.83	PGBD5	piggyBac transposable element derived 5
1554195_a_at	0.0245671	0.000673	4.55	-0.24345	3.49	C5orf46	chromosome 5 open reading frame 46
234928_x_at	0.0245739	0.000673	-4.55	-0.244378	-2.9	RUNX3	runt related transcription factor 3
230710_at	0.0246349	0.000676	4.55	-0.248131	1.88	MIR210HG	MIR210 host gene
211116_at	0.0246845	0.000678	-4.55	-0.250981	-3.01	SLC9A2	solute carrier family 9 member A2
229518_at	0.0246845	0.000678	-4.55	-0.251517	-2.09	FAM46B	family with sequence similarity 46 member B
212151_at	0.0246845	0.000679	-4.54	-0.25273	-2.15	PBX1	PBX homeobox 1
1556346_at	0.0247449	0.000681	-4.54	-0.255853	-2.52	COTL1	coactosin like F-actin binding protein 1
207517_at	0.0247449	0.000682	-4.54	-0.256444	-2.84	LAMC2	laminin subunit gamma 2
204033_at	0.0247744	0.000683	4.54	-0.258924	2.01	TRIP13	thyroid hormone receptor interactor 13
221958_s_at	0.0247891	0.000685	-4.54	-0.261183	-2.72	WLS	wntless Wnt ligand secretion mediator
235718_at	0.0247891	0.000685	-4.54	-0.261462	-2.48	SRL	sarcalumenin
239933_x_at	0.0248468	0.000687	-4.54	-0.264517	-2.07	BBOF1	basal body orientation factor 1
220024_s_at	0.0248468	0.000688	-4.54	-0.265052	-3.47	PRX	periaxin
238215_at	0.0248516	0.000688	-4.54	-0.266282	-3.41	SLC6A18	solute carrier family 6 member 18
206011_at	0.0248516	0.000689	4.54	-0.266544	1.95	CASP1	caspase 1
219990_at	0.0248822	0.00069	4.54	-0.268404	3.77	E2F8	E2F transcription factor 8
1556262_at	0.0248862	0.00069	-4.54	-0.269213	-3.57	LOC101928818///PWRN1	uncharacterized LOC101928818///Prader-Willi region non-protein coding RNA 1
1557292_a_at	0.0249105	0.000692	-4.53	-0.271124	-2.33	MCOLN3	mucolipin 3
228127_at	0.0249105	0.000692	4.53	-0.2718	2.42	KCNK3	potassium two pore domain channel subfamily K member 3
201599_at	0.0249105	0.000693	-4.53	-0.272263	-1.57	OAT	ornithine aminotransferase
226770_at	0.0249105	0.000693	-4.53	-0.272763	-2.26	MAGI3	membrane associated guanylate kinase, WW and PDZ domain containing 3
230393_at	0.0249202	0.000694	-4.53	-0.273794	-1.53	CUL5	cullin 5
212671_s_at	0.0251613	0.000701	4.53	-0.283923	2.3	LOC100509457///HLA-DQA2///HLA-DQA1	HLA class II histocompatibility antigen, DQ alpha 1 chain-like///major histocompatibility complex, class II, DQ alpha 2///major histocompatibility complex, class II, DQ alpha 1
229639_s_at	0.0251613	0.000701	-4.53	-0.284561	-2.68	SLC19A1	solute carrier family 19 member 1
219281_at	0.0251967	0.000703	-4.53	-0.286647	-2.54	MSRA	methionine sulfoxide reductase A
35820_at	0.0252002	0.000704	4.52	-0.288514	3.08	GM2A	GM2 ganglioside activator
203554_x_at	0.0252002	0.000705	4.52	-0.289104	2.57	PTTG1	pituitary tumor-transforming 1
220222_at	0.0252371	0.000706	-4.52	-0.291392	-2.96	RBM12B-AS1	RBM12B antisense RNA 1
214106_s_at	0.025238	0.000707	-4.52	-0.292566	-1.65	GMDS	GDP-mannose 4,6-dehydratase
215015_at	0.0252702	0.000709	-4.52	-0.295571	-1.91	BICDL1	BICD family like cargo adaptor 1
220417_s_at	0.0252702	0.00071	-4.52	-0.296356	-1.54	THAP4	THAP domain containing 4
1556489_at	0.0252702	0.00071	-4.52	-0.296917	-3.12	LOC101805491///TMEM247	uncharacterized LOC101805491///transmembrane protein 247
214115_at	0.0252702	0.00071	-4.52	-0.297195	-2.77	VAMP5	vesicle associated membrane protein 5
205910_s_at	0.0252702	0.000711	-4.52	-0.298091	-3.38	CEL	carboxyl ester lipase
1561083_at	0.0252702	0.000711	-4.52	-0.298452	-1.81	LINC01254	long intergenic non-protein coding RNA 1254
210374_x_at	0.0252813	0.000712	-4.52	-0.299524	-2.06	PTGER3	prostaglandin E receptor 3
205501_at	0.0252968	0.000713	4.52	-0.300767	2.25	PDE10A	phosphodiesterase 10A
238177_at	0.0253057	0.000714	-4.52	-0.301753	-4.28	SLC6A19	solute carrier family 6 member 19
205259_at	0.0254808	0.00072	-4.51	-0.310228	-3.86	NR3C2	nuclear receptor subfamily 3 group C member 2
201641_at	0.0254808	0.00072	4.51	-0.310451	1.5	BST2	bone marrow stromal cell antigen 2
1569592_a_at	0.0254833	0.000721	-4.51	-0.311183	-3.79	F11	coagulation factor XI
205754_at	0.025533	0.000722	4.51	-0.313741	3.77	F2	coagulation factor II, thrombin
208608_s_at	0.0255349	0.000723	4.51	-0.314446	2.52	SNTB1	syntrophin beta 1
229423_at	0.0255737	0.000725	-4.51	-0.316578	-2.28	CHEK1	checkpoint kinase 1
230925_at	0.0256712	0.000728	4.5	-0.320957	2.15	APBB1IP	amyloid beta precursor protein binding family B member 1 interacting protein
230966_at	0.0257079	0.00073	4.5	-0.32339	4.15	IL4I1	interleukin 4 induced 1
213438_at	0.0257079	0.000731	-4.5	-0.324883	-2.65	NFASC	neurofascin
229266_at	0.0257079	0.000732	-4.5	-0.326155	-2.43	SHISA6	shisa family member 6
223158_s_at	0.0257079	0.000732	4.5	-0.327262	1.86	NEK6	NIMA related kinase 6
232804_at	0.0257079	0.000733	4.5	-0.327432	3.49	LINC01426	long intergenic non-protein coding RNA 1426
231273_x_at	0.0257694	0.000735	4.5	-0.330413	2.39	FRZB	frizzled-related protein
206191_at	0.0258367	0.000737	-4.5	-0.333613	-2.69	ENTPD3	ectonucleoside triphosphate diphosphohydrolase 3
206610_s_at	0.0258834	0.000739	-4.5	-0.336406	-3.53	F11	coagulation factor XI
220234_at	0.0258834	0.000739	-4.5	-0.33665	-2.9	CA8	carbonic anhydrase 8
1565774_at	0.0259119	0.000741	-4.49	-0.338364	-2.44	PIEZO2	piezo type mechanosensitive ion channel component 2
202340_x_at	0.0261336	0.000748	-4.49	-0.347379	-3.27	NR4A1	nuclear receptor subfamily 4 group A member 1
223822_at	0.0262266	0.000751	-4.49	-0.351503	-1.89	SUSD4	sushi domain containing 4
235978_at	0.0262346	0.000751	-4.49	-0.352431	-3.31	FABP4	fatty acid binding protein 4
213744_at	0.0262937	0.000754	-4.48	-0.355276	-1.56	ATRNL1	attractin like 1
204775_at	0.0262957	0.000754	4.48	-0.355976	2.12	CHAF1B	chromatin assembly factor 1 subunit B
1568690_a_at	0.0263064	0.000755	-4.48	-0.357007	-2.6	LOC100631378	uncharacterized 100631378
229402_at	0.0263075	0.000755	-4.48	-0.357675	-1.72	SAMD13	sterile alpha motif domain containing 13
1553970_s_at	0.0263538	0.000758	-4.48	-0.360457	-4.81	CEL	carboxyl ester lipase
205893_at	0.0263538	0.000758	4.48	-0.361064	2.48	NLGN1	neuroligin 1
218078_s_at	0.0263538	0.000759	-4.48	-0.361734	-1.81	ZDHHC3	zinc finger DHHC-type containing 3
1556366_s_at	0.0263538	0.000759	-4.48	-0.361909	-3.43	LY86-AS1	LY86 antisense RNA 1
225717_at	0.0264183	0.000761	4.48	-0.36494	2.08	LNPK	lunapark, ER junction formation factor
229034_at	0.0264195	0.000762	-4.48	-0.365796	-2.46	SOBP	sine oculis binding protein homolog
33304_at	0.0264195	0.000762	4.48	-0.366238	3	ISG20	interferon stimulated exonuclease gene 20
205358_at	0.0264195	0.000763	-4.48	-0.367061	-2.5	GRIA2	glutamate ionotropic receptor AMPA type subunit 2
217087_at	0.0264195	0.000763	-4.48	-0.367481	-2.34	C1orf68	chromosome 1 open reading frame 68
1559928_at	0.0265543	0.000768	-4.47	-0.373357	-2.27	PAPPA	pappalysin 1
202619_s_at	0.0265543	0.000768	4.47	-0.37408	4.13	PLOD2	procollagen-lysine,2-oxoglutarate 5-dioxygenase 2
238716_at	0.0265571	0.00077	-4.47	-0.376098	-1.97	LOC100506990	uncharacterized LOC100506990
1553072_at	0.0265571	0.00077	-4.47	-0.376325	-2.56	BNIPL	BCL2 interacting protein like
242015_x_at	0.0265715	0.000771	-4.47	-0.378177	-1.65	APEH	acylaminoacyl-peptide hydrolase
240228_at	0.0265715	0.000772	-4.47	-0.378479	-1.66	CSMD3	CUB and Sushi multiple domains 3
1552453_a_at	0.0265715	0.000772	-4.47	-0.379539	-2.25	WDR88	WD repeat domain 88
214187_x_at	0.0265715	0.000772	-4.47	-0.379597	-2.3	CTDSPL	CTD small phosphatase like
1561383_at	0.0265715	0.000773	-4.47	-0.37996	-3.09	LOC284661	uncharacterized LOC284661
223008_s_at	0.0265934	0.000774	-4.47	-0.381388	-1.65	TMEM245	transmembrane protein 245
209957_s_at	0.0266532	0.000776	-4.47	-0.384217	-2.35	NPPA	natriuretic peptide A
1556300_s_at	0.0266741	0.000778	-4.47	-0.386226	-5.59	SIM1	single-minded family bHLH transcription factor 1
243894_at	0.0266774	0.000779	4.47	-0.38795	1.42	SLC41A2	solute carrier family 41 member 2
1563776_at	0.0266774	0.000779	-4.47	-0.38819	-1.55	LOC100507283	uncharacterized LOC100507283
243225_at	0.0266774	0.000779	-4.47	-0.388377	-1.58	FGF14-AS2	FGF14 antisense RNA 2
219685_at	0.0266774	0.00078	-4.47	-0.388814	-1.71	TMEM35A	transmembrane protein 35A
230706_s_at	0.0266784	0.00078	4.46	-0.389464	2.23	CAMK2N2	calcium/calmodulin dependent protein kinase II inhibitor 2
212838_at	0.026779	0.000784	-4.46	-0.394401	-1.64	DNMBP	dynamin binding protein
213380_x_at	0.0269037	0.000788	-4.46	-0.399587	-2.42	LOC102724562///MST1L///MST1P2///MST1	macrophage stimulating 1 pseudogene///macrophage stimulating 1 like///macrophage stimulating 1 pseudogene 2///macrophage stimulating 1
205890_s_at	0.0270212	0.000792	4.46	-0.404489	2.48	UBD///GABBR1	ubiquitin D///gamma-aminobutyric acid type B receptor subunit 1
206462_s_at	0.0270795	0.000796	-4.45	-0.409124	-3.44	NTRK3	neurotrophic receptor tyrosine kinase 3
1553033_at	0.0270795	0.000796	-4.45	-0.409665	-2.74	SYTL5	synaptotagmin like 5
226701_at	0.0270795	0.000796	-4.45	-0.409716	-2.39	GJA5	gap junction protein alpha 5
224360_s_at	0.0270795	0.000797	-4.45	-0.410288	-2.28	PACSIN1	protein kinase C and casein kinase substrate in neurons 1
207355_at	0.0271027	0.000799	-4.45	-0.412355	-2.71	SLC1A7	solute carrier family 1 member 7
216968_at	0.0271503	0.000802	-4.45	-0.416393	-2.58	MASP2	mannan binding lectin serine peptidase 2
216733_s_at	0.0271503	0.000802	-4.45	-0.416584	-2.44	GATM	glycine amidinotransferase
223731_at	0.0271503	0.000802	-4.45	-0.417129	-2.84	MYCBPAP	MYCBP associated protein
241666_at	0.0271503	0.000803	-4.45	-0.418291	-1.45	TCAIM	T-cell activation inhibitor, mitochondrial
1561891_at	0.0271503	0.000803	-4.45	-0.418347	-2.28	LOC101928668	uncharacterized LOC101928668
1557531_a_at	0.027192	0.000805	-4.45	-0.420466	-3.27	C10orf55	chromosome 10 open reading frame 55
217466_x_at	0.0272466	0.000807	4.45	-0.423047	1.63	SNORA64///RPS2	small nucleolar RNA, H/ACA box 64///ribosomal protein S2
231268_at	0.0272729	0.000809	-4.44	-0.424607	-2.34	MYBL1	MYB proto-oncogene like 1
229203_at	0.0272767	0.000809	-4.44	-0.425651	-2.13	B4GALNT3	beta-1,4-N-acetyl-galactosaminyltransferase 3
211468_s_at	0.0272767	0.00081	-4.44	-0.425956	-2.71	RECQL5	RecQ like helicase 5
1555831_s_at	0.0273016	0.000811	4.44	-0.427751	2.08	LRRC41	leucine rich repeat containing 41
209016_s_at	0.0273016	0.000812	-4.44	-0.4282	-3.16	KRT7	keratin 7
202068_s_at	0.0273016	0.000812	-4.44	-0.429275	-1.95	LDLR	low density lipoprotein receptor
1555405_at	0.0273075	0.000814	-4.44	-0.430624	-2.58	UBE3C	ubiquitin protein ligase E3C
202016_at	0.0273075	0.000814	-4.44	-0.430699	-2.48	MEST	mesoderm specific transcript
231081_at	0.0273494	0.000815	-4.44	-0.432812	-2.23	C2orf73	chromosome 2 open reading frame 73
1560220_a_at	0.0273714	0.000817	-4.44	-0.435112	-2.33	CBY1	chibby family member 1, beta catenin antagonist
228929_at	0.0273714	0.000818	-4.44	-0.435905	-3.19	DNASE1	deoxyribonuclease 1
222962_s_at	0.0273714	0.000819	4.44	-0.436873	2.42	MCM10	minichromosome maintenance 10 replication initiation factor
204519_s_at	0.0273714	0.000819	-4.44	-0.436986	-2.48	PLLP	plasmolipin
230130_at	0.0273714	0.000819	-4.44	-0.437143	-2.93	SLIT2	slit guidance ligand 2
203561_at	0.0273714	0.00082	4.44	-0.437819	1.7	FCGR2A	Fc fragment of IgG receptor IIa
228262_at	0.0273756	0.00082	4.44	-0.43857	3.3	MAP7D2	MAP7 domain containing 2
233368_s_at	0.0274146	0.000822	-4.43	-0.441192	-2.48	DNAJC27	DnaJ heat shock protein family (Hsp40) member C27
231256_at	0.0274146	0.000822	-4.43	-0.441353	-4	LOC727944	uncharacterized LOC727944
201522_x_at	0.0274146	0.000823	-4.43	-0.441835	-1.53	SNURF///SNRPN	SNRPN upstream reading frame///small nuclear ribonucleoprotein polypeptide N
211882_x_at	0.0274146	0.000824	-4.43	-0.442852	-4.46	FUT6	fucosyltransferase 6
224179_s_at	0.0274146	0.000824	-4.43	-0.443063	-6.12	MIOX	myo-inositol oxygenase
1560397_s_at	0.0274146	0.000824	4.43	-0.443571	1.87	KLHL6	kelch like family member 6
203764_at	0.0274209	0.000825	4.43	-0.444395	3.22	DLGAP5	DLG associated protein 5
1558983_at	0.0274421	0.000826	4.43	-0.445753	3.68	LRRC41	leucine rich repeat containing 41
1552897_a_at	0.0274558	0.000827	-4.43	-0.446851	-2.78	KCNG3	potassium voltage-gated channel modifier subfamily G member 3
210887_s_at	0.0274558	0.000828	-4.43	-0.447941	-2.17	EVC	EvC ciliary complex subunit 1
238584_at	0.0274693	0.000829	-4.43	-0.449118	-2.22	IQCA1	IQ motif containing with AAA domain 1
1569512_at	0.0274988	0.000832	-4.43	-0.453045	-1.83	SVIL	supervillin
243792_x_at	0.0274988	0.000832	-4.43	-0.453089	-2.88	PTPN13	protein tyrosine phosphatase, non-receptor type 13
240168_at	0.0274988	0.000832	-4.43	-0.453096	-1.44	XPO7	exportin 7
242579_at	0.0274988	0.000833	-4.43	-0.45396	-2.82	BMPR1B	bone morphogenetic protein receptor type 1B
1553997_a_at	0.0274988	0.000833	4.43	-0.45423	2.11	ASPHD1	aspartate beta-hydroxylase domain containing 1
211460_at	0.0274988	0.000833	-4.43	-0.454341	-1.75	TTTY9B///TTTY9A	testis-specific transcript, Y-linked 9B (non-protein coding)///testis-specific transcript, Y-linked 9A (non-protein coding)
210977_s_at	0.0275019	0.000834	4.43	-0.455575	1.76	HSF4	heat shock transcription factor 4
238100_at	0.0275019	0.000835	-4.43	-0.455684	-2.61	AAK1	AP2 associated kinase 1
224374_s_at	0.0275019	0.000835	4.43	-0.45623	1.65	EMILIN2	elastin microfibril interfacer 2
232360_at	0.0275305	0.000837	-4.42	-0.458062	-4.41	EHF	ETS homologous factor
227336_at	0.0275305	0.000837	-4.42	-0.458438	-2.83	DTX1	deltex E3 ubiquitin ligase 1
208240_s_at	0.027536	0.000838	-4.42	-0.45982	-2.08	FGF1	fibroblast growth factor 1
222349_x_at	0.0275401	0.000839	-4.42	-0.460864	-1.46	RNF126P1	ring finger protein 126 pseudogene 1
204982_at	0.0275401	0.00084	4.42	-0.462479	1.94	GIT2	GIT ArfGAP 2
236095_at	0.0275401	0.00084	-4.42	-0.46253	-2.88	NTRK2	neurotrophic receptor tyrosine kinase 2
223501_at	0.0275401	0.000841	4.42	-0.463183	2.32	TNFSF13B	tumor necrosis factor superfamily member 13b
219273_at	0.0275401	0.000841	-4.42	-0.463801	-1.54	CCNK	cyclin K
213479_at	0.0275401	0.000841	4.42	-0.463826	4.83	NPTX2	neuronal pentraxin 2
1560595_at	0.0275401	0.000842	-4.42	-0.464097	-2.4	LOC100128993	uncharacterized LOC100128993
221054_s_at	0.0275498	0.000842	-4.42	-0.465032	-2.54	TCL6	T-cell leukemia/lymphoma 6 (non-protein coding)
1561237_at	0.0275611	0.000843	-4.42	-0.466023	-2.71	LOC101929657	uncharacterized LOC101929657
230445_at	0.0277496	0.00085	-4.42	-0.473319	-2.53	BTBD17	BTB domain containing 17
227446_s_at	0.0277927	0.000851	-4.41	-0.475435	-2.03	DHRS4-AS1	DHRS4 antisense RNA 1
220318_at	0.0278504	0.000854	-4.41	-0.478234	-3.41	EPN3	epsin 3
219132_at	0.0278504	0.000854	-4.41	-0.47865	-1.66	PELI2	pellino E3 ubiquitin protein ligase family member 2
201188_s_at	0.0279035	0.000856	4.41	-0.481111	2.15	ITPR3	inositol 1,4,5-trisphosphate receptor type 3
206392_s_at	0.0279516	0.000859	4.41	-0.484265	3.17	RARRES1	retinoic acid receptor responder 1
1554106_at	0.0279516	0.000859	-4.41	-0.484565	-1.42	NBEAL1	neurobeachin like 1
238789_at	0.0280164	0.000862	-4.41	-0.487996	-1.75	KANK1	KN motif and ankyrin repeat domains 1
225358_at	0.0280164	0.000863	-4.41	-0.488587	-1.65	DNAJC19	DnaJ heat shock protein family (Hsp40) member C19
210085_s_at	0.0280164	0.000863	-4.41	-0.488643	-4.02	ANXA9	annexin A9
1568813_at	0.0280244	0.000865	4.41	-0.490629	2.44	SLC16A1-AS1	SLC16A1 antisense RNA 1
211273_s_at	0.0280347	0.000866	-4.41	-0.49216	-1.77	TBX1	T-box 1
1552947_x_at	0.028118	0.000869	4.4	-0.495661	2.39	ZNF114	zinc finger protein 114
227629_at	0.0281602	0.000871	-4.4	-0.497804	-2.44	PRLR	prolactin receptor
226360_at	0.0281602	0.000871	-4.4	-0.498301	-1.7	ZNRF3	zinc and ring finger 3
1558738_at	0.0281847	0.000873	4.4	-0.499737	3.06	NOL3	nucleolar protein 3
221690_s_at	0.0282046	0.000875	-4.4	-0.502175	-2.72	NLRP2	NLR family pyrin domain containing 2
218978_s_at	0.0282195	0.000876	4.4	-0.503274	2	SLC25A37	solute carrier family 25 member 37
228360_at	0.0282196	0.000876	-4.4	-0.503856	-2.17	LYPD6B	LY6/PLAUR domain containing 6B
226611_s_at	0.0282258	0.000877	-4.4	-0.504652	-3.87	CENPV	centromere protein V
218720_x_at	0.0283747	0.000882	4.39	-0.510409	3.18	SEZ6L2	seizure related 6 homolog like 2
207036_x_at	0.0283911	0.000884	-4.39	-0.512195	-2.63	GRIN2D	glutamate ionotropic receptor NMDA type subunit 2D
227801_at	0.0283911	0.000884	4.39	-0.512251	2.24	TRIM59	tripartite motif containing 59
210038_at	0.0283911	0.000885	-4.39	-0.513043	-1.83	PRKCQ	protein kinase C theta
1570226_at	0.0283911	0.000885	-4.39	-0.513292	-2.81	LOC101927124	uncharacterized LOC101927124
207673_at	0.0284195	0.000886	-4.39	-0.514851	-3	NPHS1	NPHS1, nephrin
242907_at	0.0284481	0.000888	4.39	-0.516419	2.66	GBP2	guanylate binding protein 2
203373_at	0.0284802	0.00089	-4.39	-0.518483	-1.89	SOCS2	suppressor of cytokine signaling 2
1555175_a_at	0.0284802	0.00089	-4.39	-0.51868	-1.88	PBLD	phenazine biosynthesis like protein domain containing
227112_at	0.0284802	0.000891	4.39	-0.5196	2.43	TMCC1	transmembrane and coiled-coil domain family 1
228448_at	0.0284802	0.000891	-4.39	-0.520404	-1.61	MAP6	microtubule associated protein 6
228850_s_at	0.0284802	0.000891	-4.39	-0.520409	-2.29	SLIT2	slit guidance ligand 2
230793_at	0.0284918	0.000892	-4.39	-0.521384	-1.81	CARMIL1	capping protein regulator and myosin 1 linker 1
207160_at	0.0285011	0.000893	-4.39	-0.522282	-2.43	IL12A	interleukin 12A
238076_at	0.0285056	0.000894	-4.39	-0.523254	-2.19	GATAD2B	GATA zinc finger domain containing 2B
208647_at	0.0285056	0.000894	-4.39	-0.523583	-1.66	FDFT1	farnesyl-diphosphate farnesyltransferase 1
205066_s_at	0.0285115	0.000896	-4.39	-0.525736	-1.7	ENPP1	ectonucleotide pyrophosphatase/phosphodiesterase 1
235667_at	0.0285115	0.000896	-4.39	-0.525941	-1.56	USP46-AS1	USP46 antisense RNA 1
219995_s_at	0.0285115	0.000896	-4.39	-0.526152	-3.74	ZNF750	zinc finger protein 750
202620_s_at	0.0285115	0.000897	4.39	-0.526271	3.41	PLOD2	procollagen-lysine,2-oxoglutarate 5-dioxygenase 2
209966_x_at	0.0285115	0.000897	-4.39	-0.526653	-2.96	ESRRG	estrogen related receptor gamma
218487_at	0.0285236	0.000898	-4.38	-0.527855	-2.04	ALAD	aminolevulinate dehydratase
237840_at	0.0285236	0.000898	-4.38	-0.528212	-1.57	LINC01118	long intergenic non-protein coding RNA 1118
206963_s_at	0.0285278	0.000899	-4.38	-0.529371	-3.52	NAT8B///NAT8	N-acetyltransferase 8B (putative, gene/pseudogene)///N-acetyltransferase 8 (putative)
204000_at	0.0285278	0.0009	-4.38	-0.529502	-1.7	GNB5	G protein subunit beta 5
201250_s_at	0.028539	0.000901	4.38	-0.531275	1.9	SLC2A1	solute carrier family 2 member 1
201932_at	0.028539	0.000901	4.38	-0.531629	1.84	LRRC41	leucine rich repeat containing 41
1555886_at	0.028539	0.000902	-4.38	-0.531691	-1.4	PDSS2	prenyl (decaprenyl) diphosphate synthase, subunit 2
228915_at	0.028539	0.000902	-4.38	-0.532591	-3.28	DACH1	dachshund family transcription factor 1
204909_at	0.028539	0.000903	-4.38	-0.532978	-1.83	DDX6	DEAD-box helicase 6
1556689_a_at	0.028539	0.000903	-4.38	-0.533306	-2.24	WNT4	Wnt family member 4
218498_s_at	0.0286773	0.000908	4.38	-0.538633	2.31	ERO1A	endoplasmic reticulum oxidoreductase 1 alpha
202627_s_at	0.0287338	0.000911	4.38	-0.542187	2.63	SERPINE1	serpin family E member 1
220948_s_at	0.0287338	0.000912	-4.38	-0.54309	-1.62	ATP1A1	ATPase Na+/K+ transporting subunit alpha 1
237178_at	0.0287338	0.000912	-4.38	-0.543284	-2.48	LOC102723932	uncharacterized LOC102723932
221269_s_at	0.0287338	0.000912	4.38	-0.543533	1.81	SH3BGRL3	SH3 domain binding glutamate rich protein like 3
241694_at	0.0287338	0.000913	-4.37	-0.544502	-3.52	PKHD1	polycystic kidney and hepatic disease 1 (autosomal recessive)
230626_at	0.0287338	0.000914	-4.37	-0.544739	-1.6	TSPAN12	tetraspanin 12
222917_s_at	0.0287338	0.000914	-4.37	-0.545104	-2.43	TBX3	T-box 3
236623_at	0.0287435	0.000915	-4.37	-0.546002	-2.35	ATP1A1-AS1	ATP1A1 antisense RNA 1
121_at	0.0287682	0.000916	-4.37	-0.547415	-1.53	PAX8	paired box 8
221576_at	0.0287685	0.000917	-4.37	-0.547989	-1.92	GDF15	growth differentiation factor 15
224860_at	0.0288155	0.000919	-4.37	-0.55016	-2	TMEM261	transmembrane protein 261
230631_s_at	0.0290952	0.000928	4.37	-0.560229	2.09	IL10RB-AS1	IL10RB antisense RNA 1 (head to head)
232717_at	0.0291017	0.000929	-4.37	-0.561015	-2.15	KALRN	kalirin, RhoGEF kinase
235512_at	0.0292944	0.000935	-4.36	-0.568073	-1.8	CDKL1	cyclin dependent kinase like 1
218677_at	0.0293279	0.000937	-4.36	-0.57017	-2.76	S100A14	S100 calcium binding protein A14
227497_at	0.0293279	0.000938	-4.36	-0.57058	-1.7	SOX6	SRY-box 6
1555307_at	0.0293279	0.000938	4.36	-0.571022	1.93	TTF2	transcription termination factor 2
206391_at	0.0293279	0.000939	4.36	-0.57145	3.2	RARRES1	retinoic acid receptor responder 1
204758_s_at	0.0294283	0.000944	-4.36	-0.576644	-2.06	C2CD2L	C2CD2 like
210423_s_at	0.0294283	0.000944	4.36	-0.576932	2.44	SLC11A1	solute carrier family 11 member 1
211465_x_at	0.0294283	0.000944	-4.36	-0.577458	-2.01	FUT6	fucosyltransferase 6
204731_at	0.0294283	0.000945	-4.36	-0.577576	-1.84	TGFBR3	transforming growth factor beta receptor 3
235771_at	0.0294283	0.000945	-4.36	-0.57762	-2.68	LINC00472	long intergenic non-protein coding RNA 472
210895_s_at	0.0295015	0.000948	4.35	-0.58073	2.64	CD86	CD86 molecule
209832_s_at	0.0295015	0.000948	4.35	-0.581471	2.2	CDT1	chromatin licensing and DNA replication factor 1
223821_s_at	0.0295015	0.000949	-4.35	-0.581743	-3.64	SUSD4	sushi domain containing 4
238762_at	0.0295097	0.00095	-4.35	-0.582846	-1.69	MTHFD2L	methylenetetrahydrofolate dehydrogenase (NADP+ dependent) 2-like
243115_at	0.0295097	0.00095	-4.35	-0.583224	-1.68	THCAT158	thyroid cancer-associated transcript 158
242809_at	0.0295097	0.000951	-4.35	-0.584497	-2.68	IL1RL1	interleukin 1 receptor like 1
205502_at	0.0295097	0.000952	-4.35	-0.584813	-4.34	CYP17A1	cytochrome P450 family 17 subfamily A member 1
225344_at	0.0295098	0.000952	-4.35	-0.585375	-1.8	NCOA7	nuclear receptor coactivator 7
1553179_at	0.0295162	0.000953	-4.35	-0.586285	-2.86	ADAMTS19	ADAM metallopeptidase with thrombospondin type 1 motif 19
232819_s_at	0.0295162	0.000953	-4.35	-0.586702	-2.03	LTBR	lymphotoxin beta receptor
234171_at	0.0295251	0.000955	-4.35	-0.588185	-2.51	LINC01267	long intergenic non-protein coding RNA 1267
204192_at	0.0295251	0.000955	4.35	-0.588669	3.43	CD37	CD37 molecule
236321_at	0.0295418	0.000956	-4.35	-0.589783	-2	FAM200B	family with sequence similarity 200 member B
211329_x_at	0.0295427	0.000957	4.35	-0.590431	1.77	HFE	hemochromatosis
236430_at	0.0295638	0.000959	-4.35	-0.592179	-1.76	TMED6	transmembrane p24 trafficking protein 6
230889_at	0.0295936	0.00096	-4.35	-0.593727	-3.18	LOC645321	uncharacterized LOC645321
227855_at	0.0296277	0.000962	-4.35	-0.595414	-1.48	ARHGEF40	Rho guanine nucleotide exchange factor 40
1554408_a_at	0.0296528	0.000963	4.34	-0.596979	1.66	TK1	thymidine kinase 1
239683_at	0.0296528	0.000964	-4.34	-0.597656	-1.69	CLYBL	citrate lyase beta like
230135_at	0.0296528	0.000964	-4.34	-0.597909	-2.75	HHIP	hedgehog interacting protein
214597_at	0.0296827	0.000966	-4.34	-0.599662	-1.98	SSTR2	somatostatin receptor 2
227139_s_at	0.0297898	0.00097	4.34	-0.604104	1.42	HPS3	HPS3, biogenesis of lysosomal organelles complex 2 subunit 1
211032_at	0.029799	0.000971	-4.34	-0.60496	-4.5	COBLL1	cordon-bleu WH2 repeat protein like 1
206209_s_at	0.0298488	0.000973	-4.34	-0.607155	-3.25	CA4	carbonic anhydrase 4
222692_s_at	0.0298729	0.000975	4.34	-0.6085	1.4	LOC101928615///FNDC3B	uncharacterized LOC101928615///fibronectin type III domain containing 3B
217711_at	0.0299214	0.000977	-4.34	-0.610648	-3.23	TEK	TEK receptor tyrosine kinase
219867_at	0.0299215	0.000978	-4.34	-0.612017	-2.31	CHODL	chondrolectin
1558971_at	0.0299215	0.000979	4.34	-0.612305	3.12	THEMIS	thymocyte selection associated
1558882_at	0.0299215	0.00098	4.33	-0.613412	1.55	HTATSF1P2	HIV-1 Tat specific factor 1 pseudogene 2
219738_s_at	0.0299215	0.00098	-4.33	-0.613419	-3.81	PCDH9	protocadherin 9
201860_s_at	0.0299215	0.00098	-4.33	-0.613753	-2.62	PLAT	plasminogen activator, tissue type
1557336_at	0.0299215	0.00098	-4.33	-0.61402	-2.22	SUCLG2-AS1	SUCLG2 antisense RNA 1 (head to head)
217681_at	0.0299215	0.000981	-4.33	-0.614501	-3.15	WNT7B	Wnt family member 7B
213925_at	0.0300477	0.000985	-4.33	-0.619192	-2.4	STUM	stum, mechanosensory transduction mediator homolog
229628_s_at	0.0300755	0.000987	-4.33	-0.620652	-1.53	CCDC180///LOC100499484-C9ORF174	coiled-coil domain containing 180///LOC100499484-C9orf174 readthrough
205632_s_at	0.0300838	0.000988	-4.33	-0.621472	-2.31	PIP5K1B	phosphatidylinositol-4-phosphate 5-kinase type 1 beta
222372_at	0.0301275	0.00099	-4.33	-0.62378	-2.44	MAGI1	membrane associated guanylate kinase, WW and PDZ domain containing 1
213010_at	0.0301275	0.00099	4.33	-0.623995	1.89	PRKCDBP	protein kinase C delta binding protein
214265_at	0.0301898	0.000993	-4.33	-0.627131	-1.78	ITGA8	integrin subunit alpha 8
1563454_at	0.0302159	0.000995	-4.33	-0.629065	-1.92	SOX6	SRY-box 6
1557769_at	0.0302231	0.000998	-4.32	-0.63124	-1.45	CHN2	chimerin 2
218021_at	0.0302231	0.000998	-4.32	-0.631936	-1.57	DHRS4L2///DHRS4	dehydrogenase/reductase 4 like 2///dehydrogenase/reductase 4
205907_s_at	0.0302231	0.000998	-4.32	-0.632197	-2.34	OMD	osteomodulin
205750_at	0.0302231	0.000999	-4.32	-0.632969	-2.13	BPHL	biphenyl hydrolase like
232512_at	0.0302231	0.000999	-4.32	-0.633113	-1.85	SCN3A	sodium voltage-gated channel alpha subunit 3
213923_at	0.030273	0.001	4.32	-0.635284	1.64	RAP2B	RAP2B, member of RAS oncogene family
236519_at	0.0303047	0.001	-4.32	-0.637023	-1.4	C9orf135	chromosome 9 open reading frame 135
212464_s_at	0.0303047	0.001	4.32	-0.6374	1.91	FN1	fibronectin 1
236945_at	0.0303088	0.001	-4.32	-0.638077	-1.35	CCDC171	coiled-coil domain containing 171
221703_at	0.0303727	0.00101	4.32	-0.641965	2.74	BRIP1	BRCA1 interacting protein C-terminal helicase 1
218261_at	0.0303727	0.00101	-4.32	-0.642127	-2.24	AP1M2	adaptor related protein complex 1 mu 2 subunit
1569383_s_at	0.0303727	0.00101	-4.32	-0.642835	-2.54	ZFYVE28	zinc finger FYVE-type containing 28
213589_s_at	0.0303727	0.00101	4.32	-0.642978	2.46	B3GNTL1	UDP-GlcNAc:betaGal beta-1,3-N-acetylglucosaminyltransferase-like 1
210289_at	0.0303727	0.00101	-4.32	-0.643121	-3.16	NAT8B///NAT8	N-acetyltransferase 8B (putative, gene/pseudogene)///N-acetyltransferase 8 (putative)
1569335_a_at	0.0303727	0.00101	-4.32	-0.6434	-2.44	STRA6	stimulated by retinoic acid 6
215303_at	0.0303968	0.00101	4.32	-0.644722	2.6	DCLK1	doublecortin like kinase 1
229893_at	0.0303993	0.00101	-4.32	-0.645791	-2.46	FRMD3	FERM domain containing 3
242301_at	0.0303993	0.00101	-4.32	-0.646115	-1.72	CBLN2	cerebellin 2 precursor
37117_at	0.0303993	0.00101	-4.32	-0.646426	-1.75	PRR5-ARHGAP8///ARHGAP8	PRR5-ARHGAP8 readthrough///Rho GTPase activating protein 8
221486_at	0.0304742	0.00102	-4.31	-0.649387	-1.55	ENSA	endosulfine alpha
228463_at	0.0305062	0.00102	-4.31	-0.65102	-2.69	FOXA3	forkhead box A3
211529_x_at	0.0305062	0.00102	4.31	-0.652358	1.92	HLA-G	major histocompatibility complex, class I, G
1558660_at	0.0305062	0.00102	4.31	-0.65255	1.91	LINC00703	long intergenic non-protein coding RNA 703
233022_at	0.0305208	0.00102	-4.31	-0.653584	-2.08	TRPM3	transient receptor potential cation channel subfamily M member 3
213348_at	0.030569	0.00102	-4.31	-0.655674	-2.76	CDKN1C	cyclin dependent kinase inhibitor 1C
235056_at	0.03065	0.00103	4.31	-0.658818	1.67	ETV6	ETS variant 6
209125_at	0.0307202	0.00103	-4.31	-0.661603	-2.62	KRT6A	keratin 6A
241476_at	0.0307378	0.00103	-4.31	-0.663343	-2.99	LOC105375115	uncharacterized LOC105375115
1559190_s_at	0.0307378	0.00103	4.31	-0.663555	2.25	RDH13	retinol dehydrogenase 13
207595_s_at	0.0307378	0.00103	4.31	-0.664291	2.37	BMP1	bone morphogenetic protein 1
237044_s_at	0.0307378	0.00103	-4.31	-0.664314	-1.91	ZNF503-AS2	ZNF503 antisense RNA 2
1558706_a_at	0.0307475	0.00103	-4.3	-0.665426	-1.92	ATOH8	atonal bHLH transcription factor 8
230964_at	0.0307475	0.00103	-4.3	-0.666269	-2.3	FREM2	FRAS1 related extracellular matrix protein 2
214770_at	0.0307475	0.00103	4.3	-0.666641	2.22	MSR1	macrophage scavenger receptor 1
208909_at	0.0307532	0.00104	-4.3	-0.668021	-1.48	UQCRFS1	ubiquinol-cytochrome c reductase, Rieske iron-sulfur polypeptide 1
222693_at	0.0307678	0.00104	4.3	-0.669022	1.84	LOC101928615///FNDC3B	uncharacterized LOC101928615///fibronectin type III domain containing 3B
223798_at	0.0307732	0.00104	4.3	-0.669807	1.51	SLC41A2	solute carrier family 41 member 2
207428_x_at	0.0307984	0.00104	4.3	-0.672029	1.9	CDK11A///CDK11B	cyclin dependent kinase 11A///cyclin dependent kinase 11B
236471_at	0.0307984	0.00104	4.3	-0.672134	1.81	NFE2L3	nuclear factor, erythroid 2 like 3
225930_at	0.0308023	0.00104	-4.3	-0.67279	-1.65	NKIRAS1	NFKB inhibitor interacting Ras like 1
233340_at	0.03085	0.00104	4.3	-0.674982	2.16	SPINK13	serine peptidase inhibitor, Kazal type 13 (putative)
1559705_s_at	0.03085	0.00104	4.3	-0.675506	2.11	PHKA2	phosphorylase kinase regulatory subunit alpha 2
207776_s_at	0.03085	0.00104	-4.3	-0.675953	-1.91	CACNB2	calcium voltage-gated channel auxiliary subunit beta 2
230741_at	0.03085	0.00104	4.3	-0.676442	3.18	P2RX7	purinergic receptor P2X 7
213447_at	0.0308688	0.00105	-4.3	-0.677821	-1.69	LOC101930404///SNORD116-28///SNORD115-26///SNORD115-13///SNORD115-7///SNORD116-22///SNORD116-4///PWARSN///SNORD107///SNRPN///IPW	uncharacterized LOC101930404///small nucleolar RNA, C/D box 116-28///small nucleolar RNA, C/D box 115-26///small nucleolar RNA, C/D box 115-13///small nucleolar RNA, C/D box 115-7///small nucleolar RNA, C/D box 116-22///small nucleolar RNA, C/D box 116-4///Prader Willi/Angelman region RNA, SNRPN neighbor///small nucleolar RNA, C/D box 107///small nuclear ribonucleoprotein polypeptide N///imprinte…
209681_at	0.0308952	0.00105	-4.3	-0.679534	-1.78	SLC19A2	solute carrier family 19 member 2
222885_at	0.0308952	0.00105	-4.3	-0.680754	-2.79	EMCN	endomucin
214774_x_at	0.0308952	0.00105	-4.3	-0.680874	-5.06	TOX3	TOX high mobility group box family member 3
206741_at	0.0308952	0.00105	-4.3	-0.681066	-3.09	SSUH2	ssu-2 homolog (C. elegans)
220183_s_at	0.0309125	0.00105	-4.3	-0.682146	-1.54	NUDT6	nudix hydrolase 6
222536_s_at	0.0309437	0.00105	4.29	-0.684198	2.09	ZNF395	zinc finger protein 395
238081_at	0.0309643	0.00105	-4.29	-0.68591	-2.4	WDFY3-AS2	WDFY3 antisense RNA 2
213071_at	0.0309707	0.00106	-4.29	-0.686641	-2.39	DPT	dermatopontin
221217_s_at	0.0309761	0.00106	-4.29	-0.687339	-1.65	RBFOX1	RNA binding protein, fox-1 homolog 1
216247_at	0.0309823	0.00106	-4.29	-0.688064	-1.66	SNORD54///RPS20	small nucleolar RNA, C/D box 54///ribosomal protein S20
217788_s_at	0.0309954	0.00106	4.29	-0.689646	2.11	GALNT2	polypeptide N-acetylgalactosaminyltransferase 2
239507_at	0.0309954	0.00106	-4.29	-0.690559	-2.19	LINC00608	long intergenic non-protein coding RNA 608
201247_at	0.0309954	0.00106	-4.29	-0.690741	-3.03	SREBF2	sterol regulatory element binding transcription factor 2
209465_x_at	0.0309954	0.00106	-4.29	-0.691496	-3.18	PTN	pleiotrophin
1555648_at	0.0309954	0.00106	4.29	-0.691836	1.86	FOXP2	forkhead box P2
224225_s_at	0.0309954	0.00106	4.29	-0.692167	2.3	ETV7	ETS variant 7
219509_at	0.0310497	0.00106	-4.29	-0.694575	-1.84	MYOZ1	myozenin 1
1556355_x_at	0.0310497	0.00107	-4.29	-0.696523	-2.47	RGL3	ral guanine nucleotide dissociation stimulator like 3
1552717_s_at	0.0310497	0.00107	4.29	-0.696636	1.85	CEP170P1///CEP170	centrosomal protein 170 pseudogene 1///centrosomal protein 170
219655_at	0.0310497	0.00107	-4.29	-0.697162	-2.19	SUGCT	succinyl-CoA:glutarate-CoA transferase
238454_at	0.0310497	0.00107	-4.29	-0.697642	-2.25	ZNF540	zinc finger protein 540
234506_at	0.0310497	0.00107	-4.29	-0.69794	-1.96	LOC101929180	uncharacterized LOC101929180
216066_at	0.0310497	0.00107	4.29	-0.698305	2.69	ABCA1	ATP binding cassette subfamily A member 1
1553602_at	0.0310497	0.00107	-4.29	-0.698614	-1.86	MUCL1	mucin like 1
226804_at	0.0310497	0.00107	4.29	-0.69913	1.84	FAM20A	family with sequence similarity 20 member A
1560446_at	0.0310537	0.00107	-4.28	-0.700022	-1.74	IPO5P1	importin 5 pseudogene 1
1558193_at	0.0310537	0.00107	-4.28	-0.700302	-2	ANKRD54	ankyrin repeat domain 54
203054_s_at	0.031085	0.00107	-4.28	-0.701813	-1.84	TCTA	T-cell leukemia translocation altered
202897_at	0.031122	0.00107	4.28	-0.703507	1.74	SIRPA	signal regulatory protein alpha
204825_at	0.0311264	0.00107	4.28	-0.704167	2.78	MELK	maternal embryonic leucine zipper kinase
1563542_a_at	0.0311672	0.00108	-4.28	-0.706405	-2.11	SCML4	sex comb on midleg-like 4 (Drosophila)
214497_s_at	0.0311672	0.00108	-4.28	-0.706498	-1.84	NHLH2	nescient helix-loop-helix 2
210198_s_at	0.0311697	0.00108	-4.28	-0.707097	-3.07	PLP1	proteolipid protein 1
215194_at	0.0311719	0.00108	-4.28	-0.707688	-2.34	PRKCA	protein kinase C alpha
234936_s_at	0.031218	0.00108	-4.28	-0.709954	-1.5	CC2D2A	coiled-coil and C2 domain containing 2A
230645_at	0.0312212	0.00108	-4.28	-0.710803	-2.28	FRMD3	FERM domain containing 3
205399_at	0.0312665	0.00108	4.28	-0.712748	2.41	DCLK1	doublecortin like kinase 1
238624_at	0.0313436	0.00109	-4.28	-0.715928	-1.67	LOC102724517///NLK	uncharacterized LOC102724517///nemo like kinase
1555310_a_at	0.031398	0.00109	-4.27	-0.718952	-1.93	PAK6	p21 (RAC1) activated kinase 6
205712_at	0.0314223	0.00109	-4.27	-0.720228	-2.89	PTPRD	protein tyrosine phosphatase, receptor type D
202672_s_at	0.0314563	0.00109	-4.27	-0.722003	-2.24	ATF3	activating transcription factor 3
1565026_a_at	0.0314563	0.00109	-4.27	-0.722328	-2.6	OFCC1	orofacial cleft 1 candidate 1
212501_at	0.0314657	0.0011	4.27	-0.72314	1.83	CEBPB	CCAAT/enhancer binding protein beta
214615_at	0.0314826	0.0011	4.27	-0.724185	2.45	P2RY10	purinergic receptor P2Y10
228400_at	0.0315006	0.0011	-4.27	-0.725428	-3.56	SHROOM3	shroom family member 3
226075_at	0.0315006	0.0011	4.27	-0.72578	1.72	SPSB1	splA/ryanodine receptor domain and SOCS box containing 1
241424_at	0.0315166	0.0011	-4.27	-0.726796	-2.37	ELAVL4	ELAV like neuron-specific RNA binding protein 4
202468_s_at	0.0315319	0.0011	-4.27	-0.727992	-1.89	CTNNAL1	catenin alpha like 1
215843_s_at	0.0315319	0.0011	-4.27	-0.728452	-2.34	TLL2	tolloid like 2
224879_at	0.0315329	0.0011	-4.27	-0.729363	-1.29	TMEM261	transmembrane protein 261
200831_s_at	0.0315332	0.0011	4.27	-0.729887	2.57	SCD	stearoyl-CoA desaturase
215210_s_at	0.0315699	0.00111	-4.27	-0.731971	-1.88	DLST	dihydrolipoamide S-succinyltransferase
204924_at	0.0315699	0.00111	4.27	-0.732061	2.55	TLR2	toll like receptor 2
216918_s_at	0.031581	0.00111	-4.27	-0.733863	-1.91	DST	dystonin
227323_at	0.031581	0.00111	-4.26	-0.735404	-1.67	COX4I1	cytochrome c oxidase subunit 4I1
239349_at	0.031581	0.00111	-4.26	-0.735727	-3.11	C1QTNF7	C1q and tumor necrosis factor related protein 7
210921_at	0.031581	0.00111	-4.26	-0.736052	-2.64	LOC101929078	myb-related transcription factor, partner of profilin-like
242638_at	0.031581	0.00111	-4.26	-0.736089	-3.22	LOC101928731	uncharacterized LOC101928731
210513_s_at	0.031581	0.00111	4.26	-0.736328	1.89	VEGFA	vascular endothelial growth factor A
205818_at	0.031581	0.00111	-4.26	-0.736805	-1.98	BRINP1	BMP/retinoic acid inducible neural specific 1
202081_at	0.031581	0.00111	-4.26	-0.737533	-1.71	IER2	immediate early response 2
210199_at	0.031581	0.00111	-4.26	-0.737546	-4.08	CRYAA	crystallin alpha A
208607_s_at	0.031581	0.00111	4.26	-0.738203	4.74	SAA2-SAA4///SAA2///SAA1	SAA2-SAA4 readthrough///serum amyloid A2///serum amyloid A1
240298_at	0.031581	0.00111	-4.26	-0.738311	-1.96	LOC147791	uncharacterized LOC147791
214162_at	0.0316236	0.00111	-4.26	-0.740393	-2.49	ASXL3	additional sex combs like 3, transcriptional regulator
232364_at	0.0316358	0.00112	-4.26	-0.741281	-2.91	LOC100506235	uncharacterized LOC100506235
210832_x_at	0.0316761	0.00112	-4.26	-0.743228	-2.09	PTGER3	prostaglandin E receptor 3
219682_s_at	0.0316761	0.00112	-4.26	-0.743644	-2.56	TBX3	T-box 3
202075_s_at	0.0316761	0.00112	4.26	-0.744064	2.12	PLTP	phospholipid transfer protein
230776_at	0.0317116	0.00112	-4.26	-0.745675	-3.38	RNF157-AS1	RNF157 antisense RNA 1
239568_at	0.0317146	0.00112	-4.26	-0.746276	-2.45	PLEKHH2	pleckstrin homology, MyTH4 and FERM domain containing H2
203632_s_at	0.031724	0.00112	-4.26	-0.747076	-1.9	GPRC5B	G protein-coupled receptor class C group 5 member B
216727_at	0.0318577	0.00113	-4.25	-0.752229	-1.85	STK38	serine/threonine kinase 38
221018_s_at	0.0318825	0.00113	-4.25	-0.753505	-3.21	TDRD1	tudor domain containing 1
1563632_at	0.0319096	0.00113	-4.25	-0.754849	-1.89	TMEM72-AS1	TMEM72 antisense RNA 1
202026_at	0.0320161	0.00114	-4.25	-0.758716	-1.31	SDHD	succinate dehydrogenase complex subunit D
228568_at	0.0320161	0.00114	-4.25	-0.75914	-1.65	MYZAP	myocardial zonula adherens protein
229940_at	0.0320605	0.00114	-4.25	-0.761009	-1.77	SETD3	SET domain containing 3
213172_at	0.0321552	0.00114	-4.25	-0.764845	-3.42	TTC9	tetratricopeptide repeat domain 9
205366_s_at	0.0321552	0.00114	-4.25	-0.765405	-2.69	HOXB6	homeobox B6
207683_at	0.0321552	0.00114	-4.25	-0.766621	-1.69	FOXN1	forkhead box N1
1559093_at	0.0321552	0.00114	-4.25	-0.766749	-1.65	LINC01530	long intergenic non-protein coding RNA 1530
244037_at	0.0321552	0.00115	-4.25	-0.766946	-1.88	LOC100507520	uncharacterized LOC100507520
235854_x_at	0.032203	0.00115	-4.24	-0.769209	-1.94	ROCK1	Rho associated coiled-coil containing protein kinase 1
242388_x_at	0.032203	0.00115	4.24	-0.769925	2.83	TAGAP	T-cell activation RhoGTPase activating protein
226590_at	0.032203	0.00115	-4.24	-0.77021	-1.58	ZNF618	zinc finger protein 618
233547_x_at	0.032203	0.00115	-4.24	-0.77102	-2.92	PDE1A	phosphodiesterase 1A
237400_at	0.032203	0.00115	-4.24	-0.771067	-1.81	ATP5S	ATP synthase, H+ transporting, mitochondrial Fo complex subunit s (factor B)
235735_at	0.032203	0.00115	4.24	-0.771435	1.41	TNFSF8	tumor necrosis factor superfamily member 8
210610_at	0.0322585	0.00115	-4.24	-0.773634	-2.33	CEACAM1	carcinoembryonic antigen related cell adhesion molecule 1
202204_s_at	0.0322616	0.00115	-4.24	-0.774273	-1.58	AMFR	autocrine motility factor receptor
239921_at	0.0322616	0.00115	-4.24	-0.774848	-3.62	COL28A1	collagen type XXVIII alpha 1 chain
231019_x_at	0.0322616	0.00115	-4.24	-0.775234	-2.04	CBARP	CACN beta subunit associated regulatory protein
210652_s_at	0.0322655	0.00116	4.24	-0.777567	1.68	TTC39A	tetratricopeptide repeat domain 39A
205269_at	0.0322655	0.00116	4.24	-0.777783	2.15	LCP2	lymphocyte cytosolic protein 2
224998_at	0.0322812	0.00116	-4.24	-0.779091	-1.82	CMTM4	CKLF like MARVEL transmembrane domain containing 4
213486_at	0.0322812	0.00116	-4.24	-0.779724	-2.45	COPG2IT1	COPG2 imprinted transcript 1 (non-protein coding)
207424_at	0.0322812	0.00116	-4.24	-0.780145	-3.14	MYF5	myogenic factor 5
230990_at	0.0322812	0.00116	-4.24	-0.780345	-2.16	KIF13A	kinesin family member 13A
1567022_at	0.032399	0.00117	-4.24	-0.785428	-2.71	OR5AK4P	olfactory receptor family 5 subfamily AK member 4 pseudogene
217568_at	0.0325412	0.00117	-4.23	-0.790237	-3.71	EDDM3A	epididymal protein 3A
230174_at	0.032552	0.00117	-4.23	-0.791062	-1.78	LYPLAL1	lysophospholipase like 1
210631_at	0.0326036	0.00118	-4.23	-0.793119	-2.28	NF1P9///NF1	neurofibromin 1 pseudogene 9///neurofibromin 1
212977_at	0.0326498	0.00118	4.23	-0.795011	2.29	ACKR3	atypical chemokine receptor 3
214857_at	0.0326847	0.00118	-4.23	-0.796559	-1.36	RPARP-AS1	RPARP antisense RNA 1
228692_at	0.0326968	0.00118	4.23	-0.797422	2.52	PREX2	phosphatidylinositol-3,4,5-trisphosphate dependent Rac exchange factor 2
213537_at	0.0327085	0.00118	4.23	-0.79827	2.06	HLA-DPA1	major histocompatibility complex, class II, DP alpha 1
219732_at	0.0327437	0.00118	-4.23	-0.799827	-4.39	PLPPR1	phospholipid phosphatase related 1
242587_at	0.0327469	0.00118	4.23	-0.800419	2.64	SLC9A9	solute carrier family 9 member A9
224996_at	0.0328061	0.00119	4.23	-0.802847	2.18	ASPH	aspartate beta-hydroxylase
206214_at	0.0328061	0.00119	4.23	-0.803191	2.3	PLA2G7	phospholipase A2 group VII
207610_s_at	0.032932	0.00119	4.22	-0.807952	1.97	ADGRE2	adhesion G protein-coupled receptor E2
209506_s_at	0.0329357	0.0012	-4.22	-0.809053	-2.06	NR2F2///NR2F1	nuclear receptor subfamily 2 group F member 2///nuclear receptor subfamily 2 group F member 1
230308_at	0.0329516	0.0012	-4.22	-0.810024	-2.27	FAM120AOS	family with sequence similarity 120A opposite strand
228237_at	0.0329683	0.0012	-4.22	-0.811018	-3.24	PAPPA2	pappalysin 2
215091_s_at	0.0330943	0.0012	4.22	-0.815759	1.27	GTF3A	general transcription factor IIIA
235920_at	0.0331434	0.00121	-4.22	-0.817711	-1.95	CLUHP3///ZNF720	clustered mitochondria homolog pseudogene 3///zinc finger protein 720
1554875_at	0.0331621	0.00121	-4.22	-0.818795	-3.2	CAMKMT	calmodulin-lysine N-methyltransferase
202708_s_at	0.0331621	0.00121	-4.22	-0.820189	-2.07	HIST2H2BE	histone cluster 2, H2be
215025_at	0.0331621	0.00121	-4.22	-0.820195	-2.2	NTRK3	neurotrophic receptor tyrosine kinase 3
214641_at	0.0331621	0.00121	-4.22	-0.820509	-3.1	COL4A3	collagen type IV alpha 3 chain
231166_at	0.0331621	0.00121	-4.22	-0.820735	-1.78	GPR155	G protein-coupled receptor 155
240342_at	0.0331916	0.00121	-4.21	-0.822951	-2.12	TRIM61	tripartite motif containing 61
201150_s_at	0.0331916	0.00121	-4.21	-0.823466	-2.56	TIMP3	TIMP metallopeptidase inhibitor 3
236608_at	0.0331916	0.00121	-4.21	-0.823556	-3.43	ADGRF3	adhesion G protein-coupled receptor F3
225822_at	0.0331916	0.00121	-4.21	-0.823704	-2.9	TMEM125	transmembrane protein 125
216116_at	0.0331916	0.00121	-4.21	-0.824073	-1.55	CELSR3-AS1	CELSR3 antisense RNA 1 (head to head)
236800_at	0.0332264	0.00122	-4.21	-0.82637	-3.08	UCMA	upper zone of growth plate and cartilage matrix associated
220376_at	0.0332264	0.00122	-4.21	-0.826537	-3.12	LRRC19	leucine rich repeat containing 19
207224_s_at	0.0332264	0.00122	4.21	-0.826579	1.5	SIGLEC7	sialic acid binding Ig like lectin 7
206453_s_at	0.0332271	0.00122	-4.21	-0.827092	-2.16	NDRG2	NDRG family member 2
231703_s_at	0.0332715	0.00122	-4.21	-0.828895	-2.22	ADH4	alcohol dehydrogenase 4 (class II), pi polypeptide
236553_at	0.0332802	0.00122	-4.21	-0.829644	-2.37	LOC100507520	uncharacterized LOC100507520
236790_s_at	0.0332837	0.00122	-4.21	-0.830263	-1.6	MAPT-AS1	MAPT antisense RNA 1
1560320_a_at	0.0332837	0.00122	4.21	-0.830727	1.69	C1RL-AS1	C1RL antisense RNA 1
240589_at	0.033294	0.00122	-4.21	-0.831522	-2.55	LINC00313	long intergenic non-protein coding RNA 313
224344_at	0.0334238	0.00123	-4.21	-0.836327	-1.86	COX6A1	cytochrome c oxidase subunit 6A1
209696_at	0.0335602	0.00123	-4.2	-0.840852	-2.71	FBP1	fructose-bisphosphatase 1
216781_at	0.0335602	0.00124	-4.2	-0.841751	-1.8	CFAP74	cilia and flagella associated protein 74
206176_at	0.0335602	0.00124	-4.2	-0.841798	-2.11	BMP6	bone morphogenetic protein 6
230883_at	0.0335665	0.00124	-4.2	-0.842494	-3.89	NXPH2	neurexophilin 2
220699_s_at	0.0335665	0.00124	-4.2	-0.842962	-1.73	PRO2214	uncharacterized protein PRO2214
241977_s_at	0.0335963	0.00124	-4.2	-0.84432	-2.4	RAB3C	RAB3C, member RAS oncogene family
208022_s_at	0.0336049	0.00124	-4.2	-0.845958	-1.54	CDC14B	cell division cycle 14B
209270_at	0.0336049	0.00124	4.2	-0.8463	2.35	LAMB3	laminin subunit beta 3
1559412_at	0.0336332	0.00124	-4.2	-0.847837	-2.49	MIR99AHG	mir-99a-let-7c cluster host gene
227756_at	0.0336523	0.00125	-4.2	-0.849533	-1.44	FAM81A	family with sequence similarity 81 member A
211366_x_at	0.0336523	0.00125	4.2	-0.849854	1.67	CASP1	caspase 1
229073_at	0.0336827	0.00125	-4.2	-0.851227	-2.19	PRTG	protogenin
222848_at	0.0336873	0.00125	4.2	-0.851849	3.07	CENPK	centromere protein K
202242_at	0.0337203	0.00125	-4.2	-0.853522	-2.47	TSPAN7	tetraspanin 7
219388_at	0.0337203	0.00125	-4.2	-0.853781	-3.25	GRHL2	grainyhead like transcription factor 2
214433_s_at	0.033741	0.00125	-4.2	-0.855616	-1.98	SELENBP1	selenium binding protein 1
211889_x_at	0.033741	0.00125	-4.2	-0.856041	-2.59	CEACAM1	carcinoembryonic antigen related cell adhesion molecule 1
207180_s_at	0.033741	0.00125	4.2	-0.856237	1.86	HTATIP2	HIV-1 Tat interactive protein 2
241401_at	0.033741	0.00125	-4.19	-0.856674	-2.3	WDFY3-AS2	WDFY3 antisense RNA 2
202827_s_at	0.033741	0.00125	4.19	-0.856805	2.5	MMP14	matrix metallopeptidase 14
220823_at	0.0337895	0.00126	-4.19	-0.860044	-2.68	LOC729164	hCG1732469
221662_s_at	0.0337895	0.00126	-4.19	-0.861006	-2.71	SLC22A7	solute carrier family 22 member 7
229796_at	0.0337895	0.00126	-4.19	-0.861591	-3.67	SIX4	SIX homeobox 4
203290_at	0.0337895	0.00126	4.19	-0.861867	2.96	HLA-DQA1	major histocompatibility complex, class II, DQ alpha 1
229292_at	0.0337895	0.00126	-4.19	-0.861991	-2.18	EPB41L5	erythrocyte membrane protein band 4.1 like 5
214811_at	0.0337895	0.00126	-4.19	-0.86208	-3.9	RIMBP2	RIMS binding protein 2
203997_at	0.0338034	0.00126	-4.19	-0.862966	-1.59	PTPN3	protein tyrosine phosphatase, non-receptor type 3
208470_s_at	0.0338355	0.00126	4.19	-0.864521	4.85	HPR///HP	haptoglobin-related protein///haptoglobin
229183_at	0.0338355	0.00127	-4.19	-0.86523	-1.75	KCTD1	potassium channel tetramerization domain containing 1
1555250_a_at	0.0338355	0.00127	-4.19	-0.865344	-2.03	CPEB3	cytoplasmic polyadenylation element binding protein 3
230962_at	0.0338599	0.00127	4.19	-0.86723	3.72	DCLK1	doublecortin like kinase 1
222958_s_at	0.0338599	0.00127	4.19	-0.867495	1.85	DEPDC1	DEP domain containing 1
223280_x_at	0.0338906	0.00127	4.19	-0.870626	2.29	MS4A6A	membrane spanning 4-domains A6A
214532_x_at	0.0338906	0.00127	4.19	-0.870648	1.85	POU5F1B	POU class 5 homeobox 1B
239388_at	0.0338906	0.00127	4.19	-0.870805	1.47	RNASET2	ribonuclease T2
232996_at	0.0338906	0.00127	-4.19	-0.871683	-1.81	CCDC120	coiled-coil domain containing 120
215465_at	0.0338906	0.00127	4.19	-0.871928	3.48	ABCA12	ATP binding cassette subfamily A member 12
219386_s_at	0.0338906	0.00127	4.19	-0.872438	1.96	SLAMF8	SLAM family member 8
228503_at	0.0338906	0.00128	-4.19	-0.8727	-2.72	RPS6KA6	ribosomal protein S6 kinase A6
204222_s_at	0.0338933	0.00128	4.18	-0.873732	1.69	GLIPR1	GLI pathogenesis related 1
224432_at	0.0339555	0.00128	-4.18	-0.876488	-2.27	SH3GLB2	SH3 domain containing GRB2 like endophilin B2
209708_at	0.0340079	0.00128	-4.18	-0.878483	-1.7	MOXD1	monooxygenase DBH like 1
238326_at	0.0340883	0.00129	-4.18	-0.882027	-2.12	ODF3B	outer dense fiber of sperm tails 3B
212314_at	0.0340883	0.00129	4.18	-0.88223	1.74	SEL1L3	SEL1L family member 3
225415_at	0.0340883	0.00129	4.18	-0.882233	1.82	DTX3L	deltex E3 ubiquitin ligase 3L
227279_at	0.0340908	0.00129	-4.18	-0.882783	-1.4	TCEAL3	transcription elongation factor A like 3
214511_x_at	0.0341196	0.00129	4.18	-0.884353	2.02	FCGR1B	Fc fragment of IgG receptor Ib
221211_s_at	0.0341337	0.00129	4.18	-0.885447	2.7	MAP3K7CL	MAP3K7 C-terminal like
1569847_at	0.0341513	0.00129	-4.18	-0.886429	-1.34	LOC101930349///LOC101930344///CGNL1	uncharacterized LOC101930349///uncharacterized LOC101930344///cingulin like 1
214274_s_at	0.0341956	0.0013	-4.18	-0.888178	-1.82	ACAA1	acetyl-CoA acyltransferase 1
212478_at	0.0342688	0.0013	-4.18	-0.890757	-2.27	RMND5A	required for meiotic nuclear division 5 homolog A
225834_at	0.0342901	0.0013	4.17	-0.892724	2.32	FAM72A///FAM72D///FAM72B///FAM72C	family with sequence similarity 72 member A///family with sequence similarity 72 member D///family with sequence similarity 72 member B///family with sequence similarity 72 member C
207241_at	0.0342901	0.0013	4.17	-0.892788	3.22	LINC01587	long intergenic non-protein coding RNA 1587
205016_at	0.0342984	0.0013	4.17	-0.893502	1.63	TGFA	transforming growth factor alpha
203088_at	0.0343074	0.0013	-4.17	-0.894232	-3.25	FBLN5	fibulin 5
214192_at	0.0343303	0.0013	-4.17	-0.895362	-2.91	NUP88	nucleoporin 88
209292_at	0.0343606	0.00131	-4.17	-0.897083	-2.55	ID4	inhibitor of DNA binding 4, HLH protein
235977_at	0.0343606	0.00131	-4.17	-0.897176	-1.46	LONRF2	LON peptidase N-terminal domain and ring finger 2
217387_at	0.0343975	0.00131	-4.17	-0.898704	-1.84	CAPN6	calpain 6
227769_at	0.0344444	0.00131	-4.17	-0.900514	-2.63	GPR27	G protein-coupled receptor 27
214681_at	0.034467	0.00131	-4.17	-0.901632	-1.79	GK	glycerol kinase
207054_at	0.0345015	0.00132	-4.17	-0.903303	-3.29	IMPG1	interphotoreceptor matrix proteoglycan 1
210942_s_at	0.0345015	0.00132	-4.17	-0.904418	-1.62	ST3GAL6	ST3 beta-galactoside alpha-2,3-sialyltransferase 6
227944_at	0.0345015	0.00132	-4.17	-0.904453	-1.62	PTPN3	protein tyrosine phosphatase, non-receptor type 3
1558124_at	0.0345015	0.00132	4.17	-0.904504	2.13	NUDCD2	NudC domain containing 2
1564460_at	0.0345283	0.00132	-4.17	-0.906052	-1.51	LINC01281	long intergenic non-protein coding RNA 1281
214303_x_at	0.0345283	0.00132	-4.17	-0.906209	-2.05	MUC5AC	mucin 5AC, oligomeric mucus/gel-forming
1552549_a_at	0.0345537	0.00132	-4.17	-0.907678	-2.59	BSND	barttin CLCNK type accessory beta subunit
233919_s_at	0.0345537	0.00132	-4.17	-0.907927	-1.61	HABP4	hyaluronan binding protein 4
239684_at	0.0345537	0.00132	-4.16	-0.908681	-1.95	TRPM3	transient receptor potential cation channel subfamily M member 3
235282_at	0.0345537	0.00132	-4.16	-0.908813	-1.51	LOC102724532///SP2-AS1	uncharacterized LOC102724532///SP2 antisense RNA 1
218641_at	0.0345555	0.00132	-4.16	-0.909332	-1.64	C11orf95	chromosome 11 open reading frame 95
239647_at	0.0345628	0.00132	4.16	-0.910011	1.83	CHST13	carbohydrate sulfotransferase 13
217583_at	0.0345647	0.00133	-4.16	-0.910886	-4.34	LOC101929036///PAH	uncharacterized LOC101929036///phenylalanine hydroxylase
206251_s_at	0.0345647	0.00133	-4.16	-0.912115	-1.81	AVPR1A	arginine vasopressin receptor 1A
212998_x_at	0.0345647	0.00133	4.16	-0.91248	2.65	LOC101060835///HLA-DQB1	HLA class II histocompatibility antigen, DQ beta 1 chain-like///major histocompatibility complex, class II, DQ beta 1
233439_at	0.0345647	0.00133	-4.16	-0.912742	-2.71	LETM1	leucine zipper and EF-hand containing transmembrane protein 1
221256_s_at	0.0345662	0.00133	-4.16	-0.913388	-1.56	HDHD3	haloacid dehalogenase like hydrolase domain containing 3
1553147_at	0.0345751	0.00133	-4.16	-0.914107	-4.22	RANBP3L	RAN binding protein 3 like
223895_s_at	0.034659	0.00133	-4.16	-0.916958	-3.33	EPN3	epsin 3
231859_at	0.0346596	0.00134	-4.16	-0.918974	-2.54	C14orf132	chromosome 14 open reading frame 132
240362_at	0.0346596	0.00134	-4.16	-0.919281	-2.44	MPC1	mitochondrial pyruvate carrier 1
1553159_at	0.0346596	0.00134	4.16	-0.919307	2.25	DNAH11	dynein axonemal heavy chain 11
202628_s_at	0.034717	0.00134	4.16	-0.923058	3.32	SERPINE1	serpin family E member 1
231609_at	0.034717	0.00134	-4.16	-0.923329	-2.22	C10orf82	chromosome 10 open reading frame 82
211896_s_at	0.034717	0.00134	-4.16	-0.923749	-2.93	DCN	decorin
236890_at	0.034717	0.00134	-4.16	-0.923947	-2.49	MTG2	mitochondrial ribosome associated GTPase 2
231216_at	0.034717	0.00134	-4.16	-0.923953	-1.79	TMEM179	transmembrane protein 179
226688_at	0.034717	0.00134	-4.16	-0.92487	-1.58	TCAIM	T-cell activation inhibitor, mitochondrial
218541_s_at	0.034717	0.00134	-4.16	-0.924871	-3.15	C8orf4	chromosome 8 open reading frame 4
1557212_at	0.034717	0.00134	-4.16	-0.925163	-1.55	EIF1B-AS1	EIF1B antisense RNA 1
202740_at	0.034717	0.00135	-4.16	-0.925271	-3.28	ABHD14A-ACY1///ACY1	ABHD14A-ACY1 readthrough///aminoacylase 1
206697_s_at	0.034717	0.00135	4.16	-0.925588	4.92	HP	haptoglobin
229005_at	0.0347489	0.00135	4.15	-0.927443	2.43	MCTP2	multiple C2 and transmembrane domain containing 2
233599_at	0.034769	0.00135	-4.15	-0.929127	-1.71	LOC728061	hCG2003663
241118_at	0.034769	0.00135	4.15	-0.929375	2.5	LINC00462	long intergenic non-protein coding RNA 462
206993_at	0.0347732	0.00135	-4.15	-0.930085	-1.36	ATP5S	ATP synthase, H+ transporting, mitochondrial Fo complex subunit s (factor B)
215027_at	0.0347732	0.00135	-4.15	-0.930421	-2.43	RAPGEF3	Rap guanine nucleotide exchange factor 3
244771_at	0.0347786	0.00135	-4.15	-0.931036	-2.4	KBTBD12	kelch repeat and BTB domain containing 12
239752_at	0.0349036	0.00136	-4.15	-0.935091	-2.65	CECR2	CECR2, histone acetyl-lysine reader
210512_s_at	0.0349036	0.00136	4.15	-0.936725	1.48	VEGFA	vascular endothelial growth factor A
238062_at	0.0349036	0.00136	-4.15	-0.936815	-3.32	GPIHBP1	glycosylphosphatidylinositol anchored high density lipoprotein binding protein 1
202803_s_at	0.0349036	0.00136	4.15	-0.937264	2.56	ITGB2	integrin subunit beta 2
201743_at	0.0349036	0.00136	4.15	-0.937286	1.58	CD14	CD14 molecule
213582_at	0.0349036	0.00136	4.15	-0.937332	1.39	ATP11A	ATPase phospholipid transporting 11A
208368_s_at	0.0349292	0.00136	4.15	-0.938514	2.46	BRCA2	BRCA2, DNA repair associated
202054_s_at	0.034961	0.00137	-4.15	-0.939869	-1.97	ALDH3A2	aldehyde dehydrogenase 3 family member A2
229480_at	0.0350008	0.00137	-4.15	-0.942136	-2.01	MAGI2-AS3	MAGI2 antisense RNA 3
222835_at	0.0350008	0.00137	-4.15	-0.942241	-2.02	THSD4	thrombospondin type 1 domain containing 4
220239_at	0.0350008	0.00137	4.15	-0.942368	1.55	KLHL7	kelch like family member 7
227000_at	0.0350195	0.00137	-4.15	-0.943353	-2.07	MTURN	maturin, neural progenitor differentiation regulator homolog (Xenopus)
223307_at	0.0351294	0.00138	4.14	-0.947353	1.47	CDCA3	cell division cycle associated 3
219204_s_at	0.0351393	0.00138	-4.14	-0.948088	-1.42	SRR	serine racemase
203409_at	0.0351721	0.00138	4.14	-0.949923	1.76	DDB2	damage specific DNA binding protein 2
216837_at	0.0351924	0.00138	-4.14	-0.950948	-2.47	EPHA5	EPH receptor A5
220270_at	0.0352091	0.00138	-4.14	-0.952092	-2.83	RNF17	ring finger protein 17
220769_s_at	0.0352091	0.00138	-4.14	-0.952332	-1.52	WDR78	WD repeat domain 78
203631_s_at	0.0352441	0.00139	-4.14	-0.954087	-2.88	GPRC5B	G protein-coupled receptor class C group 5 member B
232693_s_at	0.0352441	0.00139	4.14	-0.954225	2.57	FBXO16///ZNF395	F-box protein 16///zinc finger protein 395
236473_at	0.0353045	0.00139	-4.14	-0.956366	-1.75	CC2D2A	coiled-coil and C2 domain containing 2A
1559034_at	0.0353066	0.00139	4.14	-0.956881	2.42	SIRPB2	signal regulatory protein beta 2
213714_at	0.0353163	0.00139	-4.14	-0.957607	-2.84	CACNB2	calcium voltage-gated channel auxiliary subunit beta 2
210414_at	0.0354181	0.00139	-4.14	-0.960895	-2.82	FLRT1	fibronectin leucine rich transmembrane protein 1
243650_at	0.0355111	0.0014	-4.13	-0.964727	-1.87	PLEKHH2	pleckstrin homology, MyTH4 and FERM domain containing H2
229764_at	0.0355111	0.0014	4.13	-0.96484	2.09	TPRG1	tumor protein p63 regulated 1
224589_at	0.0355556	0.0014	-4.13	-0.966983	-2.21	XIST	X inactive specific transcript (non-protein coding)
210807_s_at	0.0355818	0.00141	-4.13	-0.968164	-1.91	SLC16A7	solute carrier family 16 member 7
1563933_a_at	0.0356502	0.00141	-4.13	-0.970506	-3.57	PLD5	phospholipase D family member 5
226065_at	0.035667	0.00141	-4.13	-0.97158	-1.56	PRICKLE1	prickle planar cell polarity protein 1
208813_at	0.035667	0.00141	-4.13	-0.971881	-2.03	GOT1	glutamic-oxaloacetic transaminase 1
228969_at	0.0357113	0.00141	-4.13	-0.973554	-2.42	AGR2	anterior gradient 2, protein disulphide isomerase family member
201482_at	0.0357473	0.00141	4.13	-0.974999	1.88	QSOX1	quiescin sulfhydryl oxidase 1
1561386_at	0.0357775	0.00142	-4.13	-0.976282	-2.34	LOC102723701	uncharacterized LOC102723701
233337_s_at	0.0358223	0.00142	4.13	-0.977967	2.57	SEZ6L2	seizure related 6 homolog like 2
230391_at	0.0358559	0.00142	4.12	-0.979344	2.3	CD84	CD84 molecule
206077_at	0.0358571	0.00142	-4.12	-0.979829	-1.49	KEL	Kell blood group, metallo-endopeptidase
209083_at	0.0358983	0.00142	4.12	-0.981411	1.88	CORO1A	coronin 1A
227847_at	0.0359617	0.00143	-4.12	-0.9836	-1.66	EPM2AIP1	EPM2A interacting protein 1
208966_x_at	0.0359713	0.00143	4.12	-0.984315	2.16	IFI16	interferon gamma inducible protein 16
207076_s_at	0.0360057	0.00143	-4.12	-0.985707	-2.61	ASS1	argininosuccinate synthase 1
207761_s_at	0.0360488	0.00143	-4.12	-0.987335	-1.57	METTL7A	methyltransferase like 7A
211191_at	0.0360676	0.00143	-4.12	-0.988302	-1.8	CD84	CD84 molecule
221086_s_at	0.0361529	0.00144	-4.12	-0.991073	-2.6	FEZF2	FEZ family zinc finger 2
237802_at	0.0361869	0.00144	-4.12	-0.99245	-2.82	XKR4	XK related 4
239464_at	0.0362503	0.00144	-4.12	-0.994622	-2.62	KCNJ15	potassium voltage-gated channel subfamily J member 15
211903_s_at	0.0362876	0.00145	-4.12	-0.996085	-2.48	MPL	MPL proto-oncogene, thrombopoietin receptor
202124_s_at	0.0363055	0.00145	-4.11	-0.997471	-1.49	TRAK2	trafficking kinesin protein 2
242925_at	0.0363074	0.00145	-4.11	-0.997974	-2.55	RNF148	ring finger protein 148
207402_at	0.0364106	0.00145	-4.11	-1.00121	-2.05	ZNF132	zinc finger protein 132
235337_at	0.0364335	0.00145	-4.11	-1.00228	-3.16	SERTAD4	SERTA domain containing 4
1559302_at	0.0364345	0.00146	-4.11	-1.00301	-1.46	FAM234B	family with sequence similarity 234 member B
207566_at	0.0364411	0.00146	4.11	-1.00413	1.69	MR1	major histocompatibility complex, class I-related
219195_at	0.0364411	0.00146	-4.11	-1.00429	-2.42	PPARGC1A	PPARG coactivator 1 alpha
215501_s_at	0.0364415	0.00146	4.11	-1.00475	1.66	DUSP10	dual specificity phosphatase 10
219862_s_at	0.0364981	0.00146	4.11	-1.00763	1.35	NARF	nuclear prelamin A recognition factor
201563_at	0.0364981	0.00146	-4.11	-1.00809	-1.95	SORD	sorbitol dehydrogenase
237091_at	0.0364981	0.00146	-4.11	-1.00862	-1.65	TBC1D9	TBC1 domain family member 9
205044_at	0.0364981	0.00146	-4.11	-1.00874	-3.48	GABRP	gamma-aminobutyric acid type A receptor pi subunit
236741_at	0.0364981	0.00146	-4.11	-1.00896	-2.9	WDR72	WD repeat domain 72
201983_s_at	0.0365323	0.00147	4.11	-1.01033	2.83	EGFR	epidermal growth factor receptor
224499_s_at	0.0365386	0.00147	4.11	-1.01095	2.24	AICDA	activation-induced cytidine deaminase
205325_at	0.0365488	0.00147	-4.11	-1.01212	-2.5	PHYHIP	phytanoyl-CoA 2-hydroxylase interacting protein
228554_at	0.0365592	0.00147	-4.11	-1.01285	-1.86	PGR	progesterone receptor
243336_at	0.0365805	0.00147	-4.1	-1.01387	-1.43	LOC101928042///LOC101927579	uncharacterized LOC101928042///dynamin-1-like
209598_at	0.036585	0.00147	4.1	-1.01443	2.29	PNMA2	paraneoplastic Ma antigen 2
201141_at	0.0365947	0.00147	4.1	-1.01514	1.98	GPNMB	glycoprotein nmb
207944_at	0.0366882	0.00148	-4.1	-1.01809	-2.08	OCM2	oncomodulin 2
1553736_at	0.0367006	0.00148	-4.1	-1.01887	-1.7	ZFC3H1	zinc finger C3H1-type containing
233520_s_at	0.0367731	0.00148	-4.1	-1.02182	-2.06	CMYA5	cardiomyopathy associated 5
228404_at	0.0367731	0.00148	-4.1	-1.02232	-2.73	IRX2	iroquois homeobox 2
202921_s_at	0.0367731	0.00149	-4.1	-1.02259	-2.82	ANK2	ankyrin 2, neuronal
214180_at	0.0367731	0.00149	-4.1	-1.02298	-2.06	MAN1C1	mannosidase alpha class 1C member 1
208367_x_at	0.0367731	0.00149	-4.1	-1.02304	-2.81	CYP3A4	cytochrome P450 family 3 subfamily A member 4
1564400_at	0.0367869	0.00149	4.1	-1.02386	2.38	SMIM21	small integral membrane protein 21
202125_s_at	0.0368015	0.00149	-4.1	-1.02469	-1.33	TRAK2	trafficking kinesin protein 2
213738_s_at	0.0368239	0.00149	-4.1	-1.02634	-1.25	ATP5A1	ATP synthase, H+ transporting, mitochondrial F1 complex, alpha subunit 1, cardiac muscle
237619_at	0.0368239	0.00149	-4.1	-1.02639	-1.7	FAM217A	family with sequence similarity 217 member A
224724_at	0.0368239	0.00149	4.1	-1.02662	1.73	SULF2	sulfatase 2
227060_at	0.0368323	0.00149	4.1	-1.02729	2.03	RELT	RELT tumor necrosis factor receptor
206263_at	0.0368485	0.00149	-4.1	-1.02816	-1.79	FMO4	flavin containing monooxygenase 4
224790_at	0.0369987	0.0015	4.09	-1.0326	1.92	ASAP1	ArfGAP with SH3 domain, ankyrin repeat and PH domain 1
209687_at	0.0370019	0.0015	-4.09	-1.03397	-2.59	CXCL12	C-X-C motif chemokine ligand 12
235424_at	0.0370019	0.0015	-4.09	-1.0344	-1.43	FAM122A	family with sequence similarity 122A
238708_at	0.0370019	0.0015	-4.09	-1.03446	-2.16	ZNF582-AS1	ZNF582 antisense RNA 1 (head to head)
1554526_at	0.037007	0.0015	-4.09	-1.03522	-4.71	OLFM3	olfactomedin 3
218540_at	0.037007	0.0015	-4.09	-1.03548	-1.73	THTPA	thiamine triphosphatase
229652_s_at	0.0370654	0.00151	-4.09	-1.03747	-2.27	FOXN3	forkhead box N3
228344_s_at	0.0370894	0.00151	-4.09	-1.03855	-2.14	TBX3	T-box 3
221951_at	0.0371186	0.00151	-4.09	-1.03977	-1.6	TMEM80	transmembrane protein 80
235561_at	0.0371423	0.00151	-4.09	-1.04097	-1.83	TXNL1	thioredoxin like 1
231511_at	0.0371423	0.00151	-4.09	-1.04172	-2.67	FRAS1	Fraser extracellular matrix complex subunit 1
1563512_at	0.037186	0.00152	-4.09	-1.0434	-1.64	NOS1AP	nitric oxide synthase 1 adaptor protein
206119_at	0.037186	0.00152	-4.09	-1.04386	-2.35	BHMT	betaine--homocysteine S-methyltransferase
218009_s_at	0.037186	0.00152	4.09	-1.04451	2.11	PRC1	protein regulator of cytokinesis 1
227794_at	0.037186	0.00152	-4.09	-1.04464	-3.6	LOC100287413///GLYATL1	uncharacterized LOC100287413///glycine-N-acyltransferase like 1
210544_s_at	0.0372114	0.00152	-4.09	-1.04575	-1.63	ALDH3A2	aldehyde dehydrogenase 3 family member A2
221008_s_at	0.0372315	0.00152	-4.09	-1.04723	-2.81	ETNPPL	ethanolamine-phosphate phospho-lyase
223817_at	0.0372315	0.00152	-4.09	-1.04787	-1.91	LRRIQ1	leucine rich repeats and IQ motif containing 1
203087_s_at	0.0372315	0.00152	4.09	-1.04844	2.16	KIF2A	kinesin family member 2A
215193_x_at	0.0372315	0.00152	4.09	-1.04847	1.71	LOC101060835///LOC100996809///HLA-DRB4///HLA-DRB3///HLA-DRB1///HLA-DQB1	HLA class II histocompatibility antigen, DQ beta 1 chain-like///HLA class II histocompatibility antigen, DRB1-10 beta chain-like///major histocompatibility complex, class II, DR beta 4///major histocompatibility complex, class II, DR beta 3///major histocompatibility complex, class II, DR beta 1///major histocompatibility complex, class II, DQ beta 1
1558628_at	0.0372315	0.00152	-4.09	-1.04848	-1.97	RBFADN	RBFA downstream neighbor (non-protein coding)
1562510_at	0.0372346	0.00153	-4.08	-1.04899	-1.59	LINC01343	long intergenic non-protein coding RNA 1343
209351_at	0.037253	0.00153	-4.08	-1.0501	-2.3	KRT14	keratin 14
222194_at	0.037253	0.00153	-4.08	-1.05036	-2.08	FAM66D	family with sequence similarity 66 member D
204201_s_at	0.0372747	0.00153	-4.08	-1.05203	-2.53	PTPN13	protein tyrosine phosphatase, non-receptor type 13
237294_at	0.0372747	0.00153	-4.08	-1.05225	-1.66	RASSF4	Ras association domain family member 4
210644_s_at	0.0372778	0.00153	4.08	-1.05332	1.82	LAIR1	leukocyte associated immunoglobulin like receptor 1
1563560_at	0.0372778	0.00153	-4.08	-1.05404	-2.41	AHNAK	AHNAK nucleoprotein
202902_s_at	0.0372778	0.00153	4.08	-1.05404	2.41	CTSS	cathepsin S
211719_x_at	0.0372888	0.00153	4.08	-1.0548	1.64	FN1	fibronectin 1
206957_at	0.0372895	0.00154	-4.08	-1.05527	-3.44	AGXT	alanine-glyoxylate aminotransferase
230402_at	0.0372895	0.00154	-4.08	-1.0557	-2.2	DUSP15	dual specificity phosphatase 15
230499_at	0.0373786	0.00154	4.08	-1.05848	1.92	BIRC3	baculoviral IAP repeat containing 3
206554_x_at	0.0374086	0.00154	-4.08	-1.0597	-1.44	SETMAR	SET domain and mariner transposase fusion gene
224650_at	0.0374889	0.00155	-4.08	-1.06316	-3.45	MAL2	mal, T-cell differentiation protein 2 (gene/pseudogene)
204124_at	0.0374889	0.00155	4.08	-1.06318	1.78	SLC34A2	solute carrier family 34 member 2
204294_at	0.0374889	0.00155	-4.08	-1.06355	-1.97	AMT	aminomethyltransferase
206882_at	0.0374963	0.00155	-4.08	-1.06434	-2.5	SLC1A6	solute carrier family 1 member 6
244404_at	0.0374963	0.00155	-4.08	-1.06493	-1.42	STXBP4	syntaxin binding protein 4
[truncated: 43,119 more rows]
