# Supplementary material for: Prediction and analysis of novel key genes ITGAX, LAPTM5, SERPINE1 in clear cell renal cell carcinoma through bioinformatics analysis
Source: PeerJ. 2021 Apr 20;9:e11272. doi: 10.7717/peerj.11272 (PMC8063882; doi:10.7717/peerj.11272)
Supplement: Supplemental Information 7 — A total of 1,286 DEGs were screened from the GSE53000 among them 589 upregulated and 697 downregulated genes were selected. [file peerj-09-11272-s007.xlsx]

## Sheet: Sheet1
ID	adj.P.Val	P.Value	t	B	logFC	abs logFC	Gene.symbol	Gene.title
7983564	1.03e-13	2.84e-16	-11.1454	26.7513	-6.90729	6.90729	SLC12A1	solute carrier family 12 member 1
8084679	6.18e-16	1.04e-18	-12.7167	32.2445	-6.41498	6.41498	KNG1	kininogen 1
8151730	6.63e-11	3.78e-13	-9.23847	19.6859	-6.23986	6.23986	CALB1	calbindin 1
7999936	3e-16	4.77e-19	-12.9418	33.0046	-5.77856	5.77856	UMOD	uromodulin
8147145	7.43e-12	3.08e-14	-9.89223	22.1512	-5.43411	5.43411	ATP6V0D2	ATPase H+ transporting V0 subunit d2
8069795	1.03e-21	3.99e-25	-17.3627	46.5615	-4.92102	4.92102	CLDN8	claudin 8
8143221	6.14e-19	5.72e-22	-14.9721	39.5498	-4.91748	4.91748	ATP6V0A4	ATPase H+ transporting V0 subunit a4
7922627	2.48e-09	2.12e-11	-8.20592	15.7259	-4.81739	4.81739	NPHS2	NPHS2, podocin
7947156	1.9e-21	9.15e-25	-17.0781	45.7643	-4.72728	4.72728	MUC15	mucin 15, cell surface associated
8084788	2.76e-15	5.46e-18	-12.243	30.6226	-4.61619	4.61619	CLDN16	claudin 16
8126820	1.18e-15	2.24e-18	-12.4963	31.4938	-4.55761	4.55761	ADGRF1	adhesion G protein-coupled receptor F1
7952617	4.24e-18	5.22e-21	-14.2869	37.4032	-4.54949	4.54949	KCNJ1	potassium voltage-gated channel subfamily J member 1
7953936	9.26e-16	1.68e-18	-12.5794	31.7776	-4.51337	4.51337	TMEM52B	transmembrane protein 52B
8111569	9.38e-16	1.75e-18	-12.5678	31.7379	-4.4771	4.4771	RANBP3L	RAN binding protein 3 like
8045688	3.02e-07	5.02e-09	6.81787	10.3582	4.34984	4.34984	TNFAIP6	TNF alpha induced protein 6
8147273	4.25e-20	3.44e-23	-15.8699	42.2687	-4.27502	4.27502	SLC26A7	solute carrier family 26 member 7
8140984	2.08e-22	4.38e-26	-18.1355	48.6765	-4.09355	4.09355	HEPACAM2	HEPACAM family member 2
8096845	5.83e-10	4.28e-12	-8.61484	17.3017	-4.0745	4.0745	EGF	epidermal growth factor
8095663	2.33e-10	1.49e-12	-8.88495	18.3376	-4.04175	4.04175	AFM	afamin
7995868	1.66e-13	4.8e-16	-11.0029	26.2378	-4.01631	4.01631	SLC12A3	solute carrier family 12 member 3
7898314	4.44e-21	2.27e-24	-16.7704	44.8914	-4.00313	4.00313	CLCNKB	chloride voltage-gated channel Kb
7994058	7.63e-07	1.44e-08	-6.54822	9.32319	-3.97362	3.97362	SCNN1G	sodium channel epithelial 1 gamma subunit
8070467	3.76e-08	4.58e-10	-7.42634	12.7086	-3.93937	3.93937	TMPRSS2///LOC285847///FKBP5	transmembrane protease, serine 2///uncharacterized LOC285847///FK506 binding protein 5
7967993	4.55e-23	8.2e-27	-18.7372	50.275	-3.936	3.936	FGF9	fibroblast growth factor 9
7948937	8.19e-11	4.71e-13	-9.18182	19.4705	-3.88811	3.88811	SLC22A8	solute carrier family 22 member 8
8054872	8.53e-08	1.18e-09	-7.18692	11.7822	-3.85979	3.85979	TFCP2L1	transcription factor CP2-like 1
8150428	1.92e-10	1.2e-12	-8.94126	18.553	-3.82839	3.82839	SFRP1	secreted frizzled related protein 1
7901565	2.74e-07	4.5e-09	-6.84578	10.4657	-3.8274	3.8274	DIO1	deiodinase, iodothyronine type I
8122071	1.03e-21	4.02e-25	17.3603	46.5547	3.8221	3.8221	ENPP3	ectonucleotide pyrophosphatase/phosphodiesterase 3
8066757	6.19e-08	8.11e-10	-7.28144	12.1477	-3.81832	3.81832	SLC13A3	solute carrier family 13 member 3
8115287	1.6e-07	2.41e-09	-7.00422	11.0764	-3.81569	3.81569	SLC36A2	solute carrier family 36 member 2
8015991	4.01e-23	6.03e-27	-18.8495	50.5688	-3.80975	3.80975	SLC4A1	solute carrier family 4 member 1 (Diego blood group)
7991283	1.54e-23	1.85e-27	-19.2831	51.6897	-3.77587	3.77587	RHCG	Rh family C glycoprotein
7955290	1.39e-25	1.25e-29	-21.2057	56.4166	-3.74417	3.74417	AQP2	aquaporin 2
8075838	7.04e-19	6.98e-22	-14.9097	39.3569	-3.73454	3.73454	PVALB	parvalbumin
8169836	1.81e-08	2e-10	-7.63619	13.5213	-3.69693	3.69693	XPNPEP2	X-prolyl aminopeptidase 2
8025402	1.09e-21	4.6e-25	17.3138	46.4251	3.69246	3.69246	ANGPTL4	angiopoietin like 4
7927155	5.15e-22	1.55e-25	-17.6913	47.4694	-3.66395	3.66395	FXYD4	FXYD domain containing ion transport regulator 4
8084668	2.15e-18	2.39e-21	-14.5274	38.1637	-3.63513	3.63513	HRG	histidine rich glycoprotein
7976488	8.41e-16	1.46e-18	-12.6181	31.9094	-3.63448	3.63448	SERPINA5	serpin family A member 5
7916616	1.05e-05	3.08e-07	5.75737	6.33343	3.63233	3.63233	CYP2J2	cytochrome P450 family 2 subfamily J member 2
7921533	3.05e-16	4.94e-19	-12.9319	32.9711	-3.61467	3.61467	KCNJ10	potassium voltage-gated channel subfamily J member 10
7960529	4.05e-14	1.07e-16	-11.4129	27.7091	-3.61175	3.61175	SCNN1A	sodium channel epithelial 1 alpha subunit
7939314	1.81e-08	1.99e-10	-7.63733	13.5257	-3.59611	3.59611	EHF	ETS homologous factor
8058627	1.77e-11	8.25e-14	-9.63437	21.1836	-3.55615	3.55615	ERBB4	erb-b2 receptor tyrosine kinase 4
8162884	0.00771	0.000879	-3.50096	-1.3218	-3.54011	3.54011	ALDOB	aldolase, fructose-bisphosphate B
8043504	2.58e-08	2.96e-10	-7.53666	13.1358	-3.51208	3.51208	MAL	mal, T-cell differentiation protein
8113709	1.69e-11	7.68e-14	9.65295	21.2535	3.48876	3.48876	LOX	lysyl oxidase
8040249	3.57e-22	8.58e-26	-17.8978	48.0336	-3.47315	3.47315	ATP6V1C2	ATPase H+ transporting V1 subunit C2
7898300	1.97e-13	5.86e-16	-10.9488	26.0418	-3.44564	3.44564	CLCNKA	chloride voltage-gated channel Ka
7916584	2.9e-11	1.46e-13	-9.4862	20.6247	-3.39416	3.39416	TACSTD2	tumor-associated calcium signal transducer 2
7967212	0.000209	1.09e-05	-4.79836	2.86777	-3.38588	3.38588	HPD	4-hydroxyphenylpyruvate dioxygenase
8155083	2.11e-18	2.21e-21	14.5506	38.2366	3.38493	3.38493	CA9	carbonic anhydrase 9
8110347	8.06e-05	3.51e-06	-5.10956	3.96667	-3.37577	3.37577	SLC34A1	solute carrier family 34 member 1
7996563	6.45e-11	3.6e-13	-9.25114	19.734	-3.3288	3.3288	HSD11B2	hydroxysteroid 11-beta dehydrogenase 2
7947481	2.2e-18	2.51e-21	-14.5117	38.1142	-3.3202	3.3202	ELF5	E74 like ETS transcription factor 5
8092541	1.05e-09	8.05e-12	-8.45306	16.6792	-3.31748	3.31748	LIPH	lipase H
8173825	1.07e-08	1.11e-10	-7.78632	14.1027	-3.31177	3.31177	RPS6KA6	ribosomal protein S6 kinase A6
8151637	1.73e-15	3.32e-18	-12.3846	31.1105	-3.30988	3.30988	SLC7A13	solute carrier family 7 member 13
8091385	1.01e-07	1.43e-09	7.13815	11.5937	3.29004	3.29004	CP	ceruloplasmin (ferroxidase)
8123259	3.02e-05	1.09e-06	-5.42407	5.10393	-3.27516	3.27516	PLG	plasminogen
8028963	5.07e-11	2.72e-13	-9.32363	20.0092	-3.25902	3.25902	CYP2B6	cytochrome P450 family 2 subfamily B member 6
7909127	6.29e-21	3.78e-24	-16.5988	44.3996	-3.25631	3.25631	MFSD4A	major facilitator superfamily domain containing 4A
8156923	5.41e-14	1.45e-16	-11.3302	27.4143	-3.25371	3.25371	PLPPR1	phospholipid phosphatase related 1
7997962	1.35e-07	1.96e-09	-7.05679	11.2793	-3.25026	3.25026	DPEP1	dipeptidase 1 (renal)
8135915	8.88e-13	3.07e-15	10.5035	24.4175	3.24762	3.24762	HILPDA	hypoxia inducible lipid droplet associated
7915902	0.000324	1.85e-05	-4.65175	2.36048	-3.19983	3.19983	CYP4A11	cytochrome P450 family 4 subfamily A member 11
8095343	4.15e-18	4.98e-21	-14.3015	37.4494	-3.19168	3.19168	STAP1	signal transducing adaptor family member 1
8042537	4.99e-18	6.3e-21	-14.2298	37.2214	-3.1901	3.1901	ATP6V1B1	ATPase H+ transporting V1 subunit B1
8105084	0.0043	0.000427	-3.7294	-0.63978	-3.17407	3.17407	C7	complement component 7
8098671	9.29e-11	5.46e-13	-9.14392	19.3262	-3.15266	3.15266	F11	coagulation factor XI
7906079	6.52e-21	4.11e-24	-16.5704	44.3179	-3.11223	3.11223	RAB25	RAB25, member RAS oncogene family
8121784	0.0135	0.0018	3.26651	-1.99192	3.10253	3.10253	FABP7	fatty acid binding protein 7
8081288	0.000168	8.46e-06	4.86921	3.1154	3.0982	3.0982	TMEM45A	transmembrane protein 45A
8082046	3.63e-14	9.36e-17	-11.4497	27.8402	-3.08385	3.08385	CASR	calcium sensing receptor
8095628	1.59e-06	3.31e-08	-6.33531	8.51051	-3.07147	3.07147	ALB	albumin
7918936	3.66e-11	1.88e-13	-9.41972	20.3732	-3.06422	3.06422	VTCN1	V-set domain containing T cell activation inhibitor 1
7919055	1.81e-05	5.79e-07	-5.59101	5.71695	-3.05592	3.05592	HMGCS2	3-hydroxy-3-methylglutaryl-CoA synthase 2
8044067	3.57e-22	9.65e-26	-17.8564	47.9208	-3.04657	3.04657	SLC9A4	solute carrier family 9 member A4
8175234	1.83e-07	2.83e-09	-6.96418	10.922	-3.02438	3.02438	GPC3	glypican 3
8005879	8.44e-16	1.5e-18	-12.6121	31.8888	-3.01992	3.01992	SLC13A2	solute carrier family 13 member 2
8149097	3.21e-08	3.78e-10	-7.47481	12.8963	-2.97173	2.97173	DEFB1	defensin beta 1
8122176	3.85e-08	4.69e-10	-7.42017	12.6847	-2.96359	2.96359	TCF21	transcription factor 21
8067140	0.00149	0.000116	-4.12342	0.59746	-2.95796	2.95796	CYP24A1	cytochrome P450 family 24 subfamily A member 1
8077270	1.29e-07	1.87e-09	-7.06876	11.3256	-2.93338	2.93338	CHL1	cell adhesion molecule L1 like
8169115	2.61e-18	3.06e-21	-14.4511	37.9231	-2.93317	2.93317	NRK	Nik related kinase
7978544	2.11e-26	9.58e-31	22.2477	58.8225	2.92953	2.92953	EGLN3	egl-9 family hypoxia inducible factor 3
8092735	4.72e-21	2.55e-24	-16.7304	44.7771	-2.91046	2.91046	TMEM207	transmembrane protein 207
7954208	1.65e-09	1.36e-11	-8.32008	16.1666	-2.90314	2.90314	PIK3C2G	phosphatidylinositol-4-phosphate 3-kinase catalytic subunit type 2 gamma
7936050	3.39e-06	7.91e-08	-6.11086	7.65934	-2.86409	2.86409	CYP17A1	cytochrome P450 family 17 subfamily A member 1
7926105	6.41e-15	1.39e-17	-11.9805	29.7112	-2.83892	2.83892	GATA3	GATA binding protein 3
8094988	4.19e-20	3.27e-23	-15.8864	42.3177	-2.83562	2.83562	CWH43	cell wall biogenesis 43 C-terminal homolog
8013364	3.51e-11	1.79e-13	-9.43252	20.4217	-2.82729	2.82729	SLC47A2	solute carrier family 47 member 2
8128459	1.03e-05	2.99e-07	-5.76491	6.36151	-2.82727	2.82727	SIM1	single-minded family bHLH transcription factor 1
7929816	9.38e-12	3.94e-14	9.82733	21.9083	2.81537	2.81537	SCD	stearoyl-CoA desaturase
7964927	0.000147	7.2e-06	-4.91355	3.27115	-2.8148	2.8148	TSPAN8	tetraspanin 8
7924309	7.06e-09	6.92e-11	-7.90583	14.5654	-2.80878	2.80878	ESRRG	estrogen related receptor gamma
8082673	2.29e-12	8.58e-15	-10.2297	23.4073	-2.8086	2.8086	ACPP	acid phosphatase, prostate
7988990	0.00604	0.000646	-3.59933	-1.03151	-2.8034	2.8034	WDR72	WD repeat domain 72
8147351	1.62e-14	4.09e-17	-11.679	28.653	-2.7982	2.7982	ESRP1///RAF1	epithelial splicing regulatory protein 1///Raf-1 proto-oncogene, serine/threonine kinase
8106418	2e-05	6.58e-07	-5.55727	5.59258	-2.78337	2.78337	CRHBP	corticotropin releasing hormone binding protein
8110821	0.000242	1.31e-05	4.7488	2.69548	2.78273	2.78273	SLC6A3	solute carrier family 6 member 3
8068684	3.19e-20	2.3e-23	-16.0017	42.6589	-2.78119	2.78119	FAM3B	family with sequence similarity 3 member B
7965884	0.0109	0.00136	-3.36018	-1.72798	-2.77937	2.77937	PAH	phenylalanine hydroxylase
7981514	1.49e-06	3.09e-08	6.35345	8.57956	2.76335	2.76335	AHNAK2	AHNAK nucleoprotein 2
8046020	3.46e-13	1.09e-15	-10.7811	25.433	-2.76086	2.76086	SCN2A	sodium voltage-gated channel alpha subunit 2
8120335	1.81e-07	2.79e-09	-6.96769	10.9355	-2.75311	2.75311	FAM83B	family with sequence similarity 83 member B
8007429	0.00307	0.000281	-3.85843	-0.24274	-2.72507	2.72507	G6PC	glucose-6-phosphatase catalytic subunit
7949679	1.91e-20	1.32e-23	-16.1836	43.1942	-2.6808	2.6808	SPTBN2	spectrin beta, non-erythrocytic 2
8110688	3.31e-10	2.2e-12	-8.78449	17.9529	-2.67273	2.67273	SLC9A3	solute carrier family 9 member A3
7964388	2.11e-26	1.27e-30	22.1313	58.5587	2.67084	2.67084	NDUFA4L2	NDUFA4, mitochondrial complex associated like 2
8119782	9.07e-09	9.23e-11	-7.83262	14.282	-2.6577	2.6577	SLC22A7	solute carrier family 22 member 7
7994074	2.84e-08	3.29e-10	-7.51049	13.0344	-2.65306	2.65306	SCNN1B	sodium channel epithelial 1 beta subunit
7958425	1.86e-06	3.96e-08	-6.28954	8.33642	-2.65279	2.65279	DAO	D-amino acid oxidase
7941074	5.81e-05	2.37e-06	-5.21524	4.34602	-2.65182	2.65182	SLC22A12	solute carrier family 22 member 12
8115851	3.21e-08	3.77e-10	7.47534	12.8983	2.62319	2.62319	STC2	stanniocalcin 2
8103894	8.29e-18	1.1e-20	-14.0614	36.6827	-2.59655	2.59655	ENPP6	ectonucleotide pyrophosphatase/phosphodiesterase 6
8160168	5.86e-10	4.31e-12	-8.6127	17.2935	-2.59525	2.59525	FREM1	FRAS1 related extracellular matrix 1
8125149	3.29e-05	1.21e-06	-5.39633	5.00267	-2.59121	2.59121	SLC44A4	solute carrier family 44 member 4
8178653	3.29e-05	1.21e-06	-5.39633	5.00267	-2.59121	2.59121	SLC44A4	solute carrier family 44 member 4
8179861	3.29e-05	1.21e-06	-5.39633	5.00267	-2.59121	2.59121	SLC44A4	solute carrier family 44 member 4
8008321	4.99e-07	8.84e-09	-6.67376	9.80436	-2.5899	2.5899	ACSF2	acyl-CoA synthetase family member 2
7954899	7.11e-06	1.93e-07	-5.87954	6.78939	-2.58077	2.58077	CNTN1	contactin 1
7916506	4.94e-12	1.99e-14	-10.0075	22.5816	-2.5719	2.5719	C1orf168	chromosome 1 open reading frame 168
8120194	5.13e-19	4.62e-22	-15.039	39.7562	-2.56034	2.56034	TFAP2B	transcription factor AP-2 beta
7943998	4.94e-13	1.63e-15	10.6726	25.0372	2.55913	2.55913	NNMT	nicotinamide N-methyltransferase
7977933	2.99e-07	4.95e-09	-6.82162	10.3727	-2.55768	2.55768	SLC7A8	solute carrier family 7 member 8
7948920	0.000222	1.18e-05	-4.77824	2.79773	-2.55224	2.55224	SLC22A6	solute carrier family 22 member 6
8131719	0.00276	0.000247	3.89722	-0.12177	2.55192	2.55192	DNAH11	dynein axonemal heavy chain 11
8001197	4.46e-09	4.07e-11	8.04034	15.0859	2.55117	2.55117	NETO2	neuropilin and tolloid like 2
7961524	1.08e-12	3.78e-15	-10.4476	24.2119	-2.54556	2.54556	ERP27	endoplasmic reticulum protein 27
8149071	9.41e-09	9.64e-11	7.82162	14.2394	2.51846	2.51846	ANGPT2	angiopoietin 2
8053654	4.63e-05	1.79e-06	-5.29057	4.61822	-2.51472	2.51472	PRDM10///FABP1	PR/SET domain 10///fatty acid binding protein 1
7904396	0.00241	0.00021	-3.94652	0.03297	-2.50723	2.50723	HAO2	hydroxyacid oxidase 2
7965410	0.0178	0.00257	-3.14604	-2.32369	-2.50357	2.50357	DCN	decorin
8101893	6.94e-07	1.3e-08	-6.57508	9.42603	-2.49473	2.49473	ADH1C	alcohol dehydrogenase 1C (class I), gamma polypeptide
7918379	6.78e-12	2.79e-14	-9.91848	22.2494	-2.49173	2.49173	GSTM3	glutathione S-transferase mu 3
8112045	4.26e-08	5.29e-10	7.38973	12.5668	2.4916	2.4916	ESM1	endothelial cell specific molecule 1
8104268	0.0221	0.00338	-3.05181	-2.57698	-2.48298	2.48298	SLC6A19	solute carrier family 6 member 19
8126784	2.72e-05	9.52e-07	5.45953	5.23364	2.4756	2.4756	PLA2G7	phospholipase A2 group VII
8096511	1.07e-13	3e-16	-11.1312	26.7003	-2.47494	2.47494	BMPR1B	bone morphogenetic protein receptor type 1B
8033257	1.15e-10	6.82e-13	9.08612	19.106	2.47399	2.47399	C3	complement component 3
8063590	0.00266	0.000236	-3.91088	-0.07901	-2.47228	2.47228	PCK1	phosphoenolpyruvate carboxykinase 1
7916412	3.62e-09	3.25e-11	-8.09795	15.3086	-2.47069	2.47069	FAM151A	family with sequence similarity 151 member A
8131550	3.05e-07	5.09e-09	-6.81431	10.3446	-2.46901	2.46901	SCIN	scinderin
7947274	2.76e-11	1.37e-13	-9.50206	20.6846	-2.46301	2.46301	MPPED2	metallophosphoesterase domain containing 2
7960464	8.89e-08	1.23e-09	7.17546	11.7378	2.46076	2.46076	VWF	von Willebrand factor
7933537	8.14e-06	2.27e-07	-5.83737	6.63172	-2.45677	2.45677	OGDHL	oxoglutarate dehydrogenase-like
8096116	1.1e-06	2.17e-08	-6.44365	8.92346	-2.45623	2.45623	GPAT3	glycerol-3-phosphate acyltransferase 3
7967544	9.29e-11	5.47e-13	9.14336	19.3241	2.4504	2.4504	SCARB1	scavenger receptor class B member 1
8094870	3.69e-06	8.83e-08	-6.08248	7.55219	-2.43134	2.43134	SHISA3	shisa family member 3
7957850	1.91e-09	1.59e-11	8.27946	16.0098	2.42306	2.42306	GAS2L3	growth arrest specific 2 like 3
7972428	1.35e-21	6.09e-25	-17.2172	46.1553	-2.41577	2.41577	OXGR1	oxoglutarate receptor 1
8100109	8.15e-10	6.07e-12	-8.52523	16.9571	-2.39582	2.39582	GABRA2	gamma-aminobutyric acid type A receptor alpha2 subunit
7995222	1.07e-09	8.28e-12	-8.44605	16.6522	-2.38788	2.38788	SLC5A2	solute carrier family 5 member 2
8001394	9.95e-07	1.94e-08	-6.47311	9.03597	-2.38601	2.38601	TOX3	TOX high mobility group box family member 3
7945169	0.00472	0.00048	-3.69261	-0.75147	-2.38422	2.38422	TMEM45B	transmembrane protein 45B
7980096	1.56e-06	3.24e-08	-6.34101	8.53218	-2.37346	2.37346	ALDH6A1	aldehyde dehydrogenase 6 family member A1
8138363	3.34e-09	2.96e-11	-8.12155	15.3999	-2.36915	2.36915	SOSTDC1	sclerostin domain containing 1
8042942	5.13e-08	6.54e-10	7.33599	12.3588	2.36348	2.36348	HK2	hexokinase 2
8035083	2.83e-06	6.4e-08	-6.16565	7.86653	-2.35907	2.35907	CYP4F2	cytochrome P450 family 4 subfamily F member 2
8147697	6.2e-18	8.01e-21	-14.1566	36.9876	-2.35779	2.35779	GRHL2	grainyhead like transcription factor 2
8113358	5.45e-11	2.96e-13	9.30186	19.9266	2.35723	2.35723	ST8SIA4	ST8 alpha-N-acetyl-neuraminide alpha-2,8-sialyltransferase 4
8044080	1.6e-20	1.06e-23	-16.2573	43.4098	-2.35154	2.35154	SLC9A2	solute carrier family 9 member A2
7953532	5.2e-10	3.78e-12	8.6462	17.4222	2.34873	2.34873	ENO2	enolase 2
8098439	0.00341	0.000321	-3.81694	-0.37132	-2.34275	2.34275	EPCAM	epithelial cell adhesion molecule
8101126	7.66e-05	3.3e-06	5.12601	4.02553	2.3423	2.3423	CXCL10	C-X-C motif chemokine ligand 10
8057486	3.45e-06	8.1e-08	-6.10484	7.6366	-2.33743	2.33743	PDE1A	phosphodiesterase 1A
7923929	0.0291	0.00482	-2.92707	-2.90356	-2.33691	2.33691	PIGR	polymeric immunoglobulin receptor
8068651	2.73e-11	1.33e-13	-9.50985	20.714	-2.33677	2.33677	PCP4	Purkinje cell protein 4
8045848	4.65e-15	9.78e-18	-12.0785	30.0526	-2.33283	2.33283	UPP2	uridine phosphorylase 2
8082012	1.44e-13	4.11e-16	-11.0452	26.3905	-2.33115	2.33115	SLC15A2	solute carrier family 15 member 2
8056327	2.43e-11	1.16e-13	-9.54559	20.8489	-2.32786	2.32786	GRB14	growth factor receptor bound protein 14
8158771	5.57e-05	2.25e-06	-5.22931	4.39678	-2.32725	2.32725	AIF1L	allograft inflammatory factor 1 like
7907572	0.00598	0.000638	-3.6034	-1.01938	-2.30897	2.30897	PAPPA2	pappalysin 2
8056184	0.000152	7.49e-06	-4.90278	3.23325	-2.30735	2.30735	ITGB6///ITGB6	integrin subunit beta 6///integrin subunit beta 6
7991602	5.28e-08	6.77e-10	7.32696	12.3239	2.3027	2.3027	PCSK6	proprotein convertase subtilisin/kexin type 6
8101881	0.00615	0.000662	-3.59155	-1.05466	-2.29399	2.29399	ADH1B	alcohol dehydrogenase 1B (class I), beta polypeptide
8107764	3.07e-06	7.07e-08	-6.13991	7.76912	-2.2924	2.2924	CTXN3	cortexin 3
7975076	4.06e-11	2.11e-13	-9.39	20.2607	-2.27448	2.27448	HSPA2	heat shock protein family A (Hsp70) member 2
7923164	5.52e-21	3.15e-24	-16.6602	44.5761	-2.27433	2.27433	ATP6V1G3	ATPase H+ transporting V1 subunit G3
7995829	8.8e-09	8.83e-11	-7.84374	14.325	-2.26967	2.26967	MT1H	metallothionein 1H
8129666	9.17e-18	1.27e-20	-14.0174	36.5414	-2.26951	2.26951	SLC2A12	solute carrier family 2 member 12
8090044	4.47e-10	3.11e-12	8.69611	17.6139	2.26649	2.26649	SEMA5B	semaphorin 5B
7979524	8.8e-13	3.01e-15	-10.5083	24.4351	-2.26228	2.26228	TMEM30B	transmembrane protein 30B
8101862	0.0022	0.000187	-3.98133	0.14293	-2.26111	2.26111	ADH6	alcohol dehydrogenase 6 (class V)
8114970	0.000559	3.6e-05	4.46352	1.72006	2.25985	2.25985	C5orf46	chromosome 5 open reading frame 46
8029536	9.68e-06	2.79e-07	5.78339	6.43034	2.25689	2.25689	APOC1	apolipoprotein C1
8095535	5.14e-05	2.05e-06	-5.2552	4.49023	-2.2528	2.2528	ENAM	enamelin
8114805	1.08e-07	1.53e-09	-7.11995	11.5233	-2.25169	2.25169	FGF1	fibroblast growth factor 1
8157487	4.05e-08	4.97e-10	-7.40555	12.6281	-2.243	2.243	PAPPA	pappalysin 1
8135436	2.36e-13	7.09e-16	-10.8974	25.8556	-2.23469	2.23469	SLC26A4	solute carrier family 26 member 4
8175871	2.15e-10	1.35e-12	-8.91055	18.4356	-2.23276	2.23276	L1CAM	L1 cell adhesion molecule
8102938	3.34e-12	1.28e-14	-10.123	23.0117	-2.23209	2.23209	RNF150	ring finger protein 150
8099476	0.0457	0.00869	-2.71249	-3.4412	-2.2296	2.2296	PROM1	prominin 1
7955613	1.32e-07	1.92e-09	-7.06192	11.2991	-2.22554	2.22554	KRT7	keratin 7
8112649	6.5e-11	3.65e-13	-9.24774	19.7211	-2.21318	2.21318	FAM169A	family with sequence similarity 169 member A
8041853	0.00232	0.0002	-3.9612	0.07929	-2.21117	2.21117	EPCAM	epithelial cell adhesion molecule
8007363	2.84e-11	1.41e-13	-9.49397	20.654	-2.20983	2.20983	WNK4	WNK lysine deficient protein kinase 4
8064613	9.81e-14	2.68e-16	-11.1613	26.8088	-2.20963	2.20963	SLC4A11	solute carrier family 4 member 11
7944164	2.96e-08	3.44e-10	-7.49878	12.9891	-2.20665	2.20665	TMPRSS4	transmembrane protease, serine 4
8079433	5.77e-09	5.41e-11	-7.96814	14.8065	-2.19813	2.19813	PTH1R	parathyroid hormone 1 receptor
7938951	1.02e-09	7.83e-12	-8.46008	16.7062	-2.19283	2.19283	ANO5	anoctamin 5
8041570	1.72e-17	2.48e-20	-13.8153	35.8886	-2.19096	2.19096	TMEM178A	transmembrane protein 178A
8083422	0.000517	3.27e-05	-4.49056	1.81127	-2.18923	2.18923	SUCNR1	succinate receptor 1
8001898	0.000129	6.12e-06	-4.95791	3.4276	-2.18674	2.18674	CDH16	cadherin 16
7908388	9.88e-08	1.38e-09	7.14553	11.6222	2.17754	2.17754	RGS1	regulator of G-protein signaling 1
8059580	8.51e-08	1.17e-09	-7.18874	11.7892	-2.17279	2.17279	DNER	delta/notch like EGF repeat containing
8147065	1.34e-18	1.37e-21	-14.6989	38.7013	-2.16904	2.16904	RALYL	RALY RNA binding protein-like
8149774	2.24e-06	4.89e-08	6.23532	8.13054	2.16802	2.16802	LOXL2	lysyl oxidase like 2
8128991	3.4e-09	3.03e-11	8.11579	15.3776	2.16521	2.16521	LAMA4	laminin subunit alpha 4
7968062	3.33e-20	2.5e-23	-15.9748	42.5795	-2.16203	2.16203	ATP12A	ATPase H+/K+ transporting non-gastric alpha2 subunit
8103326	0.241	0.0859	1.74608	-5.43764	2.16188	2.16188	FGG	fibrinogen gamma chain
8156043	0.00055	3.52e-05	-4.46984	1.74138	-2.16149	2.16149	PSAT1	phosphoserine aminotransferase 1
8146092	0.000201	1.04e-05	4.81112	2.91222	2.15933	2.15933	IDO1	indoleamine 2,3-dioxygenase 1
7901883	0.0877	0.0207	-2.37597	-4.21878	-2.15057	2.15057	ANGPTL3	angiopoietin like 3
7909568	6.91e-08	9.13e-10	7.25119	12.0307	2.14266	2.14266	DTL	denticleless E3 ubiquitin protein ligase homolog
7968678	0.0109	0.00136	-3.35836	-1.73316	-2.14248	2.14248	FREM2	FRAS1 related extracellular matrix protein 2
7921873	2.16e-07	3.45e-09	6.91343	10.7263	2.1344	2.1344	FCGR3B///FCGR3A	Fc fragment of IgG receptor IIIb///Fc fragment of IgG receptor IIIa
8106176	0.00239	0.000207	-3.95029	0.04486	-2.12892	2.12892	TMEM174	transmembrane protein 174
8123864	1.24e-06	2.51e-08	-6.40695	8.78344	-2.11703	2.11703	TFAP2A	transcription factor AP-2 alpha
8133876	0.000143	6.97e-06	4.92257	3.30292	2.11689	2.11689	CD36	CD36 molecule
8126729	5.54e-06	1.43e-07	-5.95666	7.0785	-2.11512	2.11512	CLIC5	chloride intracellular channel 5
7983239	7.02e-15	1.58e-17	-11.9438	29.5831	-2.10735	2.10735	CKMT1A///CKMT1B///CKMT1A///CKMT1B	creatine kinase, mitochondrial 1A///creatine kinase, mitochondrial 1B///creatine kinase, mitochondrial 1A///creatine kinase, mitochondrial 1B
7983256	7.02e-15	1.58e-17	-11.9438	29.5831	-2.10735	2.10735	CKMT1A///CKMT1B///CKMT1A///CKMT1B	creatine kinase, mitochondrial 1A///creatine kinase, mitochondrial 1B///creatine kinase, mitochondrial 1A///creatine kinase, mitochondrial 1B
8006594	0.0131	0.00173	3.27956	-1.95546	2.10709	2.10709	CCL18	C-C motif chemokine ligand 18
8102610	7.48e-05	3.21e-06	5.13407	4.05439	2.10483	2.10483	QRFPR	pyroglutamylated RFamide peptide receptor
8001531	7.14e-06	1.94e-07	-5.87809	6.78398	-2.1014	2.1014	MT1G	metallothionein 1G
8042788	0.000354	2.06e-05	4.62176	2.25759	2.1007	2.1007	ACTG2	actin, gamma 2, smooth muscle, enteric
8047248	1.21e-08	1.27e-10	-7.75125	13.9669	-2.09888	2.09888	PLCL1	phospholipase C like 1
7943413	2.04e-07	3.24e-09	6.92939	10.7878	2.09758	2.09758	BIRC3	baculoviral IAP repeat containing 3
8050619	0.0932	0.0225	2.34284	-4.29078	2.09537	2.09537	APOB	apolipoprotein B
8117034	4.15e-10	2.84e-12	-8.71937	17.7031	-2.09174	2.09174	GMPR	guanosine monophosphate reductase
8059776	0.000542	3.45e-05	-4.47506	1.75898	-2.08941	2.08941	KCNJ13	potassium voltage-gated channel subfamily J member 13
8088866	1.75e-08	1.92e-10	-7.6472	13.5639	-2.08693	2.08693	CNTN3	contactin 3
8139488	8.19e-11	4.72e-13	9.18127	19.4684	2.08004	2.08004	IGFBP3	insulin like growth factor binding protein 3
8047763	1.8e-05	5.77e-07	5.59226	5.72155	2.07997	2.07997	NRP2	neuropilin 2
7982889	4.25e-10	2.93e-12	8.71201	17.6749	2.07945	2.07945	NUSAP1	nucleolar and spindle associated protein 1
7940147	3.31e-08	3.92e-10	7.46586	12.8616	2.07385	2.07385	FAM111B	family with sequence similarity 111 member B
7983910	0.0282	0.00462	2.94237	-2.86406	2.0732	2.0732	AQP9	aquaporin 9
7918622	1.6e-09	1.3e-11	8.33026	16.2058	2.07233	2.07233	SLC16A1	solute carrier family 16 member 1
7980098	2.92e-06	6.68e-08	-6.15461	7.82472	-2.06714	2.06714	ALDH6A1	aldehyde dehydrogenase 6 family member A1
8056151	8.96e-07	1.73e-08	-6.50274	9.14918	-2.06337	2.06337	PLA2R1	phospholipase A2 receptor 1
8126954	0.029	0.0048	-2.9285	-2.89989	-2.0625	2.0625	PKHD1	polycystic kidney and hepatic disease 1 (autosomal recessive)
8074070	0.000726	4.9e-05	-4.37467	1.42234	-2.06202	2.06202	MIOX	myo-inositol oxygenase
7976816	0.000141	6.87e-06	-4.92654	3.31692	-2.06054	2.06054	SNORD114-3	small nucleolar RNA, C/D box 114-3
8122744	5.25e-07	9.4e-09	-6.65793	9.74361	-2.0525	2.0525	IYD	iodotyrosine deiodinase
8078759	7.38e-08	9.85e-10	-7.23206	11.9567	-2.05111	2.05111	SLC22A13	solute carrier family 22 member 13
8112971	0.000108	4.97e-06	5.0151	3.63012	2.05046	2.05046	HAPLN1	hyaluronan and proteoglycan link protein 1
8111490	6.09e-05	2.51e-06	-5.19985	4.29061	-2.04778	2.04778	PRLR	prolactin receptor
8068583	0.0105	0.0013	-3.37304	-1.69135	-2.04447	2.04447	KCNJ15	potassium voltage-gated channel subfamily J member 15
8111271	0.00013	6.17e-06	-4.95565	3.41961	-2.0385	2.0385	CDH9	cadherin 9
7932765	1.51e-10	9.24e-13	-9.00803	18.8081	-2.02804	2.02804	MPP7	membrane palmitoylated protein 7
7993126	2.24e-07	3.59e-09	-6.9031	10.6865	-2.02702	2.02702	ABAT	4-aminobutyrate aminotransferase
8043522	5.9e-16	9.74e-19	-12.7355	32.3082	-2.02498	2.02498	PROM2	prominin 2
8112202	1.6e-09	1.29e-11	8.33264	16.215	2.02431	2.02431	PLK2	polo like kinase 2
8142628	0.139	0.0387	-2.114	-4.76482	-2.02376	2.02376	SLC13A1	solute carrier family 13 member 1
8117304	0.0515	0.0102	2.65175	-3.58759	2.02264	2.02264	SLC17A4	solute carrier family 17 member 4
8034084	1.72e-17	2.47e-20	-13.816	35.8912	-2.02077	2.02077	AP1M2	adaptor related protein complex 1 mu 2 subunit
8014974	3.05e-07	5.1e-09	6.81422	10.3442	2.02069	2.02069	TOP2A	topoisomerase (DNA) II alpha
7926786	9.05e-10	6.8e-12	8.49637	16.846	2.01722	2.01722	APBB1IP	amyloid beta precursor protein binding family B member 1 interacting protein
7927179	8.32e-06	2.33e-07	-5.82993	6.60393	-2.01458	2.01458	TMEM72	transmembrane protein 72
7913385	0.000106	4.83e-06	-5.02288	3.65774	-2.01371	2.01371	RAP1GAP	RAP1 GTPase activating protein
8021058	3.25e-09	2.86e-11	-8.13019	15.4332	-2.00635	2.00635	SLC14A2	solute carrier family 14 member 2
8011671	8.41e-18	1.14e-20	-14.0503	36.6471	-2.00375	2.00375	GGT6	gamma-glutamyltransferase 6
8162254	3.47e-05	1.29e-06	5.37941	4.94098	2.00326	2.00326	DIRAS2	DIRAS family GTPase 2
7930980	3.89e-13	1.24e-15	-10.7468	25.3081	-2.00272	2.00272	PLPP4	phospholipid phosphatase 4
8158431	1.04e-08	1.08e-10	-7.79298	14.1285	-1.99856	1.99856	PHYHD1	phytanoyl-CoA dioxygenase domain containing 1
7961891	3.96e-10	2.7e-12	8.7326	17.7539	1.99701	1.99701	BHLHE41	basic helix-loop-helix family member e41
7906163	4.54e-19	3.95e-22	-15.0883	39.9076	-1.99695	1.99695	RHBG	Rh family B glycoprotein (gene/pseudogene)
7912145	0.00511	0.000526	3.66377	-0.83853	1.9915	1.9915	TNFRSF9	TNF receptor superfamily member 9
7928308	4.78e-10	3.39e-12	8.67433	17.5302	1.99029	1.99029	DDIT4	DNA damage inducible transcript 4
8160040	0.000285	1.58e-05	-4.69547	2.51099	-1.98598	1.98598	PTPRD	protein tyrosine phosphatase, receptor type D
8101118	0.00564	0.000594	3.62567	-0.9529	1.98333	1.98333	CXCL9	C-X-C motif chemokine ligand 9
8046408	2.65e-15	5.18e-18	12.2579	30.6741	1.98114	1.98114	PDK1	pyruvate dehydrogenase kinase 1
8099368	1.9e-13	5.59e-16	-10.9615	26.0879	-1.97755	1.97755	CLNK	cytokine dependent hematopoietic cell linker
7979400	5.24e-11	2.83e-13	-9.31356	19.971	-1.97228	1.97228	C14orf37	chromosome 14 open reading frame 37
8046238	2.77e-14	7.07e-17	-11.5272	28.1158	-1.96985	1.96985	MYO3B	myosin IIIB
7921868	9.82e-07	1.91e-08	6.47737	9.05223	1.96032	1.96032	FCGR3A	Fc fragment of IgG receptor IIIa
8017885	0.000227	1.2e-05	-4.77198	2.77596	-1.95431	1.95431	ABCA8	ATP binding cassette subfamily A member 8
8006005	0.00364	0.000346	-3.79369	-0.44297	-1.95186	1.95186	PIPOX	pipecolic acid and sarcosine oxidase
7963826	0.000451	2.77e-05	-4.53746	1.9701	-1.9498	1.9498	PPP1R1A	protein phosphatase 1 regulatory inhibitor subunit 1A
8132318	3.68e-06	8.78e-08	6.08407	7.55817	1.94525	1.94525	ANLN	anillin actin binding protein
8111512	0.00939	0.00113	-3.42096	-1.55399	-1.93801	1.93801	UGT3A1	UDP glycosyltransferase family 3 member A1
8162502	0.000107	4.89e-06	-5.01948	3.64565	-1.93682	1.93682	FBP1	fructose-bisphosphatase 1
8108483	7.38e-16	1.26e-18	-12.6606	32.0539	-1.93651	1.93651	SLC4A9	solute carrier family 4 member 9
8150978	8.1e-15	1.87e-17	-11.8964	29.4172	-1.93329	1.93329	CA8	carbonic anhydrase 8
7919314	0.000406	2.44e-05	-4.57314	2.09149	-1.93048	1.93048	FMO5	flavin containing monooxygenase 5
7917304	5.9e-06	1.55e-07	-5.93639	7.00244	-1.92615	1.92615	MCOLN3	mucolipin 3
8129573	0.00149	0.000116	-4.12436	0.6005	-1.92424	1.92424	MOXD1	monooxygenase DBH like 1
8123303	6.55e-15	1.44e-17	-11.9708	29.6772	-1.92384	1.92384	PACRG	PARK2 coregulated
7938925	1.89e-06	4.03e-08	-6.28498	8.31908	-1.91851	1.91851	NELL1	neural EGFL like 1
8075401	2.33e-08	2.65e-10	7.56471	13.2444	1.91664	1.91664	GAL3ST1	galactose-3-O-sulfotransferase 1
7937020	4.45e-07	7.76e-09	6.70684	9.93136	1.91393	1.91393	MKI67	marker of proliferation Ki-67
7983867	3.7e-06	8.87e-08	-6.08125	7.54751	-1.91309	1.91309	CGNL1	cingulin like 1
7899029	7.48e-09	7.42e-11	-7.8881	14.4968	-1.91219	1.91219	MAN1C1	mannosidase alpha class 1C member 1
8102587	0.153	0.0443	-2.05391	-4.88237	-1.91042	1.91042	NDNF	neuron derived neurotrophic factor
7930714	7.85e-05	3.41e-06	-5.11762	3.99548	-1.91009	1.91009	ATRNL1	attractin like 1
7956658	4.34e-08	5.42e-10	-7.38339	12.5423	-1.9092	1.9092	SLC16A7	solute carrier family 16 member 7
8160297	1.03e-11	4.42e-14	9.79735	21.796	1.90695	1.90695	PLIN2	perilipin 2
7917798	2e-09	1.68e-11	-8.26613	15.9583	-1.90667	1.90667	ABCA4	ATP binding cassette subfamily A member 4
8139640	0.00546	0.000571	-3.63818	-0.91544	-1.90599	1.90599	DDC	dopa decarboxylase
8130768	6.24e-09	5.96e-11	7.94369	14.712	1.9042	1.9042	RNASET2	ribonuclease T2
7961580	3.88e-05	1.47e-06	-5.34463	4.81441	-1.90419	1.90419	LMO3	LIM domain only 3
8119898	6.29e-13	2.11e-15	10.603	24.7826	1.89893	1.89893	VEGFA	vascular endothelial growth factor A
8055465	2.49e-09	2.14e-11	8.20366	15.7172	1.89597	1.89597	CXCR4	C-X-C motif chemokine receptor 4
8112803	5.89e-07	1.08e-08	6.62323	9.61053	1.89524	1.89524	LHFPL2	lipoma HMGIC fusion partner-like 2
7980233	0.0035	0.000331	3.8075	-0.40046	1.89262	1.89262	PGF	placental growth factor
7922598	6.3e-05	2.62e-06	-5.18835	4.24922	-1.89149	1.89149	ANGPTL1	angiopoietin like 1
8095986	0.0147	0.00199	-3.23198	-2.08791	-1.89146	1.89146	ANXA3	annexin A3
8099633	0.00323	0.0003	-3.83824	-0.30541	-1.89099	1.89099	PPARGC1A	PPARG coactivator 1 alpha
8105908	0.00287	0.000258	-3.88359	-0.16436	-1.88986	1.88986	OCLN///LOC647859	occludin///occludin pseudogene
8141374	0.015	0.00205	-3.22281	-2.11328	-1.88125	1.88125	AZGP1	alpha-2-glycoprotein 1, zinc-binding
8122150	5.06e-07	9e-09	-6.6691	9.78647	-1.88075	1.88075	EYA4	EYA transcriptional coactivator and phosphatase 4
8016476	2.3e-09	1.95e-11	-8.22786	15.8106	-1.87818	1.87818	HOXB9	homeobox B9
7971077	0.00318	0.000295	3.84349	-0.28912	1.87668	1.87668	POSTN	periostin
8135594	7.62e-13	2.58e-15	10.5492	24.5855	1.87448	1.87448	CAV1	caveolin 1
8132465	1.49e-08	1.61e-10	-7.69215	13.738	-1.86929	1.86929	HECW1	HECT, C2 and WW domain containing E3 ubiquitin protein ligase 1
8170179	1.35e-10	8.12e-13	-9.04139	18.9354	-1.86083	1.86083	VGLL1	vestigial like family member 1
7980908	0.000323	1.84e-05	-4.65327	2.3657	-1.85715	1.85715	FBLN5	fibulin 5
8160504	0.031	0.00524	-2.89768	-2.97904	-1.84734	1.84734	LRRC19	leucine rich repeat containing 19
7989647	4.46e-07	7.79e-09	6.70602	9.92821	1.84523	1.84523	KIAA0101	KIAA0101
8145418	3.35e-08	4e-10	7.46089	12.8423	1.84193	1.84193	CDCA2	cell division cycle associated 2
7925876	1.86e-16	2.79e-19	13.0981	33.5283	1.83979	1.83979	PFKP	phosphofructokinase, platelet
8095043	1.68e-10	1.03e-12	-8.97892	18.6969	-1.83917	1.83917	RASL11B///RASL11B	RAS like family 11 member B///RAS like family 11 member B
8149448	6.87e-06	1.85e-07	5.89053	6.83055	1.83887	1.83887	MSR1	macrophage scavenger receptor 1
7921637	2.06e-06	4.44e-08	6.26001	8.22424	1.8382	1.8382	CD84	CD84 molecule
8049187	1.47e-08	1.57e-10	-7.69792	13.7604	-1.83489	1.83489	EFHD1	EF-hand domain family member D1
7954398	0.0116	0.00148	-3.33197	-1.80801	-1.83379	1.83379	SPX	spexin hormone
8109912	1.77e-11	8.25e-14	-9.63414	21.1827	-1.82968	1.82968	KCNIP1	potassium voltage-gated channel interacting protein 1
7926728	6.9e-07	1.29e-08	6.57687	9.43288	1.82937	1.82937	MYO3A	myosin IIIA
8132055	2.92e-12	1.12e-14	-10.1602	23.1498	-1.8274	1.8274	MTURN	maturin, neural progenitor differentiation regulator homolog (Xenopus)
7969288	0.212	0.0709	-1.83871	-5.27896	-1.82398	1.82398	OLFM4	olfactomedin 4
8105331	0.0422	0.00783	2.75134	-3.34617	1.82367	1.82367	GZMK	granzyme K
8175195	1.27e-14	3.17e-17	-11.7496	28.9019	-1.82142	1.82142	HS6ST2	heparan sulfate 6-O-sulfotransferase 2
7965681	1.33e-12	4.76e-15	10.3863	23.9862	1.82087	1.82087	IKBIP	IKBKB interacting protein
7971950	1.2e-06	2.41e-08	-6.417	8.82175	-1.82044	1.82044	DACH1	dachshund family transcription factor 1
7929012	2.01e-08	2.25e-10	7.60635	13.4057	1.81999	1.81999	STAMBPL1	STAM binding protein like 1
8091972	7.48e-08	1e-09	-7.227	11.9371	-1.81917	1.81917	MECOM	MDS1 and EVI1 complex locus
8016808	2.65e-16	4.13e-19	-12.984	33.1463	-1.81394	1.81394	CA10	carbonic anhydrase 10
8064790	7.48e-08	1e-09	7.22707	11.9374	1.81114	1.81114	RASSF2	Ras association domain family member 2
7968556	0.0352	0.00618	-2.8381	-3.13028	-1.8081	1.8081	KL	klotho
8101131	0.00706	0.000791	3.53505	-1.22179	1.80796	1.80796	CXCL11	C-X-C motif chemokine ligand 11
8036155	1.98e-06	4.24e-08	-6.27181	8.26905	-1.80546	1.80546	PRODH2	proline dehydrogenase 2
7962000	0.0163	0.00228	3.18749	-2.21053	1.80283	1.80283	PTHLH	parathyroid hormone like hormone
8083968	0.000225	1.19e-05	4.77446	2.78458	1.80114	1.80114	NLGN1	neuroligin 1
8038633	1.1e-09	8.56e-12	-8.43762	16.6197	-1.79943	1.79943	KLK1	kallikrein 1
8038683	5.68e-08	7.37e-10	-7.30573	12.2417	-1.79869	1.79869	KLK6	kallikrein related peptidase 6
7915472	5.09e-10	3.68e-12	8.65316	17.4489	1.79849	1.79849	SLC2A1	solute carrier family 2 member 1
7917576	0.00387	0.000375	3.76909	-0.51854	1.78817	1.78817	GBP5	guanylate binding protein 5
8048864	0.0454	0.00862	2.71557	-3.43369	1.78788	1.78788	CCL20	C-C motif chemokine ligand 20
7901175	0.0582	0.0121	-2.5887	-3.7368	-1.7826	1.7826	TSPAN1	tetraspanin 1
7905047	8.74e-05	3.87e-06	5.0834	3.8732	1.78095	1.78095	FCGR1CP///FCGR1B///FCGR1A	Fc fragment of IgG receptor Ic, pseudogene///Fc fragment of IgG receptor Ib///Fc fragment of IgG receptor Ia
8103094	5.89e-09	5.54e-11	-7.96238	14.7843	-1.77704	1.77704	NR3C2	nuclear receptor subfamily 3 group C member 2
8021081	0.000353	2.05e-05	-4.62322	2.26261	-1.77696	1.77696	SLC14A1	solute carrier family 14 member 1 (Kidd blood group)
7930148	3.66e-09	3.3e-11	-8.0939	15.293	-1.77532	1.77532	SFXN2	sideroflexin 2
8105899	0.00112	8.28e-05	-4.2226	0.91995	-1.7744	1.7744	MARVELD2	MARVEL domain containing 2
8177498	0.00112	8.28e-05	-4.2226	0.91995	-1.7744	1.7744	MARVELD2	MARVEL domain containing 2
8080168	1.21e-06	2.44e-08	-6.41407	8.81059	-1.77379	1.77379	ACY1	aminoacylase 1
8113278	0.0142	0.00191	-3.2473	-2.04542	-1.77016	1.77016	LIX1	limb and CNS expressed 1
7921882	0.000199	1.03e-05	4.81449	2.92399	1.76906	1.76906	OLFML2B	olfactomedin like 2B
7923086	5.39e-06	1.37e-07	5.96771	7.12004	1.7641	1.7641	ASPM	abnormal spindle microtubule assembly
7946365	0.000146	7.16e-06	-4.91513	3.27671	-1.76368	1.76368	STK33	serine/threonine kinase 33
8135587	1.32e-16	1.94e-19	13.2043	33.8823	1.76031	1.76031	CAV2///LOC105375463///CAV2	caveolin 2///uncharacterized LOC105375463///caveolin 2
8162940	3.92e-13	1.26e-15	10.7423	25.2915	1.75851	1.75851	ABCA1	ATP binding cassette subfamily A member 1
8018761	0.0012	8.94e-05	-4.20036	0.84729	-1.7578	1.7578	ST6GALNAC2	ST6 N-acetylgalactosaminide alpha-2,6-sialyltransferase 2
8180372	0.0012	8.94e-05	-4.20036	0.84729	-1.7578	1.7578	ST6GALNAC2	ST6 N-acetylgalactosaminide alpha-2,6-sialyltransferase 2
8169263	0.000733	4.96e-05	4.37118	1.41069	1.75498	1.75498	VSIG1	V-set and immunoglobulin domain containing 1
8106743	0.000491	3.07e-05	4.50844	1.87172	1.75388	1.75388	VCAN	versican
8086615	4.13e-06	1.02e-07	-6.04535	7.41216	-1.7508	1.7508	LRRC2	leucine rich repeat containing 2
8095080	0.00506	0.000519	-3.66807	-0.82558	-1.74936	1.74936	PDGFRA	platelet derived growth factor receptor alpha
8110841	4.75e-07	8.34e-09	6.68845	9.86075	1.7455	1.7455	LPCAT1	lysophosphatidylcholine acyltransferase 1
8070073	0.00642	0.000703	-3.57248	-1.11125	-1.7435	1.7435	C21orf62	chromosome 21 open reading frame 62
8173059	1.03e-11	4.46e-14	-9.79536	21.7885	-1.74345	1.74345	WNK3	WNK lysine deficient protein kinase 3
8065071	0.063	0.0134	-2.54703	-3.83385	-1.74241	1.74241	FLRT3	fibronectin leucine rich transmembrane protein 3
8000184	3.37e-05	1.24e-06	5.38849	4.97406	1.74186	1.74186	IGSF6	immunoglobulin superfamily member 6
8079422	1.76e-05	5.59e-07	-5.60027	5.75113	-1.73835	1.73835	TDGF1	teratocarcinoma-derived growth factor 1
8046695	1.09e-09	8.42e-12	8.4418	16.6358	1.73833	1.73833	ITGA4	integrin subunit alpha 4
7961151	0.0111	0.00139	3.35211	-1.75093	1.73731	1.73731	KLRC4-KLRK1///KLRK1	KLRC4-KLRK1 readthrough///killer cell lectin like receptor K1
8160024	2.68e-06	6e-08	-6.1826	7.93067	-1.73557	1.73557	GLDC	glycine decarboxylase
8104074	6.29e-11	3.49e-13	-9.25918	19.7645	-1.73553	1.73553	MTNR1A	melatonin receptor 1A
8040223	1.08e-06	2.13e-08	6.44888	8.94343	1.73538	1.73538	RRM2	ribonucleotide reductase regulatory subunit M2
7999920	1.44e-11	6.37e-14	-9.70189	21.4376	-1.73316	1.73316	GP2	glycoprotein 2
8039144	5.22e-06	1.32e-07	-5.97752	7.15688	-1.72994	1.72994	TMC4	transmembrane channel like 4
7965403	0.159	0.0469	-2.029	-4.93025	-1.72747	1.72747	LUM	lumican
8061579	5.9e-06	1.55e-07	5.93621	7.00176	1.72504	1.72504	TPX2	TPX2, microtubule nucleation factor
7914270	4.91e-09	4.54e-11	8.01278	14.9793	1.72433	1.72433	LAPTM5	lysosomal protein transmembrane 5
7952526	1.53e-05	4.72e-07	5.64503	5.91654	1.72346	1.72346	CDON	cell adhesion associated, oncogene regulated
8095110	3.83e-05	1.45e-06	-5.34831	4.8278	-1.72305	1.72305	KIT	KIT proto-oncogene receptor tyrosine kinase
8110685	0.000163	8.13e-06	-4.88022	3.154	-1.72269	1.72269	PP7080///PP7080	uncharacterized LOC25845///uncharacterized LOC25845
8121794	6.07e-07	1.12e-08	6.61364	9.57377	1.71898	1.71898	SMPDL3A	sphingomyelin phosphodiesterase acid like 3A
8113666	8.14e-06	2.27e-07	5.83689	6.62991	1.71513	1.71513	SEMA6A	semaphorin 6A
7992934	5.4e-13	1.8e-15	-10.646	24.94	-1.71394	1.71394	DNASE1	deoxyribonuclease 1
7938390	4.18e-08	5.16e-10	7.39597	12.591	1.71354	1.71354	ADM	adrenomedullin
8126279	1.95e-05	6.31e-07	5.56846	5.6338	1.71038	1.71038	TREM2	triggering receptor expressed on myeloid cells 2
8030866	5.68e-08	7.39e-10	7.30504	12.239	1.70939	1.70939	FPR3	formyl peptide receptor 3
7951351	0.000231	1.24e-05	4.76428	2.74921	1.70719	1.70719	PDGFD	platelet derived growth factor D
7996377	0.00241	0.00021	3.94644	0.03271	1.70666	1.70666	CES4A	carboxylesterase 4A
8103769	0.0373	0.00666	-2.81075	-3.19889	-1.7034	1.7034	HPGD	hydroxyprostaglandin dehydrogenase 15-(NAD)
8114964	0.0622	0.0132	-2.55413	-3.8174	-1.70119	1.70119	SPINK1	serine peptidase inhibitor, Kazal type 1
8022283	0.000298	1.67e-05	4.68073	2.46017	1.69323	1.69323	PIEZO2	piezo type mechanosensitive ion channel component 2
7904433	0.00019	9.77e-06	-4.82942	2.97611	-1.69278	1.69278	PHGDH	phosphoglycerate dehydrogenase
8054580	2.4e-05	8.12e-07	5.50188	5.3889	1.69021	1.69021	BUB1	BUB1 mitotic checkpoint serine/threonine kinase
7916944	0.000503	3.17e-05	-4.49945	1.84134	-1.68984	1.68984	PTGER3	prostaglandin E receptor 3
8091283	2.71e-06	6.08e-08	6.17887	7.91655	1.68953	1.68953	PLOD2	procollagen-lysine,2-oxoglutarate 5-dioxygenase 2
8121257	1.33e-09	1.04e-11	8.38669	16.4234	1.68911	1.68911	PRDM1	PR/SET domain 1
8109901	6.16e-19	5.92e-22	-14.9613	39.5164	-1.68831	1.68831	FOXI1	forkhead box I1
8096959	0.00186	0.000154	-4.04037	0.33071	-1.68789	1.68789	ANK2	ankyrin 2, neuronal
8058708	0.00109	7.96e-05	4.23418	0.95789	1.68774	1.68774	ABCA12	ATP binding cassette subfamily A member 12
7963786	5.61e-08	7.25e-10	7.3099	12.2579	1.68486	1.68486	ITGA5	integrin subunit alpha 5
8096425	1.04e-08	1.07e-10	-7.79405	14.1327	-1.68327	1.68327	CCSER1	coiled-coil serine rich protein 1
8139033	4.46e-05	1.71e-06	5.30283	4.66265	1.68164	1.68164	AOAH	acyloxyacyl hydrolase
7952249	0.00175	0.000142	-4.06391	0.40602	-1.67941	1.67941	USP2	ubiquitin specific peptidase 2
8108301	6.69e-05	2.82e-06	5.16899	4.17965	1.67917	1.67917	KIF20A	kinesin family member 20A
7933772	0.000373	2.19e-05	-4.60391	2.19652	-1.67331	1.67331	ANK3	ankyrin 3, node of Ranvier (ankyrin G)
8175155	2.65e-16	4.13e-19	-12.9838	33.1456	-1.67319	1.67319	FRMD7	FERM domain containing 7
7919133	5.12e-05	2.04e-06	5.25658	4.49522	1.67146	1.67146	FCGR1CP///FCGR1B///FCGR1A	Fc fragment of IgG receptor Ic, pseudogene///Fc fragment of IgG receptor Ib///Fc fragment of IgG receptor Ia
7924508	2.58e-13	7.9e-16	-10.8678	25.7484	-1.66927	1.66927	SUSD4	sushi domain containing 4
7990545	0.000128	6.07e-06	4.96052	3.43681	1.66879	1.66879	CSPG4	chondroitin sulfate proteoglycan 4
8127502	1.57e-05	4.87e-07	-5.63684	5.88623	-1.66746	1.66746	LINC00472	long intergenic non-protein coding RNA 472
8095886	0.0162	0.00226	3.18956	-2.20485	1.66727	1.66727	CXCL13	C-X-C motif chemokine ligand 13
7909681	0.0052	0.000539	-3.65662	-0.86006	-1.66649	1.66649	PROX1	prospero homeobox 1
8056343	3.28e-08	3.87e-10	-7.46898	12.8737	-1.66305	1.66305	COBLL1	cordon-bleu WH2 repeat protein like 1
8140782	0.00833	0.000969	-3.46967	-1.41305	-1.66155	1.66155	ABCB1	ATP binding cassette subfamily B member 1
7955908	9.3e-06	2.65e-07	5.79628	6.47839	1.66048	1.66048	NCKAP1L	NCK associated protein 1 like
8013660	4.75e-07	8.34e-09	6.68859	9.86131	1.65717	1.65717	ALDOC	aldolase, fructose-bisphosphate C
7910001	4.54e-05	1.75e-06	5.29733	4.64272	1.65702	1.65702	DEGS1	delta 4-desaturase, sphingolipid 1
8047738	1.15e-06	2.29e-08	6.43008	8.87167	1.65654	1.65654	NRP2	neuropilin 2
8117594	0.00153	0.000121	4.11028	0.55505	1.65647	1.65647	HIST1H2BM	histone cluster 1, H2bm
8040695	0.0068	0.000755	3.54975	-1.17847	1.65487	1.65487	KCNK3	potassium two pore domain channel subfamily K member 3
7984524	2.65e-05	9.24e-07	-5.46765	5.26338	-1.65361	1.65361	PAQR5	progestin and adipoQ receptor family member 5
8062190	1.8e-10	1.12e-12	8.95958	18.623	1.643	1.643	SPAG4	sperm associated antigen 4
8154047	1.64e-19	1.38e-22	-15.4228	40.9278	-1.6374	1.6374	DMRT2	doublesex and mab-3 related transcription factor 2
8008454	1.12e-07	1.59e-09	7.10995	11.4847	1.63738	1.63738	ABCC3	ATP binding cassette subfamily C member 3
8093219	1.08e-12	3.8e-15	-10.446	24.206	-1.63654	1.63654	BDH1	3-hydroxybutyrate dehydrogenase, type 1
8000757	3.03e-05	1.1e-06	5.422	5.09637	1.6346	1.6346	DOC2A	double C2 domain alpha
8007154	0.000388	2.32e-05	4.5882	2.14286	1.63065	1.63065	FKBP10	FK506 binding protein 10
8092836	0.0435	0.00815	-2.73643	-3.38277	-1.6306	1.6306	CPN2	carboxypeptidase N subunit 2
8140504	3.01e-10	1.96e-12	-8.81408	18.0663	-1.62813	1.62813	MAGI2	membrane associated guanylate kinase, WW and PDZ domain containing 2
8019842	1.03e-11	4.34e-14	9.80201	21.8134	1.62535	1.62535	TYMS	thymidylate synthetase
7909285	1.05e-14	2.53e-17	-11.8127	29.1235	-1.62521	1.62521	PFKFB2	6-phosphofructo-2-kinase/fructose-2,6-biphosphatase 2
8171587	8.83e-11	5.12e-13	9.16034	19.3887	1.62357	1.62357	PHKA2	phosphorylase kinase regulatory subunit alpha 2
8073890	0.000385	2.3e-05	4.59058	2.15096	1.6231	1.6231	GRAMD4	GRAM domain containing 4
8098611	4.43e-08	5.59e-10	7.37577	12.5128	1.623	1.623	TLR3	toll like receptor 3
8109843	6.15e-06	1.63e-07	5.92379	6.95516	1.62259	1.62259	DOCK2	dedicator of cytokinesis 2
8004408	0.000889	6.25e-05	4.30448	1.18931	1.62257	1.62257	FGF11	fibroblast growth factor 11
8044149	6.12e-05	2.53e-06	-5.1977	4.28286	-1.62204	1.62204	PLGLA///PLGLB1///PLGLB2///PLG	plasminogen-like A (pseudogene)///plasminogen-like B1///plasminogen-like B2///plasminogen
8178295	0.00226	0.000193	3.97127	0.11109	1.62083	1.62083	UBD	ubiquitin D
7906486	0.000545	3.48e-05	4.47323	1.7528	1.62006	1.62006	SLAMF8	SLAM family member 8
8124650	0.00228	0.000196	3.96727	0.09844	1.61977	1.61977	UBD	ubiquitin D
8014248	2.48e-06	5.5e-08	6.20477	8.01467	1.61916	1.61916	SLFN13	schlafen family member 13
8073088	6.42e-05	2.68e-06	5.18227	4.22736	1.61846	1.61846	APOBEC3G	apolipoprotein B mRNA editing enzyme catalytic subunit 3G
7997504	3.13e-05	1.14e-06	5.41217	5.06047	1.61829	1.61829	CDH13	cadherin 13
8108217	0.000968	6.93e-05	4.27478	1.0913	1.61819	1.61819	TGFBI	transforming growth factor beta induced
8137485	2.59e-13	8e-16	-10.8646	25.7367	-1.61709	1.61709	DPP6	dipeptidyl peptidase like 6
8174654	1.09e-07	1.55e-09	-7.11672	11.5108	-1.61692	1.61692	KLHL13	kelch like family member 13
8124388	0.000128	6.05e-06	4.96119	3.43917	1.6158	1.6158	HIST1H3B	histone cluster 1, H3b
8106689	0.0208	0.00312	-3.07926	-2.50376	-1.61548	1.61548	CKMT2	creatine kinase, mitochondrial 2
7969640	0.0133	0.00176	-3.27452	-1.96955	-1.61288	1.61288	CLDN10	claudin 10
8019357	6.89e-09	6.73e-11	-7.91286	14.5927	-1.60956	1.60956	DCXR	dicarbonyl and L-xylulose reductase
8009746	4.49e-11	2.39e-13	-9.35757	20.1379	-1.6092	1.6092	SLC16A5	solute carrier family 16 member 5
7906720	1.42e-05	4.37e-07	5.66545	5.99215	1.60883	1.60883	FCER1G	Fc fragment of IgE receptor Ig
8124531	0.0019	0.000157	4.03313	0.3076	1.60693	1.60693	HIST1H3I	histone cluster 1, H3i
8148040	0.0136	0.00181	-3.26453	-1.99746	-1.60445	1.60445	MAL2	mal, T-cell differentiation protein 2 (gene/pseudogene)
8139057	4.16e-06	1.03e-07	6.0428	7.40255	1.60439	1.60439	ELMO1	engulfment and cell motility 1
7956401	4.85e-11	2.59e-13	9.33647	20.0579	1.60361	1.60361	SHMT2	serine hydroxymethyltransferase 2
8017262	4.57e-08	5.78e-10	7.36717	12.4795	1.60202	1.60202	BRIP1	BRCA1 interacting protein C-terminal helicase 1
8135804	2.73e-11	1.34e-13	-9.5087	20.7096	-1.60177	1.60177	ASB15	ankyrin repeat and SOCS box containing 15
8099721	1.28e-08	1.35e-10	7.73609	13.9082	1.60175	1.60175	SEL1L3	SEL1L family member 3
8096704	0.00057	3.68e-05	-4.45689	1.69776	-1.60169	1.60169	NPNT	nephronectin
7987815	1.27e-14	3.16e-17	-11.75	28.9032	-1.59885	1.59885	PLA2G4F	phospholipase A2 group IVF
8063115	0.0316	0.00535	2.88973	-2.99935	1.59736	1.59736	MMP9	matrix metallopeptidase 9
8029489	4.17e-06	1.04e-07	-6.04126	7.39676	-1.59699	1.59699	BCAM	basal cell adhesion molecule (Lutheran blood group)
8114845	4.31e-08	5.37e-10	7.38609	12.5527	1.59559	1.59559	PRELID2	PRELI domain containing 2
7905060	6.94e-05	2.93e-06	5.15837	4.14153	1.59508	1.59508	FCGR1CP///FCGR1B///FCGR1A	Fc fragment of IgG receptor Ic, pseudogene///Fc fragment of IgG receptor Ib///Fc fragment of IgG receptor Ia
8038556	0.041	0.00753	-2.76547	-3.31136	-1.59498	1.59498	NAPSA	napsin A aspartic peptidase
7996819	2.13e-05	7.03e-07	-5.54004	5.52917	-1.59443	1.59443	CDH3	cadherin 3
7901293	8.11e-08	1.1e-09	-7.20379	11.8474	-1.59422	1.59422	CYP4A22	cytochrome P450 family 4 subfamily A member 22
8104930	0.000138	6.66e-06	4.93492	3.34643	1.59352	1.59352	SLC1A3	solute carrier family 1 member 3
7959251	2.32e-09	1.97e-11	8.22475	15.7986	1.59344	1.59344	P2RX7	purinergic receptor P2X 7
8072436	2.15e-18	2.38e-21	-14.528	38.1657	-1.59193	1.59193	INPP5J	inositol polyphosphate-5-phosphatase J
8014316	0.00315	0.000291	3.84752	-0.27663	1.58975	1.58975	CCL5	C-C motif chemokine ligand 5
7934278	3.82e-10	2.59e-12	8.74293	17.7935	1.58673	1.58673	P4HA1///P4HA1	prolyl 4-hydroxylase subunit alpha 1///prolyl 4-hydroxylase subunit alpha 1
8095834	1.26e-05	3.82e-07	-5.70103	6.12407	-1.5866	1.5866	SHROOM3	shroom family member 3
7995825	6.35e-05	2.65e-06	-5.18565	4.23951	-1.58461	1.58461	MT1F	metallothionein 1F
7912347	2.13e-09	1.8e-11	-8.24859	15.8906	-1.58026	1.58026	CASZ1	castor zinc finger 1
7979085	1.02e-06	1.99e-08	6.46595	9.00861	1.58015	1.58015	PYGL	phosphorylase, glycogen, liver
8068883	3.56e-06	8.42e-08	-6.09478	7.59862	-1.57988	1.57988	LOC102724652///CRYAA	alpha-crystallin A chain///crystallin alpha A
8014233	7.96e-07	1.52e-08	6.5354	9.27413	1.57955	1.57955	SLFN11	schlafen family member 11
8112376	4.72e-07	8.26e-09	6.69108	9.87086	1.57945	1.57945	CENPK	centromere protein K
8103494	0.00829	0.000964	-3.47136	-1.40814	-1.57756	1.57756	NPY1R///NPY1R	neuropeptide Y receptor Y1///neuropeptide Y receptor Y1
8082133	3.7e-06	8.89e-08	6.08067	7.54536	1.57611	1.57611	PDIA5	protein disulfide isomerase family A member 5
7920642	7.84e-05	3.4e-06	-5.11832	3.99801	-1.5754	1.5754	MUC1	mucin 1, cell surface associated
7923958	1.13e-07	1.61e-09	-7.10736	11.4747	-1.57442	1.57442	C1orf116	chromosome 1 open reading frame 116
8083034	0.000139	6.75e-06	-4.93131	3.33373	-1.57321	1.57321	CLSTN2	calsyntenin 2
7989199	1e-05	2.91e-07	-5.77177	6.38705	-1.57314	1.57314	ALDH1A2	aldehyde dehydrogenase 1 family member A2
8115205	2.92e-08	3.39e-10	-7.50258	13.0038	-1.57214	1.57214	ZNF300P1	zinc finger protein 300 pseudogene 1
8134018	1.08e-13	3.06e-16	-11.1254	26.6797	-1.57134	1.57134	ZNF804B	zinc finger protein 804B
8120961	2.44e-08	2.8e-10	-7.55146	13.1931	-1.56926	1.56926	MRAP2	melanocortin 2 receptor accessory protein 2
8180303	0.24	0.0851	1.75086	-5.42962	1.56759	1.56759	SAA2	serum amyloid A2
8026456	0.00401	0.000392	-3.75569	-0.55956	-1.56701	1.56701	CYP4F3	cytochrome P450 family 4 subfamily F member 3
8031646	0.00316	0.000292	-3.84636	-0.28023	-1.56672	1.56672	ZNF667-AS1	ZNF667 antisense RNA 1 (head to head)
8031238	3.39e-06	7.9e-08	6.1114	7.66135	1.56602	1.56602	LILRB4	leukocyte immunoglobulin like receptor B4
8014768	1.15e-05	3.43e-07	5.72914	6.22845	1.56311	1.56311	PLXDC1	plexin domain containing 1
7908553	7.11e-05	3.03e-06	5.14967	4.11029	1.56124	1.56124	PTPRC	protein tyrosine phosphatase, receptor type C
8135069	0.0156	0.00216	3.20593	-2.15985	1.55999	1.55999	SERPINE1	serpin family E member 1
8029056	0.000302	1.69e-05	4.67692	2.44705	1.55924	1.55924	TMEM91	transmembrane protein 91
7965918	0.00095	6.77e-05	4.28154	1.11355	1.55729	1.55729	NT5DC3	5'-nucleotidase domain containing 3
8016463	9.76e-10	7.39e-12	-8.475	16.7637	-1.55407	1.55407	HOXB6	homeobox B6
7935116	0.314	0.127	-1.54905	-5.75032	-1.54991	1.54991	RBP4	retinol binding protein 4
7929664	2.39e-06	5.28e-08	-6.21539	8.05494	-1.54907	1.54907	HOGA1	4-hydroxy-2-oxoglutarate aldolase 1
8081657	3.15e-05	1.15e-06	5.41046	5.05421	1.54744	1.54744	CD200	CD200 molecule
8151101	1.57e-05	4.88e-07	5.63628	5.88417	1.54726	1.54726	MYBL1	MYB proto-oncogene like 1
7901613	1.52e-09	1.2e-11	-8.35073	16.2848	-1.54648	1.54648	ACOT11	acyl-CoA thioesterase 11
8151334	3.28e-05	1.2e-06	5.39796	5.0086	1.54387	1.54387	MSC	musculin
8033043	0.00217	0.000184	-3.98696	0.16076	-1.54367	1.54367	FUT6	fucosyltransferase 6
7912975	0.00132	0.0001	-4.16753	0.74036	-1.54277	1.54277	ALDH4A1	aldehyde dehydrogenase 4 family member A1
8161654	0.00886	0.00105	-3.44421	-1.48689	-1.53974	1.53974	TRPM3	transient receptor potential cation channel subfamily M member 3
8073068	5.74e-05	2.34e-06	5.21967	4.36202	1.53738	1.53738	APOBEC3C	apolipoprotein B mRNA editing enzyme catalytic subunit 3C
8114300	2.25e-10	1.42e-12	-8.89717	18.3844	-1.53719	1.53719	KLHL3	kelch like family member 3
8067869	2.46e-09	2.1e-11	-8.20934	15.7391	-1.53703	1.53703	RBM11	RNA binding motif protein 11
8170695	1.89e-13	5.51e-16	-10.9656	26.1027	-1.53459	1.53459	DUSP9	dual specificity phosphatase 9
8039257	5.33e-05	2.15e-06	5.24217	4.44318	1.53359	1.53359	LAIR1	leukocyte associated immunoglobulin like receptor 1
7970954	0.0121	0.00156	3.31423	-1.8581	1.5334	1.5334	DCLK1	doublecortin like kinase 1
8001007	0.00239	0.000208	-3.94991	0.04367	-1.53314	1.53314	PRSS8	protease, serine 8
7983969	2.82e-05	9.97e-07	5.44742	5.18931	1.53256	1.53256	CCNB2	cyclin B2
7947165	0.206	0.0679	-1.85943	-5.24248	-1.53219	1.53219	SLC5A12	solute carrier family 5 member 12
8001830	1.47e-08	1.58e-10	-7.69662	13.7553	-1.53063	1.53063	CMTM4	CKLF like MARVEL transmembrane domain containing 4
8143518	4.96e-10	3.56e-12	-8.66173	17.4819	-1.53052	1.53052	TRPV5	transient receptor potential cation channel subfamily V member 5
8108981	3.44e-07	5.86e-09	-6.77876	10.2078	-1.52953	1.52953	STK32A	serine/threonine kinase 32A
8035825	0.00634	0.000689	-3.57874	-1.09271	-1.52951	1.52951	ZNF676	zinc finger protein 676
8072678	2.81e-06	6.34e-08	6.16824	7.87631	1.52661	1.52661	HMOX1	heme oxygenase 1
7898799	6.18e-06	1.64e-07	5.92233	6.94971	1.52569	1.52569	C1QC	complement C1q C chain
7985285	1.03e-06	2.03e-08	-6.4614	8.99124	-1.52443	1.52443	ARNT2	aryl hydrocarbon receptor nuclear translocator 2
8159992	1.77e-09	1.46e-11	-8.30132	16.0942	-1.52258	1.52258	ERMP1	endoplasmic reticulum metallopeptidase 1
8146115	4.35e-05	1.66e-06	-5.31093	4.69201	-1.52258	1.52258	C8orf4	chromosome 8 open reading frame 4
8016094	0.000277	1.53e-05	4.70396	2.5403	1.52154	1.52154	GJC1	gap junction protein gamma 1
7960874	2.37e-05	8.02e-07	5.50498	5.4003	1.52099	1.52099	C3AR1	complement component 3a receptor 1
7981427	0.00225	0.000193	-3.97241	0.11471	-1.51788	1.51788	CKB	creatine kinase B
8070826	3.96e-06	9.7e-08	6.05819	7.46055	1.51731	1.51731	ITGB2	integrin subunit beta 2
8035789	0.000512	3.23e-05	4.49391	1.82259	1.51699	1.51699	ZNF826P	zinc finger protein 826, pseudogene
7997188	0.41	0.192	1.31841	-6.0722	1.51619	1.51619	HP	haptoglobin
7959102	4.98e-06	1.26e-07	5.99086	7.20701	1.51406	1.51406	HSPB8	heat shock protein family B (small) member 8
8149877	2.57e-05	8.86e-07	5.47867	5.30378	1.51298	1.51298	PNMA2	paraneoplastic Ma antigen 2
8136067	4.13e-11	2.16e-13	-9.38382	20.2373	-1.5125	1.5125	TSPAN33	tetraspanin 33
7921625	0.0105	0.00131	3.37275	-1.69218	1.50999	1.50999	SLAMF6	SLAM family member 6
7905283	9.99e-05	4.51e-06	-5.04127	3.72309	-1.50999	1.50999	ANXA9	annexin A9
7903980	3.39e-06	7.91e-08	6.11105	7.66003	1.50717	1.50717	C1orf162	chromosome 1 open reading frame 162
7983527	0.000132	6.32e-06	-4.94908	3.39639	-1.50683	1.50683	SEMA6D	semaphorin 6D
8149986	5.92e-07	1.08e-08	6.62146	9.60374	1.50603	1.50603	ZNF395	zinc finger protein 395
8134463	0.0398	0.00723	2.78057	-3.27401	1.50584	1.50584	NPTX2	neuronal pentraxin 2
8151512	1.83e-09	1.51e-11	8.29196	16.0581	1.50527	1.50527	PAG1	phosphoprotein membrane anchor with glycosphingolipid microdomains 1
8094301	0.00961	0.00116	-3.41156	-1.58104	-1.50185	1.50185	SLIT2	slit guidance ligand 2
7970251	1.92e-10	1.2e-12	-8.94075	18.5511	-1.50086	1.50086	PROZ	protein Z, vitamin K dependent plasma glycoprotein
7944185	0.0194	0.00286	3.10923	-2.42329	1.49826	1.49826	CD3G	CD3g molecule
8006681	8.6e-15	2.01e-17	-11.8759	29.3453	-1.49774	1.49774	LHX1	LIM homeobox 1
7965573	0.0121	0.00155	-3.31695	-1.85042	-1.4969	1.4969	NTN4	netrin 4
8117288	0.156	0.0455	2.04257	-4.90423	1.49687	1.49687	SCGN	secretagogin, EF-hand calcium binding protein
7929334	5.46e-06	1.4e-07	5.96273	7.1013	1.49668	1.49668	CEP55	centrosomal protein 55
8151341	0.000293	1.64e-05	4.68565	2.47714	1.4959	1.4959	TRPA1	transient receptor potential cation channel subfamily A member 1
7946340	3.46e-05	1.28e-06	-5.38065	4.9455	-1.49525	1.49525	RIC3	RIC3 acetylcholine receptor chaperone
8180411	0.000136	6.55e-06	4.93966	3.36316	1.4925	1.4925	ELMO1	engulfment and cell motility 1
7931168	0.00013	6.2e-06	-4.95444	3.41533	-1.49195	1.49195	ACADSB	acyl-CoA dehydrogenase, short/branched chain
8002830	3.17e-08	3.71e-10	-7.47978	12.9155	-1.49131	1.49131	LDHD	lactate dehydrogenase D
8117458	8.44e-08	1.15e-09	7.19198	11.8017	1.4911	1.4911	BTN3A1	butyrophilin subfamily 3 member A1
8044212	0.0064	0.0007	-3.5738	-1.10736	-1.4907	1.4907	SULT1C2	sulfotransferase family 1C member 2
8080964	0.111	0.0287	2.24198	-4.50478	1.4907	1.4907	GXYLT2	glucoside xylosyltransferase 2
8016473	3.74e-12	1.46e-14	-10.0885	22.8833	-1.49012	1.49012	HOXB8	homeobox B8
8063000	0.00195	0.000162	-4.02493	0.28144	-1.48745	1.48745	WFDC2	WAP four-disulfide core domain 2
7995128	3.52e-06	8.33e-08	6.09757	7.60912	1.4852	1.4852	ITGAX	integrin subunit alpha X
7940259	2e-08	2.23e-10	7.60865	13.4146	1.48436	1.48436	MS4A14///MS4A7	membrane spanning 4-domains A14///membrane spanning 4-domains A7
8022646	4.84e-10	3.46e-12	-8.66887	17.5093	-1.48376	1.48376	KCTD1	potassium channel tetramerization domain containing 1
7952205	7e-06	1.89e-07	5.88485	6.80928	1.48334	1.48334	MCAM	melanoma cell adhesion molecule
7975876	9.26e-16	1.7e-18	-12.5759	31.7657	-1.48294	1.48294	ESRRB	estrogen related receptor beta
7912224	0.00153	0.000121	4.11199	0.56057	1.47948	1.47948	SLC2A5	solute carrier family 2 member 5
7919800	4.36e-05	1.67e-06	5.3101	4.68901	1.47726	1.47726	CTSS	cathepsin S
8124337	0.191	0.0611	-1.90849	-5.15462	-1.47698	1.47698	SLC17A1	solute carrier family 17 member 1
7898805	2.94e-05	1.05e-06	5.43415	5.14079	1.47557	1.47557	C1QB	complement C1q B chain
8004510	4.23e-11	2.22e-13	9.37624	20.2086	1.47545	1.47545	CD68	CD68 molecule
8146393	0.153	0.0442	2.05549	-4.87932	1.47486	1.47486	C8orf22	chromosome 8 open reading frame 22
8062728	0.00112	8.32e-05	-4.22145	0.9162	-1.47373	1.47373	SGK2	SGK2, serine/threonine kinase 2
7934997	1.58e-05	4.91e-07	5.63468	5.87826	1.47273	1.47273	PPP1R3C	protein phosphatase 1 regulatory subunit 3C
7942332	0.00749	0.00085	-3.51178	-1.29014	-1.47246	1.47246	FOLR1	folate receptor 1
7906613	0.0147	0.002	3.2308	-2.09119	1.47222	1.47222	SLAMF7	SLAM family member 7
8016646	0.0156	0.00216	3.20499	-2.16246	1.47152	1.47152	COL1A1	collagen type I alpha 1 chain
7907297	7.33e-05	3.13e-06	-5.14063	4.0779	-1.47101	1.47101	FMO4	flavin containing monooxygenase 4
8111739	0.000943	6.72e-05	4.28365	1.12051	1.46937	1.46937	FYB	FYN binding protein
7996430	1.21e-07	1.75e-09	7.08584	11.3915	1.46905	1.46905	HSF4	heat shock transcription factor 4
7934570	0.000811	5.61e-05	4.33601	1.29373	1.46805	1.46805	KCNMA1	potassium calcium-activated channel subfamily M alpha 1
8124897	0.000113	5.2e-06	5.00247	3.58529	1.46733	1.46733	PSORS1C3	psoriasis susceptibility 1 candidate 3 (non-protein coding)
8179727	0.000113	5.2e-06	5.00247	3.58529	1.46733	1.46733	PSORS1C3	psoriasis susceptibility 1 candidate 3 (non-protein coding)
8082035	5.46e-06	1.4e-07	5.96214	7.09912	1.46709	1.46709	CD86	CD86 molecule
8175815	0.00258	0.000228	3.92172	-0.04502	1.46557	1.46557	PNCK	pregnancy up-regulated nonubiquitous CaM kinase
8096682	1.95e-05	6.32e-07	-5.56813	5.63257	-1.46538	1.46538	ARHGEF38	Rho guanine nucleotide exchange factor 38
7985192	1.21e-14	2.94e-17	-11.77	28.9736	-1.46317	1.46317	HYKK	hydroxylysine kinase
8016387	0.00112	8.3e-05	-4.22189	0.91763	-1.46289	1.46289	PRR15L	proline rich 15 like
7923608	0.289	0.112	-1.61397	-5.65106	-1.46269	1.46269	REN	renin
7909708	1.76e-05	5.61e-07	5.5995	5.74828	1.4598	1.4598	CENPF	centromere protein F
7912659	0.0234	0.00363	-3.02726	-2.64206	-1.45734	1.45734	AGMAT	agmatinase
8115734	4.45e-07	7.77e-09	6.70654	9.93024	1.45668	1.45668	LCP2	lymphocyte cytosolic protein 2
8009502	0.000485	3.02e-05	4.51278	1.88644	1.45496	1.45496	KCNJ2	potassium voltage-gated channel subfamily J member 2
7999291	7.39e-09	7.3e-11	-7.89201	14.5119	-1.45397	1.45397	C16orf89	chromosome 16 open reading frame 89
8098146	0.00174	0.000141	-4.06497	0.40939	-1.45318	1.45318	NPY5R	neuropeptide Y receptor Y5
8117435	3.61e-07	6.18e-09	6.76515	10.1555	1.45276	1.45276	BTN3A2	butyrophilin subfamily 3 member A2
8115455	0.0223	0.00342	3.0483	-2.58631	1.45161	1.45161	HAVCR1	hepatitis A virus cellular receptor 1
7967624	2.31e-10	1.47e-12	8.88846	18.3511	1.45136	1.45136	SLC15A4	solute carrier family 15 member 4
8096176	0.000273	1.5e-05	-4.70944	2.55921	-1.45076	1.45076	PTPN13	protein tyrosine phosphatase, non-receptor type 13
8036710	8.85e-11	5.16e-13	9.15852	19.3818	1.45066	1.45066	GMFG	glia maturation factor gamma
8178826	2.29e-05	7.7e-07	5.51594	5.44056	1.4505	1.4505	HLA-DQB2///HLA-DQB1	major histocompatibility complex, class II, DQ beta 2///major histocompatibility complex, class II, DQ beta 1
8180022	2.29e-05	7.7e-07	5.51594	5.44056	1.4505	1.4505	HLA-DQB2///HLA-DQB1	major histocompatibility complex, class II, DQ beta 2///major histocompatibility complex, class II, DQ beta 1
8091678	0.00629	0.000683	-3.58171	-1.08389	-1.4502	1.4502	VEPH1	ventricular zone expressed PH domain containing 1
8056359	4.13e-07	7.15e-09	-6.72779	10.0118	-1.44982	1.44982	SNORA70F	small nucleolar RNA, H/ACA box 70F
8108724	0.000374	2.2e-05	4.60313	2.19384	1.44939	1.44939	PCDHB10	protocadherin beta 10
7954143	0.00011	5.09e-06	-5.00845	3.60652	-1.44855	1.44855	PTPRO	protein tyrosine phosphatase, receptor type O
8022295	0.00367	0.00035	3.79017	-0.45381	1.44642	1.44642	PIEZO2	piezo type mechanosensitive ion channel component 2
8081826	0.0569	0.0117	-2.59936	-3.71177	-1.44536	1.44536	UPK1B	uroplakin 1B
8068496	1.03e-11	4.5e-14	-9.79299	21.7796	-1.44075	1.44075	SIM2	single-minded family bHLH transcription factor 2
7957452	7.92e-06	2.18e-07	-5.84723	6.66858	-1.43999	1.43999	ALX1	ALX homeobox 1
8145122	0.000267	1.47e-05	4.71596	2.58178	1.43539	1.43539	SLC39A14	solute carrier family 39 member 14
8045664	1.26e-11	5.53e-14	-9.73876	21.5761	-1.43519	1.43519	LYPD6B	LY6/PLAUR domain containing 6B
7912863	5.95e-07	1.09e-08	-6.61993	9.59787	-1.43484	1.43484	LOC102724562///MST1L///MST1P2///MST1	macrophage stimulating 1 pseudogene///macrophage stimulating 1 like///macrophage stimulating 1 pseudogene 2///macrophage stimulating 1
8176219	0.000143	6.98e-06	4.922	3.30092	1.43341	1.43341	CMC4///MTCP1	C-X9-C motif containing 4///mature T-cell proliferation 1
8042391	0.00269	0.00024	3.90655	-0.09257	1.43078	1.43078	PLEK	pleckstrin
8126248	1.64e-05	5.17e-07	-5.62088	5.82726	-1.43011	1.43011	UNC5CL	unc-5 family C-terminal like
8116734	2.23e-05	7.47e-07	5.52392	5.46989	1.42806	1.42806	LY86	lymphocyte antigen 86
8100791	2.53e-10	1.62e-12	-8.86309	18.254	-1.42805	1.42805	UGT2A2///UGT2A1	UDP glucuronosyltransferase family 2 member A2///UDP glucuronosyltransferase family 2 member A1 complex locus
7954055	0.000652	4.34e-05	4.41003	1.54048	1.42782	1.42782	APOLD1	apolipoprotein L domain containing 1
8044143	0.0103	0.00127	-3.381	-1.6686	-1.42703	1.42703	C2orf40	chromosome 2 open reading frame 40
7897132	8.74e-15	2.07e-17	-11.8677	29.3168	-1.42509	1.42509	PRDM16	PR/SET domain 16
7940237	0.00055	3.52e-05	4.46945	1.74006	1.42361	1.42361	MS4A4A	membrane spanning 4-domains A4A
7971922	1.6e-09	1.29e-11	-8.33352	16.2184	-1.42358	1.42358	PCDH9	protocadherin 9
7923596	0.0131	0.00172	-3.28229	-1.94782	-1.42335	1.42335	ETNK2	ethanolamine kinase 2
7917532	0.000336	1.93e-05	4.63908	2.31697	1.42332	1.42332	GBP2	guanylate binding protein 2
8007493	3.74e-12	1.47e-14	-10.087	22.8776	-1.42262	1.42262	ARL4D	ADP ribosylation factor like GTPase 4D
7916862	0.00463	0.000468	-3.70065	-0.72713	-1.42212	1.42212	WLS	wntless Wnt ligand secretion mediator
7969330	1.06e-05	3.11e-07	5.75506	6.32483	1.42153	1.42153	PCDH17	protocadherin 17
7959131	2.02e-07	3.15e-09	-6.93655	10.8154	-1.41916	1.41916	BICDL1	BICD family like cargo adaptor 1
8148317	4.37e-11	2.31e-13	9.36614	20.1703	1.41873	1.41873	MYC	v-myc avian myelocytomatosis viral oncogene homolog
7979307	0.000143	6.95e-06	4.9232	3.30514	1.41531	1.41531	DLGAP5	DLG associated protein 5
8049317	2.99e-05	1.07e-06	5.4279	5.11793	1.41528	1.41528	DGKD	diacylglycerol kinase delta
7960794	0.00153	0.000121	4.11141	0.5587	1.41064	1.41064	CD163	CD163 molecule
8024754	0.0685	0.015	2.50526	-3.92983	1.40997	1.40997	CREB3L3	cAMP responsive element binding protein 3 like 3
8029950	3.34e-09	2.96e-11	8.12129	15.3988	1.40959	1.40959	EHD2	EH domain containing 2
8014063	4.67e-05	1.82e-06	5.28734	4.60652	1.40948	1.40948	EVI2B	ecotropic viral integration site 2B
8012475	0.0012	9.02e-05	-4.19775	0.83877	-1.40845	1.40845	MYH10	myosin, heavy chain 10, non-muscle
7909104	0.000125	5.91e-06	4.96778	3.46249	1.40844	1.40844	CDK18	cyclin dependent kinase 18
7927215	0.0008	5.51e-05	4.34103	1.3104	1.40749	1.40749	ALOX5	arachidonate 5-lipoxygenase
7918533	6.75e-07	1.26e-08	6.5829	9.45597	1.40722	1.40722	TMIGD3///ADORA3///TMIGD3///ADORA3	transmembrane and immunoglobulin domain containing 3///adenosine A3 receptor///transmembrane and immunoglobulin domain containing 3///adenosine A3 receptor
8150138	0.12	0.0317	2.19894	-4.59369	1.40537	1.40537	TEX15	testis expressed 15
7986293	4.13e-05	1.57e-06	5.3259	4.74637	1.40489	1.40489	MCTP2	multiple C2 and transmembrane domain containing 2
8152506	5.79e-05	2.36e-06	-5.21696	4.35223	-1.40386	1.40386	SAMD12	sterile alpha motif domain containing 12
7971461	0.000113	5.23e-06	5.00088	3.57968	1.40346	1.40346	LCP1	lymphocyte cytosolic protein 1
7942123	2.37e-08	2.72e-10	7.55879	13.2215	1.4024	1.4024	CCND1	cyclin D1
8151871	2.4e-05	8.13e-07	5.50153	5.38763	1.40157	1.40157	CCNE2	cyclin E2
8145532	0.00525	0.000545	-3.65305	-0.87079	-1.40156	1.40156	EPHX2	epoxide hydrolase 2
8058765	2.88e-06	6.52e-08	6.16082	7.84825	1.40151	1.40151	FN1	fibronectin 1
7947248	1.28e-05	3.89e-07	5.69572	6.10434	1.40127	1.40127	KIF18A	kinesin family member 18A
7942453	1.31e-10	7.84e-13	-9.05051	18.9702	-1.3998	1.3998	PLEKHB1	pleckstrin homology domain containing B1
7936734	7.59e-05	3.26e-06	-5.12949	4.03798	-1.39719	1.39719	FGFR2	fibroblast growth factor receptor 2
7914974	0.00222	0.000189	3.97877	0.13482	1.39715	1.39715	GRIK3	glutamate ionotropic receptor kainate type subunit 3
7970513	1.6e-06	3.34e-08	6.33345	8.50341	1.39657	1.39657	SKA3	spindle and kinetochore associated complex subunit 3
8019831	2.16e-12	8.06e-15	-10.2463	23.4691	-1.39611	1.39611	CLUL1	clusterin like 1
8013112	0.000357	2.07e-05	-4.61934	2.24931	-1.39505	1.39505	RASD1	ras related dexamethasone induced 1
8036055	0.0269	0.00435	2.9635	-2.80924	1.39504	1.39504	LGI4	leucine rich repeat LGI family member 4
8078386	4.69e-09	4.3e-11	-8.02656	15.0326	-1.39474	1.39474	GPD1L	glycerol-3-phosphate dehydrogenase 1-like
7923347	1.75e-05	5.57e-07	-5.60134	5.75507	-1.39153	1.39153	LAD1	ladinin 1
8147244	0.00212	0.000179	-3.99465	0.18515	-1.39093	1.39093	NECAB1	N-terminal EF-hand calcium binding protein 1
8001547	0.00147	0.000115	-4.12725	0.60985	-1.38905	1.38905	PLLP	plasmolipin
7898793	7.47e-05	3.2e-06	5.13436	4.05542	1.38652	1.38652	C1QA	complement C1q A chain
8082916	0.0939	0.0227	2.33809	-4.30103	1.38648	1.38648	IL20RB	interleukin 20 receptor subunit beta
7970763	0.000476	2.96e-05	4.51918	1.90812	1.38613	1.38613	FLT1	fms related tyrosine kinase 1
7957338	3.03e-06	6.98e-08	-6.14325	7.78178	-1.38569	1.38569	SYT1	synaptotagmin 1
8105040	2.86e-07	4.72e-09	6.83359	10.4187	1.3844	1.3844	OSMR	oncostatin M receptor
8125512	3.51e-06	8.29e-08	6.09892	7.61424	1.38437	1.38437	TAP1	transporter 1, ATP binding cassette subfamily B member
8178867	3.51e-06	8.29e-08	6.09892	7.61424	1.38437	1.38437	TAP1	transporter 1, ATP binding cassette subfamily B member
8180061	3.51e-06	8.29e-08	6.09892	7.61424	1.38437	1.38437	TAP1	transporter 1, ATP binding cassette subfamily B member
8173299	5.7e-06	1.48e-07	5.94851	7.0479	1.38436	1.38436	EDA2R	ectodysplasin A2 receptor
7920873	0.000652	4.33e-05	-4.41026	1.54124	-1.38414	1.38414	SNORA80E	small nucleolar RNA, H/ACA box 80E
7952086	2.8e-05	9.87e-07	-5.44991	5.19844	-1.38412	1.38412	TREH	trehalase
8064388	6.83e-09	6.65e-11	-7.91581	14.6041	-1.38398	1.38398	SLC52A3	solute carrier family 52 member 3
8117583	5.86e-05	2.4e-06	5.21236	4.33567	1.38278	1.38278	HIST1H3H///HIST1H2AI	histone cluster 1, H3h///histone cluster 1, H2ai
8086908	3.08e-15	6.2e-18	-12.207	30.4984	-1.38223	1.38223	PLXNB1	plexin B1
8097841	5.3e-08	6.81e-10	-7.32568	12.3189	-1.38172	1.38172	TRIM2	tripartite motif containing 2
7943349	1.59e-05	4.95e-07	5.63232	5.86954	1.38092	1.38092	ARHGAP42	Rho GTPase activating protein 42
8166906	0.000273	1.5e-05	4.70934	2.55888	1.37957	1.37957	GPR34	G protein-coupled receptor 34
8143499	1.47e-11	6.52e-14	-9.69576	21.4145	-1.37933	1.37933	TRPV6	transient receptor potential cation channel subfamily V member 6
7917530	0.00725	0.000817	3.52445	-1.25296	1.37887	1.37887	GBP2	guanylate binding protein 2
7982854	0.000469	2.91e-05	4.52406	1.92465	1.3779	1.3779	DLL4	delta like canonical Notch ligand 4
8057463	5.98e-06	1.57e-07	-5.93232	6.98715	-1.37748	1.37748	CERKL	ceramide kinase like
8056408	6.49e-06	1.73e-07	-5.9082	6.89673	-1.37506	1.37506	GALNT3	polypeptide N-acetylgalactosaminyltransferase 3
7918657	0.0026	0.00023	3.91883	-0.05408	1.37302	1.37302	PTPN22	protein tyrosine phosphatase, non-receptor type 22
7899394	2.94e-05	1.05e-06	5.433	5.13659	1.37247	1.37247	THEMIS2	thymocyte selection associated family member 2
8094778	0.0657	0.0142	-2.52667	-3.88079	-1.3721	1.3721	UCHL1	ubiquitin C-terminal hydrolase L1
8075886	0.00059	3.83e-05	4.44526	1.65863	1.37197	1.37197	IL2RB	interleukin 2 receptor subunit beta
8103311	0.453	0.226	1.22431	-6.18951	1.37154	1.37154	FGA	fibrinogen alpha chain
8156134	0.0176	0.00252	-3.15262	-2.30581	-1.37113	1.37113	NTRK2	neurotrophic receptor tyrosine kinase 2
8111887	1.12e-05	3.31e-07	-5.73838	6.2628	-1.3706	1.3706	PLCXD3	phosphatidylinositol specific phospholipase C X domain containing 3
8071063	4.21e-08	5.2e-10	-7.3938	12.5826	-1.37039	1.37039	TPTEP1	transmembrane phosphatase with tensin homology pseudogene 1
8003611	2.42e-06	5.35e-08	6.21194	8.04185	1.37014	1.37014	FAM57A	family with sequence similarity 57 member A
8094938	1.75e-12	6.41e-15	-10.3068	23.6928	-1.36949	1.36949	NIPAL1	NIPA like domain containing 1
8149264	1.16e-06	2.31e-08	6.42797	8.86362	1.36843	1.36843	PPP1R3B	protein phosphatase 1 regulatory subunit 3B
8081564	0.0111	0.00139	3.35218	-1.75072	1.36683	1.36683	CD96	CD96 molecule
8022310	0.00207	0.000174	4.00246	0.20994	1.36638	1.36638	PIEZO2	piezo type mechanosensitive ion channel component 2
7945162	3.02e-05	1.09e-06	5.42375	5.10278	1.36555	1.36555	BARX2	BARX homeobox 2
8117589	0.00026	1.42e-05	4.72567	2.61536	1.36528	1.36528	HIST1H3H	histone cluster 1, H3h
8138231	0.000385	2.29e-05	-4.59115	2.15292	-1.36524	1.36524	THSD7A	thrombospondin type 1 domain containing 7A
7938758	0.208	0.069	1.85156	-5.25638	1.36496	1.36496	SAA1	serum amyloid A1
7906400	1.3e-08	1.37e-10	7.73159	13.8908	1.3642	1.3642	IFI16	interferon gamma inducible protein 16
8100338	1.76e-11	8.07e-14	-9.64003	21.2049	-1.36393	1.36393	ERVMER34-1	endogenous retrovirus group MER34 member 1
7919984	0.000169	8.52e-06	-4.86722	3.10841	-1.36331	1.36331	SELENBP1	selenium binding protein 1
8124196	0.00323	0.000301	-3.83734	-0.30821	-1.36102	1.36102	DCDC2	doublecortin domain containing 2
8150509	0.000696	4.67e-05	-4.38875	1.4693	-1.36004	1.36004	PLAT	plasminogen activator, tissue type
8089011	4.58e-05	1.77e-06	5.29354	4.62897	1.35947	1.35947	PROS1	protein S (alpha)
8085797	5.1e-07	9.1e-09	-6.66622	9.77545	-1.35873	1.35873	THRB	thyroid hormone receptor beta
8045018	2.4e-05	8.1e-07	-5.50239	5.39077	-1.35824	1.35824	PROC	protein C, inactivator of coagulation factors Va and VIIIa
8155442	1.98e-07	3.08e-09	-6.94265	10.8389	-1.35715	1.35715	LOC102724507///LOC100509620///AQP7P1///AQP7	uncharacterized LOC102724507///putative aquaporin-7-like protein 3///aquaporin 7 pseudogene 1///aquaporin 7
8157761	2.79e-09	2.42e-11	8.17313	15.5992	1.35715	1.35715	NEK6	NIMA related kinase 6
8096160	0.000181	9.23e-06	-4.84518	3.03123	-1.3571	1.3571	ARHGAP24	Rho GTPase activating protein 24
8158976	4.42e-12	1.75e-14	-10.0405	22.7047	-1.35678	1.35678	CEL	carboxyl ester lipase
7951397	8.88e-06	2.52e-07	5.80935	6.52714	1.35611	1.35611	CASP1	caspase 1
8173600	0.000119	5.57e-06	-4.98379	3.51913	-1.35521	1.35521	NAP1L2	nucleosome assembly protein 1 like 2
7906757	2.76e-06	6.23e-08	6.17282	7.89366	1.3547	1.3547	FCGR2A	Fc fragment of IgG receptor IIa
8155554	7.22e-08	9.61e-10	-7.23836	11.9811	-1.35434	1.35434	LOC102724507///LOC100509620///AQP7P1///AQP7	uncharacterized LOC102724507///putative aquaporin-7-like protein 3///aquaporin 7 pseudogene 1///aquaporin 7
7958202	3.78e-07	6.5e-09	6.75222	10.1057	1.3538	1.3538	CHST11	carbohydrate (chondroitin 4) sulfotransferase 11
8022817	1.06e-07	1.5e-09	-7.12577	11.5458	-1.35377	1.35377	KLHL14	kelch like family member 14
7906954	0.000867	6.07e-05	-4.31329	1.21846	-1.35307	1.35307	PBX1	PBX homeobox 1
8008784	1.81e-07	2.79e-09	6.96717	10.9335	1.35246	1.35246	PRR11	proline rich 11
7932243	5.13e-08	6.52e-10	-7.33657	12.3611	-1.3518	1.3518	FAM171A1	family with sequence similarity 171 member A1
8098423	2.57e-05	8.85e-07	5.47889	5.30457	1.35107	1.35107	NEIL3	nei like DNA glycosylase 3
7969986	0.000155	7.67e-06	4.8962	3.21012	1.35027	1.35027	TNFSF13B	tumor necrosis factor superfamily member 13b
7993756	0.000101	4.55e-06	-5.03879	3.7143	-1.34766	1.34766	ACSM3	acyl-CoA synthetase medium-chain family member 3
8113790	4.16e-06	1.03e-07	6.04307	7.40356	1.34597	1.34597	2020-03-03	membrane associated ring-CH-type finger 3
8008172	1.34e-06	2.75e-08	-6.38318	8.69281	-1.34575	1.34575	B4GALNT2	beta-1,4-N-acetyl-galactosaminyltransferase 2
8122265	2.5e-07	4.06e-09	6.87227	10.5677	1.34413	1.34413	TNFAIP3	TNF alpha induced protein 3
7937952	0.000495	3.11e-05	4.50527	1.86102	1.34311	1.34311	OR51E1	olfactory receptor family 51 subfamily E member 1
8168531	0.0974	0.0239	2.31711	-4.34611	1.34267	1.34267	GPR174	G protein-coupled receptor 174
7973530	2.14e-05	7.08e-07	-5.53794	5.52143	-1.34201	1.34201	PCK2	phosphoenolpyruvate carboxykinase 2, mitochondrial
7962625	6.29e-11	3.49e-13	-9.25912	19.7643	-1.34179	1.34179	RAPGEF3	Rap guanine nucleotide exchange factor 3
7943530	0.136	0.0377	2.12543	-4.74213	1.3417	1.3417	GRIA4	glutamate ionotropic receptor AMPA type subunit 4
8145317	0.0401	0.00732	2.77612	-3.28504	1.34143	1.34143	ADAMDEC1	ADAM like decysin 1
8136662	0.25	0.0901	-1.72238	-5.47705	-1.34111	1.34111	MGAM	maltase-glucoamylase
7933750	0.103	0.0257	-2.28764	-4.40888	-1.33941	1.33941	SLC16A9	solute carrier family 16 member 9
8007071	3.97e-05	1.5e-06	5.33799	4.79027	1.33907	1.33907	CDC6	cell division cycle 6
8052940	0.00108	7.91e-05	-4.23595	0.96367	-1.33878	1.33878	PAIP2B///VPS36	poly(A) binding protein interacting protein 2B///vacuolar protein sorting 36 homolog
8109629	0.0343	0.00595	2.85137	-3.09679	1.33867	1.33867	FABP6	fatty acid binding protein 6
8161488	1.61e-07	2.43e-09	-7.00284	11.0711	-1.33807	1.33807	LOC102724507///LOC100509620///AQP7P1///AQP7	uncharacterized LOC102724507///putative aquaporin-7-like protein 3///aquaporin 7 pseudogene 1///aquaporin 7
8034873	5.2e-05	2.08e-06	5.25099	4.47502	1.33773	1.33773	ADGRE2	adhesion G protein-coupled receptor E2
8097903	7.74e-05	3.35e-06	5.12228	4.01216	1.33745	1.33745	TLR2	toll like receptor 2
8038695	3.18e-09	2.79e-11	-8.13625	15.4567	-1.33674	1.33674	KLK7	kallikrein related peptidase 7
8112841	1.7e-05	5.37e-07	-5.61088	5.7903	-1.3353	1.3353	HOMER1	homer scaffolding protein 1
7966127	2.97e-05	1.06e-06	5.42987	5.12514	1.33457	1.33457	SELPLG	selectin P ligand
8123920	0.0622	0.0132	2.55424	-3.81713	1.33204	1.33204	ELOVL2	ELOVL fatty acid elongase 2
7948455	1.26e-06	2.55e-08	6.4029	8.76798	1.33201	1.33201	MS4A6A	membrane spanning 4-domains A6A
8101366	0.00187	0.000154	-4.03984	0.32899	-1.32951	1.32951	SCD5	stearoyl-CoA desaturase 5
8079966	1.27e-05	3.85e-07	-5.69877	6.11566	-1.3295	1.3295	SEMA3B	semaphorin 3B
8057898	0.000191	9.81e-06	4.82829	2.97217	1.32734	1.32734	HECW2	HECT, C2 and WW domain containing E3 ubiquitin protein ligase 2
8151457	2.2e-05	7.33e-07	5.52883	5.48791	1.327	1.327	HEY1	hes related family bHLH transcription factor with YRPW motif 1
7953333	0.0425	0.00791	2.74736	-3.35597	1.32528	1.32528	CD27	CD27 molecule
8044882	0.000421	2.56e-05	-4.56018	2.04733	-1.32519	1.32519	EPB41L5	erythrocyte membrane protein band 4.1 like 5
8066117	1.82e-05	5.85e-07	5.58874	5.70856	1.32451	1.32451	SAMHD1	SAM and HD domain containing deoxynucleoside triphosphate triphosphohydrolase 1
8066493	0.193	0.062	-1.90156	-5.16715	-1.32415	1.32415	SLPI	secretory leukocyte peptidase inhibitor
8168691	3.85e-08	4.7e-10	7.41953	12.6822	1.32389	1.32389	DIAPH2	diaphanous related formin 2
7948982	1.33e-06	2.72e-08	-6.38624	8.70447	-1.32338	1.32338	HRASLS2	HRAS like suppressor 2
7951271	0.0167	0.00235	3.17734	-2.23835	1.3226	1.3226	MMP1	matrix metallopeptidase 1
7961083	5.79e-05	2.36e-06	5.21718	4.35303	1.32227	1.32227	CLEC2B	C-type lectin domain family 2 member B
7969050	0.222	0.0762	1.80446	-5.3385	1.32151	1.32151	CYSLTR2	cysteinyl leukotriene receptor 2
8145570	1.98e-05	6.47e-07	5.56209	5.61032	1.32068	1.32068	ESCO2	establishment of sister chromatid cohesion N-acetyltransferase 2
8101031	0.00487	0.000497	-3.68161	-0.78473	-1.32032	1.32032	CDKL2	cyclin dependent kinase like 2
8053366	4.44e-12	1.77e-14	-10.0379	22.6949	-1.32005	1.32005	SUCLG1	succinate-CoA ligase alpha subunit
7936856	0.000709	4.77e-05	4.38237	1.44802	1.31932	1.31932	CHST15	carbohydrate (N-acetylgalactosamine 4-sulfate 6-O) sulfotransferase 15
8094278	2.32e-05	7.81e-07	5.51212	5.42653	1.31902	1.31902	NCAPG	non-SMC condensin I complex subunit G
8095907	0.006	0.00064	-3.60211	-1.02323	-1.31819	1.31819	FRAS1	Fraser extracellular matrix complex subunit 1
8146687	0.0001	4.54e-06	-5.03978	3.71781	-1.3167	1.3167	ADHFE1	alcohol dehydrogenase, iron containing 1
7946142	3.44e-13	1.07e-15	10.785	25.4473	1.31628	1.31628	PRKCDBP	protein kinase C delta binding protein
8149865	0.0043	0.000428	3.72867	-0.64203	1.31532	1.31532	EBF2	early B-cell factor 2
8167603	0.00383	0.00037	-3.77367	-0.5045	-1.31334	1.31334	CLCN5	chloride voltage-gated channel 5
8112668	0.0104	0.00128	-3.37944	-1.67307	-1.31333	1.31333	GCNT4	glucosaminyl (N-acetyl) transferase 4, core 2
8042468	2.46e-11	1.18e-13	9.54034	20.8291	1.31096	1.31096	ANXA4	annexin A4
8050007	0.00608	0.000654	3.5956	-1.0426	1.31069	1.31069	PXDN	peroxidasin
7924058	0.00522	0.00054	-3.65547	-0.86351	-1.30966	1.30966	IRF6	interferon regulatory factor 6
7994769	0.00253	0.000223	3.92874	-0.02297	1.30807	1.30807	CORO1A	coronin 1A
8112428	0.00282	0.000253	3.88991	-0.14462	1.30773	1.30773	CD180	CD180 molecule
7994826	0.00474	0.000482	3.69154	-0.75472	1.30738	1.30738	ITGAL	integrin subunit alpha L
8178199	0.00055	3.52e-05	4.46947	1.74013	1.30618	1.30618	HLA-DQA2///HLA-DQA1	major histocompatibility complex, class II, DQ alpha 2///major histocompatibility complex, class II, DQ alpha 1
8179489	0.00055	3.52e-05	4.46947	1.74013	1.30618	1.30618	HLA-DQA2///HLA-DQA1	major histocompatibility complex, class II, DQ alpha 2///major histocompatibility complex, class II, DQ alpha 1
8012126	0.0888	0.021	-2.36919	-4.23357	-1.30612	1.30612	CLDN7	claudin 7
8033241	0.00567	0.000599	3.62329	-0.96	1.30469	1.30469	CD70	CD70 molecule
8120838	1.26e-05	3.8e-07	5.70227	6.12868	1.30424	1.30424	TTK	TTK protein kinase
8081758	0.000199	1.03e-05	-4.81481	2.92511	-1.30423	1.30423	GRAMD1C	GRAM domain containing 1C
7981142	0.00107	7.8e-05	-4.24025	0.97777	-1.30422	1.30422	CLMN	calmin
8105495	2.47e-13	7.49e-16	-10.8825	25.8017	-1.30395	1.30395	PART1	prostate androgen-regulated transcript 1 (non-protein coding)
8036176	9e-09	9.1e-11	-7.83605	14.2953	-1.30225	1.30225	NPHS1	NPHS1, nephrin
7962226	1.76e-11	8.05e-14	-9.64055	21.2068	-1.29986	1.29986	SYT10	synaptotagmin 10
8161610	0.0356	0.00628	-2.83205	-3.14548	-1.29941	1.29941	TMEM252	transmembrane protein 252
7979658	0.0182	0.00265	-3.13637	-2.34994	-1.29836	1.29836	GPX2	glutathione peroxidase 2
8052872	0.00155	0.000123	4.10587	0.54083	1.29738	1.29738	TGFA	transforming growth factor alpha
8103932	7.38e-06	2.01e-07	5.86812	6.74667	1.29621	1.29621	CENPU	centromere protein U
8132860	5.4e-07	9.74e-09	6.64899	9.70934	1.2945	1.2945	EGFR	epidermal growth factor receptor
7913858	6.75e-09	6.55e-11	-7.91961	14.6188	-1.29343	1.29343	PAQR7	progestin and adipoQ receptor family member 7
8175016	9.94e-05	4.49e-06	5.04294	3.72903	1.29274	1.29274	APLN	apelin
8011826	0.000271	1.49e-05	4.71158	2.56663	1.2922	1.2922	SCIMP	SLP adaptor and CSK interacting membrane protein
8013341	0.0647	0.0139	-2.53377	-3.86447	-1.292	1.292	MFAP4	microfibrillar associated protein 4
8091260	0.00157	0.000125	4.10151	0.52679	1.29041	1.29041	SLC9A9	solute carrier family 9 member A9
8111474	0.094	0.0227	-2.33757	-4.30215	-1.28943	1.28943	AGXT2	alanine--glyoxylate aminotransferase 2
8158671	3.47e-05	1.29e-06	-5.37935	4.94076	-1.2893	1.2893	ASS1	argininosuccinate synthase 1
7933204	6.07e-06	1.6e-07	5.92776	6.97005	1.28925	1.28925	C10orf10	chromosome 10 open reading frame 10
7914342	0.116	0.0304	-2.21685	-4.55686	-1.28902	1.28902	FABP3	fatty acid binding protein 3
7960340	0.000245	1.33e-05	4.7441	2.67918	1.28859	1.28859	FOXM1	forkhead box M1
7940135	0.12	0.0319	-2.19735	-4.59695	-1.28855	1.28855	GLYATL1	glycine-N-acyltransferase like 1
8081488	0.237	0.0836	1.75959	-5.41496	1.28794	1.28794	HHLA2	HERV-H LTR-associating 2
8163116	1.77e-08	1.95e-10	-7.64272	13.5466	-1.28717	1.28717	EPB41L4B	erythrocyte membrane protein band 4.1 like 4B
7965964	3.51e-06	8.26e-08	6.09991	7.61798	1.28659	1.28659	SLC41A2	solute carrier family 41 member 2
8109093	0.00049	3.07e-05	4.50897	1.87354	1.2862	1.2862	ABLIM3	actin binding LIM protein family member 3
8088397	3.48e-05	1.29e-06	-5.3789	4.93912	-1.28591	1.28591	ACOX2	acyl-CoA oxidase 2
8083260	0.0211	0.00318	3.0734	-2.51945	1.28519	1.28519	CPA3	carboxypeptidase A3
7929511	3.02e-06	6.92e-08	6.14545	7.79008	1.28431	1.28431	ENTPD1	ectonucleoside triphosphate diphosphohydrolase 1
8016994	2.04e-07	3.23e-09	-6.92998	10.7901	-1.28418	1.28418	RNF43	ring finger protein 43
7979179	2.53e-05	8.67e-07	5.4843	5.32442	1.28368	1.28368	ERO1A	endoplasmic reticulum oxidoreductase 1 alpha
8044818	1.42e-05	4.35e-07	-5.66684	5.9973	-1.28188	1.28188	CFAP221	cilia and flagella associated protein 221
8146794	0.00225	0.000193	3.97215	0.11388	1.28118	1.28118	PREX2	phosphatidylinositol-3,4,5-trisphosphate dependent Rac exchange factor 2
8016457	3.48e-10	2.33e-12	-8.76993	17.8971	-1.27911	1.27911	HOXB5	homeobox B5
7983393	0.00148	0.000116	-4.12459	0.60123	-1.27869	1.27869	SORD	sorbitol dehydrogenase
8023598	0.00164	0.000132	-4.08561	0.47565	-1.27787	1.27787	RNF152	ring finger protein 152
7972750	0.000509	3.21e-05	4.4961	1.83	1.2771	1.2771	COL4A1	collagen type IV alpha 1 chain
8066431	0.0123	0.00159	3.30706	-1.87828	1.27697	1.27697	ADA	adenosine deaminase
8123951	5.25e-07	9.42e-09	-6.65739	9.74155	-1.27688	1.27688	ADTRP	androgen dependent TFPI regulating protein
7920285	8.8e-09	8.85e-11	-7.84329	14.3233	-1.27614	1.27614	S100A2	S100 calcium binding protein A2
8121749	0.000396	2.38e-05	4.5812	2.11897	1.27581	1.27581	GJA1	gap junction protein alpha 1
8014066	0.000207	1.08e-05	4.80094	2.87675	1.27579	1.27579	EVI2A	ecotropic viral integration site 2A
8053584	0.0541	0.0109	2.6267	-3.64722	1.27523	1.27523	CD8A	CD8a molecule
7903893	0.000114	5.3e-06	4.99747	3.56759	1.27447	1.27447	CD53	CD53 molecule
8132031	4.4e-15	9.11e-18	-12.0985	30.1222	-1.27396	1.27396	PRR15	proline rich 15
8174513	0.08	0.0184	-2.42413	-4.1126	-1.27319	1.27319	CHRDL1	chordin like 1
8042637	1.12e-05	3.32e-07	5.73779	6.26062	1.27316	1.27316	DYSF	dysferlin
8171248	3.42e-06	8.02e-08	6.10729	7.64584	1.27245	1.27245	ANOS1	anosmin 1
8056257	0.0258	0.00413	2.98202	-2.76096	1.27217	1.27217	FAP	fibroblast activation protein alpha
7939738	1.56e-09	1.24e-11	8.34333	16.2563	1.27017	1.27017	DDB2	damage specific DNA binding protein 2
7953878	0.00149	0.000116	4.12329	0.59704	1.26991	1.26991	CLEC2D	C-type lectin domain family 2 member D
8096808	0.000996	7.19e-05	4.26399	1.05578	1.2693	1.2693	MCUB	mitochondrial calcium uniporter dominant negative beta subunit
7934553	2.17e-11	1.02e-13	-9.57922	20.9758	-1.26906	1.26906	ZNF503	zinc finger protein 503
7898357	2.64e-06	5.89e-08	-6.18696	7.94721	-1.269	1.269	LOC102724562///MST1L///MST1P2///MST1	macrophage stimulating 1 pseudogene///macrophage stimulating 1 like///macrophage stimulating 1 pseudogene 2///macrophage stimulating 1
7909350	0.000231	1.23e-05	-4.76443	2.74974	-1.26882	1.26882	CR2	complement component 3d receptor 2
8117476	8.55e-05	3.77e-06	5.09034	3.898	1.26855	1.26855	BTN3A3	butyrophilin subfamily 3 member A3
8121515	0.0389	0.00701	-2.7918	-3.24614	-1.26779	1.26779	SLC16A10	solute carrier family 16 member 10
8061668	0.000358	2.09e-05	4.61775	2.24385	1.26738	1.26738	HCK	HCK proto-oncogene, Src family tyrosine kinase
7929258	7.89e-05	3.43e-06	5.11597	3.98959	1.26706	1.26706	KIF11	kinesin family member 11
7922994	5.49e-06	1.42e-07	-5.95964	7.08972	-1.2667	1.2667	BRINP3	BMP/retinoic acid inducible neural specific 3
7922976	0.0128	0.00168	-3.29022	-1.92558	-1.2663	1.2663	PTGS2	prostaglandin-endoperoxide synthase 2
8102594	0.0624	0.0132	2.55254	-3.82108	1.26576	1.26576	TNIP3	TNFAIP3 interacting protein 3
8123606	0.00111	8.2e-05	4.22551	0.92948	1.26448	1.26448	SERPINB9P1	serpin family B member 9 pseudogene 1
7957260	9.94e-05	4.48e-06	5.04334	3.73047	1.26374	1.26374	GLIPR1	GLI pathogenesis related 1
7970569	2.19e-08	2.47e-10	7.58291	13.3149	1.26302	1.26302	SACS	sacsin molecular chaperone
8040430	0.029	0.00479	-2.92953	-2.89724	-1.26243	1.26243	VSNL1	visinin like 1
7939620	8.06e-06	2.23e-07	-5.84114	6.64582	-1.26223	1.26223	LARGE2	LARGE xylosyl- and glucuronyltransferase 2
7929344	0.00904	0.00107	3.43681	-1.50828	1.26161	1.26161	FFAR4	free fatty acid receptor 4
8046546	1.69e-06	3.56e-08	-6.31654	8.43907	-1.26049	1.26049	HOXD8	homeobox D8
8032588	0.00234	0.000202	-3.95823	0.0699	-1.26033	1.26033	SMIM24	small integral membrane protein 24
8106504	0.0903	0.0216	-2.35921	-4.2553	-1.25874	1.25874	BHMT	betaine--homocysteine S-methyltransferase
8081537	0.0357	0.0063	2.83109	-3.1479	1.25755	1.25755	TRAT1	T cell receptor associated transmembrane adaptor 1
8056518	1.2e-06	2.42e-08	-6.41571	8.81685	-1.25715	1.25715	SCN7A	sodium voltage-gated channel alpha subunit 7
7985829	3.96e-06	9.71e-08	6.05778	7.45899	1.25658	1.25658	FANCI	Fanconi anemia complementation group I
8067233	0.000209	1.1e-05	4.79721	2.86374	1.25568	1.25568	PMEPA1	prostate transmembrane protein, androgen induced 1
8166730	0.000444	2.72e-05	4.54292	1.98866	1.25568	1.25568	CYBB	cytochrome b-245 beta chain
8174527	0.103	0.0257	-2.28737	-4.40945	-1.25566	1.25566	CAPN6	calpain 6
8056363	0.0081	0.000937	-3.48064	-1.38113	-1.25564	1.25564	SLC38A11	solute carrier family 38 member 11
8138489	0.00056	3.6e-05	4.46295	1.71814	1.25547	1.25547	CDCA7L	cell division cycle associated 7 like
8102800	0.00762	0.000868	3.50506	-1.3098	1.2548	1.2548	SLC7A11	solute carrier family 7 member 11
8037005	9.67e-07	1.87e-08	6.48164	9.06855	1.2546	1.2546	TGFB1	transforming growth factor beta 1
7965322	0.00219	0.000185	-3.98381	0.15079	-1.25408	1.25408	KITLG	KIT ligand
7977273	0.0379	0.00679	2.80337	-3.21732	1.25375	1.25375	ADSSL1	adenylosuccinate synthase like 1
8092552	0.000117	5.45e-06	-4.9896	3.5397	-1.25278	1.25278	IGF2BP2	insulin like growth factor 2 mRNA binding protein 2
8089835	0.00119	8.88e-05	4.20228	0.85356	1.25115	1.25115	FSTL1	follistatin like 1
8047300	0.158	0.0464	-2.03406	-4.92057	-1.25102	1.25102	AOX1	aldehyde oxidase 1
7935180	3.92e-11	2.03e-13	9.40021	20.2994	1.24771	1.24771	PDLIM1	PDZ and LIM domain 1
8048205	0.00367	0.00035	-3.79032	-0.45335	-1.24735	1.24735	IGFBP2	insulin like growth factor binding protein 2
8042310	4.47e-10	3.1e-12	8.69678	17.6164	1.24632	1.24632	SLC1A4	solute carrier family 1 member 4
7952335	0.000459	2.83e-05	-4.53153	1.94997	-1.24596	1.24596	SNORD14E	small nucleolar RNA, C/D box 14E
8138745	0.0122	0.00156	-3.3131	-1.86127	-1.24245	1.24245	HOXA7	homeobox A7
8081081	0.00917	0.00109	3.4309	-1.52533	1.23984	1.23984	EPHA3	EPH receptor A3
8111892	0.000348	2.02e-05	-4.62719	2.27619	-1.23984	1.23984	OXCT1	3-oxoacid CoA-transferase 1
8172254	0.000571	3.69e-05	4.45633	1.69586	1.23929	1.23929	CXorf36	chromosome X open reading frame 36
8009493	0.0779	0.0177	-2.43845	-4.08072	-1.23919	1.23919	KCNJ16	potassium voltage-gated channel subfamily J member 16
7953218	2.41e-06	5.32e-08	6.21329	8.04697	1.23897	1.23897	RAD51AP1	RAD51 associated protein 1
8072735	0.0175	0.0025	3.15518	-2.29882	1.23894	1.23894	APOL1	apolipoprotein L1
7975167	9.77e-05	4.39e-06	-5.04871	3.74956	-1.2389	1.2389	GPHN	gephyrin
7906767	1.24e-05	3.72e-07	5.70775	6.14902	1.23817	1.23817	FCGR2C///FCGR2B	Fc fragment of IgG receptor IIc (gene/pseudogene)///Fc fragment of IgG receptor IIb
8017964	0.00317	0.000293	-3.84538	-0.28327	-1.23775	1.23775	ABCA6	ATP binding cassette subfamily A member 6
7953428	0.000119	5.56e-06	4.98417	3.52047	1.23738	1.23738	CD4	CD4 molecule
8021376	0.000177	8.99e-06	-4.85229	3.05612	-1.23698	1.23698	NEDD4L	neural precursor cell expressed, developmentally down-regulated 4-like, E3 ubiquitin protein ligase
8050160	3.17e-06	7.33e-08	-6.13065	7.73412	-1.23514	1.23514	MBOAT2	membrane bound O-acyltransferase domain containing 2
7911796	2.75e-12	1.04e-14	-10.1782	23.2165	-1.23494	1.23494	LINC00982	long intergenic non-protein coding RNA 982
8132843	8.15e-05	3.56e-06	5.10538	3.95173	1.23475	1.23475	HAUS6	HAUS augmin like complex subunit 6
7981943	0.000385	2.29e-05	-4.59168	2.15471	-1.2346	1.2346	SNORD64///PWAR5	small nucleolar RNA, C/D box 64///Prader Willi/Angelman region RNA 5
7954065	0.00413	0.000406	-3.74468	-0.59321	-1.23454	1.23454	GPRC5A	G protein-coupled receptor class C group 5 member A
8166784	0.0339	0.00585	-2.85772	-3.08074	-1.2339	1.2339	TSPAN7	tetraspanin 7
7945204	0.00481	0.00049	-3.68625	-0.7707	-1.2335	1.2335	ST14	suppression of tumorigenicity 14
7942569	4.6e-05	1.78e-06	5.29216	4.62397	1.23336	1.23336	SLCO2B1	solute carrier organic anion transporter family member 2B1
7925525	3.95e-06	9.65e-08	6.05957	7.46574	1.2326	1.2326	CEP170	centrosomal protein 170
7932407	0.252	0.0916	1.71428	-5.4904	1.23157	1.23157	ST8SIA6	ST8 alpha-N-acetyl-neuraminide alpha-2,8-sialyltransferase 6
8036224	6.73e-06	1.8e-07	5.89699	6.85475	1.23129	1.23129	TYROBP	TYRO protein tyrosine kinase binding protein
8064904	7.53e-06	2.06e-07	-5.86269	6.72635	-1.2311	1.2311	FERMT1	fermitin family member 1
8136115	0.0208	0.00311	-3.08099	-2.49914	-1.23069	1.23069	STRIP2	striatin interacting protein 2
8161520	0.000244	1.32e-05	-4.7462	2.68645	-1.23032	1.23032	PGM5P2///PGM5	phosphoglucomutase 5 pseudogene 2///phosphoglucomutase 5
7948420	9.47e-05	4.23e-06	5.05877	3.7854	1.22967	1.22967	FABP5P3///FABP5	fatty acid binding protein 5 pseudogene 3///fatty acid binding protein 5
7934936	0.378	0.168	-1.39393	-5.97213	-1.22957	1.22957	SLC16A12	solute carrier family 16 member 12
8138381	1.91e-05	6.16e-07	-5.57477	5.65705	-1.22905	1.22905	AGR2	anterior gradient 2, protein disulphide isomerase family member
8105481	0.00436	0.000434	3.72431	-0.6553	1.22793	1.22793	GAPT	GRB2-binding adaptor protein, transmembrane
7982358	0.000477	2.97e-05	4.51822	1.90487	1.22585	1.22585	ARHGAP11A	Rho GTPase activating protein 11A
8009929	3.97e-13	1.3e-15	-10.7337	25.2603	-1.22574	1.22574	SMIM5	small integral membrane protein 5
8059413	4.34e-06	1.08e-07	6.02954	7.3526	1.22523	1.22523	DOCK10	dedicator of cytokinesis 10
7924450	1.5e-05	4.61e-07	5.65117	5.93928	1.22471	1.22471	DUSP10	dual specificity phosphatase 10
7905406	3.77e-06	9.15e-08	-6.07337	7.51779	-1.22422	1.22422	CGN	cingulin
7912343	1.43e-09	1.13e-11	-8.36653	16.3457	-1.22338	1.22338	CASZ1	castor zinc finger 1
7904254	3.35e-08	3.99e-10	-7.46095	12.8426	-1.22322	1.22322	ATP1A1	ATPase Na+/K+ transporting subunit alpha 1
8168794	1.11e-05	3.27e-07	5.74118	6.27321	1.22273	1.22273	CENPI	centromere protein I
8124498	0.0672	0.0146	-2.51529	-3.90691	-1.22218	1.22218	ZNF204P	zinc finger protein 204, pseudogene
8101429	0.00385	0.000372	3.77156	-0.51097	1.22182	1.22182	PLAC8	placenta specific 8
7971590	5.17e-05	2.06e-06	-5.25288	4.48185	-1.22145	1.22145	CAB39L	calcium binding protein 39 like
8105585	0.00646	0.000708	-3.57005	-1.11845	-1.22067	1.22067	RNF180	ring finger protein 180
7899101	5.09e-07	9.07e-09	-6.66707	9.7787	-1.22059	1.22059	CNKSR1	connector enhancer of kinase suppressor of Ras 1
7951217	0.215	0.0723	-1.82949	-5.29509	-1.22041	1.22041	MMP7	matrix metallopeptidase 7
7948229	0.00294	0.000266	3.87453	-0.19262	1.22026	1.22026	SLC43A3///PRG2	solute carrier family 43 member 3///proteoglycan 2, pro eosinophil major basic protein
8105340	0.0345	0.00599	2.84897	-3.10286	1.21959	1.21959	GZMA	granzyme A
8146934	0.00353	0.000334	3.80514	-0.40772	1.21853	1.21853	LY96	lymphocyte antigen 96
8108713	0.0266	0.00428	2.96913	-2.79458	1.21846	1.21846	PCDHB8	protocadherin beta 8
8145889	5.81e-05	2.37e-06	5.21532	4.34634	1.21703	1.21703	EIF4EBP1	eukaryotic translation initiation factor 4E binding protein 1
8009844	1.98e-07	3.06e-09	-6.94433	10.8454	-1.21688	1.21688	LLGL2	LLGL2, scribble cell polarity complex component
8106986	0.043	0.00803	-2.74197	-3.36918	-1.21608	1.21608	RHOBTB3	Rho related BTB domain containing 3
7996448	5.92e-09	5.59e-11	7.96003	14.7752	1.21585	1.21585	NOL3	nucleolar protein 3
8148220	8.19e-09	8.16e-11	-7.86373	14.4025	-1.21513	1.21513	FER1L6	fer-1 like family member 6
7976080	0.0093	0.00111	3.42482	-1.54288	1.21511	1.21511	GPR65	G protein-coupled receptor 65
8138824	0.00081	5.59e-05	-4.33682	1.29642	-1.21381	1.21381	SCRN1	secernin 1
8161513	0.00025	1.36e-05	-4.73854	2.65992	-1.21274	1.21274	PGM5P2///PGM5	phosphoglucomutase 5 pseudogene 2///phosphoglucomutase 5
7943369	0.00059	3.84e-05	4.44488	1.65735	1.21245	1.21245	TMEM133	transmembrane protein 133
8014891	0.03	0.00502	2.91289	-2.94006	1.21142	1.21142	IKZF3	IKAROS family zinc finger 3
7926368	6.8e-22	2.25e-25	17.5614	47.1122	1.21121	1.21121	VIM	vimentin
8166059	0.00955	0.00115	3.41438	-1.57292	1.20872	1.20872	TLR7	toll like receptor 7
8116635	0.00131	9.93e-05	-4.16954	0.74692	-1.20755	1.20755	BPHL	biphenyl hydrolase like
8020973	6.52e-06	1.74e-07	-5.9058	6.88773	-1.20751	1.20751	FHOD3	formin homology 2 domain containing 3
8118571	0.000186	9.53e-06	4.83625	2.99997	1.20734	1.20734	PSMB9	proteasome subunit beta 9
8178211	0.000186	9.53e-06	4.83625	2.99997	1.20734	1.20734	PSMB9	proteasome subunit beta 9
8179495	0.000186	9.53e-06	4.83625	2.99997	1.20734	1.20734	PSMB9	proteasome subunit beta 9
7968484	2.61e-09	2.25e-11	8.19097	15.6681	1.20687	1.20687	BRCA2	BRCA2, DNA repair associated
8129695	0.0372	0.00664	-2.81172	-3.19647	-1.20641	1.20641	ALDH8A1	aldehyde dehydrogenase 8 family member A1
8082911	5.23e-09	4.89e-11	7.99399	14.9066	1.20632	1.20632	NCK1	NCK adaptor protein 1
8167027	0.00173	0.00014	-4.06851	0.42075	-1.20615	1.20615	RGN	regucalcin
7966779	3.44e-09	3.07e-11	-8.11248	15.3648	-1.20602	1.20602	NOS1	nitric oxide synthase 1
8101587	8.49e-05	3.74e-06	-5.09269	3.90636	-1.20543	1.20543	MAPK10	mitogen-activated protein kinase 10
8054702	1.65e-05	5.19e-07	5.61994	5.82377	1.20486	1.20486	CKAP2L	cytoskeleton associated protein 2 like
8040238	5.26e-06	1.34e-07	5.97467	7.14615	1.20477	1.20477	HPCAL1	hippocalcin like 1
7928766	0.218	0.074	1.81838	-5.31442	1.20288	1.20288	C10orf99	chromosome 10 open reading frame 99
8110417	0.000913	6.48e-05	4.29426	1.15553	1.20193	1.20193	FAM153C///FAM153A///FAM153B	family with sequence similarity 153, member C///family with sequence similarity 153 member A///family with sequence similarity 153 member B
8136557	3.07e-07	5.14e-09	6.81224	10.3366	1.20155	1.20155	TBXAS1	thromboxane A synthase 1
8057578	0.000867	6.07e-05	4.31326	1.21834	1.20148	1.20148	CALCRL	calcitonin receptor like receptor
8025601	6.16e-05	2.55e-06	5.1955	4.27496	1.20136	1.20136	ICAM1	intercellular adhesion molecule 1
8174103	0.000628	4.12e-05	-4.42446	1.58882	-1.20077	1.20077	GK3P///GK	glycerol kinase 3 pseudogene///glycerol kinase
8042701	7.82e-14	2.11e-16	-11.2265	27.0427	-1.19972	1.19972	EMX1	empty spiracles homeobox 1
7976523	3.16e-07	5.31e-09	-6.80389	10.3044	-1.19903	1.19903	TCL6	T-cell leukemia/lymphoma 6 (non-protein coding)
8043100	1.7e-12	6.18e-15	10.3168	23.7295	1.19747	1.19747	TMSB10	thymosin beta 10
8102643	0.000308	1.73e-05	4.67025	2.42407	1.19688	1.19688	CCNA2	cyclin A2
8108744	0.000662	4.41e-05	4.40497	1.52354	1.19661	1.19661	PCDHB14	protocadherin beta 14
8055702	6.26e-07	1.16e-08	6.60385	9.53626	1.19592	1.19592	NMI	N-myc and STAT interactor
8136940	1.48e-10	9.04e-13	9.01357	18.8292	1.19585	1.19585	TCAF2P1///TCAF2	TRPM8 channel associated factor 2 pseudogene 1///TRPM8 channel associated factor 2
8013450	0.000207	1.08e-05	4.80073	2.87601	1.19545	1.19545	LGALS9C///LGALS9B///LGALS9	galectin 9C///galectin 9B///galectin 9
8035201	3.22e-11	1.64e-13	-9.45604	20.5106	-1.19542	1.19542	CPAMD8	C3 and PZP like, alpha-2-macroglobulin domain containing 8
8171359	0.000109	5.02e-06	-5.0123	3.62018	-1.19538	1.19538	GPM6B	glycoprotein M6B
7955348	0.0553	0.0112	-2.61569	-3.67329	-1.19538	1.19538	GPD1	glycerol-3-phosphate dehydrogenase 1
7901691	4.98e-15	1.06e-17	-12.0556	29.973	-1.19525	1.19525	BSND	barttin CLCNK type accessory beta subunit
8090591	4.93e-05	1.93e-06	5.27063	4.54603	1.19368	1.19368	PLXND1	plexin D1
7950409	0.000309	1.74e-05	4.66909	2.4201	1.19295	1.19295	KCNE3	potassium voltage-gated channel subfamily E regulatory subunit 3
8019857	2.55e-06	5.68e-08	6.19662	7.98378	1.19132	1.19132	NDC80	NDC80, kinetochore complex component
7966268	1.48e-07	2.21e-09	7.02727	11.1654	1.19113	1.19113	GIT2	GIT ArfGAP 2
7961595	0.00905	0.00107	-3.43639	-1.50949	-1.19052	1.19052	RERGL	RERG like
7909027	0.000766	5.23e-05	-4.35602	1.36024	-1.18934	1.18934	NFASC	neurofascin
7903461	5.28e-08	6.77e-10	-7.32722	12.3249	-1.18902	1.18902	NTNG1	netrin G1
8161774	1.4e-07	2.06e-09	-7.0443	11.2311	-1.18766	1.18766	TRPM6	transient receptor potential cation channel subfamily M member 6
8142232	5.3e-08	6.83e-10	-7.32475	12.3153	-1.18689	1.18689	LAMB4	laminin subunit beta 4
8166335	2.73e-07	4.47e-09	-6.84777	10.4733	-1.18646	1.18646	PDHA1	pyruvate dehydrogenase (lipoamide) alpha 1
8155214	8.44e-05	3.7e-06	5.09505	3.91479	1.18617	1.18617	MELK	maternal embryonic leucine zipper kinase
8122099	0.0272	0.00442	-2.95795	-2.82367	-1.18538	1.18538	ENPP1	ectonucleotide pyrophosphatase/phosphodiesterase 1
8173647	0.000254	1.38e-05	-4.73289	2.64033	-1.1848	1.1848	ZDHHC15	zinc finger DHHC-type containing 15
8163348	9.64e-11	5.71e-13	-9.13236	19.2822	-1.18421	1.18421	C9orf84	chromosome 9 open reading frame 84
7957570	0.000173	8.72e-06	4.86069	3.08553	1.18402	1.18402	PLXNC1	plexin C1
7906377	0.000624	4.09e-05	4.4268	1.59667	1.1839	1.1839	MNDA	myeloid cell nuclear differentiation antigen
8089729	1.56e-08	1.69e-10	-7.67941	13.6887	-1.18305	1.18305	IGSF11	immunoglobulin superfamily member 11
8132819	0.00345	0.000325	3.81299	-0.38349	1.18184	1.18184	IKZF1	IKAROS family zinc finger 1
8121838	0.00169	0.000136	-4.07562	0.44354	-1.18123	1.18123	TPD52L1	tumor protein D52-like 1
7923753	0.000385	2.3e-05	-4.59073	2.15147	-1.18031	1.18031	NUAK2	NUAK family kinase 2
7999965	0.203	0.0663	-1.87057	-5.2227	-1.17992	1.17992	ACSM2B///ACSM2A	acyl-CoA synthetase medium-chain family member 2B///acyl-CoA synthetase medium-chain family member 2A
8000716	0.00222	0.000189	3.97784	0.13189	1.17991	1.17991	SEZ6L2	seizure related 6 homolog like 2
8026806	2.54e-10	1.64e-12	8.86038	18.2436	1.17798	1.17798	COLGALT1	collagen beta(1-O)galactosyltransferase 1
8161701	2.93e-05	1.04e-06	5.43536	5.14521	1.1774	1.1774	TMEM2	transmembrane protein 2
7993737	0.213	0.0714	-1.83548	-5.28462	-1.17723	1.17723	ACSM2B///ACSM2A	acyl-CoA synthetase medium-chain family member 2B///acyl-CoA synthetase medium-chain family member 2A
8074856	0.0415	0.00766	2.75943	-3.32626	1.17715	1.17715	PRAME	preferentially expressed antigen in melanoma
7989073	1.2e-05	3.59e-07	-5.7167	6.18223	-1.17711	1.17711	PRTG	protogenin
8092970	0.124	0.0331	-2.18081	-4.6307	-1.17703	1.17703	APOD	apolipoprotein D
7904287	0.0387	0.00698	2.79329	-3.24244	1.17601	1.17601	CD2	CD2 molecule
8102076	5.87e-05	2.41e-06	5.21166	4.33315	1.1751	1.1751	CENPE	centromere protein E
8037205	0.0216	0.00327	-3.06299	-2.54723	-1.17465	1.17465	CEACAM1	carcinoembryonic antigen related cell adhesion molecule 1
7990757	0.000145	7.09e-06	-4.91784	3.28626	-1.1743	1.1743	CTSH	cathepsin H
7925751	0.0786	0.0179	-2.43444	-4.08965	-1.17417	1.17417	OR2T10	olfactory receptor family 2 subfamily T member 10
7909214	8.68e-06	2.46e-07	5.81611	6.55236	1.17408	1.17408	RASSF5	Ras association domain family member 5
7995797	0.0176	0.00253	-3.15191	-2.30773	-1.1739	1.1739	MT1E	metallothionein 1E
7985873	8.16e-06	2.28e-07	5.8356	6.62511	1.17365	1.17365	TICRR	TOPBP1 interacting checkpoint and replication regulator
8157949	4.73e-10	3.34e-12	-8.67843	17.546	-1.17286	1.17286	RALGPS1	Ral GEF with PH domain and SH3 binding motif 1
7921667	0.0122	0.00157	3.3114	-1.86608	1.17258	1.17258	CD48	CD48 molecule
7994109	0.000371	2.17e-05	4.60618	2.20426	1.17203	1.17203	PLK1	polo like kinase 1
8077366	0.00132	9.99e-05	-4.16775	0.74108	-1.17175	1.17175	LRRN1	leucine rich repeat neuronal 1
7974404	0.00164	0.000131	4.08672	0.47919	1.17146	1.17146	CDKN3	cyclin dependent kinase inhibitor 3
7973101	0.000105	4.8e-06	5.02457	3.66373	1.17111	1.17111	RNASE6	ribonuclease A family member k6
8109528	0.00775	0.000885	-3.49901	-1.32751	-1.17108	1.17108	CYFIP2	cytoplasmic FMR1 interacting protein 2
8050427	2.34e-05	7.89e-07	5.50924	5.41593	1.17093	1.17093	FAM49A	family with sequence similarity 49 member A
8154367	4.42e-05	1.69e-06	-5.30589	4.67375	-1.17006	1.17006	TYRP1	tyrosinase related protein 1
8177964	0.00449	0.000451	-3.71214	-0.69228	-1.16982	1.16982	MCCD1	mitochondrial coiled-coil domain 1
8179246	0.00449	0.000451	-3.71214	-0.69228	-1.16982	1.16982	MCCD1	mitochondrial coiled-coil domain 1
8101659	0.00737	0.000834	3.51786	-1.27231	1.1698	1.1698	SPARCL1	SPARC like 1
7997453	4.09e-08	5.04e-10	-7.40205	12.6145	-1.16948	1.16948	PLCG2	phospholipase C gamma 2
8084002	2.98e-07	4.93e-09	-6.82245	10.3759	-1.16943	1.16943	KCNMB2	potassium calcium-activated channel subfamily M regulatory beta subunit 2
8067932	0.000992	7.15e-05	-4.26574	1.06151	-1.16915	1.16915	MIR99AHG	mir-99a-let-7c cluster host gene
7898677	1.89e-06	4.04e-08	-6.28429	8.31646	-1.16884	1.16884	HS6ST1	heparan sulfate 6-O-sulfotransferase 1
8086201	6.29e-11	3.45e-13	-9.26204	19.7754	-1.16879	1.16879	ACAA1	acetyl-CoA acyltransferase 1
8086961	3.19e-07	5.39e-09	6.79979	10.2887	1.16789	1.16789	PFKFB4	6-phosphofructo-2-kinase/fructose-2,6-biphosphatase 4
7944152	0.00104	7.6e-05	4.2478	1.00256	1.16683	1.16683	IL10RA	interleukin 10 receptor subunit alpha
8132439	0.0137	0.00183	-3.26082	-2.00777	-1.16611	1.16611	SUGCT	succinyl-CoA:glutarate-CoA transferase
8094743	0.00236	0.000203	3.95621	0.06353	1.1658	1.1658	RHOH	ras homolog family member H
7961693	2.51e-07	4.07e-09	-6.87136	10.5642	-1.16537	1.16537	LDHB	lactate dehydrogenase B
7922229	0.00636	0.000692	-3.57722	-1.0972	-1.16471	1.16471	SELE	selectin E
8171725	0.211	0.0706	1.84038	-5.27603	1.16434	1.16434	MAP7D2	MAP7 domain containing 2
8112980	0.0636	0.0136	2.54255	-3.84421	1.16391	1.16391	EDIL3	EGF like repeats and discoidin domains 3
7915435	1.26e-09	9.81e-12	-8.40281	16.4856	-1.16254	1.16254	CLDN19	claudin 19
8030277	0.000212	1.11e-05	4.79301	2.84911	1.16119	1.16119	CD37	CD37 molecule
8038577	1.98e-05	6.47e-07	-5.5618	5.60927	-1.16093	1.16093	ASPDH	aspartate dehydrogenase domain containing
8049246	3.27e-05	1.2e-06	5.39844	5.01037	1.15967	1.15967	INPP5D	inositol polyphosphate-5-phosphatase D
8110183	0.0932	0.0225	-2.3426	-4.29129	-1.15887	1.15887	CDHR2	cadherin related family member 2
7956229	0.149	0.0426	-2.07153	-4.84821	-1.15883	1.15883	SLC39A5	solute carrier family 39 member 5
7944179	0.0428	0.00799	2.7439	-3.36446	1.15865	1.15865	CD3E	CD3e molecule
7964535	3.16e-10	2.09e-12	-8.79791	18.0043	-1.15809	1.15809	CYP27B1	cytochrome P450 family 27 subfamily B member 1
8071185	0.000565	3.64e-05	4.45981	1.70758	1.15795	1.15795	DGCR5	DiGeorge syndrome critical region gene 5 (non-protein coding)
8144758	0.00174	0.000141	-4.0653	0.41046	-1.15701	1.15701	ZDHHC2	zinc finger DHHC-type containing 2
8083978	0.000164	8.21e-06	-4.8774	3.14411	-1.15637	1.15637	NAALADL2	N-acetylated alpha-linked acidic dipeptidase-like 2
8095751	0.0112	0.0014	-3.34858	-1.76094	-1.15528	1.15528	PARM1	prostate androgen-regulated mucin-like protein 1
7919028	0.0751	0.0169	2.45793	-4.03706	1.15498	1.15498	TBX15	T-box 15
7968789	0.000156	7.77e-06	4.89247	3.19703	1.15455	1.15455	RGCC	regulator of cell cycle
8150881	1.95e-12	7.21e-15	-10.2759	23.5785	-1.15422	1.15422	PLAG1	PLAG1 zinc finger
8097910	0.602	0.367	0.909543	-6.52129	1.1534	1.1534	FGB	fibrinogen beta chain
7960865	0.00181	0.000148	4.05159	0.36657	1.15302	1.15302	SLC2A3	solute carrier family 2 member 3
8152988	0.00101	7.3e-05	4.25932	1.04041	1.15243	1.15243	SLA	Src-like-adaptor
7957023	0.00332	0.00031	3.82758	-0.33842	1.15207	1.15207	LYZ	lysozyme
8091757	5.46e-06	1.4e-07	5.96338	7.10375	1.152	1.152	TRIM59	tripartite motif containing 59
8127534	7.81e-07	1.49e-08	6.54089	9.29511	1.15183	1.15183	MB21D1	Mab-21 domain containing 1
8174051	4.95e-05	1.94e-06	5.269	4.54013	1.15155	1.15155	BTK	Bruton tyrosine kinase
8173287	0.00221	0.000188	3.98	0.13872	1.15099	1.15099	VSIG4	V-set and immunoglobulin domain containing 4
8166632	0.000688	4.61e-05	-4.3926	1.48217	-1.15032	1.15032	GK3P///GK	glycerol kinase 3 pseudogene///glycerol kinase
8143663	1.53e-07	2.3e-09	7.01677	11.1248	1.15028	1.15028	EZH2	enhancer of zeste 2 polycomb repressive complex 2 subunit
8089970	2.71e-07	4.42e-09	-6.85027	10.483	-1.14987	1.14987	ILDR1	immunoglobulin like domain containing receptor 1
8036591	0.283	0.108	1.63161	-5.62345	1.14985	1.14985	LGALS4	galectin 4
7915500	0.0143	0.00192	-3.24481	-2.05233	-1.14971	1.14971	C1orf210	chromosome 1 open reading frame 210
7952986	0.000129	6.14e-06	-4.95707	3.42463	-1.14949	1.14949	WNK1	WNK lysine deficient protein kinase 1
7991406	9.56e-06	2.74e-07	5.78812	6.44798	1.14906	1.14906	PRC1	protein regulator of cytokinesis 1
7930857	0.0408	0.00747	-2.76885	-3.30303	-1.14885	1.14885	EMX2	empty spiracles homeobox 2
8136954	8.24e-10	6.16e-12	8.52137	16.9422	1.14862	1.14862	TCAF2P1///TCAF2	TRPM8 channel associated factor 2 pseudogene 1///TRPM8 channel associated factor 2
8163908	0.00012	5.63e-06	4.9808	3.50853	1.1485	1.1485	GGTA1P	glycoprotein, alpha-galactosyltransferase 1 pseudogene
7934920	2.29e-07	3.69e-09	6.89669	10.6618	1.14687	1.14687	LIPA	lipase A, lysosomal acid type
7951545	0.0304	0.0051	-2.90709	-2.95494	-1.14626	1.14626	EXPH5	exophilin 5
8161558	7.96e-08	1.08e-09	-7.20963	11.87	-1.14624	1.14624	LOC102724507///LOC100509620///AQP7P1///AQP7	uncharacterized LOC102724507///putative aquaporin-7-like protein 3///aquaporin 7 pseudogene 1///aquaporin 7
8002218	3.42e-06	8.02e-08	-6.10749	7.64661	-1.14589	1.14589	ESRP2	epithelial splicing regulatory protein 2
8146921	2.58e-05	8.91e-07	-5.47715	5.2982	-1.14585	1.14585	RDH10	retinol dehydrogenase 10 (all-trans)
8108720	0.00103	7.47e-05	4.25281	1.019	1.14534	1.14534	PCDHB9	protocadherin beta 9
7946306	5.05e-10	3.64e-12	-8.65579	17.4591	-1.14484	1.14484	OVCH2	ovochymase 2 (gene/pseudogene)
7921916	0.0163	0.00227	3.18779	-2.20971	1.14377	1.14377	RGS5	regulator of G-protein signaling 5
7985493	0.000513	3.24e-05	4.49316	1.82007	1.1432	1.1432	TM6SF1	transmembrane 6 superfamily member 1
8131957	3.73e-08	4.48e-10	7.43205	12.7307	1.14307	1.14307	SNX10	sorting nexin 10
7906386	0.0202	0.00301	3.09207	-2.46945	1.14239	1.14239	PYHIN1	pyrin and HIN domain family member 1
8163202	0.112	0.029	-2.23672	-4.51572	-1.14147	1.14147	SVEP1///SVEP1	sushi, von Willebrand factor type A, EGF and pentraxin domain containing 1///sushi, von Willebrand factor type A, EGF and pentraxin domain containing 1
8033605	6.26e-05	2.6e-06	5.19073	4.25778	1.1397	1.1397	MYO1F	myosin IF
8089372	8.79e-06	2.49e-07	5.81276	6.53985	1.13939	1.13939	KIAA1524	KIAA1524
7923942	0.00724	0.000816	-3.52473	-1.25214	-1.13932	1.13932	FCAMR	Fc fragment of IgA and IgM receptor
7971653	0.000974	6.98e-05	4.27233	1.08322	1.13917	1.13917	DLEU2	deleted in lymphocytic leukemia 2 (non-protein coding)
8147049	0.000209	1.1e-05	4.79693	2.86277	1.13911	1.13911	FABP5P3///FABP5	fatty acid binding protein 5 pseudogene 3///fatty acid binding protein 5
8110106	0.0156	0.00216	3.2048	-2.16297	1.13869	1.13869	HRH2	histamine receptor H2
8093872	0.0064	0.000699	3.57416	-1.10628	1.13743	1.13743	LINC01587	long intergenic non-protein coding RNA 1587
8174937	0.00618	0.000666	3.58942	-1.06099	1.13587	1.13587	TENM1	teneurin transmembrane protein 1
8100362	1.54e-06	3.21e-08	-6.34376	8.54266	-1.13514	1.13514	LNX1	ligand of numb-protein X 1
8054611	1.14e-05	3.39e-07	5.73238	6.24051	1.13503	1.13503	MIR4435-2HG///LINC00152	MIR4435-2 host gene///long intergenic non-protein coding RNA 152
8073062	0.000898	6.33e-05	4.30094	1.17759	1.13339	1.13339	APOBEC3B	apolipoprotein B mRNA editing enzyme catalytic subunit 3B
8073682	0.000795	5.46e-05	4.34354	1.31875	1.13275	1.13275	PARVG	parvin gamma
8046536	0.0417	0.0077	-2.75722	-3.3317	-1.13271	1.13271	HOXD10	homeobox D10
8066848	5.88e-06	1.54e-07	5.93784	7.00788	1.13186	1.13186	PREX1	phosphatidylinositol-3,4,5-trisphosphate dependent Rac exchange factor 1
7943562	2.07e-08	2.33e-10	-7.59794	13.3731	-1.13089	1.13089	ELMOD1	ELMO domain containing 1
7914000	9.89e-06	2.86e-07	-5.77633	6.40404	-1.13044	1.13044	NR0B2	nuclear receptor subfamily 0 group B member 2
8031223	1.72e-05	5.46e-07	5.60692	5.77568	1.13026	1.13026	LILRB1	leukocyte immunoglobulin like receptor B1
8079931	1.02e-09	7.79e-12	-8.4614	16.7113	-1.12944	1.12944	SLC38A3	solute carrier family 38 member 3
7928395	1.6e-09	1.3e-11	8.33149	16.2106	1.12783	1.12783	FUT11	fucosyltransferase 11
8068761	6.41e-05	2.68e-06	5.18286	4.22948	1.12783	1.12783	ABCG1	ATP binding cassette subfamily G member 1
8136388	3.19e-06	7.38e-08	6.12903	7.72798	1.12616	1.12616	TMEM140	transmembrane protein 140
8006906	0.000715	4.82e-05	-4.37964	1.43892	-1.12592	1.12592	ERBB2	erb-b2 receptor tyrosine kinase 2
8046906	0.0209	0.00314	-3.07698	-2.50987	-1.12475	1.12475	GULP1	GULP, engulfment adaptor PTB domain containing 1
8143209	6.33e-09	6.08e-11	-7.93857	14.6921	-1.12475	1.12475	SVOPL	SVOP like
8106448	0.0432	0.00807	-2.74	-3.37401	-1.12265	1.12265	PDE8B	phosphodiesterase 8B
8080578	0.000974	6.98e-05	-4.27269	1.08441	-1.12234	1.12234	CACNA2D3	calcium voltage-gated channel auxiliary subunit alpha2delta 3
7913896	1.6e-09	1.29e-11	-8.33375	16.2193	-1.12173	1.12173	SLC30A2	solute carrier family 30 member 2
8088142	0.00712	0.0008	-3.53118	-1.23318	-1.12049	1.12049	CHDH	choline dehydrogenase
7944275	4.29e-05	1.64e-06	-5.31532	4.70794	-1.11975	1.11975	TMEM25	transmembrane protein 25
7925755	0.016	0.00223	-3.19383	-2.19314	-1.11971	1.11971	OR2T11	olfactory receptor family 2 subfamily T member 11 (gene/pseudogene)
8149955	0.000247	1.34e-05	4.74205	2.67208	1.11939	1.11939	PBK	PDZ binding kinase
8012247	1.44e-05	4.43e-07	-5.66194	5.97914	-1.11809	1.11809	SAT2	spermidine/spermine N1-acetyltransferase family member 2
8038326	1.13e-06	2.24e-08	-6.43595	8.89408	-1.11775	1.11775	SLC6A16	solute carrier family 6 member 16
7917954	0.0313	0.0053	2.8933	-2.99023	1.1176	1.1176	FRRS1	ferric chelate reductase 1
7932326	0.351	0.15	-1.45684	-5.88479	-1.11687	1.11687	CUBN	cubilin
8150036	4.82e-06	1.21e-07	-6.00094	7.24494	-1.11613	1.11613	KIF13B	kinesin family member 13B
8098870	0.0306	0.00515	2.90325	-2.96477	1.11606	1.11606	SPON2	spondin 2
8160284	1.57e-05	4.9e-07	5.63521	5.88023	1.11503	1.11503	HAUS6	HAUS augmin like complex subunit 6
7941401	0.000121	5.7e-06	-4.97766	3.49742	-1.11502	1.11502	OVOL1	ovo like transcriptional repressor 1
7961532	8.53e-07	1.63e-08	6.51675	9.20279	1.11502	1.11502	ARHGDIB	Rho GDP dissociation inhibitor beta
8006214	1.66e-05	5.23e-07	5.61797	5.8165	1.11492	1.11492	ADAP2	ArfGAP with dual PH domains 2
7994609	0.00529	0.000551	-3.64944	-0.88164	-1.11447	1.11447	QPRT	quinolinate phosphoribosyltransferase
7922152	1.35e-10	8.16e-13	-9.04011	18.9305	-1.11404	1.11404	CCDC181	coiled-coil domain containing 181
7953943	3.33e-08	3.95e-10	-7.4639	12.854	-1.11276	1.11276	GABARAPL1	GABA type A receptor associated protein like 1
8084232	6.69e-12	2.73e-14	9.92374	22.2691	1.11261	1.11261	YEATS2	YEATS domain containing 2
8024900	7.68e-05	3.32e-06	5.12504	4.02203	1.1119	1.1119	UHRF1	ubiquitin like with PHD and ring finger domains 1
7966621	1.72e-05	5.46e-07	5.60672	5.77491	1.11187	1.11187	SDS	serine dehydratase
8102831	0.247	0.089	1.7288	-5.46641	1.11178	1.11178	MGARP	mitochondria localized glutamic acid rich protein
8081890	0.00586	0.000623	3.61068	-0.99767	1.111	1.111	PLA1A	phospholipase A1 member A
8048749	0.0218	0.00332	3.05856	-2.55903	1.11051	1.11051	KCNE4	potassium voltage-gated channel subfamily E regulatory subunit 4
7904106	0.00102	7.41e-05	-4.25498	1.02616	-1.1104	1.1104	MAGI3	membrane associated guanylate kinase, WW and PDZ domain containing 3
8079117	5.12e-07	9.15e-09	-6.66481	9.77004	-1.11002	1.11002	ACKR2	atypical chemokine receptor 2
7935270	0.0018	0.000147	-4.05251	0.36951	-1.10914	1.10914	BLNK	B-cell linker
8163149	0.000121	5.67e-06	-4.9788	3.50145	-1.10878	1.10878	PTPN3	protein tyrosine phosphatase, non-receptor type 3
8115814	0.00262	0.000232	3.91601	-0.06293	1.10873	1.10873	SH3PXD2B	SH3 and PX domains 2B
8050993	0.0113	0.00142	3.34531	-1.77021	1.10781	1.10781	CIB4	calcium and integrin binding family member 4
8085164	3.95e-09	3.59e-11	-8.07273	15.2111	-1.107	1.107	SRGAP3///RAF1	SLIT-ROBO Rho GTPase activating protein 3///Raf-1 proto-oncogene, serine/threonine kinase
8055130	1.43e-06	2.96e-08	-6.36416	8.62035	-1.10699	1.10699	HS6ST1	heparan sulfate 6-O-sulfotransferase 1
8087611	5.06e-05	2e-06	-5.26082	4.51054	-1.10651	1.10651	HYAL1	hyaluronoglucosaminidase 1
8115464	0.0248	0.00391	3.00085	-2.71161	1.1062	1.1062	HAVCR2	hepatitis A virus cellular receptor 2
8037103	6.67e-09	6.45e-11	-7.92346	14.6336	-1.10585	1.10585	GRIK5	glutamate ionotropic receptor kainate type subunit 5
8072876	8.8e-09	8.86e-11	7.84304	14.3223	1.10393	1.10393	LGALS1	galectin 1
8092392	0.000148	7.3e-06	4.90975	3.25777	1.10319	1.10319	KLHL6	kelch like family member 6
8091991	2.02e-09	1.7e-11	-8.26242	15.944	-1.10267	1.10267	MECOM	MDS1 and EVI1 complex locus
8014257	0.00019	9.77e-06	4.82949	2.97637	1.10098	1.10098	SLFN12L	schlafen family member 12 like
8090314	0.0862	0.0203	-2.38478	-4.19949	-1.10037	1.10037	ALDH1L1	aldehyde dehydrogenase 1 family member L1
8034772	0.000105	4.77e-06	5.02634	3.67003	1.09966	1.09966	ASF1B	anti-silencing function 1B histone chaperone
8072926	1.99e-06	4.27e-08	-6.26992	8.26189	-1.09842	1.09842	H1F0	H1 histone family member 0
8120719	0.00428	0.000424	3.73157	-0.63319	1.09797	1.09797	CD109	CD109 molecule
8123609	3.75e-08	4.55e-10	7.42798	12.7149	1.0979	1.0979	SERPINB9	serpin family B member 9
8104901	0.0617	0.0131	2.55818	-3.80801	1.09771	1.09771	IL7R	interleukin 7 receptor
8075910	0.00299	0.000271	3.86862	-0.21103	1.09711	1.09711	RAC2	ras-related C3 botulinum toxin substrate 2 (rho family, small GTP binding protein Rac2)
8171136	0.000374	2.2e-05	4.60278	2.19266	1.09706	1.09706	P2RY8	purinergic receptor P2Y8
8177026	0.000374	2.2e-05	4.60278	2.19266	1.09706	1.09706	P2RY8	purinergic receptor P2Y8
8155673	1.05e-05	3.07e-07	-5.75829	6.33688	-1.09704	1.09704	PIP5K1B	phosphatidylinositol-4-phosphate 5-kinase type 1 beta
8156783	0.0026	0.00023	3.91906	-0.05336	1.09656	1.09656	COL15A1	collagen type XV alpha 1 chain
7985016	5.08e-05	2.01e-06	5.2596	4.50613	1.09607	1.09607	SNX33	sorting nexin 33
7930341	0.255	0.0932	1.70571	-5.50447	1.09403	1.09403	SORCS3	sortilin related VPS10 domain containing receptor 3
8129410	0.0566	0.0116	2.60246	-3.70448	1.09303	1.09303	THEMIS	thymocyte selection associated
8090715	0.0103	0.00127	3.38091	-1.66887	1.09289	1.09289	NPHP3-ACAD11///ACAD11	NPHP3-ACAD11 readthrough (NMD candidate)///acyl-CoA dehydrogenase family member 11
8057418	0.00722	0.000814	-3.52578	-1.24906	-1.09277	1.09277	ZNF385B	zinc finger protein 385B
8054846	2.14e-05	7.09e-07	-5.53766	5.5204	-1.09266	1.09266	SCTR	secretin receptor
7960850	5.23e-05	2.09e-06	5.24889	4.46746	1.0925	1.0925	SLC2A14	solute carrier family 2 member 14
8137250	0.00462	0.000467	3.7014	-0.72486	1.09104	1.09104	GIMAP2	GTPase, IMAP family member 2
8067185	2.98e-09	2.6e-11	-8.15413	15.5258	-1.09101	1.09101	BMP7	bone morphogenetic protein 7
7983306	2.04e-07	3.25e-09	6.92884	10.7857	1.09061	1.09061	WDR76	WD repeat domain 76
8171472	0.392	0.179	-1.35977	-6.01804	-1.08881	1.08881	TMEM27	transmembrane protein 27
8013671	0.0109	0.00136	-3.35939	-1.73021	-1.08865	1.08865	SPAG5	sperm associated antigen 5
7906930	0.000133	6.37e-06	4.94733	3.39022	1.0882	1.0882	NUF2	NUF2, NDC80 kinetochore complex component
7985786	0.00622	0.000671	3.58722	-1.06752	1.08667	1.08667	ACAN	aggrecan
8087691	4.33e-15	8.85e-18	-12.1067	30.1504	-1.08653	1.08653	CACNA2D2	calcium voltage-gated channel auxiliary subunit alpha2delta 2
8016444	9.02e-06	2.57e-07	-5.80442	6.50875	-1.08623	1.08623	HOXB3	homeobox B3
8125463	0.00237	0.000205	3.95394	0.05636	1.08601	1.08601	HLA-DQB2///HLA-DQB1	major histocompatibility complex, class II, DQ beta 2///major histocompatibility complex, class II, DQ beta 1
7918323	0.00153	0.000121	-4.11114	0.55784	-1.08416	1.08416	SORT1	sortilin 1
7947363	0.000416	2.52e-05	-4.56472	2.06279	-1.08389	1.08389	WT1	Wilms tumor 1
8109507	0.0437	0.00819	2.73454	-3.38739	1.08333	1.08333	ITK	IL2 inducible T-cell kinase
8073775	0.055	0.0112	-2.61826	-3.6672	-1.08258	1.08258	FBLN1	fibulin 1
8035297	0.000436	2.67e-05	4.54841	2.00731	1.08155	1.08155	PLVAP	plasmalemma vesicle associated protein
7961166	0.0441	0.00827	2.73108	-3.39585	1.08149	1.08149	KLRC4-KLRK1///KLRC4	KLRC4-KLRK1 readthrough///killer cell lectin like receptor C4
8038809	0.0466	0.00893	2.70245	-3.46556	1.08107	1.08107	NKG7	natural killer cell granule protein 7
8082886	1.98e-08	2.21e-10	-7.61086	13.4232	-1.08074	1.08074	PCCB	propionyl-CoA carboxylase beta subunit
8037363	3.14e-11	1.58e-13	-9.46433	20.542	-1.08042	1.08042	CADM4	cell adhesion molecule 4
8151684	0.0435	0.00813	2.73722	-3.38084	1.08022	1.08022	MMP16	matrix metallopeptidase 16
8083709	8.14e-08	1.11e-09	7.20231	11.8417	1.08005	1.08005	SMC4	structural maintenance of chromosomes 4
7934161	0.0108	0.00134	3.36405	-1.71694	1.07881	1.07881	PRF1	perforin 1
8180257	1.76e-07	2.68e-09	6.97733	10.9727	1.0782	1.0782	CEP170	centrosomal protein 170
8022674	1.43e-07	2.13e-09	7.03648	11.2009	1.07816	1.07816	CDH2	cadherin 2
8105153	0.000149	7.33e-06	-4.90864	3.25387	-1.0772	1.0772	NNT	nicotinamide nucleotide transhydrogenase
7933982	0.0347	0.00605	-2.84558	-3.11141	-1.07696	1.07696	PBLD	phenazine biosynthesis like protein domain containing
7927710	0.00179	0.000147	4.05427	0.37514	1.07685	1.07685	CDK1	cyclin dependent kinase 1
8106827	1.42e-10	8.6e-13	-9.02643	18.8783	-1.07629	1.07629	ADGRV1	adhesion G protein-coupled receptor V1
7907286	0.29	0.113	-1.61009	-5.65711	-1.07474	1.07474	FMO1	flavin containing monooxygenase 1
8090180	0.0972	0.0238	-2.31858	-4.34297	-1.07452	1.07452	MUC13	mucin 13, cell surface associated
7923332	6.11e-08	7.97e-10	-7.28584	12.1647	-1.07441	1.07441	TNNT2	troponin T2, cardiac type
7983650	0.334	0.139	-1.49861	-5.82482	-1.07301	1.07301	SLC27A2	solute carrier family 27 member 2
8036010	0.00155	0.000123	-4.1071	0.54479	-1.07276	1.07276	PEPD	peptidase D
7908072	0.019	0.00279	-3.11815	-2.39925	-1.07269	1.07269	LAMC2	laminin subunit gamma 2
8135601	4.21e-06	1.04e-07	6.03892	7.38792	1.07245	1.07245	MET	MET proto-oncogene, receptor tyrosine kinase
7944478	5.74e-05	2.34e-06	-5.2196	4.36174	-1.07199	1.07199	PDZD3	PDZ domain containing 3
7995258	2.98e-06	6.84e-08	6.14869	7.80234	1.07199	1.07199	ZNF267	zinc finger protein 267
8038824	0.000114	5.32e-06	4.99647	3.56403	1.07186	1.07186	SIGLEC10	sialic acid binding Ig like lectin 10
8137244	7.68e-05	3.32e-06	5.12466	4.0207	1.07184	1.07184	GIMAP4	GTPase, IMAP family member 4
8081645	0.000332	1.9e-05	-4.64368	2.33275	-1.07174	1.07174	C3orf52	chromosome 3 open reading frame 52
7967660	2.76e-10	1.79e-12	-8.83803	18.158	-1.07168	1.07168	RIMBP2	RIMS binding protein 2
8024323	3.24e-07	5.48e-09	-6.79592	10.2738	-1.07168	1.07168	REEP6	receptor accessory protein 6
7963289	0.0031	0.000284	3.85498	-0.25345	1.07103	1.07103	BIN2	bridging integrator 2
8056022	0.017	0.00241	-3.1678	-2.26441	-1.071	1.071	CCDC148	coiled-coil domain containing 148
8101874	0.00311	0.000285	-3.85396	-0.25663	-1.07092	1.07092	ADH1A	alcohol dehydrogenase 1A (class I), alpha polypeptide
8005458	0.000703	4.73e-05	4.38532	1.45788	1.07068	1.07068	LGALS9C///LGALS9B///LGALS9	galectin 9C///galectin 9B///galectin 9
8047702	0.0677	0.0147	2.51104	-3.91663	1.0703	1.0703	ICOS	inducible T-cell costimulator
7928189	0.000107	4.91e-06	5.01816	3.64097	1.07023	1.07023	UNC5B	unc-5 netrin receptor B
8114491	0.0271	0.0044	-2.95977	-2.81892	-1.07018	1.07018	SLC23A1	solute carrier family 23 member 1
7898627	6.62e-11	3.76e-13	-9.24043	19.6933	-1.0701	1.0701	VWA5B1	von Willebrand factor A domain containing 5B1
7967107	0.0236	0.00368	-3.02204	-2.65584	-1.06991	1.06991	HNF1A-AS1	HNF1A antisense RNA 1
7952927	6.29e-10	4.67e-12	-8.59233	17.2152	-1.06803	1.06803	B4GALNT3	beta-1,4-N-acetyl-galactosaminyltransferase 3
8119052	1.39e-07	2.04e-09	-7.04728	11.2426	-1.06754	1.06754	PNPLA1	patatin like phospholipase domain containing 1
8123651	2.61e-11	1.26e-13	-9.52301	20.7637	-1.06658	1.06658	TUBB2B	tubulin beta 2B class IIb
7954481	1.8e-05	5.75e-07	5.59287	5.72382	1.06649	1.06649	SSPN	sarcospan
7982287	5.95e-05	2.45e-06	5.20684	4.31579	1.06633	1.06633	ARHGAP11B	Rho GTPase activating protein 11B
7996341	2.93e-06	6.71e-08	-6.15362	7.821	-1.06598	1.06598	PDP2	pyruvate dehyrogenase phosphatase catalytic subunit 2
7930631	6.03e-09	5.7e-11	-7.9549	14.7553	-1.06598	1.06598	TDRD1	tudor domain containing 1
8049471	5.24e-05	2.1e-06	5.24796	4.46409	1.06573	1.06573	ACKR3	atypical chemokine receptor 3
7902290	8.45e-05	3.71e-06	-5.09424	3.91191	-1.06546	1.06546	CTH	cystathionine gamma-lyase
8045030	0.0329	0.00566	-2.86959	-3.05062	-1.06529	1.06529	MYO7B	myosin VIIB
8035304	8.06e-06	2.23e-07	5.84115	6.64586	1.06498	1.06498	BST2	bone marrow stromal cell antigen 2
7917182	0.00359	0.000341	3.79905	-0.4265	1.06451	1.06451	ADGRL4	adhesion G protein-coupled receptor L4
7948344	0.322	0.132	-1.52828	-5.78127	-1.06259	1.06259	GLYAT	glycine-N-acyltransferase
8051001	5.55e-06	1.44e-07	5.95576	7.07513	1.06259	1.06259	CGREF1	cell growth regulator with EF-hand domain 1
8157300	1.08e-05	3.17e-07	-5.75004	6.30616	-1.06211	1.06211	BSPRY	B-box and SPRY domain containing
8042416	1.09e-05	3.22e-07	5.74524	6.28829	1.06195	1.06195	ARHGAP25	Rho GTPase activating protein 25
7936201	0.0016	0.000128	-4.09475	0.50504	-1.06179	1.06179	CFAP43	cilia and flagella associated protein 43
8026915	0.000382	2.26e-05	4.59492	2.16581	1.06116	1.06116	ARRDC2	arrestin domain containing 2
8114119	7e-06	1.89e-07	-5.88448	6.80789	-1.06076	1.06076	FSTL4	follistatin like 4
7923875	0.133	0.0363	2.14125	-4.71055	1.0607	1.0607	C1orf186	chromosome 1 open reading frame 186
7955719	2.21e-06	4.81e-08	-6.2392	8.14526	-1.06065	1.06065	HIGD1A	HIG1 hypoxia inducible domain family member 1A
7995838	0.0391	0.00707	-2.789	-3.25309	-1.06039	1.06039	MT1X	metallothionein 1X
8029006	3.74e-06	9.02e-08	6.07695	7.53131	1.06025	1.06025	AXL	AXL receptor tyrosine kinase
7938880	0.000894	6.3e-05	4.30231	1.18212	1.06016	1.06016	HTATIP2	HIV-1 Tat interactive protein 2
7981947	0.000384	2.29e-05	-4.59204	2.15594	-1.05973	1.05973	SNORD109B///SNORD109A	small nucleolar RNA, C/D box 109B///small nucleolar RNA, C/D box 109A
7982098	0.000384	2.29e-05	-4.59204	2.15594	-1.05973	1.05973	SNORD109B///SNORD109A	small nucleolar RNA, C/D box 109B///small nucleolar RNA, C/D box 109A
7966448	7.27e-07	1.37e-08	-6.56121	9.37293	-1.05959	1.05959	TMEM116	transmembrane protein 116
8045563	0.000533	3.39e-05	4.48024	1.77643	1.05947	1.05947	ARHGAP15	Rho GTPase activating protein 15
7917516	0.00428	0.000423	3.73178	-0.63253	1.05918	1.05918	GBP1P1///GBP3///GBP1	guanylate binding protein 1 pseudogene 1///guanylate binding protein 3///guanylate binding protein 1
8135015	0.00138	0.000105	4.15169	0.68896	1.05859	1.05859	MUC3B///MUC3A	mucin 3B, cell surface associated///mucin 3A, cell surface associated
7929032	1.99e-05	6.53e-07	5.55959	5.60112	1.05793	1.05793	FAS	Fas cell surface death receptor
8002492	0.00675	0.000749	-3.55234	-1.17083	-1.05769	1.05769	HYDIN2///HYDIN	HYDIN2, axonemal central pair apparatus protein (pseudogene)///HYDIN, axonemal central pair apparatus protein
8097017	0.00167	0.000134	-4.08019	0.45822	-1.05686	1.05686	UGT8	UDP glycosyltransferase 8
8100393	0.00697	0.000777	3.54038	-1.20609	1.05594	1.05594	KDR	kinase insert domain receptor
8035941	0.0219	0.00334	-3.05618	-2.56535	-1.05573	1.05573	SLC7A9	solute carrier family 7 member 9
8152668	0.000451	2.77e-05	4.53753	1.97033	1.05489	1.05489	ATAD2	ATPase family, AAA domain containing 2
7910923	4.83e-08	6.12e-10	-7.35273	12.4236	-1.05482	1.05482	FMN2	formin 2
8141872	1.03e-05	3e-07	-5.76384	6.35754	-1.05409	1.05409	NAPEPLD	N-acyl phosphatidylethanolamine phospholipase D
7931914	0.029	0.0048	2.92859	-2.89966	1.05379	1.05379	IL2RA	interleukin 2 receptor subunit alpha
8063796	0.137	0.0379	2.1226	-4.74776	1.05373	1.05373	CDH4	cadherin 4
8060805	0.00174	0.000141	-4.06543	0.41087	-1.05355	1.05355	CHGB	chromogranin B
7952056	0.0537	0.0108	2.63049	-3.63823	1.05217	1.05217	CD3D	CD3d molecule
8033054	3.25e-07	5.51e-09	-6.7943	10.2675	-1.05132	1.05132	FUT3	fucosyltransferase 3 (Lewis blood group)
7977621	0.000316	1.79e-05	-4.66076	2.39144	-1.05061	1.05061	NDRG2	NDRG family member 2
8132347	0.00398	0.000389	3.75826	-0.5517	1.05015	1.05015	GPR141	G protein-coupled receptor 141
8163509	2.95e-09	2.57e-11	-8.15723	15.5378	-1.04857	1.04857	ALAD	aminolevulinate dehydratase
7933092	0.0102	0.00125	3.38593	-1.65453	1.04843	1.04843	ZNF248	zinc finger protein 248
8035351	0.000741	5.03e-05	4.36714	1.39724	1.048	1.048	JAK3	Janus kinase 3
8021685	0.00407	0.000399	3.75028	-0.57612	1.04777	1.04777	CCDC102B	coiled-coil domain containing 102B
8100827	0.254	0.0926	1.70919	-5.49876	1.04711	1.04711	JCHAIN	joining chain of multimeric IgA and IgM
7961654	5.7e-07	1.04e-08	6.63246	9.64593	1.04671	1.04671	RECQL	RecQ like helicase
7997336	1.5e-05	4.64e-07	-5.64969	5.93377	-1.04628	1.04628	VAT1L	vesicle amine transport 1 like
7972021	0.000203	1.05e-05	-4.80819	2.90202	-1.0456	1.0456	TBC1D4	TBC1 domain family member 4
8117760	1.38e-06	2.85e-08	6.37402	8.65791	1.04505	1.04505	HLA-F///HLA-B	major histocompatibility complex, class I, F///major histocompatibility complex, class I, B
7960438	0.00561	0.000591	3.62742	-0.94764	1.04477	1.04477	ANO2	anoctamin 2
8081235	0.00582	0.000618	3.61335	-0.9897	1.04432	1.04432	COL8A1	collagen type VIII alpha 1 chain
8094759	0.00179	0.000146	-4.05528	0.37836	-1.04407	1.04407	NSUN7	NOP2/Sun RNA methyltransferase family member 7
7941148	5.28e-08	6.75e-10	-7.32772	12.3268	-1.04295	1.04295	TM7SF2	transmembrane 7 superfamily member 2
7948511	0.025	0.00396	2.9967	-2.72251	1.04282	1.04282	VWCE	von Willebrand factor C and EGF domains
7919193	1.43e-05	4.39e-07	-5.66416	5.98738	-1.04093	1.04093	NUDT4P1///NUDT4P2///NUDT4	nudix hydrolase 4 pseudogene 1///nudix hydrolase 4 pseudogene 2///nudix hydrolase 4
8171653	0.000119	5.59e-06	-4.98305	3.51649	-1.04053	1.04053	MAP3K15	mitogen-activated protein kinase kinase kinase 15
8135363	0.00073	4.93e-05	4.37312	1.41718	1.04007	1.04007	PIK3CG	phosphatidylinositol-4,5-bisphosphate 3-kinase catalytic subunit gamma
8124889	0.00041	2.48e-05	4.56924	2.07819	1.03946	1.03946	POU5F1P4///POU5F1P3///POU5F1B///POU5F1	POU class 5 homeobox 1 pseudogene 4///POU class 5 homeobox 1 pseudogene 3///POU class 5 homeobox 1B///POU class 5 homeobox 1
8179719	0.00041	2.48e-05	4.56924	2.07819	1.03946	1.03946	POU5F1P4///POU5F1P3///POU5F1B///POU5F1	POU class 5 homeobox 1 pseudogene 4///POU class 5 homeobox 1 pseudogene 3///POU class 5 homeobox 1B///POU class 5 homeobox 1
7958913	0.000994	7.16e-05	4.26503	1.05919	1.03843	1.03843	OAS2	2'-5'-oligoadenylate synthetase 2
8146863	0.0138	0.00184	3.25922	-2.01224	1.03738	1.03738	SULF1	sulfatase 1
8071861	0.00231	0.000199	-3.96241	0.08309	-1.03729	1.03729	SUSD2	sushi domain containing 2
8066214	0.000126	5.93e-06	4.9666	3.45829	1.03604	1.03604	TGM2	transglutaminase 2
8083223	6.98e-07	1.31e-08	6.57257	9.41642	1.03583	1.03583	C3orf58	chromosome 3 open reading frame 58
7957962	0.221	0.0755	1.80848	-5.33157	1.03544	1.03544	SPIC///SPIC	Spi-C transcription factor///Spi-C transcription factor
8010841	0.000525	3.34e-05	-4.48484	1.79198	-1.03311	1.03311	FN3K	fructosamine 3 kinase
7982663	0.000292	1.63e-05	4.68786	2.48476	1.0322	1.0322	BUB1B	BUB1 mitotic checkpoint serine/threonine kinase B
8115076	0.000326	1.86e-05	4.65002	2.35454	1.03201	1.03201	CSF1R	colony stimulating factor 1 receptor
8116921	0.0717	0.0159	2.48235	-3.98194	1.03171	1.03171	EDN1	endothelin 1
8149733	2.96e-05	1.06e-06	5.43067	5.12805	1.03146	1.03146	TNFRSF10B	TNF receptor superfamily member 10b
7966690	0.000923	6.56e-05	-4.29076	1.14396	-1.03111	1.03111	TBX3	T-box 3
7972946	1.12e-05	3.31e-07	5.73826	6.26234	1.03084	1.03084	RASA3	RAS p21 protein activator 3
7995007	2.37e-05	8.02e-07	5.50519	5.40108	1.03082	1.03082	HSD3B7	hydroxy-delta-5-steroid dehydrogenase, 3 beta- and steroid delta-isomerase 7
8043363	1.31e-05	3.97e-07	5.69045	6.0848	1.03078	1.03078	MIR4435-2HG///LINC00152	MIR4435-2 host gene///long intergenic non-protein coding RNA 152
8134263	0.0772	0.0175	2.44314	-4.07022	1.03074	1.03074	COL1A2///COL1A2	collagen type I alpha 2 chain///collagen type I alpha 2 chain
8153167	0.0324	0.00555	2.87666	-3.03267	1.03065	1.03065	KCNK9	potassium two pore domain channel subfamily K member 9
8021199	1.62e-09	1.33e-11	-8.32563	16.188	-1.03	1.03	MAPK4	mitogen-activated protein kinase 4
8176234	0.000348	2.02e-05	4.62754	2.27741	1.02949	1.02949	CLIC2	chloride intracellular channel 2
7940869	0.00142	0.000109	4.14095	0.65417	1.02911	1.02911	FERMT3	fermitin family member 3
7979378	0.0342	0.00593	-2.85313	-3.09235	-1.02881	1.02881	C14orf105	chromosome 14 open reading frame 105
8167185	3.64e-07	6.24e-09	6.76278	10.1463	1.0287	1.0287	TIMP1	TIMP metallopeptidase inhibitor 1
7899534	0.00778	0.000889	3.49728	-1.33258	1.02866	1.02866	EPB41	erythrocyte membrane protein band 4.1
8163383	6.73e-05	2.84e-06	-5.16716	4.17306	-1.02806	1.02806	SUSD1	sushi domain containing 1
8106556	0.0337	0.00582	-2.85974	-3.07561	-1.02795	1.02795	CMYA5	cardiomyopathy associated 5
8098576	0.00015	7.38e-06	-4.90678	3.24732	-1.02786	1.02786	SLC25A4	solute carrier family 25 member 4
7955055	5.22e-10	3.81e-12	-8.6442	17.4145	-1.02781	1.02781	SLC48A1	solute carrier family 48 member 1
7900540	0.000169	8.52e-06	4.86722	3.1084	1.02769	1.02769	RIMKLA	ribosomal modification protein rimK like family member A
8044021	0.0472	0.00907	-2.69654	-3.47989	-1.02749	1.02749	IL1RL1	interleukin 1 receptor like 1
8062119	0.00136	0.000104	-4.15577	0.7022	-1.02702	1.02702	MT1P3	metallothionein 1 pseudogene 3
8091446	0.00624	0.000674	-3.58566	-1.07216	-1.02678	1.02678	PFN2	profilin 2
8138718	9.75e-06	2.81e-07	-5.78119	6.42214	-1.02675	1.02675	HOXA2	homeobox A2
8163505	0.000255	1.39e-05	-4.73164	2.63601	-1.02634	1.02634	HDHD3	haloacid dehalogenase like hydrolase domain containing 3
7933723	3.71e-06	8.92e-08	6.07986	7.54228	1.02628	1.02628	IPMK	inositol polyphosphate multikinase
8010915	0.00449	0.000452	3.7116	-0.69392	1.02555	1.02555	FAM101B	family with sequence similarity 101 member B
8009653	9.53e-06	2.72e-07	5.78934	6.45252	1.02463	1.02463	CD300A	CD300a molecule
8127130	0.0142	0.00191	-3.24638	-2.04796	-1.02459	1.02459	GCM1	glial cells missing homolog 1
8179019	2.04e-07	3.22e-09	6.93134	10.7953	1.0241	1.0241	HLA-F///HLA-B	major histocompatibility complex, class I, F///major histocompatibility complex, class I, B
8068083	0.000343	1.98e-05	4.63211	2.29305	1.02367	1.02367	MAP3K7CL	MAP3K7 C-terminal like
8015460	3.73e-08	4.49e-10	7.43116	12.7272	1.02339	1.02339	ACLY	ATP citrate lyase
8089015	0.00063	4.15e-05	4.42273	1.58302	1.02333	1.02333	PROS1	protein S (alpha)
7982084	0.202	0.0658	-1.87365	-5.21721	-1.02254	1.02254	SNORD115-24///SNORD115-44///SNORD115-43///SNORD115-42///SNORD115-41///SNORD115-40///SNORD115-39///SNORD115-38///SNORD115-36///SNORD115-34///SNORD115-30///SNORD115-29///SNORD115-26///SNORD115-25///SNORD115-22///SNORD115-21///SNORD115-20///SNORD115-19///SNORD115-18///SNORD115-17///SNORD115-16///SNORD115-15///SNORD115-14///SNORD115-13///SNORD115-12///SNORD115-11///SNORD115-10///SNORD115-9///SNORD115…	small nucleolar RNA, C/D box 115-24///small nucleolar RNA, C/D box 115-44///small nucleolar RNA, C/D box 115-43///small nucleolar RNA, C/D box 115-42///small nucleolar RNA, C/D box 115-41///small nucleolar RNA, C/D box 115-40///small nucleolar RNA, C/D box 115-39///small nucleolar RNA, C/D box 115-38///small nucleolar RNA, C/D box 115-36///small nucleolar RNA, C/D box 115-34///small nucleolar RNA…
7903162	0.00136	0.000104	-4.15716	0.70669	-1.022	1.022	TMEM56-RWDD3///TMEM56	TMEM56-RWDD3 readthrough///transmembrane protein 56
8013622	2.22e-08	2.52e-10	-7.57801	13.2959	-1.0219	1.0219	SGK494///SPAG5	uncharacterized serine/threonine-protein kinase SgK494///sperm associated antigen 5
8086451	5.85e-06	1.53e-07	-5.93975	7.01506	-1.0218	1.0218	HIGD1A	HIG1 hypoxia inducible domain family member 1A
8148070	0.0645	0.0138	-2.53545	-3.86059	-1.0217	1.0217	COL14A1	collagen type XIV alpha 1 chain
8073633	0.0089	0.00105	-3.44251	-1.4918	-1.02141	1.02141	PNPLA3	patatin like phospholipase domain containing 3
7921840	3.07e-10	2.01e-12	-8.80821	18.0438	-1.02107	1.02107	NR1I3	nuclear receptor subfamily 1 group I member 3
8006187	3.89e-07	6.69e-09	6.74499	10.078	1.0209	1.0209	ATAD5	ATPase family, AAA domain containing 5
8135378	0.000347	2.01e-05	-4.62893	2.28215	-1.02074	1.02074	PRKAR2B	protein kinase cAMP-dependent type II regulatory subunit beta
7929078	0.000111	5.11e-06	5.00756	3.60334	1.02059	1.02059	KIF20B	kinesin family member 20B
8065948	0.00628	0.000681	3.58271	-1.08093	1.02054	1.02054	FER1L4	fer-1 like family member 4, pseudogene
7983890	1.42e-06	2.92e-08	-6.36744	8.63285	-1.02032	1.02032	MYZAP///GCOM1	myocardial zonula adherens protein///GRINL1A complex locus 1
8020806	0.00456	0.000459	3.70658	-0.70915	1.02007	1.02007	RNF125	ring finger protein 125
8142585	2.5e-05	8.53e-07	-5.48868	5.34049	-1.01986	1.01986	CADPS2	calcium dependent secretion activator 2
8088458	1.49e-07	2.22e-09	-7.02565	11.1591	-1.01923	1.01923	FHIT	fragile histidine triad
8096753	2.04e-07	3.25e-09	-6.92895	10.7861	-1.01918	1.01918	HADH	hydroxyacyl-CoA dehydrogenase
8043835	0.0214	0.00324	-3.06685	-2.53694	-1.01819	1.01819	C2orf15	chromosome 2 open reading frame 15
8151032	0.00185	0.000152	-4.04302	0.33916	-1.01816	1.01816	GGH	gamma-glutamyl hydrolase
7912316	3.71e-10	2.51e-12	-8.7517	17.8272	-1.01813	1.01813	CASZ1	castor zinc finger 1
8131944	0.000147	7.23e-06	4.91251	3.26749	1.01812	1.01812	NFE2L3	nuclear factor, erythroid 2 like 3
8141328	0.126	0.0337	2.17304	-4.64648	1.01792	1.01792	CYP3A5	cytochrome P450 family 3 subfamily A member 5
8105061	0.0509	0.01	2.65851	-3.57144	1.01782	1.01782	FYB	FYN binding protein
8122222	0.00463	0.000468	-3.70057	-0.72738	-1.01769	1.01769	PDE7B	phosphodiesterase 7B
7931353	6.28e-09	6.02e-11	7.94116	14.7022	1.01752	1.01752	PTPRE	protein tyrosine phosphatase, receptor type E
8180029	0.00704	0.000787	3.53635	-1.21796	1.01735	1.01735	HLA-DQB2///HLA-DQB1	major histocompatibility complex, class II, DQ beta 2///major histocompatibility complex, class II, DQ beta 1
8105523	0.00811	0.000937	3.48041	-1.38178	1.01706	1.01706	KIF2A	kinesin family member 2A
7989146	0.00347	0.000327	-3.81119	-0.38907	-1.0158	1.0158	MNS1	meiosis specific nuclear structural 1
8108729	0.0454	0.00861	2.71587	-3.43296	1.01553	1.01553	PCDHB11	protocadherin beta 11
8061416	0.0518	0.0103	2.64988	-3.59206	1.01481	1.01481	CST7	cystatin F
8166455	1.98e-07	3.08e-09	6.94268	10.839	1.01437	1.01437	PRDX4	peroxiredoxin 4
7982000	0.0284	0.00467	-2.93867	-2.87363	-1.01362	1.01362	SNORD116-26	small nucleolar RNA, C/D box 116-26
7901687	1.03e-11	4.43e-14	-9.79708	21.7949	-1.01225	1.01225	TMEM61	transmembrane protein 61
8141459	0.000211	1.11e-05	4.79455	2.85448	1.01186	1.01186	GAL3ST4	galactose-3-O-sulfotransferase 4
8099685	0.0303	0.00508	-2.90819	-2.95212	-1.01178	1.01178	LGI2	leucine rich repeat LGI family member 2
8042830	0.00837	0.000976	3.46746	-1.41947	1.01083	1.01083	MTHFD2	methylenetetrahydrofolate dehydrogenase (NADP+ dependent) 2, methenyltetrahydrofolate cyclohydrolase
8080781	4.67e-10	3.28e-12	-8.68262	17.5621	-1.01077	1.01077	PXK	PX domain containing serine/threonine kinase like
7969243	0.000153	7.54e-06	4.90092	3.22674	1.01023	1.01023	CKAP2	cytoskeleton associated protein 2
7923700	0.000101	4.57e-06	-5.03786	3.71099	-1.00972	1.00972	LRRN2	leucine rich repeat neuronal 2
7928429	0.00479	0.000488	-3.68762	-0.76658	-1.00951	1.00951	PLAU	plasminogen activator, urokinase
8135955	2.37e-05	8e-07	5.50583	5.4034	1.00917	1.00917	CALU	calumenin
8055478	1.04e-06	2.05e-08	-6.45906	8.98231	-1.00854	1.00854	NXPH2	neurexophilin 2
8060344	0.0233	0.00361	3.02892	-2.63766	1.00849	1.00849	TRIB3	tribbles pseudokinase 3
8057620	0.0105	0.0013	3.37457	-1.68698	1.00802	1.00802	COL5A2	collagen type V alpha 2 chain
8001030	0.00127	9.54e-05	4.18111	0.78455	1.00802	1.00802	PYCARD	PYD and CARD domain containing
7981013	0.0497	0.00974	2.67	-3.54389	1.0074	1.0074	PRIMA1	proline rich membrane anchor 1
7935058	1.86e-09	1.55e-11	8.28642	16.0367	1.00717	1.00717	MYOF	myoferlin
8048350	2.5e-05	8.56e-07	-5.48776	5.33709	-1.00584	1.00584	PLCD4	phospholipase C delta 4
8125500	2.89e-06	6.59e-08	6.15801	7.83761	1.00539	1.00539	PSMB8	proteasome subunit beta 8
8178855	2.89e-06	6.59e-08	6.15801	7.83761	1.00539	1.00539	PSMB8	proteasome subunit beta 8
8180049	2.89e-06	6.59e-08	6.15801	7.83761	1.00539	1.00539	PSMB8	proteasome subunit beta 8
7990309	1.26e-06	2.55e-08	-6.40293	8.76808	-1.00517	1.00517	STRA6	stimulated by retinoic acid 6
8178205	0.00355	0.000337	3.80247	-0.41594	1.00507	1.00507	HLA-DQA2///HLA-DQA1	major histocompatibility complex, class II, DQ alpha 2///major histocompatibility complex, class II, DQ alpha 1
8119918	0.0015	0.000117	4.12002	0.58648	1.00469	1.00469	C6orf223	chromosome 6 open reading frame 223
7973510	3.53e-07	6.02e-09	-6.77186	10.1813	-1.00446	1.00446	CPNE6	copine 6
8028955	0.0122	0.00158	-3.31079	-1.86777	-1.00347	1.00347	CYP2B7P	cytochrome P450 family 2 subfamily B member 7, pseudogene
8177717	2.85e-07	4.69e-09	6.83512	10.4246	1.00332	1.00332	HLA-F///HLA-B	major histocompatibility complex, class I, F///major histocompatibility complex, class I, B
8059854	0.00782	0.000896	3.49485	-1.33968	1.00322	1.00322	ARL4C	ADP ribosylation factor like GTPase 4C
8171624	0.259	0.0954	1.69394	-5.52369	1.00322	1.00322	ADGRG2	adhesion G protein-coupled receptor G2
8160663	4.89e-06	1.23e-07	-5.99627	7.22737	-1.00266	1.00266	AQP7	aquaporin 7
8154476	7.44e-08	9.94e-10	-7.2296	11.9472	-1.00257	1.00257	SH3GL2	SH3 domain containing GRB2 like 2, endophilin A1
8129637	0.0266	0.00428	2.96968	-2.79315	1.00238	1.00238	VNN2	vanin 2
7993478	0.000114	5.3e-06	4.99728	3.56689	1.00095	1.00095	ABCC1	ATP binding cassette subfamily C member 1
8117426	0.0101	0.00123	3.39131	-1.63913	1.00081	1.00081	HIST1H2BH///HIST1H2BH	histone cluster 1, H2bh///histone cluster 1, H2bh
7976578	2.64e-05	9.16e-07	-5.46968	5.2708	-1.00076	1.00076	AK7	adenylate kinase 7
8052269	1.67e-06	3.52e-08	6.31993	8.45197	0.999839	0.999839	CCDC88A	coiled-coil domain containing 88A
7904843	0.0894	0.0212	-2.3659	-4.24074	-0.999545	0.999545	PDZK1P1///PDZK1	PDZ domain containing 1 pseudogene 1///PDZ domain containing 1
8068361	0.0179	0.00259	-3.14376	-2.3299	-0.999229	0.999229	SLC5A3	solute carrier family 5 member 3
8039006	0.00923	0.0011	3.42758	-1.53492	0.998555	0.998555	ZNF320	zinc finger protein 320
8059905	0.177	0.0546	1.9602	-5.05981	0.998343	0.998343	COL6A3	collagen type VI alpha 3 chain
8126770	0.00922	0.0011	-3.42836	-1.53265	-0.998075	0.998075	CYP39A1	cytochrome P450 family 39 subfamily A member 1
8130556	0.000561	3.61e-05	4.46216	1.71549	0.997164	0.997164	SOD2	superoxide dismutase 2, mitochondrial
7922773	0.0012	8.96e-05	4.19952	0.84453	0.996878	0.996878	NCF2	neutrophil cytosolic factor 2
7908597	0.00371	0.000356	3.78536	-0.4686	0.996661	0.996661	NR5A2	nuclear receptor subfamily 5 group A member 2
8103695	0.00151	0.000119	-4.11664	0.57559	-0.996618	0.996618	MFAP3L	microfibrillar associated protein 3 like
7975284	0.00918	0.00109	-3.43045	-1.52663	-0.99634	0.99634	RDH12	retinol dehydrogenase 12 (all-trans/9-cis/11-cis)
8072687	1.43e-07	2.11e-09	7.0385	11.2087	0.995888	0.995888	MCM5	minichromosome maintenance complex component 5
8097991	0.323	0.132	1.52589	-5.7848	0.995679	0.995679	TDO2	tryptophan 2,3-dioxygenase
8162652	6.72e-06	1.8e-07	-5.89765	6.85719	-0.994619	0.994619	CTSV	cathepsin V
7978595	4.32e-09	3.93e-11	8.0492	15.1201	0.994407	0.994407	BAZ1A	bromodomain adjacent to zinc finger domain 1A
8027778	6.04e-07	1.11e-08	6.61501	9.57901	0.994105	0.994105	FXYD5	FXYD domain containing ion transport regulator 5
8005171	1.15e-06	2.29e-08	6.43054	8.87344	0.994024	0.994024	TRPV2	transient receptor potential cation channel subfamily V member 2
8006621	0.0322	0.0055	2.87974	-3.02482	0.993866	0.993866	CCL4L1///CCL4L2///CCL4///CCL4L1	C-C motif chemokine ligand 4 like 1///C-C motif chemokine ligand 4 like 2///C-C motif chemokine ligand 4///C-C motif chemokine ligand 4 like 1
8019651	0.0322	0.0055	2.87974	-3.02482	0.993866	0.993866	CCL4L1///CCL4L2///CCL4///CCL4L1	C-C motif chemokine ligand 4 like 1///C-C motif chemokine ligand 4 like 2///C-C motif chemokine ligand 4///C-C motif chemokine ligand 4 like 1
7951593	5.81e-06	1.52e-07	-5.94176	7.02258	-0.993851	0.993851	COLCA1	colorectal cancer associated 1
7916986	0.0152	0.00209	-3.21677	-2.12996	-0.993788	0.993788	NEGR1	neuronal growth regulator 1
7953723	3.34e-07	5.68e-09	6.7864	10.2372	0.993393	0.993393	CLEC4A	C-type lectin domain family 4 member A
8051396	8.16e-06	2.28e-07	5.83556	6.62495	0.993239	0.993239	NLRC4	NLR family CARD domain containing 4
8173444	0.0787	0.0179	2.43327	-4.09226	0.992752	0.992752	IL2RG	interleukin 2 receptor subunit gamma
8021169	0.019	0.00278	-3.11893	-2.39715	-0.992682	0.992682	LIPG	lipase G, endothelial type
7944931	0.000517	3.27e-05	4.49071	1.8118	0.992437	0.992437	SLC37A2	solute carrier family 37 member 2
8142646	0.108	0.0275	-2.25877	-4.46969	-0.992359	0.992359	IQUB	IQ motif and ubiquitin domain containing
8109344	2.21e-05	7.35e-07	5.52828	5.48589	0.991492	0.991492	GM2A	GM2 ganglioside activator
8106923	0.00324	0.000302	-3.83619	-0.31177	-0.99082	0.99082	NR2F1	nuclear receptor subfamily 2 group F member 1
8124437	0.00365	0.000348	3.79217	-0.44767	0.990232	0.990232	HIST1H3F	histone cluster 1, H3f
7942135	0.0216	0.00328	3.06259	-2.5483	0.990231	0.990231	ANO1	anoctamin 1
8132694	0.368	0.162	1.41564	-5.9424	0.990062	0.990062	IGFBP1	insulin like growth factor binding protein 1
7901187	5.61e-11	3.07e-13	-9.29273	19.892	-0.989969	0.989969	LURAP1	leucine rich adaptor protein 1
8130732	2.51e-05	8.59e-07	-5.4869	5.33393	-0.989756	0.989756	MPC1	mitochondrial pyruvate carrier 1
8094533	0.055	0.0112	2.61745	-3.66911	0.988729	0.988729	DTHD1	death domain containing 1
8118564	0.0045	0.000452	3.71104	-0.69561	0.988497	0.988497	HLA-DQA2///HLA-DQA1	major histocompatibility complex, class II, DQ alpha 2///major histocompatibility complex, class II, DQ alpha 1
8171449	0.521	0.287	-1.07417	-6.35951	-0.988294	0.988294	ACE2	angiotensin I converting enzyme 2
8166065	0.00579	0.000614	3.6155	-0.9833	0.987979	0.987979	TLR8	toll like receptor 8
8018731	2.98e-08	3.48e-10	7.49614	12.9789	0.987956	0.987956	RHBDF2	rhomboid 5 homolog 2
8108737	0.000118	5.49e-06	4.98795	3.53384	0.987784	0.987784	PCDHB13	protocadherin beta 13
7975889	1.48e-06	3.06e-08	6.35555	8.58755	0.985804	0.985804	VASH1	vasohibin 1
8087419	1.99e-06	4.29e-08	-6.26914	8.2589	-0.98544	0.98544	AMT///AMT	aminomethyltransferase///aminomethyltransferase
7937079	3.77e-05	1.42e-06	5.35393	4.84824	0.985344	0.985344	BNIP3	BCL2 interacting protein 3
7917649	0.00634	0.00069	-3.57819	-1.09434	-0.984591	0.984591	TGFBR3	transforming growth factor beta receptor 3
8163063	8.72e-05	3.86e-06	-5.08401	3.8754	-0.984502	0.984502	CTNNAL1	catenin alpha like 1
8139433	0.00222	0.000189	3.97731	0.13021	0.984086	0.984086	MYO1G	myosin IG
8019778	5.06e-05	2e-06	-5.26173	4.51385	-0.983955	0.983955	PCYT2	phosphate cytidylyltransferase 2, ethanolamine
8062461	0.536	0.301	1.04423	-6.39087	0.983589	0.983589	LBP	lipopolysaccharide binding protein
8089911	0.000132	6.32e-06	4.94922	3.39689	0.983372	0.983372	HCLS1	hematopoietic cell-specific Lyn substrate 1
8151824	0.0175	0.00251	3.15433	-2.30116	0.98333	0.98333	RAD54B	RAD54 homolog B (S. cerevisiae)
8118124	0.00606	0.00065	-3.59735	-1.0374	-0.982429	0.982429	MCCD1	mitochondrial coiled-coil domain 1
8102482	7.44e-05	3.19e-06	5.1358	4.06057	0.982317	0.982317	SEC24D	SEC24 homolog D, COPII coat complex component
8053030	0.143	0.0401	-2.09806	-4.79629	-0.982007	0.982007	NAT8B	N-acetyltransferase 8B (putative, gene/pseudogene)
8161004	0.00249	0.000218	3.93476	-0.00405	0.98182	0.98182	CD72	CD72 molecule
7925320	0.00327	0.000306	3.83223	-0.32404	0.981734	0.981734	NID1	nidogen 1
8153959	1.66e-06	3.48e-08	6.32269	8.46247	0.981321	0.981321	DOCK8	dedicator of cytokinesis 8
8147516	0.0168	0.00238	-3.17251	-2.25155	-0.98116	0.98116	MATN2	matrilin 2
8167356	6.12e-05	2.53e-06	-5.19788	4.2835	-0.980774	0.980774	GLOD5	glyoxalase domain containing 5
8043602	2.56e-05	8.79e-07	5.48077	5.31146	0.980258	0.980258	NCAPH	non-SMC condensin I complex subunit H
8144557	0.0128	0.00168	-3.28946	-1.92772	-0.980083	0.980083	MSRA	methionine sulfoxide reductase A
8116780	0.225	0.0778	-1.79402	-5.35644	-0.980046	0.980046	DSP	desmoplakin
8106516	0.000555	3.56e-05	-4.46616	1.72897	-0.979807	0.979807	JMY	junction mediating and regulatory protein, p53 cofactor
7945014	9.5e-05	4.25e-06	5.05768	3.78151	0.979779	0.979779	CHEK1	checkpoint kinase 1
8176692	6.36e-06	1.69e-07	-5.91381	6.91777	-0.979524	0.979524	TTTY9B///TTTY9A///TTTY9B///TTTY9A	testis-specific transcript, Y-linked 9B (non-protein coding)///testis-specific transcript, Y-linked 9A (non-protein coding)///testis-specific transcript, Y-linked 9B (non-protein coding)///testis-specific transcript, Y-linked 9A (non-protein coding)
8177195	6.36e-06	1.69e-07	-5.91381	6.91777	-0.979524	0.979524	TTTY9B///TTTY9A///TTTY9B///TTTY9A	testis-specific transcript, Y-linked 9B (non-protein coding)///testis-specific transcript, Y-linked 9A (non-protein coding)///testis-specific transcript, Y-linked 9B (non-protein coding)///testis-specific transcript, Y-linked 9A (non-protein coding)
8117395	0.0219	0.00333	3.05693	-2.56336	0.979489	0.979489	HIST1H2BF	histone cluster 1, H2bf
8034227	2.57e-05	8.86e-07	-5.47873	5.304	-0.979404	0.979404	RGL3	ral guanine nucleotide dissociation stimulator like 3
7953901	0.0262	0.0042	2.97587	-2.77702	0.979403	0.979403	CLEC12A	C-type lectin domain family 12 member A
8023575	0.000205	1.07e-05	-4.80404	2.88754	-0.979324	0.979324	CCBE1	collagen and calcium binding EGF domains 1
8094240	0.1	0.0248	2.30239	-4.37755	0.978767	0.978767	CD38	CD38 molecule
8113616	3.29e-05	1.21e-06	5.39626	5.00243	0.978716	0.978716	FEM1C	fem-1 homolog C
8106098	0.0116	0.00148	3.33201	-1.80789	0.976696	0.976696	MAP1B	microtubule associated protein 1B
7962827	0.000879	6.17e-05	-4.30844	1.20241	-0.976372	0.976372	SNORA2A	small nucleolar RNA, H/ACA box 2A
8017619	0.016	0.00222	3.19539	-2.18885	0.975371	0.975371	PECAM1	platelet and endothelial cell adhesion molecule 1
8067969	0.00139	0.000107	-4.1481	0.67731	-0.973555	0.973555	CHODL	chondrolectin
8096004	1.94e-05	6.28e-07	5.56977	5.63863	0.973441	0.973441	BMP2K	BMP2 inducible kinase
7970162	0.00826	0.000958	3.47331	-1.40245	0.973188	0.973188	ATP11A	ATPase phospholipid transporting 11A
7995793	0.000567	3.66e-05	-4.45853	1.70328	-0.97287	0.97287	NUTF2///MT1L	nuclear transport factor 2///metallothionein 1L (gene/pseudogene)
8098006	0.00566	0.000597	-3.6243	-0.957	-0.972424	0.972424	GLRB	glycine receptor beta
8125447	0.022	0.00336	3.05427	-2.57044	0.972336	0.972336	HLA-DRB1///HLA-DQB1	major histocompatibility complex, class II, DR beta 1///major histocompatibility complex, class II, DQ beta 1
8023466	1.56e-07	2.34e-09	-7.01237	11.1079	-0.971646	0.971646	FECH	ferrochelatase
8050232	1.1e-07	1.57e-09	-7.11431	11.5015	-0.971117	0.971117	CYS1	cystin 1
7967325	1.79e-07	2.74e-09	-6.97222	10.9529	-0.971055	0.971055	HCAR1	hydroxycarboxylic acid receptor 1
8151931	0.0168	0.00237	-3.17327	-2.24947	-0.970895	0.970895	TSPYL5	TSPY like 5
8046560	1.4e-07	2.07e-09	-7.04397	11.2298	-0.970092	0.970092	HOXD3	homeobox D3
8044766	5.8e-06	1.51e-07	5.94247	7.02526	0.969915	0.969915	INSIG2	insulin induced gene 2
8089771	0.00152	0.00012	4.11355	0.56559	0.969572	0.969572	CD80	CD80 molecule
8017843	0.159	0.0469	2.02892	-4.93041	0.969412	0.969412	SLC16A6	solute carrier family 16 member 6
7914202	0.00231	0.000199	3.96293	0.08474	0.96849	0.96849	SNHG12///SNORA16A///SNORA61///SNORA44///SNHG12	small nucleolar RNA host gene 12///small nucleolar RNA, H/ACA box 16A///small nucleolar RNA, H/ACA box 61///small nucleolar RNA, H/ACA box 44///small nucleolar RNA host gene 12
8141688	8.66e-06	2.45e-07	5.81737	6.55704	0.968192	0.968192	PLOD3	procollagen-lysine,2-oxoglutarate 5-dioxygenase 3
8111524	3.79e-05	1.43e-06	-5.3512	4.83829	-0.967869	0.967869	UGT3A2	UDP glycosyltransferase family 3 member A2
8086607	0.237	0.0837	-1.75857	-5.41668	-0.967849	0.967849	LTF	lactotransferrin
8032871	9.05e-08	1.26e-09	7.17033	11.718	0.967515	0.967515	DPP9	dipeptidyl peptidase 9
8108716	0.0141	0.00189	3.25015	-2.03748	0.967205	0.967205	PCDHB16	protocadherin beta 16
8048782	3.95e-06	9.66e-08	-6.05924	7.4645	-0.966762	0.966762	COL4A3	collagen type IV alpha 3 chain
8118734	0.00643	0.000705	3.57163	-1.11378	0.965696	0.965696	ITPR3	inositol 1,4,5-trisphosphate receptor type 3
8021653	0.000103	4.66e-06	5.03239	3.69152	0.965468	0.965468	SERPINB8	serpin family B member 8
7967028	0.09	0.0215	-2.36126	-4.25084	-0.965301	0.965301	RNU4-2	RNA, U4 small nuclear 2
7978776	1.67e-06	3.52e-08	6.31977	8.45138	0.964906	0.964906	MIS18BP1	MIS18 binding protein 1
7991138	0.0105	0.0013	3.37365	-1.6896	0.964563	0.964563	NMB	neuromedin B
8109712	0.000634	4.18e-05	4.42049	1.5755	0.964304	0.964304	HMMR	hyaluronan mediated motility receptor
8025076	0.00291	0.000264	3.87728	-0.18405	0.963954	0.963954	VAV1	vav guanine nucleotide exchange factor 1
7911281	0.00965	0.00117	-3.40915	-1.58796	-0.96374	0.96374	OR2T35///OR2T2	olfactory receptor family 2 subfamily T member 35///olfactory receptor family 2 subfamily T member 2
7994280	1.58e-08	1.71e-10	7.67574	13.6745	0.963396	0.963396	IL4R	interleukin 4 receptor
7946757	0.00695	0.000775	-3.54158	-1.20256	-0.962675	0.962675	SOX6	SRY-box 6
8120315	0.376	0.168	-1.39646	-5.96869	-0.962636	0.962636	TINAG	tubulointerstitial nephritis antigen
8095021	0.0481	0.00934	2.68579	-3.50586	0.962213	0.962213	SPATA18	spermatogenesis associated 18
7903920	0.0643	0.0138	2.537	-3.85701	0.962036	0.962036	CHI3L2	chitinase 3 like 2
7972682	0.000586	3.8e-05	4.44782	1.66726	0.961452	0.961452	KDELC1	KDEL motif containing 1
8092640	0.000509	3.21e-05	4.49549	1.82794	0.961312	0.961312	RFC4	replication factor C subunit 4
7917561	0.0297	0.00496	2.91689	-2.92978	0.961173	0.961173	GBP4	guanylate binding protein 4
7981998	0.0246	0.00388	-3.00414	-2.70297	-0.960902	0.960902	SNORD116-25	small nucleolar RNA, C/D box 116-25
8058462	0.0181	0.00262	-3.14028	-2.33934	-0.960627	0.960627	MDH1B	malate dehydrogenase 1B
8041422	5.74e-05	2.34e-06	5.2194	4.36102	0.96024	0.96024	RASGRP3	RAS guanyl releasing protein 3
8116130	0.00875	0.00103	3.44926	-1.47226	0.959537	0.959537	FAM153C///FAM153A///FAM153B	family with sequence similarity 153, member C///family with sequence similarity 153 member A///family with sequence similarity 153 member B
8178470	0.00165	0.000132	4.08457	0.47229	0.959178	0.959178	POU5F1P4///POU5F1P3///POU5F1B///POU5F1	POU class 5 homeobox 1 pseudogene 4///POU class 5 homeobox 1 pseudogene 3///POU class 5 homeobox 1B///POU class 5 homeobox 1
7955078	2.73e-07	4.48e-09	-6.84696	10.4702	-0.959114	0.959114	PFKM	phosphofructokinase, muscle
8095139	1.74e-05	5.53e-07	5.60314	5.76172	0.959035	0.959035	SRD5A3	steroid 5 alpha-reductase 3
8107985	1.36e-12	4.89e-15	-10.3788	23.9586	-0.958476	0.958476	CCNI2	cyclin I family member 2
7995926	0.000955	6.82e-05	4.27942	1.10659	0.95669	0.95669	NLRC5	NLR family CARD domain containing 5
7970033	0.00394	0.000384	3.76218	-0.53969	0.955569	0.955569	COL4A2	collagen type IV alpha 2 chain
8130578	0.0372	0.00663	-2.81238	-3.19481	-0.955381	0.955381	SNORA20	small nucleolar RNA, H/ACA box 20
8064485	0.0809	0.0186	2.41852	-4.12508	0.955297	0.955297	SIRPG	signal regulatory protein gamma
7912937	0.0149	0.00203	-3.2269	-2.10197	-0.955192	0.955192	PADI2	peptidyl arginine deiminase 2
8003060	0.0231	0.00357	-3.03318	-2.62641	-0.953992	0.953992	SDR42E1	short chain dehydrogenase/reductase family 42E, member 1
8112920	1.16e-12	4.12e-15	-10.425	24.1287	-0.953903	0.953903	ACOT12	acyl-CoA thioesterase 12
8062766	0.0179	0.00259	3.14327	-2.33123	0.953769	0.953769	MYBL2	MYB proto-oncogene like 2
8124492	0.0252	0.004	2.99341	-2.73113	0.951918	0.951918	HIST1H2BK	histone cluster 1, H2bk
8023995	0.0175	0.0025	3.15552	-2.2979	0.951777	0.951777	FSTL3	follistatin like 3
7969835	0.00347	0.000328	-3.81029	-0.39184	-0.951525	0.951525	PCCA	propionyl-CoA carboxylase alpha subunit
8067167	0.00123	9.2e-05	4.19173	0.81914	0.951371	0.951371	AURKA	aurora kinase A
8077103	8.42e-07	1.61e-08	6.52031	9.2164	0.951182	0.951182	TYMP	thymidine phosphorylase
7915425	2.67e-05	9.3e-07	-5.46569	5.25619	-0.950731	0.950731	ZMYND12	zinc finger MYND-type containing 12
7965565	4.72e-09	4.34e-11	-8.02432	15.0239	-0.949461	0.949461	USP44	ubiquitin specific peptidase 44
8165735	0.00059	3.84e-05	4.44465	1.6566	0.949284	0.949284	CSF2RA	colony stimulating factor 2 receptor alpha subunit
8176306	0.00059	3.84e-05	4.44465	1.6566	0.949284	0.949284	CSF2RA	colony stimulating factor 2 receptor alpha subunit
7984588	0.0021	0.000177	-3.99793	0.19556	-0.948978	0.948978	THSD4	thrombospondin type 1 domain containing 4
8019280	5.06e-05	2e-06	-5.26068	4.51006	-0.948571	0.948571	PCYT2	phosphate cytidylyltransferase 2, ethanolamine
8006940	1.67e-05	5.27e-07	-5.61604	5.80934	-0.948415	0.948415	GRB7	growth factor receptor bound protein 7
8009145	0.000302	1.7e-05	-4.67597	2.44377	-0.948183	0.948183	KCNH6	potassium voltage-gated channel subfamily H member 6
8142554	0.000776	5.31e-05	-4.35192	1.34661	-0.948014	0.948014	AASS	aminoadipate-semialdehyde synthase
8159627	4.13e-05	1.57e-06	-5.32684	4.74975	-0.947698	0.947698	SLC34A3	solute carrier family 34 member 3
8046461	0.000202	1.05e-05	4.80874	2.90392	0.947445	0.947445	ZAK	sterile alpha motif and leucine zipper containing kinase AZK
8105348	0.0104	0.00128	3.37826	-1.67645	0.947415	0.947415	GPX8	glutathione peroxidase 8 (putative)
8100943	0.048	0.00928	2.6882	-3.50006	0.947276	0.947276	RASSF6	Ras association domain family member 6
7983991	3.14e-10	2.06e-12	-8.80151	18.0181	-0.9472	0.9472	FAM81A	family with sequence similarity 81 member A
7908917	0.00259	0.000229	-3.91956	-0.0518	-0.947152	0.947152	BTG2	BTG anti-proliferation factor 2
8112007	0.0078	0.000894	3.49578	-1.33694	0.946958	0.946958	EMB	embigin
7943605	0.0274	0.00446	-2.95476	-2.83194	-0.946921	0.946921	ACAT1	acetyl-CoA acetyltransferase 1
8127193	0.0071	0.000797	-3.5326	-1.229	-0.946718	0.946718	BMP5///BMP5	bone morphogenetic protein 5///bone morphogenetic protein 5
7997712	0.00962	0.00116	3.41075	-1.58337	0.946451	0.946451	IRF8	interferon regulatory factor 8
8154491	0.0135	0.00178	-3.26921	-1.98438	-0.946308	0.946308	ADAMTSL1	ADAMTS like 1
7948167	0.0142	0.0019	3.24772	-2.04423	0.946143	0.946143	APLNR	apelin receptor
7986068	8.5e-06	2.39e-07	5.82369	6.58063	0.946134	0.946134	BLM	Bloom syndrome RecQ like helicase
8009353	0.00751	0.000853	3.51081	-1.29297	0.945502	0.945502	PITPNC1	phosphatidylinositol transfer protein, cytoplasmic 1
8046922	0.108	0.0274	2.26012	-4.46688	0.945067	0.945067	COL3A1	collagen type III alpha 1 chain
7922846	6.28e-05	2.61e-06	5.18969	4.25406	0.94486	0.94486	FAM129A	family with sequence similarity 129 member A
8163629	0.00464	0.000469	3.69966	-0.73013	0.944634	0.944634	TNFSF8	tumor necrosis factor superfamily member 8
8089568	0.0799	0.0183	2.42486	-4.11098	0.944463	0.944463	CD200R1	CD200 receptor 1
8049271	0.00534	0.000557	3.64583	-0.89249	0.94436	0.94436	ATG16L1	autophagy related 16 like 1
8130582	0.487	0.255	-1.14909	-6.27733	-0.943535	0.943535	SLC22A2	solute carrier family 22 member 2
8094679	0.363	0.158	1.42899	-5.9239	0.943396	0.943396	KLB	klotho beta
8115445	0.143	0.0403	2.09538	-4.80157	0.942988	0.942988	TIMD4	T-cell immunoglobulin and mucin domain containing 4
8109926	0.0116	0.00147	-3.33293	-1.80528	-0.94286	0.94286	GABRP	gamma-aminobutyric acid type A receptor pi subunit
8093821	6.73e-05	2.84e-06	-5.16735	4.17377	-0.941877	0.941877	LINC00955	long intergenic non-protein coding RNA 955
8163548	0.00135	0.000103	-4.15796	0.7093	-0.941548	0.941548	KIF12	kinesin family member 12
7902553	0.000967	6.92e-05	4.27521	1.09269	0.941425	0.941425	IFI44	interferon induced protein 44
7899160	0.013	0.00171	3.28266	-1.94677	0.94104	0.94104	CD52	CD52 molecule
7979663	0.000251	1.36e-05	-4.73715	2.6551	-0.939983	0.939983	RAB15	RAB15, member RAS oncogene family
8149324	0.0024	0.000208	-3.94916	0.04131	-0.939397	0.939397	FAM167A	family with sequence similarity 167 member A
8091715	2.94e-05	1.05e-06	5.4346	5.14243	0.939378	0.939378	LXN	latexin
8023063	4.15e-06	1.02e-07	-6.04404	7.4072	-0.939272	0.939272	ATP5A1	ATP synthase, H+ transporting, mitochondrial F1 complex, alpha subunit 1, cardiac muscle
8127841	1.13e-06	2.23e-08	6.43649	8.89613	0.939135	0.939135	PGM3	phosphoglucomutase 3
8043449	0.297	0.116	1.59334	-5.68301	0.93877	0.93877	IGK///IGKC	immunoglobulin kappa locus///immunoglobulin kappa constant
7936968	0.197	0.0637	1.88898	-5.18979	0.938601	0.938601	ADAM12	ADAM metallopeptidase domain 12
7992828	0.000864	6.03e-05	4.31518	1.22471	0.938437	0.938437	IL32	interleukin 32
8094184	0.00011	5.07e-06	-5.0098	3.61129	-0.938431	0.938431	C1QTNF7	C1q and tumor necrosis factor related protein 7
7957386	0.198	0.064	-1.88708	-5.19321	-0.938197	0.938197	ACSS3	acyl-CoA synthetase short-chain family member 3
7950933	0.119	0.0313	-2.205	-4.58125	-0.937893	0.937893	NOX4	NADPH oxidase 4
7965541	3.12e-07	5.24e-09	6.80728	10.3175	0.93771	0.93771	FGD6	FYVE, RhoGEF and PH domain containing 6
8148917	9.17e-09	9.37e-11	-7.82886	14.2675	-0.937375	0.937375	MFSD3	major facilitator superfamily domain containing 3
7962559	0.0154	0.00212	-3.21157	-2.14433	-0.937068	0.937068	SLC38A4	solute carrier family 38 member 4
8031650	0.0688	0.0151	-2.50255	-3.93603	-0.936681	0.936681	ZNF471	zinc finger protein 471
8165752	0.000116	5.41e-06	4.99183	3.54758	0.936612	0.936612	IL3RA	interleukin 3 receptor subunit alpha
8176323	0.000116	5.41e-06	4.99183	3.54758	0.936612	0.936612	IL3RA	interleukin 3 receptor subunit alpha
8155192	0.00136	0.000104	4.15551	0.70135	0.936477	0.936477	GLIPR2	GLI pathogenesis related 2
7982028	0.216	0.0729	-1.82508	-5.30278	-0.936275	0.936275	SNORD115-24///SNORD115-44///SNORD115-43///SNORD115-42///SNORD115-41///SNORD115-40///SNORD115-39///SNORD115-38///SNORD115-36///SNORD115-34///SNORD115-31///SNORD115-30///SNORD115-29///SNORD115-26///SNORD115-25///SNORD115-22///SNORD115-21///SNORD115-20///SNORD115-19///SNORD115-18///SNORD115-17///SNORD115-16///SNORD115-15///SNORD115-14///SNORD115-13///SNORD115-12///SNORD115-11///SNORD115-10///SNORD11…	small nucleolar RNA, C/D box 115-24///small nucleolar RNA, C/D box 115-44///small nucleolar RNA, C/D box 115-43///small nucleolar RNA, C/D box 115-42///small nucleolar RNA, C/D box 115-41///small nucleolar RNA, C/D box 115-40///small nucleolar RNA, C/D box 115-39///small nucleolar RNA, C/D box 115-38///small nucleolar RNA, C/D box 115-36///small nucleolar RNA, C/D box 115-34///small nucleolar RNA…
7982064	0.216	0.0729	-1.82508	-5.30278	-0.936275	0.936275	SNORD115-24///SNORD115-44///SNORD115-43///SNORD115-42///SNORD115-41///SNORD115-40///SNORD115-39///SNORD115-38///SNORD115-36///SNORD115-34///SNORD115-31///SNORD115-30///SNORD115-29///SNORD115-26///SNORD115-25///SNORD115-22///SNORD115-21///SNORD115-20///SNORD115-19///SNORD115-18///SNORD115-17///SNORD115-16///SNORD115-15///SNORD115-14///SNORD115-13///SNORD115-12///SNORD115-11///SNORD115-10///SNORD11…	small nucleolar RNA, C/D box 115-24///small nucleolar RNA, C/D box 115-44///small nucleolar RNA, C/D box 115-43///small nucleolar RNA, C/D box 115-42///small nucleolar RNA, C/D box 115-41///small nucleolar RNA, C/D box 115-40///small nucleolar RNA, C/D box 115-39///small nucleolar RNA, C/D box 115-38///small nucleolar RNA, C/D box 115-36///small nucleolar RNA, C/D box 115-34///small nucleolar RNA…
7982078	0.216	0.0729	-1.82508	-5.30278	-0.936275	0.936275	SNORD115-24///SNORD115-44///SNORD115-43///SNORD115-42///SNORD115-41///SNORD115-40///SNORD115-39///SNORD115-38///SNORD115-36///SNORD115-34///SNORD115-31///SNORD115-30///SNORD115-29///SNORD115-26///SNORD115-25///SNORD115-22///SNORD115-21///SNORD115-20///SNORD115-19///SNORD115-18///SNORD115-17///SNORD115-16///SNORD115-15///SNORD115-14///SNORD115-13///SNORD115-12///SNORD115-11///SNORD115-10///SNORD11…	small nucleolar RNA, C/D box 115-24///small nucleolar RNA, C/D box 115-44///small nucleolar RNA, C/D box 115-43///small nucleolar RNA, C/D box 115-42///small nucleolar RNA, C/D box 115-41///small nucleolar RNA, C/D box 115-40///small nucleolar RNA, C/D box 115-39///small nucleolar RNA, C/D box 115-38///small nucleolar RNA, C/D box 115-36///small nucleolar RNA, C/D box 115-34///small nucleolar RNA…
7982092	0.216	0.0729	-1.82508	-5.30278	-0.936275	0.936275	SNORD115-24///SNORD115-44///SNORD115-43///SNORD115-42///SNORD115-41///SNORD115-40///SNORD115-39///SNORD115-38///SNORD115-36///SNORD115-34///SNORD115-31///SNORD115-30///SNORD115-29///SNORD115-26///SNORD115-25///SNORD115-22///SNORD115-21///SNORD115-20///SNORD115-19///SNORD115-18///SNORD115-17///SNORD115-16///SNORD115-15///SNORD115-14///SNORD115-13///SNORD115-12///SNORD115-11///SNORD115-10///SNORD11…	small nucleolar RNA, C/D box 115-24///small nucleolar RNA, C/D box 115-44///small nucleolar RNA, C/D box 115-43///small nucleolar RNA, C/D box 115-42///small nucleolar RNA, C/D box 115-41///small nucleolar RNA, C/D box 115-40///small nucleolar RNA, C/D box 115-39///small nucleolar RNA, C/D box 115-38///small nucleolar RNA, C/D box 115-36///small nucleolar RNA, C/D box 115-34///small nucleolar RNA…
7987475	0.000374	2.2e-05	4.60318	2.19403	0.936071	0.936071	PLCB2	phospholipase C beta 2
8160441	1.57e-05	4.89e-07	5.63578	5.88233	0.935642	0.935642	CDKN2A	cyclin dependent kinase inhibitor 2A
7982058	0.216	0.073	-1.82451	-5.30377	-0.935403	0.935403	SNORD115-24///SNORD115-44///SNORD115-43///SNORD115-42///SNORD115-41///SNORD115-40///SNORD115-39///SNORD115-38///SNORD115-36///SNORD115-34///SNORD115-31///SNORD115-30///SNORD115-29///SNORD115-26///SNORD115-25///SNORD115-22///SNORD115-21///SNORD115-20///SNORD115-19///SNORD115-18///SNORD115-17///SNORD115-16///SNORD115-15///SNORD115-14///SNORD115-13///SNORD115-12///SNORD115-11///SNORD115-10///SNORD11…	small nucleolar RNA, C/D box 115-24///small nucleolar RNA, C/D box 115-44///small nucleolar RNA, C/D box 115-43///small nucleolar RNA, C/D box 115-42///small nucleolar RNA, C/D box 115-41///small nucleolar RNA, C/D box 115-40///small nucleolar RNA, C/D box 115-39///small nucleolar RNA, C/D box 115-38///small nucleolar RNA, C/D box 115-36///small nucleolar RNA, C/D box 115-34///small nucleolar RNA…
7939056	0.326	0.134	-1.51897	-5.79502	-0.935198	0.935198	BBOX1	gamma-butyrobetaine hydroxylase 1
8157804	0.00535	0.000558	3.64533	-0.89399	0.935106	0.935106	OLFML2A	olfactomedin like 2A
7982938	0.000495	3.1e-05	-4.50557	1.86203	-0.934618	0.934618	TYRO3	TYRO3 protein tyrosine kinase
8072705	0.00238	0.000206	3.95245	0.05168	0.934053	0.934053	RASD2	RASD family member 2
7952339	0.00876	0.00103	-3.44871	-1.47385	-0.933945	0.933945	SNORD14C	small nucleolar RNA, C/D box 14C
7973336	0.000113	5.2e-06	5.00262	3.58583	0.933764	0.933764	MMP14	matrix metallopeptidase 14
8123080	0.00384	0.000371	3.77257	-0.50787	0.93371	0.93371	SYTL3	synaptotagmin like 3
8128939	2.26e-06	4.95e-08	6.23215	8.11849	0.932982	0.932982	TRAF3IP2	TRAF3 interacting protein 2
8114612	0.00286	0.000257	3.88485	-0.16042	0.932972	0.932972	CD14	CD14 molecule
8017927	0.0049	0.0005	-3.67972	-0.79043	-0.932806	0.932806	ABCA9	ATP binding cassette subfamily A member 9
8088371	0.0231	0.00357	-3.03327	-2.62615	-0.932628	0.932628	DNASE1L3	deoxyribonuclease 1 like 3
8065920	0.00194	0.000161	4.02569	0.28385	0.932195	0.932195	FER1L4	fer-1 like family member 4, pseudogene
8123364	0.139	0.0386	2.11436	-4.7641	0.931954	0.931954	CCR6	C-C motif chemokine receptor 6
7942596	0.00039	2.33e-05	4.58622	2.1361	0.931641	0.931641	SERPINH1	serpin family H member 1
7969596	1.63e-08	1.77e-10	-7.66681	13.6399	-0.931519	0.931519	GPC5	glypican 5
8054329	6.15e-08	8.03e-10	7.28383	12.157	0.931206	0.931206	RNF149	ring finger protein 149
8114920	0.0595	0.0124	2.57728	-3.76353	0.930917	0.930917	DPYSL3	dihydropyrimidinase like 3
8078784	0.00175	0.000143	-4.06167	0.39883	-0.929318	0.929318	XYLB	xylulokinase
8054740	9.12e-05	4.05e-06	-5.07061	3.8276	-0.929166	0.929166	PAX8	paired box 8
8161892	0.0084	0.000979	-3.46626	-1.42295	-0.928846	0.928846	GNA14	G protein subunit alpha 14
8024687	3.66e-08	4.39e-10	-7.4369	12.7495	-0.928465	0.928465	TJP3	tight junction protein 3
8154245	0.00608	0.000652	3.59648	-1.03998	0.928457	0.928457	PDCD1LG2	programmed cell death 1 ligand 2
8086344	0.22	0.0749	1.8126	-5.32443	0.928374	0.928374	CX3CR1	C-X3-C motif chemokine receptor 1
8056376	7.95e-06	2.2e-07	-5.84526	6.66122	-0.928351	0.928351	SCN3A	sodium voltage-gated channel alpha subunit 3
8068022	0.0394	0.00714	2.78501	-3.263	0.928209	0.928209	MIR155///MIR155HG	microRNA 155///MIR155 host gene
8129861	1.67e-07	2.53e-09	6.99255	11.0314	0.927435	0.927435	IFNGR1	interferon gamma receptor 1
8062108	0.00113	8.36e-05	4.22008	0.9117	0.927141	0.927141	PROCR	protein C receptor
8084794	3.02e-05	1.09e-06	5.42345	5.10168	0.927111	0.927111	IL1RAP	interleukin 1 receptor accessory protein
8078650	0.000323	1.84e-05	-4.65304	2.3649	-0.926661	0.926661	CTDSPL	CTD small phosphatase like
7995096	0.000209	1.1e-05	4.79671	2.862	0.926614	0.926614	ITGAM	integrin subunit alpha M
8083457	8.14e-06	2.27e-07	5.83707	6.63059	0.925693	0.925693	RAP2B	RAP2B, member of RAS oncogene family
7948364	0.00441	0.000441	3.71916	-0.67094	0.925386	0.925386	MPEG1	macrophage expressed 1
7909689	3.64e-05	1.36e-06	5.36445	4.88649	0.924875	0.924875	SMYD2	SET and MYND domain containing 2
7969414	0.000239	1.28e-05	-4.75402	2.71359	-0.924855	0.924855	KLF5	Kruppel like factor 5
8027938	0.00699	0.00078	-3.53914	-1.20975	-0.924766	0.924766	UPK1A	uroplakin 1A
8103415	0.00226	0.000194	3.97014	0.10752	0.924093	0.924093	FAM198B	family with sequence similarity 198 member B
7954469	0.000138	6.68e-06	-4.93426	3.34411	-0.923725	0.923725	RASSF8	Ras association domain family member 8
7996264	0.00511	0.000527	3.6636	-0.83906	0.923405	0.923405	CDH5	cadherin 5
8008885	0.0454	0.00862	2.71573	-3.43331	0.923394	0.923394	MIR21	microRNA 21
8043945	4.71e-05	1.83e-06	5.28465	4.59679	0.923351	0.923351	MAP4K4	mitogen-activated protein kinase kinase kinase kinase 4
7961142	0.127	0.0344	2.1645	-4.66377	0.92325	0.92325	OLR1	oxidized low density lipoprotein receptor 1
7925757	0.00864	0.00101	-3.45482	-1.45615	-0.923217	0.923217	OR2T35///OR2T2	olfactory receptor family 2 subfamily T member 35///olfactory receptor family 2 subfamily T member 2
7994216	7.76e-06	2.14e-07	-5.85271	6.68904	-0.92277	0.92277	SLC5A11	solute carrier family 5 member 11
7957351	0.0609	0.0128	-2.56539	-3.79125	-0.922113	0.922113	OTOGL	otogelin like
8025103	0.00134	0.000102	4.16171	0.72148	0.921947	0.921947	ADGRE1	adhesion G protein-coupled receptor E1
8164343	0.012	0.00154	-3.31849	-1.84607	-0.921683	0.921683	FAM102A	family with sequence similarity 102 member A
8025828	0.0205	0.00306	-3.08583	-2.48617	-0.920241	0.920241	LDLR	low density lipoprotein receptor
8059878	0.0371	0.00661	-2.81327	-3.19259	-0.919339	0.919339	IQCA1	IQ motif containing with AAA domain 1
8171823	3.34e-06	7.76e-08	-6.11586	7.6782	-0.919084	0.919084	APOO	apolipoprotein O
8068238	3.02e-07	5.02e-09	6.81793	10.3585	0.918788	0.918788	IFNAR2	interferon alpha and beta receptor subunit 2
7961120	0.000293	1.63e-05	4.68653	2.48017	0.918556	0.918556	CLEC7A	C-type lectin domain family 7 member A
7998722	0.109	0.0277	2.25631	-4.47485	0.918335	0.918335	SNORD60	small nucleolar RNA, C/D box 60
8097867	8.98e-07	1.73e-08	6.50177	9.14548	0.917963	0.917963	KIAA0922	KIAA0922
7996318	0.000101	4.57e-06	5.03812	3.71192	0.91693	0.91693	CMTM3	CKLF like MARVEL transmembrane domain containing 3
8084206	0.00668	0.000738	3.55682	-1.15759	0.916847	0.916847	B3GNT5	UDP-GlcNAc:betaGal beta-1,3-N-acetylglucosaminyltransferase 5
8012558	2.3e-06	5.03e-08	6.2281	8.10315	0.916731	0.916731	PIK3R5	phosphoinositide-3-kinase regulatory subunit 5
8116818	0.00226	0.000193	-3.97144	0.11163	-0.916584	0.916584	BMP6///BMP6	bone morphogenetic protein 6///bone morphogenetic protein 6
8148572	0.0366	0.00649	2.81984	-3.17614	0.916258	0.916258	LY6E	lymphocyte antigen 6 complex, locus E
8161884	0.164	0.049	2.00886	-4.96859	0.916016	0.916016	PRUNE2	prune homolog 2
7938035	0.00984	0.0012	3.40115	-1.61092	0.915911	0.915911	TRIM22	tripartite motif containing 22
7921821	0.0452	0.00857	2.71768	-3.42856	0.915872	0.915872	ADAMTS4	ADAM metallopeptidase with thrombospondin type 1 motif 4
7906777	0.015	0.00205	3.22347	-2.11145	0.915383	0.915383	FCGR2B	Fc fragment of IgG receptor IIb
8002778	2.58e-05	8.94e-07	5.47632	5.29515	0.914806	0.914806	MLKL	mixed lineage kinase domain like
8086457	0.026	0.00417	-2.9787	-2.76961	-0.914734	0.914734	CYP8B1	cytochrome P450 family 8 subfamily B member 1
7914950	0.0002	1.04e-05	4.81286	2.9183	0.914697	0.914697	CSF3R	colony stimulating factor 3 receptor
8056943	6.29e-05	2.62e-06	5.18867	4.25038	0.91461	0.91461	LNPK	lunapark, ER junction formation factor
8109120	0.00111	8.17e-05	4.22673	0.93347	0.914268	0.914268	AFAP1L1	actin filament associated protein 1 like 1
7983512	2.89e-06	6.59e-08	6.15797	7.83746	0.914197	0.914197	SQRDL	sulfide quinone reductase-like (yeast)
7982050	0.225	0.0775	-1.79589	-5.35324	-0.913572	0.913572	SNORD115-24///SNORD115-44///SNORD115-43///SNORD115-42///SNORD115-41///SNORD115-40///SNORD115-39///SNORD115-38///SNORD115-36///SNORD115-34///SNORD115-31///SNORD115-29///SNORD115-26///SNORD115-25///SNORD115-22///SNORD115-21///SNORD115-20///SNORD115-19///SNORD115-18///SNORD115-17///SNORD115-16///SNORD115-15///SNORD115-14///SNORD115-13///SNORD115-12///SNORD115-11///SNORD115-10///SNORD115-9///SNORD115…	small nucleolar RNA, C/D box 115-24///small nucleolar RNA, C/D box 115-44///small nucleolar RNA, C/D box 115-43///small nucleolar RNA, C/D box 115-42///small nucleolar RNA, C/D box 115-41///small nucleolar RNA, C/D box 115-40///small nucleolar RNA, C/D box 115-39///small nucleolar RNA, C/D box 115-38///small nucleolar RNA, C/D box 115-36///small nucleolar RNA, C/D box 115-34///small nucleolar RNA…
8099841	0.000156	7.74e-06	4.89379	3.20167	0.913378	0.913378	TLR6	toll like receptor 6
8067040	0.0015	0.000117	4.1209	0.58933	0.913318	0.913318	NFATC2///NFATC2	nuclear factor of activated T-cells 2///nuclear factor of activated T-cells 2
7976443	0.048	0.00928	2.68815	-3.50018	0.913252	0.913252	IFI27	interferon alpha inducible protein 27
8113981	0.00225	0.000192	3.97303	0.11665	0.913228	0.913228	P4HA2	prolyl 4-hydroxylase subunit alpha 2
8019762	1.39e-07	2.03e-09	7.04774	11.2444	0.912653	0.912653	P4HB	prolyl 4-hydroxylase subunit beta
8056545	0.0509	0.01	2.65819	-3.57221	0.912627	0.912627	STK39	serine/threonine kinase 39
8140686	0.252	0.0913	-1.71603	-5.48752	-0.911551	0.911551	SEMA3D	semaphorin 3D
7960177	0.0442	0.00833	-2.72854	-3.40206	-0.910644	0.910644	SLC6A12	solute carrier family 6 member 12
8144322	0.000188	9.62e-06	-4.8337	2.99107	-0.910311	0.910311	MYOM2	myomesin 2
8038899	0.00258	0.000228	3.92165	-0.04523	0.908868	0.908868	FPR1	formyl peptide receptor 1
7955589	0.0857	0.0201	-2.38844	-4.19144	-0.908826	0.908826	NR4A1	nuclear receptor subfamily 4 group A member 1
8164644	0.000119	5.6e-06	4.98231	3.51388	0.908182	0.908182	FAM78A	family with sequence similarity 78 member A
8035456	0.00122	9.1e-05	4.19497	0.8297	0.907865	0.907865	LRRC25	leucine rich repeat containing 25
8072160	0.000664	4.42e-05	-4.40427	1.52118	-0.907812	0.907812	ZNRF3	zinc and ring finger 3
7982004	0.000808	5.58e-05	-4.33747	1.29857	-0.907762	0.907762	SNORD116-28	small nucleolar RNA, C/D box 116-28
8006655	6.94e-07	1.3e-08	-6.57476	9.42481	-0.907583	0.907583	DHRS11	dehydrogenase/reductase 11
8171896	0.0134	0.00177	3.27192	-1.97681	0.907359	0.907359	CXorf21	chromosome X open reading frame 21
7937823	8.3e-08	1.13e-09	-7.19687	11.8206	-0.907162	0.907162	KCNQ1	potassium voltage-gated channel subfamily Q member 1
8059376	0.101	0.025	2.29929	-4.38416	0.906402	0.906402	SERPINE2	serpin family E member 2
7986463	0.00036	2.09e-05	4.61664	2.24005	0.906289	0.906289	LRRK1	leucine rich repeat kinase 1
8164200	0.00778	0.00089	3.49697	-1.33347	0.906287	0.906287	ANGPTL2	angiopoietin like 2
7946781	0.0297	0.00496	-2.91683	-2.92994	-0.906272	0.906272	PLEKHA7	pleckstrin homology domain containing A7
8131326	0.115	0.0298	2.22524	-4.53952	0.906269	0.906269	SLC29A4	solute carrier family 29 member 4
8180374	0.00063	4.14e-05	4.42338	1.5852	0.906039	0.906039	APOBEC3F	apolipoprotein B mRNA editing enzyme catalytic subunit 3F
8100202	0.00301	0.000274	-3.86593	-0.21942	-0.905575	0.905575	CNGA1	cyclic nucleotide gated channel alpha 1
8040053	8.53e-08	1.18e-09	-7.18644	11.7803	-0.90553	0.90553	ALLC	allantoicase
7956395	0.0242	0.00379	3.01236	-2.68135	0.904517	0.904517	NXPH4	neurexophilin 4
8137240	0.0039	0.000379	3.766	-0.52802	0.904416	0.904416	GIMAP7	GTPase, IMAP family member 7
7934334	0.00054	3.44e-05	-4.47585	1.76162	-0.904341	0.904341	CFAP70	cilia and flagella associated protein 70
7957835	0.033	0.00567	2.86892	-3.05234	0.904234	0.904234	NR1H4	nuclear receptor subfamily 1 group H member 4
7956878	0.0106	0.00131	3.37201	-1.69427	0.903811	0.903811	IRAK3	interleukin 1 receptor associated kinase 3
8068353	0.0196	0.0029	-3.10488	-2.43503	-0.903682	0.903682	MRPS6///SLC5A3	mitochondrial ribosomal protein S6///solute carrier family 5 member 3
8101728	0.00425	0.00042	3.73404	-0.62564	0.903318	0.903318	FAM13A	family with sequence similarity 13 member A
7978846	2.38e-06	5.25e-08	6.21689	8.06062	0.902691	0.902691	POLE2	DNA polymerase epsilon 2, accessory subunit
7956301	0.000189	9.68e-06	4.83181	2.98446	0.902646	0.902646	LRP1	LDL receptor related protein 1
8019912	0.00497	0.000508	3.67474	-0.80549	0.902481	0.902481	EMILIN2	elastin microfibril interfacer 2
8063386	0.0162	0.00226	3.18921	-2.20582	0.902458	0.902458	CEBPB	CCAAT/enhancer binding protein beta
8139207	0.104	0.0262	2.27992	-4.42521	0.902119	0.902119	INHBA///INHBA	inhibin beta A subunit///inhibin beta A subunit
8002446	0.0151	0.00207	-3.21915	-2.12339	-0.902087	0.902087	HYDIN	HYDIN, axonemal central pair apparatus protein
8091530	0.0238	0.00372	3.0181	-2.66622	0.90202	0.90202	P2RY12	purinergic receptor P2Y12
8015016	1.69e-11	7.61e-14	-9.65532	21.2624	-0.901251	0.901251	TNS4	tensin 4
7982016	0.231	0.0807	-1.7764	-5.38651	-0.901018	0.901018	SNORD115-24///SNORD115-44///SNORD115-43///SNORD115-42///SNORD115-41///SNORD115-40///SNORD115-39///SNORD115-38///SNORD115-36///SNORD115-34///SNORD115-31///SNORD115-30///SNORD115-29///SNORD115-26///SNORD115-25///SNORD115-22///SNORD115-21///SNORD115-20///SNORD115-19///SNORD115-18///SNORD115-17///SNORD115-16///SNORD115-15///SNORD115-14///SNORD115-13///SNORD115-12///SNORD115-11///SNORD115-10///SNORD11…	small nucleolar RNA, C/D box 115-24///small nucleolar RNA, C/D box 115-44///small nucleolar RNA, C/D box 115-43///small nucleolar RNA, C/D box 115-42///small nucleolar RNA, C/D box 115-41///small nucleolar RNA, C/D box 115-40///small nucleolar RNA, C/D box 115-39///small nucleolar RNA, C/D box 115-38///small nucleolar RNA, C/D box 115-36///small nucleolar RNA, C/D box 115-34///small nucleolar RNA…
7982024	0.231	0.0807	-1.7764	-5.38651	-0.901018	0.901018	SNORD115-24///SNORD115-44///SNORD115-43///SNORD115-42///SNORD115-41///SNORD115-40///SNORD115-39///SNORD115-38///SNORD115-36///SNORD115-34///SNORD115-31///SNORD115-30///SNORD115-29///SNORD115-26///SNORD115-25///SNORD115-22///SNORD115-21///SNORD115-20///SNORD115-19///SNORD115-18///SNORD115-17///SNORD115-16///SNORD115-15///SNORD115-14///SNORD115-13///SNORD115-12///SNORD115-11///SNORD115-10///SNORD11…	small nucleolar RNA, C/D box 115-24///small nucleolar RNA, C/D box 115-44///small nucleolar RNA, C/D box 115-43///small nucleolar RNA, C/D box 115-42///small nucleolar RNA, C/D box 115-41///small nucleolar RNA, C/D box 115-40///small nucleolar RNA, C/D box 115-39///small nucleolar RNA, C/D box 115-38///small nucleolar RNA, C/D box 115-36///small nucleolar RNA, C/D box 115-34///small nucleolar RNA…
7982030	0.231	0.0807	-1.7764	-5.38651	-0.901018	0.901018	SNORD115-24///SNORD115-44///SNORD115-43///SNORD115-42///SNORD115-41///SNORD115-40///SNORD115-39///SNORD115-38///SNORD115-36///SNORD115-34///SNORD115-31///SNORD115-30///SNORD115-29///SNORD115-26///SNORD115-25///SNORD115-22///SNORD115-21///SNORD115-20///SNORD115-19///SNORD115-18///SNORD115-17///SNORD115-16///SNORD115-15///SNORD115-14///SNORD115-13///SNORD115-12///SNORD115-11///SNORD115-10///SNORD11…	small nucleolar RNA, C/D box 115-24///small nucleolar RNA, C/D box 115-44///small nucleolar RNA, C/D box 115-43///small nucleolar RNA, C/D box 115-42///small nucleolar RNA, C/D box 115-41///small nucleolar RNA, C/D box 115-40///small nucleolar RNA, C/D box 115-39///small nucleolar RNA, C/D box 115-38///small nucleolar RNA, C/D box 115-36///small nucleolar RNA, C/D box 115-34///small nucleolar RNA…
7968212	5.04e-05	1.99e-06	-5.26305	4.51861	-0.900865	0.900865	WASF3	WAS protein family member 3
7905929	0.00726	0.000819	3.52361	-1.25544	0.9007	0.9007	EFNA1	ephrin A1
8136095	0.0075	0.000851	-3.51141	-1.29123	-0.900536	0.900536	AHCYL2	adenosylhomocysteinase like 2
8173941	0.000421	2.56e-05	-4.56016	2.04729	-0.899784	0.899784	TSPAN6	tetraspanin 6
8102848	7.72e-06	2.12e-07	5.85496	6.69745	0.899765	0.899765	SETD7	SET domain containing lysine methyltransferase 7
8053025	0.387	0.175	-1.37246	-6.00112	-0.899733	0.899733	NAT8	N-acetyltransferase 8 (putative)
8073104	2.85e-05	1.01e-06	-5.44423	5.17763	-0.89936	0.89936	SYNGR1	synaptogyrin 1
8086689	0.000204	1.06e-05	-4.80616	2.89492	-0.899123	0.899123	MYL3	myosin light chain 3
7964646	1.96e-05	6.38e-07	-5.56561	5.62328	-0.898204	0.898204	PPM1H	protein phosphatase, Mg2+/Mn2+ dependent 1H
7917946	0.337	0.141	1.49231	-5.83396	0.898115	0.898115	PLPPR5	phospholipid phosphatase related 5
7939131	7.14e-05	3.04e-06	-5.14854	4.10624	-0.897144	0.897144	WT1-AS	WT1 antisense RNA
8006608	0.037	0.00657	2.81586	-3.18611	0.897122	0.897122	CCL4L1///CCL4L2///CCL4///CCL4L1	C-C motif chemokine ligand 4 like 1///C-C motif chemokine ligand 4 like 2///C-C motif chemokine ligand 4///C-C motif chemokine ligand 4 like 1
8072798	0.00781	0.000894	3.49549	-1.33779	0.896905	0.896905	CYTH4	cytohesin 4
8101957	0.111	0.0286	-2.24276	-4.50315	-0.896463	0.896463	EMCN	endomucin
8097098	0.0178	0.00255	-3.14868	-2.31653	-0.896382	0.896382	USP53	ubiquitin specific peptidase 53
7972180	6.11e-05	2.52e-06	5.19879	4.2868	0.896266	0.896266	RNF219	ring finger protein 219
8110055	0.000128	6.07e-06	-4.96046	3.43661	-0.896247	0.896247	CPEB4	cytoplasmic polyadenylation element binding protein 4
8174598	0.2	0.0647	-1.88178	-5.2027	-0.896233	0.896233	IL13RA2	interleukin 13 receptor subunit alpha 2
8158147	3.18e-07	5.36e-09	-6.80145	10.2951	-0.896055	0.896055	SLC25A25	solute carrier family 25 member 25
7897449	0.0641	0.0137	2.5385	-3.85354	0.895804	0.895804	SPSB1	splA/ryanodine receptor domain and SOCS box containing 1
8140556	0.00472	0.00048	-3.69266	-0.75131	-0.895436	0.895436	HGF	hepatocyte growth factor
8035838	0.00345	0.000325	3.81342	-0.38218	0.894767	0.894767	ZNF724	zinc finger protein 724
7922200	0.0571	0.0118	-2.59773	-3.71561	-0.894151	0.894151	SELP	selectin P
8170119	0.0646	0.0139	2.5347	-3.86232	0.893847	0.893847	FHL1	four and a half LIM domains 1
7938100	2.31e-06	5.06e-08	-6.22655	8.09726	-0.893728	0.893728	SMPD1	sphingomyelin phosphodiesterase 1
8143127	0.000366	2.14e-05	-4.61065	2.21955	-0.893547	0.893547	FAM180A	family with sequence similarity 180 member A
7908376	0.000744	5.07e-05	4.36528	1.39105	0.89234	0.89234	RGS18	regulator of G-protein signaling 18
7973303	0.131	0.0356	2.14951	-4.69398	0.892298	0.892298	OR6C4	olfactory receptor family 6 subfamily C member 4
7963054	4.08e-05	1.55e-06	5.33026	4.76218	0.892189	0.892189	TUBA1A	tubulin alpha 1a
8142061	0.000154	7.65e-06	4.89691	3.21261	0.892176	0.892176	PUS7	pseudouridylate synthase 7 (putative)
8096875	0.00663	0.000731	3.55982	-1.14873	0.892165	0.892165	ENPEP	glutamyl aminopeptidase
8108733	0.0078	0.000893	3.49608	-1.33607	0.892143	0.892143	PCDHB12	protocadherin beta 12
7908924	0.143	0.0403	-2.09585	-4.80064	-0.891891	0.891891	PRELP	proline and arginine rich end leucine rich repeat protein
7958884	0.0134	0.00178	3.27036	-1.98116	0.891452	0.891452	OAS1	2'-5'-oligoadenylate synthetase 1
8168524	0.141	0.0397	2.10295	-4.78666	0.890836	0.890836	P2RY10	purinergic receptor P2Y10
7982006	0.00494	0.000506	-3.67643	-0.80038	-0.890793	0.890793	SNORD116-29	small nucleolar RNA, C/D box 116-29
8154692	0.0238	0.00373	-3.01772	-2.66723	-0.890623	0.890623	TEK	TEK receptor tyrosine kinase
7963092	1.42e-05	4.35e-07	5.66644	5.99583	0.888733	0.888733	FMNL3	formin like 3
8131179	0.000425	2.59e-05	4.55678	2.03576	0.888669	0.888669	TTYH3	tweety family member 3
8070194	0.0037	0.000355	3.78617	-0.46611	0.888591	0.888591	RUNX1	runt related transcription factor 1
8114814	3.97e-13	1.3e-15	10.7339	25.261	0.888224	0.888224	NR3C1	nuclear receptor subfamily 3 group C member 1
7897803	0.000132	6.32e-06	4.94927	3.39709	0.887515	0.887515	PLOD1	procollagen-lysine,2-oxoglutarate 5-dioxygenase 1
8120067	0.0176	0.00252	-3.1529	-2.30504	-0.887168	0.887168	SLC25A27	solute carrier family 25 member 27
8123598	9.61e-06	2.76e-07	5.78632	6.44124	0.887052	0.887052	SERPINB1	serpin family B member 1
8135218	0.0231	0.00357	3.03264	-2.62783	0.886603	0.886603	LRRC17	leucine rich repeat containing 17
8104663	0.0305	0.00514	2.90415	-2.96248	0.886431	0.886431	CDH6	cadherin 6
8104321	1.03e-05	3e-07	-5.76401	6.35816	-0.886159	0.886159	ADAMTS16	ADAM metallopeptidase with thrombospondin type 1 motif 16
8134907	0.242	0.0862	1.74443	-5.44039	0.886022	0.886022	EPO	erythropoietin
8001423	0.000141	6.88e-06	4.92594	3.31478	0.885729	0.885729	RPGRIP1L	RPGRIP1 like
7996837	0.195	0.0628	-1.89579	-5.17754	-0.885669	0.885669	CDH1	cadherin 1
8138741	0.00623	0.000673	-3.58607	-1.07096	-0.885447	0.885447	HOXA6	homeobox A6
7981728	0.36	0.156	1.43601	-5.91412	0.885334	0.885334	IGHM///IGHV3-48///IGHV3-69-1	immunoglobulin heavy constant mu///immunoglobulin heavy variable 3-48///immunoglobulin heavy variable 3-69-1 (pseudogene)
8112178	9.01e-06	2.56e-07	-5.80526	6.51186	-0.885326	0.885326	LOC100509780	uncharacterized LOC100509780
8033987	0.000291	1.62e-05	4.68863	2.48738	0.884658	0.884658	ICAM3	intercellular adhesion molecule 3
8008682	9.66e-06	2.78e-07	-5.78403	6.43271	-0.884615	0.884615	MSI2	musashi RNA binding protein 2
7954631	0.0012	8.99e-05	4.19854	0.84134	0.884531	0.884531	FAR2	fatty acyl-CoA reductase 2
8003298	0.255	0.0933	1.70507	-5.50552	0.884455	0.884455	SLC7A5	solute carrier family 7 member 5
8093518	0.00417	0.00041	-3.74147	-0.60299	-0.884219	0.884219	FGFR3	fibroblast growth factor receptor 3
8152867	4.32e-06	1.08e-07	6.03077	7.35722	0.883941	0.883941	ASAP1	ArfGAP with SH3 domain, ankyrin repeat and PH domain 1
8009515	0.0392	0.00711	2.78652	-3.25924	0.883483	0.883483	LINC01152	long intergenic non-protein coding RNA 1152
7957221	0.363	0.158	-1.42857	-5.92449	-0.883139	0.883139	TRHDE	thyrotropin releasing hormone degrading enzyme
8001082	0.00559	0.000588	3.62907	-0.94271	0.88275	0.88275	SLC6A10PB///SLC6A10P///SLC6A8	solute carrier family 6 member 8 pseudogene///solute carrier family 6 member 10, pseudogene///solute carrier family 6 member 8
8092251	2e-05	6.56e-07	5.55831	5.59641	0.882395	0.882395	GNB4	G protein subunit beta 4
8072744	0.000896	6.32e-05	4.30154	1.1796	0.882073	0.882073	NCF4	neutrophil cytosolic factor 4
7905028	0.000352	2.04e-05	4.62382	2.26464	0.881659	0.881659	LOC100996732///LOC654342///LOC645166///LSP1	uncharacterized LOC100996732///lymphocyte-specific protein 1 pseudogene///lymphocyte-specific protein 1 pseudogene///lymphocyte-specific protein 1
8096050	0.00059	3.84e-05	-4.44472	1.65683	-0.881415	0.881415	FGF5	fibroblast growth factor 5
8122457	0.000241	1.3e-05	4.75046	2.70124	0.88118	0.88118	STX11	syntaxin 11
7921344	0.0155	0.00214	3.20868	-2.15227	0.881105	0.881105	ELL2	elongation factor for RNA polymerase II 2
7939120	0.000342	1.97e-05	4.63339	2.29745	0.881078	0.881078	RCN1	reticulocalbin 1
8047926	0.0495	0.00969	2.67197	-3.53915	0.880987	0.880987	MAP2	microtubule associated protein 2
8098204	0.127	0.0342	2.16665	-4.65942	0.880853	0.880853	CPE	carboxypeptidase E
8062211	2.75e-05	9.67e-07	5.45548	5.2188	0.880774	0.880774	RPF2	ribosome production factor 2 homolog
8175393	7e-06	1.9e-07	5.88411	6.80649	0.880645	0.880645	ARHGEF6	Rac/Cdc42 guanine nucleotide exchange factor 6
7968344	0.0104	0.00128	3.37994	-1.67163	0.8806	0.8806	ALOX5AP	arachidonate 5-lipoxygenase activating protein
8179228	1.61e-06	3.37e-08	6.33128	8.49515	0.880537	0.880537	TCF19	transcription factor 19
8093826	0.0002	1.04e-05	-4.81257	2.91728	-0.880462	0.880462	ADRA2C	adrenoceptor alpha 2C
8052669	8.62e-06	2.43e-07	5.8188	6.56238	0.880121	0.880121	SERTAD2	SERTA domain containing 2
7976826	0.00705	0.000789	-3.53564	-1.22005	-0.879484	0.879484	SNORD114-26	small nucleolar RNA, C/D box 114-26
8108873	0.000636	4.2e-05	4.41901	1.57056	0.87939	0.87939	ARHGAP26	Rho GTPase activating protein 26
8039212	0.000274	1.52e-05	4.70731	2.55185	0.879161	0.879161	LILRB2	leukocyte immunoglobulin like receptor B2
8094609	1.97e-05	6.42e-07	5.56383	5.61673	0.878968	0.878968	FAM114A1	family with sequence similarity 114 member A1
8107520	0.00049	3.06e-05	4.5094	1.87499	0.878277	0.878277	TNFAIP8	TNF alpha induced protein 8
7975081	2.88e-06	6.54e-08	-6.16007	7.8454	-0.878038	0.878038	PPP1R36	protein phosphatase 1 regulatory subunit 36
7997401	0.0143	0.00194	3.24213	-2.05978	0.87802	0.87802	BCO1	beta-carotene oxygenase 1
8082075	0.000193	9.93e-06	4.82483	2.96008	0.877421	0.877421	DTX3L	deltex E3 ubiquitin ligase 3L
8039196	2.21e-05	7.37e-07	5.52757	5.48329	0.877	0.877	LILRB3	leukocyte immunoglobulin like receptor B3
8019669	6.28e-12	2.54e-14	-9.94249	22.3391	-0.876682	0.876682	GCGR	glucagon receptor
8068898	0.00157	0.000125	4.10188	0.528	0.876583	0.876583	HIST1H2BK///H2BFS///HIST1H2BO///HIST1H2BD	histone cluster 1, H2bk///H2B histone family member S///histone cluster 1, H2bo///histone cluster 1, H2bd
8032509	1.81e-07	2.79e-09	-6.96741	10.9344	-0.876405	0.876405	GNG7	G protein subunit gamma 7
8124537	0.00202	0.000169	4.01234	0.24137	0.876178	0.876178	HIST1H3J	histone cluster 1, H3j
7959408	9.02e-06	2.57e-07	5.80464	6.50954	0.876171	0.876171	KNTC1	kinetochore associated 1
8139680	0.0205	0.00307	-3.08531	-2.48756	-0.87602	0.87602	COBL	cordon-bleu WH2 repeat protein
7935011	0.000431	2.63e-05	-4.55196	2.01938	-0.875948	0.875948	CPEB3	cytoplasmic polyadenylation element binding protein 3
7975203	0.00091	6.43e-05	-4.29646	1.16279	-0.87547	0.87547	MPP5	membrane palmitoylated protein 5
7956097	5.25e-07	9.44e-09	-6.6571	9.74042	-0.875137	0.875137	SUOX	sulfite oxidase
7920839	0.000796	5.47e-05	4.34304	1.31707	0.874963	0.874963	RIT1	Ras like without CAAX 1
8082100	9.36e-05	4.18e-06	5.06233	3.79808	0.874783	0.874783	PARP14	poly(ADP-ribose) polymerase family member 14
8026300	0.000313	1.77e-05	4.66331	2.40022	0.874743	0.874743	ADGRE5	adhesion G protein-coupled receptor E5
8073072	0.0132	0.00175	3.27634	-1.96447	0.874492	0.874492	APOBEC3D	apolipoprotein B mRNA editing enzyme catalytic subunit 3D
8107044	0.00154	0.000122	4.10778	0.547	0.87429	0.87429	ERAP2	endoplasmic reticulum aminopeptidase 2
8173745	0.00277	0.000248	3.89589	-0.12595	0.874142	0.874142	CYSLTR1	cysteinyl leukotriene receptor 1
8018754	0.0114	0.00144	3.34057	-1.78367	0.874079	0.874079	CYGB	cytoglobin
8003204	0.000507	3.2e-05	4.49703	1.83314	0.87351	0.87351	GINS2	GINS complex subunit 2
8103508	0.0161	0.00225	3.19181	-2.19867	0.873425	0.873425	2020-03-01	membrane associated ring-CH-type finger 1
8122634	0.000333	1.91e-05	-4.64232	2.32808	-0.87299	0.87299	SAMD5	sterile alpha motif domain containing 5
7941062	0.283	0.108	-1.6309	-5.62457	-0.872362	0.872362	SLC22A11	solute carrier family 22 member 11
8021286	0.00049	3.06e-05	4.50937	1.87488	0.872258	0.872258	C18orf54	chromosome 18 open reading frame 54
8091511	0.0321	0.00546	2.88231	-3.01827	0.871761	0.871761	P2RY14	purinergic receptor P2Y14
8031293	0.00402	0.000393	3.75493	-0.5619	0.87175	0.87175	KIR2DS2///KIR3DL3///KIR3DS1///KIR3DL2///KIR3DL1///KIR2DS4///KIR2DS1///KIR2DL3///KIR2DL2///KIR2DL1///KIR3DS1///KIR3DL2///KIR3DL1	killer cell immunoglobulin like receptor, two Ig domains and short cytoplasmic tail 2///killer cell immunoglobulin like receptor, three Ig domains and long cytoplasmic tail 3///killer cell immunoglobulin like receptor, three Ig domains and short cytoplasmic tail 1///killer cell immunoglobulin like receptor, three Ig domains and long cytoplasmic tail 2///killer cell immunoglobulin like receptor, t…
8110123	0.0101	0.00124	3.38988	-1.64322	0.870973	0.870973	FAM153C///FAM153A///FAM153B	family with sequence similarity 153, member C///family with sequence similarity 153 member A///family with sequence similarity 153 member B
8039607	1.18e-07	1.7e-09	-7.09375	11.4221	-0.870567	0.870567	ZIM2///PEG3	zinc finger imprinted 2///paternally expressed 3
7973067	0.00041	2.48e-05	-4.56887	2.07693	-0.870542	0.870542	PNP	purine nucleoside phosphorylase
8010248	1.09e-06	2.15e-08	-6.4465	8.93434	-0.87024	0.87024	AFMID	arylformamidase
7951372	7.16e-05	3.05e-06	5.14756	4.10272	0.870176	0.870176	CASP4	caspase 4
7899821	1.3e-06	2.65e-08	-6.3923	8.72757	-0.870121	0.870121	KIAA1522	KIAA1522
8096130	0.0226	0.00346	-3.04366	-2.59864	-0.870014	0.870014	CDS1	CDP-diacylglycerol synthase 1
7995292	0.00532	0.000555	3.64734	-0.88795	0.869242	0.869242	SLC6A10PB///SLC6A10P///SLC6A8	solute carrier family 6 member 8 pseudogene///solute carrier family 6 member 10, pseudogene///solute carrier family 6 member 8
8118594	0.0204	0.00304	3.08857	-2.47884	0.869101	0.869101	HLA-DPB1	major histocompatibility complex, class II, DP beta 1
8082086	0.0164	0.00231	3.18293	-2.22305	0.868568	0.868568	PARP15	poly(ADP-ribose) polymerase family member 15
8165945	4.1e-07	7.1e-09	-6.72971	10.0192	-0.868467	0.868467	CLDN34	claudin 34
7921434	0.0627	0.0133	2.55039	-3.82607	0.868436	0.868436	AIM2	absent in melanoma 2
8081740	1.52e-07	2.26e-09	-7.02054	11.1394	-0.868317	0.868317	ATP6V1A	ATPase H+ transporting V1 subunit A
8086627	3.06e-05	1.11e-06	-5.4192	5.08616	-0.868229	0.868229	ALS2CL	ALS2 C-terminal like
8121510	0.000405	2.44e-05	4.5741	2.09475	0.868147	0.868147	RPF2	ribosome production factor 2 homolog
8097356	0.000497	3.13e-05	4.50333	1.85445	0.867917	0.867917	PLK4	polo like kinase 4
7984743	6.5e-06	1.73e-07	5.90718	6.89291	0.867448	0.867448	CD276	CD276 molecule
8146660	0.00487	0.000497	3.68202	-0.78349	0.867261	0.867261	DNAJC5B	DnaJ heat shock protein family (Hsp40) member C5 beta
8075857	0.00377	0.000363	-3.77949	-0.48662	-0.866691	0.866691	TST	thiosulfate sulfurtransferase
7926223	3.05e-05	1.11e-06	5.41991	5.08874	0.866512	0.866512	CAMK1D	calcium/calmodulin dependent protein kinase ID
7902452	0.0007	4.7e-05	-4.38682	1.46288	-0.866297	0.866297	AK5	adenylate kinase 5
8104314	1.33e-08	1.41e-10	-7.72512	13.8657	-0.866282	0.866282	IRX1	iroquois homeobox 1
8000799	0.000473	2.94e-05	-4.52086	1.91381	-0.866243	0.866243	GDPD3	glycerophosphodiester phosphodiesterase domain containing 3
7956524	2.64e-08	3.05e-10	-7.52933	13.1074	-0.865841	0.865841	PIP4K2C	phosphatidylinositol-5-phosphate 4-kinase type 2 gamma
8118209	0.212	0.0708	-1.83951	-5.27757	-0.865818	0.865818	APOM	apolipoprotein M
8178043	0.212	0.0708	-1.83951	-5.27757	-0.865818	0.865818	APOM	apolipoprotein M
8179291	0.212	0.0708	-1.83951	-5.27757	-0.865818	0.865818	APOM	apolipoprotein M
7987163	0.0235	0.00365	3.02503	-2.64795	0.865804	0.865804	FMN1	formin 1
8009243	0.000806	5.56e-05	4.33846	1.30186	0.865735	0.865735	MILR1///MILR1	mast cell immunoglobulin like receptor 1///mast cell immunoglobulin like receptor 1
8070173	2.28e-10	1.44e-12	-8.8933	18.3696	-0.865298	0.865298	KCNE1	potassium voltage-gated channel subfamily E regulatory subunit 1
7971388	0.00127	9.58e-05	-4.17995	0.78078	-0.86523	0.86523	SLC25A30	solute carrier family 25 member 30
7939052	0.0955	0.0233	-2.32854	-4.3216	-0.865159	0.865159	FIBIN	fin bud initiation factor homolog (zebrafish)
7897877	9.99e-05	4.51e-06	5.04137	3.72347	0.865024	0.865024	TNFRSF1B	TNF receptor superfamily member 1B
7954196	0.00383	0.00037	3.77315	-0.50608	0.864875	0.864875	MGST1	microsomal glutathione S-transferase 1
8156610	0.000317	1.8e-05	-4.65955	2.38726	-0.864106	0.864106	HABP4	hyaluronan binding protein 4
7928736	0.00729	0.000824	3.52166	-1.26116	0.863672	0.863672	NRG3	neuregulin 3
8048995	0.000929	6.61e-05	-4.28828	1.1358	-0.863398	0.863398	ITM2C	integral membrane protein 2C
8105987	0.00847	0.000989	3.46298	-1.43248	0.862897	0.862897	LOC441081	POM121 membrane glycoprotein (rat) pseudogene
8175531	0.177	0.0545	1.96091	-5.05851	0.862707	0.862707	CDR1	cerebellar degeneration related protein 1
7996361	0.289	0.112	1.6132	-5.65226	0.862535	0.862535	CES3	carboxylesterase 3
8056860	1.61e-06	3.37e-08	6.33067	8.49284	0.862359	0.862359	WIPF1	WAS/WASL interacting protein family member 1
8098604	0.00356	0.000337	3.80192	-0.41766	0.862271	0.862271	ANKRD37	ankyrin repeat domain 37
7916853	7.53e-08	1.01e-09	-7.2247	11.9283	-0.861856	0.861856	DIRAS3	DIRAS family GTPase 3
7931930	0.0138	0.00184	-3.25828	-2.01487	-0.861777	0.861777	PRKCQ	protein kinase C theta
7984475	0.00029	1.61e-05	-4.69008	2.4924	-0.861675	0.861675	CORO2B	coronin 2B
7941444	0.0346	0.00604	2.84615	-3.10998	0.861001	0.861001	CTSW	cathepsin W
8091867	0.0271	0.00439	-2.96065	-2.81665	-0.860985	0.860985	BCHE	butyrylcholinesterase
8088848	0.0157	0.00218	-3.20255	-2.16917	-0.860522	0.860522	PDZRN3	PDZ domain containing ring finger 3
8143270	2.99e-05	1.07e-06	5.42791	5.11798	0.86033	0.86033	ZC3HAV1L	zinc finger CCCH-type containing, antiviral 1 like
7926127	0.00516	0.000532	3.66029	-0.84901	0.859749	0.859749	CELF2	CUGBP, Elav-like family member 2
7899499	0.0381	0.00684	2.80119	-3.22275	0.859539	0.859539	RAB42	RAB42, member RAS oncogene family
8171229	0.00671	0.000743	-3.55477	-1.16366	-0.859439	0.859439	PNPLA4	patatin like phospholipase domain containing 4
8111932	0.384	0.173	1.37905	-5.99226	0.858807	0.858807	CCL28	C-C motif chemokine ligand 28
7942372	0.0205	0.00307	3.08544	-2.48722	0.858794	0.858794	FOLR2	folate receptor beta
7952601	4.42e-05	1.69e-06	5.30625	4.67505	0.858399	0.858399	ETS1	ETS proto-oncogene 1, transcription factor
8078971	1.95e-05	6.32e-07	-5.56797	5.63199	-0.858352	0.858352	ENTPD3	ectonucleoside triphosphate diphosphohydrolase 3
7940582	0.00181	0.000148	4.0503	0.36245	0.856878	0.856878	BEST1	bestrophin 1
8115651	9.21e-05	4.1e-06	-5.06735	3.81595	-0.856847	0.856847	GABRB2	gamma-aminobutyric acid type A receptor beta2 subunit
8108679	1.46e-06	3.03e-08	-6.35863	8.59928	-0.856564	0.856564	PCDHB1	protocadherin beta 1
8147206	0.000738	5e-05	4.36892	1.40318	0.856559	0.856559	RIPK2	receptor interacting serine/threonine kinase 2
8148149	0.00111	8.14e-05	4.22759	0.9363	0.856419	0.856419	ZHX2	zinc fingers and homeoboxes 2
8124534	0.0232	0.00359	3.03132	-2.63131	0.856306	0.856306	HIST1H4L	histone cluster 1, H4l
8030007	5.88e-06	1.54e-07	5.93829	7.00957	0.856218	0.856218	EMP3	epithelial membrane protein 3
8159521	0.000356	2.07e-05	-4.61981	2.25092	-0.855802	0.855802	PTGDS	prostaglandin D2 synthase
8118158	0.00618	0.000665	3.58996	-1.05939	0.855678	0.855678	AIF1	allograft inflammatory factor 1
8177996	0.00618	0.000665	3.58996	-1.05939	0.855678	0.855678	AIF1	allograft inflammatory factor 1
8179276	0.00618	0.000665	3.58996	-1.05939	0.855678	0.855678	AIF1	allograft inflammatory factor 1
8054479	0.0503	0.00989	2.66407	-3.55811	0.855547	0.855547	MALL	mal, T-cell differentiation protein like
8172447	3.06e-05	1.11e-06	-5.4192	5.08614	-0.85515	0.85515	PCSK1N	proprotein convertase subtilisin/kexin type 1 inhibitor
8166925	0.27	0.101	-1.66555	-5.56956	-0.855029	0.855029	MAOA	monoamine oxidase A
8065485	4.79e-10	3.41e-12	-8.67272	17.5241	-0.854941	0.854941	NINL	ninein like
8046646	1.92e-05	6.2e-07	-5.57336	5.65185	-0.854861	0.854861	OSBPL6	oxysterol binding protein like 6
8118086	5.46e-06	1.41e-07	5.96165	7.09725	0.854824	0.854824	TCF19	transcription factor 19
8177947	5.46e-06	1.41e-07	5.96165	7.09725	0.854824	0.854824	TCF19	transcription factor 19
8017599	0.000128	6.08e-06	4.95992	3.43468	0.854716	0.854716	PECAM1	platelet and endothelial cell adhesion molecule 1
8103601	5.25e-05	2.11e-06	5.24734	4.46186	0.854257	0.854257	DDX60L	DEAD-box helicase 60-like
8146500	0.00256	0.000226	3.9241	-0.03756	0.854217	0.854217	LYN	LYN proto-oncogene, Src family tyrosine kinase
8060418	5.38e-06	1.37e-07	5.96837	7.1225	0.854024	0.854024	SIRPA	signal regulatory protein alpha
7949588	0.047	0.00902	2.69879	-3.47444	0.853911	0.853911	CD248	CD248 molecule
8108099	5.47e-07	9.87e-09	6.6457	9.69669	0.85363	0.85363	SEC24A	SEC24 homolog A, COPII coat complex component
8019250	2.45e-07	3.97e-09	6.87801	10.5898	0.853246	0.853246	P4HB	prolyl 4-hydroxylase subunit beta
7969192	2.34e-08	2.67e-10	-7.56347	13.2396	-0.8525	0.8525	FAM124A	family with sequence similarity 124 member A
8115397	0.0888	0.021	-2.36943	-4.23305	-0.852436	0.852436	FAXDC2	fatty acid hydroxylase domain containing 2
8087100	2.84e-09	2.47e-11	-8.16769	15.5782	-0.852292	0.852292	UQCRC1	ubiquinol-cytochrome c reductase core protein I
8008646	0.000375	2.21e-05	-4.60156	2.18848	-0.852194	0.852194	SCPEP1	serine carboxypeptidase 1
8063156	0.000113	5.22e-06	5.00142	3.58157	0.852119	0.852119	CD40	CD40 molecule
7949719	0.0302	0.00505	-2.9107	-2.94567	-0.852114	0.852114	PC	pyruvate carboxylase
7908793	0.0759	0.0171	-2.45205	-4.05026	-0.852037	0.852037	ELF3	E74 like ETS transcription factor 3
7901497	0.0585	0.0122	-2.58572	-3.74378	-0.851901	0.851901	ZYG11A	zyg-11 family member A, cell cycle regulator
8155665	0.0172	0.00244	-3.16345	-2.2763	-0.85156	0.85156	PGM5	phosphoglucomutase 5
7958352	0.0117	0.00149	-3.32978	-1.81419	-0.850695	0.850695	BTBD11	BTB domain containing 11
8112519	0.013	0.0017	3.28457	-1.94143	0.850629	0.850629	LOC441081	POM121 membrane glycoprotein (rat) pseudogene
7907830	0.0734	0.0164	2.46971	-4.01052	0.850559	0.850559	QSOX1	quiescin sulfhydryl oxidase 1
8138789	2.44e-07	3.94e-09	6.87951	10.5956	0.85042	0.85042	JAZF1	JAZF zinc finger 1
8062041	0.00287	0.000259	-3.88334	-0.16516	-0.85027	0.85027	ACSS2	acyl-CoA synthetase short-chain family member 2
7939376	7.44e-05	3.18e-06	5.13612	4.06171	0.8498	0.8498	LDLRAD3	low density lipoprotein receptor class A domain containing 3
8147777	0.0264	0.00425	2.97183	-2.78753	0.849637	0.849637	CTHRC1	collagen triple helix repeat containing 1
8088602	0.00141	0.000109	-4.14192	0.65731	-0.849385	0.849385	MAGI1	membrane associated guanylate kinase, WW and PDZ domain containing 1
8175217	0.172	0.0521	-1.98115	-5.02078	-0.849065	0.849065	GPC4	glypican 4
7915229	0.017	0.0024	3.16882	-2.26163	0.848631	0.848631	HEYL	hes related family bHLH transcription factor with YRPW motif-like
8113039	4.98e-05	1.96e-06	5.26656	4.5313	0.848304	0.848304	MEF2C	myocyte enhancer factor 2C
8134351	0.0174	0.00248	-3.15792	-2.29138	-0.8482	0.8482	PPP1R9A	protein phosphatase 1 regulatory subunit 9A
8178220	0.000979	7.04e-05	4.27007	1.07577	0.847809	0.847809	HLA-DPB1	major histocompatibility complex, class II, DP beta 1
7932094	0.021	0.00315	-3.07676	-2.51045	-0.847772	0.847772	PHYH	phytanoyl-CoA 2-hydroxylase
7945377	3.3e-06	7.66e-08	-6.1193	7.69121	-0.847734	0.847734	SIGIRR	single Ig and TIR domain containing
8134036	0.0596	0.0125	-2.57603	-3.76644	-0.847024	0.847024	STEAP2	STEAP2 metalloreductase
8077833	0.0375	0.00669	2.80886	-3.20361	0.846725	0.846725	SLC6A1	solute carrier family 6 member 1
7908351	0.0116	0.00147	-3.33457	-1.80065	-0.846653	0.846653	PLA2G4A	phospholipase A2 group IVA
8026638	4.34e-07	7.55e-09	6.71383	9.95822	0.846579	0.846579	MYO9B	myosin IXB
8111153	0.00162	0.00013	-4.08972	0.48884	-0.845239	0.845239	MYO10	myosin X
8068180	0.000738	5e-05	-4.3691	1.40378	-0.845075	0.845075	HUNK	hormonally up-regulated Neu-associated kinase
7950005	0.000158	7.83e-06	-4.89032	3.18946	-0.845038	0.845038	MRGPRF	MAS related GPR family member F
8155327	0.0146	0.00198	-3.2349	-2.07983	-0.844793	0.844793	ALDH1B1	aldehyde dehydrogenase 1 family member B1
8117580	0.00033	1.89e-05	4.64607	2.34096	0.844577	0.844577	HIST1H2AI	histone cluster 1, H2ai
8120783	0.000768	5.25e-05	-4.35475	1.35602	-0.84437	0.84437	MYO6	myosin VI
8054166	0.00653	0.000718	-3.5656	-1.13165	-0.844241	0.844241	TSGA10///TSGA10	testis specific 10///testis specific 10
7944739	0.0894	0.0212	2.36572	-4.24115	0.844056	0.844056	CRTAM	cytotoxic and regulatory T-cell molecule
8079237	0.00303	0.000276	3.86288	-0.22889	0.843789	0.843789	KIF15	kinesin family member 15
7934945	0.0173	0.00248	-3.1588	-2.28898	-0.843686	0.843686	PANK1	pantothenate kinase 1
8102560	0.000894	6.3e-05	4.30237	1.18233	0.843146	0.843146	MAD2L1	MAD2 mitotic arrest deficient-like 1 (yeast)
7962689	0.00171	0.000138	-4.07203	0.43203	-0.843036	0.843036	VDR	vitamin D (1,25- dihydroxyvitamin D3) receptor
7984779	6.05e-10	4.47e-12	8.60331	17.2574	0.84265	0.84265	PML	promyelocytic leukemia
8081067	0.0534	0.0107	2.63383	-3.63028	0.842482	0.842482	HTR1F	5-hydroxytryptamine receptor 1F
8119132	4.98e-05	1.96e-06	5.26701	4.53294	0.842457	0.842457	FGD2	FYVE, RhoGEF and PH domain containing 2
8130539	0.00975	0.00118	3.40483	-1.60036	0.842061	0.842061	TAGAP	T-cell activation RhoGTPase activating protein
8121319	0.00244	0.000212	-3.94314	0.02233	-0.84179	0.84179	SOBP	sine oculis binding protein homolog
8023415	0.0039	0.000379	3.76621	-0.52737	0.841752	0.841752	TCF4	transcription factor 4
7912692	6.29e-05	2.62e-06	-5.18895	4.25139	-0.841315	0.841315	HSPB7	heat shock protein family B (small) member 7
8106931	0.00612	0.000658	3.5936	-1.04857	0.841205	0.841205	SLF1	SMC5-SMC6 complex localization factor 1
8020878	0.00314	0.000289	3.8493	-0.2711	0.840955	0.840955	MAPRE2	microtubule associated protein RP/EB family member 2
8131844	0.0525	0.0104	2.64363	-3.60697	0.840868	0.840868	GPNMB	glycoprotein nmb
8102998	0.0143	0.00192	-3.24444	-2.05337	-0.840848	0.840848	GYPA	glycophorin A (MNS blood group)
8118111	0.0174	0.00249	3.15666	-2.29481	0.840699	0.840699	HCP5	HLA complex P5 (non-protein coding)
7931852	0.000365	2.13e-05	-4.61166	2.22304	-0.840627	0.840627	TUBAL3	tubulin alpha like 3
7907222	0.229	0.0799	1.7815	-5.37784	0.840423	0.840423	PRRX1	paired related homeobox 1
7981955	0.000743	5.06e-05	-4.36588	1.39304	-0.840387	0.840387	SNORD116-4///SNRPN	small nucleolar RNA, C/D box 116-4///small nuclear ribonucleoprotein polypeptide N
8037374	0.00294	0.000267	3.87362	-0.19545	0.840189	0.840189	PLAUR	plasminogen activator, urokinase receptor
8059955	0.00911	0.00108	-3.43402	-1.51633	-0.840158	0.840158	RAB17	RAB17, member RAS oncogene family
7958895	0.00136	0.000104	4.15559	0.70162	0.839737	0.839737	OAS3	2'-5'-oligoadenylate synthetase 3
8140620	0.0182	0.00263	-3.13844	-2.34434	-0.838859	0.838859	PCLO	piccolo presynaptic cytomatrix protein
7975687	4.84e-07	8.51e-09	-6.68334	9.84113	-0.8387	0.8387	LIN52	lin-52 DREAM MuvB core complex component
7981724	0.367	0.161	1.42011	-5.93622	0.838681	0.838681	SCFV///IGLJ3///IGHM///IGHG1///IGHD///C14orf99///IGHV3-48///IGHV3-69-1	single-chain Fv fragment///immunoglobulin lambda joining 3///immunoglobulin heavy constant mu///immunoglobulin heavy constant gamma 1 (G1m marker)///immunoglobulin heavy constant delta///uncharacterized LOC317730///immunoglobulin heavy variable 3-48///immunoglobulin heavy variable 3-69-1 (pseudogene)
7931951	0.00735	0.000832	3.51874	-1.26974	0.838604	0.838604	SFMBT2	Scm-like with four mbt domains 2
8151711	5.04e-05	1.99e-06	5.26314	4.51893	0.837949	0.837949	NBN	nibrin
7961829	0.00925	0.00111	3.42692	-1.53681	0.837707	0.837707	BCAT1	branched chain amino acid transaminase 1
7950391	2.05e-05	6.77e-07	5.55	5.56579	0.837599	0.837599	PGM2L1	phosphoglucomutase 2 like 1
8115600	0.000779	5.34e-05	4.35013	1.34064	0.8375	0.8375	ZBED8	zinc finger BED-type containing 8
8079772	3.61e-12	1.4e-14	-10.1003	22.9273	-0.836746	0.836746	APEH	acylaminoacyl-peptide hydrolase
8178833	0.0593	0.0124	2.57918	-3.75909	0.836456	0.836456	HLA-DOB	major histocompatibility complex, class II, DO beta
7915926	0.000976	7.01e-05	4.27137	1.08006	0.836139	0.836139	STIL	SCL/TAL1 interrupting locus
7991598	0.000341	1.97e-05	4.63382	2.29893	0.836128	0.836128	SNRPA1	small nuclear ribonucleoprotein polypeptide A'
8097628	0.257	0.0945	-1.69884	-5.51571	-0.836124	0.836124	HHIP	hedgehog interacting protein
7908204	0.0238	0.00372	3.01836	-2.66556	0.836114	0.836114	HMCN1	hemicentin 1
7902127	0.0762	0.0172	-2.44983	-4.05524	-0.836066	0.836066	SGIP1	SH3 domain GRB2 like endophilin interacting protein 1
7911287	0.0549	0.0111	-2.61977	-3.66362	-0.835808	0.835808	OR2G6	olfactory receptor family 2 subfamily G member 6
8017867	0.048	0.00929	-2.68746	-3.50184	-0.835673	0.835673	FAM20A	family with sequence similarity 20 member A
8098041	0.021	0.00316	3.07555	-2.51369	0.835613	0.835613	TMEM144	transmembrane protein 144
8023267	0.047	0.00903	-2.69834	-3.47553	-0.835445	0.835445	MYO5B	myosin VB
7956242	2.1e-07	3.34e-09	-6.92159	10.7577	-0.835364	0.835364	COQ10A	coenzyme Q10A
8107706	0.000138	6.69e-06	4.93366	3.34199	0.834841	0.834841	LMNB1	lamin B1
7928126	7.23e-05	3.08e-06	5.1447	4.09247	0.834737	0.834737	PALD1	phosphatase domain containing, paladin 1
7964660	0.0575	0.0119	-2.5945	-3.7232	-0.834696	0.834696	AVPR1A	arginine vasopressin receptor 1A
8055980	0.0479	0.00927	2.68864	-3.49899	0.834522	0.834522	CYTIP	cytohesin 1 interacting protein
8041225	0.0198	0.00294	-3.1006	-2.44654	-0.834427	0.834427	EHD3	EH domain containing 3
7968126	0.000294	1.64e-05	4.6845	2.47318	0.834361	0.834361	LOC100996732///LOC654342///LOC645166///LSP1	uncharacterized LOC100996732///lymphocyte-specific protein 1 pseudogene///lymphocyte-specific protein 1 pseudogene///lymphocyte-specific protein 1
8070933	0.0909	0.0217	-2.35628	-4.26167	-0.834213	0.834213	FTCD	formimidoyltransferase cyclodeaminase
8084064	0.0178	0.00257	3.14685	-2.32149	0.834178	0.834178	MTHFD2	methylenetetrahydrofolate dehydrogenase (NADP+ dependent) 2, methenyltetrahydrofolate cyclohydrolase
8100758	0.157	0.046	-2.03789	-4.91323	-0.834132	0.834132	UGT2B11///UGT2B17///UGT2B15///UGT2B10///UGT2B7	UDP glucuronosyltransferase family 2 member B11///UDP glucuronosyltransferase family 2 member B17///UDP glucuronosyltransferase family 2 member B15///UDP glucuronosyltransferase family 2 member B10///UDP glucuronosyltransferase family 2 member B7
8160786	0.0033	0.000308	-3.82962	-0.3321	-0.834112	0.834112	KIAA1161	KIAA1161
8135661	1.94e-05	6.26e-07	-5.57064	5.64182	-0.834037	0.834037	CFTR	cystic fibrosis transmembrane conductance regulator
8004255	0.00239	0.000207	3.95105	0.04725	0.833981	0.833981	BCL6B	B-cell CLL/lymphoma 6B
8169294	5.08e-06	1.29e-07	-5.98517	7.18564	-0.833975	0.833975	COL4A5	collagen type IV alpha 5 chain
8055445	1.89e-06	4.02e-08	6.28577	8.32208	0.833751	0.833751	DARS	aspartyl-tRNA synthetase
8138361	1.02e-07	1.44e-09	7.13579	11.5845	0.833512	0.833512	RPL36A-HNRNPH2///RPL36A	RPL36A-HNRNPH2 readthrough///ribosomal protein L36a
7919591	0.00193	0.00016	4.0286	0.29313	0.833106	0.833106	FAM72A///FAM72D///FAM72B	family with sequence similarity 72 member A///family with sequence similarity 72 member D///family with sequence similarity 72 member B
8095566	8.89e-09	8.97e-11	-7.83986	14.31	-0.832794	0.832794	MOB1B	MOB kinase activator 1B
8114797	0.00363	0.000345	3.79468	-0.43995	0.83261	0.83261	SPRY4	sprouty RTK signaling antagonist 4
7942489	0.0306	0.00515	2.90363	-2.9638	0.832584	0.832584	DNAJB13	DnaJ heat shock protein family (Hsp40) member B13
8152264	0.154	0.0445	-2.0519	-4.88627	-0.83223	0.83223	DPYS	dihydropyrimidinase
8138566	0.217	0.0733	1.82283	-5.3067	0.831722	0.831722	IGF2BP3	insulin like growth factor 2 mRNA binding protein 3
8059081	0.405	0.188	-1.33023	-6.05688	-0.83145	0.83145	SLC23A3	solute carrier family 23 member 3
8141140	0.0165	0.00232	3.18059	-2.22944	0.831245	0.831245	DLX5	distal-less homeobox 5
8129231	4.85e-05	1.9e-06	-5.27581	4.56476	-0.831224	0.831224	FAM184A	family with sequence similarity 184 member A
7918913	0.0104	0.00128	-3.37955	-1.67276	-0.830817	0.830817	IGSF3	immunoglobulin superfamily member 3
8036151	0.0697	0.0153	-2.49622	-3.95044	-0.830494	0.830494	HSPB6	heat shock protein family B (small) member 6
7915444	2.62e-05	9.08e-07	5.47218	5.27998	0.830281	0.830281	P3H1	prolyl 3-hydroxylase 1
8175052	0.00876	0.00103	-3.44863	-1.47408	-0.830254	0.830254	AIFM1	apoptosis inducing factor, mitochondria associated 1
8152628	0.00146	0.000113	4.13146	0.62346	0.829983	0.829983	DERL1	derlin 1
8139706	0.00101	7.27e-05	4.26071	1.04497	0.829972	0.829972	SEC61G	Sec61 translocon gamma subunit
7961026	0.0337	0.00582	2.85966	-3.07582	0.829887	0.829887	OVOS///OVOS2	ovostatin///ovostatin 2
8077958	0.000113	5.23e-06	-5.00128	3.58107	-0.829488	0.829488	HDAC11	histone deacetylase 11
8043436	0.385	0.174	1.37668	-5.99545	0.829235	0.829235	IGKC	immunoglobulin kappa constant
8109639	0.00137	0.000105	4.15383	0.69589	0.828938	0.828938	PTTG1	pituitary tumor-transforming 1
7979510	4.32e-07	7.5e-09	-6.71573	9.96551	-0.828603	0.828603	SIX4	SIX homeobox 4
8027002	0.0854	0.02	-2.39014	-4.18773	-0.828593	0.828593	GDF15	growth differentiation factor 15
8051762	0.0142	0.00191	-3.24678	-2.04687	-0.828517	0.828517	SLC8A1	solute carrier family 8 member A1
8054281	0.00131	9.86e-05	-4.17143	0.75306	-0.82843	0.82843	LONRF2	LON peptidase N-terminal domain and ring finger 2
7925929	0.018	0.00261	3.14086	-2.33777	0.828185	0.828185	AKR1C3	aldo-keto reductase family 1, member C3
8016438	0.046	0.00877	-2.70898	-3.44972	-0.828114	0.828114	HOXB2	homeobox B2
8145055	0.000589	3.83e-05	4.44573	1.66021	0.827953	0.827953	BMP1	bone morphogenetic protein 1
8038261	4.9e-06	1.23e-07	5.99569	7.22519	0.82784	0.82784	GYS1	glycogen synthase 1
8011713	0.00135	0.000103	4.15858	0.7113	0.827825	0.827825	CXCL16	C-X-C motif chemokine ligand 16
8084732	0.0747	0.0168	2.4605	-4.03127	0.827824	0.827824	RTP4	receptor transporter protein 4
8161865	0.177	0.0548	1.95867	-5.06266	0.82763	0.82763	PRUNE2	prune homolog 2
7902367	0.0138	0.00184	-3.25869	-2.01372	-0.827534	0.827534	ACADM	acyl-CoA dehydrogenase, C-4 to C-12 straight chain
8103254	0.5	0.267	1.12106	-6.3087	0.827345	0.827345	SFRP2	secreted frizzled related protein 2
8070097	0.00284	0.000256	-3.88684	-0.15421	-0.827288	0.827288	DNAJC28	DnaJ heat shock protein family (Hsp40) member C28
[truncated: 20,196 more rows]
