# Supplementary material for: Prediction and analysis of novel key genes ITGAX, LAPTM5, SERPINE1 in clear cell renal cell carcinoma through bioinformatics analysis
Source: PeerJ. 2021 Apr 20;9:e11272. doi: 10.7717/peerj.11272 (PMC8063882; doi:10.7717/peerj.11272)
Supplement: Supplemental Information 8 — A total of 1,890 DEGs were screened from the GSE68417 among them 726 upregulated and 1,164 downregulated genes were selected. [file peerj-09-11272-s008.xlsx]

## Sheet: 3-GSE68417
ID	adj.P.Val	P.Value	t	B	logFC	Gene.symbol	Gene.title
8040249	2.78e-25	8.35e-30	-28.7216	56.8338	-4.06856	ATP6V1C2	ATPase H+ transporting V1 subunit C2
8070467	3.82e-25	2.29e-29	-28.0239	55.9093	-4.23313	TMPRSS2///LOC285847///FKBP5	transmembrane protease, serine 2///uncharacterized LOC285847///FK506 binding protein 5
8095043	7.43e-24	6.69e-28	-25.8034	52.7925	-1.83482	RASL11B///RASL11B	RAS like family 11 member B///RAS like family 11 member B
8084679	4.15e-22	5.5e-26	-23.1351	48.655	-7.06905	KNG1	kininogen 1
7976488	4.15e-22	6.23e-26	-23.0629	48.5366	-4.47587	SERPINA5	serpin family A member 5
8147145	1.13e-21	2.04e-25	-22.388	47.4108	-5.03821	ATP6V0D2	ATPase H+ transporting V0 subunit d2
8143221	2.91e-21	6.68e-25	-21.7315	46.2837	-5.35572	ATP6V0A4	ATPase H+ transporting V0 subunit a4
7999936	2.91e-21	6.98e-25	-21.7073	46.2414	-7.1643	UMOD	uromodulin
7961524	3.99e-21	1.08e-24	-21.4703	45.8261	-3.12941	ERP27	endoplasmic reticulum protein 27
8156923	7.6e-21	2.28e-24	-21.0674	45.1099	-4.02255	PLPPR1	phospholipid phosphatase related 1
8140984	1.1e-20	3.63e-24	-20.8212	44.6659	-3.43221	HEPACAM2	HEPACAM family member 2
8006655	5.94e-20	2.14e-23	-19.9008	42.9619	-1.98709	DHRS11	dehydrogenase/reductase 11
8169836	9.06e-20	3.54e-23	-19.6465	42.4785	-6.55018	XPNPEP2	X-prolyl aminopeptidase 2
8042537	4.73e-19	1.99e-22	-18.7917	40.8115	-3.89578	ATP6V1B1	ATPase H+ transporting V1 subunit B1
8147273	5.45e-19	2.46e-22	-18.6894	40.6074	-3.41009	SLC26A7	solute carrier family 26 member 7
7898314	7.36e-19	3.54e-22	-18.5132	40.2539	-4.52531	CLCNKB	chloride voltage-gated channel Kb
8044067	9.03e-19	4.61e-22	-18.3862	39.9972	-2.88074	SLC9A4	solute carrier family 9 member A4
8011671	1.2e-18	6.48e-22	-18.2242	39.6675	-2.64344	GGT6	gamma-glutamyltransferase 6
8135915	1.22e-18	6.94e-22	18.1918	39.6011	5.05617	HILPDA	hypoxia inducible lipid droplet associated
8005879	1.28e-18	7.93e-22	-18.1287	39.472	-4.98925	SLC13A2	solute carrier family 13 member 2
8069795	1.28e-18	8.06e-22	-18.121	39.4561	-4.07933	CLDN8	claudin 8
8150428	1.59e-18	1.05e-21	-17.9949	39.1966	-4.77677	SFRP1	secreted frizzled related protein 1
8114805	4.13e-18	2.85e-21	-17.5312	38.2285	-3.5801	FGF1	fibroblast growth factor 1
8103894	4.5e-18	3.24e-21	-17.4718	38.1029	-4.05347	ENPP6	ectonucleotide pyrophosphatase/phosphodiesterase 6
7952617	5.19e-18	3.9e-21	-17.3874	37.9239	-4.58231	KCNJ1	potassium voltage-gated channel subfamily J member 1
8129666	7.43e-18	5.8e-21	-17.206	37.5367	-2.2165	SLC2A12	solute carrier family 2 member 12
7985192	8.28e-18	6.87e-21	-17.1294	37.3723	-2.37703	HYKK	hydroxylysine kinase
7994074	8.28e-18	6.96e-21	-17.123	37.3586	-2.24582	SCNN1B	sodium channel epithelial 1 beta subunit
8110688	9.81e-18	8.54e-21	-17.0308	37.1595	-3.73249	SLC9A3	solute carrier family 9 member A3
8088664	1.03e-17	9.3e-21	-16.9925	37.0768	-1.73987	SUCLG2	succinate-CoA ligase GDP-forming beta subunit
7955290	1.04e-17	9.71e-21	-16.973	37.0344	-3.97495	AQP2	aquaporin 2
7948937	1.34e-17	1.28e-20	-16.8475	36.7616	-6.75112	SLC22A8	solute carrier family 22 member 8
7954208	1.5e-17	1.49e-20	-16.7812	36.6167	-2.67282	PIK3C2G	phosphatidylinositol-4-phosphate 3-kinase catalytic subunit type 2 gamma
8122176	1.52e-17	1.55e-20	-16.7635	36.5781	-3.69729	TCF21	transcription factor 21
7967212	1.76e-17	1.85e-20	-16.6844	36.4044	-6.69612	HPD	4-hydroxyphenylpyruvate dioxygenase
7921533	1.79e-17	1.94e-20	-16.664	36.3596	-3.40487	KCNJ10	potassium voltage-gated channel subfamily J member 10
7901565	1.86e-17	2.07e-20	-16.6356	36.2972	-5.3884	DIO1	deiodinase, iodothyronine type I
8013364	2.14e-17	2.45e-20	-16.5613	36.1332	-4.40015	SLC47A2	solute carrier family 47 member 2
8046020	2.56e-17	3e-20	-16.4711	35.9333	-2.00632	SCN2A	sodium voltage-gated channel alpha subunit 2
8079772	2.73e-17	3.28e-20	-16.4325	35.8475	-1.58507	APEH	acylaminoacyl-peptide hydrolase
8087100	2.75e-17	3.45e-20	-16.4099	35.797	-1.437	UQCRC1	ubiquinol-cytochrome c reductase core protein I
7953936	2.75e-17	3.48e-20	-16.4056	35.7875	-5.51688	TMEM52B	transmembrane protein 52B
8015991	2.75e-17	3.55e-20	-16.397	35.7683	-3.53536	SLC4A1	solute carrier family 4 member 1 (Diego blood group)
8151730	2.79e-17	3.69e-20	-16.3807	35.7321	-7.23379	CALB1	calbindin 1
8084668	2.9e-17	3.92e-20	-16.3543	35.673	-3.83059	HRG	histidine rich glycoprotein
8008321	3.91e-17	5.4e-20	-16.2141	35.359	-4.71624	ACSF2	acyl-CoA synthetase family member 2
7915578	5.85e-17	8.43e-20	-16.0213	34.9233	-1.22276	TMEM53	transmembrane protein 53
7922627	6.57e-17	9.66e-20	-15.9623	34.7892	-5.84772	NPHS2	NPHS2, podocin
7991283	9.08e-17	1.36e-19	-15.8148	34.4522	-3.54423	RHCG	Rh family C glycoprotein
7906079	1.01e-16	1.54e-19	-15.7629	34.3331	-2.97515	RAB25	RAB25, member RAS oncogene family
8082886	1.56e-16	2.48e-19	-15.5612	33.8671	-2.26219	PCCB	propionyl-CoA carboxylase beta subunit
8034084	2.03e-16	3.3e-19	-15.4408	33.5869	-2.34676	AP1M2	adaptor related protein complex 1 mu 2 subunit
7995868	2.16e-16	3.57e-19	-15.407	33.5078	-5.24575	SLC12A3	solute carrier family 12 member 3
8019357	2.25e-16	3.82e-19	-15.3794	33.4431	-3.23186	DCXR	dicarbonyl and L-xylulose reductase
8086451	2.25e-16	3.86e-19	-15.3747	33.4322	-1.24002	HIGD1A	HIG1 hypoxia inducible domain family member 1A
8066757	2.32e-16	4.04e-19	-15.3554	33.3871	-6.0161	SLC13A3	solute carrier family 13 member 3
7979400	2.35e-16	4.16e-19	-15.3427	33.3572	-2.25969	C14orf37	chromosome 14 open reading frame 37
7983564	2.55e-16	4.64e-19	-15.2975	33.2511	-7.43583	SLC12A1	solute carrier family 12 member 1
8054872	2.55e-16	4.67e-19	-15.2949	33.2448	-5.17009	TFCP2L1	transcription factor CP2-like 1
8019778	2.76e-16	5.15e-19	-15.2543	33.1493	-2.36788	PCYT2	phosphate cytidylyltransferase 2, ethanolamine
8028963	2.92e-16	5.52e-19	-15.2256	33.0815	-5.42281	CYP2B6	cytochrome P450 family 2 subfamily B member 6
8086201	3.09e-16	5.93e-19	-15.1954	33.0104	-2.5652	ACAA1	acetyl-CoA acyltransferase 1
8088384	3.94e-16	7.7e-19	-15.0873	32.7541	-1.18993	PDHB	pyruvate dehydrogenase (lipoamide) beta
8019280	4.04e-16	8.01e-19	-15.0709	32.7152	-2.27569	PCYT2	phosphate cytidylyltransferase 2, ethanolamine
7993126	4.85e-16	9.77e-19	-14.9891	32.5203	-3.6744	ABAT	4-aminobutyrate aminotransferase
7916506	6.78e-16	1.38e-18	-14.8461	32.1776	-1.80921	C1orf168	chromosome 1 open reading frame 168
7931204	8.23e-16	1.71e-18	-14.7609	31.9725	-1.63551	LHPP	phospholysine phosphohistidine inorganic pyrophosphate phosphatase
8035083	8.71e-16	1.83e-18	-14.7319	31.9023	-5.31805	CYP4F2	cytochrome P450 family 4 subfamily F member 2
8139488	9.2e-16	1.96e-18	14.7038	31.8344	3.13279	IGFBP3	insulin like growth factor binding protein 3
7940451	1.2e-15	2.58e-18	-14.5924	31.5638	-2.18634	TKFC	triokinase and FMN cyclase
8068684	1.21e-15	2.65e-18	-14.5826	31.5401	-2.09062	FAM3B	family with sequence similarity 3 member B
7901613	1.21e-15	2.69e-18	-14.5763	31.5246	-2.21733	ACOT11	acyl-CoA thioesterase 11
8006005	1.22e-15	2.74e-18	-14.5681	31.5047	-4.77361	PIPOX	pipecolic acid and sarcosine oxidase
8046408	1.23e-15	2.81e-18	14.5582	31.4806	2.65552	PDK1	pyruvate dehydrogenase kinase 1
7955719	1.25e-15	2.88e-18	-14.5487	31.4573	-1.21081	HIGD1A	HIG1 hypoxia inducible domain family member 1A
8080162	1.31e-15	3.08e-18	-14.5213	31.3905	-2.02293	ABHD14A	abhydrolase domain containing 14A
8041570	1.31e-15	3.1e-18	-14.5191	31.3851	-2.11816	TMEM178A	transmembrane protein 178A
8085233	1.31e-15	3.14e-18	-14.514	31.3727	-1.15864	RPUSD3	RNA pseudouridylate synthase domain containing 3
8087634	1.5e-15	3.64e-18	-14.4544	31.2269	-0.888297	TUSC2	tumor suppressor candidate 2
7909285	2.07e-15	5.11e-18	-14.3187	30.8932	-2.49665	PFKFB2	6-phosphofructo-2-kinase/fructose-2,6-biphosphatase 2
8095343	2.11e-15	5.27e-18	-14.3064	30.8628	-2.06864	STAP1	signal transducing adaptor family member 1
8006681	3.19e-15	8.04e-18	-14.1385	30.4463	-1.43167	LHX1	LIM homeobox 1
8175234	3.3e-15	8.42e-18	-14.12	30.4003	-3.98435	GPC3	glypican 3
8010747	3.46e-15	8.93e-18	-14.0969	30.3427	-1.3171	GPS1	G protein pathway suppressor 1
8175844	3.54e-15	9.25e-18	-14.0832	30.3087	-1.10594	IDH3G	isocitrate dehydrogenase 3 (NAD(+)) gamma
7999291	3.88e-15	1.02e-17	-14.0427	30.2074	-2.03259	C16orf89	chromosome 16 open reading frame 89
7961891	3.97e-15	1.06e-17	14.0292	30.1736	2.79115	BHLHE41	basic helix-loop-helix family member e41
8109901	4.01e-15	1.08e-17	-14.0206	30.1521	-1.31605	FOXI1	forkhead box I1
8053366	4.12e-15	1.13e-17	-14.0055	30.1141	-2.31106	SUCLG1	succinate-CoA ligase alpha subunit
7906163	4.58e-15	1.27e-17	-13.9597	29.9992	-2.19547	RHBG	Rh family B glycoprotein (gene/pseudogene)
7919314	4.99e-15	1.39e-17	-13.9217	29.9036	-3.11768	FMO5	flavin containing monooxygenase 5
8080168	5.07e-15	1.43e-17	-13.9118	29.8787	-4.00477	ACY1	aminoacylase 1
8024323	5.24e-15	1.5e-17	-13.8941	29.8343	-2.18465	REEP6	receptor accessory protein 6
8160168	5.35e-15	1.54e-17	-13.882	29.8036	-2.81445	FREM1	FRAS1 related extracellular matrix 1
8010248	5.77e-15	1.68e-17	-13.8486	29.7196	-2.25931	AFMID	arylformamidase
8075838	5.86e-15	1.73e-17	-13.8384	29.6937	-3.33406	PVALB	parvalbumin
8095663	6.01e-15	1.79e-17	-13.8246	29.6588	-5.05386	AFM	afamin
8012247	7.2e-15	2.16e-17	-13.7502	29.4705	-2.04836	SAT2	spermidine/spermine N1-acetyltransferase family member 2
8106689	7.72e-15	2.34e-17	-13.7195	29.3923	-2.53027	CKMT2	creatine kinase, mitochondrial 2
7953532	7.79e-15	2.39e-17	13.7121	29.3735	3.60187	ENO2	enolase 2
8098671	8.08e-15	2.5e-17	-13.694	29.3276	-3.62715	F11	coagulation factor XI
7953943	8.69e-15	2.71e-17	-13.6623	29.2468	-1.58899	GABARAPL1	GABA type A receptor associated protein like 1
8078386	8.78e-15	2.77e-17	-13.6544	29.2267	-1.85647	GPD1L	glycerol-3-phosphate dehydrogenase 1-like
8088397	8.86e-15	2.82e-17	-13.6473	29.2085	-3.2986	ACOX2	acyl-CoA oxidase 2
7995222	8.97e-15	2.88e-17	-13.6388	29.1869	-3.60198	SLC5A2	solute carrier family 5 member 2
8115287	9.04e-15	2.93e-17	-13.6323	29.1703	-6.31729	SLC36A2	solute carrier family 36 member 2
8108483	9.88e-15	3.26e-17	-13.5912	29.0652	-2.0052	SLC4A9	solute carrier family 4 member 9
8088458	9.88e-15	3.26e-17	-13.5911	29.0649	-1.56445	FHIT	fragile histidine triad
7923164	1.03e-14	3.44e-17	-13.5704	29.0121	-1.60755	ATP6V1G3	ATPase H+ transporting V1 subunit G3
7958425	1.11e-14	3.74e-17	-13.5384	28.9301	-4.59232	DAO	D-amino acid oxidase
8159521	1.13e-14	3.84e-17	-13.5283	28.9041	-1.2752	PTGDS	prostaglandin D2 synthase
8158224	1.2e-14	4.1e-17	-13.5032	28.8397	-1.16368	SLC27A4	solute carrier family 27 member 4
8093219	1.22e-14	4.2e-17	-13.4941	28.8163	-1.58633	BDH1	3-hydroxybutyrate dehydrogenase, type 1
8169115	1.31e-14	4.58e-17	-13.4607	28.7304	-2.32963	NRK	Nik related kinase
7928395	1.39e-14	4.9e-17	13.4347	28.6634	1.57114	FUT11	fucosyltransferase 11
7971950	1.49e-14	5.33e-17	-13.4027	28.5809	-2.04706	DACH1	dachshund family transcription factor 1
8053654	1.49e-14	5.36e-17	-13.4006	28.5755	-4.85021	PRDM10///FABP1	PR/SET domain 10///fatty acid binding protein 1
8044080	1.49e-14	5.38e-17	-13.3991	28.5716	-2.07954	SLC9A2	solute carrier family 9 member A2
7899016	1.5e-14	5.46e-17	-13.3933	28.5566	-1.39406	SDHD	succinate dehydrogenase complex subunit D
8119782	1.71e-14	6.26e-17	-13.3411	28.4216	-3.66416	SLC22A7	solute carrier family 22 member 7
8029560	1.72e-14	6.35e-17	-13.3358	28.4079	-1.19157	CLPTM1	CLPTM1, transmembrane protein
8002266	1.82e-14	6.79e-17	-13.3104	28.3421	-1.07796	CHTF8	chromosome transmission fidelity factor 8
8036010	1.82e-14	6.84e-17	-13.3073	28.334	-2.68679	PEPD	peptidase D
8032284	1.99e-14	7.53e-17	-13.2711	28.2399	-1.11693	UQCR11	ubiquinol-cytochrome c reductase, complex III subunit XI
8078147	2.03e-14	7.77e-17	-13.2589	28.2084	-1.65211	BTD	biotinidase
8024273	2.03e-14	7.81e-17	-13.2571	28.2035	-1.09508	NDUFS7	NADH:ubiquinone oxidoreductase core subunit S7
7922152	2.17e-14	8.41e-17	-13.2288	28.13	-0.807264	CCDC181	coiled-coil domain containing 181
8079707	2.54e-14	9.92e-17	-13.1664	27.9671	-0.977634	NDUFAF3	NADH:ubiquinone oxidoreductase complex assembly factor 3
7906703	2.7e-14	1.06e-16	-13.1404	27.8992	-0.888858	NDUFS2	NADH:ubiquinone oxidoreductase core subunit S2
7930148	2.77e-14	1.1e-16	-13.1281	27.8671	-3.20564	SFXN2	sideroflexin 2
7945283	3.18e-14	1.28e-16	-13.0714	27.7186	-1.66021	ACAD8	acyl-CoA dehydrogenase family member 8
8094988	3.18e-14	1.28e-16	-13.0697	27.7142	-2.23645	CWH43	cell wall biogenesis 43 C-terminal homolog
8136940	3.28e-14	1.34e-16	13.0533	27.671	1.87286	TCAF2P1///TCAF2	TRPM8 channel associated factor 2 pseudogene 1///TRPM8 channel associated factor 2
8110347	3.28e-14	1.34e-16	-13.0531	27.6704	-5.8183	SLC34A1	solute carrier family 34 member 1
8016808	3.32e-14	1.36e-16	-13.046	27.6518	-1.62025	CA10	carbonic anhydrase 10
7980096	3.33e-14	1.38e-16	-13.0412	27.6393	-3.09634	ALDH6A1	aldehyde dehydrogenase 6 family member A1
7927155	3.53e-14	1.47e-16	-13.017	27.5756	-2.92567	FXYD4	FXYD domain containing ion transport regulator 4
7932765	3.79e-14	1.59e-16	-12.9879	27.499	-1.90472	MPP7	membrane palmitoylated protein 7
8126820	3.79e-14	1.6e-16	-12.9854	27.4925	-3.91268	ADGRF1	adhesion G protein-coupled receptor F1
8158671	3.86e-14	1.65e-16	-12.9756	27.4666	-3.01818	ASS1	argininosuccinate synthase 1
8153762	4.16e-14	1.79e-16	-12.9447	27.385	-1.32243	SLC39A4	solute carrier family 39 member 4
8084788	4.4e-14	1.9e-16	-12.9213	27.3232	-5.14165	CLDN16	claudin 16
7938100	4.45e-14	1.94e-16	-12.9145	27.3053	-1.43881	SMPD1	sphingomyelin phosphodiesterase 1
7945377	5.22e-14	2.29e-16	-12.8523	27.1404	-1.6387	SIGIRR	single Ig and TIR domain containing
7941946	5.81e-14	2.56e-16	-12.8102	27.0287	-1.43248	NDUFV1	NADH:ubiquinone oxidoreductase core subunit V1
7904433	6.26e-14	2.78e-16	-12.7799	26.9482	-3.32948	PHGDH	phosphoglycerate dehydrogenase
8026982	6.29e-14	2.82e-16	-12.7751	26.9355	-0.810358	MPV17L2	MPV17 mitochondrial inner membrane protein like 2
8107764	6.37e-14	2.87e-16	-12.7683	26.9173	-4.09857	CTXN3	cortexin 3
8096845	6.43e-14	2.92e-16	-12.7623	26.9012	-4.48037	EGF	epidermal growth factor
7925876	6.58e-14	3.01e-16	12.7503	26.8694	2.27842	PFKP	phosphofructokinase, platelet
7936050	6.58e-14	3.02e-16	-12.749	26.8658	-3.74143	CYP17A1	cytochrome P450 family 17 subfamily A member 1
7915472	6.66e-14	3.08e-16	12.7419	26.8469	2.46518	SLC2A1	solute carrier family 2 member 1
8010770	6.9e-14	3.21e-16	12.7261	26.8048	1.58004	SLC16A3	solute carrier family 16 member 3
7967624	7.17e-14	3.36e-16	12.7099	26.7615	1.91874	SLC15A4	solute carrier family 15 member 4
7904254	7.34e-14	3.46e-16	-12.6987	26.7317	-1.54704	ATP1A1	ATPase Na+/K+ transporting subunit alpha 1
8099368	7.64e-14	3.63e-16	-12.6814	26.6853	-1.74033	CLNK	cytokine dependent hematopoietic cell linker
8079311	7.85e-14	3.77e-16	-12.6668	26.6464	-1.13802	LARS2	leucyl-tRNA synthetase 2, mitochondrial
7973530	8.75e-14	4.23e-16	-12.6244	26.5327	-3.46213	PCK2	phosphoenolpyruvate carboxykinase 2, mitochondrial
8062041	9.21e-14	4.48e-16	-12.6034	26.4763	-1.8322	ACSS2	acyl-CoA synthetase short-chain family member 2
7973067	9.27e-14	4.54e-16	-12.5986	26.4635	-1.7417	PNP	purine nucleoside phosphorylase
8009929	9.52e-14	4.69e-16	-12.5867	26.4316	-1.28225	SMIM5	small integral membrane protein 5
8171823	1.03e-13	5.15e-16	-12.5521	26.3383	-1.48632	APOO	apolipoprotein O
7990757	1.06e-13	5.3e-16	-12.5412	26.3091	-1.95254	CTSH	cathepsin H
7978544	1.07e-13	5.41e-16	12.5337	26.2888	3.67082	EGLN3	egl-9 family hypoxia inducible factor 3
8029950	1.09e-13	5.52e-16	12.5263	26.2689	1.71086	EHD2	EH domain containing 2
8034843	1.17e-13	5.98e-16	-12.4973	26.1906	-1.11203	NDUFB7	NADH:ubiquinone oxidoreductase subunit B7
7972428	1.25e-13	6.41e-16	-12.4717	26.1216	-1.30972	OXGR1	oxoglutarate receptor 1
8123303	1.27e-13	6.58e-16	-12.4624	26.0964	-2.09797	PACRG	PARK2 coregulated
7941148	1.32e-13	6.87e-16	-12.4464	26.0532	-1.50117	TM7SF2	transmembrane 7 superfamily member 2
8068651	1.32e-13	6.92e-16	-12.4436	26.0455	-2.04935	PCP4	Purkinje cell protein 4
8136954	1.41e-13	7.43e-16	12.4178	25.9759	1.83084	TCAF2P1///TCAF2	TRPM8 channel associated factor 2 pseudogene 1///TRPM8 channel associated factor 2
8079433	1.5e-13	7.91e-16	-12.3947	25.9132	-3.37491	PTH1R	parathyroid hormone 1 receptor
8080121	1.56e-13	8.3e-16	-12.3772	25.8657	-0.924002	TEX264	testis expressed 264
8111569	1.73e-13	9.25e-16	-12.3377	25.7583	-3.45512	RANBP3L	RAN binding protein 3 like
7973545	1.79e-13	9.6e-16	-12.3242	25.7216	-1.49997	DCAF11	DDB1 and CUL4 associated factor 11
8072436	1.81e-13	9.78e-16	-12.3175	25.7033	-1.42976	INPP5J	inositol polyphosphate-5-phosphatase J
8096116	1.81e-13	9.85e-16	-12.3149	25.6962	-3.55328	GPAT3	glycerol-3-phosphate acyltransferase 3
8101893	2.28e-13	1.25e-15	-12.228	25.4592	-2.73538	ADH1C	alcohol dehydrogenase 1C (class I), gamma polypeptide
8023063	2.28e-13	1.25e-15	-12.2278	25.4585	-1.2931	ATP5A1	ATP synthase, H+ transporting, mitochondrial F1 complex, alpha subunit 1, cardiac muscle
7917080	2.28e-13	1.26e-15	-12.2249	25.4506	-1.02871	DLSTP1	dihydrolipoamide S-succinyltransferase pseudogene 1
8163509	2.29e-13	1.27e-15	-12.2222	25.4433	-2.16411	ALAD	aminolevulinate dehydratase
8002830	2.34e-13	1.31e-15	-12.2123	25.4162	-2.70025	LDHD	lactate dehydrogenase D
8169640	2.52e-13	1.41e-15	-12.1837	25.3379	-1.31344	SLC25A5	solute carrier family 25 member 5
7898300	2.52e-13	1.42e-15	-12.1816	25.332	-3.14985	CLCNKA	chloride voltage-gated channel Ka
8087419	2.57e-13	1.46e-15	-12.173	25.3085	-1.48795	AMT///AMT	aminomethyltransferase///aminomethyltransferase
7937217	2.59e-13	1.48e-15	-12.1675	25.2935	-2.0189	ECHS1	enoyl-CoA hydratase, short chain 1
8122744	2.59e-13	1.49e-15	-12.166	25.2894	-3.18778	IYD	iodotyrosine deiodinase
8079796	2.62e-13	1.51e-15	-12.1602	25.2735	-1.04235	RNF123	ring finger protein 123
8119052	2.78e-13	1.61e-15	-12.1363	25.2078	-1.62673	PNPLA1	patatin like phospholipase domain containing 1
8112649	3.07e-13	1.79e-15	-12.099	25.1055	-1.77363	FAM169A	family with sequence similarity 169 member A
8096753	3.11e-13	1.82e-15	-12.0924	25.0871	-1.98232	HADH	hydroxyacyl-CoA dehydrogenase
7919984	3.12e-13	1.84e-15	-12.0894	25.079	-2.68121	SELENBP1	selenium binding protein 1
8172447	3.14e-13	1.86e-15	-12.085	25.0669	-1.87103	PCSK1N	proprotein convertase subtilisin/kexin type 1 inhibitor
7980098	3.31e-13	1.97e-15	-12.0646	25.0105	-3.5816	ALDH6A1	aldehyde dehydrogenase 6 family member A1
8087885	3.41e-13	2.04e-15	-12.0521	24.9763	-0.903305	BAP1	BRCA1 associated protein 1
8132031	3.43e-13	2.06e-15	-12.0487	24.9667	-1.05215	PRR15	proline rich 15
7943620	3.51e-13	2.12e-15	12.0382	24.9379	1.14038	ATM	ATM serine/threonine kinase
7915971	3.86e-13	2.34e-15	-12.0027	24.8397	-0.735634	AGBL4	ATP/GTP binding protein like 4
7976816	4.25e-13	2.59e-15	-11.9663	24.7391	-3.57806	SNORD114-3	small nucleolar RNA, C/D box 114-3
7986293	4.26e-13	2.61e-15	11.9639	24.7323	1.67679	MCTP2	multiple C2 and transmembrane domain containing 2
7900192	4.31e-13	2.65e-15	-11.9578	24.7155	-0.743931	C1orf122	chromosome 1 open reading frame 122
8080773	4.35e-13	2.69e-15	-11.9526	24.701	-0.979539	RPP14	ribonuclease P/MRP subunit p14
8155327	4.39e-13	2.73e-15	-11.9473	24.6864	-2.31502	ALDH1B1	aldehyde dehydrogenase 1 family member B1
8087119	4.42e-13	2.76e-15	-11.9434	24.6756	-1.6495	SLC26A6	solute carrier family 26 member 6
8001477	4.57e-13	2.87e-15	-11.9292	24.6361	-0.960889	AMFR	autocrine motility factor receptor
7930980	4.57e-13	2.88e-15	-11.9278	24.6323	-2.5948	PLPP4	phospholipid phosphatase 4
7985757	4.85e-13	3.07e-15	-11.9049	24.5689	-0.88311	MRPS11	mitochondrial ribosomal protein S11
7997962	5.08e-13	3.24e-15	-11.8862	24.5169	-5.56625	DPEP1	dipeptidase 1 (renal)
8068883	5.08e-13	3.25e-15	-11.8849	24.5133	-3.03111	LOC102724652///CRYAA	alpha-crystallin A chain///crystallin alpha A
7943998	5.12e-13	3.29e-15	11.8806	24.5014	3.41928	NNMT	nicotinamide N-methyltransferase
8158431	5.53e-13	3.59e-15	-11.8497	24.4154	-2.53312	PHYHD1	phytanoyl-CoA dioxygenase domain containing 1
7950128	5.53e-13	3.61e-15	-11.848	24.4106	-1.16421	ANAPC15	anaphase promoting complex subunit 15
8077270	5.75e-13	3.76e-15	-11.8329	24.3686	-3.6147	CHL1	cell adhesion molecule L1 like
8088866	5.78e-13	3.8e-15	-11.829	24.3578	-2.11995	CNTN3	contactin 3
8038577	6.26e-13	4.13e-15	-11.7996	24.2756	-1.7837	ASPDH	aspartate dehydrogenase domain containing
8115562	6.72e-13	4.46e-15	11.7726	24.2003	1.17626	RNF145	ring finger protein 145
8007429	6.76e-13	4.53e-15	-11.7671	24.1847	-5.07443	G6PC	glucose-6-phosphatase catalytic subunit
8117034	6.76e-13	4.54e-15	-11.7661	24.1821	-2.26655	GMPR	guanosine monophosphate reductase
7975687	6.76e-13	4.55e-15	-11.7655	24.1805	-1.65844	LIN52	lin-52 DREAM MuvB core complex component
7964388	6.76e-13	4.57e-15	11.7642	24.1767	2.95332	NDUFA4L2	NDUFA4, mitochondrial complex associated like 2
8156393	6.8e-13	4.62e-15	-11.7603	24.1658	-1.18286	SUSD3	sushi domain containing 3
7929664	6.96e-13	4.75e-15	-11.7506	24.1386	-2.74307	HOGA1	4-hydroxy-2-oxoglutarate aldolase 1
8018558	7.34e-13	5.02e-15	-11.7305	24.0824	-1.58844	ACOX1	acyl-CoA oxidase 1
7940698	7.65e-13	5.26e-15	-11.714	24.0362	-0.940584	TAF6L	TATA-box binding protein associated factor 6 like
7916412	8.01e-13	5.56e-15	-11.6945	23.9816	-3.98927	FAM151A	family with sequence similarity 151 member A
7938777	8.14e-13	5.67e-15	11.6873	23.9613	1.21385	LDHA	lactate dehydrogenase A
8036155	8.26e-13	5.78e-15	-11.6807	23.9427	-3.84914	PRODH2	proline dehydrogenase 2
8026090	8.27e-13	5.81e-15	-11.679	23.938	-1.62785	GCDH	glutaryl-CoA dehydrogenase
7940717	8.4e-13	5.93e-15	-11.6719	23.9183	-1.53162	SLC3A2	solute carrier family 3 member 2
8069026	8.65e-13	6.16e-15	-11.6585	23.8805	-1.69	C21orf33	chromosome 21 open reading frame 33
7959002	8.88e-13	6.35e-15	-11.6476	23.85	-1.20889	SDSL	serine dehydratase like
8132465	8.9e-13	6.39e-15	-11.6453	23.8434	-3.15656	HECW1	HECT, C2 and WW domain containing E3 ubiquitin protein ligase 1
7926105	9.93e-13	7.16e-15	-11.6055	23.7315	-2.28232	GATA3	GATA binding protein 3
8079563	1.12e-12	8.11e-15	-11.5614	23.607	-0.723134	DHX30	DEAH-box helicase 30
8043522	1.13e-12	8.18e-15	-11.5586	23.599	-1.94279	PROM2	prominin 2
7913858	1.2e-12	8.78e-15	-11.5337	23.5288	-1.29868	PAQR7	progestin and adipoQ receptor family member 7
8003850	1.23e-12	9.03e-15	-11.5236	23.5003	-1.34694	CYB5D2	cytochrome b5 domain containing 2
8138224	1.26e-12	9.29e-15	-11.5139	23.4727	-1.24367	NDUFA4	NDUFA4, mitochondrial complex associated
8120961	1.27e-12	9.35e-15	-11.5115	23.4659	-0.880382	MRAP2	melanocortin 2 receptor accessory protein 2
7947156	1.29e-12	9.57e-15	-11.5035	23.4432	-3.5861	MUC15	mucin 15, cell surface associated
7939738	1.3e-12	9.67e-15	11.4998	23.4329	1.58889	DDB2	damage specific DNA binding protein 2
7977933	1.31e-12	9.83e-15	-11.4941	23.4167	-3.75176	SLC7A8	solute carrier family 7 member 8
7908388	1.32e-12	9.9e-15	11.4914	23.409	2.789	RGS1	regulator of G-protein signaling 1
8135587	1.59e-12	1.2e-14	11.424	23.2177	2.09111	CAV2///LOC105375463///CAV2	caveolin 2///uncharacterized LOC105375463///caveolin 2
8104074	1.61e-12	1.22e-14	-11.4182	23.2013	-2.77583	MTNR1A	melatonin receptor 1A
8040419	1.71e-12	1.3e-14	-11.3967	23.1404	-1.35024	MYCN	v-myc avian myelocytomatosis viral oncogene neuroblastoma derived homolog
8045848	1.81e-12	1.38e-14	-11.3759	23.0809	-3.73237	UPP2	uridine phosphorylase 2
8158513	1.91e-12	1.46e-14	-11.3547	23.0208	-0.806331	DOLPP1	dolichyldiphosphatase 1
7924309	2.09e-12	1.61e-14	-11.3219	22.9272	-3.09228	ESRRG	estrogen related receptor gamma
7987815	2.1e-12	1.62e-14	-11.3198	22.921	-1.41059	PLA2G4F	phospholipase A2 group IVF
8123259	2.27e-12	1.76e-14	-11.2907	22.838	-5.62956	PLG	plasminogen
7924058	2.27e-12	1.77e-14	-11.2897	22.835	-2.23562	IRF6	interferon regulatory factor 6
8102938	2.29e-12	1.79e-14	-11.2859	22.8242	-2.22275	RNF150	ring finger protein 150
8026456	2.44e-12	1.91e-14	-11.2628	22.758	-3.36697	CYP4F3	cytochrome P450 family 4 subfamily F member 3
8086899	2.53e-12	1.99e-14	-11.2484	22.7168	-0.842283	NME6	NME/NM23 nucleoside diphosphate kinase 6
8085608	2.53e-12	2e-14	-11.2463	22.7108	-1.03901	HACL1	2-hydroxyacyl-CoA lyase 1
8007188	2.56e-12	2.03e-14	-11.2412	22.6964	-1.04412	CNP	2',3'-cyclic nucleotide 3' phosphodiesterase
8073705	2.73e-12	2.18e-14	-11.2176	22.6286	-0.852903	PRR5-ARHGAP8///PRR5///ARHGAP8	PRR5-ARHGAP8 readthrough///proline rich 5///Rho GTPase activating protein 8
8021199	2.85e-12	2.27e-14	-11.2022	22.5842	-1.24443	MAPK4	mitogen-activated protein kinase 4
8026024	2.99e-12	2.4e-14	-11.1839	22.532	-0.793529	ASNA1	arsA arsenite transporter, ATP-binding, homolog 1 (bacterial)
8108873	3e-12	2.42e-14	11.1806	22.5225	1.36997	ARHGAP26	Rho GTPase activating protein 26
8037853	3.12e-12	2.53e-14	-11.1659	22.4801	-0.793195	TMEM160	transmembrane protein 160
7952086	3.25e-12	2.65e-14	-11.15	22.4343	-2.60239	TREH	trehalase
7978107	3.31e-12	2.71e-14	-11.1415	22.41	-0.543444	NRL	neural retina leucine zipper
8094372	3.33e-12	2.74e-14	-11.1378	22.3991	-1.45714	SOD3	superoxide dismutase 3, extracellular
8106176	3.53e-12	2.92e-14	-11.1162	22.3371	-3.5938	TMEM174	transmembrane protein 174
8087308	3.55e-12	2.94e-14	-11.1135	22.3291	-0.856297	USP19	ubiquitin specific peptidase 19
8120194	3.62e-12	3.01e-14	-11.1052	22.3052	-2.28406	TFAP2B	transcription factor AP-2 beta
7922598	3.74e-12	3.12e-14	-11.0928	22.2696	-2.08073	ANGPTL1	angiopoietin like 1
8026724	3.74e-12	3.14e-14	-11.0914	22.2655	-0.928798	MRPL34	mitochondrial ribosomal protein L34
7899057	3.98e-12	3.34e-14	-11.0692	22.2014	-1.16629	MTFR1L	mitochondrial fission regulator 1 like
8114119	4.02e-12	3.39e-14	-11.0645	22.1877	-1.29277	FSTL4	follistatin like 4
7994216	4.08e-12	3.46e-14	-11.058	22.169	-1.75022	SLC5A11	solute carrier family 5 member 11
8137485	4.15e-12	3.52e-14	-11.0514	22.1499	-1.35429	DPP6	dipeptidyl peptidase like 6
8177964	4.26e-12	3.65e-14	-11.0389	22.1137	-2.08632	MCCD1	mitochondrial coiled-coil domain 1
8179246	4.26e-12	3.65e-14	-11.0389	22.1137	-2.08632	MCCD1	mitochondrial coiled-coil domain 1
8074020	4.26e-12	3.66e-14	-11.038	22.1113	-0.833989	SELO	selenoprotein O
7961693	4.48e-12	3.86e-14	-11.0198	22.0585	-1.57261	LDHB	lactate dehydrogenase B
8025402	4.61e-12	3.99e-14	11.0091	22.0274	4.3376	ANGPTL4	angiopoietin like 4
8086457	4.77e-12	4.14e-14	-10.9964	21.9907	-2.42333	CYP8B1	cytochrome P450 family 8 subfamily B member 1
8075857	4.78e-12	4.17e-14	-10.9939	21.9834	-2.54437	TST	thiosulfate sulfurtransferase
8001197	4.89e-12	4.27e-14	10.9852	21.9581	3.22824	NETO2	neuropilin and tolloid like 2
8071691	4.97e-12	4.36e-14	-10.9785	21.9389	-1.00334	BCR	BCR, RhoGEF and GTPase activating protein
8172905	5.2e-12	4.58e-14	-10.9618	21.8902	-1.01803	HSD17B10	hydroxysteroid 17-beta dehydrogenase 10
8115022	5.43e-12	4.8e-14	10.9456	21.8432	0.7049	CSNK1A1	casein kinase 1 alpha 1
8084232	5.48e-12	4.86e-14	10.9415	21.8314	1.49897	YEATS2	YEATS domain containing 2
8110841	5.59e-12	4.97e-14	10.9335	21.8083	2.26099	LPCAT1	lysophosphatidylcholine acyltransferase 1
7949679	5.84e-12	5.21e-14	-10.9174	21.7613	-2.48931	SPTBN2	spectrin beta, non-erythrocytic 2
8086185	5.9e-12	5.3e-14	-10.9116	21.7444	-1.22069	PLCD1	phospholipase C delta 1
7900922	5.93e-12	5.34e-14	-10.9091	21.7371	-0.98224	ATP6V0B	ATPase H+ transporting V0 subunit b
8011747	6.09e-12	5.51e-14	-10.8984	21.7061	-1.42012	SLC25A11	solute carrier family 25 member 11
7976000	6.25e-12	5.67e-14	-10.8886	21.6775	-0.763217	ADCK1	aarF domain containing kinase 1
7913609	6.6e-12	6.06e-14	-10.8661	21.6119	-0.743137	ASAP3	ArfGAP with SH3 domain, ankyrin repeat and PH domain 3
7931168	6.6e-12	6.07e-14	-10.8655	21.6102	-2.60038	ACADSB	acyl-CoA dehydrogenase, short/branched chain
8170695	6.6e-12	6.08e-14	-10.865	21.6088	-1.44374	DUSP9	dual specificity phosphatase 9
8016552	6.6e-12	6.08e-14	-10.8648	21.6081	-1.15323	PHB	prohibitin
8078898	6.6e-12	6.09e-14	-10.8645	21.6072	-0.783282	SLC25A38	solute carrier family 25 member 38
8001830	6.73e-12	6.23e-14	-10.8566	21.5843	-1.55146	CMTM4	CKLF like MARVEL transmembrane domain containing 4
7956524	7.08e-12	6.57e-14	-10.8386	21.5317	-1.06624	PIP4K2C	phosphatidylinositol-5-phosphate 4-kinase type 2 gamma
7918936	7.15e-12	6.67e-14	-10.8332	21.5159	-3.07915	VTCN1	V-set domain containing T cell activation inhibitor 1
7955055	7.15e-12	6.68e-14	-10.8328	21.5148	-1.08104	SLC48A1	solute carrier family 48 member 1
8098924	7.45e-12	6.98e-14	-10.8179	21.4713	-1.08557	LETM1	leucine zipper and EF-hand containing transmembrane protein 1
7899346	7.65e-12	7.19e-14	-10.8077	21.4413	-1.05712	TMA7	translation machinery associated 7 homolog
8013120	7.96e-12	7.51e-14	-10.7931	21.3986	-0.994611	PEMT	phosphatidylethanolamine N-methyltransferase
8168691	8.13e-12	7.69e-14	10.785	21.375	1.67239	DIAPH2	diaphanous related formin 2
7926368	8.9e-12	8.45e-14	10.753	21.2814	1.49539	VIM	vimentin
7967993	8.93e-12	8.5e-14	-10.7511	21.2758	-3.17361	FGF9	fibroblast growth factor 9
8147351	9.07e-12	8.66e-14	-10.7446	21.2568	-2.40642	ESRP1///RAF1	epithelial splicing regulatory protein 1///Raf-1 proto-oncogene, serine/threonine kinase
8098789	9.14e-12	8.76e-14	-10.741	21.246	-0.659448	GAK	cyclin G associated kinase
8113881	9.84e-12	9.52e-14	10.7125	21.1624	0.830182	RAPGEF6	Rap guanine nucleotide exchange factor 6
8015900	9.84e-12	9.54e-14	-10.7118	21.1603	-1.11233	TMEM101	transmembrane protein 101
7994058	1.05e-11	1.02e-13	-10.6899	21.0962	-4.23012	SCNN1G	sodium channel epithelial 1 gamma subunit
8015545	1.15e-11	1.12e-13	-10.6565	20.9979	-0.731843	RAB5C	RAB5C, member RAS oncogene family
7966779	1.16e-11	1.14e-13	-10.6529	20.9874	-1.60238	NOS1	nitric oxide synthase 1
8106418	1.16e-11	1.14e-13	-10.6506	20.9806	-3.32283	CRHBP	corticotropin releasing hormone binding protein
7928752	1.18e-11	1.16e-13	-10.6456	20.9659	-1.07068	GHITM	growth hormone inducible transmembrane protein
8038683	1.19e-11	1.18e-13	-10.6406	20.951	-1.59862	KLK6	kallikrein related peptidase 6
7929012	1.2e-11	1.19e-13	10.6379	20.943	1.75312	STAMBPL1	STAM binding protein like 1
8120860	1.21e-11	1.2e-13	-10.6335	20.9302	-1.3184	BCKDHB	branched chain keto acid dehydrogenase E1 subunit beta
7975602	1.21e-11	1.21e-13	-10.6325	20.9273	-2.36029	ACOT2	acyl-CoA thioesterase 2
8158406	1.23e-11	1.23e-13	-10.6252	20.9057	-1.42723	TBC1D13	TBC1 domain family member 13
7947274	1.27e-11	1.27e-13	-10.6151	20.8758	-2.10005	MPPED2	metallophosphoesterase domain containing 2
7990269	1.32e-11	1.32e-13	-10.6015	20.8357	-0.869534	C15orf59	chromosome 15 open reading frame 59
7913896	1.33e-11	1.34e-13	-10.5978	20.825	-2.23205	SLC30A2	solute carrier family 30 member 2
8066598	1.37e-11	1.39e-13	-10.5849	20.7866	-0.990828	ACOT8	acyl-CoA thioesterase 8
7912975	1.43e-11	1.45e-13	-10.5712	20.7463	-3.35012	ALDH4A1	aldehyde dehydrogenase 4 family member A1
8000890	1.43e-11	1.46e-13	-10.5691	20.7402	-1.4075	SEPHS2	selenophosphate synthetase 2
8166335	1.45e-11	1.49e-13	-10.5626	20.7209	-1.28425	PDHA1	pyruvate dehydrogenase (lipoamide) alpha 1
7975747	1.47e-11	1.51e-13	-10.5564	20.7026	-1.16233	DLST	dihydrolipoamide S-succinyltransferase
7948920	1.51e-11	1.56e-13	-10.5461	20.6722	-5.13946	SLC22A6	solute carrier family 22 member 6
8071861	1.53e-11	1.58e-13	-10.541	20.657	-2.89456	SUSD2	sushi domain containing 2
8151512	1.54e-11	1.6e-13	10.5367	20.6443	1.80764	PAG1	phosphoprotein membrane anchor with glycosphingolipid microdomains 1
8095628	1.55e-11	1.61e-13	-10.5347	20.6384	-4.61362	ALB	albumin
8009145	1.61e-11	1.68e-13	-10.5206	20.5967	-1.91636	KCNH6	potassium voltage-gated channel subfamily H member 6
8072577	1.66e-11	1.74e-13	10.5094	20.5635	1.18104	YWHAH	tyrosine 3-monooxygenase/tryptophan 5-monooxygenase activation protein eta
8100338	1.69e-11	1.78e-13	-10.5027	20.5436	-0.644313	ERVMER34-1	endogenous retrovirus group MER34 member 1
8038695	1.72e-11	1.81e-13	-10.4954	20.5221	-1.72244	KLK7	kallikrein related peptidase 7
8049187	1.73e-11	1.83e-13	-10.4934	20.516	-2.7381	EFHD1	EF-hand domain family member D1
8150036	1.73e-11	1.83e-13	-10.4926	20.5138	-1.11616	KIF13B	kinesin family member 13B
8173600	1.73e-11	1.84e-13	-10.4911	20.5091	-1.27106	NAP1L2	nucleosome assembly protein 1 like 2
8054945	1.75e-11	1.87e-13	-10.4856	20.4928	-1.4612	BIN1	bridging integrator 1
8108954	1.75e-11	1.87e-13	10.4847	20.4901	1.06474	TCERG1	transcription elongation regulator 1
8043504	1.8e-11	1.93e-13	-10.4745	20.4599	-4.02696	MAL	mal, T-cell differentiation protein
8160786	1.81e-11	1.94e-13	-10.4722	20.4533	-2.03011	KIAA1161	KIAA1161
8058627	1.84e-11	1.98e-13	-10.4655	20.4331	-4.2511	ERBB4	erb-b2 receptor tyrosine kinase 4
8047248	1.84e-11	1.99e-13	-10.4638	20.4283	-2.41656	PLCL1	phospholipase C like 1
7899029	1.85e-11	2.01e-13	-10.4612	20.4204	-1.87573	MAN1C1	mannosidase alpha class 1C member 1
7916592	1.93e-11	2.1e-13	10.4464	20.3766	0.756501	MYSM1	Myb like, SWIRM and MPN domains 1
8138363	1.98e-11	2.16e-13	-10.4378	20.3508	-2.2105	SOSTDC1	sclerostin domain containing 1
8147065	1.98e-11	2.17e-13	-10.4361	20.3458	-2.27232	RALYL	RALY RNA binding protein-like
7960529	1.98e-11	2.17e-13	-10.4356	20.3443	-3.81659	SCNN1A	sodium channel epithelial 1 alpha subunit
7978260	2.04e-11	2.24e-13	-10.4254	20.3141	-1.2022	DHRS1	dehydrogenase/reductase 1
8154476	2.14e-11	2.36e-13	-10.4071	20.2595	-1.62601	SH3GL2	SH3 domain containing GRB2 like 2, endophilin A1
7946306	2.15e-11	2.38e-13	-10.4054	20.2545	-0.936708	OVCH2	ovochymase 2 (gene/pseudogene)
8111490	2.16e-11	2.39e-13	-10.4032	20.2481	-3.57783	PRLR	prolactin receptor
8043585	2.29e-11	2.54e-13	-10.3828	20.1874	-0.674021	CIAO1	cytosolic iron-sulfur assembly component 1
7936661	2.39e-11	2.66e-13	-10.3673	20.1411	-0.96165	PRDX3	peroxiredoxin 3
8159687	2.4e-11	2.68e-13	-10.3655	20.1358	-0.669233	MRPL41	mitochondrial ribosomal protein L41
7955348	2.68e-11	3e-13	-10.3279	20.0234	-3.85947	GPD1	glycerol-3-phosphate dehydrogenase 1
8077958	2.75e-11	3.09e-13	-10.3183	19.9948	-1.20609	HDAC11	histone deacetylase 11
7958761	2.75e-11	3.1e-13	-10.3167	19.99	-1.45774	ACAD10	acyl-CoA dehydrogenase family member 10
8033054	2.76e-11	3.11e-13	-10.3155	19.9864	-0.942102	FUT3	fucosyltransferase 3 (Lewis blood group)
7956242	2.81e-11	3.18e-13	-10.3078	19.9633	-1.03414	COQ10A	coenzyme Q10A
8119898	2.83e-11	3.22e-13	10.3045	19.9535	2.44695	VEGFA	vascular endothelial growth factor A
8073633	2.84e-11	3.23e-13	-10.3033	19.9499	-2.69024	PNPLA3	patatin like phospholipase domain containing 3
8148917	2.86e-11	3.27e-13	-10.2994	19.9383	-1.60012	MFSD3	major facilitator superfamily domain containing 3
8028514	2.86e-11	3.27e-13	-10.299	19.9371	-0.741756	EIF3K	eukaryotic translation initiation factor 3 subunit K
7975956	2.89e-11	3.32e-13	-10.2938	19.9216	-0.788604	GSTZ1	glutathione S-transferase zeta 1
7923347	2.92e-11	3.35e-13	-10.2905	19.9116	-2.30893	LAD1	ladinin 1
8155083	2.93e-11	3.38e-13	10.2879	19.904	4.07693	CA9	carbonic anhydrase 9
8093821	2.93e-11	3.38e-13	-10.2877	19.9032	-1.45572	LINC00955	long intergenic non-protein coding RNA 955
7949719	2.96e-11	3.43e-13	-10.2831	19.8897	-2.31282	PC	pyruvate carboxylase
7905283	3e-11	3.49e-13	-10.2773	19.8722	-2.62532	ANXA9	annexin A9
8160024	3.12e-11	3.63e-13	-10.2642	19.8331	-2.8613	GLDC	glycine decarboxylase
8070097	3.12e-11	3.65e-13	-10.2624	19.8277	-1.1476	DNAJC28	DnaJ heat shock protein family (Hsp40) member C28
8062371	3.12e-11	3.66e-13	-10.2618	19.8258	-0.947487	MANBAL	mannosidase beta like
8147697	3.14e-11	3.69e-13	-10.2588	19.8167	-2.03024	GRHL2	grainyhead like transcription factor 2
7920123	3.17e-11	3.74e-13	10.2548	19.8047	1.20887	S100A10	S100 calcium binding protein A10
7918008	3.21e-11	3.79e-13	-10.2497	19.7894	-1.00664	DBT	dihydrolipoamide branched chain transacylase E2
8167305	3.27e-11	3.89e-13	-10.2414	19.7648	-1.38114	EBP	emopamil binding protein (sterol isomerase)
8163116	3.27e-11	3.9e-13	-10.2406	19.7624	-1.05493	EPB41L4B	erythrocyte membrane protein band 4.1 like 4B
8016371	3.28e-11	3.92e-13	-10.2387	19.7565	-1.34108	SCRN2	secernin 2
8136067	3.53e-11	4.23e-13	-10.2136	19.6813	-2.19465	TSPAN33	tetraspanin 33
7912928	3.64e-11	4.37e-13	-10.2025	19.6478	-1.18948	SDHB	succinate dehydrogenase complex iron sulfur subunit B
8028756	3.65e-11	4.4e-13	-10.2005	19.642	-0.9749	PSMC4	proteasome 26S subunit, ATPase 4
8096580	3.68e-11	4.44e-13	-10.1974	19.6326	-2.51955	MTTP	microsomal triglyceride transfer protein
8116635	3.83e-11	4.63e-13	-10.1834	19.5906	-2.11983	BPHL	biphenyl hydrolase like
7975203	4.07e-11	4.97e-13	-10.1604	19.5214	-1.0955	MPP5	membrane palmitoylated protein 5
7983239	4.07e-11	4.97e-13	-10.16	19.5203	-1.85955	CKMT1A///CKMT1B///CKMT1A///CKMT1B	creatine kinase, mitochondrial 1A///creatine kinase, mitochondrial 1B///creatine kinase, mitochondrial 1A///creatine kinase, mitochondrial 1B
7983256	4.07e-11	4.97e-13	-10.16	19.5203	-1.85955	CKMT1A///CKMT1B///CKMT1A///CKMT1B	creatine kinase, mitochondrial 1A///creatine kinase, mitochondrial 1B///creatine kinase, mitochondrial 1A///creatine kinase, mitochondrial 1B
8123695	4.1e-11	5.02e-13	-10.1571	19.5115	-1.64044	ECI2	enoyl-CoA delta isomerase 2
8045323	4.3e-11	5.28e-13	10.1401	19.4603	0.540663	C2orf27B///C2orf27A	chromosome 2 open reading frame 27B///chromosome 2 open reading frame 27A
8035449	4.45e-11	5.48e-13	-10.1283	19.4246	-0.903953	LSM4	LSM4 homolog, U6 small nuclear RNA and mRNA degradation associated
8042701	4.53e-11	5.6e-13	-10.1211	19.4029	-1.34096	EMX1	empty spiracles homeobox 1
8042942	4.73e-11	5.85e-13	10.1064	19.3588	3.10299	HK2	hexokinase 2
8008064	4.83e-11	6e-13	-10.0984	19.3345	-1.41744	PNPO	pyridoxamine 5'-phosphate oxidase
8062728	4.83e-11	6e-13	-10.098	19.3334	-2.17622	SGK2	SGK2, serine/threonine kinase 2
8154047	4.83e-11	6.01e-13	-10.0974	19.3315	-0.623288	DMRT2	doublesex and mab-3 related transcription factor 2
8148270	4.85e-11	6.06e-13	-10.0951	19.3245	-1.087	NDUFB9	NADH:ubiquinone oxidoreductase subunit B9
8077366	4.85e-11	6.07e-13	-10.0944	19.3224	-0.622029	LRRN1	leucine rich repeat neuronal 1
7950142	4.85e-11	6.09e-13	-10.093	19.3183	-0.897652	CLPB	ClpB homolog, mitochondrial AAA ATPase chaperonin
8086908	4.91e-11	6.17e-13	-10.0888	19.3056	-1.59512	PLXNB1	plexin B1
8168205	5.15e-11	6.49e-13	-10.0722	19.2556	-0.933819	FOXO4	forkhead box O4
7961580	5.19e-11	6.56e-13	-10.0689	19.2455	-1.6083	LMO3	LIM domain only 3
7918255	5.31e-11	6.73e-13	10.0602	19.2194	0.661259	CLCC1	chloride channel CLIC like 1
7898627	5.31e-11	6.75e-13	-10.0595	19.2171	-0.984222	VWA5B1	von Willebrand factor A domain containing 5B1
7959131	5.35e-11	6.81e-13	-10.0566	19.2085	-2.13822	BICDL1	BICD family like cargo adaptor 1
8089729	5.49e-11	7e-13	-10.0473	19.1804	-1.76465	IGSF11	immunoglobulin superfamily member 11
8157487	6.08e-11	7.77e-13	-10.0129	19.0763	-2.15303	PAPPA	pappalysin 1
8064388	6.63e-11	8.52e-13	-9.98304	18.9858	-1.05436	SLC52A3	solute carrier family 52 member 3
8113358	6.87e-11	8.85e-13	9.97046	18.9476	2.54838	ST8SIA4	ST8 alpha-N-acetyl-neuraminide alpha-2,8-sialyltransferase 4
8080438	6.91e-11	8.92e-13	-9.96784	18.9397	-0.703772	SPCS1	signal peptidase complex subunit 1
7899289	7.16e-11	9.26e-13	-9.95543	18.902	-0.863231	WDTC1	WD and tetratricopeptide repeats 1
8009176	7.38e-11	9.57e-13	-9.94487	18.87	-1.03376	TACO1	translational activator of cytochrome c oxidase I
8155250	7.49e-11	9.74e-13	-9.93907	18.8523	-1.51946	GRHPR	glyoxylate and hydroxypyruvate reductase
8120335	7.7e-11	1e-12	-9.92912	18.8221	-2.20289	FAM83B	family with sequence similarity 83 member B
8079966	7.76e-11	1.02e-12	-9.92535	18.8107	-1.90503	SEMA3B	semaphorin 3B
8157949	7.76e-11	1.02e-12	-9.92532	18.8106	-0.989794	RALGPS1	Ral GEF with PH domain and SH3 binding motif 1
8074498	7.8e-11	1.02e-12	-9.92266	18.8025	-0.624258	TXNRD2	thioredoxin reductase 2
8149986	7.97e-11	1.05e-12	9.91499	18.7792	2.15478	ZNF395	zinc finger protein 395
8101881	8.08e-11	1.07e-12	-9.90958	18.7627	-3.37006	ADH1B	alcohol dehydrogenase 1B (class I), beta polypeptide
7979916	8.37e-11	1.11e-12	-9.89755	18.7261	-1.0884	SYNJ2BP-COX16///SYNJ2BP	SYNJ2BP-COX16 readthrough///synaptojanin 2 binding protein
8077635	8.47e-11	1.12e-12	-9.89224	18.71	-0.985625	OGG1	8-oxoguanine DNA glycosylase
8085374	8.54e-11	1.14e-12	-9.88876	18.6994	-0.669258	RAF1///RAF1	Raf-1 proto-oncogene, serine/threonine kinase///Raf-1 proto-oncogene, serine/threonine kinase
8082400	8.83e-11	1.18e-12	-9.87688	18.6632	-0.495567	KBTBD12	kelch repeat and BTB domain containing 12
8100328	8.86e-11	1.18e-12	-9.87507	18.6577	-0.954514	USP46	ubiquitin specific peptidase 46
8118124	8.94e-11	1.2e-12	-9.87169	18.6474	-1.5469	MCCD1	mitochondrial coiled-coil domain 1
8026341	8.97e-11	1.2e-12	-9.8698	18.6417	-0.893989	TECR	trans-2,3-enoyl-CoA reductase
7964535	8.97e-11	1.21e-12	-9.86859	18.638	-1.9386	CYP27B1	cytochrome P450 family 27 subfamily B member 1
7950524	8.97e-11	1.21e-12	-9.86824	18.6369	-0.488049	MAP6	microtubule associated protein 6
8115831	9.19e-11	1.24e-12	9.85949	18.6102	1.30195	DUSP1	dual specificity phosphatase 1
8085788	9.72e-11	1.32e-12	-9.84049	18.5523	-0.847908	NKIRAS1	NFKB inhibitor interacting Ras like 1
8133670	9.72e-11	1.32e-12	-9.84007	18.5511	-1.06676	POR	cytochrome p450 oxidoreductase
7942315	9.75e-11	1.33e-12	-9.83816	18.5452	-0.522636	LRTOMT	leucine rich transmembrane and O-methyltransferase domain containing
7941164	9.85e-11	1.34e-12	-9.83413	18.5329	-1.17263	MRPL49	mitochondrial ribosomal protein L49
7947363	9.86e-11	1.35e-12	-9.8331	18.5298	-1.46371	WT1	Wilms tumor 1
8092541	1.02e-10	1.4e-12	-9.82111	18.4932	-2.75388	LIPH	lipase H
8170027	1.03e-10	1.41e-12	9.81783	18.4832	0.969441	INTS6L	integrator complex subunit 6 like
7971615	1.03e-10	1.42e-12	9.81538	18.4757	0.706676	EBPL	emopamil binding protein like
7948995	1.04e-10	1.44e-12	9.81239	18.4666	0.848121	ATL3	atlastin GTPase 3
7978335	1.05e-10	1.45e-12	-9.80877	18.4555	-0.805891	SDR39U1	short chain dehydrogenase/reductase family 39U member 1
7964937	1.07e-10	1.48e-12	9.80256	18.4366	0.695379	ZFC3H1	zinc finger C3H1-type containing
8046238	1.08e-10	1.5e-12	-9.79831	18.4236	-1.60044	MYO3B	myosin IIIB
7918379	1.08e-10	1.5e-12	-9.79812	18.423	-2.92506	GSTM3	glutathione S-transferase mu 3
7967544	1.09e-10	1.53e-12	9.79208	18.4045	2.67986	SCARB1	scavenger receptor class B member 1
7966760	1.11e-10	1.55e-12	-9.78813	18.3925	-1.42855	FBXO21	F-box protein 21
8154333	1.17e-10	1.64e-12	9.76868	18.333	0.812894	KDM4C	lysine demethylase 4C
7956097	1.21e-10	1.7e-12	-9.75809	18.3006	-1.47033	SUOX	sulfite oxidase
7983393	1.21e-10	1.71e-12	-9.75573	18.2934	-2.89136	SORD	sorbitol dehydrogenase
8120992	1.21e-10	1.71e-12	9.75509	18.2914	1.0212	ZNF292	zinc finger protein 292
7913146	1.26e-10	1.79e-12	-9.74094	18.2481	-1.96062	AKR7A3	aldo-keto reductase family 7 member A3
8010673	1.28e-10	1.81e-12	-9.73737	18.2372	-2.52803	SLC25A10	solute carrier family 25 member 10
7970251	1.28e-10	1.81e-12	-9.73662	18.2349	-2.7645	PROZ	protein Z, vitamin K dependent plasma glycoprotein
8149097	1.28e-10	1.82e-12	-9.73591	18.2327	-3.11967	DEFB1	defensin beta 1
7979524	1.3e-10	1.86e-12	-9.72801	18.2085	-2.46279	TMEM30B	transmembrane protein 30B
8138789	1.31e-10	1.87e-12	9.7257	18.2014	1.01224	JAZF1	JAZF zinc finger 1
8118890	1.31e-10	1.88e-12	-9.72418	18.1968	-0.942268	SCUBE3	signal peptide, CUB domain and EGF like domain containing 3
7941104	1.31e-10	1.88e-12	-9.72411	18.1966	-1.20882	ARL2-SNX15///ARL2	ARL2-SNX15 readthrough (NMD candidate)///ADP ribosylation factor like GTPase 2
8167027	1.31e-10	1.89e-12	-9.72319	18.1938	-2.52215	RGN	regucalcin
8054054	1.34e-10	1.93e-12	9.71583	18.1712	1.11503	ANKRD36BP2///ANKRD36///ANKRD36B	ankyrin repeat domain 36B pseudogene 2///ankyrin repeat domain 36///ankyrin repeat domain 36B
7969835	1.36e-10	1.97e-12	-9.70987	18.1529	-1.48749	PCCA	propionyl-CoA carboxylase alpha subunit
8073192	1.37e-10	1.99e-12	-9.70588	18.1407	-1.13406	UQCRFS1	ubiquinol-cytochrome c reductase, Rieske iron-sulfur polypeptide 1
7911993	1.42e-10	2.07e-12	-9.69341	18.1024	-0.883736	ICMT	isoprenylcysteine carboxyl methyltransferase
8164235	1.48e-10	2.16e-12	-9.67963	18.0601	-0.594972	PTRH1	peptidyl-tRNA hydrolase 1 homolog
7947969	1.55e-10	2.26e-12	9.66442	18.0134	0.799911	FNBP4	formin binding protein 4
8077370	1.56e-10	2.29e-12	-9.66134	18.004	-0.833774	SETMAR	SET domain and mariner transposase fusion gene
7996563	1.58e-10	2.32e-12	-9.65635	17.9886	-3.74341	HSD11B2	hydroxysteroid 11-beta dehydrogenase 2
7903461	1.58e-10	2.33e-12	-9.65515	17.985	-1.43588	NTNG1	netrin G1
7979085	1.62e-10	2.38e-12	9.64771	17.9621	2.25754	PYGL	phosphorylase, glycogen, liver
8096251	1.62e-10	2.4e-12	-9.64518	17.9543	-0.841458	NUDT9	nudix hydrolase 9
8091283	1.63e-10	2.42e-12	9.64294	17.9474	2.30535	PLOD2	procollagen-lysine,2-oxoglutarate 5-dioxygenase 2
7996341	1.63e-10	2.43e-12	-9.64167	17.9435	-1.30209	PDP2	pyruvate dehyrogenase phosphatase catalytic subunit 2
8140468	1.67e-10	2.49e-12	9.63385	17.9195	1.23311	GSAP	gamma-secretase activating protein
8156043	1.69e-10	2.52e-12	-9.63047	17.9091	-2.9641	PSAT1	phosphoserine aminotransferase 1
7996430	1.71e-10	2.56e-12	9.62508	17.8925	2.23489	HSF4	heat shock transcription factor 4
8025659	1.74e-10	2.6e-12	-9.61945	17.8752	-0.80388	ATG4D	autophagy related 4D cysteine peptidase
8082012	1.76e-10	2.66e-12	-9.61236	17.8533	-2.29635	SLC15A2	solute carrier family 15 member 2
8106534	1.76e-10	2.66e-12	9.61227	17.8531	0.635215	PAPD4	poly(A) RNA polymerase D4, non-canonical
8037037	1.76e-10	2.66e-12	-9.6121	17.8526	-0.827122	ATP5SL	ATP5S like
8163505	1.78e-10	2.7e-12	-9.608	17.8399	-1.98686	HDHD3	haloacid dehalogenase like hydrolase domain containing 3
7970084	1.78e-10	2.7e-12	-9.60743	17.8382	-0.92104	NAXD	NAD(P)HX dehydratase
8062023	1.8e-10	2.74e-12	-9.60338	17.8257	-0.710194	MAP1LC3A	microtubule associated protein 1 light chain 3 alpha
8055639	1.84e-10	2.81e-12	9.5948	17.7993	1.58034	ZEB2	zinc finger E-box binding homeobox 2
7934553	1.86e-10	2.84e-12	-9.59184	17.7902	-1.10683	ZNF503	zinc finger protein 503
7912863	1.94e-10	2.96e-12	-9.57766	17.7465	-1.92813	LOC102724562///MST1L///MST1P2///MST1	macrophage stimulating 1 pseudogene///macrophage stimulating 1 like///macrophage stimulating 1 pseudogene 2///macrophage stimulating 1
8043697	1.95e-10	2.98e-12	9.57561	17.7402	1.10245	ANKRD36BP2///ANKRD36C///ANKRD36///ANKRD36B	ankyrin repeat domain 36B pseudogene 2///ankyrin repeat domain 36C///ankyrin repeat domain 36///ankyrin repeat domain 36B
8044766	1.95e-10	3e-12	9.57399	17.7351	1.55328	INSIG2	insulin induced gene 2
8016018	1.96e-10	3.01e-12	-9.57237	17.7302	-1.21278	SLC25A39	solute carrier family 25 member 39
8054329	2.01e-10	3.1e-12	9.56346	17.7027	1.08105	RNF149	ring finger protein 149
8030078	2.04e-10	3.15e-12	-9.55788	17.6855	-0.93621	SPHK2	sphingosine kinase 2
8135804	2.05e-10	3.18e-12	-9.55518	17.6771	-2.73567	ASB15	ankyrin repeat and SOCS box containing 15
8079630	2.1e-10	3.26e-12	-9.54719	17.6525	-0.951183	TMA7	translation machinery associated 7 homolog
8160647	2.12e-10	3.31e-12	-9.54236	17.6376	-0.92328	BAG1	BCL2 associated athanogene 1
8017885	2.12e-10	3.31e-12	-9.54234	17.6375	-2.28105	ABCA8	ATP binding cassette subfamily A member 8
8016590	2.12e-10	3.31e-12	-9.54179	17.6358	-0.714778	FAM117A	family with sequence similarity 117 member A
8013588	2.16e-10	3.39e-12	-9.53469	17.6139	-0.975066	POLDIP2	DNA polymerase delta interacting protein 2
8118622	2.16e-10	3.41e-12	-9.53267	17.6077	-1.27411	HSD17B8	hydroxysteroid 17-beta dehydrogenase 8
8178234	2.16e-10	3.41e-12	-9.53267	17.6077	-1.27411	HSD17B8	hydroxysteroid 17-beta dehydrogenase 8
8179534	2.16e-10	3.41e-12	-9.53267	17.6077	-1.27411	HSD17B8	hydroxysteroid 17-beta dehydrogenase 8
7907297	2.18e-10	3.44e-12	-9.52935	17.5974	-2.45114	FMO4	flavin containing monooxygenase 4
7900395	2.21e-10	3.49e-12	9.5244	17.5821	1.12984	RLF	rearranged L-myc fusion
8082046	2.21e-10	3.51e-12	-9.52319	17.5784	-2.35335	CASR	calcium sensing receptor
8045030	2.27e-10	3.6e-12	-9.51472	17.5522	-2.13092	MYO7B	myosin VIIB
7943853	2.33e-10	3.71e-12	-9.50543	17.5235	-0.947279	SDHD	succinate dehydrogenase complex subunit D
7953243	2.34e-10	3.73e-12	-9.50343	17.5173	-0.938087	NDUFA9	NADH:ubiquinone oxidoreductase subunit A9
8008706	2.4e-10	3.84e-12	-9.49442	17.4895	-1.0529	DYNLL2	dynein light chain LC8-type 2
8103601	2.41e-10	3.85e-12	9.49314	17.4855	1.32926	DDX60L	DEAD-box helicase 60-like
7914354	2.42e-10	3.88e-12	-9.49085	17.4784	-0.698304	PEF1	penta-EF-hand domain containing 1
8137680	2.43e-10	3.9e-12	-9.48883	17.4722	-0.960962	ADAP1	ArfGAP with dual PH domains 1
8167369	2.43e-10	3.92e-12	-9.48785	17.4691	-1.39307	HDAC6	histone deacetylase 6
8050232	2.45e-10	3.96e-12	-9.48449	17.4587	-0.880543	CYS1	cystin 1
8126729	2.47e-10	3.99e-12	-9.48148	17.4494	-2.86026	CLIC5	chloride intracellular channel 5
7999233	2.49e-10	4.03e-12	-9.4783	17.4396	-0.704145	GLYR1	glyoxylate reductase 1 homolog
8086462	2.56e-10	4.16e-12	-9.46827	17.4085	-0.715535	POMGNT2	protein O-linked mannose N-acetylglucosaminyltransferase 2 (beta 1,4-)
8082911	2.56e-10	4.17e-12	9.4679	17.4074	1.11333	NCK1	NCK adaptor protein 1
8058428	2.56e-10	4.17e-12	-9.46786	17.4073	-1.03837	NDUFS1	NADH:ubiquinone oxidoreductase core subunit S1
7938559	2.56e-10	4.19e-12	-9.46627	17.4023	-0.621197	RASSF10	Ras association domain family member 10
8083630	2.64e-10	4.34e-12	-9.45459	17.3662	-0.775214	GFM1	G elongation factor mitochondrial 1
8012475	2.64e-10	4.35e-12	-9.45425	17.3651	-1.69466	MYH10	myosin, heavy chain 10, non-muscle
8043835	2.64e-10	4.35e-12	-9.45391	17.3641	-1.20525	C2orf15	chromosome 2 open reading frame 15
7964234	2.65e-10	4.37e-12	-9.45248	17.3596	-0.803274	ATP5B	ATP synthase, H+ transporting, mitochondrial F1 complex, beta polypeptide
7933537	2.67e-10	4.41e-12	-9.44931	17.3498	-3.61571	OGDHL	oxoglutarate dehydrogenase-like
8017766	2.67e-10	4.43e-12	-9.44845	17.3472	-2.56836	APOH	apolipoprotein H
8150978	2.67e-10	4.43e-12	-9.44816	17.3462	-0.863089	CA8	carbonic anhydrase 8
8045688	2.67e-10	4.43e-12	9.44798	17.3457	4.54348	TNFAIP6	TNF alpha induced protein 6
7902290	2.68e-10	4.46e-12	-9.44585	17.3391	-1.8273	CTH	cystathionine gamma-lyase
8078008	2.69e-10	4.48e-12	-9.44469	17.3355	-1.01818	LSM3	LSM3 homolog, U6 small nuclear RNA and mRNA degradation associated
8043283	2.76e-10	4.62e-12	9.43465	17.3044	1.11285	KDM3A	lysine demethylase 3A
8041542	2.89e-10	4.84e-12	-9.41957	17.2576	-1.99851	GALM	galactose mutarotase
7909689	2.9e-10	4.88e-12	9.41746	17.2511	1.05342	SMYD2	SET and MYND domain containing 2
7901691	2.92e-10	4.92e-12	-9.41471	17.2425	-0.892826	BSND	barttin CLCNK type accessory beta subunit
8094301	2.94e-10	4.97e-12	-9.41144	17.2324	-3.12553	SLIT2	slit guidance ligand 2
7982723	2.94e-10	4.97e-12	-9.41131	17.232	-1.53848	IVD	isovaleryl-CoA dehydrogenase
7956989	2.95e-10	4.98e-12	9.41045	17.2293	1.11344	MDM2	MDM2 proto-oncogene
8157300	2.96e-10	5.01e-12	-9.40861	17.2236	-0.925644	BSPRY	B-box and SPRY domain containing
7938269	2.99e-10	5.08e-12	-9.40456	17.211	-1.22707	TUB	tubby bipartite transcription factor
8087685	3.01e-10	5.12e-12	-9.40188	17.2027	-0.752025	TMEM115	transmembrane protein 115
8169709	3.05e-10	5.19e-12	-9.39727	17.1884	-1.27619	GLRX5	glutaredoxin 5
8046646	3.12e-10	5.32e-12	-9.38931	17.1637	-1.12318	OSBPL6	oxysterol binding protein like 6
8042962	3.12e-10	5.34e-12	-9.38849	17.1612	-0.568596	MRPL19	mitochondrial ribosomal protein L19
7967789	3.15e-10	5.4e-12	-9.38463	17.1492	-1.15292	PXMP2	peroxisomal membrane protein 2
7959500	3.15e-10	5.4e-12	-9.38457	17.149	-0.951895	HIP1R	huntingtin interacting protein 1 related
8052979	3.15e-10	5.41e-12	-9.38397	17.1471	-1.14477	SFXN5	sideroflexin 5
7941074	3.15e-10	5.42e-12	-9.38381	17.1466	-3.94712	SLC22A12	solute carrier family 22 member 12
8076563	3.15e-10	5.44e-12	-9.3825	17.1426	-0.974155	MCAT	malonyl-CoA-acyl carrier protein transacylase
8132055	3.18e-10	5.49e-12	-9.3795	17.1332	-1.53222	MTURN	maturin, neural progenitor differentiation regulator homolog (Xenopus)
7971922	3.38e-10	5.85e-12	-9.35895	17.0694	-0.904968	PCDH9	protocadherin 9
8085300	3.5e-10	6.08e-12	-9.34681	17.0316	-1.0214	SEC13	SEC13 homolog, nuclear pore and COPII coat complex component
8055872	3.54e-10	6.15e-12	-9.34295	17.0196	-0.916701	CACNB4	calcium voltage-gated channel auxiliary subunit beta 4
8115851	3.61e-10	6.28e-12	9.33624	16.9987	2.55398	STC2	stanniocalcin 2
8090295	3.63e-10	6.33e-12	-9.33388	16.9914	-0.658098	SLC41A3	solute carrier family 41 member 3
8173299	3.64e-10	6.36e-12	9.33222	16.9862	2.04219	EDA2R	ectodysplasin A2 receptor
8087825	3.81e-10	6.69e-12	-9.31636	16.9368	-0.671723	ABHD14B	abhydrolase domain containing 14B
8149071	3.87e-10	6.82e-12	9.3103	16.9179	3.4524	ANGPT2	angiopoietin 2
8094184	3.98e-10	7.01e-12	-9.30139	16.8902	-1.00524	C1QTNF7	C1q and tumor necrosis factor related protein 7
8004832	3.99e-10	7.05e-12	-9.29933	16.8838	-0.514969	RANGRF	RAN guanine nucleotide release factor
8096959	4.15e-10	7.36e-12	-9.28587	16.8418	-2.61671	ANK2	ankyrin 2, neuronal
7952927	4.15e-10	7.37e-12	-9.28544	16.8405	-0.943473	B4GALNT3	beta-1,4-N-acetyl-galactosaminyltransferase 3
8114845	4.19e-10	7.44e-12	9.28227	16.8306	1.64103	PRELID2	PRELI domain containing 2
8127370	4.19e-10	7.47e-12	-9.28126	16.8274	-0.661802	KHDRBS2	KH RNA binding domain containing, signal transduction associated 2
7909127	4.25e-10	7.58e-12	-9.27657	16.8128	-2.39546	MFSD4A	major facilitator superfamily domain containing 4A
8153776	4.26e-10	7.61e-12	-9.2751	16.8082	-0.81622	VPS28	VPS28, ESCRT-I subunit
8079170	4.37e-10	7.83e-12	-9.26615	16.7803	-0.93684	TCAIM	T-cell activation inhibitor, mitochondrial
7910164	4.49e-10	8.05e-12	-9.25707	16.752	-1.23556	COQ8A	coenzyme Q8A
8135436	4.49e-10	8.07e-12	-9.25654	16.7503	-1.65824	SLC26A4	solute carrier family 26 member 4
7986687	4.67e-10	8.4e-12	9.24367	16.7101	0.818022	WHAMMP1///WHAMMP2///WHAMMP3///WHAMM	WAS protein homolog associated with actin, golgi membranes and microtubules pseudogene 1///WAS protein homolog associated with actin, golgi membranes and microtubules pseudogene 2///WAS protein homolog associated with actin, golgi membranes and microtubules pseudogene 3///WAS protein homolog associated with actin, golgi membranes and microtubules
7992639	4.69e-10	8.45e-12	-9.24176	16.7042	-0.935481	TBC1D24	TBC1 domain family member 24
7996761	4.88e-10	8.83e-12	-9.22787	16.6608	-1.20695	PLA2G15	phospholipase A2 group XV
7942697	4.88e-10	8.83e-12	-9.22778	16.6605	-1.06167	CAPN5	calpain 5
8019376	4.95e-10	8.98e-12	-9.2223	16.6434	-0.741741	DUS1L	dihydrouridine synthase 1 like
8033043	5e-10	9.08e-12	-9.21877	16.6324	-2.75817	FUT6	fucosyltransferase 6
8032509	5.03e-10	9.15e-12	-9.21643	16.625	-1.07212	GNG7	G protein subunit gamma 7
8085094	5.11e-10	9.31e-12	-9.21087	16.6076	-0.605101	SUMF1	sulfatase modifying factor 1
7923837	5.22e-10	9.53e-12	-9.20366	16.5851	-2.51163	PM20D1	peptidase M20 domain containing 1
8157270	5.22e-10	9.55e-12	-9.20271	16.5821	-1.0022	SLC31A1	solute carrier family 31 member 1
7916862	5.23e-10	9.58e-12	-9.20181	16.5793	-1.63526	WLS	wntless Wnt ligand secretion mediator
8130732	5.31e-10	9.75e-12	-9.19641	16.5624	-1.46973	MPC1	mitochondrial pyruvate carrier 1
7962625	5.32e-10	9.78e-12	-9.19543	16.5593	-1.34615	RAPGEF3	Rap guanine nucleotide exchange factor 3
8046546	5.39e-10	9.93e-12	-9.19051	16.544	-1.40101	HOXD8	homeobox D8
8083901	5.42e-10	9.99e-12	9.18854	16.5378	0.982988	FNDC3B	fibronectin type III domain containing 3B
8086627	5.46e-10	1.01e-11	-9.18444	16.525	-1.50255	ALS2CL	ALS2 C-terminal like
8164940	5.48e-10	1.02e-11	-9.18261	16.5192	-1.61438	SARDH	sarcosine dehydrogenase
8111271	5.54e-10	1.03e-11	-9.17861	16.5067	-2.55209	CDH9	cadherin 9
8013741	5.57e-10	1.04e-11	-9.17686	16.5012	-0.553669	SDF2	stromal cell derived factor 2
8083422	5.58e-10	1.04e-11	-9.17568	16.4976	-2.82149	SUCNR1	succinate receptor 1
7976481	5.65e-10	1.06e-11	-9.17083	16.4824	-1.26059	SERPINA4	serpin family A member 4
8052382	5.8e-10	1.09e-11	9.16174	16.4539	0.84333	FANCL	Fanconi anemia complementation group L
7993478	5.8e-10	1.09e-11	9.16173	16.4538	1.44815	ABCC1	ATP binding cassette subfamily C member 1
7972570	5.87e-10	1.1e-11	-9.15767	16.4411	-1.84197	GGACT	gamma-glutamylamine cyclotransferase
7938812	5.97e-10	1.12e-11	-9.15095	16.4201	-1.40021	TMEM86A	transmembrane protein 86A
8068254	6.08e-10	1.15e-11	9.14463	16.4003	1.08853	IL10RB///IL10RB	interleukin 10 receptor subunit beta///interleukin 10 receptor subunit beta
7944216	6.15e-10	1.16e-11	-9.14052	16.3874	-0.697353	ATP5L	ATP synthase, H+ transporting, mitochondrial Fo complex subunit G
7936249	6.15e-10	1.16e-11	-9.14025	16.3865	-2.09768	SORCS1	sortilin related VPS10 domain containing receptor 1
8124008	6.22e-10	1.18e-11	-9.13594	16.373	-1.14571	MCUR1	mitochondrial calcium uniporter regulator 1
8043564	6.23e-10	1.18e-11	-9.13483	16.3696	-0.846302	FAHD2A	fumarylacetoacetate hydrolase domain containing 2A
8065580	6.26e-10	1.19e-11	-9.13282	16.3632	-0.48382	DUSP15	dual specificity phosphatase 15
8080184	6.27e-10	1.19e-11	-9.13172	16.3598	-0.782822	ALAS1///ALAS1	5'-aminolevulinate synthase 1///5'-aminolevulinate synthase 1
7897132	6.27e-10	1.2e-11	-9.13141	16.3588	-1.02446	PRDM16	PR/SET domain 16
8113616	6.34e-10	1.21e-11	9.12726	16.3458	1.09392	FEM1C	fem-1 homolog C
7953878	6.49e-10	1.24e-11	9.11942	16.3212	1.57958	CLEC2D	C-type lectin domain family 2 member D
8140478	6.49e-10	1.24e-11	9.11911	16.3202	1.09277	GSAP	gamma-secretase activating protein
7999769	6.54e-10	1.25e-11	9.11635	16.3116	0.741689	PKD1P6-NPIPP1///NPIPA8///NPIPA7///NPIPA5///NPIPB5///NPIPB6///NPIPA2///NPIPA3///NPIPB4///PKD1P1///PDXDC2P///PKD1P2///NPIPB3///NPIPA1///PKD1///NPIPB5///NPIPB4///NPIPB3	PKD1P6-NPIPP1 readthrough///nuclear pore complex interacting protein family member A8///nuclear pore complex interacting protein family member A7///nuclear pore complex interacting protein family member A5///nuclear pore complex interacting protein family member B5///nuclear pore complex interacting protein family member B6///nuclear pore complex interacting protein family member A2///nuclear por…
8086028	6.68e-10	1.28e-11	-9.10891	16.2882	-1.19839	GLB1	galactosidase beta 1
8003611	6.68e-10	1.29e-11	9.10825	16.2862	1.83266	FAM57A	family with sequence similarity 57 member A
8080212	6.84e-10	1.32e-11	-9.10031	16.2612	-0.940936	GLYCTK	glycerate kinase
8088054	6.87e-10	1.33e-11	-9.09859	16.2558	-1.00836	TMEM110-MUSTN1///TMEM110	TMEM110-MUSTN1 readthrough///transmembrane protein 110
8037363	7.04e-10	1.36e-11	-9.09036	16.23	-1.47353	CADM4	cell adhesion molecule 4
8012450	7.04e-10	1.36e-11	-9.09	16.2289	-0.567297	SLC25A35	solute carrier family 25 member 35
7923596	7.06e-10	1.37e-11	-9.08806	16.2228	-3.15199	ETNK2	ethanolamine kinase 2
8092735	7.2e-10	1.4e-11	-9.08099	16.2005	-2.22077	TMEM207	transmembrane protein 207
8075785	7.2e-10	1.4e-11	-9.08096	16.2005	-1.18989	FOXRED2	FAD dependent oxidoreductase domain containing 2
8145175	7.51e-10	1.47e-11	-9.06702	16.1566	-0.467318	PDLIM2	PDZ and LIM domain 2
8037913	7.54e-10	1.47e-11	-9.06529	16.1512	-0.645105	NAPA	NSF attachment protein alpha
7995829	7.58e-10	1.48e-11	-9.0632	16.1446	-3.21091	MT1H	metallothionein 1H
7982564	7.67e-10	1.5e-11	9.05878	16.1307	1.05475	SPRED1	sprouty related EVH1 domain containing 1
7916853	7.67e-10	1.51e-11	-9.05822	16.129	-0.759265	DIRAS3	DIRAS family GTPase 3
8059776	7.67e-10	1.51e-11	-9.05772	16.1274	-1.09151	KCNJ13	potassium voltage-gated channel subfamily J member 13
7993019	7.7e-10	1.52e-11	-9.05616	16.1225	-0.628073	NUDT16L1	nudix hydrolase 16 like 1
8086754	7.72e-10	1.52e-11	-9.05464	16.1177	-0.840844	SCAP	SREBF chaperone
8083034	7.77e-10	1.54e-11	-9.0519	16.1091	-2.31424	CLSTN2	calsyntenin 2
8014248	7.77e-10	1.54e-11	9.05123	16.107	2.05985	SLFN13	schlafen family member 13
8159945	7.88e-10	1.56e-11	-9.04659	16.0924	-0.753074	AK3	adenylate kinase 3
7962516	7.91e-10	1.57e-11	9.04479	16.0867	1.45495	SLC38A1	solute carrier family 38 member 1
7998759	7.92e-10	1.58e-11	-9.04397	16.0842	-0.827706	PGP	phosphoglycolate phosphatase
8052654	7.95e-10	1.58e-11	9.04228	16.0788	1.20637	PELI1	pellino E3 ubiquitin protein ligase 1
8130837	7.99e-10	1.6e-11	-9.04023	16.0724	-0.73521	FRMD1	FERM domain containing 1
8154733	8e-10	1.6e-11	-9.03921	16.0692	-1.44521	ACO1	aconitase 1
8086810	8.04e-10	1.61e-11	-9.03739	16.0634	-0.749038	SMARCC1	SWI/SNF related, matrix associated, actin dependent regulator of chromatin subfamily c member 1
8062190	8.05e-10	1.62e-11	9.03625	16.0598	1.69308	SPAG4	sperm associated antigen 4
8080100	8.11e-10	1.63e-11	-9.03346	16.0511	-0.854617	RAD54L2	RAD54-like 2 (S. cerevisiae)
7975598	8.13e-10	1.64e-11	-9.03245	16.0479	-1.22698	ACOT1	acyl-CoA thioesterase 1
8127629	8.2e-10	1.65e-11	-9.02897	16.0369	-1.09316	COX7A2	cytochrome c oxidase subunit 7A2
8083223	8.35e-10	1.69e-11	9.02276	16.0174	1.20359	C3orf58	chromosome 3 open reading frame 58
8052934	8.44e-10	1.71e-11	-9.01912	16.0059	-0.655984	MCEE	methylmalonyl-CoA epimerase
7998852	8.68e-10	1.76e-11	-9.00985	15.9767	-0.666651	TCEB2	transcription elongation factor B subunit 2
8132592	8.69e-10	1.76e-11	-9.00887	15.9736	-1.15027	OGDH	oxoglutarate dehydrogenase
8018761	8.89e-10	1.81e-11	-9.00071	15.9479	-2.53014	ST6GALNAC2	ST6 N-acetylgalactosaminide alpha-2,6-sialyltransferase 2
8180372	8.89e-10	1.81e-11	-9.00071	15.9479	-2.53014	ST6GALNAC2	ST6 N-acetylgalactosaminide alpha-2,6-sialyltransferase 2
8065738	8.97e-10	1.83e-11	-8.99713	15.9367	-1.46322	AHCY	adenosylhomocysteinase
8162884	9.09e-10	1.86e-11	-8.99238	15.9217	-6.1296	ALDOB	aldolase, fructose-bisphosphate B
7943424	9.17e-10	1.88e-11	8.98873	15.9102	0.488566	BIRC2	baculoviral IAP repeat containing 2
7975076	9.25e-10	1.9e-11	-8.98564	15.9004	-2.23199	HSPA2	heat shock protein family A (Hsp70) member 2
8027053	9.35e-10	1.93e-11	-8.98054	15.8844	-0.430915	CRTC1	CREB regulated transcription coactivator 1
7993580	9.5e-10	1.96e-11	8.97526	15.8677	0.675234	PKD1P6-NPIPP1///NPIPA8///NPIPA7///NPIPA5///NPIPB5///NPIPB6///NPIPA2///NPIPA3///NPIPB4///PKD1P1///PDXDC2P///NPIPB3///NPIPA1///NPIPB5///NPIPB4///NPIPB3	PKD1P6-NPIPP1 readthrough///nuclear pore complex interacting protein family member A8///nuclear pore complex interacting protein family member A7///nuclear pore complex interacting protein family member A5///nuclear pore complex interacting protein family member B5///nuclear pore complex interacting protein family member B6///nuclear pore complex interacting protein family member A2///nuclear por…
8162502	9.57e-10	1.98e-11	-8.9723	15.8584	-3.18718	FBP1	fructose-bisphosphatase 1
8054045	9.61e-10	1.99e-11	-8.97065	15.8532	-0.801826	FAHD2B///FAHD2A	fumarylacetoacetate hydrolase domain containing 2B///fumarylacetoacetate hydrolase domain containing 2A
8162652	9.73e-10	2.02e-11	-8.9663	15.8394	-1.60527	CTSV	cathepsin V
8010702	9.77e-10	2.03e-11	-8.96449	15.8337	-0.598306	ASPSCR1	ASPSCR1, UBX domain containing tether for SLC2A4
8053801	9.82e-10	2.04e-11	8.96257	15.8277	1.05303	ANKRD36BP2///ANKRD36C///ANKRD36///ANKRD36B	ankyrin repeat domain 36B pseudogene 2///ankyrin repeat domain 36C///ankyrin repeat domain 36///ankyrin repeat domain 36B
7913682	9.85e-10	2.05e-11	-8.96118	15.8233	-1.50166	HMGCL	3-hydroxymethyl-3-methylglutaryl-CoA lyase
7986428	9.95e-10	2.07e-11	8.95734	15.8111	0.715386	LOC400464	ubiquitin conjugating enzyme E2 Q2 pseudogene
7973448	1.04e-09	2.16e-11	-8.94437	15.7702	-1.86508	DHRS4L1///DHRS4L2///DHRS4	dehydrogenase/reductase 4 like 1///dehydrogenase/reductase 4 like 2///dehydrogenase/reductase 4
8078173	1.04e-09	2.17e-11	-8.94257	15.7645	-0.956053	OXNAD1	oxidoreductase NAD binding domain containing 1
7960464	1.05e-09	2.2e-11	8.93956	15.755	3.32103	VWF	von Willebrand factor
8065719	1.09e-09	2.28e-11	-8.92813	15.7189	-0.839716	PXMP4	peroxisomal membrane protein 4
7923332	1.09e-09	2.28e-11	-8.92777	15.7178	-1.25313	TNNT2	troponin T2, cardiac type
8121257	1.1e-09	2.32e-11	8.92269	15.7017	2.19873	PRDM1	PR/SET domain 1
7976523	1.12e-09	2.36e-11	-8.91689	15.6834	-1.69102	TCL6	T-cell leukemia/lymphoma 6 (non-protein coding)
7998637	1.14e-09	2.4e-11	-8.91109	15.6651	-1.6347	MSRB1	methionine sulfoxide reductase B1
7990309	1.14e-09	2.41e-11	-8.90964	15.6605	-1.62118	STRA6	stimulated by retinoic acid 6
8055702	1.14e-09	2.42e-11	8.90901	15.6585	1.24623	NMI	N-myc and STAT interactor
8125512	1.15e-09	2.45e-11	8.90561	15.6477	1.65123	TAP1	transporter 1, ATP binding cassette subfamily B member
8178867	1.15e-09	2.45e-11	8.90561	15.6477	1.65123	TAP1	transporter 1, ATP binding cassette subfamily B member
8180061	1.15e-09	2.45e-11	8.90561	15.6477	1.65123	TAP1	transporter 1, ATP binding cassette subfamily B member
7980908	1.18e-09	2.51e-11	-8.89788	15.6233	-3.16124	FBLN5	fibulin 5
7999614	1.18e-09	2.52e-11	8.8958	15.6167	0.793248	PKD1P6-NPIPP1///NPIPA8///NPIPA7///NPIPA5///NPIPA2///NPIPA3///PKD1P1///PKD1P2///NPIPA1///PKD1	PKD1P6-NPIPP1 readthrough///nuclear pore complex interacting protein family member A8///nuclear pore complex interacting protein family member A7///nuclear pore complex interacting protein family member A5///nuclear pore complex interacting protein family member A2///nuclear pore complex interacting protein family member A3///polycystin 1, transient receptor potential channel interacting pseudoge…
8169419	1.24e-09	2.64e-11	8.881	15.5699	0.826268	ALG13	ALG13, UDP-N-acetylglucosaminyltransferase subunit
7993546	1.27e-09	2.7e-11	8.87424	15.5485	0.713192	PKD1P6-NPIPP1///NPIPA8///NPIPA7///NPIPA5///NPIPB5///NPIPB6///NPIPA2///NPIPA3///NPIPB4///PKD1P1///PDXDC2P///PKD1P2///NPIPB3///NPIPA1///PKD1///NPIPB5///NPIPB4///NPIPB3	PKD1P6-NPIPP1 readthrough///nuclear pore complex interacting protein family member A8///nuclear pore complex interacting protein family member A7///nuclear pore complex interacting protein family member A5///nuclear pore complex interacting protein family member B5///nuclear pore complex interacting protein family member B6///nuclear pore complex interacting protein family member A2///nuclear por…
8002041	1.27e-09	2.71e-11	-8.87316	15.5451	-0.884749	ATP6V0D1	ATPase H+ transporting V0 subunit d1
7914000	1.28e-09	2.75e-11	-8.86901	15.5319	-1.12679	NR0B2	nuclear receptor subfamily 0 group B member 2
8110685	1.29e-09	2.77e-11	-8.86652	15.5241	-2.52353	PP7080///PP7080	uncharacterized LOC25845///uncharacterized LOC25845
8159627	1.32e-09	2.84e-11	-8.85839	15.4983	-1.71713	SLC34A3	solute carrier family 34 member 3
8135902	1.32e-09	2.84e-11	8.85811	15.4974	1.09959	SND1-IT1	SND1 intronic transcript 1
7976826	1.34e-09	2.88e-11	-8.8538	15.4838	-1.84778	SNORD114-26	small nucleolar RNA, C/D box 114-26
8023466	1.36e-09	2.93e-11	-8.8484	15.4666	-1.1437	FECH	ferrochelatase
7944275	1.37e-09	2.95e-11	-8.84676	15.4615	-1.60635	TMEM25	transmembrane protein 25
7983867	1.37e-09	2.96e-11	-8.84594	15.4589	-2.80423	CGNL1	cingulin like 1
7898357	1.38e-09	2.98e-11	-8.84333	15.4506	-1.70399	LOC102724562///MST1L///MST1P2///MST1	macrophage stimulating 1 pseudogene///macrophage stimulating 1 like///macrophage stimulating 1 pseudogene 2///macrophage stimulating 1
8044149	1.4e-09	3.04e-11	-8.83747	15.432	-2.05801	PLGLA///PLGLB1///PLGLB2///PLG	plasminogen-like A (pseudogene)///plasminogen-like B1///plasminogen-like B2///plasminogen
7975661	1.41e-09	3.07e-11	-8.83432	15.422	-0.844232	COQ6	coenzyme Q6, monooxygenase
8010161	1.44e-09	3.14e-11	8.82687	15.3984	0.893328	2020-09-09	septin 9
7994609	1.44e-09	3.15e-11	-8.82638	15.3969	-2.09627	QPRT	quinolinate phosphoribosyltransferase
7962226	1.44e-09	3.15e-11	-8.82602	15.3957	-0.794082	SYT10	synaptotagmin 10
7905324	1.45e-09	3.18e-11	-8.82356	15.3879	-0.832239	C1orf56	chromosome 1 open reading frame 56
8024194	1.45e-09	3.18e-11	-8.82337	15.3873	-1.04484	GPX4	glutathione peroxidase 4
8105040	1.52e-09	3.33e-11	8.80885	15.3413	1.97853	OSMR	oncostatin M receptor
8024660	1.52e-09	3.35e-11	-8.80704	15.3355	-0.576592	HMG20B	high mobility group 20B
7911796	1.54e-09	3.39e-11	-8.80318	15.3233	-1.13004	LINC00982	long intergenic non-protein coding RNA 982
8056327	1.54e-09	3.39e-11	-8.80268	15.3217	-2.15863	GRB14	growth factor receptor bound protein 14
8175155	1.54e-09	3.4e-11	-8.80249	15.3211	-0.635195	FRMD7	FERM domain containing 7
8033257	1.56e-09	3.45e-11	8.79795	15.3067	3.61687	C3	complement component 3
7954899	1.57e-09	3.49e-11	-8.79436	15.2953	-2.67593	CNTN1	contactin 1
8065992	1.58e-09	3.5e-11	-8.79321	15.2916	-0.872109	NFS1	NFS1 cysteine desulfurase
7941976	1.61e-09	3.56e-11	-8.78751	15.2735	-0.762015	NDUFS8	NADH:ubiquinone oxidoreductase core subunit S8
7961503	1.62e-09	3.59e-11	-8.7849	15.2652	-0.697039	SMCO3	single-pass membrane protein with coiled-coil domains 3
8043687	1.67e-09	3.71e-11	8.77515	15.2343	1.27639	ANKRD36	ankyrin repeat domain 36
8169432	1.68e-09	3.74e-11	-8.77218	15.2249	-0.765878	ZCCHC16	zinc finger CCHC-type containing 16
7998604	1.74e-09	3.88e-11	-8.76101	15.1894	-1.2168	HAGH	hydroxyacylglutathione hydrolase
7933672	1.74e-09	3.89e-11	-8.76009	15.1864	-0.857362	PCDH15	protocadherin related 15
8050071	1.74e-09	3.9e-11	-8.75891	15.1827	-1.45633	ADI1	acireductone dioxygenase 1
8149857	1.76e-09	3.95e-11	8.75549	15.1718	0.745552	KCTD9	potassium channel tetramerization domain containing 9
8056343	1.77e-09	3.98e-11	-8.75309	15.1642	-1.52019	COBLL1	cordon-bleu WH2 repeat protein like 1
7954143	1.78e-09	4e-11	-8.75134	15.1586	-2.23651	PTPRO	protein tyrosine phosphatase, receptor type O
7996448	1.8e-09	4.06e-11	8.74686	15.1444	1.58802	NOL3	nucleolar protein 3
8141374	1.8e-09	4.06e-11	-8.74633	15.1427	-3.91051	AZGP1	alpha-2-glycoprotein 1, zinc-binding
8010841	1.81e-09	4.09e-11	-8.74452	15.1369	-2.00311	FN3K	fructosamine 3 kinase
8151032	1.81e-09	4.09e-11	-8.74403	15.1354	-2.34677	GGH	gamma-glutamyl hydrolase
8158976	1.85e-09	4.19e-11	-8.73695	15.1129	-1.44851	CEL	carboxyl ester lipase
8078759	1.86e-09	4.22e-11	-8.7344	15.1048	-2.61146	SLC22A13	solute carrier family 22 member 13
8007493	1.86e-09	4.23e-11	-8.73351	15.1019	-1.43515	ARL4D	ADP ribosylation factor like GTPase 4D
8006298	1.88e-09	4.27e-11	-8.73088	15.0935	-0.637172	RAB11FIP4	RAB11 family interacting protein 4
8102713	1.9e-09	4.32e-11	-8.72741	15.0825	-0.653554	NUDT6	nudix hydrolase 6
7983360	1.95e-09	4.45e-11	8.718	15.0525	1.12323	B2M	beta-2-microglobulin
8034920	1.95e-09	4.45e-11	-8.71772	15.0517	-1.01264	ILVBL	ilvB acetolactate synthase like
8004057	1.96e-09	4.5e-11	-8.71437	15.041	-1.06236	KIF1C	kinesin family member 1C
7905406	1.99e-09	4.56e-11	-8.71021	15.0278	-1.33809	CGN	cingulin
8148220	2e-09	4.59e-11	-8.70857	15.0225	-1.51199	FER1L6	fer-1 like family member 6
7936871	2e-09	4.59e-11	-8.70809	15.021	-1.2871	OAT	ornithine aminotransferase
8055445	2e-09	4.61e-11	8.70674	15.0167	1.06059	DARS	aspartyl-tRNA synthetase
7968734	2e-09	4.62e-11	-8.70635	15.0155	-0.552996	SLC25A15	solute carrier family 25 member 15
7912112	2.03e-09	4.7e-11	-8.70109	14.9987	-1.00783	DNAJC11	DnaJ heat shock protein family (Hsp40) member C11
7932243	2.05e-09	4.73e-11	-8.69881	14.9915	-1.48808	FAM171A1	family with sequence similarity 171 member A1
8162179	2.06e-09	4.77e-11	-8.69653	14.9842	-0.59626	GAS1	growth arrest specific 1
7965884	2.06e-09	4.79e-11	-8.69518	14.9799	-5.36331	PAH	phenylalanine hydroxylase
8000117	2.06e-09	4.79e-11	-8.69483	14.9788	-1.45193	CRYM	crystallin mu
7973458	2.14e-09	4.99e-11	-8.68233	14.939	-1.84568	DHRS4L1///DHRS4L2///DHRS4	dehydrogenase/reductase 4 like 1///dehydrogenase/reductase 4 like 2///dehydrogenase/reductase 4
7979743	2.17e-09	5.07e-11	-8.67747	14.9235	-1.26228	RDH11	retinol dehydrogenase 11 (all-trans/9-cis/11-cis)
8065485	2.18e-09	5.09e-11	-8.67621	14.9195	-0.901791	NINL	ninein like
8056943	2.19e-09	5.11e-11	8.67479	14.915	1.19086	LNPK	lunapark, ER junction formation factor
8014882	2.19e-09	5.11e-11	-8.67457	14.9143	-0.704606	MIEN1	migration and invasion enhancer 1
8087611	2.2e-09	5.14e-11	-8.67279	14.9086	-1.43036	HYAL1	hyaluronoglucosaminidase 1
7921873	2.26e-09	5.32e-11	8.66217	14.8747	2.95033	FCGR3B///FCGR3A	Fc fragment of IgG receptor IIIb///Fc fragment of IgG receptor IIIa
8112202	2.26e-09	5.33e-11	8.66166	14.8731	2.39588	PLK2	polo like kinase 2
7965964	2.26e-09	5.33e-11	8.66165	14.8731	1.37813	SLC41A2	solute carrier family 41 member 2
8045697	2.31e-09	5.45e-11	8.65446	14.8501	0.723532	RIF1	replication timing regulatory factor 1
8071783	2.34e-09	5.55e-11	-8.64887	14.8323	-0.928802	SLC2A11	solute carrier family 2 member 11
7979574	2.37e-09	5.61e-11	-8.64549	14.8215	-0.828126	SGPP1	sphingosine-1-phosphate phosphatase 1
8112803	2.38e-09	5.66e-11	8.6428	14.8129	2.39666	LHFPL2	lipoma HMGIC fusion partner-like 2
8080804	2.39e-09	5.68e-11	-8.64153	14.8089	-0.535975	KCTD6	potassium channel tetramerization domain containing 6
7920744	2.39e-09	5.7e-11	-8.64063	14.806	-2.1112	PKLR	pyruvate kinase, liver and RBC
8121563	2.39e-09	5.7e-11	8.64043	14.8054	1.06099	MARCKS	myristoylated alanine rich protein kinase C substrate
8011396	2.44e-09	5.82e-11	-8.63397	14.7847	-1.05923	SHPK	sedoheptulokinase
7984263	2.44e-09	5.85e-11	-8.6327	14.7807	-1.37614	HACD3	3-hydroxyacyl-CoA dehydratase 3
8068761	2.55e-09	6.1e-11	8.61932	14.738	1.28611	ABCG1	ATP binding cassette subfamily G member 1
8101862	2.58e-09	6.2e-11	-8.61452	14.7227	-3.53716	ADH6	alcohol dehydrogenase 6 (class V)
8064245	2.59e-09	6.22e-11	-8.61372	14.7201	-0.71977	TCEA2	transcription elongation factor A2
8064613	2.7e-09	6.5e-11	-8.59959	14.675	-1.21478	SLC4A11	solute carrier family 4 member 11
8159008	2.72e-09	6.55e-11	-8.59737	14.6679	-0.691939	SURF2	surfeit 2
7913385	2.76e-09	6.65e-11	-8.59249	14.6523	-2.10527	RAP1GAP	RAP1 GTPase activating protein
8028955	2.76e-09	6.68e-11	-8.59151	14.6491	-0.946522	CYP2B7P	cytochrome P450 family 2 subfamily B member 7, pseudogene
8022320	2.78e-09	6.71e-11	8.58991	14.644	0.736083	NPIPB9///NPIPB5///NPIPB6///NPIPB3	nuclear pore complex interacting protein family member B9///nuclear pore complex interacting protein family member B5///nuclear pore complex interacting protein family member B6///nuclear pore complex interacting protein family member B3
7964271	2.83e-09	6.86e-11	8.5832	14.6226	0.720931	PRIM1	primase (DNA) subunit 1
8123864	2.9e-09	7.03e-11	-8.57521	14.597	-1.72384	TFAP2A	transcription factor AP-2 alpha
7981919	2.92e-09	7.1e-11	-8.57251	14.5884	-0.87667	SNURF///SNRPN	SNRPN upstream reading frame///small nuclear ribonucleoprotein polypeptide N
8007363	2.93e-09	7.14e-11	-8.57069	14.5826	-1.96619	WNK4	WNK lysine deficient protein kinase 4
8025328	2.93e-09	7.15e-11	-8.57019	14.581	-0.595818	EVI5L	ecotropic viral integration site 5 like
7939818	3.04e-09	7.42e-11	-8.55855	14.5437	-0.740385	PTPMT1	protein tyrosine phosphatase, mitochondrial 1
8060274	3.05e-09	7.46e-11	-8.55692	14.5385	-0.70036	THAP4	THAP domain containing 4
8077250	3.05e-09	7.46e-11	-8.55692	14.5385	-0.70036	THAP4	THAP domain containing 4
7999766	3.05e-09	7.48e-11	8.55626	14.5364	0.622011	PKD1P6-NPIPP1///NPIPA8///NPIPA7///NPIPA5///NPIPB5///NPIPB6///NPIPA2///NPIPA3///NPIPB4///PKD1P1///PDXDC2P///NPIPB3///NPIPA1///NPIPB5///NPIPB4///NPIPB3	PKD1P6-NPIPP1 readthrough///nuclear pore complex interacting protein family member A8///nuclear pore complex interacting protein family member A7///nuclear pore complex interacting protein family member A5///nuclear pore complex interacting protein family member B5///nuclear pore complex interacting protein family member B6///nuclear pore complex interacting protein family member A2///nuclear por…
7981960	3.08e-09	7.56e-11	-8.55276	14.5252	-1.5705	SNORD116-6	small nucleolar RNA, C/D box 116-6
8179049	3.1e-09	7.62e-11	8.5503	14.5173	0.793247	HLA-J///HLA-H///HLA-A///HLA-A	major histocompatibility complex, class I, J (pseudogene)///major histocompatibility complex, class I, H (pseudogene)///major histocompatibility complex, class I, A///major histocompatibility complex, class I, A
8073397	3.14e-09	7.75e-11	-8.5453	14.5013	-0.554032	ZC3H7B	zinc finger CCCH-type containing 7B
8105495	3.18e-09	7.84e-11	-8.54147	14.4891	-0.962057	PART1	prostate androgen-regulated transcript 1 (non-protein coding)
7939314	3.23e-09	7.99e-11	-8.53572	14.4707	-3.20145	EHF	ETS homologous factor
7959251	3.25e-09	8.06e-11	8.53279	14.4613	1.60207	P2RX7	purinergic receptor P2X 7
8041853	3.4e-09	8.44e-11	-8.51879	14.4164	-2.93456	EPCAM	epithelial cell adhesion molecule
8111629	3.41e-09	8.47e-11	8.51744	14.4121	0.742833	NUP155	nucleoporin 155
8074070	3.48e-09	8.69e-11	-8.50971	14.3874	-3.91635	MIOX	myo-inositol oxygenase
7997453	3.49e-09	8.72e-11	-8.50837	14.3831	-1.45254	PLCG2	phospholipase C gamma 2
8130768	3.49e-09	8.72e-11	8.50832	14.3829	2.15516	RNASET2	ribonuclease T2
8144669	3.51e-09	8.78e-11	-8.50626	14.3763	-0.793385	FDFT1///FDFT1	farnesyl-diphosphate farnesyltransferase 1///farnesyl-diphosphate farnesyltransferase 1
7898663	3.53e-09	8.83e-11	-8.50447	14.3706	-0.979566	PINK1	PTEN induced putative kinase 1
7958414	3.58e-09	8.98e-11	-8.49948	14.3546	-0.879486	ISCU	iron-sulfur cluster assembly enzyme
8143270	3.62e-09	9.08e-11	8.49582	14.3428	1.24878	ZC3HAV1L	zinc finger CCCH-type containing, antiviral 1 like
8125775	3.62e-09	9.11e-11	-8.49499	14.3402	-1.03259	UQCC2	ubiquinol-cytochrome c reductase complex assembly factor 2
7903369	3.78e-09	9.52e-11	8.48118	14.2959	0.594751	SLC30A7	solute carrier family 30 member 7
8039144	3.78e-09	9.55e-11	-8.48028	14.293	-1.91866	TMC4	transmembrane channel like 4
8158930	3.78e-09	9.55e-11	-8.48019	14.2927	-0.553187	SPACA9	sperm acrosome associated 9
7900888	3.85e-09	9.74e-11	-8.4743	14.2738	-1.16849	IPO13	importin 13
8099073	3.89e-09	9.84e-11	-8.47097	14.2631	-1.11788	LRPAP1	LDL receptor related protein associated protein 1
8085797	3.92e-09	9.95e-11	-8.46761	14.2523	-1.45963	THRB	thyroid hormone receptor beta
8028600	4.1e-09	1.04e-10	-8.45274	14.2046	-0.616786	NCCRP1	non-specific cytotoxic cell receptor protein 1 homolog (zebrafish)
8051464	4.12e-09	1.05e-10	8.45107	14.1992	0.511339	HEATR5B	HEAT repeat containing 5B
8030881	4.26e-09	1.09e-10	-8.43961	14.1625	-0.674402	PPP2R1A	protein phosphatase 2 scaffold subunit Aalpha
8087224	4.28e-09	1.09e-10	-8.4381	14.1576	-1.36543	SLC25A20	solute carrier family 25 member 20
7975851	4.3e-09	1.1e-10	-8.43593	14.1506	-0.763014	IFT43	intraflagellar transport 43
8034521	4.36e-09	1.12e-10	-8.4317	14.1371	-0.908356	HOOK2	hook microtubule tethering protein 2
8025586	4.43e-09	1.14e-10	-8.42564	14.1176	-0.677736	MRPL4	mitochondrial ribosomal protein L4
8088848	4.49e-09	1.16e-10	-8.421	14.1027	-1.58856	PDZRN3	PDZ domain containing ring finger 3
8056518	4.51e-09	1.16e-10	-8.41907	14.0965	-1.10482	SCN7A	sodium voltage-gated channel alpha subunit 7
7935627	4.62e-09	1.19e-10	-8.41145	14.072	-1.37327	GOT1	glutamic-oxaloacetic transaminase 1
7982002	4.7e-09	1.22e-10	-8.40493	14.051	-1.24334	SNORD116-27	small nucleolar RNA, C/D box 116-27
8045247	4.72e-09	1.22e-10	-8.40343	14.0462	-1.03228	PLEKHB2	pleckstrin homology domain containing B2
8139706	4.81e-09	1.25e-10	8.39681	14.0249	1.23851	SEC61G	Sec61 translocon gamma subunit
8106068	4.93e-09	1.28e-10	-8.38861	13.9986	-1.21541	MCCC2	methylcrotonoyl-CoA carboxylase 2
8177601	4.93e-09	1.28e-10	-8.38861	13.9986	-1.21541	MCCC2	methylcrotonoyl-CoA carboxylase 2
8175933	4.96e-09	1.29e-10	-8.3864	13.9914	-1.64898	RENBP	renin binding protein
7980605	4.97e-09	1.3e-10	-8.38546	13.9884	-0.777789	KCNK10	potassium two pore domain channel subfamily K member 10
7950796	4.98e-09	1.3e-10	8.38465	13.9858	0.583666	CREBZF	CREB/ATF bZIP transcription factor
7927179	4.98e-09	1.3e-10	-8.38402	13.9838	-2.34597	TMEM72	transmembrane protein 72
7901102	4.99e-09	1.31e-10	-8.38313	13.9809	-0.753648	MMACHC	methylmalonic aciduria (cobalamin deficiency) cblC type, with homocystinuria
7932498	5.05e-09	1.33e-10	-8.3789	13.9673	-0.500945	SKIDA1///SKIDA1///LOC219688	SKI/DACH domain containing 1///SKI/DACH domain containing 1///uncharacterized LOC219688
7934920	5.06e-09	1.33e-10	8.37786	13.964	1.52681	LIPA	lipase A, lysosomal acid type
8036151	5.06e-09	1.33e-10	-8.37785	13.9639	-1.71361	HSPB6	heat shock protein family B (small) member 6
7962783	5.08e-09	1.34e-10	-8.37647	13.9595	-0.663222	ASB8	ankyrin repeat and SOCS box containing 8
7962689	5.11e-09	1.35e-10	-8.37412	13.9519	-2.03665	VDR	vitamin D (1,25- dihydroxyvitamin D3) receptor
8088142	5.29e-09	1.39e-10	-8.36335	13.9173	-2.96684	CHDH	choline dehydrogenase
7934367	5.29e-09	1.4e-10	-8.36252	13.9146	-0.7482	ANXA7	annexin A7
7939298	5.3e-09	1.4e-10	-8.36191	13.9126	-1.34791	CAT	catalase
7948534	5.32e-09	1.41e-10	-8.36027	13.9074	-0.448154	DDB1	damage specific DNA binding protein 1
7897172	5.41e-09	1.43e-10	-8.35498	13.8903	-0.927581	TPRG1L	tumor protein p63 regulated 1-like
7916584	5.45e-09	1.44e-10	-8.35221	13.8814	-3.22642	TACSTD2	tumor-associated calcium signal transducer 2
7969881	5.51e-09	1.46e-10	8.34818	13.8684	0.544546	TPP2	tripeptidyl peptidase 2
8073842	5.63e-09	1.5e-10	-8.34122	13.846	-1.97504	TTC38	tetratricopeptide repeat domain 38
8121319	5.63e-09	1.5e-10	-8.341	13.8453	-0.93782	SOBP	sine oculis binding protein homolog
8128991	5.65e-09	1.51e-10	8.33956	13.8406	2.43359	LAMA4	laminin subunit alpha 4
8068401	5.75e-09	1.53e-10	-8.33409	13.823	-1.03539	CBR1	carbonyl reductase 1
8009014	5.82e-09	1.55e-10	8.33	13.8098	0.478837	TLK2	tousled like kinase 2
8126860	6.06e-09	1.62e-10	-8.31698	13.7679	-1.24238	MUT	methylmalonyl-CoA mutase
7958784	6.06e-09	1.62e-10	-8.31605	13.7649	-2.02474	ALDH2	aldehyde dehydrogenase 2 family (mitochondrial)
8034821	6.09e-09	1.63e-10	-8.31425	13.7591	-0.428853	PTGER1	prostaglandin E receptor 1
8018731	6.21e-09	1.67e-10	8.30711	13.7361	1.0965	RHBDF2	rhomboid 5 homolog 2
8092162	6.39e-09	1.72e-10	8.29832	13.7077	0.647545	PP13439	uncharacterized LOC100128046
8073578	6.4e-09	1.72e-10	-8.29756	13.7053	-1.08678	SMDT1	single-pass membrane protein with aspartate rich tail 1
8087691	6.4e-09	1.73e-10	-8.29684	13.7029	-0.502165	CACNA2D2	calcium voltage-gated channel auxiliary subunit alpha2delta 2
8064904	6.48e-09	1.75e-10	-8.29288	13.6902	-1.67113	FERMT1	fermitin family member 1
7994928	6.54e-09	1.77e-10	-8.28976	13.6801	-0.755239	PHKG2	phosphorylase kinase catalytic subunit gamma 2
8033960	6.62e-09	1.79e-10	-8.2855	13.6664	-0.669875	FDX1L	ferredoxin 1 like
8119648	6.82e-09	1.85e-10	-8.27591	13.6354	-0.818914	KLHDC3	kelch domain containing 3
8027932	6.84e-09	1.86e-10	-8.27489	13.6321	-0.821277	COX6B1	cytochrome c oxidase subunit 6B1
8077914	6.89e-09	1.87e-10	-8.27213	13.6232	-0.488249	TSEN2	tRNA splicing endonuclease subunit 2
8006336	6.89e-09	1.87e-10	8.27205	13.6229	0.993774	LRRC37B	leucine rich repeat containing 37B
8105084	6.92e-09	1.89e-10	-8.26993	13.6161	-4.96055	C7	complement component 7
8031097	6.97e-09	1.9e-10	-8.26719	13.6072	-0.976686	NDUFA3	NADH:ubiquinone oxidoreductase subunit A3
7912303	7.12e-09	1.95e-10	-8.25974	13.5832	-0.607704	DFFA	DNA fragmentation factor subunit alpha
8044143	7.12e-09	1.95e-10	-8.25971	13.5831	-1.98236	C2orf40	chromosome 2 open reading frame 40
8164596	7.13e-09	1.96e-10	-8.25858	13.5794	-0.872323	C9orf78	chromosome 9 open reading frame 78
8155554	7.16e-09	1.97e-10	-8.25718	13.5749	-1.64481	LOC102724507///LOC100509620///AQP7P1///AQP7	uncharacterized LOC102724507///putative aquaporin-7-like protein 3///aquaporin 7 pseudogene 1///aquaporin 7
8112746	7.19e-09	1.98e-10	8.25532	13.5689	0.672799	WDR41	WD repeat domain 41
7984405	7.26e-09	2e-10	-8.25229	13.5591	-0.709149	C15orf61	chromosome 15 open reading frame 61
7963786	7.27e-09	2e-10	8.25145	13.5564	1.99236	ITGA5	integrin subunit alpha 5
8049317	7.29e-09	2.01e-10	8.25013	13.5522	1.40536	DGKD	diacylglycerol kinase delta
8113733	7.32e-09	2.02e-10	8.24873	13.5476	0.698493	CEP120	centrosomal protein 120
7993404	7.4e-09	2.05e-10	8.24435	13.5335	0.690822	PKD1P6-NPIPP1///NPIPA8///NPIPA7///NPIPA5///NPIPB5///NPIPA2///NPIPA3///NPIPB4///PKD1P1///PDXDC2P///PKD1P2///NPIPB3///NPIPA1///PKD1///NPIPB5///NPIPB4///NPIPB3	PKD1P6-NPIPP1 readthrough///nuclear pore complex interacting protein family member A8///nuclear pore complex interacting protein family member A7///nuclear pore complex interacting protein family member A5///nuclear pore complex interacting protein family member B5///nuclear pore complex interacting protein family member A2///nuclear pore complex interacting protein family member A3///nuclear por…
8117207	7.45e-09	2.06e-10	-8.24222	13.5266	-1.42276	ALDH5A1	aldehyde dehydrogenase 5 family member A1
8038556	7.51e-09	2.09e-10	-8.23912	13.5166	-2.93748	NAPSA	napsin A aspartic peptidase
7994559	7.55e-09	2.1e-10	8.23713	13.5101	0.711659	NPIPB9///NPIPB5///NPIPB6///PDXDC2P///NPIPB3///NPIPB5///NPIPB4///NPIPB3	nuclear pore complex interacting protein family member B9///nuclear pore complex interacting protein family member B5///nuclear pore complex interacting protein family member B6///pyridoxal dependent decarboxylase domain containing 2, pseudogene///nuclear pore complex interacting protein family member B3///nuclear pore complex interacting protein family member B5///nuclear pore complex interactin…
8141872	7.58e-09	2.11e-10	-8.23538	13.5045	-1.11477	NAPEPLD	N-acyl phosphatidylethanolamine phospholipase D
7945071	7.76e-09	2.17e-10	-8.22717	13.478	-1.08761	FOXRED1	FAD dependent oxidoreductase domain containing 1
8160504	7.86e-09	2.2e-10	-8.22317	13.4651	-2.80386	LRRC19	leucine rich repeat containing 19
7926152	7.93e-09	2.22e-10	-8.21976	13.454	-2.09663	ECHDC3	enoyl-CoA hydratase domain containing 3
7909561	7.96e-09	2.23e-10	-8.21812	13.4487	-0.768136	LINC00467	long intergenic non-protein coding RNA 467
8027996	8.01e-09	2.25e-10	-8.2157	13.4409	-0.748515	PSENEN	presenilin enhancer gamma-secretase subunit
7938390	8.11e-09	2.28e-10	8.21161	13.4277	2.16508	ADM	adrenomedullin
7923812	8.18e-09	2.3e-10	-8.20836	13.4172	-1.66901	RAB29	RAB29, member RAS oncogene family
8009844	8.3e-09	2.34e-10	-8.20363	13.4019	-1.60724	LLGL2	LLGL2, scribble cell polarity complex component
7970546	8.34e-09	2.36e-10	-8.20154	13.3951	-0.837022	MICU2	mitochondrial calcium uptake 2
8080416	8.34e-09	2.36e-10	-8.2012	13.394	-0.556616	SMIM4	small integral membrane protein 4
8052721	8.34e-09	2.36e-10	8.20117	13.3939	0.613113	PPP3R1	protein phosphatase 3 regulatory subunit B, alpha
8103769	8.34e-09	2.36e-10	-8.20075	13.3925	-2.85247	HPGD	hydroxyprostaglandin dehydrogenase 15-(NAD)
8114814	8.48e-09	2.4e-10	8.19537	13.3751	0.805956	NR3C1	nuclear receptor subfamily 3 group C member 1
8011375	8.51e-09	2.41e-10	-8.19415	13.3712	-0.830579	TRPV1	transient receptor potential cation channel subfamily V member 1
8165794	8.51e-09	2.42e-10	8.19336	13.3686	1.00477	CD99	CD99 molecule
8176360	8.51e-09	2.42e-10	8.19336	13.3686	1.00477	CD99	CD99 molecule
7971653	8.58e-09	2.44e-10	8.19042	13.3591	1.14352	DLEU2	deleted in lymphocytic leukemia 2 (non-protein coding)
8140504	8.58e-09	2.45e-10	-8.19012	13.3582	-1.74053	MAGI2	membrane associated guanylate kinase, WW and PDZ domain containing 2
7993349	8.6e-09	2.45e-10	8.1893	13.3555	0.697445	PKD1P6-NPIPP1///NPIPA8///NPIPA7///NPIPA5///NPIPB5///NPIPA2///NPIPA3///NPIPB4///PKD1P1///PDXDC2P///NPIPB3///NPIPA1///NPIPB5///NPIPB4///NPIPB3	PKD1P6-NPIPP1 readthrough///nuclear pore complex interacting protein family member A8///nuclear pore complex interacting protein family member A7///nuclear pore complex interacting protein family member A5///nuclear pore complex interacting protein family member B5///nuclear pore complex interacting protein family member A2///nuclear pore complex interacting protein family member A3///nuclear por…
8171041	8.68e-09	2.48e-10	-8.18565	13.3437	-0.668467	VAMP7	vesicle associated membrane protein 7
8176962	8.68e-09	2.48e-10	-8.18565	13.3437	-0.668467	VAMP7	vesicle associated membrane protein 7
7981996	8.75e-09	2.51e-10	-8.1826	13.3338	-1.17255	SNORD116-24	small nucleolar RNA, C/D box 116-24
7959153	8.85e-09	2.54e-10	-8.17841	13.3203	-0.980551	COX6A1	cytochrome c oxidase subunit 6A1
8022646	8.9e-09	2.56e-10	-8.17626	13.3133	-1.36468	KCTD1	potassium channel tetramerization domain containing 1
8082673	9.04e-09	2.6e-10	-8.1709	13.2959	-2.92432	ACPP	acid phosphatase, prostate
7932094	9.08e-09	2.62e-10	-8.16916	13.2903	-1.78824	PHYH	phytanoyl-CoA 2-hydroxylase
7984588	9.22e-09	2.66e-10	-8.16429	13.2745	-1.2095	THSD4	thrombospondin type 1 domain containing 4
8122843	9.33e-09	2.7e-10	-8.15991	13.2604	-0.870568	ESR1	estrogen receptor 1
8114300	9.33e-09	2.7e-10	-8.15987	13.2602	-1.95432	KLHL3	kelch like family member 3
8001764	9.39e-09	2.72e-10	-8.15751	13.2526	-1.0181	GOT2	glutamic-oxaloacetic transaminase 2
7998762	9.4e-09	2.72e-10	-8.15704	13.2511	-1.02679	ECI1	enoyl-CoA delta isomerase 1
7946478	9.4e-09	2.73e-10	8.15677	13.2502	0.826585	DENND5A	DENN domain containing 5A
8156116	9.44e-09	2.74e-10	-8.15505	13.2446	-1.15164	IDNK	IDNK, gluconokinase
8025296	9.44e-09	2.74e-10	-8.15482	13.2439	-0.548333	TRAPPC5	trafficking protein particle complex 5
8086183	9.49e-09	2.76e-10	-8.1527	13.237	-0.762829	LOC152048	uncharacterized FLJ31715
7957759	9.76e-09	2.84e-10	8.14405	13.209	1.01065	APAF1	apoptotic peptidase activating factor 1
8117813	9.76e-09	2.85e-10	8.14365	13.2077	0.691756	HLA-J///HLA-H///HLA-B///HLA-A///HLA-A	major histocompatibility complex, class I, J (pseudogene)///major histocompatibility complex, class I, H (pseudogene)///major histocompatibility complex, class I, B///major histocompatibility complex, class I, A///major histocompatibility complex, class I, A
7959408	9.77e-09	2.85e-10	8.14305	13.2057	1.01321	KNTC1	kinetochore associated 1
8179041	9.89e-09	2.9e-10	8.1383	13.1904	0.69509	HLA-H///HLA-C///HLA-B///HLA-A///HLA-B///HLA-A	major histocompatibility complex, class I, H (pseudogene)///major histocompatibility complex, class I, C///major histocompatibility complex, class I, B///major histocompatibility complex, class I, A///major histocompatibility complex, class I, B///major histocompatibility complex, class I, A
7999634	9.89e-09	2.9e-10	8.1382	13.19	0.783733	PKD1P6-NPIPP1///NPIPA8///NPIPA7///NPIPA5///NPIPA2///NPIPA3///PKD1P1///NPIPA1	PKD1P6-NPIPP1 readthrough///nuclear pore complex interacting protein family member A8///nuclear pore complex interacting protein family member A7///nuclear pore complex interacting protein family member A5///nuclear pore complex interacting protein family member A2///nuclear pore complex interacting protein family member A3///polycystin 1, transient receptor potential channel interacting pseudoge…
7997239	9.94e-09	2.91e-10	8.13646	13.1844	0.718958	NPIPB9///NPIPB5///NPIPB6///PDXDC2P///NPIPB3	nuclear pore complex interacting protein family member B9///nuclear pore complex interacting protein family member B5///nuclear pore complex interacting protein family member B6///pyridoxal dependent decarboxylase domain containing 2, pseudogene///nuclear pore complex interacting protein family member B3
8094574	9.95e-09	2.92e-10	-8.13592	13.1826	-0.743442	TBC1D1	TBC1 domain family member 1
7903803	9.96e-09	2.93e-10	-8.13501	13.1797	-0.645991	AHCYL1	adenosylhomocysteinase like 1
8070933	1e-08	2.94e-10	-8.13346	13.1747	-2.37135	FTCD	formimidoyltransferase cyclodeaminase
8121825	1e-08	2.95e-10	8.13257	13.1718	1.2552	RNF217	ring finger protein 217
8159732	1e-08	2.95e-10	8.13234	13.171	0.864968	EHMT1-IT1	EHMT1 intronic transcript 1
7981988	1.02e-08	3e-10	-8.12703	13.1538	-0.772279	SNORD116-20	small nucleolar RNA, C/D box 116-20
8171901	1.02e-08	3.01e-10	-8.12639	13.1518	-0.515888	TAB3	TGF-beta activated kinase 1/MAP3K7 binding protein 3
7934477	1.03e-08	3.04e-10	-8.12373	13.1431	-0.927873	CAMK2G	calcium/calmodulin dependent protein kinase II gamma
8060895	1.06e-08	3.13e-10	8.11421	13.1123	1.18527	RNU105B	RNA, U105B small nucleolar
8027354	1.07e-08	3.16e-10	-8.11141	13.1032	-0.779063	RPSAP58	ribosomal protein SA pseudogene 58
7971246	1.07e-08	3.16e-10	-8.11111	13.1022	-0.905766	VWA8	von Willebrand factor A domain containing 8
8148476	1.07e-08	3.18e-10	8.10989	13.0983	1.22894	DENND3	DENN domain containing 3
7972180	1.08e-08	3.2e-10	8.1072	13.0895	0.943821	RNF219	ring finger protein 219
8164464	1.08e-08	3.23e-10	-8.10526	13.0832	-0.899406	ZER1	zyg-11 related cell cycle regulator
7993359	1.09e-08	3.25e-10	8.10308	13.0762	0.687849	PKD1P6-NPIPP1///NPIPA8///NPIPA7///NPIPA5///NPIPB5///NPIPA2///NPIPA3///NPIPB4///PKD1P1///PDXDC2P///NPIPB3///NPIPA1///NPIPB5///NPIPB4///NPIPB3	PKD1P6-NPIPP1 readthrough///nuclear pore complex interacting protein family member A8///nuclear pore complex interacting protein family member A7///nuclear pore complex interacting protein family member A5///nuclear pore complex interacting protein family member B5///nuclear pore complex interacting protein family member A2///nuclear pore complex interacting protein family member A3///nuclear por…
7978595	1.09e-08	3.25e-10	8.10303	13.076	1.19034	BAZ1A	bromodomain adjacent to zinc finger domain 1A
8132860	1.1e-08	3.3e-10	8.0986	13.0616	1.53741	EGFR	epidermal growth factor receptor
8141765	1.12e-08	3.36e-10	8.09313	13.0439	1.23353	LOC102724229	uncharacterized LOC102724229
8041763	1.13e-08	3.39e-10	-8.09026	13.0346	-0.649014	PRKCE	protein kinase C epsilon
8165947	1.14e-08	3.4e-10	8.08873	13.0296	0.832117	WWC3	WWC family member 3
8077770	1.15e-08	3.44e-10	-8.08583	13.0202	-0.548625	BRK1	BRICK1, SCAR/WAVE actin nucleating complex subunit
7998825	1.18e-08	3.54e-10	-8.07651	12.99	-0.789177	PDPK1	3-phosphoinositide dependent protein kinase 1
8000537	1.18e-08	3.55e-10	8.07619	12.9889	0.723693	NPIPB9///NPIPB5///NPIPB6///PDXDC2P///NPIPB3	nuclear pore complex interacting protein family member B9///nuclear pore complex interacting protein family member B5///nuclear pore complex interacting protein family member B6///pyridoxal dependent decarboxylase domain containing 2, pseudogene///nuclear pore complex interacting protein family member B3
7966462	1.18e-08	3.56e-10	8.07519	12.9857	0.704817	NAA25	N(alpha)-acetyltransferase 25, NatB auxiliary subunit
8171653	1.19e-08	3.59e-10	-8.07244	12.9768	-0.977708	MAP3K15	mitogen-activated protein kinase kinase kinase 15
8023955	1.19e-08	3.6e-10	-8.07122	12.9728	-1.0001	BSG	basigin (Ok blood group)
7928401	1.21e-08	3.66e-10	-8.06682	12.9585	-0.74018	CHCHD1	coiled-coil-helix-coiled-coil-helix domain containing 1
8086615	1.21e-08	3.68e-10	-8.06504	12.9527	-1.05481	LRRC2	leucine rich repeat containing 2
7950764	1.22e-08	3.71e-10	-8.06268	12.945	-0.694048	DLG2	discs large MAGUK scaffold protein 2
8152867	1.22e-08	3.71e-10	8.0626	12.9448	1.14083	ASAP1	ArfGAP with SH3 domain, ankyrin repeat and PH domain 1
7982688	1.22e-08	3.72e-10	-8.06182	12.9423	-0.509159	BUB1B-PAK6///PAK6	BUB1B-PAK6 readthrough///p21 (RAC1) activated kinase 6
8111887	1.23e-08	3.75e-10	-8.05907	12.9333	-1.6529	PLCXD3	phosphatidylinositol specific phospholipase C X domain containing 3
8000501	1.25e-08	3.81e-10	8.05429	12.9178	0.73567	NPIPB9///NPIPB5///NPIPB6///PDXDC2P///NPIPB3	nuclear pore complex interacting protein family member B9///nuclear pore complex interacting protein family member B5///nuclear pore complex interacting protein family member B6///pyridoxal dependent decarboxylase domain containing 2, pseudogene///nuclear pore complex interacting protein family member B3
7903980	1.26e-08	3.85e-10	8.05112	12.9075	2.08228	C1orf162	chromosome 1 open reading frame 162
8060805	1.26e-08	3.85e-10	-8.05074	12.9063	-1.44258	CHGB	chromogranin B
8032455	1.27e-08	3.87e-10	-8.04957	12.9025	-0.736097	PLEKHJ1	pleckstrin homology domain containing J1
7897044	1.27e-08	3.88e-10	-8.04881	12.9	-0.94391	PRKCZ	protein kinase C zeta
8179731	1.28e-08	3.92e-10	8.04538	12.8889	0.722433	HLA-C///HLA-B///HLA-C///HLA-B	major histocompatibility complex, class I, C///major histocompatibility complex, class I, B///major histocompatibility complex, class I, C///major histocompatibility complex, class I, B
7952526	1.29e-08	3.97e-10	8.04153	12.8764	1.96254	CDON	cell adhesion associated, oncogene regulated
7948829	1.3e-08	4e-10	-8.03939	12.8694	-0.526362	ZBTB3	zinc finger and BTB domain containing 3
8008885	1.31e-08	4.03e-10	8.03719	12.8623	2.9595	MIR21	microRNA 21
8162940	1.36e-08	4.2e-10	8.02426	12.8202	1.61015	ABCA1	ATP binding cassette subfamily A member 1
8023361	1.38e-08	4.26e-10	-8.01986	12.8059	-2.33698	MRO	maestro
8063590	1.38e-08	4.28e-10	-8.019	12.8031	-4.55138	PCK1	phosphoenolpyruvate carboxykinase 1
8005736	1.38e-08	4.28e-10	-8.01839	12.8011	-0.558152	UBBP4	ubiquitin B pseudogene 4
8125149	1.39e-08	4.32e-10	-8.01617	12.7939	-2.8466	SLC44A4	solute carrier family 44 member 4
8178653	1.39e-08	4.32e-10	-8.01617	12.7939	-2.8466	SLC44A4	solute carrier family 44 member 4
8179861	1.39e-08	4.32e-10	-8.01617	12.7939	-2.8466	SLC44A4	solute carrier family 44 member 4
8155442	1.39e-08	4.33e-10	-8.01524	12.7909	-1.65083	LOC102724507///LOC100509620///AQP7P1///AQP7	uncharacterized LOC102724507///putative aquaporin-7-like protein 3///aquaporin 7 pseudogene 1///aquaporin 7
7901110	1.42e-08	4.42e-10	-8.00902	12.7707	-1.48836	AKR1A1	aldo-keto reductase family 1 member A1
8027128	1.42e-08	4.43e-10	-8.00811	12.7677	-1.46339	SLC25A42	solute carrier family 25 member 42
7923942	1.43e-08	4.45e-10	-8.00658	12.7627	-2.05189	FCAMR	Fc fragment of IgA and IgM receptor
8027074	1.45e-08	4.51e-10	-8.00247	12.7494	-0.573786	UPF1	UPF1, RNA helicase and ATPase
7965681	1.45e-08	4.52e-10	8.00176	12.7471	1.10554	IKBIP	IKBKB interacting protein
8158771	1.45e-08	4.54e-10	-8.00047	12.7429	-2.53525	AIF1L	allograft inflammatory factor 1 like
7992646	1.47e-08	4.59e-10	-7.99755	12.7334	-0.680593	ATP6V0C	ATPase H+ transporting V0 subunit c
7973510	1.47e-08	4.59e-10	-7.99712	12.732	-2.26279	CPNE6	copine 6
8054611	1.51e-08	4.75e-10	7.98709	12.6994	1.55492	MIR4435-2HG///LINC00152	MIR4435-2 host gene///long intergenic non-protein coding RNA 152
7913156	1.52e-08	4.78e-10	-7.98468	12.6915	-1.27262	AKR7A2	aldo-keto reductase family 7 member A2
7934997	1.53e-08	4.81e-10	7.98289	12.6857	2.47916	PPP1R3C	protein phosphatase 1 regulatory subunit 3C
7941707	1.55e-08	4.88e-10	7.97877	12.6723	0.669886	RBM14	RNA binding motif protein 14
7981514	1.56e-08	4.92e-10	7.97604	12.6634	3.09311	AHNAK2	AHNAK nucleoprotein 2
7939825	1.56e-08	4.93e-10	-7.97558	12.6619	-0.63835	NDUFS3	NADH:ubiquinone oxidoreductase core subunit S3
8173825	1.58e-08	5.01e-10	-7.97083	12.6464	-2.28342	RPS6KA6	ribosomal protein S6 kinase A6
8161488	1.6e-08	5.05e-10	-7.96804	12.6373	-1.58929	LOC102724507///LOC100509620///AQP7P1///AQP7	uncharacterized LOC102724507///putative aquaporin-7-like protein 3///aquaporin 7 pseudogene 1///aquaporin 7
8001587	1.61e-08	5.09e-10	-7.96558	12.6293	-0.700017	KIFC3	kinesin family member C3
7994006	1.62e-08	5.13e-10	7.96342	12.6223	0.543523	BOLA2-SMG1P6///SMG1P3///SMG1P1///SMG1P5///BOLA2///SMG1P2///SMG1	BOLA2-SMG1P6 readthrough///SMG1P3, nonsense mediated mRNA decay associated PI3K related kinase pseudogene 3///SMG1P1, nonsense mediated mRNA decay associated PI3K related kinase pseudogene 1///SMG1P5, nonsense mediated mRNA decay associated PI3K related kinase pseudogene 5///bolA family member 2///SMG1P2, nonsense mediated mRNA decay associated PI3K related kinase pseudogene 2///SMG1, nonsense me…
7925480	1.63e-08	5.17e-10	-7.96119	12.615	-0.946392	FH	fumarate hydratase
7931852	1.63e-08	5.18e-10	-7.96037	12.6124	-0.774404	TUBAL3	tubulin alpha like 3
8102619	1.63e-08	5.19e-10	7.95976	12.6104	0.748007	ANXA5	annexin A5
8119153	1.68e-08	5.35e-10	-7.95051	12.5803	-0.934403	COX6A1	cytochrome c oxidase subunit 6A1
7990151	1.69e-08	5.38e-10	7.94883	12.5748	1.02804	PKM	pyruvate kinase, muscle
8079334	1.69e-08	5.39e-10	7.9483	12.5731	0.85281	LIMD1	LIM domains containing 1
7919055	1.69e-08	5.4e-10	-7.94771	12.5711	-3.55438	HMGCS2	3-hydroxy-3-methylglutaryl-CoA synthase 2
8144953	1.69e-08	5.4e-10	-7.94764	12.5709	-0.506274	XPO7	exportin 7
7994280	1.69e-08	5.41e-10	7.94694	12.5686	1.08447	IL4R	interleukin 4 receptor
8043363	1.7e-08	5.44e-10	7.94565	12.5644	1.57683	MIR4435-2HG///LINC00152	MIR4435-2 host gene///long intergenic non-protein coding RNA 152
8159667	1.71e-08	5.47e-10	7.94375	12.5583	0.680304	TOR4A	torsin family 4 member A
8088151	1.72e-08	5.53e-10	-7.94063	12.5481	-0.757819	ACTR8	ARP8 actin-related protein 8 homolog
8135594	1.73e-08	5.54e-10	7.93968	12.545	2.13833	CAV1	caveolin 1
7993756	1.74e-08	5.6e-10	-7.93677	12.5355	-2.39274	ACSM3	acyl-CoA synthetase medium-chain family member 3
8134018	1.74e-08	5.61e-10	-7.93605	12.5332	-1.9147	ZNF804B	zinc finger protein 804B
7921840	1.75e-08	5.63e-10	-7.93481	12.5291	-1.13554	NR1I3	nuclear receptor subfamily 1 group I member 3
8084739	1.76e-08	5.66e-10	7.93314	12.5237	0.910364	FLJ42393	uncharacterized LOC401105
8037152	1.78e-08	5.76e-10	-7.92821	12.5076	-0.482198	GSK3A	glycogen synthase kinase 3 alpha
8003953	1.82e-08	5.89e-10	-7.9212	12.4848	-0.907769	PSMB6	proteasome subunit beta 6
7934278	1.82e-08	5.9e-10	7.92075	12.4833	1.29236	P4HA1///P4HA1	prolyl 4-hydroxylase subunit alpha 1///prolyl 4-hydroxylase subunit alpha 1
8061138	1.83e-08	5.93e-10	-7.91902	12.4777	-0.575069	PET117///KAT14	PET117 homolog///lysine acetyltransferase 14
7997582	1.84e-08	5.98e-10	-7.91668	12.47	-0.864785	WFDC1	WAP four-disulfide core domain 1
8017736	1.86e-08	6.03e-10	7.91412	12.4617	0.741853	CEP112	centrosomal protein 112
7942453	1.86e-08	6.04e-10	-7.91374	12.4605	-0.99952	PLEKHB1	pleckstrin homology domain containing B1
8036176	1.87e-08	6.08e-10	-7.91159	12.4534	-1.3057	NPHS1	NPHS1, nephrin
8000834	1.88e-08	6.11e-10	7.9099	12.4479	0.552135	BOLA2-SMG1P6///LOC101060386///SMG1P3///SMG1P1///SMG1P5///BOLA2///SMG1P2///SMG1	BOLA2-SMG1P6 readthrough///putative uncharacterized SMG1-like protein///SMG1P3, nonsense mediated mRNA decay associated PI3K related kinase pseudogene 3///SMG1P1, nonsense mediated mRNA decay associated PI3K related kinase pseudogene 1///SMG1P5, nonsense mediated mRNA decay associated PI3K related kinase pseudogene 5///bolA family member 2///SMG1P2, nonsense mediated mRNA decay associated PI3K re…
8143663	1.9e-08	6.2e-10	7.90579	12.4345	1.12866	EZH2	enhancer of zeste 2 polycomb repressive complex 2 subunit
8014081	1.92e-08	6.27e-10	7.90218	12.4228	0.653503	UTP6	UTP6, small subunit processome component
8149324	1.99e-08	6.51e-10	-7.8909	12.386	-0.830065	FAM167A	family with sequence similarity 167 member A
8088415	2e-08	6.54e-10	-7.88914	12.3802	-1.09435	FAM107A	family with sequence similarity 107 member A
7923929	2.01e-08	6.58e-10	-7.88742	12.3746	-4.55521	PIGR	polymeric immunoglobulin receptor
8086949	2.03e-08	6.66e-10	-7.88376	12.3627	-0.547436	CCDC51	coiled-coil domain containing 51
8133788	2.04e-08	6.7e-10	7.88183	12.3564	0.973254	PTPN12	protein tyrosine phosphatase, non-receptor type 12
7913883	2.04e-08	6.7e-10	-7.88178	12.3562	-0.748238	PAFAH2	platelet activating factor acetylhydrolase 2
8124911	2.06e-08	6.78e-10	7.87828	12.3448	0.791913	HLA-C///HLA-B///HLA-B	major histocompatibility complex, class I, C///major histocompatibility complex, class I, B///major histocompatibility complex, class I, B
8024003	2.08e-08	6.83e-10	-7.87598	12.3373	-0.606148	PALM	paralemmin
8115734	2.08e-08	6.84e-10	7.87578	12.3367	2.0555	LCP2	lymphocyte cytosolic protein 2
7920354	2.08e-08	6.85e-10	7.8752	12.3348	0.62991	DENND4B	DENN domain containing 4B
7925978	2.08e-08	6.87e-10	7.87428	12.3317	0.669295	FAM208B	family with sequence similarity 208 member B
8045018	2.09e-08	6.92e-10	-7.87225	12.3251	-2.17553	PROC	protein C, inactivator of coagulation factors Va and VIIIa
7924582	2.13e-08	7.06e-10	7.8662	12.3054	0.502138	WDR26	WD repeat domain 26
8026806	2.16e-08	7.16e-10	7.86167	12.2906	1.10791	COLGALT1	collagen beta(1-O)galactosyltransferase 1
8123137	2.16e-08	7.17e-10	-7.86131	12.2894	-0.713562	ACAT2	acetyl-CoA acetyltransferase 2
7957277	2.17e-08	7.18e-10	7.86077	12.2876	0.553424	ZDHHC17	zinc finger DHHC-type containing 17
8171392	2.18e-08	7.25e-10	-7.85795	12.2784	-0.824762	ASB9	ankyrin repeat and SOCS box containing 9
7992934	2.2e-08	7.33e-10	-7.85471	12.2679	-1.43837	DNASE1	deoxyribonuclease 1
8108435	2.21e-08	7.36e-10	7.85342	12.2637	0.905758	UBE2D2	ubiquitin conjugating enzyme E2 D2
8017776	2.23e-08	7.42e-10	7.8508	12.2551	0.459468	HELZ	helicase with zinc finger
7998267	2.29e-08	7.65e-10	-7.84161	12.2251	-0.933225	JMJD8	jumonji domain containing 8
8000167	2.33e-08	7.8e-10	7.83571	12.2058	0.616495	BOLA2-SMG1P6///LOC101060386///SMG1P3///SMG1P1///SMG1P5///BOLA2///SMG1P2///SLC7A5P2///SMG1	BOLA2-SMG1P6 readthrough///putative uncharacterized SMG1-like protein///SMG1P3, nonsense mediated mRNA decay associated PI3K related kinase pseudogene 3///SMG1P1, nonsense mediated mRNA decay associated PI3K related kinase pseudogene 1///SMG1P5, nonsense mediated mRNA decay associated PI3K related kinase pseudogene 5///bolA family member 2///SMG1P2, nonsense mediated mRNA decay associated PI3K re…
8102006	2.34e-08	7.85e-10	7.83386	12.1998	0.909798	MANBA	mannosidase beta
7977803	2.36e-08	7.9e-10	-7.83186	12.1933	-0.88864	RBM23	RNA binding motif protein 23
8102141	2.4e-08	8.05e-10	-7.82616	12.1746	-0.578291	PPA2///PPA2	pyrophosphatase (inorganic) 2///pyrophosphatase (inorganic) 2
7981538	2.4e-08	8.05e-10	7.82597	12.174	1.14936	JAG2	jagged 2
7980309	2.43e-08	8.18e-10	-7.82104	12.1579	-0.793504	C14orf1	chromosome 14 open reading frame 1
7981998	2.43e-08	8.19e-10	-7.8207	12.1568	-1.83768	SNORD116-25	small nucleolar RNA, C/D box 116-25
8065817	2.47e-08	8.33e-10	-7.81562	12.1402	-1.03395	GSS	glutathione synthetase
8108099	2.47e-08	8.34e-10	7.81523	12.1389	0.891279	SEC24A	SEC24 homolog A, COPII coat complex component
8000192	2.48e-08	8.37e-10	7.81416	12.1354	0.645859	LOC101060405///RRN3P3///RRN3P1///RRN3P2///RRN3	putative RRN3-like protein RRN3P1///RRN3 homolog, RNA polymerase I transcription factor pseudogene 3///RRN3 homolog, RNA polymerase I transcription factor pseudogene 1///RRN3 homolog, RNA polymerase I transcription factor pseudogene 2///RRN3 homolog, RNA polymerase I transcription factor
8077663	2.49e-08	8.41e-10	-7.8126	12.1303	-0.874959	JAGN1	jagunal homolog 1
8172813	2.49e-08	8.42e-10	7.81227	12.1292	0.652944	FAM156B///FAM156A	family with sequence similarity 156 member B///family with sequence similarity 156 member A
8132013	2.5e-08	8.48e-10	-7.81017	12.1224	-1.36143	CHN2	chimerin 2
7972888	2.51e-08	8.51e-10	7.80914	12.119	1.15795	PCID2	PCI domain containing 2
8079931	2.54e-08	8.62e-10	-7.8054	12.1068	-1.85257	SLC38A3	solute carrier family 38 member 3
8171587	2.54e-08	8.64e-10	7.8047	12.1045	1.63431	PHKA2	phosphorylase kinase regulatory subunit alpha 2
8037537	2.54e-08	8.66e-10	-7.80392	12.102	-0.854358	ERCC2	ERCC excision repair 2, TFIIH core complex helicase subunit
8081740	2.55e-08	8.68e-10	-7.80324	12.0997	-1.01391	ATP6V1A	ATPase H+ transporting V1 subunit A
8178498	2.56e-08	8.74e-10	7.80112	12.0928	0.767194	HLA-C///HLA-B///HLA-B	major histocompatibility complex, class I, C///major histocompatibility complex, class I, B///major histocompatibility complex, class I, B
7957746	2.6e-08	8.88e-10	-7.79636	12.0773	-0.494678	SLC25A3	solute carrier family 25 member 3
7942774	2.62e-08	8.95e-10	-7.79376	12.0687	-0.727888	AQP11	aquaporin 11
7955358	2.63e-08	9.01e-10	-7.79191	12.0627	-0.912824	COX14	COX14, cytochrome c oxidase assembly factor
8086961	2.68e-08	9.18e-10	7.78615	12.0439	1.33239	PFKFB4	6-phosphofructo-2-kinase/fructose-2,6-biphosphatase 4
8053406	2.7e-08	9.25e-10	-7.78376	12.0361	-1.21489	RETSAT	retinol saturase
8175195	2.71e-08	9.32e-10	-7.78155	12.0288	-0.649511	HS6ST2	heparan sulfate 6-O-sulfotransferase 2
8133818	2.71e-08	9.33e-10	7.78122	12.0277	0.816623	PHTF2	putative homeodomain transcription factor 2
8073826	2.72e-08	9.36e-10	-7.7801	12.0241	-1.27108	PPARA	peroxisome proliferator activated receptor alpha
7980080	2.73e-08	9.41e-10	-7.77861	12.0192	-2.11191	ENTPD5	ectonucleoside triphosphate diphosphohydrolase 5
8130013	2.82e-08	9.74e-10	-7.7682	11.9852	-0.818841	EPM2A	epilepsy, progressive myoclonus type 2A, Lafora disease (laforin)
8085263	2.82e-08	9.75e-10	-7.76786	11.984	-0.794864	EMC3	ER membrane protein complex subunit 3
8149733	2.82e-08	9.76e-10	7.76768	11.9834	1.25206	TNFRSF10B	TNF receptor superfamily member 10b
8032588	2.82e-08	9.77e-10	-7.76716	11.9818	-2.77462	SMIM24	small integral membrane protein 24
7979179	2.87e-08	9.93e-10	7.7622	11.9655	1.4968	ERO1A	endoplasmic reticulum oxidoreductase 1 alpha
8142415	2.89e-08	1e-09	7.75988	11.9579	0.606703	BMT2	base methyltransferase of 25S rRNA 2 homolog
7949765	2.9e-08	1.01e-09	-7.75812	11.9522	-0.714731	PPP1CA	protein phosphatase 1 catalytic subunit alpha
8047300	2.94e-08	1.02e-09	-7.75305	11.9356	-3.28824	AOX1	aldehyde oxidase 1
8174513	2.95e-08	1.03e-09	-7.75252	11.9339	-2.67737	CHRDL1	chordin like 1
8112331	2.95e-08	1.03e-09	-7.75124	11.9297	-0.893743	ISCA1	iron-sulfur cluster assembly 1
7989224	2.97e-08	1.04e-09	7.74928	11.9232	0.745883	ADAM10	ADAM metallopeptidase domain 10
8125713	2.97e-08	1.04e-09	7.74859	11.921	1.10117	TAPBP	TAP binding protein (tapasin)
8036224	2.97e-08	1.04e-09	7.74831	11.9201	1.51856	TYROBP	TYRO protein tyrosine kinase binding protein
8167356	2.97e-08	1.04e-09	-7.74812	11.9194	-0.901584	GLOD5	glyoxalase domain containing 5
8071516	2.99e-08	1.05e-09	-7.7465	11.9141	-0.522382	BCRP2///BCR	breakpoint cluster region pseudogene 2///BCR, RhoGEF and GTPase activating protein
8105191	3e-08	1.05e-09	7.74478	11.9085	1.17748	PARP8	poly(ADP-ribose) polymerase family member 8
8100109	3.05e-08	1.07e-09	-7.73982	11.8923	-1.49896	GABRA2	gamma-aminobutyric acid type A receptor alpha2 subunit
8054614	3.06e-08	1.07e-09	7.73878	11.8889	0.433268	ANAPC1P1///LOC285074///ANAPC1	anaphase promoting complex subunit 1 pseudogene 1///anaphase promoting complex subunit 1 pseudogene///anaphase promoting complex subunit 1
8087283	3.08e-08	1.08e-09	-7.73618	11.8803	-0.602216	QARS	glutaminyl-tRNA synthetase
8091385	3.08e-08	1.08e-09	7.73591	11.8795	4.5381	CP	ceruloplasmin (ferroxidase)
7993458	3.08e-08	1.08e-09	-7.73576	11.879	-0.770794	C16orf45	chromosome 16 open reading frame 45
8144253	3.08e-08	1.08e-09	-7.73567	11.8787	-0.516448	DLGAP2	DLG associated protein 2
8162264	3.08e-08	1.09e-09	-7.73523	11.8772	-0.705505	AUH	AU RNA binding methylglutaconyl-CoA hydratase
8013341	3.12e-08	1.1e-09	-7.73114	11.8638	-2.39579	MFAP4	microfibrillar associated protein 4
8012823	3.12e-08	1.1e-09	-7.73111	11.8638	-0.64243	SCO1	SCO1 cytochrome c oxidase assembly protein
7914270	3.13e-08	1.11e-09	7.72957	11.8587	2.05405	LAPTM5	lysosomal protein transmembrane 5
8149264	3.14e-08	1.11e-09	7.72781	11.853	1.26731	PPP1R3B	protein phosphatase 1 regulatory subunit 3B
8049682	3.2e-08	1.13e-09	7.72202	11.834	0.474394	MIR149	microRNA 149
8086698	3.33e-08	1.18e-09	-7.70962	11.7934	-0.506519	CCDC12	coiled-coil domain containing 12
7981964	3.35e-08	1.19e-09	-7.70693	11.7846	-0.93006	SNORD116-9///SNORD116-8///SNORD116-6///SNORD116-3	small nucleolar RNA, C/D box 116-9///small nucleolar RNA, C/D box 116-8///small nucleolar RNA, C/D box 116-6///small nucleolar RNA, C/D box 116-3
7993999	3.35e-08	1.19e-09	7.70682	11.7842	0.607113	LOC101060386///SMG1P3///SMG1P1///SMG1P5///SMG1P2///SMG1	putative uncharacterized SMG1-like protein///SMG1P3, nonsense mediated mRNA decay associated PI3K related kinase pseudogene 3///SMG1P1, nonsense mediated mRNA decay associated PI3K related kinase pseudogene 1///SMG1P5, nonsense mediated mRNA decay associated PI3K related kinase pseudogene 5///SMG1P2, nonsense mediated mRNA decay associated PI3K related kinase pseudogene 2///SMG1, nonsense mediate…
8000222	3.35e-08	1.19e-09	7.70682	11.7842	0.607113	LOC101060386///SMG1P3///SMG1P1///SMG1P5///SMG1P2///SMG1	putative uncharacterized SMG1-like protein///SMG1P3, nonsense mediated mRNA decay associated PI3K related kinase pseudogene 3///SMG1P1, nonsense mediated mRNA decay associated PI3K related kinase pseudogene 1///SMG1P5, nonsense mediated mRNA decay associated PI3K related kinase pseudogene 5///SMG1P2, nonsense mediated mRNA decay associated PI3K related kinase pseudogene 2///SMG1, nonsense mediate…
7981980	3.38e-08	1.2e-09	-7.70371	11.774	-1.09024	SNORD116-16	small nucleolar RNA, C/D box 116-16
7994026	3.39e-08	1.21e-09	7.70289	11.7713	0.541073	PKD1P6-NPIPP1///NPIPA8///NPIPA7///NPIPB9///NPIPA5///NPIPB5///NPIPB6///NPIPA2///NPIPA3///NPIPB4///PKD1P1///PDXDC2P///NPIPB3///NPIPA1///NPIPB5///NPIPB4///NPIPB3	PKD1P6-NPIPP1 readthrough///nuclear pore complex interacting protein family member A8///nuclear pore complex interacting protein family member A7///nuclear pore complex interacting protein family member B9///nuclear pore complex interacting protein family member A5///nuclear pore complex interacting protein family member B5///nuclear pore complex interacting protein family member B6///nuclear por…
8135277	3.43e-08	1.22e-09	7.69905	11.7588	0.668283	KMT2E	lysine methyltransferase 2E
8128472	3.43e-08	1.23e-09	7.6981	11.7556	0.935564	ASCC3	activating signal cointegrator 1 complex subunit 3
7914245	3.43e-08	1.23e-09	-7.69803	11.7554	-0.492559	MECR	mitochondrial trans-2-enoyl-CoA reductase
8101587	3.47e-08	1.24e-09	-7.6945	11.7438	-1.3433	MAPK10	mitogen-activated protein kinase 10
8163348	3.48e-08	1.25e-09	-7.69334	11.74	-0.871432	C9orf84	chromosome 9 open reading frame 84
7950644	3.49e-08	1.25e-09	-7.69217	11.7362	-0.506804	NDUFC2-KCTD14///NDUFC2	NDUFC2-KCTD14 readthrough///NADH:ubiquinone oxidoreductase subunit C2
8039034	3.52e-08	1.27e-09	7.68878	11.7251	0.766476	ZNF160	zinc finger protein 160
8017711	3.56e-08	1.28e-09	7.68473	11.7118	0.771558	GNA13///GNA13	G protein subunit alpha 13///G protein subunit alpha 13
7941702	3.56e-08	1.28e-09	7.68472	11.7118	0.56888	RBM14	RNA binding motif protein 14
7980970	3.58e-08	1.29e-09	-7.68323	11.7069	-0.592562	ITPK1	inositol-tetrakisphosphate 1-kinase
8155699	3.59e-08	1.29e-09	-7.68195	11.7027	-0.53371	FXN	frataxin
7944478	3.62e-08	1.31e-09	-7.679	11.693	-1.88102	PDZD3	PDZ domain containing 3
7958960	3.63e-08	1.31e-09	-7.67826	11.6906	-1.22718	TPCN1	two pore segment channel 1
7986463	3.63e-08	1.31e-09	7.67761	11.6885	1.43345	LRRK1	leucine rich repeat kinase 1
8105899	3.69e-08	1.34e-09	-7.67206	11.6703	-1.67016	MARVELD2	MARVEL domain containing 2
8177498	3.69e-08	1.34e-09	-7.67206	11.6703	-1.67016	MARVELD2	MARVEL domain containing 2
8178074	3.81e-08	1.38e-09	7.66151	11.6357	0.363888	C6orf25	chromosome 6 open reading frame 25
7899436	3.83e-08	1.39e-09	-7.65996	11.6306	-1.19875	SESN2	sestrin 2
7974533	3.83e-08	1.39e-09	-7.65954	11.6292	-1.01045	PELI2	pellino E3 ubiquitin protein ligase family member 2
8065868	3.83e-08	1.39e-09	-7.65944	11.6289	-0.742131	EIF6	eukaryotic translation initiation factor 6
7923378	3.83e-08	1.4e-09	-7.65854	11.626	-0.938756	CSRP1	cysteine and glycine rich protein 1
7981976	3.9e-08	1.42e-09	-7.6532	11.6084	-0.754299	SNORD116-14	small nucleolar RNA, C/D box 116-14
8087669	3.9e-08	1.42e-09	-7.65319	11.6084	-0.606987	NPRL2	NPR2-like, GATOR1 complex subunit
8040045	3.9e-08	1.42e-09	-7.65306	11.608	-0.757841	COLEC11	collectin subfamily member 11
8000603	3.9e-08	1.43e-09	-7.65207	11.6047	-0.776281	TUFM	Tu translation elongation factor, mitochondrial
7957850	3.91e-08	1.43e-09	7.65117	11.6018	2.13096	GAS2L3	growth arrest specific 2 like 3
7992987	3.93e-08	1.44e-09	-7.64942	11.596	-0.757239	HMOX2	heme oxygenase 2
8133074	3.95e-08	1.45e-09	7.64742	11.5895	0.598876	INTS4P2///INTS4P1///INTS4	integrator complex subunit 4 pseudogene 2///integrator complex subunit 4 pseudogene 1///integrator complex subunit 4
7983953	3.95e-08	1.45e-09	7.64705	11.5883	0.545166	RNF111	ring finger protein 111
7921868	3.96e-08	1.46e-09	7.64616	11.5853	1.868	FCGR3A	Fc fragment of IgG receptor IIIa
8055465	3.97e-08	1.46e-09	7.6449	11.5812	2.12997	CXCR4	C-X-C motif chemokine receptor 4
7969017	4e-08	1.48e-09	7.64232	11.5727	0.778615	RB1	RB transcriptional corepressor 1
8035249	4e-08	1.48e-09	-7.64197	11.5716	-0.709112	NR2F6	nuclear receptor subfamily 2 group F member 6
7941985	4.02e-08	1.49e-09	7.64004	11.5653	1.20768	TCIRG1	T-cell immune regulator 1, ATPase H+ transporting V0 subunit a3
8041225	4.04e-08	1.49e-09	-7.63837	11.5598	-1.57382	EHD3	EH domain containing 3
8052526	4.07e-08	1.51e-09	7.63571	11.5511	0.598543	XPO1	exportin 1
7988859	4.08e-08	1.51e-09	-7.63489	11.5484	-0.634233	GNB5	G protein subunit beta 5
7963046	4.12e-08	1.53e-09	7.63221	11.5396	0.679761	TUBA1B	tubulin alpha 1b
8163618	4.12e-08	1.53e-09	-7.63187	11.5385	-1.0473	TNFSF15	tumor necrosis factor superfamily member 15
8042310	4.14e-08	1.54e-09	7.62975	11.5315	1.1092	SLC1A4	solute carrier family 1 member 4
8104378	4.15e-08	1.54e-09	7.62903	11.5292	0.800229	PAPD7	poly(A) RNA polymerase D7, non-canonical
8098439	4.15e-08	1.54e-09	-7.62852	11.5275	-2.96122	EPCAM	epithelial cell adhesion molecule
8148728	4.15e-08	1.55e-09	-7.62825	11.5266	-0.984325	CYC1	cytochrome c1
8144557	4.18e-08	1.56e-09	-7.62555	11.5177	-1.83095	MSRA	methionine sulfoxide reductase A
8100251	4.18e-08	1.56e-09	7.62552	11.5176	0.770733	FRYL	FRY like transcription coactivator
7996393	4.19e-08	1.56e-09	7.62507	11.5161	0.897182	CBFB	core-binding factor beta subunit
8144281	4.21e-08	1.57e-09	7.62341	11.5107	0.887888	ARHGEF10	Rho guanine nucleotide exchange factor 10
8056151	4.22e-08	1.58e-09	-7.62192	11.5058	-2.05594	PLA2R1	phospholipase A2 receptor 1
8029006	4.24e-08	1.58e-09	7.62077	11.502	1.34503	AXL	AXL receptor tyrosine kinase
8092836	4.24e-08	1.58e-09	-7.62057	11.5014	-2.95105	CPN2	carboxypeptidase N subunit 2
8059580	4.26e-08	1.6e-09	-7.61849	11.4946	-1.86	DNER	delta/notch like EGF repeat containing
8001547	4.27e-08	1.6e-09	-7.61788	11.4926	-1.61905	PLLP	plasmolipin
8026294	4.31e-08	1.61e-09	-7.6149	11.4827	-0.403241	MISP3	MISP family member 3
8027876	4.31e-08	1.62e-09	-7.61423	11.4806	-0.600012	TMEM147	transmembrane protein 147
8038633	4.35e-08	1.64e-09	-7.61102	11.47	-1.90917	KLK1	kallikrein 1
8132376	4.4e-08	1.65e-09	7.60768	11.4591	0.700647	STARD3NL	STARD3 N-terminal like
7929032	4.42e-08	1.66e-09	7.60591	11.4532	0.937331	FAS	Fas cell surface death receptor
8063187	4.47e-08	1.68e-09	-7.60238	11.4417	-0.787665	EYA2	EYA transcriptional coactivator and phosphatase 2
8025414	4.49e-08	1.69e-09	-7.60052	11.4356	-0.596924	RAB11B	RAB11B, member RAS oncogene family
8011293	4.49e-08	1.69e-09	-7.6003	11.4348	-1.22816	CLUH	clustered mitochondria homolog
8092201	4.51e-08	1.7e-09	7.59888	11.4302	0.780232	TBL1XR1	transducin (beta)-like 1 X-linked receptor 1
7944493	4.56e-08	1.72e-09	7.59551	11.4191	0.821652	CBL	Cbl proto-oncogene
7905047	4.56e-08	1.72e-09	7.595	11.4174	2.60767	FCGR1CP///FCGR1B///FCGR1A	Fc fragment of IgG receptor Ic, pseudogene///Fc fragment of IgG receptor Ib///Fc fragment of IgG receptor Ia
7907466	4.69e-08	1.78e-09	-7.58623	11.3886	-0.762318	DARS2	aspartyl-tRNA synthetase 2, mitochondrial
8000799	4.78e-08	1.81e-09	-7.58005	11.3683	-1.46093	GDPD3	glycerophosphodiester phosphodiesterase domain containing 3
8078650	4.82e-08	1.83e-09	-7.57721	11.359	-0.995631	CTDSPL	CTD small phosphatase like
8048889	4.82e-08	1.83e-09	-7.57692	11.358	-0.614344	FBXO36	F-box protein 36
8019877	4.82e-08	1.83e-09	7.57651	11.3567	0.832702	SMCHD1	structural maintenance of chromosomes flexible hinge domain containing 1
8151637	4.85e-08	1.85e-09	-7.57448	11.35	-3.38717	SLC7A13	solute carrier family 7 member 13
8131719	4.86e-08	1.85e-09	7.57379	11.3477	3.69154	DNAH11	dynein axonemal heavy chain 11
8128133	4.86e-08	1.85e-09	-7.57358	11.3471	-0.658375	LYRM2	LYR motif containing 2
8008132	4.9e-08	1.87e-09	-7.57051	11.337	-0.816931	ATP5G1	ATP synthase, H+ transporting, mitochondrial Fo complex subunit C1 (subunit 9)
7944271	4.93e-08	1.89e-09	-7.56797	11.3286	-0.546735	TTC36	tetratricopeptide repeat domain 36
8143127	4.95e-08	1.9e-09	-7.56647	11.3237	-1.45125	FAM180A	family with sequence similarity 180 member A
8000205	5.04e-08	1.93e-09	7.56061	11.3045	0.510292	PKD1P6-NPIPP1///NPIPA8///NPIPA7///NPIPB9///NPIPA5///NPIPB5///NPIPB6///NPIPA2///NPIPA3///NPIPB4///PKD1P1///PDXDC2P///NPIPB3///NPIPA1///NPIPB5///NPIPB4///NPIPB3	PKD1P6-NPIPP1 readthrough///nuclear pore complex interacting protein family member A8///nuclear pore complex interacting protein family member A7///nuclear pore complex interacting protein family member B9///nuclear pore complex interacting protein family member A5///nuclear pore complex interacting protein family member B5///nuclear pore complex interacting protein family member B6///nuclear por…
7981982	5.05e-08	1.94e-09	-7.55977	11.3017	-0.524167	SNORD116-22///SNORD116-21///SNORD116-20///SNORD116-18///SNORD116-17///SNORD116-16///SNORD116-15///SNORD116-14///SNORD116-19///SNRPN	small nucleolar RNA, C/D box 116-22///small nucleolar RNA, C/D box 116-21///small nucleolar RNA, C/D box 116-20///small nucleolar RNA, C/D box 116-18///small nucleolar RNA, C/D box 116-17///small nucleolar RNA, C/D box 116-16///small nucleolar RNA, C/D box 116-15///small nucleolar RNA, C/D box 116-14///small nucleolar RNA, C/D box 116-19///small nuclear ribonucleoprotein polypeptide N
7981986	5.05e-08	1.94e-09	-7.55977	11.3017	-0.524167	SNORD116-22///SNORD116-21///SNORD116-20///SNORD116-18///SNORD116-17///SNORD116-16///SNORD116-15///SNORD116-14///SNORD116-19///SNRPN	small nucleolar RNA, C/D box 116-22///small nucleolar RNA, C/D box 116-21///small nucleolar RNA, C/D box 116-20///small nucleolar RNA, C/D box 116-18///small nucleolar RNA, C/D box 116-17///small nucleolar RNA, C/D box 116-16///small nucleolar RNA, C/D box 116-15///small nucleolar RNA, C/D box 116-14///small nucleolar RNA, C/D box 116-19///small nuclear ribonucleoprotein polypeptide N
8133095	5.08e-08	1.96e-09	7.55702	11.2926	0.532503	INTS4P2///INTS4P1///INTS4	integrator complex subunit 4 pseudogene 2///integrator complex subunit 4 pseudogene 1///integrator complex subunit 4
8082100	5.08e-08	1.96e-09	7.55701	11.2926	1.2184	PARP14	poly(ADP-ribose) polymerase family member 14
8079693	5.08e-08	1.96e-09	-7.55676	11.2918	-0.721493	WDR6	WD repeat domain 6
7975284	5.09e-08	1.96e-09	-7.55612	11.2897	-2.54132	RDH12	retinol dehydrogenase 12 (all-trans/9-cis/11-cis)
8056909	5.09e-08	1.96e-09	7.55601	11.2893	0.407447	ATF2	activating transcription factor 2
7947481	5.09e-08	1.96e-09	-7.55564	11.2881	-1.77457	ELF5	E74 like ETS transcription factor 5
7980189	5.09e-08	1.97e-09	-7.55534	11.2871	-0.686617	AREL1	apoptosis resistant E3 ubiquitin protein ligase 1
7912646	5.09e-08	1.97e-09	-7.55533	11.2871	-0.811998	CASP9	caspase 9
8037505	5.11e-08	1.98e-09	-7.55389	11.2824	-0.509091	TRAPPC6A	trafficking protein particle complex 6A
8023914	5.12e-08	1.98e-09	-7.5528	11.2788	-0.931042	PQLC1	PQ loop repeat containing 1
8019669	5.15e-08	1.99e-09	-7.55117	11.2734	-0.895005	GCGR	glucagon receptor
8097841	5.22e-08	2.02e-09	-7.54657	11.2583	-1.49327	TRIM2	tripartite motif containing 2
7903667	5.24e-08	2.03e-09	-7.54513	11.2536	-0.833733	SYPL2	synaptophysin like 2
8129099	5.3e-08	2.06e-09	-7.54117	11.2405	-0.914444	TSPYL1	TSPY like 1
8013179	5.39e-08	2.1e-09	-7.53608	11.2238	-0.783194	ATPAF2	ATP synthase mitochondrial F1 complex assembly factor 2
7932542	5.4e-08	2.1e-09	-7.53508	11.2205	-0.682579	C10orf67	chromosome 10 open reading frame 67
8117219	5.48e-08	2.13e-09	-7.53057	11.2057	-1.19207	ACOT13	acyl-CoA thioesterase 13
8085531	5.52e-08	2.16e-09	-7.52753	11.1957	-0.776438	MRPS25	mitochondrial ribosomal protein S25
8004241	5.59e-08	2.18e-09	-7.52359	11.1827	-0.412804	RNASEK-C17orf49///RNASEK///C17orf49	RNASEK-C17orf49 readthrough///ribonuclease K///chromosome 17 open reading frame 49
8112920	5.59e-08	2.19e-09	-7.52332	11.1819	-0.664671	ACOT12	acyl-CoA thioesterase 12
7939120	5.65e-08	2.21e-09	7.52	11.1709	1.1537	RCN1	reticulocalbin 1
8103043	5.68e-08	2.23e-09	7.51795	11.1642	0.571434	SLC10A7	solute carrier family 10 member 7
7922994	5.68e-08	2.23e-09	-7.51781	11.1637	-0.506546	BRINP3	BMP/retinoic acid inducible neural specific 3
7943413	5.72e-08	2.24e-09	7.51556	11.1563	2.05097	BIRC3	baculoviral IAP repeat containing 3
7964347	5.75e-08	2.26e-09	7.51393	11.151	0.83843	NEMP1	nuclear envelope integral membrane protein 1
7982878	5.78e-08	2.27e-09	-7.512	11.1446	-0.854913	CHP1	calcineurin like EF-hand protein 1
8080144	5.79e-08	2.27e-09	-7.51142	11.1427	-1.097	PARP3	poly(ADP-ribose) polymerase family member 3
8035825	5.81e-08	2.29e-09	-7.50984	11.1375	-1.6058	ZNF676	zinc finger protein 676
7943795	5.86e-08	2.31e-09	-7.50719	11.1288	-1.27244	HSPB2-C11orf52///C11orf52	HSPB2-C11orf52 readthrough (NMD candidate)///chromosome 11 open reading frame 52
8050557	5.86e-08	2.31e-09	-7.50682	11.1276	-1.27563	SDC1	syndecan 1
8040430	5.87e-08	2.32e-09	-7.5059	11.1245	-1.30565	VSNL1	visinin like 1
8086505	5.87e-08	2.32e-09	-7.50581	11.1242	-0.671617	ZDHHC3	zinc finger DHHC-type containing 3
7949033	5.9e-08	2.33e-09	-7.50435	11.1194	-0.622275	MACROD1	MACRO domain containing 1
8016789	5.93e-08	2.35e-09	7.50196	11.1116	0.560593	MBTD1	mbt domain containing 1
8087210	5.95e-08	2.35e-09	-7.50113	11.1089	-0.649405	PRKAR2A	protein kinase cAMP-dependent type II regulatory subunit alpha
8147228	5.99e-08	2.37e-09	-7.49847	11.1001	-0.924042	DECR1	2,4-dienoyl-CoA reductase 1, mitochondrial
7984380	6.09e-08	2.42e-09	-7.49326	11.083	-0.472237	IQCH	IQ motif containing H
8015712	6.09e-08	2.42e-09	-7.493	11.0821	-1.0102	COA3	cytochrome c oxidase assembly factor 3
8062557	6.18e-08	2.45e-09	-7.48837	11.0669	-1.76012	PPP1R16B	protein phosphatase 1 regulatory subunit 16B
8000131	6.23e-08	2.48e-09	7.48565	11.0579	0.514558	PKD1P6-NPIPP1///NPIPA8///NPIPA7///NPIPB9///NPIPA5///NPIPB5///NPIPB6///NPIPA2///NPIPA3///NPIPB4///PKD1P1///PDXDC2P///NPIPB3///NPIPA1///NPIPB5///NPIPB4///NPIPB3	PKD1P6-NPIPP1 readthrough///nuclear pore complex interacting protein family member A8///nuclear pore complex interacting protein family member A7///nuclear pore complex interacting protein family member B9///nuclear pore complex interacting protein family member A5///nuclear pore complex interacting protein family member B5///nuclear pore complex interacting protein family member B6///nuclear por…
8122265	6.34e-08	2.52e-09	7.47995	11.0391	1.45468	TNFAIP3	TNF alpha induced protein 3
8004510	6.39e-08	2.54e-09	7.4776	11.0314	1.21479	CD68	CD68 molecule
8173621	6.42e-08	2.56e-09	-7.47558	11.0248	-0.49551	KIAA2022	KIAA2022
8004237	6.43e-08	2.57e-09	-7.47472	11.0219	-0.630507	RNASEK-C17orf49///RNASEK	RNASEK-C17orf49 readthrough///ribonuclease K
7957106	6.43e-08	2.57e-09	7.47459	11.0215	0.413094	CNOT2	CCR4-NOT transcription complex subunit 2
8173430	6.43e-08	2.57e-09	-7.47448	11.0212	-0.521591	SNX12	sorting nexin 12
7928107	6.55e-08	2.62e-09	-7.46861	11.0018	-0.938301	H2AFY2	H2A histone family member Y2
8160546	6.57e-08	2.63e-09	-7.46736	10.9977	-0.680426	LINGO2	leucine rich repeat and Ig domain containing 2
8101701	6.58e-08	2.64e-09	-7.46668	10.9955	-0.923221	PPM1K///PPM1K	protein phosphatase, Mg2+/Mn2+ dependent 1K///protein phosphatase, Mg2+/Mn2+ dependent 1K
7957613	6.6e-08	2.65e-09	7.46583	10.9927	0.572207	VEZT	vezatin, adherens junctions transmembrane protein
8043100	6.61e-08	2.65e-09	7.46519	10.9906	0.99503	TMSB10	thymosin beta 10
8044927	6.62e-08	2.66e-09	7.46445	10.9881	1.25624	INHBB///INHBB	inhibin beta B subunit///inhibin beta B subunit
7909027	6.63e-08	2.67e-09	-7.46352	10.9851	-1.3868	NFASC	neurofascin
8173148	6.64e-08	2.67e-09	-7.46299	10.9833	-0.508965	FAM104B	family with sequence similarity 104 member B
7959322	6.73e-08	2.71e-09	-7.45871	10.9692	-0.562455	PSMD9	proteasome 26S subunit, non-ATPase 9
8082075	6.74e-08	2.71e-09	7.45824	10.9677	1.11377	DTX3L	deltex E3 ubiquitin ligase 3L
8143132	6.84e-08	2.76e-09	7.45339	10.9517	0.593709	LUZP6///MTPN	leucine zipper protein 6///myotrophin
7952953	6.9e-08	2.78e-09	-7.4504	10.9418	-0.831695	WNK1	WNK lysine deficient protein kinase 1
7991034	6.9e-08	2.79e-09	-7.45017	10.9411	-0.77258	HOMER2	homer scaffolding protein 2
8055496	6.92e-08	2.79e-09	-7.44939	10.9385	-0.605201	LRP1B	LDL receptor related protein 1B
7984245	7.03e-08	2.84e-09	-7.44422	10.9215	-1.72555	SLC51B	solute carrier family 51 beta subunit
8076586	7.03e-08	2.85e-09	-7.44383	10.9202	-0.776472	SCUBE1	signal peptide, CUB domain and EGF like domain containing 1
8095751	7.03e-08	2.85e-09	-7.4437	10.9198	-2.17339	PARM1	prostate androgen-regulated mucin-like protein 1
7973660	7.05e-08	2.86e-09	-7.4425	10.9158	-0.655529	GMPR2	guanosine monophosphate reductase 2
8000676	7.07e-08	2.87e-09	7.44124	10.9117	0.51442	PKD1P6-NPIPP1///NPIPA8///NPIPA7///NPIPB9///NPIPA5///NPIPB5///NPIPB6///NPIPA2///NPIPA3///NPIPB4///PKD1P1///PDXDC2P///NPIPB3///NPIPA1///NPIPB5///NPIPB4///NPIPB3	PKD1P6-NPIPP1 readthrough///nuclear pore complex interacting protein family member A8///nuclear pore complex interacting protein family member A7///nuclear pore complex interacting protein family member B9///nuclear pore complex interacting protein family member A5///nuclear pore complex interacting protein family member B5///nuclear pore complex interacting protein family member B6///nuclear por…
8118209	7.13e-08	2.9e-09	-7.43814	10.9015	-3.27912	APOM	apolipoprotein M
8178043	7.13e-08	2.9e-09	-7.43814	10.9015	-3.27912	APOM	apolipoprotein M
8179291	7.13e-08	2.9e-09	-7.43814	10.9015	-3.27912	APOM	apolipoprotein M
8005166	7.16e-08	2.92e-09	-7.43652	10.8961	-0.565538	UBB	ubiquitin B
7929816	7.21e-08	2.94e-09	7.43429	10.8888	2.67203	SCD	stearoyl-CoA desaturase
7981970	7.21e-08	2.94e-09	-7.43415	10.8883	-1.40901	SNORD116-11	small nucleolar RNA, C/D box 116-11
8119661	7.23e-08	2.95e-09	-7.43274	10.8837	-0.593104	RRP36	ribosomal RNA processing 36
7897460	7.29e-08	2.98e-09	-7.43024	10.8754	-1.14832	SLC25A33	solute carrier family 25 member 33
8083709	7.32e-08	2.99e-09	7.42856	10.8699	0.831384	SMC4	structural maintenance of chromosomes 4
8168723	7.33e-08	3e-09	7.42791	10.8678	0.462183	RPA4	replication protein A4
7969815	7.36e-08	3.01e-09	-7.42681	10.8641	-1.43004	CLYBL	citrate lyase beta like
8013159	7.39e-08	3.03e-09	-7.42517	10.8587	-1.03286	TOM1L2	target of myb1 like 2 membrane trafficking protein
8047372	7.4e-08	3.03e-09	-7.42458	10.8568	-0.6207	NDUFB3	NADH:ubiquinone oxidoreductase subunit B3
8056860	7.41e-08	3.04e-09	7.42376	10.8541	1.10134	WIPF1	WAS/WASL interacting protein family member 1
7950235	7.42e-08	3.05e-09	-7.4232	10.8522	-0.797249	STARD10	StAR related lipid transfer domain containing 10
8017621	7.43e-08	3.05e-09	7.42279	10.8509	0.53147	POLG2	DNA polymerase gamma 2, accessory subunit
8073449	7.44e-08	3.06e-09	-7.42208	10.8486	-1.3977	CSDC2	cold shock domain containing C2
7934326	7.45e-08	3.06e-09	-7.42164	10.8471	-0.481257	MRPS16	mitochondrial ribosomal protein S16
7945169	7.47e-08	3.08e-09	-7.42036	10.8429	-2.91381	TMEM45B	transmembrane protein 45B
8026991	7.5e-08	3.09e-09	-7.41905	10.8386	-1.25605	PGPEP1	pyroglutamyl-peptidase I
7931159	7.56e-08	3.12e-09	-7.41623	10.8293	-0.338707	PSTK///PSTK	phosphoseryl-tRNA kinase///phosphoseryl-tRNA kinase
8060418	7.69e-08	3.17e-09	7.41102	10.8121	1.07493	SIRPA	signal regulatory protein alpha
8065948	7.7e-08	3.18e-09	7.41053	10.8105	1.6352	FER1L4	fer-1 like family member 4, pseudogene
8022356	7.72e-08	3.19e-09	7.4095	10.8071	1.13615	SPIRE1	spire type actin nucleation factor 1
8077688	7.77e-08	3.21e-09	-7.40719	10.7995	-0.589173	IL17RC	interleukin 17 receptor C
7948088	7.77e-08	3.22e-09	-7.40688	10.7985	-1.21865	SLC25A33	solute carrier family 25 member 33
8014650	7.8e-08	3.23e-09	7.40572	10.7946	0.685907	LOC101929950///LOC440434///NPEPPS	puromycin-sensitive aminopeptidase-like protein///aminopeptidase puromycin sensitive pseudogene///aminopeptidase puromycin sensitive
7914003	7.82e-08	3.24e-09	-7.40471	10.7913	-0.581268	KDF1	keratinocyte differentiation factor 1
8017019	7.82e-08	3.25e-09	-7.40421	10.7897	-0.9032	MTMR4	myotubularin related protein 4
8146336	7.82e-08	3.25e-09	7.40411	10.7893	0.694513	SPIDR	scaffolding protein involved in DNA repair
7954777	7.83e-08	3.25e-09	7.40375	10.7882	0.581569	ALG10B///ALG10	ALG10B, alpha-1,2-glucosyltransferase///ALG10, alpha-1,2-glucosyltransferase
8058221	7.88e-08	3.28e-09	-7.40138	10.7803	-0.850794	TRAK2	trafficking kinesin protein 2
8161701	7.96e-08	3.31e-09	7.3981	10.7695	1.40005	TMEM2	transmembrane protein 2
8021442	8.02e-08	3.34e-09	7.39556	10.7611	1.02571	ZNF532	zinc finger protein 532
8013671	8.04e-08	3.35e-09	-7.39433	10.7571	-2.15779	SPAG5	sperm associated antigen 5
8170015	8.05e-08	3.36e-09	7.39379	10.7553	0.732277	ZNF449	zinc finger protein 449
7935810	8.08e-08	3.37e-09	-7.39249	10.751	-0.543215	NDUFB8	NADH:ubiquinone oxidoreductase subunit B8
8167749	8.18e-08	3.42e-09	7.38861	10.7383	0.760293	FAM156B///FAM156A	family with sequence similarity 156 member B///family with sequence similarity 156 member A
7977033	8.23e-08	3.45e-09	-7.38616	10.7301	-1.39748	AMN	amnion associated transmembrane protein
7915425	8.24e-08	3.45e-09	-7.38562	10.7284	-0.763393	ZMYND12	zinc finger MYND-type containing 12
7959298	8.24e-08	3.45e-09	-7.3856	10.7283	-0.720234	TMEM120B	transmembrane protein 120B
8058765	8.26e-08	3.46e-09	7.3846	10.725	2.18442	FN1	fibronectin 1
7997158	8.36e-08	3.51e-09	-7.38081	10.7125	-0.885631	MARVELD3	MARVEL domain containing 3
8143518	8.36e-08	3.52e-09	-7.37966	10.7087	-1.20952	TRPV5	transient receptor potential cation channel subfamily V member 5
8173059	8.36e-08	3.52e-09	-7.37961	10.7085	-0.911476	WNK3	WNK lysine deficient protein kinase 3
8066214	8.51e-08	3.59e-09	7.37411	10.6904	1.42942	TGM2	transglutaminase 2
8086689	8.53e-08	3.6e-09	-7.37302	10.6868	-1.23459	MYL3	myosin light chain 3
7927915	8.54e-08	3.61e-09	-7.3724	10.6848	-0.962765	STOX1	storkhead box 1
8126269	8.67e-08	3.66e-09	7.36768	10.6692	0.472651	TREML1	triggering receptor expressed on myeloid cells like 1
8021376	8.7e-08	3.68e-09	-7.36614	10.6641	-1.20577	NEDD4L	neural precursor cell expressed, developmentally down-regulated 4-like, E3 ubiquitin protein ligase
7981943	9.13e-08	3.87e-09	-7.35125	10.615	-1.1119	SNORD64///PWAR5	small nucleolar RNA, C/D box 64///Prader Willi/Angelman region RNA 5
8003892	9.28e-08	3.93e-09	-7.34632	10.5988	-0.995282	SMTNL2	smoothelin like 2
8164343	9.29e-08	3.94e-09	-7.34578	10.597	-1.27098	FAM102A	family with sequence similarity 102 member A
7991395	9.32e-08	3.96e-09	-7.34455	10.5929	-0.450997	GABARAPL3	GABA type A receptor associated protein like 3 pseudogene
8101874	9.33e-08	3.97e-09	-7.34385	10.5906	-1.15879	ADH1A	alcohol dehydrogenase 1A (class I), alpha polypeptide
8102249	9.41e-08	4e-09	-7.34109	10.5815	-0.741024	ETNPPL	ethanolamine-phosphate phospho-lyase
7908041	9.49e-08	4.04e-09	7.33828	10.5722	1.11855	LAMC1	laminin subunit gamma 1
8068238	9.52e-08	4.05e-09	7.33741	10.5693	1.28302	IFNAR2	interferon alpha and beta receptor subunit 2
8082422	9.54e-08	4.06e-09	-7.33651	10.5664	-0.813918	EEFSEC	eukaryotic elongation factor, selenocysteine-tRNA specific
7958565	9.58e-08	4.09e-09	-7.33483	10.5608	-0.790725	MVK	mevalonate kinase
8102848	9.58e-08	4.09e-09	7.33462	10.5602	0.996332	SETD7	SET domain containing lysine methyltransferase 7
7912659	9.58e-08	4.09e-09	-7.33458	10.56	-3.79344	AGMAT	agmatinase
8039687	9.63e-08	4.12e-09	-7.33264	10.5536	-0.69595	ZNF552	zinc finger protein 552
8104321	9.64e-08	4.13e-09	-7.33204	10.5516	-1.03051	ADAMTS16	ADAM metallopeptidase with thrombospondin type 1 motif 16
8167125	9.64e-08	4.13e-09	-7.33169	10.5505	-0.854507	USP11	ubiquitin specific peptidase 11
8013660	9.72e-08	4.17e-09	7.3286	10.5403	1.99916	ALDOC	aldolase, fructose-bisphosphate C
7991602	9.74e-08	4.18e-09	7.32779	10.5376	2.77558	PCSK6	proprotein convertase subtilisin/kexin type 6
8114491	9.74e-08	4.19e-09	-7.32764	10.5371	-2.87961	SLC23A1	solute carrier family 23 member 1
8029056	9.77e-08	4.2e-09	7.32633	10.5328	1.80457	TMEM91	transmembrane protein 91
8128867	9.77e-08	4.2e-09	7.32632	10.5327	0.763442	CDK19	cyclin dependent kinase 19
8087236	9.77e-08	4.21e-09	-7.3261	10.532	-0.759757	DALRD3	DALR anticodon binding domain containing 3
7910111	9.97e-08	4.3e-09	-7.31932	10.5096	-1.34103	EPHX1	epoxide hydrolase 1
7982000	9.99e-08	4.31e-09	-7.3186	10.5072	-1.84951	SNORD116-26	small nucleolar RNA, C/D box 116-26
8151042	1e-07	4.34e-09	-7.31664	10.5008	-0.705466	TTPA	alpha tocopherol transfer protein
8106141	1.01e-07	4.35e-09	7.31606	10.4989	0.69954	FCHO2	FCH domain only 2
8133122	1.01e-07	4.38e-09	-7.31374	10.4912	-0.873654	ASL	argininosuccinate lyase
7919800	1.02e-07	4.42e-09	7.31122	10.4829	1.81558	CTSS	cathepsin S
7995525	1.02e-07	4.42e-09	-7.31119	10.4828	-0.405106	NKD1	naked cuticle homolog 1
8008372	1.03e-07	4.45e-09	-7.30936	10.4768	-0.365708	EPN3	epsin 3
8014233	1.03e-07	4.47e-09	7.30763	10.4711	1.7202	SLFN11	schlafen family member 11
8033392	1.03e-07	4.48e-09	-7.30733	10.4701	-0.651013	XAB2	XPA binding protein 2
8147396	1.04e-07	4.53e-09	7.30405	10.4592	0.601373	INTS8	integrator complex subunit 8
8039796	1.05e-07	4.56e-09	-7.30207	10.4527	-0.52376	CHMP2A	charged multivesicular body protein 2A
8177732	1.06e-07	4.62e-09	7.29801	10.4393	0.663089	HLA-H///HLA-B///HLA-A///HLA-B///HLA-A	major histocompatibility complex, class I, H (pseudogene)///major histocompatibility complex, class I, B///major histocompatibility complex, class I, A///major histocompatibility complex, class I, B///major histocompatibility complex, class I, A
8079677	1.06e-07	4.63e-09	-7.29757	10.4378	-0.697196	P4HTM	prolyl 4-hydroxylase, transmembrane
8077931	1.06e-07	4.64e-09	-7.29699	10.4359	-0.611873	MKRN2	makorin ring finger protein 2
7981974	1.07e-07	4.67e-09	-7.29461	10.428	-1.04984	SNORD116-13	small nucleolar RNA, C/D box 116-13
8080781	1.07e-07	4.69e-09	-7.29339	10.424	-0.975298	PXK	PX domain containing serine/threonine kinase like
7974566	1.08e-07	4.71e-09	-7.29247	10.421	-0.678159	AP5M1	adaptor related protein complex 5 mu 1 subunit
7917304	1.08e-07	4.75e-09	-7.28985	10.4123	-1.85111	MCOLN3	mucolipin 3
7981955	1.09e-07	4.77e-09	-7.28822	10.4069	-1.087	SNORD116-4///SNRPN	small nucleolar RNA, C/D box 116-4///small nuclear ribonucleoprotein polypeptide N
8167790	1.09e-07	4.77e-09	-7.28809	10.4065	-0.783275	TSR2	TSR2, ribosome maturation factor
8090772	1.09e-07	4.78e-09	7.28797	10.4061	0.721674	TOPBP1	topoisomerase (DNA) II binding protein 1
8090866	1.09e-07	4.78e-09	-7.28782	10.4056	-0.779777	ANAPC13	anaphase promoting complex subunit 13
8164535	1.09e-07	4.78e-09	-7.28748	10.4045	-1.27713	CRAT	carnitine O-acetyltransferase
8075585	1.09e-07	4.79e-09	-7.28693	10.4027	-0.710528	RTCB	RNA 2',3'-cyclic phosphate and 5'-OH ligase
7951140	1.09e-07	4.8e-09	7.28657	10.4015	1.01659	LOC100131541	uncharacterized LOC100131541
7951397	1.1e-07	4.84e-09	7.28397	10.3929	1.41365	CASP1	caspase 1
7919351	1.11e-07	4.91e-09	7.2795	10.3782	0.560653	NBPF25P///NBPF19///NBPF20///NBPF10///NBPF8///NBPF9///NBPF15///NBPF11///NBPF12///NBPF3///NBPF1///NBPF14	neuroblastoma breakpoint family member 25, pseudogene///neuroblastoma breakpoint family member 19///neuroblastoma breakpoint family member 20///neuroblastoma breakpoint family member 10///neuroblastoma breakpoint family member 8///neuroblastoma breakpoint family member 9///neuroblastoma breakpoint family member 15///neuroblastoma breakpoint family member 11///neuroblastoma breakpoint family membe…
8137208	1.11e-07	4.92e-09	-7.27908	10.3767	-1.2763	ATP6V0E2	ATPase H+ transporting V0 subunit e2
8043937	1.12e-07	4.96e-09	7.27651	10.3683	0.69941	CNOT11	CCR4-NOT transcription complex subunit 11
7977270	1.13e-07	4.98e-09	7.27544	10.3647	1.53579	LOC388022	uncharacterized LOC388022
8180354	1.13e-07	4.99e-09	-7.27464	10.3621	-0.684004	ENSA	endosulfine alpha
8126153	1.13e-07	5.01e-09	-7.27356	10.3585	-2.02344	KCNK5	potassium two pore domain channel subfamily K member 5
8007471	1.15e-07	5.1e-09	-7.26811	10.3405	-0.693036	NBR1	NBR1, autophagy cargo receptor
8036232	1.16e-07	5.12e-09	-7.26709	10.3371	-0.440619	SYNE4	spectrin repeat containing nuclear envelope family member 4
8024687	1.16e-07	5.15e-09	-7.26508	10.3305	-0.698499	TJP3	tight junction protein 3
7897824	1.17e-07	5.21e-09	-7.26203	10.3204	-0.790097	MFN2	mitofusin 2
8123584	1.18e-07	5.25e-09	-7.25981	10.3131	-1.44226	MYLK4	myosin light chain kinase family member 4
8104268	1.19e-07	5.3e-09	-7.2565	10.3021	-4.76583	SLC6A19	solute carrier family 6 member 19
8133688	1.19e-07	5.32e-09	-7.25586	10.3	-1.30046	SNORA14A	small nucleolar RNA, H/ACA box 14A
7939620	1.2e-07	5.34e-09	-7.25429	10.2949	-1.26016	LARGE2	LARGE xylosyl- and glucuronyltransferase 2
8086555	1.21e-07	5.37e-09	-7.2527	10.2896	-0.577628	LZTFL1	leucine zipper transcription factor like 1
7959070	1.23e-07	5.47e-09	-7.2471	10.2711	-1.21375	PEBP1	phosphatidylethanolamine binding protein 1
8161362	1.23e-07	5.49e-09	-7.24621	10.2681	-0.706394	LOC102724238///LOC100126582///FGF7P3///LOC403323///FGF7P6///FGF7	uncharacterized LOC102724238///uncharacterized LOC100126582///fibroblast growth factor 7 pseudogene 3///uncharacterized LOC403323///fibroblast growth factor 7 pseudogene 6///fibroblast growth factor 7
8125373	1.23e-07	5.49e-09	7.24617	10.268	1.08944	GPSM3	G-protein signaling modulator 3
8179987	1.23e-07	5.49e-09	7.24617	10.268	1.08944	GPSM3	G-protein signaling modulator 3
8100145	1.24e-07	5.53e-09	-7.24411	10.2612	-0.74965	COMMD8	COMM domain containing 8
7917530	1.24e-07	5.56e-09	7.24213	10.2547	1.99216	GBP2	guanylate binding protein 2
7989849	1.25e-07	5.58e-09	7.24128	10.2518	0.681584	DENND4A	DENN domain containing 4A
8068280	1.25e-07	5.61e-09	7.23972	10.2467	0.710741	IFNGR2	interferon gamma receptor 2 (interferon gamma transducer 1)
7944656	1.26e-07	5.64e-09	-7.23788	10.2406	-0.763513	SC5D	sterol-C5-desaturase
7905060	1.27e-07	5.69e-09	7.23537	10.2323	2.29846	FCGR1CP///FCGR1B///FCGR1A	Fc fragment of IgG receptor Ic, pseudogene///Fc fragment of IgG receptor Ib///Fc fragment of IgG receptor Ia
7968484	1.27e-07	5.7e-09	7.23508	10.2314	1.03387	BRCA2	BRCA2, DNA repair associated
7904999	1.27e-07	5.71e-09	7.23445	10.2293	0.587081	NBPF25P///NBPF19///NBPF20///NBPF10///NBPF8///NBPF9///NBPF15///NBPF11///NBPF12///NBPF3///NBPF1///NBPF14	neuroblastoma breakpoint family member 25, pseudogene///neuroblastoma breakpoint family member 19///neuroblastoma breakpoint family member 20///neuroblastoma breakpoint family member 10///neuroblastoma breakpoint family member 8///neuroblastoma breakpoint family member 9///neuroblastoma breakpoint family member 15///neuroblastoma breakpoint family member 11///neuroblastoma breakpoint family membe…
7914202	1.28e-07	5.76e-09	7.23153	10.2196	1.61457	SNHG12///SNORA16A///SNORA61///SNORA44///SNHG12	small nucleolar RNA host gene 12///small nucleolar RNA, H/ACA box 16A///small nucleolar RNA, H/ACA box 61///small nucleolar RNA, H/ACA box 44///small nucleolar RNA host gene 12
8124380	1.29e-07	5.79e-09	-7.23016	10.2151	-0.704235	HIST1H1A	histone cluster 1, H1a
7952325	1.29e-07	5.82e-09	-7.2287	10.2103	-0.411643	HSPA8	heat shock protein family A (Hsp70) member 8
8000184	1.29e-07	5.83e-09	7.22809	10.2083	2.06621	IGSF6	immunoglobulin superfamily member 6
8167815	1.3e-07	5.85e-09	-7.22723	10.2054	-0.664421	MAGED2	MAGE family member D2
8079993	1.3e-07	5.85e-09	-7.22708	10.2049	-0.544242	CYB561D2	cytochrome b561 family member D2
8142345	1.3e-07	5.86e-09	7.22641	10.2027	1.17019	DOCK4	dedicator of cytokinesis 4
8151952	1.3e-07	5.88e-09	7.22567	10.2002	0.867262	NIPAL2	NIPA like domain containing 2
7944401	1.3e-07	5.9e-09	-7.2247	10.1971	-0.782147	HMBS	hydroxymethylbilane synthase
7990361	1.3e-07	5.91e-09	-7.22425	10.1956	-0.535518	UBL7	ubiquitin like 7
7943721	1.31e-07	5.92e-09	-7.22337	10.1926	-0.604753	FDX1	ferredoxin 1
8095566	1.32e-07	5.99e-09	-7.2201	10.1818	-0.888067	MOB1B	MOB kinase activator 1B
8013243	1.32e-07	6.01e-09	-7.21887	10.1778	-2.09933	SHMT1	serine hydroxymethyltransferase 1
8042337	1.34e-07	6.08e-09	7.21543	10.1664	0.522125	ACTR2	ARP2 actin related protein 2 homolog
8158523	1.34e-07	6.09e-09	-7.21506	10.1652	-0.674937	PTPA	protein phosphatase 2 phosphatase activator
7915238	1.34e-07	6.11e-09	-7.21411	10.162	-0.454983	NT5C1A	5'-nucleotidase, cytosolic IA
8019988	1.34e-07	6.11e-09	7.21389	10.1613	0.802943	PTPRM	protein tyrosine phosphatase, receptor type M
7960362	1.36e-07	6.2e-09	7.20944	10.1466	1.00043	LOC100128816	ACAH3104
7904976	1.37e-07	6.24e-09	7.20751	10.1402	0.591293	NBPF25P///NBPF19///NBPF20///NBPF10///NBPF8///NBPF9///NBPF15///NBPF11///NBPF12///NBPF3///NBPF1///NBPF14	neuroblastoma breakpoint family member 25, pseudogene///neuroblastoma breakpoint family member 19///neuroblastoma breakpoint family member 20///neuroblastoma breakpoint family member 10///neuroblastoma breakpoint family member 8///neuroblastoma breakpoint family member 9///neuroblastoma breakpoint family member 15///neuroblastoma breakpoint family member 11///neuroblastoma breakpoint family membe…
7984932	1.39e-07	6.34e-09	-7.20315	10.1258	-0.890301	SCAMP5	secretory carrier membrane protein 5
8160441	1.4e-07	6.38e-09	7.20119	10.1193	0.758996	CDKN2A	cyclin dependent kinase inhibitor 2A
7999596	1.4e-07	6.41e-09	-7.19975	10.1145	-0.605909	LOC102724984///LOC728138///KIAA2013	uncharacterized protein KIAA2013///KIAA2013 pseudogene///KIAA2013
7971311	1.41e-07	6.45e-09	-7.19798	10.1087	-0.626798	ENOX1	ecto-NOX disulfide-thiol exchanger 1
7961654	1.41e-07	6.46e-09	7.19745	10.1069	0.836777	RECQL	RecQ like helicase
8081612	1.41e-07	6.47e-09	-7.19687	10.105	-1.11173	ABHD10	abhydrolase domain containing 10
8032484	1.42e-07	6.51e-09	-7.1952	10.0995	-0.559261	TIMM13	translocase of inner mitochondrial membrane 13
7915733	1.42e-07	6.51e-09	-7.19502	10.0989	-0.588507	PRDX1	peroxiredoxin 1
7981953	1.42e-07	6.51e-09	-7.19496	10.0987	-0.838099	SNORD116-9///SNORD116-8///SNORD116-7///SNORD116-5///SNORD116-3	small nucleolar RNA, C/D box 116-9///small nucleolar RNA, C/D box 116-8///small nucleolar RNA, C/D box 116-7///small nucleolar RNA, C/D box 116-5///small nucleolar RNA, C/D box 116-3
7981966	1.42e-07	6.51e-09	-7.19496	10.0987	-0.838099	SNORD116-9///SNORD116-8///SNORD116-7///SNORD116-5///SNORD116-3	small nucleolar RNA, C/D box 116-9///small nucleolar RNA, C/D box 116-8///small nucleolar RNA, C/D box 116-7///small nucleolar RNA, C/D box 116-5///small nucleolar RNA, C/D box 116-3
8135378	1.43e-07	6.56e-09	-7.19251	10.0906	-1.15317	PRKAR2B	protein kinase cAMP-dependent type II regulatory subunit beta
7969776	1.44e-07	6.61e-09	7.19043	10.0837	0.464435	UBAC2	UBA domain containing 2
7922104	1.45e-07	6.67e-09	-7.18755	10.0742	-1.02401	GCSHP3///LOC729080///LOC641746///GCSH	glycine cleavage system protein H pseudogene 3///glycine cleavage system protein H (aminomethyl carrier) pseudogene///glycine cleavage system protein H (aminomethyl carrier) pseudogene///glycine cleavage system protein H
8110821	1.46e-07	6.75e-09	7.18406	10.0627	3.48806	SLC6A3	solute carrier family 6 member 3
8080013	1.46e-07	6.76e-09	-7.18374	10.0616	-0.658352	MAPKAPK3	mitogen-activated protein kinase-activated protein kinase 3
7999920	1.46e-07	6.76e-09	-7.18367	10.0614	-1.76944	GP2	glycoprotein 2
7930194	1.47e-07	6.78e-09	-7.18284	10.0586	-1.09981	CNNM2	cyclin and CBS domain divalent metal cation transport mediator 2
8159838	1.47e-07	6.78e-09	-7.18277	10.0584	-2.02097	C9orf66	chromosome 9 open reading frame 66
8148715	1.47e-07	6.83e-09	-7.18074	10.0517	-0.929783	GPAA1	glycosylphosphatidylinositol anchor attachment 1
7996819	1.48e-07	6.86e-09	-7.17946	10.0474	-1.93269	CDH3	cadherin 3
8001394	1.48e-07	6.86e-09	-7.17937	10.0471	-1.91185	TOX3	TOX high mobility group box family member 3
7994371	1.48e-07	6.86e-09	7.17915	10.0464	0.659688	NPIPB9///NPIPB5///NPIPB6///PDXDC2P///NPIPB3	nuclear pore complex interacting protein family member B9///nuclear pore complex interacting protein family member B5///nuclear pore complex interacting protein family member B6///pyridoxal dependent decarboxylase domain containing 2, pseudogene///nuclear pore complex interacting protein family member B3
8069711	1.48e-07	6.86e-09	7.17914	10.0464	0.535924	LTN1	listerin E3 ubiquitin protein ligase 1
7907439	1.51e-07	7.03e-09	-7.17218	10.0233	-0.708578	PRDX6	peroxiredoxin 6
7919271	1.53e-07	7.1e-09	7.16883	10.0123	0.551301	NBPF25P///NBPF19///NBPF20///NBPF10///NBPF8///NBPF9///NBPF15///NBPF11///NBPF12///NBPF3///NBPF1///NBPF14	neuroblastoma breakpoint family member 25, pseudogene///neuroblastoma breakpoint family member 19///neuroblastoma breakpoint family member 20///neuroblastoma breakpoint family member 10///neuroblastoma breakpoint family member 8///neuroblastoma breakpoint family member 9///neuroblastoma breakpoint family member 15///neuroblastoma breakpoint family member 11///neuroblastoma breakpoint family membe…
8025035	1.53e-07	7.13e-09	-7.16783	10.009	-0.646455	ALKBH7	alkB homolog 7
8146225	1.53e-07	7.13e-09	-7.16763	10.0083	-0.61443	SMIM19	small integral membrane protein 19
7945573	1.53e-07	7.14e-09	-7.16747	10.0078	-0.615422	POLR2L	RNA polymerase II subunit L
8011093	1.53e-07	7.15e-09	-7.16685	10.0057	-1.09123	SLC43A2	solute carrier family 43 member 2
8025500	1.53e-07	7.17e-09	-7.16599	10.0029	-0.518454	UBL5	ubiquitin like 5
8125500	1.54e-07	7.19e-09	7.16519	10.0002	1.12841	PSMB8	proteasome subunit beta 8
8178855	1.54e-07	7.19e-09	7.16519	10.0002	1.12841	PSMB8	proteasome subunit beta 8
8180049	1.54e-07	7.19e-09	7.16519	10.0002	1.12841	PSMB8	proteasome subunit beta 8
7919412	1.55e-07	7.25e-09	7.16289	9.99261	0.570817	NBPF25P///NBPF19///NBPF20///NBPF10///NBPF8///NBPF9///NBPF15///NBPF11///NBPF12///NBPF3///NBPF1///NBPF14	neuroblastoma breakpoint family member 25, pseudogene///neuroblastoma breakpoint family member 19///neuroblastoma breakpoint family member 20///neuroblastoma breakpoint family member 10///neuroblastoma breakpoint family member 8///neuroblastoma breakpoint family member 9///neuroblastoma breakpoint family member 15///neuroblastoma breakpoint family member 11///neuroblastoma breakpoint family membe…
7925611	1.56e-07	7.34e-09	-7.15907	9.97996	-0.708427	TFB2M	transcription factor B2, mitochondrial
7981958	1.57e-07	7.36e-09	-7.15834	9.97756	-1.00865	SNORD116-9///SNORD116-7///SNORD116-5///SNORD116-3	small nucleolar RNA, C/D box 116-9///small nucleolar RNA, C/D box 116-7///small nucleolar RNA, C/D box 116-5///small nucleolar RNA, C/D box 116-3
7981962	1.57e-07	7.36e-09	-7.15834	9.97756	-1.00865	SNORD116-9///SNORD116-7///SNORD116-5///SNORD116-3	small nucleolar RNA, C/D box 116-9///small nucleolar RNA, C/D box 116-7///small nucleolar RNA, C/D box 116-5///small nucleolar RNA, C/D box 116-3
8002999	1.57e-07	7.36e-09	-7.15833	9.97752	-1.00129	GCSHP3///LOC729080///LOC641746///GCSH	glycine cleavage system protein H pseudogene 3///glycine cleavage system protein H (aminomethyl carrier) pseudogene///glycine cleavage system protein H (aminomethyl carrier) pseudogene///glycine cleavage system protein H
8033241	1.57e-07	7.37e-09	7.15799	9.97641	1.54397	CD70	CD70 molecule
7919133	1.58e-07	7.44e-09	7.15495	9.96635	2.32281	FCGR1CP///FCGR1B///FCGR1A	Fc fragment of IgG receptor Ic, pseudogene///Fc fragment of IgG receptor Ib///Fc fragment of IgG receptor Ia
7950005	1.62e-07	7.63e-09	-7.14759	9.94198	-0.529061	MRGPRF	MAS related GPR family member F
7918323	1.62e-07	7.63e-09	-7.14732	9.94107	-1.08731	SORT1	sortilin 1
8137133	1.62e-07	7.64e-09	7.14704	9.94017	0.847172	KRBA1	KRAB-A domain containing 1
8034299	1.62e-07	7.65e-09	-7.14669	9.93902	-0.600163	ELOF1	elongation factor 1 homolog
8090690	1.62e-07	7.67e-09	-7.14606	9.93691	-0.827331	CPNE4	copine 4
7917532	1.63e-07	7.68e-09	7.1455	9.93506	1.79824	GBP2	guanylate binding protein 2
8068952	1.63e-07	7.68e-09	-7.14533	9.93449	-0.960345	AGPAT3	1-acylglycerol-3-phosphate O-acyltransferase 3
7909862	1.66e-07	7.86e-09	-7.1384	9.91157	-0.953378	C1orf115	chromosome 1 open reading frame 115
8019507	1.66e-07	7.87e-09	7.13798	9.91019	0.476343	C17orf62	chromosome 17 open reading frame 62
7940989	1.67e-07	7.9e-09	-7.13703	9.90702	-0.611347	ESRRA	estrogen related receptor alpha
7911559	1.67e-07	7.93e-09	-7.13587	9.90317	-0.754246	MRPL20	mitochondrial ribosomal protein L20
8039939	1.67e-07	7.93e-09	-7.13587	9.90317	-0.754246	MRPL20	mitochondrial ribosomal protein L20
7928308	1.67e-07	7.95e-09	7.1353	9.90131	1.81945	DDIT4	DNA damage inducible transcript 4
8096511	1.68e-07	7.98e-09	-7.13411	9.89736	-1.59358	BMPR1B	bone morphogenetic protein receptor type 1B
8098342	1.68e-07	7.99e-09	7.13348	9.89526	0.945494	SAP30	Sin3A associated protein 30
8011212	1.68e-07	8e-09	-7.13305	9.89386	-0.85326	SDHC	succinate dehydrogenase complex subunit C
7981949	1.68e-07	8.01e-09	-7.13276	9.89288	-1.00467	SNORD116-1	small nucleolar RNA, C/D box 116-1
7975095	1.68e-07	8.02e-09	-7.13248	9.89197	-0.796703	PLEKHG3	pleckstrin homology and RhoGEF domain containing G3
8133876	1.69e-07	8.07e-09	7.13062	9.88579	3.02895	CD36	CD36 molecule
8116610	1.72e-07	8.19e-09	-7.12624	9.87132	-1.5795	NQO2	NAD(P)H quinone dehydrogenase 2
7995825	1.76e-07	8.4e-09	-7.11847	9.84558	-2.02551	MT1F	metallothionein 1F
8145136	1.76e-07	8.42e-09	7.1178	9.84337	0.657143	PPP3CC	protein phosphatase 3 catalytic subunit gamma
8041902	1.77e-07	8.46e-09	7.11652	9.83912	0.687812	FOXN2	forkhead box N2
8081288	1.78e-07	8.56e-09	7.11308	9.82775	2.79352	TMEM45A	transmembrane protein 45A
7979984	1.81e-07	8.69e-09	-7.10833	9.812	-0.660019	ZFYVE1	zinc finger FYVE-type containing 1
8008870	1.81e-07	8.69e-09	7.1083	9.81191	0.483967	VMP1	vacuole membrane protein 1
7965410	1.82e-07	8.75e-09	-7.10635	9.80544	-3.56221	DCN	decorin
7956658	1.82e-07	8.76e-09	-7.10591	9.80401	-1.78221	SLC16A7	solute carrier family 16 member 7
7981947	1.82e-07	8.78e-09	-7.10551	9.80268	-1.59886	SNORD109B///SNORD109A	small nucleolar RNA, C/D box 109B///small nucleolar RNA, C/D box 109A
7982098	1.82e-07	8.78e-09	-7.10551	9.80268	-1.59886	SNORD109B///SNORD109A	small nucleolar RNA, C/D box 109B///small nucleolar RNA, C/D box 109A
7904574	1.86e-07	8.97e-09	7.09906	9.7813	0.597661	NBPF25P///NBPF19///NBPF20///NBPF10///NBPF8///NBPF9///NBPF15///NBPF11///NBPF12///NBPF3///NBPF1///NBPF14	neuroblastoma breakpoint family member 25, pseudogene///neuroblastoma breakpoint family member 19///neuroblastoma breakpoint family member 20///neuroblastoma breakpoint family member 10///neuroblastoma breakpoint family member 8///neuroblastoma breakpoint family member 9///neuroblastoma breakpoint family member 15///neuroblastoma breakpoint family member 11///neuroblastoma breakpoint family membe…
8030133	1.9e-07	9.18e-09	-7.09209	9.75823	-0.719987	NUCB1	nucleobindin 1
8068583	1.92e-07	9.26e-09	-7.08945	9.74949	-2.73078	KCNJ15	potassium voltage-gated channel subfamily J member 15
8175039	1.92e-07	9.28e-09	7.08876	9.74721	1.12306	ELF4	E74 like ETS transcription factor 4
8016628	1.92e-07	9.29e-09	7.08847	9.74624	0.542785	PPP1R9B	protein phosphatase 1 regulatory subunit 9B
7955441	1.92e-07	9.29e-09	-7.08839	9.74599	-1.84115	METTL7A	methyltransferase like 7A
7908879	1.94e-07	9.4e-09	7.08483	9.73418	1.1616	PPFIA4	PTPRF interacting protein alpha 4
8035941	1.94e-07	9.42e-09	-7.08421	9.73213	-2.60518	SLC7A9	solute carrier family 7 member 9
7908861	1.94e-07	9.43e-09	7.08392	9.73115	0.960331	OCR1	ovarian cancer-related protein 1
8008263	1.95e-07	9.46e-09	-7.08299	9.7281	-1.61337	PDK2	pyruvate dehydrogenase kinase 2
8000651	1.97e-07	9.56e-09	7.07999	9.71816	0.471652	BOLA2-SMG1P6///LOC101060386///SMG1P3///BOLA2B///SMG1P1///SMG1P5///BOLA2///SMG1P2///SMG1	BOLA2-SMG1P6 readthrough///putative uncharacterized SMG1-like protein///SMG1P3, nonsense mediated mRNA decay associated PI3K related kinase pseudogene 3///bolA family member 2B///SMG1P1, nonsense mediated mRNA decay associated PI3K related kinase pseudogene 1///SMG1P5, nonsense mediated mRNA decay associated PI3K related kinase pseudogene 5///bolA family member 2///SMG1P2, nonsense mediated mRNA …
8138489	1.97e-07	9.56e-09	7.0799	9.71786	1.71022	CDCA7L	cell division cycle associated 7 like
7975876	1.98e-07	9.62e-09	-7.07794	9.71134	-0.958843	ESRRB	estrogen related receptor beta
7937823	1.99e-07	9.68e-09	-7.07625	9.70576	-0.733355	KCNQ1	potassium voltage-gated channel subfamily Q member 1
8111524	2e-07	9.73e-09	-7.07457	9.70019	-1.47147	UGT3A2	UDP glycosyltransferase family 3 member A2
7982938	2e-07	9.74e-09	-7.07421	9.69901	-1.4922	TYRO3	TYRO3 protein tyrosine kinase
8038792	2.02e-07	9.87e-09	-7.07033	9.68613	-1.01803	ETFB	electron transfer flavoprotein beta subunit
8049737	2.05e-07	1e-08	-7.06618	9.67238	-1.10314	AGXT	alanine-glyoxylate aminotransferase
8138776	2.06e-07	1.01e-08	-7.06443	9.66659	-0.930258	HIBADH	3-hydroxyisobutyrate dehydrogenase
8016159	2.07e-07	1.02e-08	-7.06169	9.65752	-0.698269	DCAKD	dephospho-CoA kinase domain containing
7897288	2.1e-07	1.03e-08	-7.05799	9.64525	-0.596416	ESPN	espin
8022295	2.1e-07	1.03e-08	7.05784	9.64475	1.86692	PIEZO2	piezo type mechanosensitive ion channel component 2
8152053	2.1e-07	1.03e-08	-7.05746	9.64351	-0.75116	ANKRD46	ankyrin repeat domain 46
8052669	2.11e-07	1.04e-08	7.05558	9.63729	0.949174	SERTAD2	SERTA domain containing 2
8097417	2.14e-07	1.05e-08	-7.05093	9.62186	-0.734167	JADE1	jade family PHD finger 1
8117987	2.15e-07	1.06e-08	-7.0494	9.61679	-0.683041	C6orf136	chromosome 6 open reading frame 136
8046695	2.17e-07	1.07e-08	7.0469	9.60852	1.66245	ITGA4	integrin subunit alpha 4
8117458	2.18e-07	1.07e-08	7.04551	9.6039	1.43859	BTN3A1	butyrophilin subfamily 3 member A1
7903777	2.18e-07	1.08e-08	-7.0445	9.60058	-1.17009	GSTM5	glutathione S-transferase mu 5
7959220	2.2e-07	1.08e-08	-7.0422	9.59293	-1.32292	ACADS	acyl-CoA dehydrogenase, C-2 to C-3 short chain
7998510	2.2e-07	1.08e-08	-7.04219	9.59291	-0.877199	CLCN7	chloride voltage-gated channel 7
7919438	2.2e-07	1.09e-08	7.04106	9.58915	0.576777	NBPF25P///NBPF19///NBPF20///NBPF10///NBPF8///NBPF9///NBPF15///NBPF11///NBPF12///NBPF3///NBPF1///NBPF14	neuroblastoma breakpoint family member 25, pseudogene///neuroblastoma breakpoint family member 19///neuroblastoma breakpoint family member 20///neuroblastoma breakpoint family member 10///neuroblastoma breakpoint family member 8///neuroblastoma breakpoint family member 9///neuroblastoma breakpoint family member 15///neuroblastoma breakpoint family member 11///neuroblastoma breakpoint family membe…
7914940	2.22e-07	1.1e-08	-7.03911	9.5827	-0.658684	MRPS15	mitochondrial ribosomal protein S15
7995362	2.23e-07	1.1e-08	-7.03672	9.57478	-1.61428	GPT2	glutamic--pyruvic transaminase 2
7999304	2.27e-07	1.12e-08	-7.03159	9.55778	-0.414753	EEF2KMT	eukaryotic elongation factor 2 lysine methyltransferase
7898799	2.27e-07	1.13e-08	7.03083	9.55525	1.99978	C1QC	complement C1q C chain
7915245	2.28e-07	1.13e-08	-7.02965	9.55133	-0.462213	HPCAL4	hippocalcin like 4
8138116	2.28e-07	1.13e-08	7.0291	9.54953	0.592768	ZNF12	zinc finger protein 12
7984743	2.29e-07	1.14e-08	7.02797	9.54578	1.01105	CD276	CD276 molecule
7993821	2.29e-07	1.14e-08	7.02772	9.54496	0.801033	CRYM-AS1	CRYM antisense RNA 1
8002778	2.29e-07	1.14e-08	7.0276	9.54455	1.28702	MLKL	mixed lineage kinase domain like
8167069	2.31e-07	1.15e-08	-7.02563	9.53803	-0.533542	UBA1	ubiquitin like modifier activating enzyme 1
8106303	2.31e-07	1.15e-08	7.02522	9.53665	0.471019	POLK	DNA polymerase kappa
8083183	2.31e-07	1.15e-08	7.02453	9.53439	0.480166	U2SURP	U2 snRNP associated SURP domain containing
7934178	2.33e-07	1.16e-08	-7.02188	9.52558	-1.29412	PCBD1	pterin-4 alpha-carbinolamine dehydratase 1
7906720	2.33e-07	1.16e-08	7.02127	9.52358	1.9625	FCER1G	Fc fragment of IgE receptor Ig
8000156	2.36e-07	1.18e-08	7.01772	9.5118	0.544856	SMG1P3///SMG1P1///SMG1P5///SMG1	SMG1P3, nonsense mediated mRNA decay associated PI3K related kinase pseudogene 3///SMG1P1, nonsense mediated mRNA decay associated PI3K related kinase pseudogene 1///SMG1P5, nonsense mediated mRNA decay associated PI3K related kinase pseudogene 5///SMG1, nonsense mediated mRNA decay associated PI3K related kinase
7999841	2.36e-07	1.18e-08	7.01742	9.51081	0.432287	SMG1	SMG1, nonsense mediated mRNA decay associated PI3K related kinase
7899096	2.37e-07	1.19e-08	-7.01557	9.50468	-0.69382	ZNF593	zinc finger protein 593
8147307	2.37e-07	1.19e-08	-7.01533	9.50388	-0.554457	FAM92A1	family with sequence similarity 92 member A1
7918437	2.38e-07	1.19e-08	-7.01425	9.5003	-1.1515	LAMTOR5	late endosomal/lysosomal adaptor, MAPK and MTOR activator 5
8117777	2.41e-07	1.21e-08	7.0102	9.48687	0.645596	HLA-H///HLA-G///HLA-A///HLA-A	major histocompatibility complex, class I, H (pseudogene)///major histocompatibility complex, class I, G///major histocompatibility complex, class I, A///major histocompatibility complex, class I, A
8109344	2.41e-07	1.21e-08	7.00995	9.48605	1.16405	GM2A	GM2 ganglioside activator
8010562	2.42e-07	1.21e-08	-7.00848	9.48118	-1.06217	BAIAP2	BAI1 associated protein 2
7939131	2.42e-07	1.22e-08	-7.00802	9.47963	-0.619244	WT1-AS	WT1 antisense RNA
8072274	2.42e-07	1.22e-08	-7.00777	9.47882	-0.586656	UQCR10	ubiquinol-cytochrome c reductase, complex III subunit X
8079294	2.42e-07	1.22e-08	-7.00775	9.47876	-0.465635	EXOSC7	exosome component 7
7928471	2.45e-07	1.23e-08	-7.00396	9.46618	-0.699644	ADK	adenosine kinase
8058127	2.46e-07	1.24e-08	7.00257	9.46156	0.664544	CLK1	CDC like kinase 1
8116484	2.46e-07	1.24e-08	7.00233	9.46079	0.875782	MGAT1	mannosyl (alpha-1,3-)-glycoprotein beta-1,2-N-acetylglucosaminyltransferase
8177851	2.46e-07	1.24e-08	-7.00229	9.46064	-0.711646	C6orf136	chromosome 6 open reading frame 136
8179167	2.46e-07	1.24e-08	-7.00229	9.46064	-0.711646	C6orf136	chromosome 6 open reading frame 136
8015827	2.46e-07	1.24e-08	-7.00203	9.4598	-0.834914	SOST	sclerostin
8117447	2.46e-07	1.24e-08	7.00187	9.45925	0.831551	BTN2A2	butyrophilin subfamily 2 member A2
7972190	2.47e-07	1.24e-08	7.00113	9.4568	0.557384	RBM26	RNA binding motif protein 26
7975889	2.48e-07	1.25e-08	6.99896	9.44961	1.33327	VASH1	vasohibin 1
8066461	2.48e-07	1.25e-08	-6.99845	9.44791	-0.661806	TOMM34	translocase of outer mitochondrial membrane 34
8089040	2.5e-07	1.26e-08	-6.99609	9.44008	-0.77414	MINA	MYC induced nuclear antigen
7945620	2.5e-07	1.27e-08	-6.99605	9.43995	-0.921864	TOLLIP	toll interacting protein
7906400	2.51e-07	1.27e-08	6.99471	9.43553	1.42156	IFI16	interferon gamma inducible protein 16
8098576	2.51e-07	1.27e-08	-6.9944	9.4345	-1.33559	SLC25A4	solute carrier family 25 member 4
7899023	2.51e-07	1.27e-08	-6.9942	9.43383	-0.593862	LDLRAP1	low density lipoprotein receptor adaptor protein 1
8124897	2.52e-07	1.28e-08	6.99204	9.42665	1.96547	PSORS1C3	psoriasis susceptibility 1 candidate 3 (non-protein coding)
8179727	2.52e-07	1.28e-08	6.99204	9.42665	1.96547	PSORS1C3	psoriasis susceptibility 1 candidate 3 (non-protein coding)
8066031	2.53e-07	1.29e-08	-6.99062	9.42196	-0.306086	SCAND1	SCAN domain containing 1
8120783	2.53e-07	1.29e-08	-6.9905	9.42155	-0.975038	MYO6	myosin VI
8103094	2.54e-07	1.29e-08	-6.98984	9.41935	-1.35402	NR3C2	nuclear receptor subfamily 3 group C member 2
7915567	2.54e-07	1.29e-08	-6.98977	9.41913	-0.638741	ERI3	ERI1 exoribonuclease family member 3
7898483	2.54e-07	1.29e-08	-6.98908	9.41685	-0.754247	ARHGEF10L	Rho guanine nucleotide exchange factor 10 like
8101366	2.58e-07	1.31e-08	-6.98453	9.40175	-1.74885	SCD5	stearoyl-CoA desaturase 5
8073430	2.6e-07	1.33e-08	-6.98136	9.39124	-1.33701	ACO2	aconitase 2
8124901	2.61e-07	1.33e-08	6.9804	9.38805	0.627723	HLA-C///HLA-B///HLA-A///HLA-B///HLA-A	major histocompatibility complex, class I, C///major histocompatibility complex, class I, B///major histocompatibility complex, class I, A///major histocompatibility complex, class I, B///major histocompatibility complex, class I, A
8028872	2.62e-07	1.34e-08	-6.9795	9.38507	-1.03286	LTBP4	latent transforming growth factor beta binding protein 4
8067839	2.62e-07	1.34e-08	-6.97917	9.38399	-1.0139	FGF7P3///FGF7P6///FGF7	fibroblast growth factor 7 pseudogene 3///fibroblast growth factor 7 pseudogene 6///fibroblast growth factor 7
7972890	2.62e-07	1.34e-08	-6.97798	9.38004	-1.04669	GRTP1	growth hormone regulated TBC protein 1
8099721	2.62e-07	1.34e-08	6.97794	9.37989	1.50557	SEL1L3	SEL1L family member 3
8081620	2.63e-07	1.35e-08	-6.97713	9.37723	-0.635372	TAGLN3	transgelin 3
7958202	2.63e-07	1.35e-08	6.97644	9.37492	1.32929	CHST11	carbohydrate (chondroitin 4) sulfotransferase 11
8170921	2.64e-07	1.35e-08	6.97612	9.37387	1.06791	PLXNA3	plexin A3
7975167	2.64e-07	1.35e-08	-6.97602	9.37354	-1.37451	GPHN	gephyrin
7984952	2.65e-07	1.36e-08	6.97388	9.36642	0.625649	C15orf39	chromosome 15 open reading frame 39
8144315	2.65e-07	1.36e-08	6.9735	9.36517	0.790016	ARHGEF10	Rho guanine nucleotide exchange factor 10
8117861	2.66e-07	1.37e-08	6.97239	9.36149	0.529161	HLA-L	major histocompatibility complex, class I, L (pseudogene)
8179080	2.66e-07	1.37e-08	6.97239	9.36149	0.529161	HLA-L	major histocompatibility complex, class I, L (pseudogene)
8096771	2.66e-07	1.37e-08	6.9716	9.35888	0.597808	OSTC	oligosaccharyltransferase complex non-catalytic subunit
8178977	2.66e-07	1.37e-08	6.97157	9.35877	1.08258	TAPBP	TAP binding protein (tapasin)
8067248	2.7e-07	1.39e-08	6.96713	9.34405	0.745525	PPP4R1L	protein phosphatase 4 regulatory subunit 1 like (pseudogene)
8102065	2.72e-07	1.4e-08	-6.96527	9.33787	-1.15675	BDH2	3-hydroxybutyrate dehydrogenase, type 2
7933723	2.72e-07	1.41e-08	6.96448	9.33525	0.853693	IPMK	inositol polyphosphate multikinase
7942381	2.74e-07	1.41e-08	6.96286	9.32989	0.551449	ATG16L2	autophagy related 16 like 2
8042259	2.76e-07	1.43e-08	-6.96036	9.32159	-0.921488	MDH1	malate dehydrogenase 1
7944931	2.83e-07	1.46e-08	6.95229	9.29484	1.4426	SLC37A2	solute carrier family 37 member 2
7940840	2.84e-07	1.47e-08	-6.95103	9.29065	-0.428702	OTUB1	OTU deubiquitinase, ubiquitin aldehyde binding 1
8154531	2.85e-07	1.47e-08	6.95052	9.28894	0.58223	DENND4C	DENN domain containing 4C
8136095	2.85e-07	1.47e-08	-6.9502	9.28789	-1.31502	AHCYL2	adenosylhomocysteinase like 2
8139640	2.85e-07	1.48e-08	-6.94987	9.28679	-3.40863	DDC	dopa decarboxylase
7970162	2.85e-07	1.48e-08	6.94977	9.28646	1.19952	ATP11A	ATPase phospholipid transporting 11A
8019885	2.85e-07	1.48e-08	6.94931	9.28494	0.84181	SMCHD1	structural maintenance of chromosomes flexible hinge domain containing 1
8098611	2.86e-07	1.49e-08	6.94785	9.2801	1.8492	TLR3	toll like receptor 3
7958577	2.89e-07	1.5e-08	-6.94515	9.27112	-0.333035	FAM222A	family with sequence similarity 222 member A
7904907	2.89e-07	1.5e-08	-6.94509	9.27095	-0.865257	BCL9	B-cell CLL/lymphoma 9
8113250	2.89e-07	1.5e-08	6.94444	9.26878	0.997832	ERAP1	endoplasmic reticulum aminopeptidase 1
8099541	2.92e-07	1.52e-08	-6.94103	9.25747	-1.7527	QDPR	quinoid dihydropteridine reductase
8004331	2.94e-07	1.53e-08	6.93897	9.25062	0.683183	KCTD11///ACAP1	potassium channel tetramerization domain containing 11///ArfGAP with coiled-coil, ankyrin repeat and PH domains 1
8089759	2.94e-07	1.53e-08	6.93886	9.25026	0.784568	TMEM39A	transmembrane protein 39A
7902367	2.94e-07	1.53e-08	-6.93839	9.2487	-1.45769	ACADM	acyl-CoA dehydrogenase, C-4 to C-12 straight chain
8063785	2.94e-07	1.53e-08	6.9383	9.2484	0.400529	C20orf197	chromosome 20 open reading frame 197
8157727	2.96e-07	1.54e-08	6.93631	9.24181	1.27209	GPR21	G protein-coupled receptor 21
8178489	2.96e-07	1.55e-08	6.93588	9.24039	0.651546	HLA-C///HLA-B///HLA-A///HLA-B///HLA-A	major histocompatibility complex, class I, C///major histocompatibility complex, class I, B///major histocompatibility complex, class I, A///major histocompatibility complex, class I, B///major histocompatibility complex, class I, A
8003922	2.96e-07	1.55e-08	-6.93559	9.23941	-0.830839	MED11	mediator complex subunit 11
7935180	2.97e-07	1.56e-08	6.93398	9.23409	1.46547	PDLIM1	PDZ and LIM domain 1
8032608	3.01e-07	1.58e-08	-6.92998	9.22081	-0.914641	MFSD12	major facilitator superfamily domain containing 12
8180257	3.05e-07	1.61e-08	6.92491	9.204	1.20791	CEP170	centrosomal protein 170
8017437	3.05e-07	1.61e-08	-6.92488	9.20389	-0.534345	FTSJ3	FtsJ homolog 3
8064522	3.05e-07	1.61e-08	-6.92487	9.20384	-0.471524	IDH3B	isocitrate dehydrogenase 3 (NAD(+)) beta
8097282	3.06e-07	1.61e-08	6.92458	9.20289	1.64805	SPRY1	sprouty RTK signaling antagonist 1
7906904	3.13e-07	1.65e-08	6.91733	9.17884	0.948877	HSD17B7P2///HSD17B7	hydroxysteroid 17-beta dehydrogenase 7 pseudogene 2///hydroxysteroid 17-beta dehydrogenase 7
7951873	3.13e-07	1.65e-08	-6.91664	9.17654	-0.577425	SIK3	SIK family kinase 3
7915870	3.16e-07	1.66e-08	-6.91414	9.16824	-0.591905	ATPAF1	ATP synthase mitochondrial F1 complex assembly factor 1
7960411	3.17e-07	1.67e-08	6.91293	9.16423	0.677243	C12orf4	chromosome 12 open reading frame 4
7909350	3.17e-07	1.67e-08	-6.91249	9.16279	-2.05379	CR2	complement component 3d receptor 2
8077550	3.17e-07	1.67e-08	-6.91223	9.16191	-0.613455	MTMR14	myotubularin related protein 14
8178508	3.18e-07	1.68e-08	-6.91138	9.1591	-0.440199	ATP6V1G2-DDX39B///ATP6V1G2	ATP6V1G2-DDX39B readthrough (NMD candidate)///ATPase H+ transporting V1 subunit G2
8155673	3.19e-07	1.69e-08	-6.9099	9.15419	-0.940016	PIP5K1B	phosphatidylinositol-4-phosphate 5-kinase type 1 beta
8153021	3.2e-07	1.69e-08	-6.90937	9.15241	-1.20769	ST3GAL1	ST3 beta-galactoside alpha-2,3-sialyltransferase 1
8125748	3.2e-07	1.7e-08	-6.90838	9.14914	-0.592462	LYPLA2	lysophospholipase II
8066848	3.22e-07	1.7e-08	6.9069	9.14424	1.27822	PREX1	phosphatidylinositol-3,4,5-trisphosphate dependent Rac exchange factor 1
8000638	3.23e-07	1.71e-08	6.90587	9.14081	0.528377	SMG1P3///SMG1P1///SMG1P5///SMG1	SMG1P3, nonsense mediated mRNA decay associated PI3K related kinase pseudogene 3///SMG1P1, nonsense mediated mRNA decay associated PI3K related kinase pseudogene 1///SMG1P5, nonsense mediated mRNA decay associated PI3K related kinase pseudogene 5///SMG1, nonsense mediated mRNA decay associated PI3K related kinase
8025563	3.23e-07	1.71e-08	6.90553	9.13968	0.395391	PPAN-P2RY11///PPAN///P2RY11	PPAN-P2RY11 readthrough///peter pan homolog (Drosophila)///purinergic receptor P2Y11
8159078	3.24e-07	1.72e-08	-6.90431	9.13564	-0.500329	CACFD1	calcium channel flower domain containing 1
7898677	3.25e-07	1.73e-08	-6.90298	9.13123	-1.18648	HS6ST1	heparan sulfate 6-O-sulfotransferase 1
7952408	3.26e-07	1.73e-08	-6.90214	9.12843	-0.624367	SIAE	sialic acid acetylesterase
8072876	3.26e-07	1.73e-08	6.90166	9.12684	1.32593	LGALS1	galectin 1
8086784	3.27e-07	1.74e-08	-6.90087	9.1242	-0.441284	ELP6	elongator acetyltransferase complex subunit 6
8102998	3.3e-07	1.76e-08	-6.89767	9.11359	-1.47731	GYPA	glycophorin A (MNS blood group)
8029489	3.32e-07	1.77e-08	-6.89609	9.10835	-1.56359	BCAM	basal cell adhesion molecule (Lutheran blood group)
8013696	3.33e-07	1.77e-08	-6.89537	9.10595	-0.626703	KIAA0100	KIAA0100
7903893	3.33e-07	1.77e-08	6.89505	9.10489	1.89249	CD53	CD53 molecule
8005994	3.36e-07	1.79e-08	-6.89238	9.09604	-0.739108	ERAL1	Era like 12S mitochondrial rRNA chaperone 1
7942553	3.36e-07	1.79e-08	6.89163	9.09353	0.388754	SPCS2///SPCS2	signal peptidase complex subunit 2///signal peptidase complex subunit 2
8162147	3.36e-07	1.79e-08	6.89154	9.09324	0.712744	ZCCHC6	zinc finger CCHC-type containing 6
8098041	3.36e-07	1.8e-08	6.89104	9.09157	1.00726	TMEM144	transmembrane protein 144
8063337	3.38e-07	1.81e-08	6.88919	9.08545	1.09915	ZFAS1	ZNFX1 antisense RNA 1
8035886	3.4e-07	1.82e-08	-6.88775	9.08067	-0.580599	C19orf12	chromosome 19 open reading frame 12
8030582	3.41e-07	1.82e-08	-6.88677	9.07741	-0.629599	MYH14	myosin, heavy chain 14, non-muscle
7906642	3.41e-07	1.83e-08	-6.88615	9.07534	-0.560557	KLHDC9	kelch domain containing 9
8027778	3.43e-07	1.84e-08	6.88485	9.07105	1.00441	FXYD5	FXYD domain containing ion transport regulator 5
7945162	3.44e-07	1.84e-08	6.88368	9.06715	1.83445	BARX2	BARX homeobox 2
7916570	3.44e-07	1.84e-08	-6.88339	9.06618	-0.660645	OMA1	OMA1 zinc metallopeptidase
8075971	3.44e-07	1.85e-08	-6.88269	9.06386	-0.487007	ANKRD54	ankyrin repeat domain 54
7970569	3.46e-07	1.86e-08	6.88125	9.05907	1.36425	SACS	sacsin molecular chaperone
8003948	3.46e-07	1.86e-08	-6.88123	9.05904	-0.457353	GLTPD2	glycolipid transfer protein domain containing 2
8087576	3.5e-07	1.88e-08	-6.87777	9.04752	-0.42221	IFRD2	interferon related developmental regulator 2
8136591	3.53e-07	1.9e-08	6.87481	9.03772	0.806912	ADCK2	aarF domain containing kinase 2
7948211	3.59e-07	1.93e-08	6.86939	9.01972	0.599603	SSRP1	structure specific recognition protein 1
8068857	3.61e-07	1.94e-08	-6.86761	9.01381	-0.630274	NDUFV3	NADH:ubiquinone oxidoreductase subunit V3
8147580	3.61e-07	1.95e-08	6.86723	9.01256	0.707157	VPS13B	vacuolar protein sorting 13 homolog B
8082667	3.66e-07	1.97e-08	-6.86345	9	-1.05986	NUDT16	nudix hydrolase 16
7908347	3.68e-07	1.98e-08	6.86182	8.9946	1.32975	OCLM	oculomedin
7960117	3.7e-07	2e-08	-6.85985	8.98806	-1.9697	PXMP2	peroxisomal membrane protein 2
8042519	3.7e-07	2e-08	-6.85965	8.98739	-0.924706	PCYOX1	prenylcysteine oxidase 1
7968678	3.7e-07	2e-08	-6.85956	8.98707	-2.31498	FREM2	FRAS1 related extracellular matrix protein 2
8146403	3.7e-07	2e-08	-6.85937	8.98644	-0.357366	SNTG1	syntrophin gamma 1
8045381	3.75e-07	2.03e-08	6.85472	8.971	0.50382	CCNT2	cyclin T2
8150797	3.82e-07	2.07e-08	-6.84947	8.95358	-0.682555	ATP6V1H	ATPase H+ transporting V1 subunit H
7970624	3.85e-07	2.08e-08	6.84694	8.94518	0.698516	CENPJ	centromere protein J
7905826	3.87e-07	2.1e-08	6.84525	8.93956	0.589341	CKS1B	CDC28 protein kinase regulatory subunit 1B
7902874	3.88e-07	2.11e-08	6.84367	8.93431	0.949916	LRRC8C	leucine rich repeat containing 8 family member C
8056798	3.9e-07	2.12e-08	6.842	8.92879	0.408983	SP3	Sp3 transcription factor
8073585	3.91e-07	2.12e-08	-6.84119	8.92609	-0.454563	SERHL2///SERHL	serine hydrolase-like 2///serine hydrolase-like (pseudogene)
7908940	3.95e-07	2.15e-08	6.83789	8.91512	0.9271	ATP2B4	ATPase plasma membrane Ca2+ transporting 4
8117485	4e-07	2.18e-08	6.83389	8.90187	0.694752	BTN2A1	butyrophilin subfamily 2 member A1
8180353	4.02e-07	2.19e-08	-6.83245	8.89706	-0.645239	ENSA	endosulfine alpha
8059477	4.04e-07	2.2e-08	-6.83062	8.89098	-0.646911	COL4A4	collagen type IV alpha 4 chain
8101609	4.04e-07	2.2e-08	6.83038	8.89018	0.917532	SLC10A6	solute carrier family 10 member 6
7943605	4.04e-07	2.2e-08	-6.83012	8.88934	-1.56635	ACAT1	acetyl-CoA acetyltransferase 1
8102482	4.05e-07	2.21e-08	6.82898	8.88554	1.28074	SEC24D	SEC24 homolog D, COPII coat complex component
8021120	4.06e-07	2.22e-08	6.82811	8.88265	0.894098	RNF165	ring finger protein 165
7945767	4.07e-07	2.22e-08	-6.82769	8.88125	-0.314445	CDKN1C	cyclin dependent kinase inhibitor 1C
7934255	4.08e-07	2.23e-08	-6.82676	8.87818	-0.885686	MICU1	mitochondrial calcium uptake 1
8029536	4.15e-07	2.27e-08	6.82122	8.85978	2.22916	APOC1	apolipoprotein C1
8064415	4.16e-07	2.28e-08	6.82044	8.85719	0.7169	TMEM74B	transmembrane protein 74B
8056359	4.19e-07	2.3e-08	-6.81812	8.84947	-0.750373	SNORA70F	small nucleolar RNA, H/ACA box 70F
7948379	4.22e-07	2.31e-08	-6.81591	8.84214	-0.396018	OSBP	oxysterol binding protein
7901497	4.27e-07	2.35e-08	-6.81162	8.82789	-1.512	ZYG11A	zyg-11 family member A, cell cycle regulator
8008682	4.32e-07	2.38e-08	-6.80782	8.81526	-0.788264	MSI2	musashi RNA binding protein 2
8051820	4.32e-07	2.38e-08	6.80762	8.81462	0.417188	THADA	THADA, armadillo repeat containing
8066513	4.34e-07	2.39e-08	-6.80602	8.8093	-1.37246	SDC4///ROS1	syndecan 4///ROS proto-oncogene 1, receptor tyrosine kinase
8079117	4.39e-07	2.42e-08	-6.80263	8.79804	-0.693411	ACKR2	atypical chemokine receptor 2
8037205	4.4e-07	2.42e-08	-6.80175	8.7951	-1.7317	CEACAM1	carcinoembryonic antigen related cell adhesion molecule 1
8113773	4.4e-07	2.43e-08	-6.80119	8.79326	-1.27133	ALDH7A1	aldehyde dehydrogenase 7 family member A1
7948424	4.44e-07	2.45e-08	-6.79888	8.78557	-0.576828	MRPL16	mitochondrial ribosomal protein L16
8055130	4.45e-07	2.46e-08	-6.79755	8.78117	-1.00655	HS6ST1	heparan sulfate 6-O-sulfotransferase 1
8016476	4.45e-07	2.46e-08	-6.79751	8.78102	-1.74448	HOXB9	homeobox B9
8144322	4.47e-07	2.47e-08	-6.79612	8.77642	-0.876436	MYOM2	myomesin 2
7991598	4.5e-07	2.49e-08	6.79388	8.76896	1.01584	SNRPA1	small nuclear ribonucleoprotein polypeptide A'
8164653	4.56e-07	2.53e-08	-6.78931	8.75378	-0.731318	UCK1	uridine-cytidine kinase 1
8146687	4.57e-07	2.53e-08	-6.7886	8.75143	-1.46778	ADHFE1	alcohol dehydrogenase, iron containing 1
8114861	4.59e-07	2.54e-08	6.78757	8.74801	0.635738	LARS	leucyl-tRNA synthetase
7975045	4.59e-07	2.55e-08	-6.78728	8.74705	-1.02023	MTHFD1	methylenetetrahydrofolate dehydrogenase, cyclohydrolase and formyltetrahydrofolate synthetase 1
8000217	4.59e-07	2.55e-08	6.78713	8.74654	0.541321	BOLA2-SMG1P6///SMG1P3///SMG1P1///SMG1P5///BOLA2///SMG1P2///SMG1	BOLA2-SMG1P6 readthrough///SMG1P3, nonsense mediated mRNA decay associated PI3K related kinase pseudogene 3///SMG1P1, nonsense mediated mRNA decay associated PI3K related kinase pseudogene 1///SMG1P5, nonsense mediated mRNA decay associated PI3K related kinase pseudogene 5///bolA family member 2///SMG1P2, nonsense mediated mRNA decay associated PI3K related kinase pseudogene 2///SMG1, nonsense me…
7954717	4.64e-07	2.58e-08	6.78356	8.73467	1.20118	BICD1	BICD cargo adaptor 1
8105153	4.64e-07	2.58e-08	-6.7828	8.73216	-0.884719	NNT	nicotinamide nucleotide transhydrogenase
8009653	4.64e-07	2.58e-08	6.78275	8.73199	1.54121	CD300A	CD300a molecule
7933204	4.71e-07	2.62e-08	6.77821	8.71693	1.97399	C10orf10	chromosome 10 open reading frame 10
8115895	4.72e-07	2.63e-08	-6.77776	8.71543	-1.04576	KIAA1191	KIAA1191
7924508	4.73e-07	2.64e-08	-6.7769	8.71258	-1.05489	SUSD4	sushi domain containing 4
7929677	4.74e-07	2.64e-08	-6.7761	8.70989	-0.828448	PI4K2A	phosphatidylinositol 4-kinase type 2 alpha
7942332	4.75e-07	2.65e-08	-6.77549	8.70789	-2.33446	FOLR1	folate receptor 1
8149774	4.75e-07	2.65e-08	6.77494	8.70607	2.68561	LOXL2	lysyl oxidase like 2
7973702	4.78e-07	2.67e-08	6.77289	8.69923	0.405548	LTB4R2///LTB4R	leukotriene B4 receptor 2///leukotriene B4 receptor
8180326	4.8e-07	2.68e-08	6.77157	8.69486	0.431116	BAGE4	B melanoma antigen family member 4
7904084	4.8e-07	2.68e-08	-6.7714	8.69429	-0.67703	AKR7A2P1	aldo-keto reductase family 7 member A2 pseudogene 1
7947801	4.84e-07	2.71e-08	-6.7688	8.68567	-0.492976	PACSIN3	protein kinase C and casein kinase substrate in neurons 3
7991357	4.87e-07	2.72e-08	-6.76707	8.67992	-0.708196	C15orf38-AP3S2///AP3S2	C15orf38-AP3S2 readthrough///adaptor related protein complex 3 sigma 2 subunit
7999752	4.87e-07	2.73e-08	-6.76671	8.67871	-0.886476	LYRM2///ZC3H11A	LYR motif containing 2///zinc finger CCCH-type containing 11A
8059413	4.87e-07	2.73e-08	6.76649	8.67798	1.46244	DOCK10	dedicator of cytokinesis 10
7982287	4.88e-07	2.74e-08	6.76556	8.67491	1.07583	ARHGAP11B	Rho GTPase activating protein 11B
7981488	4.88e-07	2.74e-08	6.76543	8.67447	0.485401	TMEM179	transmembrane protein 179
8001507	4.92e-07	2.77e-08	-6.76257	8.66495	-0.491372	BBS2	Bardet-Biedl syndrome 2
8133258	4.96e-07	2.79e-08	-6.75998	8.65636	-0.490973	WBSCR17	Williams-Beuren syndrome chromosome region 17
8079753	4.97e-07	2.8e-08	-6.75899	8.65306	-0.618281	DAG1	dystroglycan 1
8180166	4.97e-07	2.8e-08	6.75871	8.65212	1.04625	TAPBP	TAP binding protein (tapasin)
8124889	5.01e-07	2.82e-08	6.75629	8.64411	1.29548	POU5F1P4///POU5F1P3///POU5F1B///POU5F1	POU class 5 homeobox 1 pseudogene 4///POU class 5 homeobox 1 pseudogene 3///POU class 5 homeobox 1B///POU class 5 homeobox 1
8179719	5.01e-07	2.82e-08	6.75629	8.64411	1.29548	POU5F1P4///POU5F1P3///POU5F1B///POU5F1	POU class 5 homeobox 1 pseudogene 4///POU class 5 homeobox 1 pseudogene 3///POU class 5 homeobox 1B///POU class 5 homeobox 1
7995926	5.03e-07	2.84e-08	6.75483	8.63924	1.18467	NLRC5	NLR family CARD domain containing 5
7984524	5.05e-07	2.85e-08	-6.75313	8.6336	-1.58576	PAQR5	progestin and adipoQ receptor family member 5
7930170	5.06e-07	2.86e-08	-6.75268	8.63211	-0.719375	BORCS7-ASMT///BORCS7	BORCS7-ASMT readthrough (NMD candidate)///BLOC-1 related complex subunit 7
7999598	5.07e-07	2.87e-08	6.75178	8.6291	0.849026	NTAN1	N-terminal asparagine amidase
8144528	5.08e-07	2.88e-08	6.75074	8.62566	0.572816	TNKS	tankyrase
8160968	5.09e-07	2.88e-08	-6.7503	8.6242	-0.799192	STOML2	stomatin like 2
8109912	5.18e-07	2.94e-08	-6.74427	8.60417	-1.33636	KCNIP1	potassium voltage-gated channel interacting protein 1
8074388	5.19e-07	2.95e-08	-6.74358	8.60187	-1.0059	SLC25A1	solute carrier family 25 member 1
8131519	5.19e-07	2.95e-08	6.74336	8.60114	0.53111	PHF14	PHD finger protein 14
8023575	5.21e-07	2.96e-08	-6.74217	8.59718	-0.726049	CCBE1	collagen and calcium binding EGF domains 1
8117800	5.21e-07	2.96e-08	6.74208	8.59689	0.631883	HLA-H///HLA-C///HLA-B///HLA-A///HLA-A	major histocompatibility complex, class I, H (pseudogene)///major histocompatibility complex, class I, C///major histocompatibility complex, class I, B///major histocompatibility complex, class I, A///major histocompatibility complex, class I, A
8123315	5.23e-07	2.98e-08	6.74044	8.59144	0.713149	QKI	QKI, KH domain containing RNA binding
8027701	5.26e-07	3e-08	6.73857	8.58521	0.626082	GRAMD1A	GRAM domain containing 1A
7975324	5.26e-07	3e-08	-6.7384	8.58465	-1.18832	GALNT16	polypeptide N-acetylgalactosaminyltransferase 16
8056766	5.27e-07	3e-08	-6.73807	8.58357	-0.834811	SLC25A12	solute carrier family 25 member 12
7939465	5.34e-07	3.05e-08	-6.73359	8.56866	-0.649378	HSD17B12	hydroxysteroid 17-beta dehydrogenase 12
8111584	5.35e-07	3.05e-08	6.73317	8.56727	0.502614	C5orf42	chromosome 5 open reading frame 42
8149448	5.4e-07	3.09e-08	6.72977	8.556	1.94025	MSR1	macrophage scavenger receptor 1
8154316	5.47e-07	3.13e-08	6.72577	8.54267	0.685668	UHRF2	ubiquitin like with PHD and ring finger domains 2
8124942	5.47e-07	3.13e-08	-6.72544	8.54158	-0.543261	ATP6V1G2-DDX39B///ATP6V1G2	ATP6V1G2-DDX39B readthrough (NMD candidate)///ATPase H+ transporting V1 subunit G2
8179762	5.47e-07	3.13e-08	-6.72544	8.54158	-0.543261	ATP6V1G2-DDX39B///ATP6V1G2	ATP6V1G2-DDX39B readthrough (NMD candidate)///ATPase H+ transporting V1 subunit G2
8064581	5.48e-07	3.14e-08	-6.72506	8.54032	-0.495255	FASTKD5///UBOX5	FAST kinase domains 5///U-box domain containing 5
8052803	5.48e-07	3.14e-08	-6.72484	8.53959	-0.486192	AAK1	AP2 associated kinase 1
8013908	5.5e-07	3.15e-08	6.72343	8.53491	0.438866	NUFIP2	NUFIP2, FMR1 interacting protein 2
8132092	5.52e-07	3.17e-08	-6.7222	8.53084	-1.16532	INMT-FAM188B///INMT	INMT-FAM188B readthrough (NMD candidate)///indolethylamine N-methyltransferase
8173917	5.54e-07	3.18e-08	-6.72103	8.52693	-0.683622	NAP1L3	nucleosome assembly protein 1 like 3
7967287	5.56e-07	3.19e-08	6.71952	8.52191	0.476488	ZCCHC8	zinc finger CCHC-type containing 8
7961287	5.59e-07	3.22e-08	6.71756	8.51541	0.786589	TAS2R19	taste 2 receptor member 19
7942527	5.6e-07	3.22e-08	-6.71671	8.51258	-0.798603	POLD3	DNA polymerase delta 3, accessory subunit
8067610	5.61e-07	3.23e-08	-6.71615	8.51072	-0.518283	CHRNA4	cholinergic receptor nicotinic alpha 4 subunit
8090044	5.61e-07	3.23e-08	6.71578	8.5095	2.29749	SEMA5B	semaphorin 5B
7952768	5.63e-07	3.25e-08	-6.71483	8.50633	-0.464376	SNX19	sorting nexin 19
8105633	5.69e-07	3.28e-08	6.71135	8.49476	0.535147	PPWD1	peptidylprolyl isomerase domain and WD repeat containing 1
8001531	5.69e-07	3.29e-08	-6.71106	8.4938	-2.41647	MT1G	metallothionein 1G
8113914	5.78e-07	3.34e-08	6.70633	8.47807	0.613542	FNIP1	folliculin interacting protein 1
8085287	5.79e-07	3.35e-08	-6.70546	8.4752	-0.846986	BRK1	BRICK1, SCAR/WAVE actin nucleating complex subunit
8002792	5.8e-07	3.35e-08	-6.70515	8.47415	-0.396818	FA2H	fatty acid 2-hydroxylase
7972946	5.82e-07	3.37e-08	6.70367	8.46925	1.34328	RASA3	RAS p21 protein activator 3
7955908	5.82e-07	3.37e-08	6.70331	8.46805	2.02534	NCKAP1L	NCK associated protein 1 like
8180327	5.83e-07	3.38e-08	6.7028	8.46636	0.429549	BAGE3	B melanoma antigen family member 3
7915500	5.84e-07	3.39e-08	-6.70219	8.46432	-1.86958	C1orf210	chromosome 1 open reading frame 210
8149877	5.84e-07	3.39e-08	6.7017	8.46271	1.39874	PNMA2	paraneoplastic Ma antigen 2
8151281	5.88e-07	3.41e-08	6.6997	8.45604	0.643115	TRAM1	translocation associated membrane protein 1
7966706	5.88e-07	3.42e-08	6.6996	8.45573	0.629417	MED13L	mediator complex subunit 13 like
8050060	5.93e-07	3.45e-08	-6.69677	8.44633	-0.564861	TSSC1	tumor suppressing subtransferable candidate 1
8037657	6.02e-07	3.5e-08	-6.69222	8.43119	-0.538835	DMPK	dystrophia myotonica protein kinase
8066279	6.03e-07	3.51e-08	-6.6916	8.42915	-0.830751	ZHX3	zinc fingers and homeoboxes 3
8027205	6.1e-07	3.55e-08	-6.68794	8.41698	-0.476753	NDUFA13	NADH:ubiquinone oxidoreductase subunit A13
8142232	6.1e-07	3.55e-08	-6.68779	8.41648	-0.687415	LAMB4	laminin subunit beta 4
7929201	6.1e-07	3.56e-08	6.68756	8.41571	0.665177	BTAF1	B-TFIID TATA-box binding protein associated factor 1
8051422	6.12e-07	3.57e-08	6.68647	8.4121	0.26973	MYADML	myeloid associated differentiation marker like (pseudogene)
7947624	6.13e-07	3.57e-08	6.68599	8.4105	0.5142	PHF21A	PHD finger protein 21A
8079346	6.13e-07	3.58e-08	-6.68556	8.40907	-0.605136	SACM1L	SAC1 suppressor of actin mutations 1-like (yeast)
8008454	6.13e-07	3.58e-08	6.68541	8.40857	1.79807	ABCC3	ATP binding cassette subfamily C member 3
7925062	6.13e-07	3.59e-08	6.68511	8.40757	1.3319	SIPA1L2	signal induced proliferation associated 1 like 2
8150988	6.16e-07	3.6e-08	6.68394	8.40368	0.777476	ASPH	aspartate beta-hydroxylase
8174794	6.17e-07	3.61e-08	6.68313	8.40099	0.468736	CUL4B	cullin 4B
7933982	6.22e-07	3.65e-08	-6.68018	8.39118	-2.31505	PBLD	phenazine biosynthesis like protein domain containing
8066195	6.23e-07	3.65e-08	-6.67948	8.38885	-0.4845	BLCAP	bladder cancer associated protein
8088001	6.24e-07	3.66e-08	-6.67903	8.38734	-0.43529	NEK4	NIMA related kinase 4
7970111	6.32e-07	3.71e-08	6.67468	8.37289	0.669155	ARHGEF7	Rho guanine nucleotide exchange factor 7
8031238	6.36e-07	3.74e-08	6.67288	8.36691	1.7797	LILRB4	leukocyte immunoglobulin like receptor B4
8077879	6.4e-07	3.76e-08	-6.67084	8.36014	-0.789702	SYN2	synapsin II
8003875	6.48e-07	3.81e-08	-6.66707	8.34762	-1.29798	SPNS2	sphingolipid transporter 2
8116655	6.48e-07	3.81e-08	-6.66684	8.34684	-0.418865	PSMG4	proteasome assembly chaperone 4
7956697	6.49e-07	3.82e-08	6.66613	8.34448	0.482358	MON2	MON2 homolog, regulator of endosome-to-Golgi trafficking
8139411	6.65e-07	3.92e-08	-6.65845	8.31895	-0.644264	TMED4	transmembrane p24 trafficking protein 4
8137448	6.65e-07	3.92e-08	-6.65818	8.31805	-1.23178	GALNT11	polypeptide N-acetylgalactosaminyltransferase 11
8128383	6.67e-07	3.93e-08	-6.65742	8.31552	-0.510772	COQ3	coenzyme Q3, methyltransferase
8028524	6.7e-07	3.96e-08	-6.65561	8.30951	-0.565983	ACTN4	actinin alpha 4
7926223	6.77e-07	4e-08	6.65224	8.29831	0.940879	CAMK1D	calcium/calmodulin dependent protein kinase ID
8006906	6.83e-07	4.04e-08	-6.64968	8.28979	-1.44103	ERBB2	erb-b2 receptor tyrosine kinase 2
8037005	6.87e-07	4.06e-08	6.64776	8.28341	1.29556	TGFB1	transforming growth factor beta 1
7954789	6.95e-07	4.12e-08	6.64394	8.27073	0.578479	ALG10B///ALG10	ALG10B, alpha-1,2-glucosyltransferase///ALG10, alpha-1,2-glucosyltransferase
8109528	7e-07	4.14e-08	-6.64205	8.26445	-1.45425	CYFIP2	cytoplasmic FMR1 interacting protein 2
8067011	7.05e-07	4.18e-08	6.63973	8.25672	0.397523	ADNP	activity dependent neuroprotector homeobox
7957890	7.09e-07	4.21e-08	6.6376	8.24964	0.598511	UTP20	UTP20, small subunit processome component
8089970	7.1e-07	4.21e-08	-6.6371	8.24798	-0.945378	ILDR1	immunoglobulin like domain containing receptor 1
8123598	7.22e-07	4.29e-08	6.63191	8.23073	0.753635	SERPINB1	serpin family B member 1
7942964	7.24e-07	4.3e-08	6.63101	8.22775	0.714764	TMEM135	transmembrane protein 135
8037794	7.25e-07	4.31e-08	6.63025	8.22521	0.617703	PRKD2	protein kinase D2
8136535	7.25e-07	4.31e-08	-6.63004	8.22453	-0.548663	C7orf55-LUC7L2///FMC1	C7orf55-LUC7L2 readthrough///formation of mitochondrial complex V assembly factor 1 homolog
8160036	7.25e-07	4.32e-08	-6.6296	8.22305	-0.613939	TMEM261///TMEM261	transmembrane protein 261///transmembrane protein 261
7989335	7.26e-07	4.33e-08	6.62916	8.22159	0.998263	ANXA2	annexin A2
7947917	7.26e-07	4.33e-08	-6.62906	8.22125	-0.425755	KBTBD4	kelch repeat and BTB domain containing 4
8141317	7.28e-07	4.34e-08	-6.62796	8.21761	-0.883558	CYP3A4///CYP3A4	cytochrome P450 family 3 subfamily A member 4///cytochrome P450 family 3 subfamily A member 4
8126279	7.28e-07	4.35e-08	6.62777	8.21697	1.41692	TREM2	triggering receptor expressed on myeloid cells 2
8088526	7.3e-07	4.36e-08	-6.62708	8.21469	-0.454305	THOC7	THO complex 7
8040695	7.34e-07	4.38e-08	6.62523	8.20852	1.85189	KCNK3	potassium two pore domain channel subfamily K member 3
8021741	7.35e-07	4.39e-08	-6.62462	8.20651	-0.662729	CNDP1	carnosine dipeptidase 1
7990400	7.35e-07	4.4e-08	-6.62432	8.2055	-0.650476	ULK3	unc-51 like kinase 3
8080487	7.38e-07	4.41e-08	-6.62316	8.20165	-0.70842	PRKCD	protein kinase C delta
7956639	7.4e-07	4.43e-08	-6.62228	8.19873	-0.773852	TSFM	Ts translation elongation factor, mitochondrial
8160805	7.51e-07	4.5e-08	6.61717	8.18173	0.654508	FAM219A	family with sequence similarity 219 member A
8173120	7.54e-07	4.53e-08	-6.61575	8.17701	-0.409077	PFKFB1	6-phosphofructo-2-kinase/fructose-2,6-biphosphatase 1
8145977	7.54e-07	4.53e-08	6.61568	8.17678	0.961687	PLEKHA2	pleckstrin homology domain containing A2
8168470	7.56e-07	4.54e-08	-6.61495	8.17434	-0.981023	COX7B	cytochrome c oxidase subunit 7B
8159249	7.57e-07	4.55e-08	-6.61441	8.17256	-0.688109	MRPS2	mitochondrial ribosomal protein S2
8128459	7.57e-07	4.55e-08	-6.6143	8.17221	-2.14306	SIM1	single-minded family bHLH transcription factor 1
8101699	7.59e-07	4.56e-08	-6.61342	8.16925	-0.73421	PPM1K	protein phosphatase, Mg2+/Mn2+ dependent 1K
8097128	7.64e-07	4.6e-08	6.61084	8.16068	0.504139	EXOSC9	exosome component 9
8180408	7.64e-07	4.6e-08	6.61078	8.16048	0.725877	NPM1	nucleophosmin
8048782	7.64e-07	4.6e-08	-6.61067	8.16013	-0.98072	COL4A3	collagen type IV alpha 3 chain
8057486	7.64e-07	4.6e-08	-6.61057	8.15978	-1.89533	PDE1A	phosphodiesterase 1A
7956795	7.65e-07	4.62e-08	6.60988	8.1575	0.462322	TBK1	TANK binding kinase 1
8109254	7.7e-07	4.65e-08	6.60781	8.15062	0.389622	TCOF1	treacle ribosome biogenesis factor 1
8119858	7.79e-07	4.7e-08	6.60438	8.13921	0.762174	POLH	DNA polymerase eta
7901687	7.8e-07	4.71e-08	-6.60362	8.13668	-0.520078	TMEM61	transmembrane protein 61
8150928	7.87e-07	4.76e-08	6.60061	8.12667	0.713614	NSMAF	neutral sphingomyelinase activation associated factor
8067802	7.98e-07	4.83e-08	6.59646	8.11287	0.427372	RGS19	regulator of G-protein signaling 19
8114778	7.98e-07	4.83e-08	-6.5962	8.11202	-0.969287	LOC729080///GCSH	glycine cleavage system protein H (aminomethyl carrier) pseudogene///glycine cleavage system protein H
8174317	7.98e-07	4.84e-08	-6.59583	8.11078	-0.463259	RIPPLY1	ripply transcriptional repressor 1
8110417	8.03e-07	4.87e-08	6.59407	8.10495	1.98809	FAM153C///FAM153A///FAM153B	family with sequence similarity 153, member C///family with sequence similarity 153 member A///family with sequence similarity 153 member B
7907572	8.03e-07	4.87e-08	-6.59367	8.10361	-2.64517	PAPPA2	pappalysin 2
8179313	8.09e-07	4.91e-08	6.59139	8.09603	0.271653	C6orf25	chromosome 6 open reading frame 25
7926786	8.1e-07	4.92e-08	6.591	8.09474	1.80418	APBB1IP	amyloid beta precursor protein binding family B member 1 interacting protein
8155530	8.12e-07	4.93e-08	-6.59015	8.0919	-0.547338	LOC102724238///LOC100126582///FGF7P3///LOC403323///FGF7P6///FGF7	uncharacterized LOC102724238///uncharacterized LOC100126582///fibroblast growth factor 7 pseudogene 3///uncharacterized LOC403323///fibroblast growth factor 7 pseudogene 6///fibroblast growth factor 7
7925364	8.16e-07	4.96e-08	6.58853	8.0865	0.601048	HEATR1	HEAT repeat containing 1
7938951	8.16e-07	4.96e-08	-6.58815	8.08526	-1.60399	ANO5	anoctamin 5
8023735	8.21e-07	4.99e-08	6.58642	8.07951	0.46354	TMX3	thioredoxin related transmembrane protein 3
8072931	8.22e-07	5.01e-08	-6.58569	8.07706	-0.4763	GCAT	glycine C-acetyltransferase
8019762	8.22e-07	5.01e-08	6.58564	8.07691	0.953854	P4HB	prolyl 4-hydroxylase subunit beta
8036710	8.23e-07	5.01e-08	6.58526	8.07566	1.34688	GMFG	glia maturation factor gamma
7908597	8.35e-07	5.09e-08	6.58049	8.0598	1.42548	NR5A2	nuclear receptor subfamily 5 group A member 2
8087568	8.36e-07	5.11e-08	-6.57981	8.05752	-0.310017	MON1A	MON1 homolog A, secretory trafficking associated
8080562	8.38e-07	5.12e-08	-6.57914	8.0553	-2.88022	IL17RB	interleukin 17 receptor B
8036479	8.41e-07	5.14e-08	6.57773	8.0506	0.331654	YIF1B	Yip1 interacting factor homolog B, membrane trafficking protein
8052269	8.43e-07	5.16e-08	6.57681	8.04757	1.00769	CCDC88A	coiled-coil domain containing 88A
8109403	8.45e-07	5.17e-08	6.57584	8.04434	0.968346	MFAP3	microfibrillar associated protein 3
8156688	8.47e-07	5.19e-08	6.57502	8.04161	0.625262	TDRD7	tudor domain containing 7
8022310	8.48e-07	5.2e-08	6.57454	8.04002	1.95356	PIEZO2	piezo type mechanosensitive ion channel component 2
7923635	8.49e-07	5.2e-08	-6.57422	8.03894	-1.43135	PLEKHA6	pleckstrin homology domain containing A6
8101728	8.49e-07	5.21e-08	6.57393	8.03798	1.0555	FAM13A	family with sequence similarity 13 member A
8129888	8.58e-07	5.27e-08	-6.57041	8.02628	-1.24752	NHSL1	NHS like 1
8131263	8.58e-07	5.27e-08	6.57022	8.02565	1.12655	SNORD13P2	small nucleolar RNA, C/D box 13 pseudogene 2
7941639	8.58e-07	5.28e-08	-6.57006	8.02511	-1.03703	BBS1	Bardet-Biedl syndrome 1
8165995	8.58e-07	5.28e-08	-6.57005	8.02507	-0.502372	HCCS	holocytochrome c synthase
8014916	8.58e-07	5.28e-08	-6.56989	8.02455	-0.533091	ORMDL3	ORMDL sphingolipid biosynthesis regulator 3
8009227	8.6e-07	5.3e-08	-6.56895	8.02144	-0.714489	PSMC5	proteasome 26S subunit, ATPase 5
8152628	8.61e-07	5.3e-08	6.56853	8.02002	0.622131	DERL1	derlin 1
7924107	8.61e-07	5.3e-08	6.56846	8.0198	0.70791	LPGAT1	lysophosphatidylglycerol acyltransferase 1
8016825	8.65e-07	5.34e-08	-6.56653	8.01337	-0.673525	COX11	COX11, cytochrome c oxidase copper chaperone
7934945	8.67e-07	5.35e-08	-6.56575	8.0108	-1.35846	PANK1	pantothenate kinase 1
8149208	8.67e-07	5.36e-08	6.56556	8.01014	0.785065	LOC650293///OR7E125P///OR7E5P///OR7E91P///OR7E2P	seven transmembrane helix receptor///olfactory receptor family 7 subfamily E member 125 pseudogene///olfactory receptor family 7 subfamily E member 5 pseudogene///olfactory receptor family 7 subfamily E member 91 pseudogene///olfactory receptor family 7 subfamily E member 2 pseudogene
7985777	8.69e-07	5.37e-08	6.56493	8.00805	0.46939	ISG20	interferon stimulated exonuclease gene 20
7945652	8.7e-07	5.38e-08	6.56428	8.00588	0.576324	KRTAP5-3	keratin associated protein 5-3
8026579	8.73e-07	5.4e-08	-6.56333	8.00273	-0.629802	TMEM38A	transmembrane protein 38A
7912412	8.78e-07	5.43e-08	-6.5615	7.99666	-0.577519	MTOR	mechanistic target of rapamycin
8161520	8.85e-07	5.48e-08	-6.55889	7.98797	-1.47638	PGM5P2///PGM5	phosphoglucomutase 5 pseudogene 2///phosphoglucomutase 5
7931353	8.85e-07	5.49e-08	6.55847	7.98658	1.18322	PTPRE	protein tyrosine phosphatase, receptor type E
8161513	8.87e-07	5.5e-08	-6.55782	7.98441	-1.47269	PGM5P2///PGM5	phosphoglucomutase 5 pseudogene 2///phosphoglucomutase 5
8024358	8.89e-07	5.51e-08	-6.55707	7.98191	-0.540644	CSNK1G2	casein kinase 1 gamma 2
8000823	8.9e-07	5.53e-08	6.5562	7.97902	0.524721	SMG1P3///SMG1P1///SMG1P5///SMG1	SMG1P3, nonsense mediated mRNA decay associated PI3K related kinase pseudogene 3///SMG1P1, nonsense mediated mRNA decay associated PI3K related kinase pseudogene 1///SMG1P5, nonsense mediated mRNA decay associated PI3K related kinase pseudogene 5///SMG1, nonsense mediated mRNA decay associated PI3K related kinase
8026548	8.92e-07	5.54e-08	-6.5555	7.97671	-0.720002	AP1M1	adaptor related protein complex 1 mu 1 subunit
8052872	8.93e-07	5.55e-08	6.55515	7.97553	1.63637	TGFA	transforming growth factor alpha
8002218	8.97e-07	5.58e-08	-6.5532	7.96904	-1.08633	ESRP2	epithelial splicing regulatory protein 2
8017283	8.98e-07	5.59e-08	6.5529	7.96805	0.587767	INTS2	integrator complex subunit 2
7911532	8.98e-07	5.59e-08	-6.55257	7.96698	-0.488271	AURKAIP1	aurora kinase A interacting protein 1
7920472	8.99e-07	5.61e-08	6.5519	7.96473	0.414121	TPM3///ROS1	tropomyosin 3///ROS proto-oncogene 1, receptor tyrosine kinase
8080578	9.04e-07	5.64e-08	-6.55007	7.95865	-1.05469	CACNA2D3	calcium voltage-gated channel auxiliary subunit alpha2delta 3
7991904	9.06e-07	5.66e-08	-6.54931	7.95611	-0.733379	PIGQ	phosphatidylinositol glycan anchor biosynthesis class Q
7947784	9.06e-07	5.66e-08	-6.54929	7.95606	-0.64722	ARFGAP2	ADP ribosylation factor GTPase activating protein 2
8074927	9.13e-07	5.71e-08	-6.54654	7.94693	-1.03068	GUSBP11	glucuronidase, beta pseudogene 11
8173766	9.16e-07	5.73e-08	6.54561	7.94382	0.646398	BRWD3	bromodomain and WD repeat domain containing 3
8106730	9.21e-07	5.77e-08	6.54358	7.93708	0.553833	XRCC4	X-ray repair cross complementing 4
8129861	9.22e-07	5.77e-08	6.54316	7.93568	1.02034	IFNGR1	interferon gamma receptor 1
8062823	9.24e-07	5.79e-08	-6.54238	7.93309	-2.11706	HNF4A	hepatocyte nuclear factor 4 alpha
8107356	9.24e-07	5.79e-08	6.54214	7.93229	0.606604	DCP2	decapping mRNA 2
8143209	9.3e-07	5.83e-08	-6.54007	7.9254	-0.689003	SVOPL	SVOP like
8037723	9.33e-07	5.86e-08	-6.53871	7.92089	-0.391277	IRF2BP1	interferon regulatory factor 2 binding protein 1
8137008	9.41e-07	5.91e-08	-6.53626	7.91274	-1.10803	MPLKIP	M-phase specific PLK1 interacting protein
8006377	9.41e-07	5.92e-08	6.5359	7.91154	0.357921	ZNF207	zinc finger protein 207
7982889	9.46e-07	5.95e-08	6.5343	7.90621	1.35348	NUSAP1	nucleolar and spindle associated protein 1
8157381	9.46e-07	5.95e-08	-6.53412	7.90562	-0.651136	ZNF618	zinc finger protein 618
7975926	9.49e-07	5.97e-08	-6.53302	7.90196	-0.605429	CIPC	CLOCK interacting pacemaker
8041561	9.5e-07	5.98e-08	-6.53271	7.90095	-0.991308	MORN2	MORN repeat containing 2
7904396	9.5e-07	5.99e-08	-6.53239	7.89986	-4.01068	HAO2	hydroxyacid oxidase 2
8040292	9.54e-07	6.01e-08	-6.53109	7.89555	-0.721663	GREB1	growth regulation by estrogen in breast cancer 1
7906954	9.54e-07	6.02e-08	-6.53092	7.89499	-1.29111	PBX1	PBX homeobox 1
7923958	9.56e-07	6.03e-08	-6.53032	7.89297	-1.05781	C1orf116	chromosome 1 open reading frame 116
8056930	9.56e-07	6.04e-08	-6.52996	7.89178	-0.465362	ATP5G3	ATP synthase, H+ transporting, mitochondrial Fo complex subunit C3 (subunit 9)
8007250	9.61e-07	6.07e-08	-6.52821	7.88597	-0.527734	NAGLU	N-acetyl-alpha-glucosaminidase
8160213	9.84e-07	6.22e-08	-6.52092	7.86172	-1.04728	TTC39B	tetratricopeptide repeat domain 39B
8042086	9.9e-07	6.26e-08	6.51902	7.85543	0.423621	VRK2	vaccinia related kinase 2
7907310	9.95e-07	6.3e-08	6.51727	7.8496	0.454825	PRRC2C	proline rich coiled-coil 2C
7983145	1e-06	6.34e-08	6.51546	7.84357	0.811254	STARD9	StAR related lipid transfer domain containing 9
8143575	1.01e-06	6.42e-08	-6.5114	7.83008	-0.576123	EPHA1	EPH receptor A1
7915902	1.02e-06	6.44e-08	-6.51064	7.82755	-4.06139	CYP4A11	cytochrome P450 family 4 subfamily A member 11
7899101	1.02e-06	6.44e-08	-6.5106	7.82742	-0.623401	CNKSR1	connector enhancer of kinase suppressor of Ras 1
8073522	1.02e-06	6.46e-08	-6.50959	7.82407	-0.665591	SREBF2	sterol regulatory element binding transcription factor 2
8013450	1.02e-06	6.48e-08	6.50906	7.82231	1.30001	LGALS9C///LGALS9B///LGALS9	galectin 9C///galectin 9B///galectin 9
8039923	1.02e-06	6.49e-08	-6.50849	7.8204	-0.513169	AURKAIP1	aurora kinase A interacting protein 1
7906330	1.02e-06	6.51e-08	6.50734	7.81657	0.679913	CD1D	CD1d molecule
8077103	1.02e-06	6.52e-08	6.50719	7.81608	1.13617	TYMP	thymidine phosphorylase
7927550	1.03e-06	6.56e-08	6.50526	7.80966	0.517422	PARGP1	poly(ADP-ribose) glycohydrolase pseudogene 1
8030782	1.04e-06	6.61e-08	6.50297	7.80204	0.98068	SIGLEC9	sialic acid binding Ig like lectin 9
7916219	1.04e-06	6.64e-08	-6.50166	7.79769	-0.732547	COA7	cytochrome c oxidase assembly factor 7 (putative)
8165648	1.04e-06	6.64e-08	-6.5015	7.79716	-1.09008	MPLKIP	M-phase specific PLK1 interacting protein
7997593	1.04e-06	6.65e-08	-6.50114	7.79596	-0.541016	ATP2C2	ATPase secretory pathway Ca2+ transporting 2
8086706	1.05e-06	6.68e-08	-6.49981	7.79154	-0.44262	SETD2	SET domain containing 2
8095080	1.05e-06	6.69e-08	-6.49924	7.78965	-2.2661	PDGFRA	platelet derived growth factor receptor alpha
7989924	1.05e-06	6.69e-08	-6.49915	7.78933	-0.446848	SNAPC5	small nuclear RNA activating complex polypeptide 5
8043945	1.05e-06	6.7e-08	6.49909	7.78915	1.11516	MAP4K4	mitogen-activated protein kinase kinase kinase kinase 4
7944262	1.05e-06	6.72e-08	6.49784	7.78498	0.749384	KMT2A	lysine methyltransferase 2A
7903854	1.06e-06	6.78e-08	-6.49517	7.77612	-0.644343	SLC6A17	solute carrier family 6 member 17
8180328	1.07e-06	6.83e-08	6.49331	7.76992	0.448097	BAGE2	B melanoma antigen family member 2
7991367	1.07e-06	6.83e-08	-6.49311	7.76925	-0.476184	C15orf38-AP3S2///ARPIN	C15orf38-AP3S2 readthrough///actin-related protein 2/3 complex inhibitor
7911619	1.07e-06	6.88e-08	6.4909	7.76191	0.38219	GNB1	G protein subunit beta 1
7984779	1.07e-06	6.9e-08	6.49028	7.75987	0.903212	PML	promyelocytic leukemia
8087739	1.08e-06	6.94e-08	-6.48855	7.75409	-0.975078	CISH	cytokine inducible SH2 containing protein
8016139	1.08e-06	6.96e-08	6.48773	7.75138	0.507973	KIF18B	kinesin family member 18B
7961230	1.1e-06	7.1e-08	6.48164	7.73113	0.940916	YBX3	Y-box binding protein 3
7991374	1.11e-06	7.12e-08	-6.4807	7.728	-1.16254	IDH2	isocitrate dehydrogenase (NADP(+)) 2, mitochondrial
8037071	1.11e-06	7.14e-08	-6.48018	7.72628	-0.445377	RABAC1	Rab acceptor 1
8075276	1.11e-06	7.14e-08	-6.48007	7.7259	-0.42194	ZMAT5	zinc finger matrin-type 5
8011850	1.11e-06	7.16e-08	-6.4791	7.72267	-0.647564	C1QBP	complement C1q binding protein
7978956	1.11e-06	7.18e-08	-6.47829	7.71999	-0.939182	L2HGDH	L-2-hydroxyglutarate dehydrogenase
7972932	1.11e-06	7.18e-08	6.47827	7.71993	1.10519	GAS6-AS1///GAS6-AS1	GAS6 antisense RNA 1///GAS6 antisense RNA 1
8099121	1.11e-06	7.18e-08	-6.47822	7.71976	-0.591452	STX18	syntaxin 18
7969596	1.12e-06	7.21e-08	-6.47726	7.71656	-0.484555	GPC5	glypican 5
7965264	1.12e-06	7.21e-08	6.47705	7.71586	0.576364	CEP290	centrosomal protein 290
7925792	1.12e-06	7.22e-08	-6.4765	7.71405	-0.394093	ZMYND11	zinc finger MYND-type containing 11
8070988	1.12e-06	7.23e-08	6.4763	7.71336	0.494831	MCM3AP	minichromosome maintenance complex component 3 associated protein
7951535	1.13e-06	7.32e-08	6.47254	7.70087	0.851694	KDELC2	KDEL motif containing 2
8086467	1.13e-06	7.32e-08	-6.4725	7.70074	-0.825187	ANO10	anoctamin 10
7946340	1.13e-06	7.33e-08	-6.47205	7.69923	-1.12534	RIC3	RIC3 acetylcholine receptor chaperone
8096004	1.13e-06	7.34e-08	6.47172	7.69814	0.821979	BMP2K	BMP2 inducible kinase
8045736	1.13e-06	7.35e-08	6.47144	7.69721	0.806699	FMNL2	formin like 2
8124134	1.15e-06	7.45e-08	-6.46724	7.68324	-1.22258	TPMT	thiopurine S-methyltransferase
7988990	1.15e-06	7.48e-08	-6.46616	7.67964	-2.75577	WDR72	WD repeat domain 72
8175642	1.15e-06	7.49e-08	-6.46591	7.67884	-0.665676	CXorf40B	chromosome X open reading frame 40B
8098916	1.15e-06	7.51e-08	-6.46494	7.67561	-0.580377	TMEM129	transmembrane protein 129
8180407	1.16e-06	7.54e-08	6.46373	7.67157	0.732895	NPM1	nucleophosmin
8064967	1.16e-06	7.55e-08	-6.46332	7.67023	-0.555224	MKKS	McKusick-Kaufman syndrome
8074274	1.16e-06	7.56e-08	6.46309	7.66946	0.729392	MICAL3	microtubule associated monooxygenase, calponin and LIM domain containing 3
8097480	1.16e-06	7.58e-08	6.46218	7.66642	0.67753	NAA15	N(alpha)-acetyltransferase 15, NatA auxiliary subunit
8064790	1.16e-06	7.59e-08	6.46164	7.66464	1.65734	RASSF2	Ras association domain family member 2
7973446	1.17e-06	7.6e-08	-6.46134	7.66364	-0.380219	DHRS4-AS1	DHRS4 antisense RNA 1
7939657	1.17e-06	7.65e-08	6.45934	7.65698	0.456222	DGKZ	diacylglycerol kinase zeta
7955078	1.17e-06	7.65e-08	-6.4593	7.65686	-0.849801	PFKM	phosphofructokinase, muscle
8102587	1.18e-06	7.72e-08	-6.45682	7.64862	-3.57234	NDNF	neuron derived neurotrophic factor
8103695	1.19e-06	7.77e-08	-6.45498	7.64248	-1.15773	MFAP3L	microfibrillar associated protein 3 like
8064591	1.19e-06	7.77e-08	-6.4548	7.64189	-0.361381	LZTS3	leucine zipper tumor suppressor family member 3
8018428	1.19e-06	7.8e-08	-6.45358	7.63782	-0.793041	GALK1	galactokinase 1
7981972	1.2e-06	7.83e-08	-6.45268	7.63485	-0.442025	SNORD116-12	small nucleolar RNA, C/D box 116-12
8031223	1.2e-06	7.89e-08	6.45023	7.62669	1.14826	LILRB1	leukocyte immunoglobulin like receptor B1
8155234	1.2e-06	7.9e-08	6.44991	7.62564	0.547947	ZCCHC7	zinc finger CCHC-type containing 7
7905088	1.2e-06	7.9e-08	-6.44986	7.62546	-0.869924	HIST2H2AC	histone cluster 2, H2ac
7985493	1.22e-06	7.97e-08	6.4471	7.61629	1.61713	TM6SF1	transmembrane 6 superfamily member 1
8088535	1.22e-06	8.01e-08	-6.44591	7.61232	-0.499509	PSMD6	proteasome 26S subunit, non-ATPase 6
7955376	1.24e-06	8.11e-08	6.44193	7.59909	0.43372	DIP2B	disco interacting protein 2 homolog B
8145365	1.25e-06	8.22e-08	6.43805	7.58621	0.897816	DOCK5	dedicator of cytokinesis 5
8130163	1.25e-06	8.22e-08	6.43793	7.58581	0.396332	RAET1G	retinoic acid early transcript 1G
8065920	1.25e-06	8.23e-08	6.43775	7.58521	0.990312	FER1L4	fer-1 like family member 4, pseudogene
7952249	1.26e-06	8.28e-08	-6.43598	7.57933	-2.36347	USP2	ubiquitin specific peptidase 2
7936041	1.26e-06	8.31e-08	-6.4347	7.57506	-0.357777	ARL3	ADP ribosylation factor like GTPase 3
7954711	1.26e-06	8.32e-08	6.43463	7.57484	0.835516	KIAA1551	KIAA1551
8051746	1.27e-06	8.37e-08	6.43251	7.56777	0.539112	THUMPD2	THUMP domain containing 2
8044882	1.27e-06	8.4e-08	-6.43169	7.56506	-1.11691	EPB41L5	erythrocyte membrane protein band 4.1 like 5
8133914	1.28e-06	8.41e-08	6.43114	7.56322	0.537382	DMTF1	cyclin D binding myb like transcription factor 1
8175871	1.28e-06	8.44e-08	-6.43037	7.56065	-1.45567	L1CAM	L1 cell adhesion molecule
8164177	1.28e-06	8.44e-08	-6.43006	7.55964	-0.576419	MAPKAP1	mitogen-activated protein kinase associated protein 1
7937135	1.28e-06	8.46e-08	-6.42936	7.55731	-0.618061	CFAP46	cilia and flagella associated protein 46
8087790	1.3e-06	8.6e-08	-6.4245	7.54115	-0.318	RRP9	ribosomal RNA processing 9, small subunit (SSU) processome component, homolog (yeast)
8131614	1.3e-06	8.62e-08	6.42396	7.53935	1.05284	AHR	aryl hydrocarbon receptor
7987097	1.3e-06	8.63e-08	6.42371	7.53852	0.528421	MIR211	microRNA 211
7981181	1.32e-06	8.76e-08	-6.41903	7.52298	-0.949989	SCARNA13///SNHG10	small Cajal body-specific RNA 13///small nucleolar RNA host gene 10
8045768	1.33e-06	8.8e-08	6.41777	7.51878	0.639667	ARL6IP6	ADP ribosylation factor like GTPase 6 interacting protein 6
7929768	1.33e-06	8.81e-08	6.4173	7.51722	0.578785	CUTC	cutC copper transporter
7999160	1.33e-06	8.83e-08	-6.41663	7.515	-0.443018	CDIP1	cell death inducing p53 target 1
8147206	1.34e-06	8.89e-08	6.41464	7.50839	0.857316	RIPK2	receptor interacting serine/threonine kinase 2
8160040	1.34e-06	8.9e-08	-6.41458	7.50815	-2.36385	PTPRD	protein tyrosine phosphatase, receptor type D
7959386	1.34e-06	8.9e-08	-6.41449	7.50786	-0.387615	LRRC43	leucine rich repeat containing 43
8074432	1.34e-06	8.92e-08	-6.41376	7.50545	-0.601602	HIRA	histone cell cycle regulator
8019250	1.35e-06	8.98e-08	6.41179	7.49889	0.748822	P4HB	prolyl 4-hydroxylase subunit beta
8115978	1.35e-06	9.02e-08	6.41058	7.49486	0.61957	UIMC1	ubiquitin interaction motif containing 1
8006850	1.36e-06	9.03e-08	6.40995	7.49276	0.365745	CDK12	cyclin dependent kinase 12
8174103	1.36e-06	9.08e-08	-6.4083	7.48728	-1.76061	GK3P///GK	glycerol kinase 3 pseudogene///glycerol kinase
8133662	1.37e-06	9.12e-08	-6.40725	7.48381	-0.874571	RHBDD2	rhomboid domain containing 2
8037103	1.37e-06	9.12e-08	-6.40722	7.48369	-0.720154	GRIK5	glutamate ionotropic receptor kainate type subunit 5
7924150	1.37e-06	9.13e-08	-6.40697	7.48287	-0.801424	TMEM206	transmembrane protein 206
7959751	1.37e-06	9.13e-08	-6.40697	7.48286	-0.409962	ZNF664-FAM101A///ZNF664	filamin-interacting protein FAM101A///zinc finger protein 664
8030866	1.37e-06	9.17e-08	6.40548	7.47793	1.8113	FPR3	formyl peptide receptor 3
8099967	1.38e-06	9.21e-08	-6.4042	7.47365	-0.842055	RBM47	RNA binding motif protein 47
7977786	1.39e-06	9.29e-08	-6.40173	7.46544	-2.33332	SLC7A7	solute carrier family 7 member 7
7946680	1.39e-06	9.3e-08	6.40141	7.46437	0.620808	BTBD10	BTB domain containing 10
8066074	1.39e-06	9.3e-08	6.40136	7.46423	0.707973	DSN1	DSN1 homolog, MIS12 kinetochore complex component
7907146	1.4e-06	9.36e-08	6.39948	7.45796	0.66014	TBX19	T-box 19
8100292	1.4e-06	9.37e-08	6.39925	7.4572	0.705052	FRYL	FRY like transcription coactivator
8103188	1.4e-06	9.38e-08	-6.39878	7.45564	-0.5922	GATB	glutamyl-tRNA amidotransferase subunit B
8073775	1.42e-06	9.5e-08	-6.39501	7.44312	-1.50873	FBLN1	fibulin 1
8149849	1.42e-06	9.51e-08	6.39459	7.44172	0.499738	GNRH1	gonadotropin releasing hormone 1
8158147	1.42e-06	9.52e-08	-6.39423	7.44051	-1.29148	SLC25A25	solute carrier family 25 member 25
8028172	1.42e-06	9.56e-08	-6.393	7.43642	-0.66453	CAPNS1	calpain small subunit 1
7950683	1.42e-06	9.58e-08	-6.39263	7.43518	-0.631839	NARS2	asparaginyl-tRNA synthetase 2, mitochondrial (putative)
8145532	1.43e-06	9.66e-08	-6.39018	7.42705	-2.20359	EPHX2	epoxide hydrolase 2
8108981	1.44e-06	9.67e-08	-6.38957	7.42503	-1.27451	STK32A	serine/threonine kinase 32A
8116664	1.44e-06	9.68e-08	6.3895	7.42481	0.417397	PRPF4B	pre-mRNA processing factor 4B
8005171	1.45e-06	9.79e-08	6.386	7.41315	0.691617	TRPV2	transient receptor potential cation channel subfamily V member 2
8102610	1.45e-06	9.81e-08	6.38559	7.4118	2.506	QRFPR	pyroglutamylated RFamide peptide receptor
8063156	1.45e-06	9.81e-08	6.38543	7.41126	0.883332	CD40	CD40 molecule
7944164	1.46e-06	9.83e-08	-6.3849	7.40949	-2.04974	TMPRSS4	transmembrane protease, serine 4
8003824	1.46e-06	9.85e-08	-6.38425	7.40733	-0.780784	CTNS	cystinosin, lysosomal cystine transporter
8098848	1.47e-06	9.93e-08	-6.38176	7.39907	-0.766907	SLC26A1	solute carrier family 26 member 1
8173812	1.47e-06	9.96e-08	-6.38087	7.39611	-0.541324	HMGN5	high mobility group nucleosome binding domain 5
7898805	1.48e-06	9.99e-08	6.38002	7.39328	1.92272	C1QB	complement C1q B chain
8078784	1.49e-06	1.01e-07	-6.37659	7.38188	-1.78301	XYLB	xylulokinase
8136401	1.49e-06	1.01e-07	6.37646	7.38145	0.561335	NUP205	nucleoporin 205
8091991	1.49e-06	1.01e-07	-6.37601	7.37994	-1.02678	MECOM	MDS1 and EVI1 complex locus
8157761	1.49e-06	1.01e-07	6.37569	7.37888	1.16527	NEK6	NIMA related kinase 6
8086729	1.5e-06	1.02e-07	-6.37427	7.37415	-0.32638	KIF9	kinesin family member 9
8137542	1.5e-06	1.02e-07	6.37399	7.37322	0.468554	RBM33	RNA binding motif protein 33
8060758	1.51e-06	1.02e-07	-6.37247	7.36817	-0.883696	PRNP	prion protein
8142585	1.51e-06	1.03e-07	-6.37171	7.36565	-0.776206	CADPS2	calcium dependent secretion activator 2
8097521	1.51e-06	1.03e-07	-6.37097	7.3632	-0.612172	SCOC	short coiled-coil protein
7973797	1.52e-06	1.03e-07	-6.37019	7.36059	-0.596737	COCH	cochlin
8004360	1.52e-06	1.03e-07	6.36963	7.35875	0.863061	KCTD11	potassium channel tetramerization domain containing 11
7995739	1.52e-06	1.04e-07	-6.36925	7.35748	-0.371268	GNAO1	G protein subunit alpha o1
8079746	1.52e-06	1.04e-07	-6.36906	7.35683	-0.916774	TCTA	T-cell leukemia translocation altered
8110055	1.52e-06	1.04e-07	-6.36846	7.35486	-0.923452	CPEB4	cytoplasmic polyadenylation element binding protein 4
7947934	1.53e-06	1.05e-07	-6.36638	7.34795	-0.833262	MTCH2	mitochondrial carrier 2
8070786	1.53e-06	1.05e-07	6.36624	7.34747	0.388666	KRTAP10-12///KRTAP10-3///KRTAP10-2///KRTAP10-11///KRTAP10-1///KRTAP10-9///KRTAP10-7///KRTAP10-6///KRTAP10-4///KRTAP10-10	keratin associated protein 10-12///keratin associated protein 10-3///keratin associated protein 10-2///keratin associated protein 10-11///keratin associated protein 10-1///keratin associated protein 10-9///keratin associated protein 10-7///keratin associated protein 10-6///keratin associated protein 10-4///keratin associated protein 10-10
8117194	1.53e-06	1.05e-07	-6.36607	7.34691	-0.68459	MRS2	MRS2, magnesium transporter
7953395	1.54e-06	1.06e-07	-6.36376	7.33921	-0.705499	COPS7A	COP9 signalosome subunit 7A
8176219	1.54e-06	1.06e-07	6.36354	7.33849	1.44069	CMC4///MTCP1	C-X9-C motif containing 4///mature T-cell proliferation 1
8151101	1.54e-06	1.06e-07	6.36266	7.33556	1.48618	MYBL1	MYB proto-oncogene like 1
8158544	1.55e-06	1.06e-07	-6.36215	7.33389	-0.445409	NTMT1	N-terminal Xaa-Pro-Lys N-methyltransferase 1
8019831	1.57e-06	1.08e-07	-6.35638	7.3147	-0.642576	CLUL1	clusterin like 1
7974473	1.57e-06	1.08e-07	-6.35637	7.31468	-0.729554	FBXO34	F-box protein 34
7961291	1.58e-06	1.09e-07	6.35539	7.3114	0.869578	TAS2R31	taste 2 receptor member 31
8142697	1.58e-06	1.09e-07	6.35395	7.30661	0.684834	POT1	protection of telomeres 1
7938035	1.59e-06	1.09e-07	6.35367	7.30568	1.30723	TRIM22	tripartite motif containing 22
7956949	1.59e-06	1.09e-07	6.35303	7.30357	0.607056	NUP107	nucleoporin 107
7909104	1.59e-06	1.09e-07	6.3528	7.30278	1.43782	CDK18	cyclin dependent kinase 18
8138745	1.6e-06	1.1e-07	-6.35057	7.29539	-1.23696	HOXA7	homeobox A7
8122099	1.61e-06	1.11e-07	-6.34818	7.28742	-2.04153	ENPP1	ectonucleotide pyrophosphatase/phosphodiesterase 1
8093578	1.62e-06	1.12e-07	-6.34633	7.28128	-0.482501	NAT8L	N-acetyltransferase 8 like
7906128	1.64e-06	1.13e-07	-6.34343	7.27164	-1.04262	SLC25A44	solute carrier family 25 member 44
7985829	1.65e-06	1.14e-07	6.3401	7.26058	1.3156	FANCI	Fanconi anemia complementation group I
7998784	1.66e-06	1.15e-07	6.33813	7.25404	0.952089	ABCA3	ATP binding cassette subfamily A member 3
[truncated: 20,196 more rows]
