# Supplementary material for: Prediction and analysis of novel key genes ITGAX, LAPTM5, SERPINE1 in clear cell renal cell carcinoma through bioinformatics analysis
Source: PeerJ. 2021 Apr 20;9:e11272. doi: 10.7717/peerj.11272 (PMC8063882; doi:10.7717/peerj.11272)
Supplement: Supplemental Information 9 — There were 3,627 upregulated genes and 5,170 downregulated genes among the 8797 DEGs screened from the GSE66272 dataset. [file peerj-09-11272-s009.xlsx]

## Sheet: Sheet1
ID	adj.P.Val	P.Value	t	B	logFC	abs logFC	Gene.symbol	Gene.title
221298_s_at	2.73e-16	8e-19	-13.5705	32.6161	-7.37593	7.37593	SLC22A8	solute carrier family 22 member 8
218484_at	1.43e-12	2.75e-14	10.3452	22.2887	7.31457	7.31457	NDUFA4L2	NDUFA4, mitochondrial complex associated like 2
206054_at	1.64e-16	4.14e-19	-13.7888	33.2655	-7.30927	7.30927	KNG1	kininogen 1
205244_s_at	3.88e-16	1.27e-18	-13.4176	32.1577	-7.03989	7.03989	SLC13A3	solute carrier family 13 member 3
205892_s_at	3.47e-15	2.02e-17	-12.5284	29.4296	-7.03435	7.03435	FABP1	fatty acid binding protein 1
205625_s_at	7.68e-16	3.26e-18	-13.1117	31.2309	-6.9122	6.9122	CALB1	calbindin 1
220424_at	1.93e-14	1.67e-16	-11.87	27.3417	-6.79328	6.79328	NPHS2	NPHS2, podocin
205626_s_at	1.16e-15	5.21e-18	-12.9605	30.7684	-6.74007	6.74007	CALB1	calbindin 1
210403_s_at	4.79e-15	2.97e-17	-12.407	29.0488	-6.70836	6.70836	KCNJ1	potassium voltage-gated channel subfamily J member 1
210402_at	2.67e-16	7.78e-19	-13.5799	32.6441	-6.65121	6.65121	KCNJ1	potassium voltage-gated channel subfamily J member 1
209978_s_at	3.71e-17	5.56e-20	-14.4665	35.2415	-6.56451	6.56451	PLG///LPA	plasminogen///lipoprotein(a)
204704_s_at	9.2e-15	6.61e-17	-12.1567	28.2581	-6.50135	6.50135	ALDOB	aldolase, fructose-bisphosphate B
206024_at	1.22e-13	1.56e-15	-11.1916	25.1306	-6.47474	6.47474	HPD	4-hydroxyphenylpyruvate dioxygenase
205985_x_at	1.78e-18	5.2e-22	-16.1227	39.8258	-6.44824	6.44824	CLCNKB	chloride voltage-gated channel Kb
214598_at	3.47e-16	1.08e-18	-13.4721	32.3214	-6.30428	6.30428	CLDN8	claudin 8
208354_s_at	1.56e-18	3.6e-22	-16.2579	40.185	-6.23353	6.23353	SLC12A3	solute carrier family 12 member 3
231352_at	5.01e-17	7.97e-20	-14.3436	34.8877	-6.22991	6.22991	SLC22A8	solute carrier family 22 member 8
206484_s_at	2.33e-17	3.07e-20	-14.6705	35.8247	-6.18589	6.18589	XPNPEP2	X-prolyl aminopeptidase 2
211298_s_at	2.39e-16	6.7e-19	-13.6294	32.7919	-6.15964	6.15964	ALB	albumin
205243_at	2.13e-16	5.57e-19	-13.6904	32.9735	-6.05269	6.05269	SLC13A3	solute carrier family 13 member 3
206716_at	1.39e-13	1.83e-15	-11.1435	24.9713	-6.03358	6.03358	UMOD	uromodulin
209977_at	1.46e-16	3.41e-19	-13.8535	33.4565	-5.96066	5.96066	PLG	plasminogen
204416_x_at	4.59e-18	2.23e-21	15.5936	38.3981	5.95611	5.95611	APOC1	apolipoprotein C1
233183_at	3.71e-18	1.63e-21	-15.7069	38.7066	-5.94424	5.94424	SLC4A9	solute carrier family 4 member 9
243562_at	3.45e-15	2e-17	-12.5315	29.4392	-5.88411	5.88411	KNG1	kininogen 1
231058_at	6.68e-15	4.38e-17	-12.285	28.6644	-5.87523	5.87523	FXYD4	FXYD domain containing ion transport regulator 4
213479_at	5.23e-11	1.69e-12	9.17017	18.2033	5.8633	5.8633	NPTX2	neuronal pentraxin 2
206025_s_at	3.21e-15	1.83e-17	12.5601	29.5286	5.84042	5.84042	TNFAIP6	TNF alpha induced protein 6
240183_at	6.38e-17	1.18e-19	-14.2104	34.5018	-5.81938	5.81938	TMEM213	transmembrane protein 213
217512_at	1.37e-16	3.13e-19	-13.8822	33.5412	-5.81716	5.81716	KNG1	kininogen 1
216599_x_at	3.75e-13	5.82e-15	-10.7998	23.8263	-5.80722	5.80722	SLC22A6	solute carrier family 22 member 6
231391_at	1.55e-11	4.32e-13	-9.55526	19.5588	-5.784	5.784	CTXN3	cortexin 3
213967_at	6.4e-18	4.12e-21	-15.3744	37.7966	-5.76791	5.76791	RALYL	RALY RNA binding protein-like
210165_at	1.56e-18	4.12e-22	-16.2084	40.0537	-5.75943	5.75943	DNASE1	deoxyribonuclease 1
206457_s_at	1.3e-18	2.24e-22	-16.4339	40.6499	-5.73266	5.73266	DIO1	deiodinase, iodothyronine type I
223333_s_at	1.08e-12	1.96e-14	10.4432	22.6222	5.68598	5.68598	ANGPTL4	angiopoietin like 4
206952_at	1.92e-11	5.51e-13	-9.48647	19.3178	-5.6777	5.6777	G6PC	glucose-6-phosphatase catalytic subunit
220281_at	1.93e-13	2.67e-15	-11.0315	24.6	-5.66101	5.66101	SLC12A1	solute carrier family 12 member 1
216910_at	7.71e-18	5.78e-21	-15.2546	37.4654	-5.64752	5.64752	XPNPEP2	X-prolyl aminopeptidase 2
220197_at	6.28e-18	3.77e-21	-15.4059	37.8834	-5.6459	5.6459	ATP6V0A4	ATPase H+ transporting V0 subunit a4
227238_at	4.98e-15	3.11e-17	-12.3931	29.0051	-5.61043	5.61043	MUC15	mucin 15, cell surface associated
1559992_a_at	4.44e-16	1.49e-18	-13.3654	32.0004	-5.60352	5.60352	LINC00645	long intergenic non-protein coding RNA 645
1554748_at	7.57e-16	3.17e-18	-13.1209	31.259	-5.60051	5.60051	CLCNKB	chloride voltage-gated channel Kb
1554668_a_at	3.47e-14	3.45e-16	-11.6475	26.6231	-5.57644	5.57644	FAM151A	family with sequence similarity 151 member A
231634_at	6.74e-15	4.45e-17	-12.2804	28.6499	-5.50217	5.50217	SLC12A3	solute carrier family 12 member 3
239006_at	2.31e-16	6.28e-19	-13.6503	32.8543	-5.48585	5.48585	SLC26A7	solute carrier family 26 member 7
205549_at	3.42e-15	1.97e-17	-12.5367	29.4555	-5.47829	5.47829	PCP4	Purkinje cell protein 4
223869_at	9.07e-13	1.61e-14	-10.5011	22.8189	-5.47027	5.47027	SOST	sclerostin
206404_at	4.02e-15	2.37e-17	-12.4776	29.2706	-5.46451	5.46451	FGF9	fibroblast growth factor 9
205029_s_at	4.26e-06	5.97e-07	5.67826	5.58227	5.45341	5.45341	FABP7	fatty acid binding protein 7
241436_at	1.08e-11	2.81e-13	-9.67684	19.9835	-5.44751	5.44751	SCNN1G	sodium channel epithelial 1 gamma subunit
206026_s_at	2.38e-15	1.22e-17	12.6875	29.9255	5.42321	5.42321	TNFAIP6	TNF alpha induced protein 6
217078_s_at	1.08e-20	3.95e-25	18.9123	46.8198	5.40472	5.40472	CD300A	CD300a molecule
205983_at	2.88e-15	1.59e-17	-12.6036	29.6644	-5.40098	5.40098	DPEP1	dipeptidase 1 (renal)
206754_s_at	4.23e-15	2.54e-17	-12.4566	29.2046	-5.39012	5.39012	CYP2B7P///CYP2B6	cytochrome P450 family 2 subfamily B member 7, pseudogene///cytochrome P450 family 2 subfamily B member 6
202934_at	4.59e-18	2.29e-21	15.584	38.3718	5.36425	5.36425	HK2	hexokinase 2
238287_at	1.25e-11	3.34e-13	-9.62777	19.8123	-5.35153	5.35153	SLC7A13	solute carrier family 7 member 13
210199_at	2.39e-16	6.73e-19	-13.6276	32.7866	-5.34822	5.34822	CRYAA	crystallin alpha A
231068_at	6.61e-15	4.33e-17	-12.2888	28.6765	-5.33051	5.33051	SLC47A2	solute carrier family 47 member 2
211689_s_at	2.23e-16	6e-19	-13.6655	32.8994	-5.30158	5.30158	TMPRSS2	transmembrane protease, serine 2
239593_at	1.07e-17	9.4e-21	-15.0831	36.9883	-5.27703	5.27703	TMEM213	transmembrane protein 213
214053_at	2.62e-16	7.51e-19	-13.5915	32.6788	-5.27634	5.27634	ERBB4	erb-b2 receptor tyrosine kinase 4
228375_at	1.88e-14	1.61e-16	-11.882	27.3804	-5.26011	5.26011	IGSF11	immunoglobulin superfamily member 11
217238_s_at	6.56e-13	1.11e-14	-10.6109	23.1904	-5.24985	5.24985	ALDOB	aldolase, fructose-bisphosphate B
226553_at	1.3e-18	2.16e-22	-16.4461	40.6819	-5.24728	5.24728	TMPRSS2	transmembrane protease, serine 2
202036_s_at	4.36e-14	4.57e-16	-11.5621	26.3455	-5.2424	5.2424	SFRP1	secreted frizzled related protein 1
205336_at	1.34e-16	3.02e-19	-13.8943	33.5769	-5.23852	5.23852	PVALB	parvalbumin
229916_at	1.3e-18	1.03e-22	-16.7257	41.4119	-5.23578	5.23578	ENPP6	ectonucleotide pyrophosphatase/phosphodiesterase 6
210343_s_at	7.1e-13	1.21e-14	-10.5845	23.1012	-5.23147	5.23147	SLC22A6	solute carrier family 22 member 6
227241_at	9.32e-14	1.13e-15	-11.2888	25.4511	-5.23136	5.23136	MUC15	mucin 15, cell surface associated
231398_at	5.32e-16	1.95e-18	-13.2781	31.7365	-5.22764	5.22764	SLC22A7	solute carrier family 22 member 7
205751_at	5.82e-13	9.64e-15	-10.6512	23.3265	-5.21327	5.21327	SH3GL2	SH3 domain containing GRB2 like 2, endophilin A1
206840_at	7.05e-16	2.9e-18	-13.1495	31.3462	-5.19959	5.19959	AFM	afamin
231376_at	3.2e-16	9.84e-19	-13.5024	32.4124	-5.18084	5.18084	UPP2	uridine phosphorylase 2
230931_at	2.04e-17	2.49e-20	-14.7426	36.0296	-5.17176	5.17176	PLG	plasminogen
205694_at	3.8e-15	2.23e-17	-12.4971	29.3316	-5.15535	5.15535	TYRP1	tyrosinase related protein 1
1554195_a_at	1.3e-09	6.67e-11	8.15401	14.5629	5.15393	5.15393	C5orf46	chromosome 5 open reading frame 46
223704_s_at	6.53e-17	1.22e-19	-14.1992	34.4693	-5.14965	5.14965	DMRT2	doublesex and mab-3 related transcription factor 2
236630_at	6.94e-18	4.95e-21	-15.3093	37.6169	-5.14509	5.14509	AQP2	aquaporin 2
216834_at	3.33e-15	1.9e-17	12.5476	29.4896	5.14466	5.14466	RGS1	regulator of G-protein signaling 1
229529_at	1.24e-16	2.72e-19	-13.9296	33.6808	-5.12263	5.12263	TCF21	transcription factor 21
242517_at	5.53e-13	9.09e-15	10.6687	23.3855	5.11712	5.11712	KISS1R	KISS1 receptor
227642_at	1.23e-17	1.26e-20	-14.9817	36.7042	-5.11145	5.11145	TFCP2L1	transcription factor CP2-like 1
1565228_s_at	4.27e-14	4.45e-16	-11.5705	26.373	-5.10445	5.10445	ALB	albumin
1552767_a_at	6.21e-17	1.11e-19	-14.2298	34.558	-5.08283	5.08283	HS6ST2	heparan sulfate 6-O-sulfotransferase 2
230030_at	1.17e-16	2.48e-19	-13.96	33.7702	-5.076	5.076	HS6ST2	heparan sulfate 6-O-sulfotransferase 2
239805_at	1.81e-16	4.68e-19	-13.7481	33.1449	-5.07467	5.07467	SLC13A2	solute carrier family 13 member 2
206226_at	4.78e-16	1.65e-18	-13.3323	31.9006	-5.07312	5.07312	HRG	histidine rich glycoprotein
210452_x_at	1.09e-14	8.27e-17	-12.0871	28.0367	-5.05675	5.05675	CYP4F2	cytochrome P450 family 4 subfamily F member 2
202037_s_at	2.42e-15	1.25e-17	-12.6797	29.9012	-5.03184	5.03184	SFRP1	secreted frizzled related protein 1
214451_at	4.97e-16	1.75e-18	-13.3146	31.847	-5.02274	5.02274	TFAP2B	transcription factor AP-2 beta
205117_at	5.78e-12	1.36e-13	-9.88334	20.7012	-5.02192	5.02192	FGF1	fibroblast growth factor 1
236646_at	2.29e-17	2.89e-20	-14.6914	35.8842	-4.99584	4.99584	TMEM52B	transmembrane protein 52B
209443_at	4.65e-15	2.86e-17	-12.419	29.0867	-4.9943	4.9943	SERPINA5	serpin family A member 5
205719_s_at	3.03e-11	9.23e-13	-9.34073	18.8056	-4.98981	4.98981	LOC101929036///PAH	uncharacterized LOC101929036///phenylalanine hydroxylase
228581_at	6.31e-15	4.09e-17	-12.3064	28.7321	-4.98623	4.98623	KCNJ10	potassium voltage-gated channel subfamily J member 10
204705_x_at	1.7e-12	3.33e-14	-10.2892	22.0975	-4.98491	4.98491	ALDOB	aldolase, fructose-bisphosphate B
213317_at	1.05e-12	1.9e-14	-10.4527	22.6546	-4.97682	4.97682	CLIC5	chloride intracellular channel 5
206089_at	3.52e-14	3.53e-16	-11.6405	26.6004	-4.9759	4.9759	NELL1	neural EGFL like 1
219554_at	5.17e-17	8.54e-20	-14.3202	34.82	-4.89121	4.89121	RHCG	Rh family C glycoprotein
236374_at	5.41e-12	1.27e-13	-9.90478	20.7755	-4.88694	4.88694	CTXN3	cortexin 3
230687_at	1.57e-15	7.46e-18	-12.8452	30.4135	-4.88644	4.88644	SLC13A3	solute carrier family 13 member 3
218186_at	1.91e-14	1.65e-16	-11.8733	27.3524	-4.88189	4.88189	RAB25	RAB25, member RAS oncogene family
209904_at	6.45e-16	2.55e-18	-13.1914	31.4735	-4.87936	4.87936	TNNC1	troponin C1, slow skeletal and cardiac type
205030_at	9.15e-07	1.06e-07	6.15116	7.27612	4.8735	4.8735	FABP7	fatty acid binding protein 7
202238_s_at	2.84e-18	1.04e-21	15.8699	39.1479	4.85434	4.85434	LOC101928916///NNMT	uncharacterized LOC101928916///nicotinamide N-methyltransferase
221870_at	7.62e-18	5.57e-21	15.2674	37.501	4.84438	4.84438	EHD2	EH domain containing 2
207673_at	1.1e-13	1.38e-15	-11.2286	25.2527	-4.84083	4.84083	NPHS1	NPHS1, nephrin
239132_at	9.33e-16	4.08e-18	-13.0393	31.0097	-4.83784	4.83784	NOS1	nitric oxide synthase 1
239178_at	2.28e-14	2.08e-16	-11.8032	27.1266	-4.83225	4.83225	FGF9	fibroblast growth factor 9
205592_at	6.79e-16	2.72e-18	-13.1702	31.4092	-4.82974	4.82974	SLC4A1	solute carrier family 4 member 1 (Diego blood group)
203453_at	4.02e-13	6.34e-15	-10.7748	23.7422	-4.82332	4.82332	SCNN1A	sodium channel epithelial 1 alpha subunit
236489_at	6.73e-13	1.14e-14	-10.6029	23.1634	-4.81466	4.81466	ADGRF1	adhesion G protein-coupled receptor F1
242601_at	2.37e-16	6.51e-19	-13.6385	32.819	-4.81122	4.81122	HEPACAM2	HEPACAM family member 2
210445_at	3.52e-10	1.52e-11	8.56104	16.0308	4.80873	4.80873	FABP6	fatty acid binding protein 6
234314_at	2.39e-16	6.68e-19	-13.6304	32.7948	-4.79411	4.79411	RALGAPA2	Ral GTPase activating protein catalytic alpha subunit 2
205199_at	6.6e-12	1.59e-13	9.84033	20.5521	4.77757	4.77757	CA9	carbonic anhydrase 9
229831_at	1.26e-12	2.35e-14	-10.3905	22.4432	-4.77239	4.77239	CNTN3	contactin 3
207174_at	1.89e-12	3.78e-14	-10.2526	21.9726	-4.77148	4.77148	GPC5	glypican 5
206515_at	8.93e-13	1.58e-14	-10.5064	22.8369	-4.76914	4.76914	CYP4F3	cytochrome P450 family 4 subfamily F member 3
204130_at	2.71e-13	3.95e-15	-10.9146	24.2103	-4.76567	4.76567	HSD11B2	hydroxysteroid 11-beta dehydrogenase 2
231623_at	1.84e-12	3.67e-14	-10.2611	22.0017	-4.76538	4.76538	TMEM174	transmembrane protein 174
230565_at	1.82e-17	2.14e-20	-14.7964	36.182	-4.7599	4.7599	ATP6V1G3	ATPase H+ transporting V1 subunit G3
236652_at	7.57e-16	3.19e-18	-13.1192	31.2538	-4.73993	4.73993	LOC149703	uncharacterized LOC149703
220723_s_at	3.88e-16	1.27e-18	-13.4177	32.1579	-4.73675	4.73675	CWH43	cell wall biogenesis 43 C-terminal homolog
231021_at	3.69e-15	2.16e-17	-12.5073	29.3636	-4.73299	4.73299	SLC6A19	solute carrier family 6 member 19
237799_at	1.2e-16	2.57e-19	-13.9484	33.7362	-4.707	4.707	SLC22A12	solute carrier family 22 member 12
225645_at	3.04e-12	6.58e-14	-10.0927	21.424	-4.70531	4.70531	EHF	ETS homologous factor
207249_s_at	1.35e-16	3.07e-19	-13.8887	33.5606	-4.70079	4.70079	SLC28A2	solute carrier family 28 member 2
225681_at	1.23e-14	9.54e-17	12.043	27.8959	4.69557	4.69557	CTHRC1	collagen triple helix repeat containing 1
207047_s_at	2.9e-18	1.14e-21	-15.8355	39.0551	-4.69425	4.69425	CLCNKB///CLCNKA	chloride voltage-gated channel Kb///chloride voltage-gated channel Ka
205911_at	4.05e-15	2.41e-17	-12.4733	29.257	-4.69106	4.69106	PTH1R	parathyroid hormone 1 receptor
201291_s_at	1.58e-11	4.4e-13	9.55002	19.5404	4.68762	4.68762	TOP2A	topoisomerase (DNA) II alpha
229782_at	9.1e-14	1.1e-15	-11.2979	25.4809	-4.68353	4.68353	RMST	rhabdomyosarcoma 2 associated transcript (non-protein coding)
206514_s_at	7.73e-16	3.3e-18	-13.1081	31.2201	-4.67904	4.67904	CYP4F2///CYP4F3	cytochrome P450 family 4 subfamily F member 2///cytochrome P450 family 4 subfamily F member 3
1553151_at	8.01e-14	9.35e-16	-11.3455	25.6373	-4.66355	4.66355	ATP6V0D2	ATPase H+ transporting V0 subunit d2
231070_at	2.19e-14	1.96e-16	-11.8208	27.1833	-4.65169	4.65169	IYD	iodotyrosine deiodinase
212768_s_at	2.96e-10	1.24e-11	-8.61653	16.23	-4.64831	4.64831	OLFM4	olfactomedin 4
240285_at	1.52e-13	2.05e-15	-11.1106	24.8624	-4.63408	4.63408	AQP2	aquaporin 2
229341_at	1.29e-15	5.95e-18	-12.9176	30.6366	-4.62369	4.62369	TFCP2L1	transcription factor CP2-like 1
211276_at	1.46e-16	3.37e-19	-13.8578	33.4695	-4.61463	4.61463	TCEAL2	transcription elongation factor A like 2
236360_at	3.57e-16	1.13e-18	-13.4579	32.2788	-4.61011	4.61011	LINC00982	long intergenic non-protein coding RNA 982
207771_at	4.12e-14	4.23e-16	-11.586	26.4232	-4.60721	4.60721	SLC5A2	solute carrier family 5 member 2
240033_at	7.01e-16	2.87e-18	-13.1528	31.3562	-4.60274	4.60274	PLG	plasminogen
235988_at	2.73e-15	1.47e-17	-12.6291	29.7438	-4.59916	4.59916	ADGRF1	adhesion G protein-coupled receptor F1
1554749_s_at	2.84e-18	1.02e-21	-15.8769	39.1668	-4.59091	4.59091	CLCNKB	chloride voltage-gated channel Kb
219732_at	1.3e-18	2.26e-22	-16.4294	40.6379	-4.58812	4.58812	PLPPR1	phospholipid phosphatase related 1
201313_at	1.92e-17	2.31e-20	14.7685	36.103	4.58807	4.58807	ENO2	enolase 2
214788_x_at	2.92e-13	4.33e-15	-10.8875	24.1198	-4.57146	4.57146	DDN	dendrin
236225_at	1.44e-15	6.73e-18	-12.8784	30.5159	-4.56628	4.56628	GGT6	gamma-glutamyltransferase 6
219725_at	2.32e-17	2.97e-20	14.6819	35.8571	4.55497	4.55497	TREM2	triggering receptor expressed on myeloid cells 2
220889_s_at	1.61e-14	1.32e-16	-11.9428	27.5753	-4.52733	4.52733	CA10	carbonic anhydrase 10
223550_s_at	1.47e-14	1.18e-16	-11.9771	27.6854	-4.5245	4.5245	CA10	carbonic anhydrase 10
1552721_a_at	5.63e-12	1.33e-13	-9.89093	20.7275	-4.5213	4.5213	FGF1	fibroblast growth factor 1
216223_at	6.69e-11	2.24e-12	-9.09248	17.9281	-4.51812	4.51812	CPN2	carboxypeptidase N subunit 2
237250_at	8.85e-14	1.06e-15	-11.308	25.5141	-4.51588	4.51588	GABRA2	gamma-aminobutyric acid type A receptor alpha2 subunit
205502_at	1.08e-15	4.79e-18	-12.9872	30.8502	-4.50363	4.50363	CYP17A1	cytochrome P450 family 17 subfamily A member 1
231217_at	2.12e-14	1.89e-16	-11.8323	27.2203	-4.48501	4.48501	SLC13A3	solute carrier family 13 member 3
208177_at	6.54e-17	1.24e-19	-14.194	34.4542	-4.47016	4.47016	SLC34A1	solute carrier family 34 member 1
221755_at	1.08e-20	3.4e-25	18.9739	46.9647	4.46994	4.46994	EHBP1L1	EH domain binding protein 1 like 1
202988_s_at	3.11e-13	4.64e-15	10.8668	24.0507	4.46796	4.46796	RGS1	regulator of G-protein signaling 1
217583_at	1.28e-13	1.65e-15	-11.1741	25.0725	-4.45996	4.45996	LOC101929036///PAH	uncharacterized LOC101929036///phenylalanine hydroxylase
205473_at	1.08e-15	4.81e-18	-12.986	30.8467	-4.45822	4.45822	ATP6V1B1	ATPase H+ transporting V1 subunit B1
1553153_at	1.56e-18	4.27e-22	-16.1945	40.0168	-4.45205	4.45205	ATP6V0D2	ATPase H+ transporting V0 subunit d2
220139_at	3.07e-13	4.57e-15	-10.8712	24.0654	-4.42393	4.42393	DNMT3L	DNA methyltransferase 3 like
233604_at	2.63e-12	5.55e-14	-10.1415	21.5916	-4.42062	4.42062	FLJ22763	uncharacterized LOC401081
1557474_at	7.28e-15	4.98e-17	-12.245	28.5379	-4.4188	4.4188	LOC284578	uncharacterized LOC284578
202237_at	4.18e-18	1.91e-21	15.6493	38.55	4.40684	4.40684	LOC101928916///NNMT	uncharacterized LOC101928916///nicotinamide N-methyltransferase
1553155_x_at	1.12e-17	1.09e-20	-15.0308	36.842	-4.40572	4.40572	ATP6V0D2	ATPase H+ transporting V0 subunit d2
31835_at	2.23e-16	6.04e-19	-13.6635	32.8934	-4.40534	4.40534	HRG	histidine rich glycoprotein
1552532_a_at	2.74e-15	1.49e-17	-12.6251	29.7313	-4.40284	4.40284	ATP6V1C2	ATPase H+ transporting V1 subunit C2
211357_s_at	1.82e-12	3.63e-14	-10.2645	22.0132	-4.39506	4.39506	ALDOB	aldolase, fructose-bisphosphate B
1554452_a_at	7.65e-15	5.32e-17	12.2248	28.474	4.39261	4.39261	HILPDA	hypoxia inducible lipid droplet associated
1553970_s_at	7.48e-12	1.84e-13	-9.79833	20.4064	-4.36637	4.36637	CEL	carboxyl ester lipase
206254_at	1.55e-13	2.09e-15	-11.1038	24.8399	-4.36402	4.36402	EGF	epidermal growth factor
223986_x_at	9.05e-18	7.45e-21	-15.1648	37.2159	-4.35426	4.35426	DMRT2	doublesex and mab-3 related transcription factor 2
220801_s_at	5.32e-12	1.24e-13	-9.91028	20.7945	-4.35035	4.35035	HAO2	hydroxyacid oxidase 2
209460_at	1.49e-17	1.61e-20	-14.8944	36.4588	-4.34763	4.34763	ABAT	4-aminobutyrate aminotransferase
231483_at	1.54e-09	8.09e-11	-8.10115	14.3715	-4.34523	4.34523	LOC100505985	uncharacterized LOC100505985
218507_at	4.99e-16	1.77e-18	13.3099	31.8329	4.3347	4.3347	HILPDA	hypoxia inducible lipid droplet associated
228462_at	5.56e-10	2.54e-11	-8.4192	15.5206	-4.32944	4.32944	IRX2	iroquois homeobox 2
239270_at	1.05e-11	2.72e-13	-9.68631	20.0166	-4.32002	4.32002	PLCXD3	phosphatidylinositol specific phospholipase C X domain containing 3
222083_at	9.13e-10	4.48e-11	-8.26284	14.9565	-4.31835	4.31835	GLYAT	glycine-N-acyltransferase
205910_s_at	9.97e-12	2.56e-13	-9.70397	20.0781	-4.31833	4.31833	CEL	carboxyl ester lipase
207407_x_at	7.05e-12	1.71e-13	-9.81824	20.4755	-4.31709	4.31709	CYP4A11	cytochrome P450 family 4 subfamily A member 11
213456_at	2.78e-08	2.11e-09	-7.21461	11.1442	-4.31549	4.31549	SOSTDC1	sclerostin domain containing 1
219866_at	8.06e-13	1.4e-14	-10.5411	22.9544	-4.31529	4.31529	CLIC5	chloride intracellular channel 5
224179_s_at	1.69e-13	2.3e-15	-11.075	24.7443	-4.30507	4.30507	MIOX	myo-inositol oxygenase
204393_s_at	4.28e-12	9.69e-14	-9.98121	21.0397	-4.30148	4.30148	ACPP	acid phosphatase, prostate
229057_at	5.91e-16	2.28e-18	-13.2275	31.5832	-4.29401	4.29401	SCN2A	sodium voltage-gated channel alpha subunit 2
205675_at	2.05e-14	1.8e-16	-11.8477	27.2699	-4.2867	4.2867	MTTP	microsomal triglyceride transfer protein
207378_at	2.83e-09	1.61e-10	-7.91257	13.6874	-4.28433	4.28433	TREH	trehalase
237350_at	3.51e-14	3.51e-16	-11.6422	26.6059	-4.28138	4.28138	TTC36	tetratricopeptide repeat domain 36
206259_at	3.83e-13	5.98e-15	-10.792	23.8001	-4.26584	4.26584	PROC	protein C, inactivator of coagulation factors Va and VIIIa
229302_at	6.61e-18	4.59e-21	-15.3358	37.6903	-4.25228	4.25228	TMEM178A	transmembrane protein 178A
226661_at	1.97e-10	7.79e-12	8.74507	16.6905	4.25013	4.25013	CDCA2	cell division cycle associated 2
1560383_at	4.16e-13	6.6e-15	-10.7629	23.7025	-4.24943	4.24943	LOC101928658	uncharacterized LOC101928658
211571_s_at	1.08e-12	1.98e-14	10.4413	22.616	4.24317	4.24317	VCAN	versican
220510_at	1.12e-17	1.01e-20	-15.0591	36.9212	-4.23439	4.23439	RHBG	Rh family B glycoprotein (gene/pseudogene)
218844_at	9.34e-18	7.86e-21	-15.1459	37.1634	-4.21424	4.21424	ACSF2	acyl-CoA synthetase family member 2
227194_at	2.57e-14	2.37e-16	-11.762	26.9937	-4.21266	4.21266	FAM3B	family with sequence similarity 3 member B
1552766_at	3.5e-11	1.09e-12	-9.29515	18.6449	-4.21044	4.21044	HS6ST2	heparan sulfate 6-O-sulfotransferase 2
201506_at	6.03e-16	2.34e-18	13.2186	31.5563	4.19905	4.19905	TGFBI	transforming growth factor beta induced
231677_at	5.13e-14	5.57e-16	-11.5022	26.1505	-4.198	4.198	LOC105377924	uncharacterized LOC105377924
231156_at	7.99e-14	9.29e-16	-11.3474	25.6436	-4.19005	4.19005	HAO2	hydroxyacid oxidase 2
220724_at	1.2e-13	1.53e-15	-11.1969	25.148	-4.18783	4.18783	CWH43	cell wall biogenesis 43 C-terminal homolog
229390_at	7.02e-17	1.36e-19	14.1618	34.3604	4.18643	4.18643	FAM26F	family with sequence similarity 26 member F
213915_at	2.08e-13	2.9e-15	11.0061	24.5153	4.18235	4.18235	NKG7	natural killer cell granule protein 7
218308_at	1.56e-18	4.27e-22	16.1949	40.0178	4.15854	4.15854	TACC3	transforming acidic coiled-coil containing protein 3
222847_s_at	4.66e-11	1.5e-12	9.20485	18.326	4.15639	4.15639	EGLN3	egl-9 family hypoxia inducible factor 3
222838_at	1.35e-12	2.56e-14	10.3662	22.3603	4.1535	4.1535	SLAMF7	SLAM family member 7
231480_at	3.02e-13	4.5e-15	-10.8763	24.0825	-4.15219	4.15219	SLC6A19	solute carrier family 6 member 19
204698_at	9.73e-15	7.09e-17	12.1353	28.1899	4.15129	4.15129	ISG20	interferon stimulated exonuclease gene 20
207981_s_at	2.15e-12	4.39e-14	-10.2092	21.8237	-4.149	4.149	ESRRG	estrogen related receptor gamma
209173_at	8.79e-12	2.21e-13	-9.7451	20.2213	-4.13484	4.13484	AGR2	anterior gradient 2, protein disulphide isomerase family member
202855_s_at	1.61e-14	1.33e-16	11.9411	27.57	4.12953	4.12953	MIR6787///SLC16A3	microRNA 6787///solute carrier family 16 member 3
217530_at	2.81e-16	8.4e-19	-13.5544	32.5681	-4.12824	4.12824	SLC34A1	solute carrier family 34 member 1
220503_at	3.3e-08	2.56e-09	-7.1621	10.9525	-4.11991	4.11991	SLC13A1	solute carrier family 13 member 1
219918_s_at	9.61e-13	1.73e-14	10.4809	22.7503	4.11793	4.11793	ASPM	abnormal spindle microtubule assembly
203824_at	2.13e-08	1.57e-09	-7.29548	11.4393	-4.11579	4.11579	TSPAN8	tetraspanin 8
229580_at	3.11e-10	1.32e-11	-8.60008	16.171	-4.11479	4.11479	CLSTN2	calsyntenin 2
220310_at	3.15e-15	1.77e-17	-12.5696	29.5583	-4.11443	4.11443	TUBAL3	tubulin alpha like 3
204965_at	5.72e-06	8.28e-07	-5.58767	5.26111	-4.10957	4.10957	GC	GC, vitamin D binding protein
231256_at	4.58e-13	7.41e-15	-10.7288	23.5878	-4.10557	4.10557	LOC727944	uncharacterized LOC727944
230883_at	1.91e-11	5.47e-13	-9.48808	19.3234	-4.09725	4.09725	NXPH2	neurexophilin 2
221530_s_at	2.9e-18	1.17e-21	15.8271	39.0323	4.09709	4.09709	BHLHE41	basic helix-loop-helix family member e41
1553394_a_at	1.38e-13	1.82e-15	-11.1454	24.9778	-4.09101	4.09101	TFAP2B	transcription factor AP-2 beta
214261_s_at	2.38e-14	2.18e-16	-11.7886	27.0797	-4.0904	4.0904	ADH6	alcohol dehydrogenase 6 (class V)
226147_s_at	7.7e-10	3.69e-11	-8.31622	15.1492	-4.0894	4.0894	PIGR	polymeric immunoglobulin receptor
215646_s_at	8.62e-13	1.52e-14	10.5187	22.8785	4.08272	4.08272	VCAN	versican
211192_s_at	1.05e-14	7.88e-17	12.1021	28.0843	4.07542	4.07542	CD84	CD84 molecule
32128_at	1.32e-09	6.81e-11	8.1483	14.5422	4.07367	4.07367	CCL18	C-C motif chemokine ligand 18
220604_x_at	1.68e-10	6.5e-12	-8.79531	16.8701	-4.07246	4.07246	FTCD	formimidoyltransferase cyclodeaminase
204289_at	2.82e-13	4.16e-15	-10.8992	24.159	-4.06514	4.06514	ALDH6A1	aldehyde dehydrogenase 6 family member A1
217319_x_at	1.52e-13	2.04e-15	-11.1109	24.8635	-4.06211	4.06211	CYP4A22///CYP4A11	cytochrome P450 family 4 subfamily A member 22///cytochrome P450 family 4 subfamily A member 11
220625_s_at	5.94e-12	1.41e-13	-9.87441	20.6703	-4.06119	4.06119	ELF5	E74 like ETS transcription factor 5
219768_at	7.64e-13	1.32e-14	-10.5602	23.019	-4.05783	4.05783	VTCN1	V-set domain containing T cell activation inhibitor 1
230830_at	6.58e-10	3.1e-11	-8.36458	15.3237	-4.04367	4.04367	SLC51B	solute carrier family 51 beta subunit
221009_s_at	2.22e-10	8.95e-12	8.70666	16.5531	4.04213	4.04213	ANGPTL4	angiopoietin like 4
240320_at	1.31e-14	1.03e-16	-12.02	27.8226	-4.03325	4.03325	RNF212B	ring finger protein 212B
1558034_s_at	3.67e-07	3.84e-08	6.42873	8.28053	4.03099	4.03099	CP	ceruloplasmin (ferroxidase)
220832_at	5.46e-16	2.08e-18	13.2579	31.6755	4.02754	4.02754	TLR8	toll like receptor 8
242375_x_at	2.46e-12	5.15e-14	-10.1635	21.6671	-4.0261	4.0261	LOC101929036///PAH	uncharacterized LOC101929036///phenylalanine hydroxylase
208006_at	2.81e-16	8.42e-19	-13.5537	32.5661	-4.02139	4.02139	FOXI1	forkhead box I1
209309_at	1.3e-12	2.46e-14	-10.3773	22.398	-4.0173	4.0173	AZGP1	alpha-2-glycoprotein 1, zinc-binding
1569926_s_at	8.6e-14	1.01e-15	-11.3211	25.5571	-4.01073	4.01073	SLC34A3	solute carrier family 34 member 3
233712_at	2.92e-16	8.87e-19	-13.5365	32.5145	-4.00971	4.00971	LOC101928574///LOC101060181///ZNF44	uncharacterized LOC101928574///zinc finger protein ZnFP12///zinc finger protein 44
215274_at	3.52e-16	1.1e-18	-13.4651	32.3003	-4.00745	4.00745	SLC12A3	solute carrier family 12 member 3
233155_at	2.12e-14	1.88e-16	-11.833	27.2226	-4.0053	4.0053	UPP2	uridine phosphorylase 2
206755_at	2.73e-15	1.46e-17	-12.6311	29.7499	-3.99983	3.99983	CYP2B6	cytochrome P450 family 2 subfamily B member 6
1563793_at	4.77e-12	1.09e-13	-9.9474	20.9229	-3.99947	3.99947	LOC100130278	uncharacterized LOC100130278
207444_at	7.01e-11	2.37e-12	-9.07682	17.8725	-3.99051	3.99051	SLC22A13	solute carrier family 22 member 13
238625_at	1.96e-09	1.06e-10	-8.02634	14.1003	-3.98893	3.98893	C1orf168	chromosome 1 open reading frame 168
1552797_s_at	4.46e-15	2.73e-17	-12.4342	29.1343	-3.97692	3.97692	PROM2	prominin 2
231496_at	4.52e-10	2.01e-11	-8.48278	15.7495	-3.97394	3.97394	FCAMR	Fc fragment of IgA and IgM receptor
204777_s_at	5.07e-12	1.18e-13	-9.92546	20.847	-3.9681	3.9681	MAL	mal, T-cell differentiation protein
242943_at	4.65e-15	2.87e-17	12.418	29.0834	3.96578	3.96578	ST8SIA4	ST8 alpha-N-acetyl-neuraminide alpha-2,8-sialyltransferase 4
210577_at	1.44e-14	1.16e-16	-11.9824	27.7024	-3.96439	3.96439	CASR	calcium sensing receptor
202628_s_at	4.25e-10	1.88e-11	8.50231	15.8197	3.9617	3.9617	SERPINE1	serpin family E member 1
211122_s_at	8.45e-11	2.95e-12	9.01498	17.653	3.96039	3.96039	CXCL11	C-X-C motif chemokine ligand 11
223185_s_at	2.86e-15	1.58e-17	12.6068	29.6743	3.95791	3.95791	BHLHE41	basic helix-loop-helix family member e41
238177_at	7.03e-15	4.73e-17	-12.2613	28.5896	-3.95723	3.95723	SLC6A19	solute carrier family 6 member 19
1562046_at	8.02e-11	2.77e-12	-9.03292	17.7167	-3.93816	3.93816	LOC101927244	uncharacterized LOC101927244
219803_at	1.2e-10	4.43e-12	-8.90217	17.2515	-3.93769	3.93769	ANGPTL3	angiopoietin like 3
231683_at	6.77e-14	7.65e-16	-11.4059	25.8357	-3.9267	3.9267	GLYAT	glycine-N-acyltransferase
211756_at	6.48e-09	4.13e-10	7.65691	12.7574	3.92201	3.92201	PTHLH	parathyroid hormone like hormone
206914_at	1.78e-12	3.51e-14	10.2739	22.0453	3.92039	3.92039	CRTAM	cytotoxic and regulatory T-cell molecule
209683_at	2.93e-14	2.8e-16	11.7112	26.8294	3.91861	3.91861	FAM49A	family with sequence similarity 49 member A
205464_at	1.36e-08	9.43e-10	-7.43298	11.9411	-3.90884	3.90884	SCNN1B	sodium channel epithelial 1 beta subunit
207419_s_at	5.65e-13	9.33e-15	10.6611	23.3597	3.90683	3.90683	RAC2	ras-related C3 botulinum toxin substrate 2 (rho family, small GTP binding protein Rac2)
209652_s_at	6.67e-09	4.27e-10	7.64773	12.724	3.8994	3.8994	PGF	placental growth factor
224940_s_at	1.48e-16	3.5e-19	-13.8443	33.4296	-3.89649	3.89649	PAPPA	pappalysin 1
219249_s_at	3.2e-13	4.82e-15	10.8558	24.0138	3.89638	3.89638	FKBP10	FK506 binding protein 10
212143_s_at	2.74e-14	2.57e-16	11.7378	26.9156	3.89317	3.89317	IGFBP3	insulin like growth factor binding protein 3
202752_x_at	1.71e-14	1.43e-16	-11.9175	27.4942	-3.8925	3.8925	SLC7A8	solute carrier family 7 member 8
218960_at	1.33e-11	3.59e-13	-9.60738	19.7411	-3.89123	3.89123	TMPRSS4	transmembrane protease, serine 4
238689_at	1.15e-12	2.12e-14	-10.421	22.5468	-3.89093	3.89093	ADGRF1	adhesion G protein-coupled receptor F1
236088_at	7.26e-11	2.47e-12	-9.06483	17.83	-3.89019	3.89019	NTNG1	netrin G1
1555214_a_at	1.05e-10	3.8e-12	8.94471	17.403	3.88874	3.88874	CLEC7A	C-type lectin domain family 7 member A
207544_s_at	4.93e-11	1.59e-12	-9.18819	18.2671	-3.88372	3.88372	ADH6	alcohol dehydrogenase 6 (class V)
237254_at	8.62e-15	6.15e-17	-12.1796	28.3306	-3.87784	3.87784	SLC5A11	solute carrier family 5 member 11
236892_s_at	1.64e-16	4.11e-19	-13.7912	33.2725	-3.87683	3.87683	HOXB-AS3	HOXB cluster antisense RNA 3
215446_s_at	1.45e-12	2.8e-14	10.3398	22.2705	3.87231	3.87231	LOX	lysyl oxidase
227506_at	3.16e-11	9.66e-13	-9.32793	18.7605	-3.86851	3.86851	SLC16A9	solute carrier family 16 member 9
228054_at	4.67e-16	1.59e-18	13.3455	31.9403	3.85678	3.85678	TMEM44	transmembrane protein 44
206286_s_at	1.33e-08	9.26e-10	-7.43798	11.9593	-3.85476	3.85476	TDGF1P3///TDGF1	teratocarcinoma-derived growth factor 1 pseudogene 3///teratocarcinoma-derived growth factor 1
230081_at	7.04e-12	1.71e-13	-9.819	20.4781	-3.85192	3.85192	PLCXD3	phosphatidylinositol specific phospholipase C X domain containing 3
206878_at	1.64e-14	1.36e-16	-11.9335	27.5457	-3.8504	3.8504	DAO	D-amino acid oxidase
231424_at	1.02e-09	5.06e-11	-8.22957	14.8362	-3.84907	3.84907	SLC5A12	solute carrier family 5 member 12
224480_s_at	1.24e-16	2.73e-19	-13.9284	33.6773	-3.84865	3.84865	GPAT3	glycerol-3-phosphate acyltransferase 3
205820_s_at	8.1e-12	2.02e-13	-9.77161	20.3135	-3.84333	3.84333	APOC3	apolipoprotein C3
1558324_a_at	2.41e-11	7.1e-13	-9.41473	19.0659	-3.84124	3.84124	TMEM72	transmembrane protein 72
231667_at	4.99e-09	3.08e-10	-7.73688	13.0486	-3.83827	3.83827	SLC39A5	solute carrier family 39 member 5
205216_s_at	3.56e-13	5.5e-15	-10.8169	23.8835	-3.83797	3.83797	APOH	apolipoprotein H
210992_x_at	1.33e-15	6.14e-18	12.9079	30.6067	3.82964	3.82964	FCGR2C	Fc fragment of IgG receptor IIc (gene/pseudogene)
220554_at	1.49e-17	1.58e-20	-14.901	36.4773	-3.82435	3.82435	SLC22A7	solute carrier family 22 member 7
209459_s_at	2.32e-17	3.01e-20	-14.6773	35.8441	-3.82087	3.82087	ABAT	4-aminobutyrate aminotransferase
201292_at	3.5e-12	7.7e-14	10.0475	21.2683	3.81834	3.81834	TOP2A	topoisomerase (DNA) II alpha
224300_x_at	1e-10	3.59e-12	-8.96032	17.4586	-3.81645	3.81645	FTCD	formimidoyltransferase cyclodeaminase
227629_at	6.28e-18	3.79e-21	-15.4041	37.8785	-3.81514	3.81514	PRLR	prolactin receptor
221661_at	5.43e-12	1.27e-13	-9.90338	20.7706	-3.80659	3.80659	SLC22A7	solute carrier family 22 member 7
221588_x_at	8.71e-18	6.69e-21	-15.2028	37.3216	-3.80462	3.80462	ALDH6A1	aldehyde dehydrogenase 6 family member A1
218585_s_at	2.34e-14	2.13e-16	11.7947	27.0994	3.80306	3.80306	DTL	denticleless E3 ubiquitin protein ligase homolog
231982_at	1.32e-07	1.23e-08	-6.73779	9.4045	-3.80207	3.80207	SMIM24	small integral membrane protein 24
202035_s_at	8e-12	1.99e-13	-9.77599	20.3287	-3.80202	3.80202	SFRP1	secreted frizzled related protein 1
1554931_at	7.04e-12	1.71e-13	-9.8191	20.4785	-3.79469	3.79469	CYP4A22///CYP4A11	cytochrome P450 family 4 subfamily A member 22///cytochrome P450 family 4 subfamily A member 11
209859_at	2.68e-12	5.68e-14	10.135	21.5694	3.78947	3.78947	TRIM9	tripartite motif containing 9
204268_at	4.25e-15	2.57e-17	-12.4531	29.1938	-3.78611	3.78611	S100A2	S100 calcium binding protein A2
227971_at	9.01e-15	6.46e-17	-12.164	28.2813	-3.78307	3.78307	NRK	Nik related kinase
238919_at	3.59e-11	1.11e-12	-9.28762	18.6183	-3.7816	3.7816	PCDH9	protocadherin 9
229241_at	3.34e-14	3.3e-16	-11.6611	26.6672	-3.78025	3.78025	LDHD	lactate dehydrogenase D
208383_s_at	5.68e-10	2.6e-11	-8.41267	15.4971	-3.77906	3.77906	PCK1	phosphoenolpyruvate carboxykinase 1
215563_s_at	4.64e-10	2.07e-11	-8.47474	15.7205	-3.77858	3.77858	MST1L	macrophage stimulating 1 like
219990_at	1.6e-10	6.16e-12	8.81032	16.9238	3.77424	3.77424	E2F8	E2F transcription factor 8
206552_s_at	2.92e-09	1.67e-10	-7.90263	13.6513	-3.77052	3.77052	TAC1	tachykinin precursor 1
211231_x_at	3.32e-12	7.24e-14	-10.0649	21.3283	-3.76505	3.76505	CYP4A11	cytochrome P450 family 4 subfamily A member 11
242372_s_at	2.09e-11	6.03e-13	-9.46071	19.2274	-3.76195	3.76195	MFSD4A	major facilitator superfamily domain containing 4A
218888_s_at	5.51e-11	1.8e-12	9.15284	18.142	3.75748	3.75748	NETO2	neuropilin and tolloid like 2
204846_at	3.15e-06	4.26e-07	5.77122	5.91304	3.7552	3.7552	CP	ceruloplasmin (ferroxidase)
1405_i_at	8.35e-14	9.83e-16	11.3306	25.5885	3.75222	3.75222	CCL5	C-C motif chemokine ligand 5
205676_at	3.64e-14	3.67e-16	-11.6289	26.5628	-3.75199	3.75199	CYP27B1	cytochrome P450 family 27 subfamily B member 1
207091_at	1.12e-16	2.31e-19	13.9836	33.8395	3.74535	3.74535	P2RX7	purinergic receptor P2X 7
211708_s_at	2.31e-12	4.77e-14	10.1857	21.7433	3.73993	3.73993	SCD	stearoyl-CoA desaturase
213553_x_at	4.44e-13	7.16e-15	10.7389	23.6218	3.73869	3.73869	APOC1	apolipoprotein C1
208034_s_at	9.81e-14	1.21e-15	-11.2676	25.3812	-3.73852	3.73852	PROZ	protein Z, vitamin K dependent plasma glycoprotein
219410_at	2.43e-12	5.07e-14	10.1679	21.6822	3.73465	3.73465	TMEM45A	transmembrane protein 45A
204607_at	4.38e-09	2.66e-10	-7.77679	13.1938	-3.73237	3.73237	HMGCS2	3-hydroxy-3-methylglutaryl-CoA synthase 2
207104_x_at	4.99e-16	1.78e-18	13.3083	31.8281	3.72744	3.72744	LILRB1	leukocyte immunoglobulin like receptor B1
223618_at	2e-11	5.72e-13	-9.4756	19.2797	-3.72644	3.72644	FMN2	formin 2
206836_at	2.41e-09	1.35e-10	7.96152	13.8652	3.71915	3.71915	SLC6A3	solute carrier family 6 member 3
220332_at	2.79e-11	8.4e-13	-9.36716	18.8986	-3.71857	3.71857	CLDN16	claudin 16
228236_at	1.34e-14	1.05e-16	-12.0119	27.7967	-3.70872	3.70872	SLC52A3	solute carrier family 52 member 3
205984_at	4.98e-12	1.15e-13	-9.93166	20.8685	-3.70583	3.70583	CRHBP	corticotropin releasing hormone binding protein
230836_at	1.64e-16	4.11e-19	13.7914	33.2731	3.70229	3.70229	ST8SIA4	ST8 alpha-N-acetyl-neuraminide alpha-2,8-sialyltransferase 4
220502_s_at	2.63e-09	1.48e-10	-7.93608	13.7728	-3.70022	3.70022	SLC13A1	solute carrier family 13 member 1
204014_at	9.97e-14	1.24e-15	11.2614	25.3607	3.69635	3.69635	DUSP4	dual specificity phosphatase 4
227450_at	3.18e-17	4.42e-20	-14.545	35.4667	-3.69422	3.69422	ERP27	endoplasmic reticulum protein 27
204006_s_at	4.59e-18	2.35e-21	15.5747	38.3466	3.69265	3.69265	FCGR3B///FCGR3A	Fc fragment of IgG receptor IIIb///Fc fragment of IgG receptor IIIa
219840_s_at	1.05e-14	7.84e-17	-12.1039	28.0901	-3.69235	3.69235	TCL6	T-cell leukemia/lymphoma 6 (non-protein coding)
219389_at	2.1e-12	4.27e-14	-10.2173	21.8515	-3.69193	3.69193	SUSD4	sushi domain containing 4
204290_s_at	2.95e-16	9e-19	-13.5318	32.5003	-3.68891	3.68891	ALDH6A1	aldehyde dehydrogenase 6 family member A1
206262_at	3.18e-10	1.35e-11	-8.59338	16.1469	-3.68692	3.68692	ADH1C	alcohol dehydrogenase 1C (class I), gamma polypeptide
229229_at	5.69e-08	4.75e-09	-6.99477	10.3417	-3.68661	3.68661	AGXT2	alanine--glyoxylate aminotransferase 2
202345_s_at	3.97e-12	8.92e-14	10.0051	21.1221	3.68208	3.68208	FABP5	fatty acid binding protein 5
213706_at	1.14e-10	4.17e-12	-8.91854	17.3098	-3.67993	3.67993	GPD1	glycerol-3-phosphate dehydrogenase 1
229177_at	1.43e-11	3.93e-13	-9.58203	19.6525	-3.66966	3.66966	C16orf89	chromosome 16 open reading frame 89
227480_at	5.7e-13	9.44e-15	-10.6576	23.3481	-3.6684	3.6684	SUSD2	sushi domain containing 2
216696_s_at	5.92e-12	1.4e-13	-9.87529	20.6733	-3.66838	3.66838	PRODH2	proline dehydrogenase 2
217028_at	2.13e-18	7.02e-22	16.0127	39.5316	3.66621	3.66621	CXCR4	C-X-C motif chemokine receptor 4
211384_s_at	8.89e-14	1.07e-15	-11.3058	25.5068	-3.66053	3.66053	CASR	calcium sensing receptor
205686_s_at	5.26e-14	5.74e-16	11.4931	26.1206	3.65014	3.65014	CD86	CD86 molecule
211712_s_at	1.4e-11	3.84e-13	-9.58864	19.6756	-3.64545	3.64545	ANXA9	annexin A9
207014_at	1.24e-12	2.32e-14	-10.3944	22.4562	-3.64129	3.64129	GABRA2	gamma-aminobutyric acid type A receptor alpha2 subunit
215108_x_at	2.33e-09	1.3e-10	-7.97263	13.9055	-3.63864	3.63864	TOX3	TOX high mobility group box family member 3
228128_x_at	7.03e-15	4.72e-17	-12.2617	28.5907	-3.63803	3.63803	PAPPA	pappalysin 1
205544_s_at	8.05e-09	5.28e-10	-7.59013	12.5141	-3.63783	3.63783	CR2	complement component 3d receptor 2
222774_s_at	4.8e-12	1.1e-13	9.94522	20.9154	3.63765	3.63765	NETO2	neuropilin and tolloid like 2
225353_s_at	2.78e-17	3.76e-20	14.6005	35.6251	3.63707	3.63707	C1QC	complement C1q C chain
210327_s_at	1.63e-11	4.56e-13	-9.5395	19.5036	-3.63679	3.63679	AGXT	alanine-glyoxylate aminotransferase
205572_at	1.2e-09	6.07e-11	8.18005	14.6572	3.63676	3.63676	ANGPT2	angiopoietin 2
222608_s_at	2.05e-09	1.12e-10	8.01223	14.0492	3.63623	3.63623	ANLN	anillin actin binding protein
204298_s_at	1.17e-10	4.29e-12	8.91109	17.2833	3.63255	3.63255	LOX	lysyl oxidase
204591_at	3.06e-10	1.29e-11	-8.60527	16.1896	-3.62785	3.62785	CHL1	cell adhesion molecule L1 like
210451_at	9.91e-09	6.65e-10	-7.52779	12.2869	-3.62382	3.62382	PKLR	pyruvate kinase, liver and RBC
216623_x_at	4.78e-08	3.9e-09	-7.04838	10.5374	-3.62186	3.62186	TOX3	TOX high mobility group box family member 3
206721_at	8e-14	9.32e-16	-11.3466	25.6411	-3.61786	3.61786	CCDC181	coiled-coil domain containing 181
211548_s_at	3.5e-12	7.71e-14	-10.047	21.2666	-3.6076	3.6076	HPGD	hydroxyprostaglandin dehydrogenase 15-(NAD)
239420_at	5.48e-17	9.31e-20	-14.2906	34.7342	-3.60625	3.60625	LINC01187	long intergenic non-protein coding RNA 1187
202998_s_at	2.13e-15	1.07e-17	12.7302	30.0579	3.60405	3.60405	LOXL2	lysyl oxidase like 2
220318_at	3.1e-14	3e-16	-11.6901	26.7612	-3.6039	3.6039	EPN3	epsin 3
209924_at	4.76e-08	3.88e-09	7.04977	10.5424	3.60371	3.60371	CCL18	C-C motif chemokine ligand 18
229168_at	3.49e-09	2.04e-10	7.84871	13.4554	3.60183	3.60183	COL23A1	collagen type XXIII alpha 1 chain
204192_at	8.85e-14	1.06e-15	11.309	25.5173	3.60009	3.60009	CD37	CD37 molecule
205311_at	3.47e-07	3.6e-08	-6.44583	8.3426	-3.59999	3.59999	DDC	dopa decarboxylase
214389_at	4.7e-10	2.1e-11	-8.47118	15.7077	-3.59615	3.59615	SLC5A12	solute carrier family 5 member 12
230889_at	2.89e-14	2.76e-16	-11.7156	26.8437	-3.59198	3.59198	LOC645321	uncharacterized LOC645321
223280_x_at	6.38e-17	1.17e-19	14.2135	34.5108	3.58885	3.58885	MS4A6A	membrane spanning 4-domains A6A
223939_at	2.22e-12	4.55e-14	-10.1989	21.7886	-3.58605	3.58605	SUCNR1	succinate receptor 1
231632_at	1.14e-15	5.07e-18	-12.9693	30.7955	-3.58293	3.58293	ERICH4	glutamate rich 4
1553746_a_at	1.9e-08	1.38e-09	-7.32929	11.5627	-3.57573	3.57573	OTOGL	otogelin like
224941_at	2.74e-15	1.5e-17	-12.6232	29.7253	-3.57441	3.57441	PAPPA	pappalysin 1
243901_at	5.29e-12	1.23e-13	-9.91207	20.8007	-3.57406	3.57406	ALDOB	aldolase, fructose-bisphosphate B
242998_at	3.07e-13	4.58e-15	-10.871	24.0647	-3.56935	3.56935	RDH12	retinol dehydrogenase 12 (all-trans/9-cis/11-cis)
1561951_at	9.8e-08	8.72e-09	-6.83057	9.74266	-3.5643	3.5643	SLC5A12	solute carrier family 5 member 12
227253_at	9.82e-07	1.15e-07	6.12927	7.19716	3.56336	3.56336	CP	ceruloplasmin (ferroxidase)
1555756_a_at	8.03e-11	2.78e-12	9.03215	17.714	3.56098	3.56098	CLEC7A	C-type lectin domain family 7 member A
214974_x_at	2.41e-05	4.14e-06	5.13777	3.68718	3.56029	3.56029	CXCL5	C-X-C motif chemokine ligand 5
230323_s_at	6.63e-09	4.24e-10	-7.64982	12.7316	-3.55874	3.55874	TMEM45B	transmembrane protein 45B
207567_at	1.05e-12	1.9e-14	-10.4522	22.653	-3.5529	3.5529	SLC13A2	solute carrier family 13 member 2
201720_s_at	2.11e-18	6.57e-22	16.0367	39.5961	3.54844	3.54844	LAPTM5	lysosomal protein transmembrane 5
216219_at	1.74e-14	1.47e-16	-11.9098	27.4695	-3.54423	3.54423	AQP6	aquaporin 6
207650_x_at	7.01e-12	1.7e-13	-9.82064	20.4838	-3.54418	3.54418	PTGER1	prostaglandin E receptor 1
1553043_a_at	1.32e-13	1.72e-15	11.1632	25.0365	3.53935	3.53935	CD300LF	CD300 molecule like family member f
228233_at	1.57e-12	3.07e-14	-10.3131	22.1793	-3.53463	3.53463	FREM1	FRAS1 related extracellular matrix 1
220146_at	2.4e-13	3.42e-15	10.9572	24.3525	3.53294	3.53294	TLR7	toll like receptor 7
224942_at	1.71e-17	1.98e-20	-14.8235	36.2588	-3.53123	3.53123	PAPPA	pappalysin 1
227645_at	1.21e-15	5.55e-18	12.94	30.7055	3.52592	3.52592	PIK3R5	phosphoinositide-3-kinase regulatory subunit 5
212992_at	4.99e-16	1.78e-18	13.309	31.8301	3.51867	3.51867	AHNAK2	AHNAK nucleoprotein 2
229158_at	6.42e-11	2.14e-12	-9.10526	17.9734	-3.51366	3.51366	WNK4	WNK lysine deficient protein kinase 4
203256_at	8.36e-10	4.05e-11	-8.29047	15.0563	-3.51329	3.51329	CDH3	cadherin 3
214774_x_at	1.71e-08	1.22e-09	-7.36388	11.689	-3.51165	3.51165	TOX3	TOX high mobility group box family member 3
228546_at	1.38e-10	5.2e-12	-8.85762	17.0926	-3.51143	3.51143	DPP6	dipeptidyl peptidase like 6
218542_at	6.31e-10	2.95e-11	8.37765	15.3708	3.50935	3.50935	CEP55	centrosomal protein 55
221605_s_at	6.49e-14	7.27e-16	-11.4213	25.886	-3.50757	3.50757	PIPOX	pipecolic acid and sarcosine oxidase
219574_at	1.16e-13	1.48e-15	11.2078	25.184	3.50292	3.50292	2020-03-01	membrane associated ring-CH-type finger 1
203065_s_at	1.49e-14	1.2e-16	11.9717	27.6679	3.50233	3.50233	CAV1	caveolin 1
210398_x_at	1.68e-09	8.96e-11	-8.07344	14.2711	-3.50192	3.50192	FUT6	fucosyltransferase 6
216092_s_at	3.6e-17	5.27e-20	-14.4848	35.294	-3.50132	3.50132	SLC7A8	solute carrier family 7 member 8
239791_at	5e-14	5.38e-16	-11.5126	26.1843	-3.49282	3.49282	HOXB-AS3	HOXB cluster antisense RNA 3
230422_at	1.62e-15	7.82e-18	12.8302	30.3672	3.49142	3.49142	FPR3	formyl peptide receptor 3
223979_x_at	6.87e-11	2.31e-12	-9.0836	17.8966	-3.49065	3.49065	FTCD	formimidoyltransferase cyclodeaminase
218755_at	8.09e-11	2.8e-12	9.0294	17.7042	3.48467	3.48467	KIF20A	kinesin family member 20A
1555612_s_at	1.1e-09	5.53e-11	-8.2053	14.7485	-3.48424	3.48424	G6PC	glucose-6-phosphatase catalytic subunit
203914_x_at	9.62e-13	1.73e-14	-10.48	22.7475	-3.48164	3.48164	HPGD	hydroxyprostaglandin dehydrogenase 15-(NAD)
225655_at	1.46e-10	5.52e-12	8.84089	17.0329	3.48138	3.48138	UHRF1	ubiquitin like with PHD and ring finger domains 1
1556554_at	1.06e-11	2.74e-13	-9.68462	20.0107	-3.48036	3.48036	TRIM50	tripartite motif containing 50
206672_at	1.67e-17	1.9e-20	-14.8376	36.2986	-3.4734	3.4734	AQP2	aquaporin 2
206529_x_at	2.74e-14	2.6e-16	-11.7345	26.905	-3.47312	3.47312	SLC26A4	solute carrier family 26 member 4
206508_at	6.41e-11	2.13e-12	9.10596	17.9759	3.47136	3.47136	CD70	CD70 molecule
206963_s_at	7.09e-07	8.01e-08	-6.22875	7.55625	-3.47025	3.47025	NAT8B///NAT8	N-acetyltransferase 8B (putative, gene/pseudogene)///N-acetyltransferase 8 (putative)
213160_at	1.92e-12	3.85e-14	10.2474	21.9548	3.47001	3.47001	DOCK2	dedicator of cytokinesis 2
219888_at	4.22e-14	4.39e-16	11.5746	26.3863	3.46939	3.46939	SPAG4	sperm associated antigen 4
1552755_at	1.61e-07	1.52e-08	-6.67955	9.19239	-3.46604	3.46604	C9orf66	chromosome 9 open reading frame 66
223699_at	3.04e-11	9.27e-13	-9.33952	18.8013	-3.46345	3.46345	CNDP1	carnosine dipeptidase 1
226597_at	3.22e-14	3.13e-16	-11.6773	26.7198	-3.46115	3.46115	REEP6	receptor accessory protein 6
1555553_a_at	7.82e-12	1.93e-13	-9.78411	20.3569	-3.45759	3.45759	SLC22A7	solute carrier family 22 member 7
218145_at	1.21e-14	9.38e-17	12.0482	27.9126	3.45607	3.45607	TRIB3	tribbles pseudokinase 3
202095_s_at	1.5e-10	5.69e-12	8.83211	17.0016	3.45584	3.45584	BIRC5	baculoviral IAP repeat containing 5
1555788_a_at	3.21e-11	9.81e-13	9.32344	18.7446	3.45519	3.45519	TRIB3	tribbles pseudokinase 3
203722_at	3.02e-15	1.69e-17	-12.5858	29.609	-3.45063	3.45063	ALDH4A1	aldehyde dehydrogenase 4 family member A1
241476_at	4.79e-09	2.94e-10	-7.74935	13.094	-3.448	3.448	LOC105375115	uncharacterized LOC105375115
231517_at	2.03e-10	8.06e-12	-8.73561	16.6567	-3.44476	3.44476	ZYG11A	zyg-11 family member A, cell cycle regulator
211148_s_at	1.96e-10	7.72e-12	8.74782	16.7004	3.44429	3.44429	ANGPT2	angiopoietin 2
204825_at	3.47e-12	7.61e-14	10.0508	21.2796	3.44419	3.44419	MELK	maternal embryonic leucine zipper kinase
213845_at	4.52e-11	1.45e-12	-9.2144	18.3598	-3.44396	3.44396	GRIK2	glutamate ionotropic receptor kainate type subunit 2
205478_at	4.3e-08	3.45e-09	-7.08167	10.6588	-3.4419	3.4419	PPP1R1A	protein phosphatase 1 regulatory inhibitor subunit 1A
211887_x_at	3.51e-12	7.74e-14	10.046	21.2632	3.44114	3.44114	MSR1	macrophage scavenger receptor 1
221590_s_at	1.12e-17	1.08e-20	-15.0352	36.8543	-3.44092	3.44092	ALDH6A1	aldehyde dehydrogenase 6 family member A1
200832_s_at	8.45e-15	6.01e-17	12.1863	28.3519	3.44035	3.44035	SCD	stearoyl-CoA desaturase
206219_s_at	2.71e-13	3.95e-15	10.9144	24.2096	3.43709	3.43709	VAV1	vav guanine nucleotide exchange factor 1
202856_s_at	5.46e-16	2.08e-18	13.2578	31.675	3.43674	3.43674	MIR6787///SLC16A3	microRNA 6787///solute carrier family 16 member 3
1556209_at	6.46e-09	4.11e-10	7.65804	12.7615	3.4354	3.4354	CLEC2B	C-type lectin domain family 2 member B
219191_s_at	5.17e-17	8.55e-20	14.3197	34.8186	3.43504	3.43504	BIN2	bridging integrator 2
202920_at	1.44e-14	1.15e-16	-11.9863	27.7146	-3.42977	3.42977	ANK2	ankyrin 2, neuronal
206420_at	8.78e-14	1.04e-15	11.3122	25.5281	3.42764	3.42764	IGSF6	immunoglobulin superfamily member 6
232424_at	1.51e-11	4.19e-13	-9.56394	19.5892	-3.42532	3.42532	PRDM16	PR/SET domain 16
201981_at	1.56e-12	3.03e-14	-10.3165	22.1907	-3.42443	3.42443	PAPPA	pappalysin 1
243672_at	2.14e-10	8.56e-12	-8.71899	16.5972	-3.42277	3.42277	SALL3	spalt like transcription factor 3
225000_at	1.86e-14	1.57e-16	-11.8882	27.4001	-0.899522	0.899522	PRKAR2A	protein kinase cAMP-dependent type II regulatory subunit alpha
206488_s_at	9.21e-09	6.13e-10	7.54954	12.3662	3.42172	3.42172	CD36	CD36 molecule
214475_x_at	3.32e-14	3.26e-16	-11.6649	26.6796	-3.42096	3.42096	CAPN3	calpain 3
1555533_at	4.5e-09	2.74e-10	7.7683	13.1629	3.42066	3.42066	QRFPR	pyroglutamylated RFamide peptide receptor
202404_s_at	1.66e-10	6.41e-12	8.79918	16.884	3.41791	3.41791	COL1A2	collagen type I alpha 2 chain
204997_at	1.59e-09	8.44e-11	-8.08955	14.3295	-3.41659	3.41659	GPD1	glycerol-3-phosphate dehydrogenase 1
224358_s_at	3.64e-12	8.04e-14	10.0349	21.225	3.41604	3.41604	MS4A7	membrane spanning 4-domains A7
217965_s_at	1.91e-14	1.65e-16	11.8744	27.3558	0.924299	0.924299	SAP30BP	SAP30 binding protein
215389_s_at	7.91e-13	1.37e-14	-10.5475	22.9761	-3.4158	3.4158	TNNT2	troponin T2, cardiac type
1555112_a_at	4.21e-14	4.36e-16	-11.5767	26.3931	-3.41372	3.41372	CCDC181	coiled-coil domain containing 181
214347_s_at	8.2e-07	9.43e-08	-6.18428	7.39562	-3.41057	3.41057	DDC	dopa decarboxylase
210895_s_at	4.67e-16	1.58e-18	13.3471	31.9451	3.41053	3.41053	CD86	CD86 molecule
207213_s_at	3.69e-09	2.18e-10	-7.83055	13.3893	-3.41047	3.41047	USP2	ubiquitin specific peptidase 2
204162_at	8.87e-11	3.13e-12	8.99903	17.5963	3.41017	3.41017	NDC80	NDC80, kinetochore complex component
229740_at	1.3e-18	1.69e-22	-16.5374	40.9213	-3.40892	3.40892	SMIM5	small integral membrane protein 5
224356_x_at	1.24e-16	2.77e-19	13.9226	33.6604	3.40886	3.40886	MS4A6A	membrane spanning 4-domains A6A
208240_s_at	1.26e-13	1.62e-15	-11.1802	25.0927	-3.40595	3.40595	FGF1	fibroblast growth factor 1
208071_s_at	4.89e-16	1.71e-18	13.322	31.8694	3.40539	3.40539	LAIR1	leukocyte associated immunoglobulin like receptor 1
212998_x_at	3.88e-16	1.26e-18	13.4225	32.1724	3.40118	3.40118	LOC101060835///HLA-DQB1	HLA class II histocompatibility antigen, DQ beta 1 chain-like///major histocompatibility complex, class II, DQ beta 1
221008_s_at	5.82e-10	2.68e-11	-8.40457	15.4679	-3.40113	3.40113	ETNPPL	ethanolamine-phosphate phospho-lyase
214228_x_at	1.17e-16	2.49e-19	13.959	33.7674	3.40087	3.40087	TNFRSF4	TNF receptor superfamily member 4
1553392_at	8.46e-08	7.39e-09	6.87538	9.90608	3.40011	3.40011	LOC102724660///EFCAB3	uncharacterized LOC102724660///EF-hand calcium binding domain 3
224299_x_at	1.38e-10	5.17e-12	-8.85912	17.098	-3.39801	3.39801	FTCD	formimidoyltransferase cyclodeaminase
203331_s_at	4.74e-13	7.71e-15	10.7171	23.5483	3.39798	3.39798	INPP5D	inositol polyphosphate-5-phosphatase D
236957_at	6.6e-12	1.58e-13	9.8406	20.5531	3.39491	3.39491	CDCA2	cell division cycle associated 2
233504_at	3.24e-11	9.94e-13	-9.31979	18.7318	-3.39483	3.39483	C9orf84	chromosome 9 open reading frame 84
231559_at	7.47e-13	1.28e-14	10.5677	23.0443	3.39437	3.39437	NNMT	nicotinamide N-methyltransferase
209966_x_at	1.2e-13	1.54e-15	-11.196	25.145	-3.39374	3.39374	ESRRG	estrogen related receptor gamma
233510_s_at	9.08e-13	1.62e-14	10.5001	22.8157	3.39068	3.39068	PARVG	parvin gamma
1553989_a_at	2.06e-15	1.03e-17	-12.7432	30.0984	-3.38967	3.38967	ATP6V1C2	ATPase H+ transporting V1 subunit C2
202953_at	7.26e-16	3.03e-18	13.1355	31.3036	3.38939	3.38939	C1QB	complement C1q B chain
217984_at	1.06e-17	9.1e-21	15.0945	37.02	3.38729	3.38729	RNASET2	ribonuclease T2
221731_x_at	1.37e-12	2.62e-14	10.3595	22.3374	3.38701	3.38701	VCAN	versican
210984_x_at	7.51e-10	3.58e-11	8.32429	15.1784	3.38532	3.38532	EGFR	epidermal growth factor receptor
230686_s_at	9.25e-14	1.12e-15	-11.2922	25.4622	-3.383	3.383	SLC13A3	solute carrier family 13 member 3
230585_at	2.69e-10	1.12e-11	-8.64564	16.3344	-3.38217	3.38217	KCNJ15	potassium voltage-gated channel subfamily J member 15
212097_at	3.87e-17	5.88e-20	14.4474	35.1867	3.38147	3.38147	CAV1	caveolin 1
232606_at	2.03e-08	1.48e-09	-7.31087	11.4955	-3.37806	3.37806	ANK2	ankyrin 2, neuronal
207677_s_at	9.24e-12	2.34e-13	9.72958	20.1673	3.37317	3.37317	NCF4	neutrophil cytosolic factor 4
222073_at	5.75e-10	2.64e-11	-8.408	15.4802	-3.37194	3.37194	COL4A3	collagen type IV alpha 3 chain
216039_at	1.67e-13	2.26e-15	-11.0802	24.7616	-3.37183	3.37183	GABRA2	gamma-aminobutyric acid type A receptor alpha2 subunit
220484_at	1.46e-09	7.67e-11	-8.11571	14.4243	-3.3682	3.3682	MCOLN3	mucolipin 3
220148_at	1.38e-09	7.16e-11	-8.13466	14.4929	-3.36623	3.36623	ALDH8A1	aldehyde dehydrogenase 8 family member A1
236523_at	3.5e-09	2.05e-10	-7.84699	13.4491	-3.36577	3.36577	LOC285556	uncharacterized LOC285556
243669_s_at	7.27e-08	6.25e-09	-6.92065	10.0712	-3.36547	3.36547	PRAP1	proline rich acidic protein 1
219735_s_at	1.3e-18	2.46e-22	-16.399	40.5579	-3.36505	3.36505	TFCP2L1	transcription factor CP2-like 1
204620_s_at	3.88e-13	6.09e-15	10.7867	23.7822	3.36145	3.36145	VCAN	versican
219277_s_at	2.28e-10	9.22e-12	-8.69848	16.5238	-3.35717	3.35717	OGDHL	oxoglutarate dehydrogenase-like
217628_at	4.52e-11	1.44e-12	-9.21485	18.3614	-3.35594	3.35594	CLIC5	chloride intracellular channel 5
235904_at	1.88e-08	1.36e-09	-7.33326	11.5772	-3.35319	3.35319	UGT3A1	UDP glycosyltransferase family 3 member A1
203913_s_at	6.46e-12	1.54e-13	-9.84777	20.5779	-3.35287	3.35287	HPGD	hydroxyprostaglandin dehydrogenase 15-(NAD)
1555745_a_at	1.51e-07	1.42e-08	6.69937	9.26453	3.35253	3.35253	LYZ	lysozyme
1554899_s_at	3.28e-17	4.62e-20	14.5302	35.4241	3.35181	3.35181	FCER1G	Fc fragment of IgE receptor Ig
210029_at	3.78e-12	8.45e-14	10.0207	21.1758	3.35046	3.35046	IDO1	indoleamine 2,3-dioxygenase 1
1555229_a_at	6.93e-09	4.46e-10	7.63615	12.6818	3.3502	3.3502	C1S	complement component 1, s subcomponent
225846_at	1.93e-10	7.6e-12	-8.75218	16.716	-3.3483	3.3483	ESRP1	epithelial splicing regulatory protein 1
235048_at	1.73e-13	2.37e-15	-11.0664	24.7159	-3.34774	3.34774	FAM169A	family with sequence similarity 169 member A
237639_at	2.03e-12	4.12e-14	-10.2275	21.8867	-3.34697	3.34697	TMEM207	transmembrane protein 207
210397_at	1.38e-10	5.2e-12	-8.85737	17.0917	-3.34671	3.34671	DEFB1	defensin beta 1
216603_at	6.96e-11	2.34e-12	-9.07932	17.8814	-3.34436	3.34436	SLC7A8	solute carrier family 7 member 8
205523_at	6.56e-08	5.58e-09	6.95129	10.183	3.34328	3.34328	HAPLN1	hyaluronan and proteoglycan link protein 1
221724_s_at	9.14e-12	2.31e-13	9.73335	20.1804	3.3426	3.3426	CLEC4A	C-type lectin domain family 4 member A
209590_at	4.56e-13	7.37e-15	-10.7302	23.5925	-3.34187	3.34187	BMP7	bone morphogenetic protein 7
220059_at	6.43e-14	7.13e-16	-11.4274	25.9059	-3.34164	3.34164	STAP1	signal transducing adaptor family member 1
202627_s_at	5.56e-10	2.54e-11	8.41905	15.52	3.33639	3.33639	SERPINE1	serpin family E member 1
231051_at	4.68e-15	2.89e-17	-12.4153	29.0749	-3.33491	3.33491	MRLN	myoregulin
206686_at	1.18e-10	4.37e-12	8.90594	17.2649	3.33397	3.33397	PDK1	pyruvate dehydrogenase kinase 1
211882_x_at	1.47e-09	7.72e-11	-8.11425	14.419	-3.33376	3.33376	FUT6	fucosyltransferase 6
217248_s_at	2.49e-13	3.6e-15	-10.9425	24.3034	-3.33121	3.33121	SLC7A8	solute carrier family 7 member 8
239291_at	9.9e-09	6.64e-10	-7.52813	12.2881	-3.33114	3.33114	TRPM3	transient receptor potential cation channel subfamily M member 3
209642_at	7.23e-09	4.67e-10	7.62351	12.6357	3.32973	3.32973	BUB1	BUB1 mitotic checkpoint serine/threonine kinase
220376_at	3.18e-08	2.46e-09	-7.17316	10.9928	-3.32655	3.32655	LRRC19	leucine rich repeat containing 19
219737_s_at	1.73e-11	4.87e-13	-9.52117	19.4394	-3.32056	3.32056	PCDH9	protocadherin 9
209933_s_at	7.02e-14	8e-16	11.3924	25.7913	3.31852	3.31852	CD300A	CD300a molecule
210095_s_at	1.01e-14	7.42e-17	12.121	28.1444	3.31659	3.31659	IGFBP3	insulin like growth factor binding protein 3
229254_at	8.79e-09	5.82e-10	-7.56366	12.4177	-3.31555	3.31555	MFSD4A	major facilitator superfamily domain containing 4A
220393_at	5.64e-07	6.22e-08	-6.29767	7.80556	-3.31326	3.31326	LGSN	lengsin, lens protein with glutamine synthetase domain
209343_at	2.4e-15	1.24e-17	-12.6841	29.9148	-3.31079	3.31079	EFHD1	EF-hand domain family member D1
215129_at	6.43e-14	7.13e-16	-11.4275	25.9062	-3.31051	3.31051	PIK3C2G	phosphatidylinositol-4-phosphate 3-kinase catalytic subunit type 2 gamma
229391_s_at	1.44e-15	6.78e-18	12.8758	30.508	3.3099	3.3099	FAM26F	family with sequence similarity 26 member F
202112_at	2.28e-10	9.23e-12	8.69824	16.5229	3.30971	3.30971	VWF	von Willebrand factor
206872_at	7.82e-09	5.11e-10	-7.59904	12.5466	-3.30967	3.30967	SLC17A1	solute carrier family 17 member 1
243799_x_at	1.13e-11	2.96e-13	-9.66275	19.9344	-3.30742	3.30742	ANGPTL3	angiopoietin like 3
228018_at	1.92e-07	1.86e-08	-6.62507	8.99406	-3.30721	3.30721	NKAIN4	Na+/K+ transporting ATPase interacting 4
221648_s_at	6.92e-10	3.28e-11	-8.34901	15.2675	-3.30692	3.30692	AGMAT	agmatinase
229975_at	3.59e-11	1.12e-12	-9.28709	18.6165	-3.29935	3.29935	BMPR1B	bone morphogenetic protein receptor type 1B
218741_at	4.97e-12	1.15e-13	9.93307	20.8734	3.29482	3.29482	CENPM	centromere protein M
204982_at	1.16e-13	1.48e-15	11.2075	25.1831	3.2939	3.2939	GIT2	GIT ArfGAP 2
224156_x_at	5.68e-08	4.74e-09	-6.99568	10.345	-3.29282	3.29282	IL17RB	interleukin 17 receptor B
220100_at	5.42e-08	4.5e-09	-7.00953	10.3955	-3.28502	3.28502	SLC22A11	solute carrier family 22 member 11
244353_s_at	9.81e-15	7.18e-17	-12.1313	28.1774	-3.28419	3.28419	SLC2A12	solute carrier family 2 member 12
219962_at	6.46e-05	1.24e-05	-4.82407	2.61519	-3.28327	3.28327	ACE2	angiotensin I converting enzyme 2
204476_s_at	6.45e-13	1.08e-14	-10.617	23.2111	-3.28095	3.28095	PC	pyruvate carboxylase
210179_at	2.08e-10	8.28e-12	-8.72837	16.6308	-3.28084	3.28084	KCNJ13	potassium voltage-gated channel subfamily J member 13
232694_at	6.62e-09	4.24e-10	7.65013	12.7327	3.2806	3.2806	ZNF395	zinc finger protein 395
204900_x_at	1.12e-17	1.1e-20	15.0265	36.8299	3.27609	3.27609	SAP30	Sin3A associated protein 30
231052_at	3.68e-12	8.17e-14	-10.0301	21.2085	-3.2739	3.2739	GLOD5	glyoxalase domain containing 5
209560_s_at	2.06e-08	1.51e-09	-7.30601	11.4778	-3.27109	3.27109	DLK1	delta like non-canonical Notch ligand 1
219461_at	4.33e-11	1.38e-12	-9.22864	18.4101	-3.26937	3.26937	PAK6	p21 (RAC1) activated kinase 6
1552691_at	3.86e-11	1.2e-12	9.26589	18.5417	3.2688	3.2688	ARL11	ADP ribosylation factor like GTPase 11
206134_at	9.96e-08	8.88e-09	6.82563	9.72466	3.26575	3.26575	ADAMDEC1	ADAM like decysin 1
205557_at	1.57e-09	8.31e-11	-8.09409	14.3459	-3.26528	3.26528	LOC149684///BPI	uncharacterized LOC149684///bactericidal/permeability-increasing protein
239183_at	1.48e-09	7.76e-11	-8.11273	14.4134	-3.26374	3.26374	ANGPTL1	angiopoietin like 1
228273_at	1.08e-14	8.16e-17	12.0913	28.05	3.26263	3.26263	PRR11	proline rich 11
215729_s_at	7.24e-10	3.44e-11	-8.33526	15.2179	-3.2605	3.2605	VGLL1	vestigial like family member 1
204619_s_at	9.27e-12	2.35e-13	9.72823	20.1626	3.25961	3.25961	VCAN	versican
232494_at	4.88e-10	2.19e-11	-8.45995	15.6673	-3.2568	3.2568	CYP8B1	cytochrome P450 family 8 subfamily B member 1
218232_at	1.21e-15	5.49e-18	12.9436	30.7165	3.25195	3.25195	C1QA	complement C1q A chain
214366_s_at	1.42e-09	7.42e-11	8.125	14.4579	3.25092	3.25092	ALOX5	arachidonate 5-lipoxygenase
224761_at	4.67e-14	4.94e-16	11.5385	26.2687	0.953059	0.953059	GNA13	G protein subunit alpha 13
227794_at	2.58e-10	1.06e-11	-8.65996	16.3857	-3.25005	3.25005	LOC100287413///GLYATL1	uncharacterized LOC100287413///glycine-N-acyltransferase like 1
216604_s_at	8.36e-11	2.91e-12	-9.0188	17.6665	-3.24758	3.24758	SLC7A8	solute carrier family 7 member 8
235746_s_at	1.16e-10	4.24e-12	-8.91409	17.294	-3.24335	3.24335	PLA2R1	phospholipase A2 receptor 1
205777_at	7.84e-13	1.36e-14	-10.5509	22.9877	-3.24266	3.24266	DUSP9	dual specificity phosphatase 9
235129_at	1.02e-09	5.07e-11	-8.22913	14.8347	-3.24072	3.24072	PPP1R1A	protein phosphatase 1 regulatory inhibitor subunit 1A
214842_s_at	1.27e-09	6.47e-11	-8.16246	14.5935	-3.23848	3.23848	ALB	albumin
1559131_a_at	1.51e-11	4.18e-13	-9.56419	19.59	-3.23787	3.23787	LOC101928047	uncharacterized LOC101928047
220675_s_at	2.37e-12	4.92e-14	-10.1762	21.7109	-3.23496	3.23496	PNPLA3	patatin like phospholipase domain containing 3
203915_at	2.72e-12	5.78e-14	10.1299	21.5517	3.23111	3.23111	CXCL9	C-X-C motif chemokine ligand 9
91703_at	6.88e-14	7.79e-16	11.4007	25.8183	3.22811	3.22811	EHBP1L1	EH domain binding protein 1 like 1
223344_s_at	9.67e-15	7e-17	12.1389	28.2014	3.227	3.227	MS4A7	membrane spanning 4-domains A7
224102_at	3.75e-08	2.95e-09	7.12368	10.8122	3.22523	3.22523	P2RY12	purinergic receptor P2Y12
223702_x_at	1.74e-11	4.91e-13	-9.51906	19.432	-3.22385	3.22385	FTCD	formimidoyltransferase cyclodeaminase
234310_s_at	8.39e-11	2.93e-12	-9.01711	17.6605	-3.22294	3.22294	SUSD2	sushi domain containing 2
201890_at	3.12e-13	4.68e-15	10.8643	24.0421	3.22125	3.22125	RRM2	ribonucleotide reductase regulatory subunit M2
232202_at	3.62e-10	1.57e-11	-8.55135	15.996	-3.22106	3.22106	FAM83B	family with sequence similarity 83 member B
224252_s_at	8.79e-14	1.05e-15	11.3115	25.5256	3.22032	3.22032	FXYD5	FXYD domain containing ion transport regulator 5
202740_at	1.04e-16	2.1e-19	-14.0161	33.9349	-3.21587	3.21587	ABHD14A-ACY1///ACY1	ABHD14A-ACY1 readthrough///aminoacylase 1
219476_at	1.04e-09	5.22e-11	-8.22144	14.8068	-3.21382	3.21382	C1orf116	chromosome 1 open reading frame 116
211607_x_at	2.59e-11	7.69e-13	9.39215	18.9865	3.21367	3.21367	EGFR	epidermal growth factor receptor
219255_x_at	5.73e-08	4.79e-09	-6.99291	10.3349	-3.21321	3.21321	IL17RB	interleukin 17 receptor B
213285_at	3.04e-15	1.7e-17	-12.5832	29.6009	-3.20708	3.20708	TMEM30B	transmembrane protein 30B
217014_s_at	2.35e-14	2.14e-16	-11.7935	27.0954	-3.20619	3.20619	AZGP1P1///AZGP1	alpha-2-glycoprotein 1, zinc-binding pseudogene 1///alpha-2-glycoprotein 1, zinc-binding
219643_at	7.63e-11	2.62e-12	-9.04816	17.7708	-3.20514	3.20514	LRP1B	LDL receptor related protein 1B
226254_s_at	6.25e-14	6.91e-16	11.4369	25.9371	0.942925	0.942925	CFAP97	cilia and flagella associated protein 97
217767_at	2.34e-10	9.5e-12	8.69028	16.4944	3.20458	3.20458	C3	complement component 3
220135_s_at	5.73e-10	2.63e-11	-8.40915	15.4844	-3.20103	3.20103	SLC7A9	solute carrier family 7 member 9
1552619_a_at	2.42e-10	9.91e-12	8.67862	16.4526	3.19991	3.19991	ANLN	anillin actin binding protein
231208_at	2.18e-13	3.09e-15	-10.9878	24.4546	-3.19976	3.19976	SLC13A3	solute carrier family 13 member 3
209757_s_at	3.05e-13	4.55e-15	-10.873	24.0714	-3.19892	3.19892	MYCN	v-myc avian myelocytomatosis viral oncogene neuroblastoma derived homolog
204533_at	3.08e-14	2.98e-16	11.6924	26.7688	3.19646	3.19646	CXCL10	C-X-C motif chemokine ligand 10
209474_s_at	2.65e-11	7.91e-13	9.38422	18.9586	3.19604	3.19604	ENTPD1	ectonucleoside triphosphate diphosphohydrolase 1
206298_at	9.75e-12	2.49e-13	9.71167	20.1049	3.19589	3.19589	ARHGAP22	Rho GTPase activating protein 22
235515_at	7.6e-14	8.77e-16	-11.3647	25.7005	-3.19333	3.19333	SYNE4	spectrin repeat containing nuclear envelope family member 4
214910_s_at	3.49e-10	1.5e-11	-8.56375	16.0405	-3.19284	3.19284	APOM	apolipoprotein M
207085_x_at	5.77e-14	6.33e-16	11.4632	26.0229	3.19167	3.19167	CSF2RA	colony stimulating factor 2 receptor alpha subunit
222712_s_at	1.23e-08	8.46e-10	-7.46219	12.0476	-3.1893	3.1893	MUC13	mucin 13, cell surface associated
206692_at	8.04e-12	2e-13	-9.774	20.3218	-3.18762	3.18762	KCNJ10	potassium voltage-gated channel subfamily J member 10
205154_at	1.11e-12	2.04e-14	-10.4325	22.5861	-3.18534	3.18534	LRRN2	leucine rich repeat neuronal 2
214567_s_at	5.89e-10	2.71e-11	8.40065	15.4537	3.18261	3.18261	XCL2///XCL1	X-C motif chemokine ligand 2///X-C motif chemokine ligand 1
237450_at	2.78e-12	5.94e-14	-10.122	21.5246	-3.18233	3.18233	LOC389332	uncharacterized LOC389332
204962_s_at	1.86e-12	3.73e-14	10.2567	21.9864	3.17975	3.17975	SLC35F6///CENPA	solute carrier family 35 member F6///centromere protein A
1558323_at	7.75e-10	3.73e-11	-8.31364	15.1399	-3.17894	3.17894	TMEM72	transmembrane protein 72
217983_s_at	1.73e-15	8.44e-18	12.806	30.2926	3.1752	3.1752	RNASET2	ribonuclease T2
1555907_at	1.56e-09	8.24e-11	8.09641	14.3543	3.1728	3.1728	AGAP2-AS1	AGAP2 antisense RNA 1
1552549_a_at	1.67e-17	1.9e-20	-14.8374	36.2979	-3.17231	3.17231	BSND	barttin CLCNK type accessory beta subunit
202286_s_at	1.43e-08	1e-09	-7.41694	11.8826	-3.17084	3.17084	TACSTD2	tumor-associated calcium signal transducer 2
228194_s_at	4.11e-09	2.47e-10	-7.79733	13.2685	-3.17019	3.17019	SORCS1	sortilin related VPS10 domain containing receptor 1
217590_s_at	3.48e-09	2.03e-10	7.84983	13.4595	3.16803	3.16803	TRPA1	transient receptor potential cation channel subfamily A member 1
205242_at	2.05e-06	2.62e-07	5.90431	6.38865	3.16567	3.16567	CXCL13	C-X-C motif chemokine ligand 13
214088_s_at	1.54e-13	2.08e-15	-11.1061	24.8474	-3.16434	3.16434	FUT3	fucosyltransferase 3 (Lewis blood group)
213438_at	4.4e-10	1.95e-11	-8.4912	15.7798	-3.16409	3.16409	NFASC	neurofascin
206558_at	2.52e-11	7.46e-13	-9.40073	19.0167	-3.16326	3.16326	SIM2	single-minded family bHLH transcription factor 2
1562309_s_at	5.65e-10	2.59e-11	-8.41405	15.502	-3.16302	3.16302	PHF21B	PHD finger protein 21B
230822_at	4.55e-12	1.03e-13	-9.96238	20.9747	-3.16183	3.16183	TMEM61	transmembrane protein 61
206717_at	8.28e-06	1.26e-06	-5.47151	4.85118	-3.16157	3.16157	MYH8	myosin heavy chain 8
205477_s_at	6.14e-10	2.86e-11	-8.3867	15.4035	-3.15948	3.15948	AMBP	alpha-1-microglobulin/bikunin precursor
1556300_s_at	3.66e-07	3.83e-08	-6.42912	8.28194	-3.15865	3.15865	SIM1	single-minded family bHLH transcription factor 1
236972_at	4.33e-09	2.62e-10	-7.78088	13.2087	-3.15779	3.15779	TRIM63	tripartite motif containing 63
230084_at	4.89e-14	5.22e-16	-11.5216	26.2137	-3.15754	3.15754	SLC30A2	solute carrier family 30 member 2
220303_at	1.15e-08	7.85e-10	-7.4825	12.1217	-3.1559	3.1559	PDZD3	PDZ domain containing 3
231195_at	2.48e-13	3.56e-15	-10.9453	24.313	-3.15372	3.15372	KLRG2	killer cell lectin like receptor G2
206346_at	5.84e-13	9.68e-15	-10.65	23.3225	-3.15028	3.15028	PRLR	prolactin receptor
243366_s_at	7.18e-12	1.75e-13	9.81165	20.4526	3.14854	3.14854	ITGA4	integrin subunit alpha 4
213566_at	1.73e-14	1.45e-16	11.9134	27.4813	3.14765	3.14765	RNASE6	ribonuclease A family member k6
226846_at	1.64e-13	2.22e-15	-11.0856	24.7795	-3.14759	3.14759	PHYHD1	phytanoyl-CoA dioxygenase domain containing 1
241118_at	2.62e-07	2.63e-08	6.53125	8.65284	3.14744	3.14744	LINC00462	long intergenic non-protein coding RNA 462
239964_at	8.61e-11	3.02e-12	-9.00837	17.6295	-3.14722	3.14722	TCL6	T-cell leukemia/lymphoma 6 (non-protein coding)
227174_at	1.45e-09	7.6e-11	-8.11843	14.4341	-3.14479	3.14479	WDR72	WD repeat domain 72
231275_at	6.3e-09	3.99e-10	-7.66608	12.7908	-3.14447	3.14447	LINC00982	long intergenic non-protein coding RNA 982
230261_at	9.76e-14	1.2e-15	11.2715	25.3941	3.1441	3.1441	ST8SIA4	ST8 alpha-N-acetyl-neuraminide alpha-2,8-sialyltransferase 4
202503_s_at	5.13e-14	5.55e-16	11.5034	26.1542	3.14405	3.14405	KIAA0101	KIAA0101
236407_at	1.06e-12	1.93e-14	-10.448	22.6386	-3.13325	3.13325	KCNE1	potassium voltage-gated channel subfamily E regulatory subunit 1
1555759_a_at	3.87e-11	1.21e-12	9.26486	18.538	3.13271	3.13271	CCL5	C-C motif chemokine ligand 5
206991_s_at	8.6e-14	1.02e-15	11.3203	25.5547	3.12936	3.12936	CCR5	C-C motif chemokine receptor 5 (gene/pseudogene)
210408_s_at	2.05e-08	1.5e-09	-7.30783	11.4844	-3.12813	3.12813	CPNE6	copine 6
242269_at	2.82e-14	2.68e-16	-11.7252	26.8747	-3.12442	3.12442	LINC00982	long intergenic non-protein coding RNA 982
228035_at	2.47e-08	1.84e-09	-7.25135	11.2783	-3.1232	3.1232	STK33	serine/threonine kinase 33
214511_x_at	1.3e-14	1.02e-16	12.0227	27.831	3.12275	3.12275	FCGR1B	Fc fragment of IgG receptor Ib
224189_x_at	3.3e-11	1.02e-12	-9.31378	18.7106	-3.12253	3.12253	EHF	ETS homologous factor
209603_at	5.25e-09	3.26e-10	-7.72115	12.9913	-3.12234	3.12234	GATA3	GATA binding protein 3
221662_s_at	1.17e-15	5.27e-18	-12.957	30.7575	-3.1219	3.1219	SLC22A7	solute carrier family 22 member 7
205472_s_at	1.41e-10	5.33e-12	-8.85043	17.067	-3.12137	3.12137	DACH1	dachshund family transcription factor 1
211917_s_at	1.86e-09	1e-10	-8.04222	14.1579	-3.11932	3.11932	PRLR	prolactin receptor
230238_at	2.1e-10	8.37e-12	-8.7252	16.6194	-3.11819	3.11819	SOWAHA	sosondowah ankyrin repeat domain family member A
243276_at	1.59e-11	4.45e-13	-9.54664	19.5286	-3.11751	3.11751	ALS2CL	ALS2 C-terminal like
218839_at	1.33e-11	3.59e-13	9.60725	19.7406	3.11283	3.11283	HEY1	hes related family bHLH transcription factor with YRPW motif 1
206119_at	6.58e-07	7.36e-08	-6.25176	7.63944	-3.10815	3.10815	BHMT	betaine--homocysteine S-methyltransferase
206955_at	7.25e-11	2.47e-12	-9.06529	17.8316	-3.10715	3.10715	LOC101930168///LOC100509620///AQP7	putative aquaporin-7-like protein 3///putative aquaporin-7-like protein 3///aquaporin 7
206666_at	3.54e-09	2.08e-10	7.84359	13.4368	3.10687	3.10687	GZMK	granzyme K
232422_at	1.2e-12	2.24e-14	-10.4048	22.4919	-3.10537	3.10537	GGACT	gamma-glutamylamine cyclotransferase
204122_at	1.12e-17	1.08e-20	15.0356	36.8553	3.10316	3.10316	TYROBP	TYRO protein tyrosine kinase binding protein
202207_at	1.42e-12	2.73e-14	10.3472	22.2957	3.10215	3.10215	ARL4C	ADP ribosylation factor like GTPase 4C
232361_s_at	7.48e-09	4.86e-10	-7.61262	12.5961	-3.10136	3.10136	EHF	ETS homologous factor
212464_s_at	8.88e-16	3.87e-18	13.0567	31.0629	3.10032	3.10032	FN1	fibronectin 1
1558290_a_at	8.87e-18	7.14e-21	15.1799	37.2579	3.09987	3.09987	MIR1204///PVT1	microRNA 1204///Pvt1 oncogene (non-protein coding)
206065_s_at	6.41e-08	5.44e-09	-6.95803	10.2076	-3.09964	3.09964	DPYS	dihydropyrimidinase
209591_s_at	2.61e-11	7.76e-13	-9.38957	18.9775	-3.099	3.099	BMP7	bone morphogenetic protein 7
202992_at	1.32e-09	6.78e-11	-8.1497	14.5473	-3.09785	3.09785	C7	complement component 7
244370_at	2.31e-07	2.29e-08	-6.5694	8.79155	-3.09653	3.09653	KIAA2022	KIAA2022
1555349_a_at	2.46e-16	7.03e-19	13.6135	32.7444	3.096	3.096	ITGB2	integrin subunit beta 2
215807_s_at	4.97e-12	1.15e-13	-9.93225	20.8705	-3.0941	3.0941	PLXNB1	plexin B1
210944_s_at	2.45e-15	1.29e-17	-12.6703	29.872	-3.09319	3.09319	CAPN3	calpain 3
202902_s_at	7.62e-16	3.22e-18	13.1157	31.2431	3.09221	3.09221	CTSS	cathepsin S
202921_s_at	5.05e-12	1.17e-13	-9.92738	20.8537	-3.08804	3.08804	ANK2	ankyrin 2, neuronal
238750_at	3.19e-11	9.74e-13	9.32551	18.7519	3.08752	3.08752	CCL28	C-C motif chemokine ligand 28
204641_at	2.29e-10	9.3e-12	8.69612	16.5153	3.08704	3.08704	NEK2	NIMA related kinase 2
232231_at	2.49e-13	3.59e-15	10.9427	24.3042	3.08677	3.08677	RUNX2	runt related transcription factor 2
223821_s_at	4.04e-09	2.42e-10	-7.80238	13.2869	-3.08662	3.08662	SUSD4	sushi domain containing 4
210065_s_at	5.02e-08	4.12e-09	-7.03373	10.4839	-3.08619	3.08619	UPK1B	uroplakin 1B
204446_s_at	7.49e-14	8.63e-16	11.3699	25.7174	3.08585	3.08585	ALOX5	arachidonate 5-lipoxygenase
220075_s_at	8.12e-05	1.61e-05	-4.74977	2.36498	-3.08469	3.08469	CDHR5	cadherin related family member 5
219949_at	7.7e-11	2.64e-12	-9.04565	17.7619	-3.08464	3.08464	LRRC2	leucine rich repeat containing 2
209696_at	1.22e-13	1.56e-15	-11.1921	25.1321	-3.0838	3.0838	FBP1	fructose-bisphosphatase 1
230130_at	2.04e-11	5.89e-13	-9.46761	19.2516	-3.0813	3.0813	SLIT2	slit guidance ligand 2
209602_s_at	2.07e-10	8.25e-12	-8.72921	16.6338	-3.08081	3.08081	GATA3	GATA binding protein 3
219666_at	2.81e-16	8.33e-19	13.5575	32.5771	3.07516	3.07516	MS4A6A	membrane spanning 4-domains A6A
1559400_s_at	1.37e-11	3.75e-13	-9.59534	19.699	-3.07511	3.07511	PAPPA	pappalysin 1
201818_at	2.36e-15	1.2e-17	12.6932	29.9431	3.07088	3.07088	LPCAT1	lysophosphatidylcholine acyltransferase 1
224485_s_at	3.48e-10	1.5e-11	-8.56432	16.0426	-3.06963	3.06963	SLC30A2	solute carrier family 30 member 2
207016_s_at	1.52e-10	5.8e-12	-8.82707	16.9836	-3.06934	3.06934	LOC101928635///ALDH1A2	uncharacterized LOC101928635///aldehyde dehydrogenase 1 family member A2
1556156_at	7.27e-12	1.78e-13	-9.80757	20.4385	-3.06898	3.06898	ESRRB	estrogen related receptor beta
209083_at	1.61e-14	1.33e-16	11.9404	27.5676	3.06658	3.06658	CORO1A	coronin 1A
204198_s_at	9.63e-11	3.43e-12	8.97346	17.5053	3.06168	3.06168	RUNX3	runt related transcription factor 3
232245_at	2.16e-08	1.59e-09	-7.29107	11.4232	-3.06024	3.06024	SLC25A34	solute carrier family 25 member 34
223732_at	1.12e-11	2.92e-13	-9.66582	19.9451	-3.05854	3.05854	SLC23A1	solute carrier family 23 member 1
1552256_a_at	7.26e-13	1.24e-14	10.5773	23.0769	3.05569	3.05569	SCARB1	scavenger receptor class B member 1
203409_at	6.4e-18	4.01e-21	15.384	37.8231	3.05557	3.05557	DDB2	damage specific DNA binding protein 2
236034_at	6.21e-10	2.89e-11	8.38312	15.3906	3.05062	3.05062	ANGPT2	angiopoietin 2
204931_at	1.49e-10	5.65e-12	-8.83411	17.0087	-3.05005	3.05005	TCF21	transcription factor 21
213362_at	1.89e-11	5.39e-13	-9.49226	19.3381	-3.04553	3.04553	PTPRD	protein tyrosine phosphatase, receptor type D
210054_at	1.33e-13	1.73e-15	11.1605	25.0277	0.995959	0.995959	HAUS3	HAUS augmin like complex subunit 3
209604_s_at	8.43e-13	1.47e-14	-10.5267	22.9058	-3.04448	3.04448	GATA3	GATA binding protein 3
204836_at	1.08e-12	1.97e-14	-10.4427	22.6207	-3.04213	3.04213	GLDC	glycine decarboxylase
216950_s_at	1.21e-15	5.52e-18	12.9417	30.7106	3.03964	3.03964	FCGR1CP///FCGR1B///FCGR1A	Fc fragment of IgG receptor Ic, pseudogene///Fc fragment of IgG receptor Ib///Fc fragment of IgG receptor Ia
204655_at	7.16e-12	1.75e-13	9.81261	20.456	3.03885	3.03885	CCL5	C-C motif chemokine ligand 5
205597_at	2.29e-08	1.7e-09	-7.2738	11.3602	-3.03872	3.03872	SLC44A4	solute carrier family 44 member 4
228776_at	3.37e-14	3.34e-16	11.6574	26.6554	3.03748	3.03748	GJC1	gap junction protein gamma 1
203819_s_at	5.1e-05	9.54e-06	4.90021	2.87316	3.03603	3.03603	IGF2BP3	insulin like growth factor 2 mRNA binding protein 3
200831_s_at	2.1e-12	4.29e-14	10.2161	21.8477	3.03443	3.03443	SCD	stearoyl-CoA desaturase
1555728_a_at	9.32e-14	1.13e-15	11.2886	25.4502	3.03208	3.03208	MS4A4A	membrane spanning 4-domains A4A
210085_s_at	1.54e-12	2.99e-14	-10.3203	22.2039	-3.03143	3.03143	ANXA9	annexin A9
207414_s_at	3.16e-09	1.83e-10	7.8787	13.5644	3.03111	3.03111	LOC100507472///PCSK6	uncharacterized LOC100507472///proprotein convertase subtilisin/kexin type 6
213640_s_at	1.3e-07	1.2e-08	6.74327	9.42449	3.03106	3.03106	LOX	lysyl oxidase
205757_at	3.56e-14	3.58e-16	-11.6364	26.587	-3.03098	3.03098	ENTPD5	ectonucleoside triphosphate diphosphohydrolase 5
210052_s_at	4.6e-12	1.05e-13	9.95923	20.9638	3.02661	3.02661	TPX2	TPX2, microtubule nucleation factor
237736_at	7.46e-15	5.14e-17	-12.2351	28.5067	-3.02557	3.02557	BSND	barttin CLCNK type accessory beta subunit
207697_x_at	6.93e-13	1.18e-14	10.5927	23.1289	3.02441	3.02441	LILRB2	leukocyte immunoglobulin like receptor B2
227202_at	3.74e-08	2.95e-09	-7.12433	10.8146	-3.02288	3.02288	CNTN1	contactin 1
231154_x_at	1.67e-06	2.09e-07	-5.96727	6.61439	-3.02153	3.02153	TINAG	tubulointerstitial nephritis antigen
205364_at	1.19e-10	4.39e-12	-8.90454	17.2599	-3.02071	3.02071	ACOX2	acyl-CoA oxidase 2
201037_at	1.17e-16	2.47e-19	13.9614	33.7743	3.01929	3.01929	PFKP	phosphofructokinase, platelet
240192_at	3.3e-09	1.92e-10	-7.86564	13.5169	-3.01826	3.01826	GATA3-AS1	GATA3 antisense RNA 1
221566_s_at	6.06e-14	6.68e-16	11.4473	25.971	3.01528	3.01528	NOL3	nucleolar protein 3
209220_at	5.32e-16	1.96e-18	-13.2774	31.7345	-3.0149	3.0149	GPC3	glypican 3
219850_s_at	5.98e-10	2.77e-11	-8.39547	15.4351	-3.014	3.014	EHF	ETS homologous factor
222257_s_at	4.36e-06	6.13e-07	-5.67089	5.55608	-3.01145	3.01145	ACE2	angiotensin I converting enzyme 2
230741_at	6.28e-18	3.67e-21	15.4159	37.9109	3.01132	3.01132	P2RX7	purinergic receptor P2X 7
1557176_a_at	1.9e-11	5.42e-13	-9.49074	19.3328	-3.00986	3.00986	C14orf37	chromosome 14 open reading frame 37
207299_s_at	3.17e-10	1.34e-11	-8.59447	16.1509	-3.00898	3.00898	GRM1	glutamate metabotropic receptor 1
1552281_at	8.99e-11	3.17e-12	-8.99536	17.5832	-3.0088	3.0088	SLC39A5	solute carrier family 39 member 5
206930_at	5.42e-08	4.5e-09	-7.00978	10.3964	-3.00749	3.00749	GLYAT	glycine-N-acyltransferase
1562587_at	1.06e-10	3.83e-12	-8.94275	17.396	-3.00704	3.00704	CLNK	cytokine dependent hematopoietic cell linker
205413_at	3.52e-12	7.77e-14	-10.0447	21.2586	-3.00602	3.00602	MPPED2	metallophosphoesterase domain containing 2
203324_s_at	6.55e-17	1.26e-19	14.1885	34.438	3.00542	3.00542	CAV2	caveolin 2
223062_s_at	2.23e-10	8.98e-12	-8.70576	16.5498	-3.0045	3.0045	PSAT1	phosphoserine aminotransferase 1
204913_s_at	3.01e-07	3.08e-08	6.48842	8.49724	3.0034	3.0034	SOX11	SRY-box 11
230078_at	1.8e-13	2.48e-15	11.0525	24.6697	0.945345	0.945345	RAPGEF6	Rap guanine nucleotide exchange factor 6
218952_at	2.68e-10	1.11e-11	-8.64707	16.3395	-2.99566	2.99566	PCSK1N	proprotein convertase subtilisin/kexin type 1 inhibitor
209823_x_at	2.41e-11	7.07e-13	9.41581	19.0697	2.99533	2.99533	LOC101060835///HLA-DQB1	HLA class II histocompatibility antigen, DQ beta 1 chain-like///major histocompatibility complex, class II, DQ beta 1
206503_x_at	3.01e-14	2.9e-16	11.7006	26.7951	2.99427	2.99427	PML	promyelocytic leukemia
230493_at	7.39e-10	3.52e-11	-8.32936	15.1967	-2.99017	2.99017	SHISA2	shisa family member 2
222372_at	3.9e-09	2.32e-10	-7.81345	13.3272	-2.98815	2.98815	MAGI1	membrane associated guanylate kinase, WW and PDZ domain containing 1
219607_s_at	1.15e-12	2.13e-14	10.4197	22.5425	2.9877	2.9877	MS4A4A	membrane spanning 4-domains A4A
222930_s_at	2.03e-11	5.82e-13	-9.47094	19.2633	-2.98524	2.98524	AGMAT	agmatinase
231773_at	4.53e-08	3.66e-09	-7.06572	10.6006	-2.98484	2.98484	ANGPTL1	angiopoietin like 1
210289_at	9.59e-06	1.49e-06	-5.42514	4.68819	-2.98403	2.98403	NAT8B///NAT8	N-acetyltransferase 8B (putative, gene/pseudogene)///N-acetyltransferase 8 (putative)
214602_at	1.19e-08	8.13e-10	-7.47313	12.0876	-2.984	2.984	COL4A4	collagen type IV alpha 4 chain
205780_at	4.33e-13	6.94e-15	-10.748	23.6523	-2.98303	2.98303	BIK	BCL2 interacting killer
205778_at	4.13e-11	1.3e-12	-9.24369	18.4633	-2.98259	2.98259	KLK7	kallikrein related peptidase 7
1553423_a_at	2.27e-09	1.26e-10	7.9807	13.9348	2.98242	2.98242	SLFN13	schlafen family member 13
202499_s_at	4.39e-09	2.66e-10	7.77613	13.1914	2.98119	2.98119	SLC2A3	solute carrier family 2 member 3
204882_at	1.41e-10	5.33e-12	8.8505	17.0672	2.98084	2.98084	ARHGAP25	Rho GTPase activating protein 25
231416_at	1.7e-09	9.11e-11	-8.06879	14.2543	-2.97783	2.97783	DHDH	dihydrodiol dehydrogenase
219719_at	5.06e-10	2.28e-11	8.44917	15.6285	2.97742	2.97742	HIGD1B	HIG1 hypoxia inducible domain family member 1B
228563_at	6.11e-09	3.86e-10	7.67558	12.8254	2.9742	2.9742	GJC1	gap junction protein gamma 1
231213_at	5.04e-09	3.11e-10	-7.73395	13.0379	-2.97136	2.97136	PDE1A	phosphodiesterase 1A
209981_at	6.23e-11	2.06e-12	-9.11486	18.0074	-2.96754	2.96754	CSDC2	cold shock domain containing C2
228504_at	1.78e-12	3.52e-14	-10.2737	22.0448	-2.96622	2.96622	SCN7A	sodium voltage-gated channel alpha subunit 7
216452_at	5.03e-10	2.26e-11	-8.45076	15.6342	-2.96514	2.96514	TRPM3	transient receptor potential cation channel subfamily M member 3
216442_x_at	2.89e-14	2.76e-16	11.7163	26.8461	2.96456	2.96456	FN1	fibronectin 1
219619_at	6.3e-07	7.01e-08	6.26487	7.68687	2.96429	2.96429	DIRAS2	DIRAS family GTPase 2
210326_at	2.82e-08	2.15e-09	-7.20982	11.1267	-2.96058	2.96058	AGXT	alanine-glyoxylate aminotransferase
244119_at	6.27e-08	5.3e-09	-6.96507	10.2333	-2.95992	2.95992	LINC00551	long intergenic non-protein coding RNA 551
200022_at	2.41e-13	3.46e-15	10.9544	24.3433	0.982989	0.982989	RPL18	ribosomal protein L18
220066_at	9.89e-12	2.53e-13	9.70647	20.0868	2.95951	2.95951	NOD2	nucleotide binding oligomerization domain containing 2
213933_at	5.03e-10	2.26e-11	-8.45059	15.6336	-2.95871	2.95871	PTGER3	prostaglandin E receptor 3
215813_s_at	1.51e-10	5.75e-12	8.8292	16.9912	2.95867	2.95867	PTGS1	prostaglandin-endoperoxide synthase 1
206067_s_at	6.54e-06	9.64e-07	-5.54543	5.1118	-2.95668	2.95668	WT1	Wilms tumor 1
216699_s_at	2.33e-12	4.83e-14	-10.1815	21.729	-2.95557	2.95557	KLK1	kallikrein 1
230912_at	7.89e-11	2.71e-12	-9.03855	17.7367	-2.95456	2.95456	ASPDH	aspartate dehydrogenase domain containing
239093_at	1.45e-13	1.93e-15	-11.1275	24.9185	-2.95405	2.95405	HOGA1	4-hydroxy-2-oxoglutarate aldolase 1
232278_s_at	2.67e-07	2.69e-08	6.52559	8.63228	2.95218	2.95218	DEPDC1	DEP domain containing 1
208374_s_at	2.52e-13	3.64e-15	10.9388	24.2911	0.935873	0.935873	CAPZA1	capping actin protein of muscle Z-line alpha subunit 1
214770_at	3.18e-17	4.41e-20	14.5459	35.4692	2.94753	2.94753	MSR1	macrophage scavenger receptor 1
213052_at	2.61e-13	3.79e-15	-10.9271	24.2522	-0.842108	0.842108	PRKAR2A	protein kinase cAMP-dependent type II regulatory subunit alpha
206925_at	1.06e-10	3.83e-12	8.94269	17.3958	2.94751	2.94751	ST8SIA4	ST8 alpha-N-acetyl-neuraminide alpha-2,8-sialyltransferase 4
233986_s_at	8.62e-13	1.51e-14	10.519	22.8795	2.94553	2.94553	PLEKHG2	pleckstrin homology and RhoGEF domain containing G2
228502_at	1.61e-09	8.57e-11	-8.08538	14.3144	-2.94094	2.94094	RPS6KA6	ribosomal protein S6 kinase A6
214978_s_at	3.12e-07	3.21e-08	6.47766	8.45814	2.94072	2.94072	PPFIA4	PTPRF interacting protein alpha 4
205934_at	1.14e-14	8.8e-17	-12.0682	27.9762	-2.93872	2.93872	PLCL1	phospholipase C like 1
229313_at	4.99e-10	2.24e-11	-8.45335	15.6435	-2.93856	2.93856	ANO5	anoctamin 5
231540_at	1.85e-11	5.25e-13	-9.49976	19.3644	-2.93851	2.93851	LOC100130691	uncharacterized LOC100130691
202803_s_at	2.42e-17	3.24e-20	14.6524	35.7732	2.93834	2.93834	ITGB2	integrin subunit beta 2
241914_s_at	1.95e-07	1.89e-08	-6.62112	8.97969	-2.93781	2.93781	ACSM2B///ACSM2A	acyl-CoA synthetase medium-chain family member 2B///acyl-CoA synthetase medium-chain family member 2A
212671_s_at	1.89e-14	1.62e-16	11.8789	27.3704	2.93715	2.93715	LOC100509457///HLA-DQA2///HLA-DQA1	HLA class II histocompatibility antigen, DQ alpha 1 chain-like///major histocompatibility complex, class II, DQ alpha 2///major histocompatibility complex, class II, DQ alpha 1
224412_s_at	2.89e-09	1.65e-10	-7.9062	13.6643	-2.93642	2.93642	TRPM6	transient receptor potential cation channel subfamily M member 6
230964_at	8.77e-10	4.29e-11	-8.27527	15.0014	-2.93601	2.93601	FREM2	FRAS1 related extracellular matrix protein 2
237737_at	3.95e-06	5.48e-07	5.70178	5.66584	2.93552	2.93552	LOC101927345///LOC101060632///LOC101059949///ANKRD20A12P	putative ankyrin repeat domain-containing protein 20A12 pseudogene///uncharacterized gene LOC101060632///putative ankyrin repeat domain-containing protein 20A12 pseudogene///ankyrin repeat domain 20 family member A12, pseudogene
211919_s_at	3.79e-16	1.22e-18	13.4322	32.2016	2.93471	2.93471	CXCR4	C-X-C motif chemokine receptor 4
200834_s_at	2.83e-13	4.18e-15	10.8982	24.1557	0.920371	0.920371	RPS21	ribosomal protein S21
210049_at	1.7e-08	1.21e-09	-7.36515	11.6936	-2.93413	2.93413	SERPINC1	serpin family C member 1
211719_x_at	1.59e-14	1.3e-16	11.9468	27.5883	2.93278	2.93278	FN1	fibronectin 1
232067_at	8.87e-07	1.03e-07	-6.16102	7.31166	-2.92903	2.92903	FAXC	failed axon connections homolog
229476_s_at	2.57e-08	1.93e-09	-7.23866	11.2319	-2.9289	2.9289	THRSP	thyroid hormone responsive
239765_at	2.64e-12	5.59e-14	-10.1397	21.5854	-2.92698	2.92698	CPEB3	cytoplasmic polyadenylation element binding protein 3
213651_at	3.71e-13	5.75e-15	-10.8034	23.8383	-2.92496	2.92496	INPP5J	inositol polyphosphate-5-phosphatase J
229796_at	8.61e-13	1.51e-14	-10.5196	22.8816	-2.92433	2.92433	SIX4	SIX homeobox 4
235964_x_at	4.8e-14	5.11e-16	11.528	26.2347	2.92385	2.92385	SAMHD1	SAM and HD domain containing deoxynucleoside triphosphate triphosphohydrolase 1
228394_at	3.35e-10	1.43e-11	8.57653	16.0865	2.92173	2.92173	STK10	serine/threonine kinase 10
240807_at	6.42e-11	2.14e-12	-9.10498	17.9724	-2.92168	2.92168	LINC01187	long intergenic non-protein coding RNA 1187
211796_s_at	5.35e-11	1.74e-12	9.16342	18.1794	2.9216	2.9216	TRBC1	T cell receptor beta constant 1
205229_s_at	3.03e-09	1.74e-10	-7.89222	13.6135	-2.92136	2.92136	COCH	cochlin
226281_at	5.39e-09	3.35e-10	-7.7136	12.9638	-2.92126	2.92126	DNER	delta/notch like EGF repeat containing
218918_at	7.03e-15	4.7e-17	-12.2635	28.5966	-2.9197	2.9197	MAN1C1	mannosidase alpha class 1C member 1
237030_at	5.44e-11	1.77e-12	-9.15776	18.1594	-2.91841	2.91841	ACPP	acid phosphatase, prostate
207063_at	0.000594	0.00015	-4.08617	0.206532	-2.91777	2.91777	TTTY14	testis-specific transcript, Y-linked 14 (non-protein coding)
219773_at	4.17e-14	4.28e-16	-11.582	26.4104	-2.91696	2.91696	NOX4	NADPH oxidase 4
221305_s_at	2.24e-05	3.82e-06	-5.16016	3.76456	-2.91595	2.91595	UGT1A3///UGT1A1///UGT1A9///UGT1A5///UGT1A8	UDP glucuronosyltransferase family 1 member A3///UDP glucuronosyltransferase family 1 member A1///UDP glucuronosyltransferase family 1 member A9///UDP glucuronosyltransferase family 1 member A5///UDP glucuronosyltransferase family 1 member A8
232760_at	3.82e-05	6.93e-06	4.99178	3.18532	2.91585	2.91585	TEX15	testis expressed 15
229485_x_at	2.85e-11	8.59e-13	-9.3609	18.8766	-2.91383	2.91383	SHISA3	shisa family member 3
1555203_s_at	1.01e-06	1.19e-07	-6.1211	7.16772	-2.90901	2.90901	SLC44A4	solute carrier family 44 member 4
202498_s_at	7.56e-11	2.59e-12	9.0515	17.7827	2.90849	2.90849	SLC2A3	solute carrier family 2 member 3
221023_s_at	9.46e-11	3.36e-12	-8.97877	17.5242	-2.90818	2.90818	KCNH6	potassium voltage-gated channel subfamily H member 6
207238_s_at	4.78e-16	1.66e-18	13.3319	31.8993	2.90571	2.90571	PTPRC	protein tyrosine phosphatase, receptor type C
229797_at	6.78e-10	3.2e-11	-8.35565	15.2915	-2.90192	2.90192	MCOLN3	mucolipin 3
214324_at	1.35e-08	9.34e-10	-7.43543	11.95	-2.89896	2.89896	GP2	glycoprotein 2
206269_at	3.87e-09	2.3e-10	-7.81573	13.3355	-2.89833	2.89833	GCM1	glial cells missing homolog 1
219738_s_at	1.18e-08	8.04e-10	-7.47607	12.0983	-2.89653	2.89653	PCDH9	protocadherin 9
204260_at	9.18e-11	3.25e-12	-8.98814	17.5575	-2.89484	2.89484	CHGB	chromogranin B
211885_x_at	1.66e-09	8.8e-11	-8.07824	14.2885	-2.89476	2.89476	FUT6	fucosyltransferase 6
206410_at	3.32e-10	1.42e-11	-8.57947	16.097	-2.89281	2.89281	NR0B2	nuclear receptor subfamily 0 group B member 2
223806_s_at	2.28e-10	9.22e-12	-8.69859	16.5242	-2.89228	2.89228	NAPSA	napsin A aspartic peptidase
213992_at	2.26e-13	3.2e-15	-10.9771	24.4188	-2.8902	2.8902	COL4A6	collagen type IV alpha 6 chain
226743_at	5.47e-16	2.09e-18	13.2561	31.6698	2.88904	2.88904	SLFN11	schlafen family member 11
241483_at	1.21e-10	4.48e-12	-8.89876	17.2393	-2.88728	2.88728	CLNK	cytokine dependent hematopoietic cell linker
235202_x_at	7.18e-11	2.44e-12	9.06859	17.8433	2.88595	2.88595	IKBIP	IKBKB interacting protein
204961_s_at	6.49e-14	7.28e-16	11.4211	25.8854	2.88572	2.88572	NCF1C///NCF1B///NCF1	neutrophil cytosolic factor 1C pseudogene///neutrophil cytosolic factor 1B pseudogene///neutrophil cytosolic factor 1
230472_at	1.36e-11	3.71e-13	-9.59817	19.7089	-2.88557	2.88557	IRX1	iroquois homeobox 1
205128_x_at	1.64e-10	6.34e-12	8.80231	16.8952	2.88483	2.88483	PTGS1	prostaglandin-endoperoxide synthase 1
204951_at	6.75e-12	1.62e-13	9.83366	20.529	2.88444	2.88444	RHOH	ras homolog family member H
236220_at	8.13e-12	2.03e-13	-9.76993	20.3076	-2.88436	2.88436	SLC16A10	solute carrier family 16 member 10
231358_at	1.2e-11	3.18e-13	-9.64195	19.8618	-2.88295	2.88295	MRO	maestro
209773_s_at	2.82e-11	8.49e-13	9.36435	18.8887	2.88251	2.88251	RRM2	ribonucleotide reductase regulatory subunit M2
214999_s_at	1.43e-11	3.94e-13	-9.58137	19.6501	-2.88223	2.88223	RAB11FIP3	RAB11 family interacting protein 3
219142_at	2.74e-15	1.49e-17	-12.6243	29.7289	-2.88127	2.88127	RASL11B	RAS like family 11 member B
228915_at	3.17e-11	9.68e-13	-9.32743	18.7587	-2.88006	2.88006	DACH1	dachshund family transcription factor 1
223507_at	3.94e-13	6.19e-15	-10.7816	23.7653	-0.736905	0.736905	CLPX	caseinolytic mitochondrial matrix peptidase chaperone subunit
204653_at	6.63e-10	3.12e-11	-8.36222	15.3152	-2.87667	2.87667	TFAP2A	transcription factor AP-2 alpha
244111_at	9.4e-07	1.1e-07	-6.14261	7.24527	-2.87637	2.87637	KRT222	keratin 222
209671_x_at	1.22e-07	1.12e-08	6.76383	9.4994	2.87287	2.87287	TRAC	T-cell receptor alpha constant
205258_at	5.19e-09	3.22e-10	7.72475	13.0044	2.8723	2.8723	INHBB	inhibin beta B subunit
204534_at	7.98e-08	6.92e-09	-6.89293	9.9701	-2.8715	2.8715	SEBOX///VTN	SEBOX homeobox///vitronectin
207076_s_at	1.79e-13	2.45e-15	-11.0565	24.6829	-2.86951	2.86951	ASS1	argininosuccinate synthase 1
210163_at	1.33e-09	6.85e-11	8.14692	14.5373	2.86888	2.86888	CXCL11	C-X-C motif chemokine ligand 11
204103_at	7.53e-10	3.6e-11	8.32334	15.1749	2.86727	2.86727	CCL4	C-C motif chemokine ligand 4
206876_at	9.78e-10	4.85e-11	-8.24123	14.8784	-2.86644	2.86644	SIM1	single-minded family bHLH transcription factor 1
219519_s_at	1.77e-09	9.52e-11	8.05675	14.2106	2.86561	2.86561	SIGLEC1	sialic acid binding Ig like lectin 1
203066_at	1.93e-14	1.67e-16	11.8696	27.3406	2.86472	2.86472	CHST15	carbohydrate (N-acetylgalactosamine 4-sulfate 6-O) sulfotransferase 15
231260_at	3.29e-10	1.41e-11	-8.58208	16.1064	-2.86458	2.86458	ZNF582-AS1	ZNF582 antisense RNA 1 (head to head)
220727_at	2.13e-15	1.07e-17	-12.7292	30.0547	-2.86401	2.86401	KCNK10	potassium two pore domain channel subfamily K member 10
226311_at	1.72e-06	2.17e-07	5.95679	6.57679	2.86297	2.86297	ADAMTS2	ADAM metallopeptidase with thrombospondin type 1 motif 2
242579_at	6.03e-16	2.36e-18	-13.2162	31.5489	-2.86148	2.86148	BMPR1B	bone morphogenetic protein receptor type 1B
230966_at	3.51e-12	7.73e-14	10.0461	21.2635	2.86053	2.86053	IL4I1	interleukin 4 induced 1
219232_s_at	2.93e-09	1.68e-10	7.9015	13.6472	2.86039	2.86039	EGLN3	egl-9 family hypoxia inducible factor 3
230550_at	1.14e-13	1.44e-15	11.2155	25.2095	2.85921	2.85921	MS4A6A	membrane spanning 4-domains A6A
225081_s_at	1.69e-16	4.34e-19	13.7732	33.2193	2.85853	2.85853	CDCA7L	cell division cycle associated 7 like
219127_at	6.23e-11	2.06e-12	-9.1153	18.009	-2.85734	2.85734	PRR15L	proline rich 15 like
1552507_at	8.9e-10	4.35e-11	8.27087	14.9855	2.8571	2.8571	KCNE4	potassium voltage-gated channel subfamily E regulatory subunit 4
218663_at	2.42e-07	2.41e-08	6.55479	8.73841	2.85644	2.85644	NCAPG	non-SMC condensin I complex subunit G
218726_at	1.13e-07	1.02e-08	6.78698	9.58377	2.85641	2.85641	HJURP	Holliday junction recognition protein
210972_x_at	1.75e-09	9.39e-11	8.06043	14.2239	2.85617	2.85617	TRAC///TRAJ17///TRAV20///TRDV2	T-cell receptor alpha constant///T cell receptor alpha joining 17///T cell receptor alpha variable 20///T cell receptor delta variable 2
221795_at	8.85e-10	4.33e-11	-8.2727	14.9921	-2.85551	2.85551	NTRK2	neurotrophic receptor tyrosine kinase 2
240661_at	1.66e-10	6.4e-12	-8.79986	16.8864	-2.85526	2.85526	LOC100506459	uncharacterized LOC100506459
205044_at	4.55e-06	6.42e-07	-5.65793	5.51007	-2.85331	2.85331	GABRP	gamma-aminobutyric acid type A receptor pi subunit
1552757_s_at	1.36e-07	1.26e-08	-6.731	9.37975	-2.85088	2.85088	C9orf66	chromosome 9 open reading frame 66
214467_at	7.48e-12	1.84e-13	9.79821	20.4059	2.85025	2.85025	GPR65	G protein-coupled receptor 65
224428_s_at	6.91e-11	2.33e-12	9.08151	17.8892	2.84982	2.84982	CDCA7	cell division cycle associated 7
226018_at	3.77e-11	1.17e-12	-9.27287	18.5663	-2.84903	2.84903	MTURN	maturin, neural progenitor differentiation regulator homolog (Xenopus)
208980_s_at	4.96e-13	8.09e-15	10.7028	23.5003	0.875826	0.875826	UBC	ubiquitin C
230554_at	2.43e-06	3.18e-07	-5.85171	6.20043	-2.84829	2.84829	ACSM2A	acyl-CoA synthetase medium-chain family member 2A
210340_s_at	2.86e-11	8.63e-13	9.3597	18.8723	2.84772	2.84772	CSF2RA	colony stimulating factor 2 receptor alpha subunit
206964_at	3.82e-08	3.01e-09	-7.11821	10.7922	-2.84653	2.84653	NAT8B	N-acetyltransferase 8B (putative, gene/pseudogene)
233498_at	4.43e-13	7.12e-15	-10.7406	23.6276	-2.84648	2.84648	ERBB4	erb-b2 receptor tyrosine kinase 4
206517_at	1.9e-08	1.38e-09	-7.32984	11.5648	-2.84489	2.84489	CDH16	cadherin 16
203923_s_at	1.53e-16	3.69e-19	13.8268	33.3779	2.84293	2.84293	CYBB	cytochrome b-245 beta chain
206060_s_at	1.15e-09	5.84e-11	8.19041	14.6946	2.84151	2.84151	PTPN22	protein tyrosine phosphatase, non-receptor type 22
210287_s_at	1.03e-07	9.18e-09	6.8165	9.69139	2.83902	2.83902	FLT1	fms related tyrosine kinase 1
221520_s_at	8.73e-09	5.78e-10	7.56589	12.4258	2.83899	2.83899	CDCA8	cell division cycle associated 8
211844_s_at	5.02e-09	3.09e-10	7.73544	13.0434	2.83896	2.83896	NRP2	neuropilin 2
223381_at	8.31e-08	7.23e-09	6.88113	9.92705	2.83587	2.83587	NUF2	NUF2, NDC80 kinetochore complex component
202619_s_at	6.43e-12	1.54e-13	9.84911	20.5826	2.83581	2.83581	PLOD2	procollagen-lysine,2-oxoglutarate 5-dioxygenase 2
210538_s_at	2.08e-13	2.92e-15	11.005	24.5116	2.83576	2.83576	BIRC3	baculoviral IAP repeat containing 3
200019_s_at	5.89e-13	9.8e-15	10.6466	23.3109	0.845336	0.845336	FAU	FAU, ubiquitin like and ribosomal protein S30 fusion
236234_at	3.91e-07	4.13e-08	-6.40892	8.20868	-2.83569	2.83569	PDE1A	phosphodiesterase 1A
241949_at	1.84e-08	1.33e-09	-7.34064	11.6042	-2.83471	2.83471	ACOT6	acyl-CoA thioesterase 6
206366_x_at	2.71e-10	1.13e-11	8.64324	16.3258	2.83416	2.83416	XCL1	X-C motif chemokine ligand 1
205363_at	3.06e-05	5.39e-06	-5.06278	3.42878	-2.83336	2.83336	BBOX1	gamma-butyrobetaine hydroxylase 1
1552846_s_at	1.8e-11	5.11e-13	9.5073	19.3908	2.83323	2.83323	RAB42	RAB42, member RAS oncogene family
205269_at	1.44e-15	6.82e-18	12.8741	30.5028	2.8332	2.8332	LCP2	lymphocyte cytosolic protein 2
229437_at	1.31e-10	4.9e-12	8.87409	17.1514	2.83263	2.83263	MIR155///MIR155HG	microRNA 155///MIR155 host gene
203820_s_at	1.64e-05	2.71e-06	5.25758	4.10252	2.83247	2.83247	IGF2BP3	insulin like growth factor 2 mRNA binding protein 3
212204_at	6.38e-13	1.07e-14	10.6205	23.223	0.961566	0.961566	TMEM87A	transmembrane protein 87A
204015_s_at	4.7e-11	1.51e-12	9.20248	18.3176	2.83237	2.83237	DUSP4	dual specificity phosphatase 4
1560119_at	9.49e-07	1.11e-07	-6.13996	7.23571	-2.8314	2.8314	LINC00937	long intergenic non-protein coding RNA 937
209955_s_at	4.21e-09	2.54e-10	7.78964	13.2406	2.8313	2.8313	FAP	fibroblast activation protein alpha
210495_x_at	2.12e-14	1.88e-16	11.8332	27.2234	2.83065	2.83065	FN1	fibronectin 1
205682_x_at	1.53e-10	5.83e-12	-8.82568	16.9786	-2.83044	2.83044	APOM	apolipoprotein M
1554406_a_at	4.93e-12	1.13e-13	9.93634	20.8847	2.82961	2.82961	CLEC7A	C-type lectin domain family 7 member A
223893_at	1.31e-08	9.07e-10	-7.44343	11.9792	-2.82934	2.82934	ENAM	enamelin
238575_at	7.2e-09	4.65e-10	-7.62466	12.64	-2.82919	2.82919	OSBPL6	oxysterol binding protein like 6
205343_at	1.08e-07	9.74e-09	-6.80066	9.63362	-2.82771	2.82771	SULT1C2	sulfotransferase family 1C member 2
203559_s_at	8.43e-06	1.28e-06	-5.46583	4.83119	-2.82753	2.82753	AOC1	amine oxidase, copper containing 1
217568_at	1.94e-09	1.06e-10	-8.02818	14.107	-2.82648	2.82648	EDDM3A	epididymal protein 3A
235751_s_at	2.01e-09	1.1e-10	8.01781	14.0694	2.8247	2.8247	VMO1	vitelline membrane outer layer 1 homolog
202800_at	2.02e-13	2.81e-15	11.0159	24.548	2.82387	2.82387	SLC1A3	solute carrier family 1 member 3
223488_s_at	1.19e-13	1.52e-15	11.1993	25.156	2.82326	2.82326	GNB4	G protein subunit beta 4
219987_at	7.11e-12	1.73e-13	-9.81553	20.4661	-2.82202	2.82202	ERVMER34-1	endogenous retrovirus group MER34 member 1
1555725_a_at	3.18e-07	3.28e-08	6.47182	8.43695	2.82178	2.82178	RGS5	regulator of G-protein signaling 5
237261_at	1.73e-08	1.23e-09	7.35995	11.6746	2.82066	2.82066	ANGPT2	angiopoietin 2
205350_at	3.93e-11	1.23e-12	-9.25954	18.5192	-2.82034	2.82034	CRABP1	cellular retinoic acid binding protein 1
223343_at	5.74e-15	3.69e-17	12.3388	28.8344	2.82008	2.82008	MS4A7	membrane spanning 4-domains A7
201153_s_at	7.51e-13	1.29e-14	10.5659	23.0385	0.880569	0.880569	MBNL1	muscleblind like splicing regulator 1
231018_at	6.79e-10	3.21e-11	-8.35499	15.2891	-2.8189	2.8189	PALM3	paralemmin 3
210476_s_at	3.6e-11	1.12e-12	-9.28657	18.6146	-2.81659	2.81659	PRLR	prolactin receptor
202206_at	2.91e-11	8.78e-13	9.35469	18.8547	2.81533	2.81533	ARL4C	ADP ribosylation factor like GTPase 4C
229535_at	7.72e-13	1.33e-14	-10.5568	23.0075	-0.911282	0.911282	PTPMT1	protein tyrosine phosphatase, mitochondrial 1
45297_at	5.86e-17	1.04e-19	14.2531	34.6257	2.81399	2.81399	EHD2	EH domain containing 2
202580_x_at	3.53e-08	2.77e-09	7.14143	10.877	2.81121	2.81121	FOXM1	forkhead box M1
204914_s_at	2.82e-06	3.76e-07	5.80579	6.03636	2.8095	2.8095	SOX11	SRY-box 11
204222_s_at	5.34e-16	1.97e-18	13.2747	31.7263	2.80632	2.80632	GLIPR1	GLI pathogenesis related 1
223895_s_at	1.06e-09	5.31e-11	-8.21636	14.7885	-2.80623	2.80623	EPN3	epsin 3
205666_at	3.93e-08	3.11e-09	-7.10946	10.7603	-2.80526	2.80526	FMO1	flavin containing monooxygenase 1
231930_at	1.68e-08	1.2e-09	-7.36814	11.7045	-2.80331	2.80331	LOC643923///ELMOD1	uncharacterized LOC643923///ELMO domain containing 1
234296_s_at	2.17e-05	3.68e-06	5.17079	3.80132	2.80307	2.80307	TEX11	testis expressed 11
1554842_at	2.37e-11	6.96e-13	-9.42028	19.0854	-2.80285	2.80285	SLC12A1	solute carrier family 12 member 1
211890_x_at	5.41e-12	1.26e-13	-9.90506	20.7764	-2.80175	2.80175	CAPN3	calpain 3
229954_at	3.34e-10	1.43e-11	-8.57732	16.0893	-2.8017	2.8017	CHDH	choline dehydrogenase
226452_at	1.04e-16	2.11e-19	14.0142	33.9293	2.80142	2.80142	PDK1	pyruvate dehydrogenase kinase 1
205569_at	2.54e-08	1.9e-09	7.24237	11.2455	2.80028	2.80028	LAMP3	lysosomal associated membrane protein 3
209480_at	0.00547	0.00187	3.27606	-2.18665	2.79969	2.79969	HLA-DQB1	major histocompatibility complex, class II, DQ beta 1
229039_at	1.3e-11	3.51e-13	-9.61402	19.7643	-2.79906	2.79906	SYN2	synapsin II
207007_at	1.11e-12	2.03e-14	-10.4334	22.5891	-2.79733	2.79733	NR1I3	nuclear receptor subfamily 1 group I member 3
207729_at	8.66e-10	4.22e-11	-8.27928	15.0159	-2.79722	2.79722	CDH9	cadherin 9
206866_at	9.38e-07	1.09e-07	6.14368	7.24913	2.79686	2.79686	CDH4	cadherin 4
209897_s_at	1.07e-12	1.95e-14	-10.4447	22.6274	-2.79432	2.79432	SLIT2	slit guidance ligand 2
215509_s_at	4.77e-08	3.89e-09	7.04925	10.5405	2.79422	2.79422	BUB1	BUB1 mitotic checkpoint serine/threonine kinase
205768_s_at	9.65e-11	3.44e-12	-8.97222	17.5009	-2.79354	2.79354	SLC27A2	solute carrier family 27 member 2
205769_at	1.15e-09	5.81e-11	-8.1917	14.6993	-2.78993	2.78993	SLC27A2	solute carrier family 27 member 2
235385_at	1.04e-14	7.79e-17	12.106	28.0966	2.78985	2.78985	2020-03-01	membrane associated ring-CH-type finger 1
236044_at	4.25e-13	6.77e-15	-10.7552	23.6764	-2.78978	2.78978	PLPP4	phospholipid phosphatase 4
1555758_a_at	5.13e-08	4.22e-09	7.02678	10.4585	2.78936	2.78936	CDKN3	cyclin dependent kinase inhibitor 3
231336_at	1.76e-10	6.86e-12	-8.7804	16.8168	-2.78893	2.78893	CPNE4	copine 4
202554_s_at	1.24e-11	3.33e-13	-9.62917	19.8172	-2.78776	2.78776	GSTM3	glutathione S-transferase mu 3
202497_x_at	8.93e-09	5.93e-10	7.55863	12.3993	2.78686	2.78686	SLC2A3	solute carrier family 2 member 3
233040_at	7.31e-08	6.29e-09	-6.91895	10.065	-2.78576	2.78576	PLEKHA5	pleckstrin homology domain containing A5
236313_at	3.47e-08	2.71e-09	7.14719	10.898	2.78199	2.78199	CDKN2B	cyclin dependent kinase inhibitor 2B
204971_at	6.74e-15	4.44e-17	12.281	28.6517	2.78175	2.78175	CSTA	cystatin A
237108_x_at	1.45e-13	1.92e-15	-11.1288	24.9228	-2.78108	2.78108	LINC00982	long intergenic non-protein coding RNA 982
206214_at	3e-08	2.3e-09	7.19101	11.058	2.78088	2.78088	PLA2G7	phospholipase A2 group VII
222848_at	4.77e-10	2.14e-11	8.4663	15.6902	2.78019	2.78019	CENPK	centromere protein K
219140_s_at	1.56e-06	1.94e-07	-5.98696	6.68506	-2.77991	2.77991	RBP4	retinol binding protein 4
220624_s_at	5.49e-07	6.03e-08	-6.30575	7.83481	-2.77978	2.77978	ELF5	E74 like ETS transcription factor 5
200975_at	9.61e-13	1.72e-14	10.481	22.7506	0.840979	0.840979	PPT1	palmitoyl-protein thioesterase 1
201721_s_at	6.49e-18	4.39e-21	15.3517	37.7341	2.77789	2.77789	LAPTM5	lysosomal protein transmembrane 5
229730_at	6.47e-07	7.23e-08	-6.25656	7.6568	-2.77689	2.77689	SMTNL2	smoothelin like 2
208965_s_at	8.42e-19	4.62e-23	17.0274	42.1898	2.77654	2.77654	IFI16	interferon gamma inducible protein 16
41220_at	9.82e-13	1.77e-14	10.4736	22.7256	0.997799	0.997799	2020-09-09	septin 9
213782_s_at	5.55e-07	6.1e-08	-6.30275	7.82393	-2.77624	2.77624	MYOZ2	myozenin 2
225302_at	9.87e-13	1.78e-14	10.4715	22.7185	0.893798	0.893798	TMX3	thioredoxin related transmembrane protein 3
223075_s_at	1.25e-09	6.35e-11	-8.16735	14.6112	-2.77592	2.77592	AIF1L	allograft inflammatory factor 1 like
244742_at	1.42e-07	1.33e-08	-6.7163	9.32622	-2.7753	2.7753	LOC101929036///PAH	uncharacterized LOC101929036///phenylalanine hydroxylase
214069_at	3.79e-07	3.99e-08	-6.4182	8.24235	-2.77247	2.77247	ACSM2B///ACSM2A	acyl-CoA synthetase medium-chain family member 2B///acyl-CoA synthetase medium-chain family member 2A
236741_at	8.58e-09	5.67e-10	-7.57072	12.4434	-2.77186	2.77186	WDR72	WD repeat domain 72
203438_at	6.95e-06	1.03e-06	5.52648	5.04489	2.76984	2.76984	STC2	stanniocalcin 2
231711_at	8.27e-09	5.45e-10	-7.58191	12.4841	-2.7695	2.7695	ACPP	acid phosphatase, prostate
228560_at	3.97e-07	4.21e-08	-6.40387	8.19036	-2.76947	2.76947	CHDH	choline dehydrogenase
209555_s_at	1.98e-07	1.92e-08	6.61658	8.96316	2.76934	2.76934	CD36	CD36 molecule
215465_at	1.65e-06	2.06e-07	5.97027	6.62515	2.76917	2.76917	ABCA12	ATP binding cassette subfamily A member 12
202202_s_at	1.42e-11	3.89e-13	9.58474	19.662	2.76859	2.76859	LAMA4	laminin subunit alpha 4
207691_x_at	5.02e-14	5.4e-16	11.5114	26.1803	2.76802	2.76802	ENTPD1	ectonucleoside triphosphate diphosphohydrolase 1
243708_at	2.46e-12	5.15e-14	-10.1633	21.6664	-2.76724	2.76724	TMEM132E	transmembrane protein 132E
206209_s_at	7.02e-08	6.02e-09	-6.93099	10.1089	-2.76635	2.76635	CA4	carbonic anhydrase 4
217466_x_at	3.71e-16	1.19e-18	13.4406	32.2268	2.76489	2.76489	SNORA64///RPS2	small nucleolar RNA, H/ACA box 64///ribosomal protein S2
231223_at	4.71e-07	5.09e-08	-6.35229	8.00335	-2.76394	2.76394	CSMD1	CUB and Sushi multiple domains 1
227346_at	1.57e-13	2.12e-15	11.0995	24.8257	2.76348	2.76348	IKZF1	IKAROS family zinc finger 1
232748_at	1.14e-08	7.75e-10	-7.48627	12.1355	-2.76133	2.76133	PAPPA	pappalysin 1
242515_x_at	1.13e-12	2.07e-14	10.428	22.5707	0.917688	0.917688	AKIP1	A-kinase interacting protein 1
204199_at	1.94e-12	3.91e-14	-10.243	21.9397	-2.75996	2.75996	RALGPS1	Ral GEF with PH domain and SH3 binding motif 1
203470_s_at	1.77e-12	3.5e-14	10.2751	22.0493	2.75964	2.75964	PLEK	pleckstrin
1552798_a_at	1.23e-11	3.26e-13	9.6345	19.8358	2.75775	2.75775	TLR4	toll like receptor 4
213332_at	2.38e-12	4.94e-14	-10.175	21.7068	-2.75741	2.75741	PAPPA2	pappalysin 2
227607_at	5.08e-17	8.18e-20	14.3349	34.8623	2.75697	2.75697	STAMBPL1	STAM binding protein like 1
228912_at	1.29e-07	1.2e-08	-6.74483	9.43017	-2.75695	2.75695	VIL1	villin 1
210472_at	3.59e-08	2.82e-09	-7.13621	10.858	-2.75523	2.75523	MT1G	metallothionein 1G
244289_at	3.88e-12	8.69e-14	-10.0126	21.1481	-2.75242	2.75242	ZNF300P1	zinc finger protein 300 pseudogene 1
232771_at	4.9e-08	4.01e-09	-7.041	10.5104	-2.75124	2.75124	NRK	Nik related kinase
206522_at	1.89e-06	2.41e-07	-5.9282	6.47424	-2.75106	2.75106	MGAM	maltase-glucoamylase
237334_at	5.47e-12	1.28e-13	-9.90056	20.7609	-2.75049	2.75049	SFXN2	sideroflexin 2
210619_s_at	1.31e-09	6.72e-11	-8.15204	14.5558	-2.7502	2.7502	HYAL1	hyaluronoglucosaminidase 1
1552535_at	8.32e-11	2.89e-12	-9.02047	17.6725	-2.74906	2.74906	CLDN19	claudin 19
202997_s_at	1.49e-07	1.4e-08	6.70189	9.27371	2.74846	2.74846	LOXL2	lysyl oxidase like 2
209201_x_at	3.15e-15	1.78e-17	12.5691	29.5567	2.74701	2.74701	CXCR4	C-X-C motif chemokine receptor 4
243163_at	6.6e-12	1.59e-13	-9.84024	20.5518	-2.74683	2.74683	HECW1	HECT, C2 and WW domain containing E3 ubiquitin protein ligase 1
221581_s_at	6.88e-16	2.79e-18	13.1618	31.3836	2.74671	2.74671	LAT2	linker for activation of T-cells family member 2
230276_at	2.65e-12	5.62e-14	10.1382	21.5802	2.7466	2.7466	FAM49A	family with sequence similarity 49 member A
1559280_a_at	4.16e-06	5.81e-07	-5.68585	5.60923	-2.74412	2.74412	APELA	apelin receptor early endogenous ligand
224505_s_at	6.95e-10	3.29e-11	-8.34769	15.2628	-2.74326	2.74326	PLCD4	phospholipase C delta 4
231334_at	1.34e-13	1.77e-15	-11.1535	25.0045	-2.74155	2.74155	LOC101929480	uncharacterized LOC101929480
209182_s_at	6.51e-13	1.1e-14	10.6138	23.2001	2.7412	2.7412	C10orf10	chromosome 10 open reading frame 10
201939_at	2.13e-14	1.89e-16	11.8316	27.2182	2.74118	2.74118	PLK2	polo like kinase 2
229411_at	1.49e-07	1.4e-08	6.70213	9.2746	2.73952	2.73952	PNCK	pregnancy up-regulated nonubiquitous CaM kinase
230252_at	3.74e-14	3.8e-16	11.6186	26.5295	2.73902	2.73902	LPAR5	lysophosphatidic acid receptor 5
204745_x_at	4.28e-11	1.36e-12	-9.23263	18.4242	-2.73776	2.73776	MT1G	metallothionein 1G
225626_at	3.26e-16	1.01e-18	13.4942	32.3877	2.73734	2.73734	PAG1	phosphoprotein membrane anchor with glycosphingolipid microdomains 1
34471_at	8.81e-05	1.76e-05	-4.72307	2.27543	-2.7336	2.7336	MYH8	myosin heavy chain 8
213975_s_at	9.33e-12	2.37e-13	9.7256	20.1534	2.73318	2.73318	LYZ	lysozyme
205316_at	1.46e-16	3.43e-19	-13.8518	33.4516	-2.73179	2.73179	SLC15A2	solute carrier family 15 member 2
203435_s_at	7.79e-09	5.09e-10	-7.60034	12.5513	-2.73171	2.73171	MME	membrane metallo-endopeptidase
208423_s_at	3.56e-10	1.54e-11	8.55735	16.0176	2.73164	2.73164	MSR1	macrophage scavenger receptor 1
204774_at	1.01e-14	7.4e-17	12.1219	28.1474	2.73012	2.73012	EVI2A	ecotropic viral integration site 2A
1559502_s_at	1.79e-12	3.55e-14	10.2711	22.0358	2.7298	2.7298	LRRC25	leucine rich repeat containing 25
210227_at	5e-07	5.45e-08	-6.33371	7.93604	-2.72938	2.72938	DLGAP2	DLG associated protein 2
219655_at	2.05e-13	2.86e-15	-11.0111	24.5321	-2.72924	2.72924	SUGCT	succinyl-CoA:glutarate-CoA transferase
228532_at	7.47e-15	5.17e-17	12.2337	28.5023	2.72878	2.72878	C1orf162	chromosome 1 open reading frame 162
221589_s_at	3.88e-17	6.03e-20	-14.4387	35.1615	-2.72766	2.72766	ALDH6A1	aldehyde dehydrogenase 6 family member A1
1552584_at	1.57e-11	4.38e-13	9.55131	19.545	2.7276	2.7276	IL12RB1	interleukin 12 receptor subunit beta 1
217973_at	2.72e-15	1.45e-17	-12.6329	29.7555	-2.72753	2.72753	DCXR	dicarbonyl and L-xylulose reductase
224027_at	2.28e-09	1.26e-10	7.97971	13.9312	2.72728	2.72728	CCL28	C-C motif chemokine ligand 28
228929_at	2.42e-12	5.04e-14	-10.1695	21.6879	-2.72664	2.72664	DNASE1	deoxyribonuclease 1
211654_x_at	3.74e-12	8.34e-14	10.0242	21.1881	2.72625	2.72625	HLA-DQB1	major histocompatibility complex, class II, DQ beta 1
226403_at	1.21e-11	3.22e-13	-9.63882	19.8509	-2.72501	2.72501	TMC4	transmembrane channel like 4
209368_at	1.3e-07	1.2e-08	-6.74315	9.42403	-2.724	2.724	EPHX2	epoxide hydrolase 2
205885_s_at	5.71e-14	6.25e-16	11.4674	26.0366	2.72368	2.72368	ITGA4	integrin subunit alpha 4
227695_at	9.55e-11	3.4e-12	-8.97585	17.5138	-2.72343	2.72343	LOC100287413///GLYATL1	uncharacterized LOC100287413///glycine-N-acyltransferase like 1
228499_at	3.21e-13	4.85e-15	10.854	24.008	2.72309	2.72309	PFKFB4	6-phosphofructo-2-kinase/fructose-2,6-biphosphatase 4
205102_at	3.25e-12	7.07e-14	-10.072	21.3527	-2.72203	2.72203	TMPRSS2	transmembrane protease, serine 2
215049_x_at	2.42e-11	7.12e-13	9.41374	19.0624	2.72012	2.72012	CD163	CD163 molecule
209613_s_at	6.62e-07	7.42e-08	-6.24957	7.63152	-2.71943	2.71943	ADH1B	alcohol dehydrogenase 1B (class I), beta polypeptide
1555844_s_at	1.5e-12	2.91e-14	10.3284	22.2315	0.971776	0.971776	HNRNPM	heterogeneous nuclear ribonucleoprotein M
223623_at	1.35e-06	1.64e-07	-6.03256	6.84895	-2.7188	2.7188	C2orf40	chromosome 2 open reading frame 40
219747_at	2.46e-07	2.45e-08	-6.55043	8.72256	-2.71848	2.71848	NDNF	neuron derived neurotrophic factor
204447_at	9.44e-14	1.15e-15	-11.2835	25.4337	-2.71702	2.71702	LZTS3	leucine zipper tumor suppressor family member 3
211748_x_at	6.87e-08	5.87e-09	-6.93779	10.1338	-2.71606	2.71606	PTGDS	prostaglandin D2 synthase
239726_at	2.06e-11	5.94e-13	-9.46507	19.2427	-2.71514	2.71514	ANK3	ankyrin 3, node of Ranvier (ankyrin G)
220065_at	5.47e-05	1.03e-05	-4.877	2.79434	-2.71411	2.71411	TNMD	tenomodulin
208692_at	1.57e-12	3.05e-14	10.3148	22.185	0.954529	0.954529	RPS3	ribosomal protein S3
219388_at	1.28e-12	2.41e-14	-10.3839	22.4206	-2.71333	2.71333	GRHL2	grainyhead like transcription factor 2
230971_x_at	4.77e-07	5.16e-08	-6.34834	7.98905	-2.70822	2.70822	GLTPD2	glycolipid transfer protein domain containing 2
216705_s_at	1.71e-10	6.65e-12	8.78928	16.8486	2.70759	2.70759	ADA	adenosine deaminase
223232_s_at	9.46e-11	3.36e-12	-8.97882	17.5244	-2.70751	2.70751	CGN	cingulin
217013_at	7.18e-10	3.41e-11	-8.33767	15.2267	-2.70624	2.70624	AZGP1P1	alpha-2-glycoprotein 1, zinc-binding pseudogene 1
201030_x_at	1.65e-12	3.25e-14	-10.2968	22.1236	-0.910723	0.910723	LDHB	lactate dehydrogenase B
228335_at	2.91e-07	2.97e-08	-6.49845	8.53367	-2.70549	2.70549	CLDN11	claudin 11
1554199_at	1.5e-08	1.06e-09	-7.40158	11.8266	-2.7046	2.7046	PTPRO	protein tyrosine phosphatase, receptor type O
228086_at	6.58e-10	3.09e-11	-8.36494	15.325	-2.70116	2.70116	STK33	serine/threonine kinase 33
209789_at	2.74e-08	2.07e-09	-7.21948	11.1619	-2.70102	2.70102	CORO2B	coronin 2B
210375_at	1.87e-07	1.81e-08	-6.63267	9.02172	-2.69837	2.69837	PTGER3	prostaglandin E receptor 3
222088_s_at	4.51e-10	2.01e-11	8.48372	15.7529	2.69809	2.69809	SLC2A14///SLC2A3	solute carrier family 2 member 14///solute carrier family 2 member 3
205776_at	6.77e-12	1.63e-13	-9.83254	20.5251	-2.69791	2.69791	FMO5	flavin containing monooxygenase 5
211395_x_at	7.69e-13	1.33e-14	10.558	23.0117	2.6974	2.6974	FCGR2C	Fc fragment of IgG receptor IIc (gene/pseudogene)
212187_x_at	1.77e-08	1.27e-09	-7.35236	11.6469	-2.6973	2.6973	PTGDS	prostaglandin D2 synthase
211902_x_at	1.2e-08	8.24e-10	7.46959	12.0746	2.69489	2.69489	YME1L1	YME1 like 1 ATPase
213343_s_at	5.32e-10	2.41e-11	8.43348	15.572	2.69477	2.69477	GDPD5	glycerophosphodiester phosphodiesterase domain containing 5
243764_at	3.61e-09	2.13e-10	7.83769	13.4153	2.69418	2.69418	VSIG1	V-set and immunoglobulin domain containing 1
223610_at	1.15e-11	3.03e-13	9.65581	19.9102	2.69326	2.69326	SEMA5B	semaphorin 5B
223502_s_at	9.32e-15	6.72e-17	12.1519	28.2427	2.6926	2.6926	TNFSF13B	tumor necrosis factor superfamily member 13b
201563_at	6.23e-16	2.45e-18	-13.2045	31.5134	-2.6916	2.6916	SORD	sorbitol dehydrogenase
214204_at	5.86e-17	1.03e-19	-14.256	34.6342	-2.69143	2.69143	PACRG	PARK2 coregulated
213603_s_at	4.33e-16	1.45e-18	13.3754	32.0304	2.68904	2.68904	RAC2	ras-related C3 botulinum toxin substrate 2 (rho family, small GTP binding protein Rac2)
214023_x_at	7.43e-09	4.82e-10	-7.61502	12.6048	-2.68879	2.68879	TUBB2B	tubulin beta 2B class IIb
38269_at	1.86e-12	3.71e-14	10.2582	21.9917	0.764532	0.764532	PRKD2	protein kinase D2
221583_s_at	2.21e-08	1.63e-09	7.28382	11.3968	2.68841	2.68841	KCNMA1	potassium calcium-activated channel subfamily M alpha 1
205844_at	1.02e-08	6.87e-10	-7.5188	12.2541	-2.68793	2.68793	VNN1	vanin 1
219414_at	1.4e-07	1.3e-08	-6.72156	9.34537	-2.68742	2.68742	CLSTN2	calsyntenin 2
225809_at	7.64e-09	4.98e-10	-7.60623	12.5728	-2.6861	2.6861	PARM1	prostate androgen-regulated mucin-like protein 1
204733_at	3.87e-10	1.7e-11	-8.53005	15.9195	-2.68578	2.68578	KLK6	kallikrein related peptidase 6
1556271_at	1.64e-10	6.34e-12	-8.80212	16.8945	-2.68409	2.68409	LOC101928896	uncharacterized LOC101928896
213537_at	2.48e-09	1.39e-10	7.95304	13.8344	2.67996	2.67996	HLA-DPA1	major histocompatibility complex, class II, DP alpha 1
212873_at	1.37e-10	5.13e-12	8.86095	17.1045	2.67991	2.67991	ARHGAP45	Rho GTPase activating protein 45
205083_at	3.13e-07	3.22e-08	-6.47655	8.45412	-2.67889	2.67889	AOX1	aldehyde oxidase 1
205978_at	4.77e-10	2.14e-11	-8.46633	15.6903	-2.67866	2.67866	KL	klotho
225689_at	1.95e-12	3.93e-14	-10.2415	21.9344	-0.995079	0.995079	POMGNT2	protein O-linked mannose N-acetylglucosaminyltransferase 2 (beta 1,4-)
240114_s_at	9.61e-13	1.72e-14	-10.4811	22.7509	-2.6785	2.6785	TMEM174	transmembrane protein 174
239707_at	2.94e-07	3e-08	-6.49602	8.52485	-2.67828	2.67828	SLC5A10	solute carrier family 5 member 10
1558972_s_at	5.18e-07	5.65e-08	6.32366	7.89964	2.67781	2.67781	THEMIS	thymocyte selection associated
202901_x_at	4.44e-13	7.16e-15	10.739	23.6221	2.67591	2.67591	CTSS	cathepsin S
202431_s_at	9.47e-14	1.15e-15	11.2824	25.4298	2.67443	2.67443	MYC	v-myc avian myelocytomatosis viral oncogene homolog
224732_at	2.08e-12	4.21e-14	-10.2212	21.8651	-0.848128	0.848128	CHTF8	chromosome transmission fidelity factor 8
213798_s_at	2.08e-12	4.22e-14	10.2206	21.8629	0.905017	0.905017	CAP1	adenylate cyclase associated protein 1
210020_x_at	1.1e-10	4.02e-12	-8.92873	17.3461	-2.67436	2.67436	CALML3	calmodulin like 3
213906_at	3.64e-12	8.05e-14	10.0345	21.2236	2.67384	2.67384	MYBL1	MYB proto-oncogene like 1
205127_at	4.54e-06	6.42e-07	5.65826	5.51123	2.67314	2.67314	PTGS1	prostaglandin-endoperoxide synthase 1
204719_at	3.05e-10	1.28e-11	-8.60709	16.1961	-2.6724	2.6724	ABCA8	ATP binding cassette subfamily A member 8
204726_at	5.49e-08	4.56e-09	7.0059	10.3823	2.67224	2.67224	CDH13	cadherin 13
226906_s_at	5.77e-11	1.9e-12	9.13863	18.0917	2.6716	2.6716	ARHGAP9	Rho GTPase activating protein 9
1554246_at	2.28e-06	2.95e-07	-5.87178	6.2722	-2.67143	2.67143	C1orf210	chromosome 1 open reading frame 210
226492_at	7.11e-13	1.21e-14	-10.5835	23.098	-2.67136	2.67136	SEMA6D	semaphorin 6D
219370_at	5.89e-10	2.72e-11	-8.40017	15.452	-2.67121	2.67121	RPRM	reprimo, TP53 dependent G2 arrest mediator candidate
206584_at	1.41e-13	1.87e-15	11.1379	24.953	2.67098	2.67098	LY96	lymphocyte antigen 96
228766_at	6.15e-08	5.19e-09	6.97095	10.2548	2.67061	2.67061	CD36	CD36 molecule
225817_at	1.41e-09	7.37e-11	-8.12682	14.4645	-2.66709	2.66709	LOC101930349///LOC101930344///CGNL1	uncharacterized LOC101930349///uncharacterized LOC101930344///cingulin like 1
200852_x_at	2.23e-12	4.58e-14	10.1972	21.7827	0.971713	0.971713	GNB2	G protein subunit beta 2
228360_at	2.96e-12	6.38e-14	-10.1016	21.4547	-2.66592	2.66592	LYPD6B	LY6/PLAUR domain containing 6B
201948_at	2.24e-12	4.62e-14	10.1947	21.7743	0.90321	0.90321	GNL2	G protein nucleolar 2
210051_at	1.96e-12	3.96e-14	-10.2395	21.9278	-2.6658	2.6658	RAPGEF3	Rap guanine nucleotide exchange factor 3
223748_at	3.14e-13	4.71e-15	-10.8625	24.0364	-2.66453	2.66453	SLC4A11	solute carrier family 4 member 11
210194_at	1.69e-09	9.01e-11	-8.07192	14.2656	-2.66349	2.66349	PLA2R1	phospholipase A2 receptor 1
1558971_at	1.43e-06	1.76e-07	6.01404	6.78237	2.6633	2.6633	THEMIS	thymocyte selection associated
221916_at	7.65e-05	1.51e-05	4.76902	2.42964	2.66287	2.66287	NEFL	neurofilament, light polypeptide
203418_at	1.52e-09	7.99e-11	8.10464	14.3841	2.66284	2.66284	CCNA2	cyclin A2
219424_at	8.33e-12	2.09e-13	9.76191	20.2798	2.66225	2.66225	EBI3	Epstein-Barr virus induced 3
205155_s_at	3.88e-11	1.21e-12	-9.26384	18.5344	-2.66057	2.66057	SPTBN2	spectrin beta, non-erythrocytic 2
212587_s_at	2.16e-16	5.73e-19	13.681	32.9457	2.65792	2.65792	PTPRC	protein tyrosine phosphatase, receptor type C
205177_at	1.88e-08	1.36e-09	-7.33355	11.5783	-2.65678	2.65678	TNNI1	troponin I1, slow skeletal type
201858_s_at	1.33e-15	6.18e-18	12.9058	30.6002	2.65671	2.65671	SRGN	serglycin
230391_at	3e-13	4.46e-15	10.8785	24.0899	2.6567	2.6567	CD84	CD84 molecule
231372_at	4.31e-09	2.6e-10	-7.7826	13.215	-2.65639	2.65639	SLC25A48	solute carrier family 25 member 48
202847_at	6.7e-14	7.56e-16	-11.4095	25.8473	-2.65621	2.65621	PCK2	phosphoenolpyruvate carboxykinase 2, mitochondrial
206300_s_at	0.000104	2.13e-05	4.66853	2.09315	2.65537	2.65537	PTHLH	parathyroid hormone like hormone
238160_at	1.78e-10	6.93e-12	-8.77765	16.807	-2.65437	2.65437	ACOT12	acyl-CoA thioesterase 12
219543_at	1.32e-09	6.79e-11	-8.14901	14.5448	-2.65356	2.65356	PBLD	phenazine biosynthesis like protein domain containing
229638_at	1.28e-12	2.4e-14	10.3843	22.4221	2.65321	2.65321	IRX3	iroquois homeobox 3
214641_at	9.07e-08	8e-09	-6.85398	9.82804	-2.65308	2.65308	COL4A3	collagen type IV alpha 3 chain
225701_at	1.75e-09	9.39e-11	8.06061	14.2246	2.65135	2.65135	AKNA	AT-hook transcription factor
220224_at	4.87e-07	5.28e-08	-6.34183	7.96546	-2.65106	2.65106	HAO1	hydroxyacid oxidase 1
223087_at	2.54e-12	5.33e-14	-10.1533	21.6323	-0.989371	0.989371	ECHDC1	ethylmalonyl-CoA decarboxylase 1
223782_s_at	3.01e-07	3.08e-08	-6.48863	8.49799	-2.65035	2.65035	TINAG	tubulointerstitial nephritis antigen
227209_at	1.48e-10	5.62e-12	-8.83559	17.014	-2.64819	2.64819	CNTN1	contactin 1
1552578_a_at	2.89e-08	2.2e-09	-7.20322	11.1026	-2.64805	2.64805	MYO3B	myosin IIIB
223721_s_at	5.41e-12	1.27e-13	-9.90426	20.7737	-2.64409	2.64409	DNAJC12	DnaJ heat shock protein family (Hsp40) member C12
219892_at	2e-15	9.94e-18	12.7538	30.1309	2.64396	2.64396	TM6SF1	transmembrane 6 superfamily member 1
1554834_a_at	8.99e-10	4.41e-11	8.26759	14.9736	2.64332	2.64332	RASSF5	Ras association domain family member 5
215559_at	3.46e-07	3.59e-08	-6.4467	8.34573	-2.64192	2.64192	LOC101930322///ABCC6	multidrug resistance-associated protein 6-like///ATP binding cassette subfamily C member 6
230087_at	2.56e-05	4.42e-06	5.11922	3.62312	2.64118	2.64118	PRIMA1	proline rich membrane anchor 1
1553319_at	1.06e-08	7.2e-10	-7.50621	12.2082	-2.64047	2.64047	OXGR1	oxoglutarate receptor 1
223582_at	3.62e-11	1.13e-12	-9.28434	18.6068	-2.63962	2.63962	ADGRV1	adhesion G protein-coupled receptor V1
211367_s_at	3.34e-14	3.28e-16	11.6631	26.6737	2.63947	2.63947	CASP1	caspase 1
243610_at	2.74e-06	3.64e-07	-5.81426	6.06659	-2.63938	2.63938	C9orf135	chromosome 9 open reading frame 135
224719_s_at	2.72e-12	5.77e-14	10.1304	21.5535	0.991833	0.991833	C12orf57	chromosome 12 open reading frame 57
229034_at	1.9e-12	3.82e-14	-10.2499	21.9631	-2.63935	2.63935	SOBP	sine oculis binding protein homolog
208775_at	2.74e-12	5.83e-14	10.1277	21.5442	0.816681	0.816681	XPO1	exportin 1
225911_at	1.81e-09	9.77e-11	-8.04968	14.185	-2.63903	2.63903	NPNT	nephronectin
225622_at	1.12e-17	1.05e-20	15.0444	36.88	2.63811	2.63811	PAG1	phosphoprotein membrane anchor with glycosphingolipid microdomains 1
206785_s_at	1.26e-07	1.16e-08	6.75329	9.461	2.63766	2.63766	KLRC2///KLRC1	killer cell lectin like receptor C2///killer cell lectin like receptor C1
205884_at	4.48e-12	1.02e-13	9.96692	20.9903	2.63696	2.63696	ITGA4	integrin subunit alpha 4
216953_s_at	4.58e-06	6.47e-07	-5.65574	5.5023	-2.63632	2.63632	WT1	Wilms tumor 1
228438_at	3.65e-13	5.65e-15	10.8086	23.8559	2.63455	2.63455	MSC-AS1	MSC antisense RNA 1
236597_at	4.29e-08	3.43e-09	-7.08325	10.6646	-2.63367	2.63367	UGT3A1	UDP glycosyltransferase family 3 member A1
220651_s_at	1.17e-06	1.4e-07	6.07678	7.00803	2.63342	2.63342	MCM10	minichromosome maintenance 10 replication initiation factor
226961_at	7.31e-14	8.4e-16	-11.3779	25.7436	-2.63287	2.63287	PRR15	proline rich 15
231230_at	7.98e-09	5.23e-10	-7.59264	12.5233	-2.63211	2.63211	KCNK10	potassium two pore domain channel subfamily K member 10
207858_s_at	3.18e-06	4.31e-07	-5.76808	5.90186	-2.63002	2.63002	PKLR	pyruvate kinase, liver and RBC
214043_at	2.61e-10	1.08e-11	-8.65552	16.3699	-2.62957	2.62957	PTPRD	protein tyrosine phosphatase, receptor type D
205495_s_at	7.23e-08	6.21e-09	6.92236	10.0775	2.62849	2.62849	GNLY	granulysin
1557692_a_at	3.3e-05	5.85e-06	5.03959	3.34912	2.62736	2.62736	GATM	glycine amidinotransferase
203760_s_at	1.03e-13	1.28e-15	11.2499	25.3229	2.62721	2.62721	SLA	Src-like-adaptor
210362_x_at	2.42e-10	9.93e-12	8.67794	16.4502	2.62711	2.62711	PML	promyelocytic leukemia
239381_at	7.17e-11	2.43e-12	-9.06945	17.8464	-2.62585	2.62585	KLK7	kallikrein related peptidase 7
210831_s_at	1.03e-06	1.21e-07	-6.11521	7.14648	-2.62185	2.62185	PTGER3	prostaglandin E receptor 3
205524_s_at	3.87e-08	3.06e-09	7.1139	10.7765	2.62143	2.62143	HAPLN1	hyaluronan and proteoglycan link protein 1
244264_at	1.25e-10	4.66e-12	-8.88783	17.2004	-2.62079	2.62079	KLRG2	killer cell lectin like receptor G2
227764_at	7.3e-08	6.28e-09	-6.91929	10.0663	-2.61941	2.61941	LYPD6	LY6/PLAUR domain containing 6
207412_x_at	1.4e-08	9.74e-10	-7.42419	11.909	-2.61931	2.61931	CELP	carboxyl ester lipase pseudogene
201105_at	3.19e-18	1.34e-21	15.7774	38.8979	2.61896	2.61896	LGALS1	galectin 1
1553299_at	8.18e-09	5.38e-10	7.58535	12.4967	2.6184	2.6184	DUSP5P1	dual specificity phosphatase 5 pseudogene 1
228143_at	1.86e-05	3.11e-06	5.21866	3.96726	2.61752	2.61752	CP	ceruloplasmin (ferroxidase)
207148_x_at	9.22e-07	1.07e-07	-6.14857	7.26676	-2.6171	2.6171	MYOZ2	myozenin 2
224361_s_at	8.38e-10	4.07e-11	-8.2896	15.0531	-2.61646	2.61646	IL17RB	interleukin 17 receptor B
1554804_a_at	4.51e-11	1.44e-12	-9.21644	18.367	-2.61642	2.61642	CLDN19	claudin 19
219268_at	4.78e-16	1.66e-18	-13.331	31.8967	-2.61551	2.61551	ETNK2	ethanolamine kinase 2
206120_at	4.14e-12	9.32e-14	9.99245	21.0785	2.61486	2.61486	CD33	CD33 molecule
1555471_a_at	4e-08	3.17e-09	-7.10443	10.7419	-2.61368	2.61368	FMN2	formin 2
218976_at	2.4e-13	3.43e-15	-10.9562	24.3493	-2.6125	2.6125	DNAJC12	DnaJ heat shock protein family (Hsp40) member C12
222182_s_at	3.49e-12	7.66e-14	10.0489	21.2733	0.881765	0.881765	CNOT2	CCR4-NOT transcription complex subunit 2
223822_at	5.91e-08	4.96e-09	-6.98343	10.3003	-2.61133	2.61133	SUSD4	sushi domain containing 4
206230_at	2.22e-12	4.56e-14	-10.1986	21.7875	-2.61068	2.61068	LHX1	LIM homeobox 1
205278_at	0.000203	4.49e-05	-4.44938	1.36975	-2.61044	2.61044	GAD1	glutamate decarboxylase 1
244410_at	1.43e-09	7.49e-11	-8.12234	14.4483	-2.61035	2.61035	PKHD1	polycystic kidney and hepatic disease 1 (autosomal recessive)
214180_at	1.01e-15	4.46e-18	-13.0103	30.9212	-2.60941	2.60941	MAN1C1	mannosidase alpha class 1C member 1
1553912_at	1.82e-07	1.75e-08	-6.64118	9.05268	-2.60817	2.60817	LINC00955	long intergenic non-protein coding RNA 955
1555787_at	1.35e-12	2.56e-14	-10.3657	22.3586	-2.60722	2.60722	C11orf63	chromosome 11 open reading frame 63
239464_at	1.29e-09	6.57e-11	-8.15817	14.578	-2.60605	2.60605	KCNJ15	potassium voltage-gated channel subfamily J member 15
221666_s_at	3.7e-14	3.74e-16	11.6234	26.5451	2.60389	2.60389	PYCARD	PYD and CARD domain containing
203185_at	5.23e-15	3.28e-17	12.3756	28.9502	2.60383	2.60383	RASSF2	Ras association domain family member 2
222911_s_at	3.56e-08	2.79e-09	7.1391	10.8685	2.60201	2.60201	CXorf36	chromosome X open reading frame 36
202310_s_at	4.57e-07	4.93e-08	6.36093	8.03465	2.60091	2.60091	COL1A1	collagen type I alpha 1 chain
229041_s_at	2.15e-08	1.59e-09	7.29168	11.4255	2.59896	2.59896	ITGB2-AS1	ITGB2 antisense RNA 1
209584_x_at	1.48e-16	3.53e-19	13.8423	33.4235	2.59881	2.59881	APOBEC3C	apolipoprotein B mRNA editing enzyme catalytic subunit 3C
210215_at	1.06e-05	1.65e-06	5.39551	4.58423	2.59666	2.59666	TFR2	transferrin receptor 2
226030_at	2.74e-15	1.49e-17	-12.6245	29.7294	-2.596	2.596	ACADSB	acyl-CoA dehydrogenase, short/branched chain
228850_s_at	3.07e-12	6.66e-14	-10.0889	21.4109	-2.59557	2.59557	SLIT2	slit guidance ligand 2
223809_at	2.81e-10	1.17e-11	8.63217	16.2861	2.59423	2.59423	RGS18	regulator of G-protein signaling 18
205506_at	8.03e-07	9.21e-08	-6.19066	7.41867	-2.59418	2.59418	VIL1	villin 1
226887_at	3.75e-12	8.36e-14	10.0237	21.1863	0.823453	0.823453	HSPA14	heat shock protein family A (Hsp70) member 14
224901_at	2.15e-12	4.4e-14	-10.209	21.8231	-2.59349	2.59349	SCD5	stearoyl-CoA desaturase 5
207156_at	9.17e-06	1.41e-06	5.43985	4.73985	2.59328	2.59328	HIST1H2AH///HIST1H2AG///HIST1H2AM///HIST1H2AL///HIST1H2AK///HIST1H2AI	histone cluster 1, H2ah///histone cluster 1, H2ag///histone cluster 1, H2am///histone cluster 1, H2al///histone cluster 1, H2ak///histone cluster 1, H2ai
221805_at	0.000247	5.61e-05	4.38378	1.15618	2.59217	2.59217	NEFL	neurofilament, light polypeptide
218084_x_at	6.4e-18	4.21e-21	15.3665	37.775	2.59133	2.59133	FXYD5	FXYD domain containing ion transport regulator 5
1568813_at	2.13e-07	2.09e-08	6.59308	8.87766	2.5897	2.5897	SLC16A1-AS1	SLC16A1 antisense RNA 1
212488_at	5.31e-07	5.82e-08	6.31568	7.87076	2.58761	2.58761	COL5A1	collagen type V alpha 1 chain
227143_s_at	3.97e-12	8.91e-14	10.0053	21.1229	0.930967	0.930967	BID	BH3 interacting domain death agonist
213629_x_at	5.37e-10	2.44e-11	-8.43043	15.561	-2.58681	2.58681	MT1F	metallothionein 1F
221658_s_at	1.75e-10	6.84e-12	8.78139	16.8204	2.58602	2.58602	IL21R	interleukin 21 receptor
1556641_at	1.61e-09	8.57e-11	-8.08557	14.3151	-2.58544	2.58544	SLC7A14	solute carrier family 7 member 14
37145_at	6.85e-09	4.4e-10	7.6398	12.6951	2.58417	2.58417	GNLY	granulysin
213416_at	2.86e-15	1.58e-17	12.6067	29.6739	2.5803	2.5803	ITGA4	integrin subunit alpha 4
202912_at	4.17e-12	9.38e-14	9.99056	21.072	2.57918	2.57918	ADM	adrenomedullin
208473_s_at	6.07e-08	5.11e-09	-6.97499	10.2695	-2.57743	2.57743	GP2	glycoprotein 2
228033_at	5.44e-07	5.97e-08	6.30889	7.84614	2.5771	2.5771	E2F7	E2F transcription factor 7
236261_at	3.88e-13	6.08e-15	-10.787	23.7834	-2.5758	2.5758	OSBPL6	oxysterol binding protein like 6
227347_x_at	2.14e-10	8.59e-12	8.71827	16.5946	2.57515	2.57515	HES4	hes family bHLH transcription factor 4
218332_at	2e-07	1.94e-08	-6.6136	8.95234	-2.575	2.575	BEX1	brain expressed X-linked 1
229560_at	4.33e-13	6.91e-15	10.7491	23.6562	2.5745	2.5745	TLR8	toll like receptor 8
223922_x_at	1.62e-14	1.34e-16	11.9388	27.5625	2.57314	2.57314	MS4A6A	membrane spanning 4-domains A6A
224869_s_at	4.43e-12	1.01e-13	-9.97039	21.0024	-0.976858	0.976858	MRPS25	mitochondrial ribosomal protein S25
226034_at	1.21e-10	4.48e-12	8.89907	17.2404	2.57102	2.57102	DUSP4	dual specificity phosphatase 4
201819_at	1.46e-11	4.01e-13	9.57624	19.6322	2.57047	2.57047	SCARB1	scavenger receptor class B member 1
226142_at	2.76e-13	4.06e-15	10.9068	24.1844	2.57001	2.57001	GLIPR1	GLI pathogenesis related 1
219945_at	9.86e-13	1.78e-14	-10.472	22.7203	-2.56887	2.56887	DDX25	DEAD-box helicase 25
226622_at	1.24e-05	1.98e-06	-5.34504	4.40755	-2.56872	2.56872	MUC20	mucin 20, cell surface associated
227005_at	4.66e-12	1.06e-13	-9.95481	20.9485	-0.906567	0.906567	RPP14	ribonuclease P/MRP subunit p14
214811_at	4.09e-08	3.25e-09	-7.09737	10.7162	-2.56644	2.56644	RIMBP2	RIMS binding protein 2
230946_at	1.75e-10	6.81e-12	-8.78252	16.8244	-2.56571	2.56571	FMN2	formin 2
231693_at	5.68e-10	2.6e-11	-8.41295	15.4981	-2.56519	2.56519	FABP1	fatty acid binding protein 1
202108_at	1.51e-13	2.01e-15	-11.1156	24.879	-2.56434	2.56434	PEPD	peptidase D
232693_s_at	1.78e-12	3.52e-14	10.2735	22.0439	2.56429	2.56429	FBXO16///ZNF395	F-box protein 16///zinc finger protein 395
206765_at	1.03e-10	3.72e-12	8.95068	17.4243	2.5638	2.5638	KCNJ2	potassium voltage-gated channel subfamily J member 2
203645_s_at	9.76e-12	2.49e-13	9.71094	20.1024	2.56315	2.56315	CD163	CD163 molecule
1552826_at	2e-10	7.92e-12	-8.74055	16.6744	-2.56246	2.56246	SLC26A7	solute carrier family 26 member 7
229101_at	4.88e-12	1.12e-13	9.9392	20.8945	0.70483	0.70483	IL17RA	interleukin 17 receptor A
203290_at	0.00565	0.00194	3.26342	-2.2214	2.56124	2.56124	HLA-DQA1	major histocompatibility complex, class II, DQ alpha 1
231925_at	2.64e-08	1.99e-09	7.23075	11.2031	2.56122	2.56122	P2RY1	purinergic receptor P2Y1
213349_at	4.62e-10	2.06e-11	8.47634	15.7263	2.56016	2.56016	TMCC1	transmembrane and coiled-coil domain family 1
219121_s_at	2.44e-07	2.44e-08	-6.55217	8.72888	-2.55934	2.55934	ESRP1	epithelial splicing regulatory protein 1
208367_x_at	4.15e-06	5.79e-07	-5.68681	5.61262	-2.559	2.559	CYP3A4	cytochrome P450 family 3 subfamily A member 4
219282_s_at	1.7e-12	3.35e-14	10.288	22.0936	2.55877	2.55877	TRPV2	transient receptor potential cation channel subfamily V member 2
209732_at	3.49e-13	5.35e-15	10.8246	23.9095	2.55866	2.55866	CLEC2B	C-type lectin domain family 2 member B
1555490_s_at	3.02e-11	9.17e-13	-9.34247	18.8117	-2.55841	2.55841	PDZD3	PDZ domain containing 3
209612_s_at	3.79e-05	6.86e-06	-4.99447	3.19453	-2.55834	2.55834	ADH1B	alcohol dehydrogenase 1B (class I), beta polypeptide
221602_s_at	3.5e-09	2.05e-10	7.84794	13.4526	2.55821	2.55821	FCMR	Fc fragment of IgM receptor
208307_at	4.51e-07	4.86e-08	-6.36482	8.04878	-2.5582	2.5582	RBMY1J///RBMY1E///RBMY1D///RBMY1B///RBMY1F///RBMY1A1	RNA binding motif protein, Y-linked, family 1, member J///RNA binding motif protein, Y-linked, family 1, member E///RNA binding motif protein, Y-linked, family 1, member D///RNA binding motif protein, Y-linked, family 1, member B///RNA binding motif protein, Y-linked, family 1, member F///RNA binding motif protein, Y-linked, family 1, member A1
208966_x_at	1.3e-18	2.1e-22	16.4573	40.7113	2.55349	2.55349	IFI16	interferon gamma inducible protein 16
206023_at	3.02e-05	5.32e-06	5.06659	3.44187	2.55329	2.55329	NMU	neuromedin U
60474_at	1.85e-08	1.33e-09	-7.33882	11.5975	-2.55328	2.55328	FERMT1	fermitin family member 1
205046_at	8.35e-07	9.61e-08	6.1791	7.37694	2.55123	2.55123	CENPE	centromere protein E
1555800_at	0.000876	0.000233	-3.95148	-0.212059	-2.55117	2.55117	ZNF385B	zinc finger protein 385B
225032_at	5.22e-12	1.22e-13	9.91638	20.8156	0.953168	0.953168	LOC101928615///FNDC3B	uncharacterized LOC101928615///fibronectin type III domain containing 3B
205034_at	1.03e-09	5.15e-11	8.22497	14.8196	2.55098	2.55098	CCNE2	cyclin E2
1570189_at	7.48e-08	6.45e-09	-6.912	10.0397	-2.55092	2.55092	LINC00671	long intergenic non-protein coding RNA 671
218009_s_at	3.65e-10	1.58e-11	8.54914	15.9881	2.55033	2.55033	PRC1	protein regulator of cytokinesis 1
205488_at	4.62e-11	1.48e-12	9.20803	18.3373	2.55023	2.55023	GZMA	granzyme A
229625_at	9.99e-10	4.97e-11	8.23487	14.8554	2.5499	2.5499	GBP5	guanylate binding protein 5
205952_at	4.77e-09	2.92e-10	7.75091	13.0996	2.54959	2.54959	KCNK3	potassium two pore domain channel subfamily K member 3
228017_s_at	5.74e-07	6.33e-08	-6.29261	7.78724	-2.54917	2.54917	NKAIN4	Na+/K+ transporting ATPase interacting 4
214297_at	7.39e-07	8.4e-08	6.21582	7.50955	2.54906	2.54906	CSPG4	chondroitin sulfate proteoglycan 4
210861_s_at	1.31e-07	1.22e-08	-6.7405	9.41438	-2.54885	2.54885	WISP3	WNT1 inducible signaling pathway protein 3
1554938_a_at	1.92e-11	5.51e-13	-9.48628	19.3171	-2.54595	2.54595	ACOT11	acyl-CoA thioesterase 11
225799_at	3.3e-17	4.71e-20	14.5231	35.4039	2.54564	2.54564	LOC101930489///MIR4435-2HG///LINC00152	uncharacterized LOC101930489///MIR4435-2 host gene///long intergenic non-protein coding RNA 152
226659_at	3.59e-09	2.12e-10	7.83895	13.4199	2.54563	2.54563	DEF6	DEF6, guanine nucleotide exchange factor
209879_at	1.44e-12	2.79e-14	10.3412	22.2752	2.54555	2.54555	SELPLG	selectin P ligand
236058_at	1.43e-07	1.33e-08	-6.71576	9.32426	-2.54512	2.54512	KDF1	keratinocyte differentiation factor 1
241915_at	1.77e-08	1.27e-09	-7.3521	11.646	-2.54492	2.54492	ACSM2B	acyl-CoA synthetase medium-chain family member 2B
224209_s_at	7.56e-06	1.14e-06	-5.50018	4.95215	-2.54399	2.54399	GDA	guanine deaminase
223820_at	1.38e-05	2.23e-06	-5.31117	4.28925	-2.54294	2.54294	RBP5	retinol binding protein 5
243755_at	1.24e-13	1.59e-15	-11.1859	25.1116	-2.54228	2.54228	PRLR	prolactin receptor
33304_at	2.37e-11	6.94e-13	9.42121	19.0887	2.5416	2.5416	ISG20	interferon stimulated exonuclease gene 20
244565_at	7.48e-12	1.84e-13	-9.79832	20.4063	-2.54135	2.54135	HMX2	H6 family homeobox 2
228700_at	5.84e-12	1.38e-13	9.8793	20.6872	0.9549	0.9549	CXorf38	chromosome X open reading frame 38
243952_at	1.56e-09	8.26e-11	-8.09553	14.3511	-2.54047	2.54047	TPTEP1	transmembrane phosphatase with tensin homology pseudogene 1
205831_at	5.17e-10	2.33e-11	8.44256	15.6047	2.54008	2.54008	CD2	CD2 molecule
237058_x_at	1.47e-06	1.81e-07	-6.00548	6.75158	-2.53741	2.53741	SLC6A13	solute carrier family 6 member 13
216638_s_at	9.9e-11	3.53e-12	-8.96482	17.4746	-2.53719	2.53719	PRLR	prolactin receptor
204959_at	3.98e-15	2.34e-17	12.4819	29.2839	2.53717	2.53717	MNDA	myeloid cell nuclear differentiation antigen
210889_s_at	3.86e-09	2.29e-10	7.81708	13.3404	2.53579	2.53579	FCGR2B	Fc fragment of IgG receptor IIb
230710_at	2.09e-09	1.14e-10	8.00688	14.0298	2.53439	2.53439	MIR210HG	MIR210 host gene
212977_at	6.8e-12	1.64e-13	9.83013	20.5167	2.53356	2.53356	ACKR3	atypical chemokine receptor 3
214560_at	3.64e-12	8.06e-14	10.0341	21.2221	2.53261	2.53261	FPR3	formyl peptide receptor 3
211991_s_at	3.88e-17	5.97e-20	14.4419	35.1708	2.53213	2.53213	HLA-DPA1	major histocompatibility complex, class II, DP alpha 1
229019_at	3.23e-05	5.72e-06	-5.04639	3.37246	-2.53084	2.53084	ZNF385B	zinc finger protein 385B
202718_at	1.58e-07	1.49e-08	-6.68487	9.21173	-2.53053	2.53053	IGFBP2	insulin like growth factor binding protein 2
215259_s_at	7.51e-09	4.89e-10	-7.61115	12.5907	-2.52838	2.52838	CADM4	cell adhesion molecule 4
213102_at	6.49e-12	1.55e-13	9.84624	20.5727	0.859832	0.859832	ACTR3	ARP3 actin related protein 3 homolog
214351_x_at	6.51e-12	1.56e-13	9.84499	20.5683	0.910937	0.910937	SNORD68///RPL13	small nucleolar RNA, C/D box 68///ribosomal protein L13
236236_at	3.07e-10	1.3e-11	-8.60453	16.1869	-2.52824	2.52824	WNK3	WNK lysine deficient protein kinase 3
219594_at	1.48e-10	5.61e-12	8.83631	17.0166	2.52794	2.52794	NINJ2	ninjurin 2
209114_at	6.91e-05	1.34e-05	-4.80163	2.53946	-2.52714	2.52714	TSPAN1	tetraspanin 1
215126_at	7.47e-09	4.85e-10	-7.61316	12.598	-2.52608	2.52608	LINC01314	long intergenic non-protein coding RNA 1314
228739_at	2.84e-07	2.89e-08	-6.50606	8.56133	-2.52587	2.52587	CYS1	cystin 1
201893_x_at	2.49e-06	3.26e-07	-5.84453	6.17475	-2.52518	2.52518	DCN	decorin
225996_at	8.14e-06	1.23e-06	-5.47679	4.86978	-2.52497	2.52497	LONRF2	LON peptidase N-terminal domain and ring finger 2
212588_at	1.52e-14	1.24e-16	11.9614	27.6349	2.52246	2.52246	PTPRC	protein tyrosine phosphatase, receptor type C
220432_s_at	9.25e-08	8.18e-09	-6.84798	9.80617	-2.52235	2.52235	CYP39A1	cytochrome P450 family 39 subfamily A member 1
219386_s_at	1.29e-12	2.43e-14	10.3812	22.4114	2.522	2.522	SLAMF8	SLAM family member 8
205312_at	5.55e-09	3.46e-10	7.70494	12.9323	2.522	2.522	SPI1	Spi-1 proto-oncogene
230785_at	3.86e-09	2.29e-10	-7.81686	13.3396	-2.52149	2.52149	SALL3	spalt like transcription factor 3
236641_at	3.15e-08	2.43e-09	7.17601	11.0032	2.52098	2.52098	KIF14	kinesin family member 14
240480_at	2.76e-06	3.68e-07	-5.81169	6.05743	-2.5193	2.5193	TINAG	tubulointerstitial nephritis antigen
205833_s_at	1.67e-07	1.59e-08	-6.66817	9.15095	-2.51844	2.51844	PART1	prostate androgen-regulated transcript 1 (non-protein coding)
202831_at	2.18e-10	8.75e-12	-8.71311	16.5761	-2.5183	2.5183	GPX2	glutathione peroxidase 2
1555252_a_at	2.13e-08	1.57e-09	-7.29538	11.439	-2.51634	2.51634	TRPM3	transient receptor potential cation channel subfamily M member 3
211552_s_at	8.89e-14	1.06e-15	-11.3064	25.5091	-2.51632	2.51632	ALDH4A1	aldehyde dehydrogenase 4 family member A1
233030_at	1.75e-10	6.8e-12	-8.78279	16.8254	-2.51434	2.51434	PNPLA3	patatin like phospholipase domain containing 3
206208_at	6.85e-08	5.85e-09	-6.9387	10.1371	-2.51429	2.51429	CA4	carbonic anhydrase 4
220892_s_at	1.71e-08	1.22e-09	-7.36336	11.6871	-2.51262	2.51262	PSAT1	phosphoserine aminotransferase 1
227560_at	7.05e-16	2.93e-18	-13.1466	31.3373	-2.51128	2.51128	SFXN2	sideroflexin 2
226801_s_at	7.16e-12	1.75e-13	9.81279	20.4566	0.819865	0.819865	AIDA	axin interactor, dorsalization associated
206797_at	4.64e-06	6.57e-07	-5.65185	5.48851	-2.51083	2.51083	NAT2	N-acetyltransferase 2
242037_at	5.14e-09	3.18e-10	7.72788	13.0158	2.5107	2.5107	ASPH	aspartate beta-hydroxylase
235885_at	3.91e-08	3.1e-09	7.11085	10.7654	2.51026	2.51026	P2RY12	purinergic receptor P2Y12
219452_at	5.33e-08	4.42e-09	7.01465	10.4142	2.51013	2.51013	DPEP2	dipeptidase 2
231880_at	1.24e-06	1.49e-07	-6.05867	6.94284	-2.50915	2.50915	STRIP2	striatin interacting protein 2
209156_s_at	1.34e-09	6.92e-11	8.1439	14.5263	2.50659	2.50659	COL6A2	collagen type VI alpha 2 chain
205419_at	1.94e-10	7.66e-12	8.74984	16.7076	2.50544	2.50544	GPR183	G protein-coupled receptor 183
205695_at	3.62e-11	1.13e-12	9.28418	18.6062	2.50351	2.50351	SDS	serine dehydratase
209070_s_at	6.71e-07	7.54e-08	6.24498	7.61494	2.50313	2.50313	RGS5	regulator of G-protein signaling 5
214424_s_at	7.48e-11	2.56e-12	-9.05476	17.7943	-2.50283	2.50283	ALDOB	aldolase, fructose-bisphosphate B
214274_s_at	1.24e-16	2.7e-19	-13.9318	33.6875	-2.50279	2.50279	ACAA1	acetyl-CoA acyltransferase 1
204286_s_at	7.67e-07	8.75e-08	6.20453	7.46877	2.50245	2.50245	PMAIP1	phorbol-12-myristate-13-acetate-induced protein 1
213831_at	0.0137	0.00539	2.90266	-3.17388	2.50243	2.50243	LOC100509457///HLA-DQA1	HLA class II histocompatibility antigen, DQ alpha 1 chain-like///major histocompatibility complex, class II, DQ alpha 1
238877_at	2.2e-07	2.17e-08	-6.58372	8.84364	-2.50024	2.50024	EYA4	EYA transcriptional coactivator and phosphatase 4
228863_at	2.26e-09	1.25e-10	7.98207	13.9397	2.49987	2.49987	PCDH17	protocadherin 17
204279_at	1.23e-17	1.26e-20	14.9803	36.7003	2.49954	2.49954	PSMB9	proteasome subunit beta 9
223773_s_at	1.82e-12	3.61e-14	10.2661	22.0187	2.49932	2.49932	SNORA16A///SNORA61///SNORA44///SNHG12	small nucleolar RNA, H/ACA box 16A///small nucleolar RNA, H/ACA box 61///small nucleolar RNA, H/ACA box 44///small nucleolar RNA host gene 12
222680_s_at	1.49e-09	7.81e-11	8.11098	14.4071	2.49865	2.49865	DTL	denticleless E3 ubiquitin protein ligase homolog
242344_at	4.72e-08	3.84e-09	-7.05249	10.5523	-2.49841	2.49841	GABRB2	gamma-aminobutyric acid type A receptor beta2 subunit
226315_at	7.91e-12	1.96e-13	9.78012	20.3431	0.795032	0.795032	ZNF830	zinc finger protein 830
219368_at	1.72e-06	2.16e-07	-5.95785	6.58056	-2.49661	2.49661	NAP1L2	nucleosome assembly protein 1 like 2
203967_at	7.89e-09	5.16e-10	7.59632	12.5367	2.49651	2.49651	CDC6	cell division cycle 6
221221_s_at	3.98e-13	6.28e-15	-10.7777	23.7523	-2.49624	2.49624	KLHL3	kelch like family member 3
231781_s_at	3.92e-11	1.23e-12	-9.26078	18.5236	-2.49624	2.49624	LRRC2	leucine rich repeat containing 2
213599_at	6.04e-09	3.81e-10	7.67911	12.8383	2.49621	2.49621	OIP5	Opa interacting protein 5
211829_s_at	4.44e-09	2.7e-10	7.77262	13.1787	2.49536	2.49536	GPER1	G protein-coupled estrogen receptor 1
242414_at	4.43e-11	1.41e-12	-9.22135	18.3844	-2.49536	2.49536	QPRT	quinolinate phosphoribosyltransferase
205489_at	8.89e-10	4.35e-11	-8.27137	14.9873	-2.4953	2.4953	CRYM	crystallin mu
210553_x_at	1.52e-06	1.88e-07	5.996	6.71753	2.49348	2.49348	LOC100507472///PCSK6	uncharacterized LOC100507472///proprotein convertase subtilisin/kexin type 6
230573_at	9.76e-14	1.2e-15	-11.2705	25.3907	-2.49319	2.49319	SGK2	SGK2, serine/threonine kinase 2
230949_at	7.65e-07	8.73e-08	-6.20512	7.4709	-2.49101	2.49101	SLC23A3	solute carrier family 23 member 3
238429_at	2.28e-08	1.69e-09	7.27436	11.3623	2.49091	2.49091	TMEM71	transmembrane protein 71
204232_at	9.99e-16	4.38e-18	13.016	30.9386	2.49063	2.49063	FCER1G	Fc fragment of IgE receptor Ig
202705_at	1.08e-07	9.7e-09	6.80158	9.63698	2.49039	2.49039	CCNB2	cyclin B2
223501_at	1.87e-14	1.59e-16	11.8852	27.3907	2.49018	2.49018	TNFSF13B	tumor necrosis factor superfamily member 13b
205744_at	5.75e-09	3.6e-10	7.69454	12.8945	2.48976	2.48976	DOC2A	double C2 domain alpha
237484_at	5.73e-11	1.88e-12	-9.14076	18.0992	-2.48952	2.48952	SMCO3	single-pass membrane protein with coiled-coil domains 3
205106_at	1.94e-08	1.41e-09	7.32395	11.5433	2.4895	2.4895	CMC4///MTCP1	C-X9-C motif containing 4///mature T-cell proliferation 1
213151_s_at	8.64e-12	2.17e-13	9.75036	20.2396	0.787667	0.787667	2020-09-07	septin 7
205328_at	1.04e-06	1.23e-07	-6.11075	7.1304	-2.48903	2.48903	CLDN10	claudin 10
210262_at	5.77e-08	4.82e-09	-6.99075	10.327	-2.4883	2.4883	CRISP2	cysteine rich secretory protein 2
209993_at	3.94e-09	2.35e-10	-7.81015	13.3152	-2.48825	2.48825	ABCB1	ATP binding cassette subfamily B member 1
219593_at	2.17e-13	3.06e-15	10.9902	24.4626	2.48823	2.48823	SLC15A3	solute carrier family 15 member 3
235867_at	1.05e-14	7.88e-17	-12.1024	28.0853	-2.48815	2.48815	GSTM3	glutathione S-transferase mu 3
223216_x_at	4.43e-13	7.12e-15	10.7405	23.627	2.48815	2.48815	FBXO16///ZNF395	F-box protein 16///zinc finger protein 395
236302_at	1.5e-10	5.71e-12	-8.8313	16.9987	-2.48767	2.48767	PPM1E	protein phosphatase, Mg2+/Mn2+ dependent 1E
240200_at	1.1e-09	5.51e-11	-8.20652	14.7529	-2.48689	2.48689	SULT1C2	sulfotransferase family 1C member 2
221232_s_at	2.2e-06	2.84e-07	-5.88276	6.31149	-2.48662	2.48662	ANKRD2	ankyrin repeat domain 2
1554242_a_at	3.29e-06	4.47e-07	-5.75797	5.86584	-2.48535	2.48535	COCH	cochlin
215264_at	8.18e-11	2.84e-12	-9.02565	17.6909	-2.48516	2.48516	EMX1	empty spiracles homeobox 1
211527_x_at	3.99e-09	2.39e-10	7.80633	13.3013	2.48391	2.48391	VEGFA	vascular endothelial growth factor A
226032_at	9.41e-12	2.39e-13	9.72305	20.1446	0.869994	0.869994	CASP2	caspase 2
61874_at	9.47e-12	2.41e-13	-9.72118	20.138	-0.915778	0.915778	CACFD1	calcium channel flower domain containing 1
223784_at	9.53e-06	1.47e-06	-5.42755	4.69665	-2.48327	2.48327	TMEM27	transmembrane protein 27
204924_at	2.35e-14	2.15e-16	11.7925	27.0923	2.48058	2.48058	TLR2	toll like receptor 2
202589_at	1.04e-13	1.3e-15	11.2472	25.3139	2.48019	2.48019	TYMS	thymidylate synthetase
208923_at	9.72e-12	2.48e-13	9.71287	20.1091	0.734442	0.734442	CYFIP1	cytoplasmic FMR1 interacting protein 1
215300_s_at	2.07e-08	1.51e-09	-7.30445	11.4721	-2.47946	2.47946	FMO5	flavin containing monooxygenase 5
222853_at	2.67e-06	3.53e-07	-5.82262	6.09645	-2.47557	2.47557	FLRT3	fibronectin leucine rich transmembrane protein 3
243951_at	4.97e-12	1.15e-13	-9.93303	20.8732	-2.47526	2.47526	ABCB1	ATP binding cassette subfamily B member 1
240223_at	9.85e-08	8.77e-09	-6.8291	9.73732	-2.47494	2.47494	SLC2A9	solute carrier family 2 member 9
223774_at	6.03e-10	2.8e-11	8.39232	15.4237	2.47449	2.47449	SNORA16A///SNORA61///SNORA44///SNHG12	small nucleolar RNA, H/ACA box 16A///small nucleolar RNA, H/ACA box 61///small nucleolar RNA, H/ACA box 44///small nucleolar RNA host gene 12
214681_at	4.39e-14	4.61e-16	-11.5598	26.338	-2.47434	2.47434	GK	glycerol kinase
225757_s_at	2.52e-11	7.48e-13	-9.39976	19.0133	-2.47401	2.47401	CLMN	calmin
211012_s_at	1.34e-09	6.92e-11	8.14386	14.5262	2.47211	2.47211	PML	promyelocytic leukemia
210511_s_at	1.1e-05	1.74e-06	5.38151	4.53518	2.47198	2.47198	INHBA	inhibin beta A subunit
227433_at	1.01e-11	2.6e-13	-9.69908	20.0611	-0.991768	0.991768	USF3	upstream transcription factor family member 3
224308_s_at	1.03e-11	2.66e-13	9.69286	20.0394	0.887117	0.887117	INTS2	integrator complex subunit 2
228865_at	5.3e-08	4.39e-09	-7.0163	10.4203	-2.47151	2.47151	C1orf116	chromosome 1 open reading frame 116
210644_s_at	1.21e-15	5.57e-18	12.9388	30.7017	2.47122	2.47122	LAIR1	leukocyte associated immunoglobulin like receptor 1
204736_s_at	4.2e-08	3.35e-09	7.08961	10.6878	2.47061	2.47061	CSPG4	chondroitin sulfate proteoglycan 4
1552398_a_at	3.05e-08	2.35e-09	7.18597	11.0396	2.47053	2.47053	CLEC12A	C-type lectin domain family 12 member A
1558402_at	3.71e-07	3.9e-08	-6.42475	8.26611	-2.46952	2.46952	CTD-3080P12.3	uncharacterized LOC101928857
202442_at	1.06e-11	2.73e-13	9.68557	20.014	0.846914	0.846914	AP3S1	adaptor related protein complex 3 sigma 1 subunit
1563881_at	4.42e-09	2.68e-10	-7.77414	13.1842	-2.46795	2.46795	MAGI1	membrane associated guanylate kinase, WW and PDZ domain containing 1
206369_s_at	5.72e-10	2.62e-11	8.41034	15.4887	2.46751	2.46751	PIK3CG	phosphatidylinositol-4,5-bisphosphate 3-kinase catalytic subunit gamma
223074_s_at	4.72e-09	2.89e-10	-7.75381	13.1102	-2.46733	2.46733	AIF1L	allograft inflammatory factor 1 like
228377_at	3.22e-10	1.37e-11	-8.58972	16.1338	-2.46691	2.46691	KLHL14	kelch like family member 14
206045_s_at	2.24e-06	2.9e-07	-5.87684	6.2903	-2.46663	2.46663	NOL4	nucleolar protein 4
202208_s_at	1.88e-07	1.82e-08	6.63173	9.01829	2.46388	2.46388	ARL4C	ADP ribosylation factor like GTPase 4C
219947_at	3.68e-12	8.16e-14	10.0308	21.2107	2.46373	2.46373	CLEC4A	C-type lectin domain family 4 member A
213113_s_at	2.43e-13	3.48e-15	10.9525	24.3368	2.46082	2.46082	SLC43A3	solute carrier family 43 member 3
244344_at	5.2e-08	4.29e-09	-7.0225	10.4429	-2.46064	2.46064	WNK4	WNK lysine deficient protein kinase 4
211787_s_at	1.09e-11	2.84e-13	9.67385	19.9731	0.977408	0.977408	LOC101928634///SENP3-EIF4A1///SNORD10///SNORA48///SNORA67///EIF4A1	uncharacterized LOC101928634///SENP3-EIF4A1 readthrough (NMD candidate)///small nucleolar RNA, C/D box 10///small nucleolar RNA, H/ACA box 48///small nucleolar RNA, H/ACA box 67///eukaryotic translation initiation factor 4A1
221054_s_at	2.34e-06	3.05e-07	-5.86332	6.24193	-2.45943	2.45943	TCL6	T-cell leukemia/lymphoma 6 (non-protein coding)
203797_at	3.38e-09	1.97e-10	-7.8586	13.4913	-2.45917	2.45917	VSNL1	visinin like 1
218397_at	1.1e-11	2.86e-13	9.6722	19.9674	0.92865	0.92865	FANCL	Fanconi anemia complementation group L
228613_at	2.96e-11	8.95e-13	-9.34938	18.836	-2.45909	2.45909	RAB11FIP3	RAB11 family interacting protein 3
212687_at	1.1e-11	2.86e-13	9.67178	19.9659	0.903449	0.903449	LIMS4///LIMS3///LIMS1	LIM zinc finger domain containing 4///LIM zinc finger domain containing 3///LIM zinc finger domain containing 1
206539_s_at	4.09e-09	2.45e-10	-7.79861	13.2732	-2.458	2.458	CYP4F12	cytochrome P450 family 4 subfamily F member 12
222536_s_at	2.47e-11	7.3e-13	9.40693	19.0385	2.45717	2.45717	ZNF395	zinc finger protein 395
206610_s_at	1.79e-08	1.29e-09	-7.34852	11.6329	-2.45713	2.45713	F11	coagulation factor XI
1553729_s_at	1.07e-08	7.22e-10	-7.50547	12.2055	-2.4566	2.4566	LRRC43	leucine rich repeat containing 43
203213_at	1.05e-10	3.77e-12	8.9465	17.4094	2.45392	2.45392	CDK1	cyclin dependent kinase 1
1557905_s_at	8.49e-11	2.97e-12	9.01294	17.6457	2.45353	2.45353	CD44	CD44 molecule (Indian blood group)
1562440_at	7.74e-06	1.17e-06	-5.4928	4.92615	-2.45333	2.45333	MAP3K13	mitogen-activated protein kinase kinase kinase 13
211813_x_at	1.47e-05	2.39e-06	-5.29234	4.22357	-2.45193	2.45193	DCN	decorin
212915_at	6.21e-08	5.25e-09	-6.96776	10.2431	-2.45126	2.45126	PDZRN3	PDZ domain containing ring finger 3
204717_s_at	2.05e-10	8.12e-12	-8.7337	16.6499	-2.44907	2.44907	SLC29A2	solute carrier family 29 member 2
212410_at	1.15e-11	3.03e-13	-9.65612	19.9113	-0.994725	0.994725	MICU2	mitochondrial calcium uptake 2
242388_x_at	2.95e-08	2.26e-09	7.1964	11.0777	2.44769	2.44769	TAGAP	T-cell activation RhoGTPase activating protein
210869_s_at	2.28e-14	2.07e-16	11.8048	27.132	2.4475	2.4475	MIR6756///MCAM	microRNA 6756///melanoma cell adhesion molecule
238755_at	2.58e-08	1.94e-09	-7.23696	11.2257	-2.44649	2.44649	RASSF10	Ras association domain family member 10
243614_s_at	3.11e-09	1.8e-10	-7.88332	13.5812	-2.44562	2.44562	PRODH2	proline dehydrogenase 2
201438_at	3.96e-07	4.19e-08	6.40468	8.19329	2.44492	2.44492	COL6A3	collagen type VI alpha 3 chain
219281_at	7.84e-14	9.09e-16	-11.3539	25.665	-2.44492	2.44492	MSRA	methionine sulfoxide reductase A
222405_at	1.17e-11	3.1e-13	-9.64931	19.8875	-0.908693	0.908693	HACD3	3-hydroxyacyl-CoA dehydratase 3
241369_at	2.58e-07	2.59e-08	-6.53543	8.66806	-2.44477	2.44477	ADAMTS9-AS1	ADAMTS9 antisense RNA 1
230917_at	1.25e-14	9.7e-17	-12.0377	27.879	-2.44432	2.44432	PLCG2	phospholipase C gamma 2
231941_s_at	4.16e-06	5.81e-07	-5.68555	5.60815	-2.44276	2.44276	MUC20	mucin 20, cell surface associated
1554300_a_at	5.04e-08	4.13e-09	-7.03266	10.48	-2.44258	2.44258	SVOPL	SVOP like
221698_s_at	1.12e-13	1.42e-15	11.2202	25.2249	2.44133	2.44133	CLEC7A	C-type lectin domain family 7 member A
219722_s_at	2.8e-12	6e-14	-10.1191	21.5146	-2.44025	2.44025	GDPD3	glycerophosphodiester phosphodiesterase domain containing 3
207610_s_at	1.72e-09	9.18e-11	8.0668	14.247	2.43932	2.43932	ADGRE2	adhesion G protein-coupled receptor E2
210116_at	1.32e-07	1.22e-08	6.73933	9.4101	2.43923	2.43923	SH2D1A	SH2 domain containing 1A
235709_at	6.13e-08	5.17e-09	6.97184	10.258	2.43657	2.43657	GAS2L3	growth arrest specific 2 like 3
203764_at	1.07e-08	7.25e-10	7.5043	12.2012	2.43523	2.43523	DLGAP5	DLG associated protein 5
1553147_at	1.79e-05	2.98e-06	-5.23046	4.00822	-2.43442	2.43442	RANBP3L	RAN binding protein 3 like
202413_s_at	1.24e-11	3.32e-13	9.62994	19.8199	0.905441	0.905441	USP1	ubiquitin specific peptidase 1
222877_at	1.19e-09	6.02e-11	8.18192	14.6639	2.43407	2.43407	NRP2	neuropilin 2
211530_x_at	4.25e-15	2.56e-17	12.4535	29.1949	2.43394	2.43394	HLA-G	major histocompatibility complex, class I, G
225834_at	1.74e-11	4.92e-13	9.51825	19.4292	2.43295	2.43295	FAM72A///FAM72D///FAM72B///FAM72C	family with sequence similarity 72 member A///family with sequence similarity 72 member D///family with sequence similarity 72 member B///family with sequence similarity 72 member C
203940_s_at	1.77e-11	5.03e-13	9.51208	19.4076	2.43273	2.43273	VASH1	vasohibin 1
205208_at	3.39e-08	2.64e-09	-7.1542	10.9236	-2.43133	2.43133	ALDH1L1	aldehyde dehydrogenase 1 family member L1
229635_at	4.85e-12	1.11e-13	9.94133	20.9019	2.43019	2.43019	LINC01094	long intergenic non-protein coding RNA 1094
236161_at	0.000591	0.000149	4.0879	0.211935	2.42938	2.42938	KCCAT333	renal clear cell carcinoma-associated transcript 333
227226_at	3.39e-08	2.64e-09	-7.15451	10.9247	-2.42887	2.42887	MRAP2	melanocortin 2 receptor accessory protein 2
34210_at	1.13e-09	5.68e-11	8.19824	14.7229	2.4288	2.4288	CD52	CD52 molecule
218838_s_at	1.27e-11	3.42e-13	9.62166	19.791	0.785779	0.785779	TTC31	tetratricopeptide repeat domain 31
219995_s_at	4.88e-06	6.95e-07	-5.63599	5.43224	-2.42863	2.42863	ZNF750	zinc finger protein 750
225165_at	5.68e-09	3.55e-10	-7.6984	12.9085	-2.4284	2.4284	PPP1R1B	protein phosphatase 1 regulatory inhibitor subunit 1B
203561_at	1.51e-16	3.62e-19	13.8334	33.3973	2.42813	2.42813	FCGR2A	Fc fragment of IgG receptor IIa
243776_at	3.64e-08	2.86e-09	-7.13233	10.8438	-2.42698	2.42698	LOC105374428	uncharacterized LOC105374428
210523_at	2.48e-07	2.48e-08	-6.54761	8.71232	-2.42549	2.42549	BMPR1B	bone morphogenetic protein receptor type 1B
205681_at	4.04e-11	1.27e-12	9.25026	18.4865	2.42467	2.42467	BCL2A1	BCL2 related protein A1
1559277_at	9.76e-08	8.67e-09	-6.83207	9.74814	-2.42318	2.42318	FLJ35700	uncharacterized protein FLJ35700
239294_at	8.7e-14	1.03e-15	11.3161	25.5409	2.42292	2.42292	PIK3CG	phosphatidylinositol-4,5-bisphosphate 3-kinase catalytic subunit gamma
232617_at	8.45e-15	6.01e-17	12.1864	28.3522	2.42263	2.42263	CTSS	cathepsin S
236038_at	2.65e-14	2.48e-16	-11.7483	26.9495	-2.42242	2.42242	RNF150	ring finger protein 150
226274_at	6.8e-12	1.64e-13	-9.8308	20.5191	-2.42205	2.42205	CLCN5	chloride voltage-gated channel 5
221570_s_at	1.34e-11	3.63e-13	9.60419	19.7299	0.937447	0.937447	METTL5	methyltransferase like 5
242271_at	9.19e-08	8.1e-09	-6.85036	9.81485	-2.42193	2.42193	SLC26A9	solute carrier family 26 member 9
205082_s_at	1.9e-07	1.84e-08	-6.62796	9.00458	-2.42102	2.42102	AOX1	aldehyde oxidase 1
204126_s_at	1.29e-07	1.2e-08	6.74502	9.43084	2.41979	2.41979	CDC45	cell division cycle 45
230044_at	2.36e-10	9.58e-12	-8.68781	16.4855	-2.41947	2.41947	PCYT2	phosphate cytidylyltransferase 2, ethanolamine
204457_s_at	4.84e-09	2.97e-10	-7.74627	13.0828	-2.41869	2.41869	GAS1	growth arrest specific 1
235733_at	1.17e-09	5.91e-11	8.18727	14.6833	2.4186	2.4186	GXYLT2	glucoside xylosyltransferase 2
221725_at	1.37e-11	3.73e-13	9.59701	19.7048	0.798522	0.798522	WASF2	WAS protein family member 2
239410_at	3.43e-09	2e-10	7.85401	13.4747	2.41801	2.41801	HK2	hexokinase 2
219890_at	1.1e-08	7.47e-10	7.49622	12.1718	2.41795	2.41795	CLEC5A	C-type lectin domain family 5 member A
206381_at	7.67e-10	3.67e-11	-8.3178	15.1549	-2.41794	2.41794	SCN2A	sodium voltage-gated channel alpha subunit 2
211656_x_at	1.26e-10	4.69e-12	8.88632	17.195	2.41674	2.41674	LOC101060835///HLA-DQB1	HLA class II histocompatibility antigen, DQ beta 1 chain-like///major histocompatibility complex, class II, DQ beta 1
213539_at	6.75e-10	3.18e-11	8.35708	15.2967	2.41673	2.41673	CD3D	CD3d molecule
229309_at	1.65e-11	4.63e-13	-9.53536	19.4891	-2.41521	2.41521	ADRB1	adrenoceptor beta 1
204424_s_at	2.3e-08	1.71e-09	-7.27153	11.3519	-2.41412	2.41412	LMO3	LIM domain only 3
222305_at	2.71e-09	1.53e-10	7.9265	13.738	2.41376	2.41376	HK2	hexokinase 2
235161_at	9.69e-09	6.49e-10	-7.53437	12.3109	-2.41319	2.41319	RASSF8-AS1	RASSF8 atnisense RNA 1
217297_s_at	1.35e-09	6.96e-11	8.14252	14.5213	2.41156	2.41156	MYO9B	myosin IXB
1560396_at	8.42e-09	5.55e-10	7.57669	12.4651	2.41073	2.41073	KLHL6	kelch like family member 6
206681_x_at	2.13e-07	2.09e-08	-6.59378	8.88022	-2.40923	2.40923	GP2	glycoprotein 2
204891_s_at	8.02e-09	5.26e-10	7.59122	12.5181	2.40774	2.40774	LCK	LCK proto-oncogene, Src family tyrosine kinase
206149_at	7.03e-07	7.94e-08	-6.23109	7.56473	-2.407	2.407	CHP2	calcineurin like EF-hand protein 2
218149_s_at	1.01e-13	1.25e-15	11.258	25.3497	2.40656	2.40656	ZNF395	zinc finger protein 395
223562_at	3.37e-11	1.04e-12	9.30781	18.6895	2.40572	2.40572	PARVG	parvin gamma
205859_at	7.81e-17	1.54e-19	14.1195	34.2372	2.4053	2.4053	LY86	lymphocyte antigen 86
229595_at	1.47e-11	4.06e-13	-9.57231	19.6185	-0.861002	0.861002	CHCHD4	coiled-coil-helix-coiled-coil-helix domain containing 4
201052_s_at	1.48e-11	4.1e-13	9.56984	19.6098	0.904937	0.904937	PSMF1	proteasome inhibitor subunit 1
211286_x_at	3.81e-13	5.93e-15	10.7944	23.808	2.40484	2.40484	CSF2RA	colony stimulating factor 2 receptor alpha subunit
206325_at	4.22e-07	4.5e-08	-6.38526	8.12284	-2.40444	2.40444	SERPINA6	serpin family A member 6
1557078_at	4e-08	3.17e-09	7.10443	10.7419	2.40328	2.40328	SLFN5	schlafen family member 5
225908_at	1.52e-11	4.2e-13	9.56287	19.5854	0.934018	0.934018	IAH1	isoamyl acetate-hydrolyzing esterase 1 homolog
225997_at	1.52e-11	4.22e-13	-9.56188	19.582	-0.944383	0.944383	MOB1B	MOB kinase activator 1B
223620_at	7.4e-15	5.07e-17	12.2393	28.52	2.40282	2.40282	GPR34	G protein-coupled receptor 34
238778_at	2.34e-10	9.51e-12	-8.68987	16.4929	-2.40214	2.40214	MPP7	membrane palmitoylated protein 7
241547_at	1.79e-05	2.99e-06	-5.22988	4.00621	-2.40213	2.40213	A1CF	APOBEC1 complementation factor
230716_at	1.85e-06	2.35e-07	-5.93467	6.49746	-2.40193	2.40193	SMLR1	small leucine rich protein 1
204915_s_at	1.43e-07	1.33e-08	6.7158	9.32441	2.40162	2.40162	SOX11	SRY-box 11
201177_s_at	1.57e-11	4.37e-13	9.55171	19.5464	0.915089	0.915089	UBA2	ubiquitin like modifier activating enzyme 2
204437_s_at	1.15e-08	7.83e-10	-7.48323	12.1244	-2.39898	2.39898	FOLR1	folate receptor 1
234987_at	1.85e-15	9.07e-18	12.7827	30.2205	2.39882	2.39882	SAMHD1	SAM and HD domain containing deoxynucleoside triphosphate triphosphohydrolase 1
211742_s_at	3.62e-16	1.15e-18	13.4505	32.2566	2.39674	2.39674	EVI2B	ecotropic viral integration site 2B
238253_at	5.99e-10	2.77e-11	-8.39489	15.433	-2.39589	2.39589	WDR72	WD repeat domain 72
223065_s_at	1.59e-11	4.44e-13	9.54727	19.5308	0.838722	0.838722	STARD3NL	STARD3 N-terminal like
202957_at	8.95e-17	1.78e-19	14.0706	34.0943	2.39542	2.39542	HCLS1	hematopoietic cell-specific Lyn substrate 1
1553781_at	3.09e-06	4.17e-07	5.77724	5.93453	2.39506	2.39506	ZC3HAV1L	zinc finger CCCH-type containing, antiviral 1 like
223655_at	2.11e-08	1.55e-09	7.29866	11.4509	2.39416	2.39416	CD163L1	CD163 molecule like 1
220485_s_at	2.23e-06	2.89e-07	5.87742	6.29238	2.39388	2.39388	SIRPG	signal regulatory protein gamma
1554027_a_at	4.58e-13	7.43e-15	-10.728	23.585	-2.39378	2.39378	SLC4A4	solute carrier family 4 member 4
236471_at	3.95e-09	2.36e-10	7.80926	13.3119	2.39336	2.39336	NFE2L3	nuclear factor, erythroid 2 like 3
218487_at	8.61e-14	1.02e-15	-11.3195	25.552	-2.3923	2.3923	ALAD	aminolevulinate dehydratase
210121_at	1.92e-05	3.22e-06	-5.20886	3.93323	-2.39219	2.39219	B3GALT2	beta-1,3-galactosyltransferase 2
204355_at	1.68e-11	4.71e-13	-9.53075	19.473	-0.726994	0.726994	DHX30	DEAH-box helicase 30
226733_at	5.33e-15	3.37e-17	-12.3671	28.9233	-2.39188	2.39188	PFKFB2	6-phosphofructo-2-kinase/fructose-2,6-biphosphatase 2
1552508_at	6.6e-06	9.75e-07	5.54242	5.10115	2.39148	2.39148	KCNE4	potassium voltage-gated channel subfamily E regulatory subunit 4
206775_at	2.27e-09	1.26e-10	-7.98076	13.935	-2.39092	2.39092	CUBN	cubilin
202591_s_at	1.71e-11	4.82e-13	9.52394	19.4491	0.901727	0.901727	SSBP1	single stranded DNA binding protein 1
213687_s_at	1.72e-11	4.85e-13	9.52231	19.4434	0.91155	0.91155	RPL35A	ribosomal protein L35a
209992_at	2.86e-16	8.62e-19	-13.5461	32.543	-2.38989	2.38989	PFKFB2	6-phosphofructo-2-kinase/fructose-2,6-biphosphatase 2
209857_s_at	4.72e-09	2.89e-10	-7.75361	13.1095	-2.38975	2.38975	SPHK2	sphingosine kinase 2
227019_at	1.4e-11	3.83e-13	-9.5892	19.6775	-2.38853	2.38853	C1orf226	chromosome 1 open reading frame 226
206461_x_at	2.73e-10	1.14e-11	-8.64077	16.317	-2.38768	2.38768	MT1H	metallothionein 1H
238451_at	3.23e-09	1.87e-10	-7.87217	13.5406	-2.38737	2.38737	MPP7	membrane palmitoylated protein 7
1555175_a_at	2.07e-07	2.03e-08	-6.60193	8.90987	-2.38627	2.38627	PBLD	phenazine biosynthesis like protein domain containing
236513_at	8.03e-11	2.77e-12	9.03246	17.7151	2.38575	2.38575	PRELID2	PRELI domain containing 2
236988_x_at	6.09e-07	6.76e-08	6.27503	7.72361	2.38448	2.38448	ITGB2	integrin subunit beta 2
211013_x_at	1.04e-10	3.73e-12	8.94971	17.4208	2.38414	2.38414	PML	promyelocytic leukemia
228575_at	8.32e-05	1.65e-05	4.74177	2.33814	2.38413	2.38413	IL20RB	interleukin 20 receptor subunit beta
230464_at	5.97e-08	5.02e-09	6.97992	10.2875	2.38304	2.38304	S1PR5	sphingosine-1-phosphate receptor 5
238605_at	1.48e-05	2.42e-06	-5.28942	4.2134	-2.38276	2.38276	NOL4	nucleolar protein 4
243060_at	9.2e-07	1.07e-07	-6.14945	7.26995	-2.38246	2.38246	LINC01532	long intergenic non-protein coding RNA 1532
223132_s_at	1.85e-11	5.27e-13	-9.49896	19.3616	-0.965022	0.965022	TRIM8	tripartite motif containing 8
200951_s_at	2.1e-08	1.54e-09	7.29931	11.4533	2.38234	2.38234	CCND2	cyclin D2
216641_s_at	1.07e-11	2.79e-13	-9.67959	19.9931	-2.38144	2.38144	LAD1	ladinin 1
240070_at	3.76e-07	3.95e-08	6.42088	8.25206	2.38126	2.38126	TIGIT	T-cell immunoreceptor with Ig and ITIM domains
226498_at	7.16e-09	4.62e-10	7.62658	12.6469	2.38004	2.38004	FLT1	fms related tyrosine kinase 1
223660_at	2.23e-08	1.65e-09	7.28109	11.3868	2.38001	2.38001	ADORA3	adenosine A3 receptor
1554343_a_at	2.85e-09	1.63e-10	-7.91019	13.6788	-2.37912	2.37912	STAP1	signal transducing adaptor family member 1
205729_at	9.08e-13	1.61e-14	10.5005	22.8169	2.37884	2.37884	OSMR	oncostatin M receptor
210298_x_at	6.52e-07	7.28e-08	6.25471	7.65011	2.37786	2.37786	FHL1	four and a half LIM domains 1
229800_at	1.19e-10	4.39e-12	8.90433	17.2592	2.37733	2.37733	DCLK1	doublecortin like kinase 1
218223_s_at	4.73e-14	5.02e-16	11.5334	26.2522	2.37681	2.37681	PLEKHO1	pleckstrin homology domain containing O1
228943_at	1.1e-10	4.02e-12	-8.92901	17.3471	-2.3764	2.3764	MAP6	microtubule associated protein 6
204236_at	4.62e-14	4.87e-16	11.5429	26.283	2.37625	2.37625	FLI1	Fli-1 proto-oncogene, ETS transcription factor
219307_at	2.01e-11	5.76e-13	-9.47386	19.2736	-0.975859	0.975859	PDSS2	prenyl (decaprenyl) diphosphate synthase, subunit 2
224225_s_at	2.09e-07	2.05e-08	6.59896	8.89904	2.37397	2.37397	ETV7	ETS variant 7
221701_s_at	3.56e-13	5.47e-15	-10.818	23.8874	-2.37384	2.37384	STRA6	stimulated by retinoic acid 6
209360_s_at	8.72e-13	1.54e-14	10.514	22.8626	2.37266	2.37266	LOC101928269///LOC100506403///RUNX1	uncharacterized LOC101928269///uncharacterized LOC100506403///runt related transcription factor 1
205792_at	0.000111	2.28e-05	4.64868	2.02701	2.37233	2.37233	WISP2	WNT1 inducible signaling pathway protein 2
242308_at	4.33e-09	2.62e-10	-7.78047	13.2072	-2.37221	2.37221	MCOLN3	mucolipin 3
221796_at	1.65e-07	1.57e-08	-6.67208	9.16517	-2.37084	2.37084	NTRK2	neurotrophic receptor tyrosine kinase 2
216733_s_at	1.41e-08	9.85e-10	-7.42121	11.8982	-2.37081	2.37081	GATM	glycine amidinotransferase
202887_s_at	3.89e-10	1.7e-11	8.52875	15.9148	2.36991	2.36991	DDIT4	DNA damage inducible transcript 4
202525_at	5.15e-07	5.61e-08	-6.32537	7.90582	-2.36935	2.36935	PRSS8	protease, serine 8
200073_s_at	2.09e-11	6.05e-13	9.45995	19.2247	0.824344	0.824344	HNRNPD	heterogeneous nuclear ribonucleoprotein D
204787_at	2.1e-13	2.94e-15	11.0023	24.5028	2.36803	2.36803	VSIG4	V-set and immunoglobulin domain containing 4
211989_at	2.11e-11	6.1e-13	9.45746	19.216	0.96806	0.96806	SMARCE1	SWI/SNF related, matrix associated, actin dependent regulator of chromatin, subfamily e, member 1
218548_x_at	2.12e-11	6.12e-13	-9.45636	19.2121	-0.976495	0.976495	TEX264	testis expressed 264
240413_at	9.99e-07	1.18e-07	6.12411	7.17857	2.36706	2.36706	PYHIN1	pyrin and HIN domain family member 1
230595_at	4.98e-07	5.42e-08	-6.33509	7.94106	-2.3668	2.3668	PGM5-AS1	PGM5 antisense RNA 1
208549_x_at	2.16e-11	6.28e-13	9.44927	19.1872	0.839806	0.839806	PTMA	prothymosin, alpha
211368_s_at	6.03e-16	2.36e-18	13.217	31.5513	2.36659	2.36659	CASP1	caspase 1
218898_at	2.74e-14	2.58e-16	11.7371	26.9133	2.36612	2.36612	FAM57A	family with sequence similarity 57 member A
221031_s_at	1.3e-07	1.2e-08	6.74432	9.42829	2.36604	2.36604	APOLD1	apolipoprotein L domain containing 1
213110_s_at	1.27e-07	1.17e-08	-6.75122	9.45346	-2.36577	2.36577	COL4A5	collagen type IV alpha 5 chain
201761_at	1.33e-13	1.74e-15	11.1598	25.0255	2.36544	2.36544	MTHFD2	methylenetetrahydrofolate dehydrogenase (NADP+ dependent) 2, methenyltetrahydrofolate cyclohydrolase
201567_s_at	2.26e-11	6.57e-13	-9.4364	19.1421	-0.759936	0.759936	GOLGA4	golgin A4
208764_s_at	2.26e-11	6.57e-13	9.43639	19.142	0.869748	0.869748	ATP5G2	ATP synthase, H+ transporting, mitochondrial Fo complex subunit C2 (subunit 9)
205697_at	0.000119	2.47e-05	4.62517	1.94883	2.36464	2.36464	SCGN	secretagogin, EF-hand calcium binding protein
1553030_a_at	2.29e-11	6.68e-13	-9.43185	19.1261	-0.98202	0.98202	SUOX	sulfite oxidase
1569290_s_at	4.35e-06	6.12e-07	-5.67123	5.55728	-2.3629	2.3629	GRIA3	glutamate ionotropic receptor AMPA type subunit 3
240983_s_at	9.91e-09	6.65e-10	7.52763	12.2863	2.36144	2.36144	CARS	cysteinyl-tRNA synthetase
213140_s_at	2.33e-11	6.82e-13	-9.42603	19.1056	-0.936507	0.936507	SS18L1	SS18L1, nBAF chromatin remodeling complex subunit
213412_at	1.41e-08	9.86e-10	-7.42074	11.8964	-2.36012	2.36012	TJP3	tight junction protein 3
211794_at	2.73e-11	8.19e-13	9.37446	18.9243	2.35776	2.35776	FYB	FYN binding protein
204712_at	4.84e-07	5.24e-08	-6.34391	7.97301	-2.35745	2.35745	WIF1	WNT inhibitory factor 1
228458_at	2.37e-11	6.95e-13	-9.42072	19.0869	-0.984818	0.984818	C6orf226	chromosome 6 open reading frame 226
203924_at	0.000105	2.16e-05	-4.66502	2.08144	-2.35665	2.35665	GSTA1	glutathione S-transferase alpha 1
221122_at	2.64e-12	5.58e-14	-10.1402	21.5872	-2.35664	2.35664	HRASLS2	HRAS like suppressor 2
244723_at	3.07e-10	1.3e-11	-8.60455	16.187	-2.35658	2.35658	ACSM2A	acyl-CoA synthetase medium-chain family member 2A
219634_at	1.85e-09	9.99e-11	8.04367	14.1632	2.35506	2.35506	CHST11	carbohydrate (chondroitin 4) sulfotransferase 11
216120_s_at	6.19e-07	6.88e-08	6.26992	7.70514	2.35478	2.35478	ATP2B2	ATPase plasma membrane Ca2+ transporting 2
211663_x_at	3.94e-07	4.17e-08	-6.40651	8.19994	-2.35465	2.35465	PTGDS	prostaglandin D2 synthase
222826_at	2.42e-11	7.1e-13	9.41451	19.0652	0.993826	0.993826	BLOC1S6	biogenesis of lysosomal organelles complex 1 subunit 6
216236_s_at	6.34e-10	2.97e-11	8.37607	15.3651	2.35213	2.35213	SLC2A14///SLC2A3	solute carrier family 2 member 14///solute carrier family 2 member 3
202403_s_at	6.33e-09	4.02e-10	7.6644	12.7847	2.35207	2.35207	COL1A2	collagen type I alpha 2 chain
236840_at	4.22e-06	5.9e-07	-5.68121	5.59273	-2.35126	2.35126	C12orf56	chromosome 12 open reading frame 56
206332_s_at	5.17e-17	8.71e-20	14.3134	34.8003	2.34977	2.34977	IFI16	interferon gamma inducible protein 16
204152_s_at	2.16e-11	6.28e-13	9.44915	19.1868	2.34911	2.34911	MFNG	MFNG O-fucosylpeptide 3-beta-N-acetylglucosaminyltransferase
203323_at	3.3e-14	3.23e-16	11.6678	26.689	2.34805	2.34805	CAV2	caveolin 2
210997_at	0.000176	3.81e-05	4.49783	1.52837	2.34764	2.34764	HGF	hepatocyte growth factor
205898_at	1.07e-09	5.37e-11	8.21327	14.7773	2.34738	2.34738	CX3CR1	C-X3-C motif chemokine receptor 1
1552703_s_at	4.22e-14	4.37e-16	11.5757	26.3898	2.34717	2.34717	CARD16///CASP1	caspase recruitment domain family member 16///caspase 1
241694_at	3.34e-09	1.95e-10	-7.86163	13.5023	-2.34705	2.34705	PKHD1	polycystic kidney and hepatic disease 1 (autosomal recessive)
211549_s_at	5.8e-09	3.63e-10	-7.69197	12.8851	-2.34681	2.34681	HPGD	hydroxyprostaglandin dehydrogenase 15-(NAD)
219789_at	8.27e-09	5.44e-10	-7.58196	12.4843	-2.34625	2.34625	NPR3	natriuretic peptide receptor 3
201137_s_at	1.26e-13	1.63e-15	11.1782	25.0864	2.34536	2.34536	HLA-DPB1	major histocompatibility complex, class II, DP beta 1
209906_at	5.69e-13	9.4e-15	10.6586	23.3515	2.34514	2.34514	C3AR1	complement component 3a receptor 1
215692_s_at	2.37e-11	6.96e-13	-9.42028	19.0854	-2.34493	2.34493	MPPED2	metallophosphoesterase domain containing 2
201666_at	2.44e-14	2.24e-16	11.7804	27.0532	2.34388	2.34388	TIMP1	TIMP metallopeptidase inhibitor 1
205175_s_at	3.19e-05	5.64e-06	-5.04996	3.38472	-2.34186	2.34186	KHK	ketohexokinase
230802_at	1.05e-11	2.71e-13	-9.68741	20.0204	-2.34155	2.34155	ARHGAP24	Rho GTPase activating protein 24
230962_at	2.85e-06	3.81e-07	5.80178	6.02207	2.34076	2.34076	DCLK1	doublecortin like kinase 1
1556263_s_at	0.000291	6.75e-05	-4.32857	0.977591	-2.33967	2.33967	LOC101928818///PWRN1	uncharacterized LOC101928818///Prader-Willi region non-protein coding RNA 1
204174_at	1.93e-15	9.55e-18	12.7664	30.1701	2.3394	2.3394	ALOX5AP	arachidonate 5-lipoxygenase activating protein
221123_x_at	3.48e-12	7.64e-14	10.0495	21.2753	2.33901	2.33901	FBXO16///ZNF395	F-box protein 16///zinc finger protein 395
230320_at	2.67e-11	7.97e-13	-9.38213	18.9513	-0.949248	0.949248	TBRG1	transforming growth factor beta regulator 1
212658_at	2.96e-14	2.84e-16	11.7068	26.8154	2.33845	2.33845	LHFPL2	lipoma HMGIC fusion partner-like 2
229543_at	1.89e-11	5.39e-13	9.49264	19.3394	2.33829	2.33829	FAM26F	family with sequence similarity 26 member F
220161_s_at	2.4e-09	1.34e-10	-7.96308	13.8708	-2.33805	2.33805	EPB41L4B	erythrocyte membrane protein band 4.1 like 4B
205763_s_at	2.73e-11	8.18e-13	9.37488	18.9258	0.928368	0.928368	DDX18	DEAD-box helicase 18
1557918_s_at	7.03e-10	3.33e-11	8.34426	15.2504	2.33663	2.33663	SLC16A1	solute carrier family 16 member 1
227211_at	5.75e-08	4.81e-09	6.9916	10.3301	2.33657	2.33657	PHF19	PHD finger protein 19
221567_at	4.19e-15	2.51e-17	12.4603	29.2163	2.33224	2.33224	NOL3	nucleolar protein 3
207467_x_at	2.77e-11	8.31e-13	9.37032	18.9097	0.937124	0.937124	CAST	calpastatin
205291_at	2.27e-10	9.16e-12	8.70026	16.5301	2.33203	2.33203	IL2RB	interleukin 2 receptor subunit beta
228362_s_at	9.47e-08	8.39e-09	6.84094	9.78049	2.33145	2.33145	FAM26F	family with sequence similarity 26 member F
222943_at	6.15e-05	1.18e-05	-4.83916	2.6662	-2.33083	2.33083	GBA3	glucosylceramidase beta 3 (gene/pseudogene)
239457_at	0.00027	6.2e-05	4.35402	1.05979	2.33062	2.33062	ATP8B3	ATPase phospholipid transporting 8B3
208096_s_at	1.29e-07	1.19e-08	6.7468	9.43732	2.33001	2.33001	COL21A1	collagen type XXI alpha 1 chain
205325_at	5.06e-09	3.13e-10	-7.73243	13.0324	-2.32989	2.32989	PHYHIP	phytanoyl-CoA 2-hydroxylase interacting protein
205624_at	5.23e-06	7.5e-07	5.61495	5.35768	2.32799	2.32799	CPA3	carboxypeptidase A3
208711_s_at	1.56e-11	4.33e-13	9.55463	19.5566	2.32797	2.32797	CCND1	cyclin D1
203071_at	1.98e-10	7.85e-12	-8.74298	16.683	-2.3275	2.3275	MIR6872///SEMA3B	microRNA 6872///semaphorin 3B
214845_s_at	8.87e-12	2.23e-13	9.74249	20.2122	2.32743	2.32743	CALU	calumenin
202990_at	5.05e-16	1.82e-18	13.3017	31.8081	2.3263	2.3263	PYGL	phosphorylase, glycogen, liver
233882_s_at	2.12e-09	1.17e-10	-8.00116	14.009	-2.32548	2.32548	SEMA6D	semaphorin 6D
213418_at	2.77e-08	2.1e-09	7.21552	11.1475	2.32546	2.32546	HSPA6	heat shock protein family A (Hsp70) member 6
203085_s_at	5.46e-16	2.04e-18	13.2637	31.6929	2.32469	2.32469	TGFB1	transforming growth factor beta 1
204822_at	7.17e-07	8.11e-08	6.22524	7.54358	2.32428	2.32428	TTK	TTK protein kinase
203416_at	1.24e-16	2.75e-19	13.9248	33.6669	2.32383	2.32383	CD53	CD53 molecule
216010_x_at	1.45e-09	7.6e-11	-8.11826	14.4335	-2.32382	2.32382	FUT3	fucosyltransferase 3 (Lewis blood group)
204354_at	3.01e-11	9.12e-13	9.34407	18.8173	0.925685	0.925685	POT1	protection of telomeres 1
207429_at	0.000868	0.00023	-3.955	-0.201213	-2.32354	2.32354	SLC22A2	solute carrier family 22 member 2
203287_at	2.54e-12	5.35e-14	-10.1524	21.629	-2.32306	2.32306	LAD1	ladinin 1
228997_at	7.69e-09	5.01e-10	7.60453	12.5666	2.32152	2.32152	TRNAU1AP	tRNA selenocysteine 1 associated protein 1
222958_s_at	5.13e-08	4.23e-09	7.02638	10.457	2.32078	2.32078	DEPDC1	DEP domain containing 1
205285_s_at	1.98e-09	1.08e-10	8.02349	14.09	2.32001	2.32001	FYB	FYN binding protein
208747_s_at	2.63e-11	7.85e-13	9.38638	18.9662	2.31984	2.31984	C1S	complement component 1, s subcomponent
218078_s_at	3.04e-11	9.28e-13	-9.3393	18.8005	-0.819383	0.819383	ZDHHC3	zinc finger DHHC-type containing 3
202989_at	7.31e-06	1.09e-06	5.51067	4.98913	2.31968	2.31968	RGS1	regulator of G-protein signaling 1
238581_at	1.17e-06	1.4e-07	6.07568	7.00409	2.31888	2.31888	GBP5	guanylate binding protein 5
238551_at	3.11e-13	4.65e-15	10.8663	24.0491	2.31882	2.31882	FUT11	fucosyltransferase 11
210146_x_at	3.48e-09	2.03e-10	7.84955	13.4584	2.31873	2.31873	LILRB2	leukocyte immunoglobulin like receptor B2
239860_at	7.78e-06	1.17e-06	-5.4907	4.91876	-2.31729	2.31729	LOC100130232	LP2209
243386_at	6.21e-13	1.04e-14	-10.6304	23.2562	-2.31723	2.31723	CASZ1	castor zinc finger 1
229296_at	2.93e-08	2.24e-09	-7.19874	11.0862	-2.31679	2.31679	LINC01503	long intergenic non-protein coding RNA 1503
219434_at	1.63e-05	2.68e-06	5.26027	4.11186	2.31609	2.31609	TREM1	triggering receptor expressed on myeloid cells 1
226594_at	7.9e-13	1.37e-14	-10.5481	22.9783	-2.31466	2.31466	ENTPD5	ectonucleoside triphosphate diphosphohydrolase 5
217562_at	3.59e-06	4.93e-07	-5.73117	5.7704	-2.31412	2.31412	BRINP3	BMP/retinoic acid inducible neural specific 3
205710_at	2.77e-06	3.68e-07	-5.81133	6.05615	-2.3141	2.3141	LRP2	LDL receptor related protein 2
222976_s_at	3.3e-11	1.01e-12	9.31462	18.7135	0.774509	0.774509	TPM3	tropomyosin 3
209335_at	3.87e-07	4.08e-08	-6.41212	8.22027	-2.31392	2.31392	DCN	decorin
225159_s_at	3.33e-11	1.02e-12	9.31125	18.7017	0.783842	0.783842	ELK4	ELK4, ETS transcription factor
206239_s_at	8.62e-05	1.72e-05	-4.73033	2.29976	-2.3138	2.3138	SPINK1	serine peptidase inhibitor, Kazal type 1
224570_s_at	3.37e-11	1.04e-12	9.30776	18.6894	0.75302	0.75302	IRF2BP2	interferon regulatory factor 2 binding protein 2
1556469_s_at	1.03e-06	1.22e-07	-6.11481	7.14502	-2.31317	2.31317	LOC105376166	uncharacterized LOC105376166
226610_at	4.62e-06	6.54e-07	-5.65306	5.49277	-2.31297	2.31297	CENPV	centromere protein V
211864_s_at	3.02e-12	6.52e-14	10.0951	21.4323	2.31231	2.31231	MYOF	myoferlin
202022_at	3.92e-12	8.79e-14	10.0093	21.1368	2.30993	2.30993	ALDOC	aldolase, fructose-bisphosphate C
229337_at	3.54e-10	1.52e-11	-8.55966	16.0258	-2.30949	2.30949	USP2	ubiquitin specific peptidase 2
210206_s_at	8.8e-09	5.83e-10	7.5632	12.4159	2.309	2.309	DDX11	DEAD/H-box helicase 11
211422_at	1e-08	6.74e-10	-7.52394	12.2728	-2.30831	2.30831	TRPM3	transient receptor potential cation channel subfamily M member 3
236430_at	0.000362	8.61e-05	-4.25537	0.742449	-2.30811	2.30811	TMED6	transmembrane p24 trafficking protein 6
206513_at	2.96e-07	3.02e-08	6.4934	8.51532	2.30684	2.30684	AIM2	absent in melanoma 2
222891_s_at	7.61e-07	8.67e-08	6.20698	7.47761	2.3064	2.3064	BCL11A	B-cell CLL/lymphoma 11A
1560885_x_at	2.37e-05	4.06e-06	-5.14322	3.70599	-2.30629	2.30629	SLC17A1	solute carrier family 17 member 1
209727_at	4.3e-09	2.6e-10	7.78286	13.2159	2.30604	2.30604	GM2A	GM2 ganglioside activator
227606_s_at	6.99e-16	2.85e-18	13.155	31.3628	2.30555	2.30555	STAMBPL1	STAM binding protein like 1
238021_s_at	4.31e-10	1.91e-11	8.49747	15.8023	2.30547	2.30547	CRNDE	colorectal neoplasia differentially expressed (non-protein coding)
220276_at	8.77e-05	1.76e-05	-4.72457	2.28046	-2.30502	2.30502	RERGL	RERG like
1555500_s_at	1.03e-14	7.68e-17	-12.1103	28.1105	-2.30496	2.30496	SLC2A4RG	SLC2A4 regulator
239983_at	3.51e-09	2.06e-10	-7.84664	13.4479	-2.30477	2.30477	SLC30A8	solute carrier family 30 member 8
213168_at	3.66e-11	1.14e-12	9.28148	18.5967	0.801123	0.801123	SP3	Sp3 transcription factor
223858_at	1.41e-10	5.32e-12	-8.85093	17.0688	-2.30413	2.30413	ESRRB	estrogen related receptor beta
218687_s_at	1.53e-07	1.43e-08	-6.69572	9.25127	-2.30373	2.30373	MUC13	mucin 13, cell surface associated
204588_s_at	4.24e-10	1.87e-11	-8.50324	15.8231	-2.30233	2.30233	SLC7A7	solute carrier family 7 member 7
227295_at	4.98e-15	3.1e-17	12.3933	29.0058	2.30112	2.30112	IKBIP	IKBKB interacting protein
242543_at	1.2e-09	6.09e-11	-8.17884	14.6528	-2.30026	2.30026	SH2D6	SH2 domain containing 6
1560526_at	4.33e-05	7.99e-06	-4.95109	3.04635	-2.29988	2.29988	MAGI2-IT1	MAGI2 intronic transcript 1
220731_s_at	3.92e-11	1.23e-12	9.26103	18.5245	0.957103	0.957103	NECAP2	NECAP endocytosis associated 2
210321_at	3.58e-10	1.55e-11	8.55495	16.0089	2.29907	2.29907	GZMH	granzyme H
202712_s_at	4.45e-09	2.71e-10	-7.77195	13.1762	-2.29867	2.29867	CKMT1A///CKMT1B	creatine kinase, mitochondrial 1A///creatine kinase, mitochondrial 1B
229045_at	1.26e-07	1.16e-08	6.7539	9.46322	2.29857	2.29857	SNX20	sorting nexin 20
231232_at	8.62e-08	7.55e-09	-6.86953	9.88475	-2.29792	2.29792	LOC100506125	uncharacterized LOC100506125
229599_at	4.34e-09	2.63e-10	-7.77993	13.2053	-2.29746	2.29746	SMIM22	small integral membrane protein 22
211116_at	6.96e-07	7.85e-08	-6.23409	7.57555	-2.29651	2.29651	SLC9A2	solute carrier family 9 member A2
244151_at	1.07e-10	3.87e-12	-8.93948	17.3844	-2.29564	2.29564	SMLR1	small leucine rich protein 1
202564_x_at	4e-11	1.26e-12	-9.25369	18.4986	-0.965533	0.965533	ARL2	ADP ribosylation factor like GTPase 2
213061_s_at	4.01e-11	1.26e-12	9.25322	18.4969	0.898328	0.898328	NTAN1	N-terminal asparagine amidase
237942_at	1.24e-08	8.49e-10	-7.46151	12.0452	-2.2956	2.2956	SNRK-AS1	SNRK antisense RNA 1
1553722_s_at	1.37e-09	7.1e-11	-8.1371	14.5017	-2.29555	2.29555	RNF152	ring finger protein 152
210832_x_at	8.58e-08	7.5e-09	-6.8713	9.89121	-2.29549	2.29549	PTGER3	prostaglandin E receptor 3
208434_at	6.28e-07	6.98e-08	-6.26598	7.69087	-2.29362	2.29362	MECOM	MDS1 and EVI1 complex locus
205789_at	3.74e-12	8.35e-14	10.024	21.1875	2.29305	2.29305	CD1D	CD1d molecule
231729_s_at	1.27e-07	1.17e-08	-6.75011	9.44941	-2.29271	2.29271	CAPS	calcyphosine
204336_s_at	4.16e-11	1.31e-12	9.24147	18.4554	0.997167	0.997167	RGS19	regulator of G-protein signaling 19
228621_at	2.35e-09	1.31e-10	-7.97015	13.8965	-2.2925	2.2925	HFE2	hemochromatosis type 2 (juvenile)
1556499_s_at	3.13e-08	2.42e-09	7.17799	11.0105	2.2915	2.2915	COL1A1	collagen type I alpha 1 chain
228964_at	3.39e-14	3.36e-16	11.6557	26.6496	2.29073	2.29073	PRDM1	PR/SET domain 1
210064_s_at	5.03e-09	3.1e-10	-7.73466	13.0405	-2.2903	2.2903	UPK1B	uroplakin 1B
233047_at	2.37e-08	1.76e-09	-7.26329	11.3219	-2.29019	2.29019	FRMD7	FERM domain containing 7
233500_x_at	3.85e-09	2.29e-10	7.81729	13.3412	2.28973	2.28973	CLEC2D	C-type lectin domain family 2 member D
211210_x_at	2.55e-08	1.92e-09	7.24063	11.2391	2.28947	2.28947	SH2D1A	SH2 domain containing 1A
233979_s_at	1.16e-08	7.92e-10	-7.4803	12.1137	-2.28925	2.28925	ESPN	espin
206617_s_at	1.33e-09	6.85e-11	-8.14677	14.5367	-2.28923	2.28923	RENBP	renin binding protein
216191_s_at	3.91e-06	5.41e-07	5.70519	5.67797	2.28885	2.28885	TRDV3	T cell receptor delta variable 3
230519_at	5.24e-08	4.33e-09	-7.02005	10.4339	-2.28865	2.28865	FAM124A	family with sequence similarity 124 member A
209047_at	1.43e-08	1e-09	-7.41635	11.8804	-2.28783	2.28783	AQP1	aquaporin 1 (Colton blood group)
229596_at	7.97e-08	6.92e-09	-6.89327	9.97133	-2.28742	2.28742	AMDHD1	amidohydrolase domain containing 1
206535_at	0.000155	3.31e-05	-4.53975	1.66623	-2.28656	2.28656	SLC2A2	solute carrier family 2 member 2
231981_at	5e-14	5.38e-16	-11.5126	26.1842	-2.28624	2.28624	PRLR	prolactin receptor
226535_at	2.36e-05	4.06e-06	-5.14329	3.70625	-2.28592	2.28592	LOC100505984///ITGB6	uncharacterized LOC100505984///integrin subunit beta 6
1552807_a_at	6.8e-12	1.64e-13	9.83052	20.5181	2.2848	2.2848	SIGLEC10	sialic acid binding Ig like lectin 10
244352_at	1.19e-12	2.22e-14	10.408	22.5026	2.28437	2.28437	CD84	CD84 molecule
209763_at	0.000134	2.82e-05	-4.58637	1.82021	-2.28394	2.28394	CHRDL1	chordin like 1
205447_s_at	2.3e-11	6.7e-13	9.431	19.1231	2.28339	2.28339	MAP3K12	mitogen-activated protein kinase kinase kinase 12
214452_at	2.54e-06	3.35e-07	5.83742	6.14932	2.28335	2.28335	BCAT1	branched chain amino acid transaminase 1
205589_at	3.48e-07	3.61e-08	-6.44505	8.33978	-2.28209	2.28209	MYL3	myosin light chain 3
209734_at	1.01e-10	3.62e-12	8.95776	17.4495	2.28135	2.28135	NCKAP1L	NCK associated protein 1 like
239572_at	3.43e-08	2.67e-09	-7.15055	10.9103	-2.28076	2.28076	GJA3	gap junction protein alpha 3
215834_x_at	1.35e-08	9.36e-10	7.43504	11.9486	2.27999	2.27999	SCARB1	scavenger receptor class B member 1
207327_at	6.62e-07	7.43e-08	-6.24926	7.63042	-2.27998	2.27998	EYA4	EYA transcriptional coactivator and phosphatase 4
205504_at	2.38e-12	4.95e-14	10.1746	21.7052	2.27919	2.27919	BTK	Bruton tyrosine kinase
226818_at	8.23e-14	9.66e-16	11.3357	25.6052	2.27904	2.27904	MPEG1	macrophage expressed 1
204379_s_at	2.8e-08	2.13e-09	-7.21238	11.136	-2.27897	2.27897	FGFR3	fibroblast growth factor receptor 3
1569555_at	5.25e-08	4.34e-09	-7.01953	10.432	-2.27867	2.27867	GDA	guanine deaminase
234480_at	4.56e-07	4.91e-08	-6.36157	8.03697	-2.27726	2.27726	DKFZP761C1711	uncharacterized protein DKFZp761C1711
200037_s_at	4.89e-11	1.58e-12	9.19052	18.2753	0.777834	0.777834	CBX3	chromobox 3
206043_s_at	3.77e-12	8.42e-14	-10.0217	21.1795	-2.27715	2.27715	ATP2C2	ATPase secretory pathway Ca2+ transporting 2
206171_at	8.43e-13	1.47e-14	10.5269	22.9063	2.27697	2.27697	ADORA3	adenosine A3 receptor
226963_at	4.94e-11	1.6e-12	9.18691	18.2626	0.812443	0.812443	BTF3L4	basic transcription factor 3 like 4
231325_at	1.53e-06	1.9e-07	-5.99262	6.70539	-2.27688	2.27688	UNC5D	unc-5 netrin receptor D
206385_s_at	7.23e-06	1.08e-06	-5.5142	5.00157	-2.2766	2.2766	ANK3	ankyrin 3, node of Ranvier (ankyrin G)
205691_at	5.53e-06	8e-07	-5.59738	5.29547	-2.2759	2.2759	SYNGR3	synaptogyrin 3
207651_at	2.01e-07	1.95e-08	6.61223	8.94732	2.27521	2.27521	GPR171	G protein-coupled receptor 171
216074_x_at	2.76e-06	3.68e-07	-5.81153	6.05687	-2.27424	2.27424	WWC1	WW and C2 domain containing 1
223700_at	4.74e-06	6.72e-07	5.64527	5.46517	2.27396	2.27396	MND1	meiotic nuclear divisions 1
201389_at	8.37e-11	2.92e-12	9.01799	17.6636	2.27328	2.27328	ITGA5	integrin subunit alpha 5
204639_at	3.97e-11	1.24e-12	9.25677	18.5095	2.27323	2.27323	ADA	adenosine deaminase
228918_at	1.1e-11	2.87e-13	-9.67108	19.9635	-2.27293	2.27293	SLC43A2	solute carrier family 43 member 2
1554837_a_at	7.03e-11	2.37e-12	-9.07608	17.8699	-2.27291	2.27291	CYP4A22///CYP4A11	cytochrome P450 family 4 subfamily A member 22///cytochrome P450 family 4 subfamily A member 11
212858_at	8.17e-09	5.37e-10	7.58571	12.498	2.27222	2.27222	PAQR4	progestin and adipoQ receptor family member 4
213010_at	1.84e-14	1.56e-16	11.8914	27.4105	2.27214	2.27214	PRKCDBP	protein kinase C delta binding protein
213954_at	1e-11	2.57e-13	-9.70215	20.0717	-2.27106	2.27106	FAM169A	family with sequence similarity 169 member A
217747_s_at	5.44e-11	1.77e-12	9.15767	18.1591	0.749007	0.749007	RPS9	ribosomal protein S9
201376_s_at	5.44e-11	1.77e-12	9.15719	18.1574	0.941771	0.941771	HNRNPF	heterogeneous nuclear ribonucleoprotein F
226015_at	5.44e-11	1.77e-12	9.15716	18.1573	0.68865	0.68865	ZNF12	zinc finger protein 12
217773_s_at	5.44e-11	1.78e-12	-9.15695	18.1565	-0.901982	0.901982	NDUFA4	NDUFA4, mitochondrial complex associated
214490_at	5.45e-07	5.98e-08	-6.30814	7.84345	-2.27066	2.27066	ARSF	arylsulfatase F
212248_at	5.49e-11	1.8e-12	9.1539	18.1457	0.845773	0.845773	MTDH	metadherin
205345_at	1.36e-07	1.27e-08	6.72866	9.37126	2.27026	2.27026	BARD1	BRCA1 associated RING domain 1
213034_at	5.59e-11	1.83e-12	-9.14851	18.1266	-0.841908	0.841908	SIK3	SIK family kinase 3
224893_at	5.6e-11	1.83e-12	9.148	18.1249	0.840421	0.840421	ATL3	atlastin GTPase 3
239921_at	1.66e-06	2.07e-07	-5.969	6.6206	-2.27018	2.27018	COL28A1	collagen type XXVIII alpha 1 chain
218658_s_at	5.61e-11	1.84e-12	-9.14713	18.1218	-0.940363	0.940363	ACTR8	ARP8 actin-related protein 8 homolog
228056_s_at	1.45e-06	1.79e-07	6.0092	6.76494	2.27001	2.27001	NAPSB	napsin B aspartic peptidase, pseudogene
201116_s_at	2.12e-06	2.73e-07	5.89373	6.35075	2.26964	2.26964	CPE	carboxypeptidase E
224953_at	5.69e-11	1.87e-12	9.14248	18.1053	0.921173	0.921173	YIPF5	Yip1 domain family member 5
220507_s_at	9.49e-06	1.47e-06	-5.42892	4.70147	-2.26954	2.26954	UPB1	beta-ureidopropionase 1
1552717_s_at	5.42e-10	2.47e-11	8.4271	15.549	2.26937	2.26937	CEP170P1///CEP170	centrosomal protein 170 pseudogene 1///centrosomal protein 170
209835_x_at	3.33e-10	1.42e-11	8.57866	16.0941	2.26924	2.26924	CD44	CD44 molecule (Indian blood group)
215686_x_at	3.83e-07	4.03e-08	-6.41548	8.23245	-2.26917	2.26917	TFAP2B	transcription factor AP-2 beta
211162_x_at	1.64e-07	1.55e-08	6.67385	9.1716	2.26823	2.26823	SCD	stearoyl-CoA desaturase
200936_at	5.95e-11	1.96e-12	9.12908	18.0578	0.721179	0.721179	RPL8	ribosomal protein L8
218261_at	1.75e-12	3.45e-14	-10.2792	22.0633	-2.26797	2.26797	AP1M2	adaptor related protein complex 1 mu 2 subunit
204912_at	5.66e-15	3.63e-17	12.3445	28.8521	2.26586	2.26586	IL10RA	interleukin 10 receptor subunit alpha
230914_at	9.89e-07	1.16e-07	-6.12692	7.18868	-2.26577	2.26577	HNF4A	hepatocyte nuclear factor 4 alpha
236359_at	0.00018	3.94e-05	4.48835	1.49727	2.26559	2.26559	SCN4B	sodium voltage-gated channel beta subunit 4
219250_s_at	1.45e-05	2.36e-06	-5.29592	4.23605	-2.26549	2.26549	FLRT3	fibronectin leucine rich transmembrane protein 3
241068_at	1.3e-08	9.02e-10	7.44498	11.9849	2.2649	2.2649	IGSF6	immunoglobulin superfamily member 6
1555310_a_at	4.34e-15	2.64e-17	-12.4439	29.165	-2.26472	2.26472	PAK6	p21 (RAC1) activated kinase 6
65517_at	2.59e-13	3.76e-15	-10.9295	24.2602	-2.26439	2.26439	AP1M2	adaptor related protein complex 1 mu 2 subunit
205471_s_at	4.83e-13	7.87e-15	-10.7108	23.5273	-2.26431	2.26431	DACH1	dachshund family transcription factor 1
220132_s_at	2.53e-07	2.53e-08	6.54204	8.69207	2.26427	2.26427	CLEC2D	C-type lectin domain family 2 member D
216600_x_at	4.31e-15	2.61e-17	-12.448	29.1779	-2.26403	2.26403	ALDOB	aldolase, fructose-bisphosphate B
238756_at	3.41e-11	1.06e-12	9.30305	18.6727	2.26238	2.26238	GAS2L3	growth arrest specific 2 like 3
218905_at	6.41e-11	2.13e-12	9.1064	17.9775	0.846339	0.846339	INTS8	integrator complex subunit 8
225578_at	6.41e-11	2.13e-12	9.10614	17.9765	0.999835	0.999835	MZT1	mitotic spindle organizing protein 1
213767_at	4.45e-06	6.27e-07	5.66453	5.53352	2.26207	2.26207	KSR1	kinase suppressor of ras 1
216011_at	1.8e-08	1.29e-09	-7.34788	11.6306	-2.26146	2.26146	SLC39A9	solute carrier family 39 member 9
204146_at	7.5e-10	3.58e-11	8.32459	15.1794	2.26146	2.26146	RAD51AP1	RAD51 associated protein 1
202597_at	1.01e-08	6.83e-10	-7.52048	12.2602	-2.26126	2.26126	IRF6	interferon regulatory factor 6
208821_at	6.47e-11	2.16e-12	9.10282	17.9647	0.945873	0.945873	SNRPB	small nuclear ribonucleoprotein polypeptides B and B1
211924_s_at	2.1e-07	2.05e-08	6.59849	8.89734	2.26117	2.26117	PLAUR	plasminogen activator, urokinase receptor
224569_s_at	6.53e-11	2.18e-12	9.09947	17.9529	0.850957	0.850957	IRF2BP2	interferon regulatory factor 2 binding protein 2
200705_s_at	6.55e-11	2.19e-12	9.09884	17.9507	0.877303	0.877303	SNORA41///EEF1B2	small nucleolar RNA, H/ACA box 41///eukaryotic translation elongation factor 1 beta 2
201743_at	2.19e-14	1.97e-16	11.819	27.1777	2.26102	2.26102	CD14	CD14 molecule
226711_at	6.62e-11	2.21e-12	9.09557	17.9391	0.799541	0.799541	FOXN2	forkhead box N2
216893_s_at	8.63e-08	7.56e-09	-6.86931	9.88395	-2.26097	2.26097	COL4A3	collagen type IV alpha 3 chain
200652_at	6.74e-11	2.26e-12	9.0901	17.9196	0.781576	0.781576	SSR2	signal sequence receptor subunit 2
209183_s_at	6.78e-13	1.15e-14	10.6003	23.1547	2.25911	2.25911	C10orf10	chromosome 10 open reading frame 10
223189_x_at	6.76e-11	2.26e-12	9.08898	17.9157	0.76512	0.76512	KMT2E	lysine methyltransferase 2E
222379_at	8.87e-10	4.34e-11	8.27189	14.9892	2.25888	2.25888	KCNE4	potassium voltage-gated channel subfamily E regulatory subunit 4
206016_at	6.8e-11	2.28e-12	9.08686	17.9081	0.936863	0.936863	CCDC22	coiled-coil domain containing 22
221801_x_at	0.000395	9.49e-05	4.22599	0.648614	2.25845	2.25845	NEFL	neurofilament, light polypeptide
223533_at	5.65e-11	1.86e-12	9.14462	18.1129	2.25831	2.25831	LOC101927933///LRRC8C	uncharacterized LOC101927933///leucine rich repeat containing 8 family member C
205476_at	0.00987	0.00368	3.03986	-2.82077	2.25795	2.25795	CCL20	C-C motif chemokine ligand 20
203358_s_at	5.11e-08	4.2e-09	7.02813	10.4634	2.25718	2.25718	EZH2	enhancer of zeste 2 polycomb repressive complex 2 subunit
225285_at	1.47e-08	1.03e-09	7.40897	11.8535	2.25649	2.25649	BCAT1	branched chain amino acid transaminase 1
1559590_at	5.8e-07	6.4e-08	-6.28971	7.77674	-2.25622	2.25622	CHDH	choline dehydrogenase
229024_at	3.95e-14	4.03e-16	-11.6003	26.4698	-2.25321	2.25321	RNF150	ring finger protein 150
213380_x_at	3.77e-08	2.98e-09	-7.12163	10.8047	-2.25235	2.25235	LOC102724562///MST1L///MST1P2///MST1	macrophage stimulating 1 pseudogene///macrophage stimulating 1 like///macrophage stimulating 1 pseudogene 2///macrophage stimulating 1
229723_at	8.35e-14	9.83e-16	11.3304	25.5877	2.25201	2.25201	TAGAP	T-cell activation RhoGTPase activating protein
77508_r_at	7.06e-11	2.38e-12	-9.07473	17.8651	-0.956317	0.956317	RABEP2	rabaptin, RAB GTPase binding effector protein 2
210371_s_at	7.13e-11	2.41e-12	9.07165	17.8542	0.932522	0.932522	RBBP4	RB binding protein 4, chromatin remodeling factor
212063_at	4.38e-12	9.93e-14	9.97433	21.016	2.25082	2.25082	CD44	CD44 molecule (Indian blood group)
227354_at	5.86e-17	1.02e-19	14.2589	34.6425	2.25016	2.25016	PAG1	phosphoprotein membrane anchor with glycosphingolipid microdomains 1
217865_at	7.14e-11	2.42e-12	9.07094	17.8517	0.797976	0.797976	RNF130	ring finger protein 130
205259_at	2.64e-08	1.99e-09	-7.23085	11.2034	-2.24995	2.24995	NR3C2	nuclear receptor subfamily 3 group C member 2
202391_at	1.09e-08	7.39e-10	7.49916	12.1825	2.24945	2.24945	BASP1	brain abundant membrane attached signal protein 1
215925_s_at	1.7e-09	9.05e-11	8.07061	14.2609	2.24928	2.24928	CD72	CD72 molecule
226219_at	3.54e-15	2.07e-17	12.5212	29.4072	2.24896	2.24896	ARHGAP30	Rho GTPase activating protein 30
214617_at	4.3e-11	1.36e-12	9.23131	18.4195	2.24882	2.24882	PRF1	perforin 1
203554_x_at	3.37e-12	7.37e-14	10.06	21.3113	2.24837	2.24837	PTTG1	pituitary tumor-transforming 1
242694_at	8.63e-05	1.72e-05	-4.73004	2.29877	-2.24607	2.24607	IQSEC3	IQ motif and Sec7 domain 3
219457_s_at	6.87e-10	3.24e-11	8.35178	15.2776	2.24576	2.24576	RIN3	Ras and Rab interactor 3
205988_at	6.69e-14	7.51e-16	11.4118	25.8547	2.24565	2.24565	CD84	CD84 molecule
218355_at	3.76e-10	1.64e-11	8.53896	15.9515	2.24535	2.24535	KIF4A	kinesin family member 4A
220005_at	2.2e-11	6.4e-13	9.44402	19.1688	2.24478	2.24478	P2RY13	purinergic receptor P2Y13
206527_at	1.88e-17	2.23e-20	-14.7814	36.1396	-2.24428	2.24428	ABAT	4-aminobutyrate aminotransferase
209263_x_at	7.38e-11	2.52e-12	9.05954	17.8112	0.8174	0.8174	TSPAN4	tetraspanin 4
224068_x_at	7.44e-11	2.54e-12	9.05703	17.8023	0.696792	0.696792	RBM22	RNA binding motif protein 22
226215_s_at	7.44e-11	2.54e-12	9.05688	17.8018	0.96685	0.96685	KDM2B	lysine demethylase 2B
221572_s_at	6.02e-11	1.99e-12	-9.12513	18.0438	-2.24427	2.24427	MIR6824///SLC26A6	microRNA 6824///solute carrier family 26 member 6
232024_at	1.2e-12	2.22e-14	10.4069	22.4989	2.24412	2.24412	GIMAP2	GTPase, IMAP family member 2
210432_s_at	0.001	0.000271	-3.90368	-0.358807	-2.24402	2.24402	SCN3A	sodium voltage-gated channel alpha subunit 3
1559883_s_at	6.06e-10	2.81e-11	8.39094	15.4187	2.24381	2.24381	SAMHD1	SAM and HD domain containing deoxynucleoside triphosphate triphosphohydrolase 1
200875_s_at	7.56e-11	2.59e-12	9.05152	17.7827	0.88851	0.88851	MIR1292///SNORD110///SNORD86///SNORD57///NOP56	microRNA 1292///small nucleolar RNA, C/D box 110///small nucleolar RNA, C/D box 86///small nucleolar RNA, C/D box 57///NOP56 ribonucleoprotein
222936_s_at	1.1e-07	9.99e-09	6.79378	9.60854	2.24335	2.24335	DESI2	desumoylating isopeptidase 2
228400_at	7.95e-06	1.2e-06	-5.48443	4.89667	-2.24329	2.24329	SHROOM3	shroom family member 3
226841_at	7.49e-12	1.84e-13	9.79761	20.4039	2.24259	2.24259	MPEG1	macrophage expressed 1
239350_at	1.94e-09	1.05e-10	-8.02878	14.1092	-2.2419	2.2419	MARVELD3	MARVEL domain containing 3
201564_s_at	2.96e-09	1.7e-10	7.89832	13.6357	2.24187	2.24187	FSCN1	fascin actin-bundling protein 1
213589_s_at	2.72e-07	2.75e-08	6.5192	8.60907	2.2417	2.2417	B3GNTL1	UDP-GlcNAc:betaGal beta-1,3-N-acetylglucosaminyltransferase-like 1
218288_s_at	7.7e-11	2.65e-12	9.04545	17.7612	0.861925	0.861925	CCDC90B	coiled-coil domain containing 90B
228320_x_at	3.69e-10	1.61e-11	-8.54458	15.9717	-2.24114	2.24114	BICDL1	BICD family like cargo adaptor 1
201668_x_at	7.02e-14	8.01e-16	11.3923	25.791	2.24022	2.24022	MARCKS	myristoylated alanine rich protein kinase C substrate
210399_x_at	7.34e-11	2.5e-12	-9.06091	17.8161	-2.23986	2.23986	FUT6	fucosyltransferase 6
210355_at	4.89e-05	9.11e-06	4.91338	2.91791	2.23935	2.23935	PTHLH	parathyroid hormone like hormone
218134_s_at	8e-11	2.76e-12	9.03407	17.7208	0.93969	0.93969	RBM22	RNA binding motif protein 22
226591_at	2.16e-11	6.28e-13	-9.44909	19.1866	-2.23901	2.23901	PWAR6	Prader Willi/Angelman region RNA 6
230664_at	2.88e-07	2.93e-08	6.5017	8.54548	2.23858	2.23858	H2BFXP	H2B histone family member X, pseudogene
218782_s_at	7.34e-09	4.76e-10	7.61871	12.6183	2.2377	2.2377	ATAD2	ATPase family, AAA domain containing 2
219148_at	2.53e-09	1.42e-10	7.9474	13.8139	2.23752	2.23752	PBK	PDZ binding kinase
213564_x_at	8.06e-11	2.79e-12	-9.03087	17.7094	-0.77779	0.77779	LDHB	lactate dehydrogenase B
223549_s_at	4.54e-08	3.67e-09	-7.06483	10.5974	-2.23719	2.23719	ESPN	espin
206486_at	3.1e-06	4.18e-07	5.77615	5.93065	2.23674	2.23674	LAG3	lymphocyte activating 3
217967_s_at	1.89e-14	1.62e-16	11.8801	27.3742	2.23638	2.23638	FAM129A	family with sequence similarity 129 member A
208895_s_at	8.13e-11	2.82e-12	9.02782	17.6986	0.741264	0.741264	DDX18	DEAD-box helicase 18
1556423_at	1.77e-07	1.7e-08	6.64933	9.08234	2.23551	2.23551	VASH1	vasohibin 1
203847_s_at	8.18e-11	2.84e-12	9.02566	17.6909	0.843312	0.843312	AKAP8	A-kinase anchoring protein 8
210119_at	1.35e-07	1.26e-08	-6.73176	9.38253	-2.23508	2.23508	KCNJ15	potassium voltage-gated channel subfamily J member 15
215038_s_at	8.2e-11	2.85e-12	-9.02499	17.6885	-0.900751	0.900751	SETD2	SET domain containing 2
214032_at	1.41e-07	1.32e-08	6.7184	9.33386	2.23474	2.23474	ZAP70	zeta chain of T cell receptor associated protein kinase 70
1563792_at	1.39e-09	7.22e-11	-8.1323	14.4843	-2.23463	2.23463	AMN	amnion associated transmembrane protein
219279_at	7.81e-17	1.53e-19	14.1225	34.2458	2.23416	2.23416	DOCK10	dedicator of cytokinesis 10
242587_at	3.1e-07	3.19e-08	6.47886	8.4625	2.23396	2.23396	SLC9A9	solute carrier family 9 member A9
1565602_at	3.79e-06	5.24e-07	-5.7143	5.71037	-2.23389	2.23389	PCDH9	protocadherin 9
208594_x_at	1.82e-10	7.13e-12	8.76984	16.7791	2.23388	2.23388	LILRA6	leukocyte immunoglobulin like receptor A6
207542_s_at	5.63e-07	6.2e-08	-6.29857	7.80882	-2.23349	2.23349	AQP1	aquaporin 1 (Colton blood group)
242789_at	6.18e-06	9.04e-07	-5.56333	5.17501	-2.23302	2.23302	PDE1A	phosphodiesterase 1A
209546_s_at	4.7e-08	3.82e-09	7.05393	10.5576	2.23274	2.23274	APOL1	apolipoprotein L1
230865_at	0.000478	0.000118	-4.16059	0.440901	-2.23251	2.23251	LIX1	limb and CNS expressed 1
51774_s_at	8.44e-11	2.95e-12	-9.01531	17.6541	-0.953405	0.953405	UBE2D4	ubiquitin conjugating enzyme E2 D4 (putative)
223121_s_at	0.0032	0.00101	3.48065	-1.61236	2.23239	2.23239	SFRP2	secreted frizzled related protein 2
200942_s_at	8.45e-11	2.95e-12	9.01473	17.6521	0.909484	0.909484	HSBP1	heat shock factor binding protein 1
41577_at	5.65e-11	1.85e-12	-9.14487	18.1138	-2.23061	2.23061	PPP1R16B	protein phosphatase 1 regulatory subunit 16B
218974_at	8.27e-13	1.44e-14	-10.5332	22.9276	-2.22936	2.22936	SOBP	sine oculis binding protein homolog
238668_at	4.63e-14	4.89e-16	11.5417	26.2791	2.22783	2.22783	NCKAP1L	NCK associated protein 1 like
201345_s_at	8.52e-11	2.99e-12	9.0118	17.6417	0.925738	0.925738	UBE2D2	ubiquitin conjugating enzyme E2 D2
218476_at	8.52e-11	2.99e-12	-9.01165	17.6411	-0.962637	0.962637	POMT1	protein O-mannosyltransferase 1
224656_s_at	8.56e-11	3e-12	9.0103	17.6363	0.749623	0.749623	LUZP6///MTPN	leucine zipper protein 6///myotrophin
226573_at	2.82e-09	1.61e-10	-7.91411	13.693	-2.2275	2.2275	DIRAS1	DIRAS family GTPase 1
234976_x_at	3.28e-06	4.46e-07	5.75852	5.86778	2.22676	2.22676	MTHFD2	methylenetetrahydrofolate dehydrogenase (NADP+ dependent) 2, methenyltetrahydrofolate cyclohydrolase
232318_s_at	8.81e-05	1.76e-05	-4.72313	2.27564	-2.22656	2.22656	LINC00284	long intergenic non-protein coding RNA 284
208010_s_at	1.55e-05	2.55e-06	5.27455	4.16157	2.22612	2.22612	PTPN22	protein tyrosine phosphatase, non-receptor type 22
208800_at	8.68e-11	3.05e-12	9.00546	17.6191	0.989176	0.989176	SRP72	signal recognition particle 72
219867_at	5.8e-06	8.43e-07	-5.58287	5.24411	-2.22608	2.22608	CHODL	chondrolectin
200833_s_at	8.81e-11	3.1e-12	9.00112	17.6037	0.924728	0.924728	RAP1B	RAP1B, member of RAS oncogene family
227886_at	1.78e-08	1.28e-09	-7.3502	11.6391	-2.22546	2.22546	IFITM10	interferon induced transmembrane protein 10
209504_s_at	1.4e-09	7.28e-11	-8.13031	14.4771	-2.22465	2.22465	PLEKHB1	pleckstrin homology domain containing B1
211941_s_at	9.01e-11	3.18e-12	-8.99434	17.5796	-0.98784	0.98784	PEBP1	phosphatidylethanolamine binding protein 1
219915_s_at	1.17e-11	3.09e-13	-9.64988	19.8895	-2.22446	2.22446	SLC16A10	solute carrier family 16 member 10
211470_s_at	9.85e-07	1.16e-07	-6.12818	7.19321	-2.22426	2.22426	SULT1C2	sulfotransferase family 1C member 2
239237_at	1e-07	8.92e-09	6.82446	9.72041	2.22426	2.22426	TRG-AS1	T cell receptor gamma locus antisense RNA 1
235735_at	6.32e-11	2.1e-12	9.11045	17.9918	2.22389	2.22389	TNFSF8	tumor necrosis factor superfamily member 8
204618_s_at	9.07e-11	3.21e-12	8.99193	17.571	0.747061	0.747061	GABPB1	GA binding protein transcription factor beta subunit 1
1552806_a_at	9.14e-10	4.49e-11	8.26242	14.955	2.2234	2.2234	SIGLEC10	sialic acid binding Ig like lectin 10
223596_at	4.18e-13	6.64e-15	-10.7609	23.6957	-2.22283	2.22283	SLC12A6	solute carrier family 12 member 6
242093_at	1.13e-06	1.35e-07	-6.08671	7.04381	-2.22226	2.22226	SYTL5	synaptotagmin like 5
239656_at	9.3e-08	8.22e-09	-6.84636	9.80025	-2.22185	2.22185	LHFPL3-AS2	LHFPL3 antisense RNA 2
243521_at	9.33e-11	3.31e-12	8.9832	17.54	0.941317	0.941317	ZXDA	zinc finger, X-linked, duplicated A
236420_s_at	4.37e-07	4.68e-08	6.37466	8.08445	2.22181	2.22181	ANO4	anoctamin 4
200850_s_at	9.36e-11	3.32e-12	-8.98223	17.5365	-0.744236	0.744236	AHCYL1	adenosylhomocysteinase like 1
232282_at	5.08e-11	1.64e-12	-9.17864	18.2333	-2.22167	2.22167	WNK3	WNK lysine deficient protein kinase 3
224339_s_at	3.92e-06	5.43e-07	-5.70416	5.67429	-2.22077	2.22077	ANGPTL1	angiopoietin like 1
226548_at	1.05e-07	9.38e-09	-6.81068	9.67017	-2.22065	2.22065	SBK1	SH3 domain binding kinase 1
214438_at	3.15e-09	1.83e-10	7.87918	13.5661	2.2204	2.2204	HLX	H2.0 like homeobox
203741_s_at	2.44e-15	1.28e-17	12.6725	29.8787	2.22013	2.22013	ADCY7	adenylate cyclase 7
208018_s_at	4.79e-14	5.1e-16	11.5288	26.2372	2.22005	2.22005	HCK	HCK proto-oncogene, Src family tyrosine kinase
201562_s_at	7.15e-15	4.85e-17	-12.2532	28.564	-2.21924	2.21924	SORD	sorbitol dehydrogenase
229749_at	3.97e-05	7.22e-06	4.97977	3.14427	2.21863	2.21863	ANO4	anoctamin 4
219551_at	1.86e-14	1.58e-16	-11.8867	27.3955	-2.21813	2.21813	EAF2	ELL associated factor 2
209242_at	1.17e-11	3.09e-13	-9.6504	19.8913	-2.21731	2.21731	PEG3	paternally expressed 3
204489_s_at	5.71e-10	2.62e-11	8.41078	15.4902	2.21693	2.21693	CD44	CD44 molecule (Indian blood group)
204490_s_at	2.54e-08	1.91e-09	7.24203	11.2442	2.21678	2.21678	CD44	CD44 molecule (Indian blood group)
242714_at	1.07e-11	2.79e-13	9.67946	19.9927	2.2156	2.2156	LOC101928429	uncharacterized LOC101928429
203755_at	3.36e-08	2.61e-09	7.15664	10.9325	2.21488	2.21488	BUB1B	BUB1 mitotic checkpoint serine/threonine kinase B
218796_at	1.57e-10	6.02e-12	-8.81649	16.9458	-2.21486	2.21486	FERMT1	fermitin family member 1
203273_s_at	1.02e-10	3.64e-12	-8.9568	17.446	-0.692153	0.692153	TUSC2	tumor suppressor candidate 2
210389_x_at	1.02e-10	3.64e-12	8.95672	17.4458	0.887118	0.887118	TUBD1	tubulin delta 1
218514_at	1.02e-10	3.65e-12	8.95572	17.4422	0.72594	0.72594	SMG8	SMG8, nonsense mediated mRNA decay factor
214459_x_at	1.02e-10	3.66e-12	8.95519	17.4403	0.950049	0.950049	HLA-C	major histocompatibility complex, class I, C
204963_at	1.12e-13	1.42e-15	11.2204	25.2255	2.2148	2.2148	SSPN	sarcospan
226170_at	1.02e-10	3.68e-12	-8.9538	17.4354	-0.750011	0.750011	EYA3	EYA transcriptional coactivator and phosphatase 3
1552548_at	1.05e-08	7.08e-10	-7.51059	12.2241	-2.21475	2.21475	BSND	barttin CLCNK type accessory beta subunit
206809_s_at	1.03e-10	3.7e-12	8.95206	17.4292	0.905384	0.905384	HNRNPA3///HNRNPA3P1	heterogeneous nuclear ribonucleoprotein A3///heterogeneous nuclear ribonucleoprotein A3 pseudogene 1
1557545_s_at	4.31e-08	3.46e-09	7.08085	10.6559	2.21464	2.21464	RNF165	ring finger protein 165
218942_at	1.03e-10	3.7e-12	-8.95192	17.4287	-0.810398	0.810398	PIP4K2C	phosphatidylinositol-5-phosphate 4-kinase type 2 gamma
217845_x_at	1.03e-10	3.7e-12	-8.95183	17.4283	-0.954818	0.954818	HIGD1A	HIG1 hypoxia inducible domain family member 1A
224482_s_at	2.15e-08	1.59e-09	-7.29208	11.4269	-2.21343	2.21343	RAB11FIP4	RAB11 family interacting protein 4
220786_s_at	0.000333	7.84e-05	-4.28343	0.832352	-2.21342	2.21342	SLC38A4	solute carrier family 38 member 4
209087_x_at	9.8e-14	1.21e-15	11.269	25.3858	2.21319	2.21319	MCAM	melanoma cell adhesion molecule
210101_x_at	1.04e-10	3.75e-12	8.94829	17.4158	0.961952	0.961952	SH3GLB1	SH3 domain containing GRB2 like endophilin B1
219790_s_at	6.97e-05	1.36e-05	-4.79876	2.52978	-2.21312	2.21312	NPR3	natriuretic peptide receptor 3
230776_at	6.71e-06	9.93e-07	-5.53739	5.08338	-2.21231	2.21231	RNF157-AS1	RNF157 antisense RNA 1
203523_at	1.17e-10	4.28e-12	8.91178	17.2857	2.21121	2.21121	LSP1	lymphocyte-specific protein 1
203131_at	1.77e-05	2.93e-06	-5.23491	4.02368	-2.21032	2.21032	PDGFRA	platelet derived growth factor receptor alpha
239533_at	9.02e-11	3.18e-12	-8.99412	17.5788	-2.21013	2.21013	GPR155	G protein-coupled receptor 155
208867_s_at	1.06e-10	3.82e-12	8.94337	17.3982	0.977865	0.977865	CSNK1A1	casein kinase 1 alpha 1
204654_s_at	3.68e-10	1.6e-11	-8.54588	15.9764	-2.20986	2.20986	TFAP2A	transcription factor AP-2 alpha
237870_at	8.37e-11	2.92e-12	-9.01808	17.664	-2.20957	2.20957	NQO2	NAD(P)H quinone dehydrogenase 2
214891_at	8.66e-10	4.22e-11	-8.27921	15.0156	-2.2086	2.2086	FBXO21	F-box protein 21
220133_at	8.86e-08	7.77e-09	-6.86161	9.85587	-2.20858	2.20858	ODAM	odontogenic, ameloblast asssociated
231015_at	4.04e-09	2.42e-10	-7.80203	13.2856	-2.20659	2.20659	KLF15	Kruppel like factor 15
229957_at	4.11e-07	4.37e-08	6.39334	8.15216	2.206	2.206	TMEM91	transmembrane protein 91
208480_s_at	1.37e-05	2.21e-06	-5.3147	4.30156	-2.20561	2.20561	LOC101930322///ABCC6	multidrug resistance-associated protein 6-like///ATP binding cassette subfamily C member 6
235050_at	1.19e-07	1.09e-08	-6.77107	9.52579	-2.2056	2.2056	SLC2A12	solute carrier family 2 member 12
217165_x_at	2.61e-08	1.97e-09	-7.23342	11.2128	-2.20506	2.20506	MT1F	metallothionein 1F
1558217_at	3.93e-10	1.72e-11	8.52583	15.9043	2.20454	2.20454	SLFN13	schlafen family member 13
242662_at	5.28e-05	9.95e-06	4.88837	2.83293	2.2044	2.2044	PCSK6	proprotein convertase subtilisin/kexin type 6
201603_at	1.1e-10	4.02e-12	8.92889	17.3467	0.945659	0.945659	PPP1R12A	protein phosphatase 1 regulatory subunit 12A
211896_s_at	3.35e-05	5.96e-06	-5.0345	3.33166	-2.20435	2.20435	DCN	decorin
219873_at	3.07e-12	6.65e-14	-10.0897	21.4137	-2.20426	2.20426	COLEC11	collectin subfamily member 11
201032_at	1.12e-10	4.07e-12	-8.92528	17.3338	-0.934746	0.934746	BLCAP	bladder cancer associated protein
226244_at	2.45e-07	2.44e-08	6.55116	8.72521	2.20337	2.20337	CLEC14A	C-type lectin domain family 14 member A
200606_at	3.31e-05	5.88e-06	-5.0382	3.34437	-2.20307	2.20307	DSP	desmoplakin
210513_s_at	4.63e-08	3.75e-09	7.05894	10.5759	2.20299	2.20299	VEGFA	vascular endothelial growth factor A
35148_at	4.19e-14	4.33e-16	-11.5786	26.3993	-2.20055	2.20055	TJP3	tight junction protein 3
222740_at	3.98e-08	3.16e-09	7.10562	10.7463	2.20023	2.20023	ATAD2	ATPase family, AAA domain containing 2
231772_x_at	3.57e-14	3.6e-16	11.6348	26.5819	2.1986	2.1986	CENPH	centromere protein H
1563906_at	2.08e-08	1.53e-09	-7.30262	11.4654	-2.19818	2.19818	SOBP	sine oculis binding protein homolog
212262_at	1.16e-10	4.23e-12	8.91463	17.2959	0.863041	0.863041	QKI	QKI, KH domain containing RNA binding
224357_s_at	4.23e-11	1.34e-12	9.23639	18.4375	2.19811	2.19811	MS4A4A	membrane spanning 4-domains A4A
227466_at	1.16e-10	4.27e-12	-8.91202	17.2866	-0.819101	0.819101	FAM200B	family with sequence similarity 200 member B
226991_at	1.84e-09	9.94e-11	8.04487	14.1676	2.19707	2.19707	NFATC2	nuclear factor of activated T-cells 2
203889_at	0.000125	2.6e-05	4.61025	1.89933	2.19628	2.19628	SCG5	secretogranin V
203113_s_at	1.17e-10	4.3e-12	8.9101	17.2798	0.755158	0.755158	EEF1D	eukaryotic translation elongation factor 1 delta
236843_at	5.96e-11	1.97e-12	-9.12831	18.0551	-2.19575	2.19575	NOX4	NADPH oxidase 4
59625_at	3.53e-13	5.41e-15	10.8215	23.8991	2.19529	2.19529	NOL3	nucleolar protein 3
210466_s_at	1.18e-10	4.33e-12	8.90816	17.2728	0.818797	0.818797	SERBP1	SERPINE1 mRNA binding protein 1
233022_at	2.19e-10	8.8e-12	-8.71133	16.5698	-2.19514	2.19514	TRPM3	transient receptor potential cation channel subfamily M member 3
209071_s_at	9.24e-08	8.16e-09	6.84844	9.80783	2.1942	2.1942	RGS5	regulator of G-protein signaling 5
204899_s_at	2.03e-11	5.84e-13	9.46963	19.2587	2.19416	2.19416	SAP30	Sin3A associated protein 30
1559265_at	1.3e-06	1.57e-07	-6.0444	6.8915	-2.1937	2.1937	SKIDA1	SKI/DACH domain containing 1
230951_at	6.36e-08	5.39e-09	-6.96073	10.2174	-2.19346	2.19346	EPB41L5	erythrocyte membrane protein band 4.1 like 5
221716_s_at	8.4e-10	4.08e-11	-8.28883	15.0503	-2.19329	2.19329	ACSBG2	acyl-CoA synthetase bubblegum family member 2
212949_at	3.11e-06	4.21e-07	5.77468	5.92537	2.19216	2.19216	NCAPH	non-SMC condensin I complex subunit H
1556927_at	6.14e-06	8.97e-07	-5.56548	5.18261	-2.19198	2.19198	KCNK10	potassium two pore domain channel subfamily K member 10
203968_s_at	1.79e-09	9.64e-11	8.0535	14.1988	2.19063	2.19063	CDC6	cell division cycle 6
211946_s_at	1.2e-10	4.42e-12	8.90254	17.2528	0.830744	0.830744	PRRC2C	proline rich coiled-coil 2C
222938_x_at	7.31e-06	1.09e-06	5.51091	4.98998	2.18991	2.18991	ENPP3	ectonucleotide pyrophosphatase/phosphodiesterase 3
209358_at	1.2e-10	4.44e-12	8.90115	17.2478	0.88003	0.88003	TAF11	TATA-box binding protein associated factor 11
204502_at	1.69e-14	1.41e-16	11.9222	27.5095	2.18987	2.18987	SAMHD1	SAM and HD domain containing deoxynucleoside triphosphate triphosphohydrolase 1
244598_at	3.37e-11	1.04e-12	9.30681	18.686	2.18978	2.18978	LCP2	lymphocyte cytosolic protein 2
208121_s_at	4.49e-09	2.73e-10	-7.76921	13.1662	-2.18825	2.18825	PTPRO	protein tyrosine phosphatase, receptor type O
209278_s_at	0.000613	0.000156	4.07502	0.171589	2.18782	2.18782	TFPI2	tissue factor pathway inhibitor 2
210140_at	1.08e-09	5.39e-11	8.21245	14.7744	2.18588	2.18588	CST7	cystatin F
202270_at	2.93e-11	8.87e-13	9.35192	18.845	2.1855	2.1855	GBP1	guanylate binding protein 1
238245_at	1.95e-07	1.89e-08	-6.62097	8.97915	-2.18534	2.18534	ENPP7	ectonucleotide pyrophosphatase/phosphodiesterase 7
204205_at	7.93e-15	5.54e-17	12.2118	28.4329	2.18271	2.18271	APOBEC3G	apolipoprotein B mRNA editing enzyme catalytic subunit 3G
205712_at	6.67e-08	5.68e-09	-6.94662	10.166	-2.18242	2.18242	PTPRD	protein tyrosine phosphatase, receptor type D
224451_x_at	1.2e-13	1.54e-15	11.196	25.1449	2.18217	2.18217	ARHGAP9	Rho GTPase activating protein 9
214433_s_at	9.23e-12	2.33e-13	-9.73012	20.1692	-2.18215	2.18215	SELENBP1	selenium binding protein 1
202686_s_at	2.15e-16	5.67e-19	13.6845	32.9561	2.18209	2.18209	AXL	AXL receptor tyrosine kinase
211458_s_at	1.33e-15	6.18e-18	-12.9055	30.5995	-2.18087	2.18087	GABARAPL3///GABARAPL1	GABA type A receptor associated protein like 3 pseudogene///GABA type A receptor associated protein like 1
1554722_at	1.1e-07	1e-08	-6.7934	9.60716	-2.17941	2.17941	TRPM3	transient receptor potential cation channel subfamily M member 3
214896_at	1.25e-11	3.34e-13	-9.62827	19.8141	-2.17936	2.17936	LINC01314	long intergenic non-protein coding RNA 1314
1555680_a_at	3.87e-07	4.09e-08	6.4114	8.21766	2.17813	2.17813	SMOX	spermine oxidase
213125_at	3.37e-11	1.04e-12	9.30745	18.6883	2.1771	2.1771	OLFML2B	olfactomedin like 2B
218213_s_at	1.31e-10	4.89e-12	8.87459	17.1532	0.730892	0.730892	TMEM258	transmembrane protein 258
231916_at	1.79e-08	1.29e-09	-7.34891	11.6343	-2.17703	2.17703	NOS1	nitric oxide synthase 1
207095_at	1.95e-05	3.28e-06	-5.20376	3.91557	-2.17566	2.17566	SLC10A2	solute carrier family 10 member 2
1553055_a_at	7.11e-08	6.1e-09	6.9274	10.0958	2.17511	2.17511	SLFN5	schlafen family member 5
214271_x_at	1.33e-10	5e-12	8.86836	17.1309	0.777342	0.777342	RPL12	ribosomal protein L12
228376_at	3.71e-14	3.76e-16	11.6217	26.5394	2.17508	2.17508	GGTA1P	glycoprotein, alpha-galactosyltransferase 1 pseudogene
213648_at	1.36e-10	5.11e-12	-8.86245	17.1099	-0.869293	0.869293	EXOSC7	exosome component 7
217966_s_at	1.16e-13	1.47e-15	11.2098	25.1905	2.17456	2.17456	FAM129A	family with sequence similarity 129 member A
222967_at	1.54e-06	1.92e-07	-5.99066	6.69837	-2.17452	2.17452	SLC5A7	solute carrier family 5 member 7
206210_s_at	0.000182	3.97e-05	4.4858	1.4889	2.17452	2.17452	CETP	cholesteryl ester transfer protein
206048_at	1.11e-07	1e-08	-6.793	9.60572	-2.1733	2.1733	OVOL2	ovo like zinc finger 2
235740_at	9.2e-08	8.12e-09	6.84986	9.81303	2.17221	2.17221	MCTP1	multiple C2 and transmembrane domain containing 1
204412_s_at	2.24e-07	2.2e-08	-6.57918	8.82711	-2.17196	2.17196	NEFH	neurofilament heavy polypeptide
1553159_at	3.85e-06	5.33e-07	5.70962	5.69373	2.17146	2.17146	DNAH11	dynein axonemal heavy chain 11
229088_at	1.36e-09	7.06e-11	-8.13868	14.5074	-2.1706	2.1706	ENPP1	ectonucleotide pyrophosphatase/phosphodiesterase 1
201814_at	1.41e-10	5.33e-12	-8.85054	17.0673	-0.719582	0.719582	TBC1D5	TBC1 domain family member 5
222746_s_at	2.94e-08	2.25e-09	-7.19704	11.08	-2.16979	2.16979	BSPRY	B-box and SPRY domain containing
231994_at	1.36e-08	9.47e-10	-7.43178	11.9367	-2.16966	2.16966	CHDH	choline dehydrogenase
222707_s_at	1.42e-10	5.37e-12	-8.84854	17.0602	-0.705685	0.705685	ACTR8	ARP8 actin-related protein 8 homolog
218870_at	6.01e-09	3.78e-10	7.6809	12.8448	2.16961	2.16961	LOC101928361///ARHGAP15	uncharacterized LOC101928361///Rho GTPase activating protein 15
208567_s_at	2.93e-07	2.99e-08	-6.49679	8.52764	-2.16947	2.16947	LOC100996843///KCNJ18///KCNJ12	ATP-sensitive inward rectifier potassium channel 12-like///potassium voltage-gated channel subfamily J member 18///potassium voltage-gated channel subfamily J member 12
218934_s_at	9.13e-09	6.07e-10	-7.55225	12.376	-2.16806	2.16806	HSPB7	heat shock protein family B (small) member 7
209598_at	3.5e-07	3.65e-08	6.44275	8.33141	2.16788	2.16788	PNMA2	paraneoplastic Ma antigen 2
230895_at	0.000137	2.9e-05	4.57843	1.79393	2.16718	2.16718	HAPLN1	hyaluronan and proteoglycan link protein 1
202910_s_at	1.69e-14	1.41e-16	11.9221	27.5092	2.16699	2.16699	ADGRE5	adhesion G protein-coupled receptor E5
233842_x_at	1.46e-10	5.54e-12	8.83976	17.0289	0.718708	0.718708	RTFDC1	replication termination factor 2 domain containing 1
209382_at	1.48e-10	5.6e-12	8.83668	17.0179	0.906821	0.906821	POLR3C	RNA polymerase III subunit C
204221_x_at	1.27e-10	4.74e-12	8.88324	17.184	2.16584	2.16584	GLIPR1	GLI pathogenesis related 1
223928_s_at	6.51e-06	9.58e-07	-5.54714	5.11783	-2.16564	2.16564	GUCA1C	guanylate cyclase activator 1C
225057_at	3.88e-16	1.28e-18	13.4167	32.1549	2.16504	2.16504	SLC15A4	solute carrier family 15 member 4
233801_s_at	3.04e-06	4.1e-07	-5.78205	5.95165	-2.16492	2.16492	SEMA6D	semaphorin 6D
219700_at	1.52e-12	2.94e-14	10.3254	22.2214	2.1649	2.1649	PLXDC1	plexin domain containing 1
209949_at	1.01e-09	5.05e-11	8.23038	14.8392	2.16182	2.16182	NCF2	neutrophil cytosolic factor 2
212171_x_at	3.63e-09	2.14e-10	7.83527	13.4065	2.16157	2.16157	VEGFA	vascular endothelial growth factor A
200002_at	1.51e-10	5.74e-12	8.83007	16.9943	0.651992	0.651992	RPL35	ribosomal protein L35
224053_s_at	1.22e-10	4.51e-12	-8.89666	17.2318	-2.16094	2.16094	SLC4A9	solute carrier family 4 member 9
211028_s_at	5.63e-05	1.07e-05	-4.86759	2.76247	-2.16067	2.16067	KHK	ketohexokinase
205617_at	7.91e-13	1.37e-14	-10.5477	22.9767	-2.1606	2.1606	PRRG2	proline rich and Gla domain 2
231397_at	0.00251	0.00077	3.57084	-1.35227	2.16018	2.16018	PLPPR5	phospholipid phosphatase related 5
219014_at	1.39e-07	1.3e-08	6.72223	9.3478	2.15984	2.15984	PLAC8	placenta specific 8
224622_at	1.54e-10	5.86e-12	-8.82431	16.9737	-0.916557	0.916557	TBC1D14	TBC1 domain family member 14
212821_at	4.06e-07	4.31e-08	-6.39713	8.1659	-2.15956	2.15956	PLEKHG3	pleckstrin homology and RhoGEF domain containing G3
228401_at	7.93e-08	6.88e-09	6.89483	9.97703	2.15935	2.15935	ATAD2	ATPase family, AAA domain containing 2
215891_s_at	2.77e-10	1.16e-11	8.63608	16.3001	2.1582	2.1582	GM2A	GM2 ganglioside activator
[truncated: 43,119 more rows]
