# Supplementary material for: Prediction and analysis of novel key genes ITGAX, LAPTM5, SERPINE1 in clear cell renal cell carcinoma through bioinformatics analysis
Source: PeerJ. 2021 Apr 20;9:e11272. doi: 10.7717/peerj.11272 (PMC8063882; doi:10.7717/peerj.11272)
Supplement: Supplemental Information 12 — The raw data of the PPI network, including up-regulated genes and down-regulated genes, and considers that the confidence level ≥ 0.4 is significant for PPI. [file peerj-09-11272-s012.xlsx]

## Sheet: string_PPI(funrich)interactions
#node1	node2	node1_string_internal_id	node2_string_internal_id	node1_external_id	node2_external_id	neighborhood_on_chromosome	gene_fusion	phylogenetic_cooccurrence	homology	coexpression	experimentally_determined_interaction	database_annotated	automated_textmining	combined_score
ATP6V1C2	ATP6V1B1	4436011	4433629	9606.ENSP00000272238	9606.ENSP00000234396	0	0	0	0	0.328	0.951	0.9	0.814	0.999
C1QA	C1QB	4444428	4438900	9606.ENSP00000363773	9606.ENSP00000313967	0	0	0.389	0.86	0.989	0.885	0.9	0.844	0.999
PSMB8	PSMB9	4444469	4444464	9606.ENSP00000364016	9606.ENSP00000363993	0	0	0.362	0.764	0.931	0.962	0.9	0.953	0.999
FGF1	FGFR2	4451524	4448546	9606.ENSP00000480791	9606.ENSP00000410294	0	0	0	0	0.078	0.954	0.9	0.829	0.999
EGFR	EGF	4436186	4435570	9606.ENSP00000275493	9606.ENSP00000265171	0	0	0	0	0.16	0.933	0.9	0.972	0.999
PSAT1	PHGDH	4444751	4443312	9606.ENSP00000365773	9606.ENSP00000358417	0.185	0	0	0	0.95	0.413	0.9	0.916	0.999
LY86	CD180	4445292	4434486	9606.ENSP00000369286	9606.ENSP00000256447	0	0	0	0	0.249	0.973	0.9	0.878	0.999
PGF	FLT1	4450339	4436489	9606.ENSP00000451040	9606.ENSP00000282397	0	0	0	0	0	0.877	0.9	0.958	0.999
VEGFA	FLT1	4451310	4436489	9606.ENSP00000478570	9606.ENSP00000282397	0	0	0	0	0.061	0.556	0.9	0.984	0.999
SERPINE1	PLAT	4433266	4433132	9606.ENSP00000223095	9606.ENSP00000220809	0	0	0	0	0.148	0.881	0.9	0.956	0.999
C1QC	C1QB	4444427	4438900	9606.ENSP00000363770	9606.ENSP00000313967	0	0	0.426	0.927	0.989	0.454	0.9	0.893	0.999
CYFIP2	NCKAP1L	4450126	4437010	9606.ENSP00000444645	9606.ENSP00000293373	0	0	0	0	0.431	0.948	0.9	0.707	0.999
TGFA	EGFR	4437149	4436186	9606.ENSP00000295400	9606.ENSP00000275493	0	0	0	0	0.065	0.873	0.9	0.874	0.998
VEGFA	NRP2	4451310	4442374	9606.ENSP00000478570	9606.ENSP00000353582	0	0	0	0	0	0.972	0.9	0.651	0.998
PLG	SERPINE1	4438461	4433266	9606.ENSP00000308938	9606.ENSP00000223095	0	0	0	0	0.063	0.435	0.9	0.978	0.998
NPHS1	NPHS2	4445133	4442926	9606.ENSP00000368190	9606.ENSP00000356587	0	0	0	0	0.062	0.42	0.9	0.976	0.998
C1QA	C1QC	4444428	4444427	9606.ENSP00000363773	9606.ENSP00000363770	0	0	0.397	0.825	0.954	0.379	0.9	0.763	0.997
ITGAX	ITGB2	4450468	4446737	9606.ENSP00000454623	9606.ENSP00000380948	0	0	0	0	0.41	0.905	0.9	0.579	0.997
MMP9	TIMP1	4443919	4433052	9606.ENSP00000361405	9606.ENSP00000218388	0	0	0	0	0.063	0.457	0.9	0.957	0.997
FYB	LCP2	4449385	4432628	9606.ENSP00000427114	9606.ENSP00000046794	0	0	0	0	0.697	0.472	0.9	0.872	0.997
TREM2	TYROBP	4444111	4435115	9606.ENSP00000362205	9606.ENSP00000262629	0	0	0	0	0.535	0.379	0.9	0.925	0.997
ATP6V0A4	ATP6V1B1	4438387	4433629	9606.ENSP00000308122	9606.ENSP00000234396	0.111	0	0	0	0.27	0.622	0.9	0.925	0.997
TOP2A	TPX2	4448614	4437665	9606.ENSP00000411532	9606.ENSP00000300403	0	0	0	0	0.993	0	0	0.595	0.997
ATP6V0D2	ATP6V1B1	4436630	4433629	9606.ENSP00000285393	9606.ENSP00000234396	0.167	0	0	0	0.585	0.76	0.9	0.77	0.997
ERBB2	EGF	4435897	4435570	9606.ENSP00000269571	9606.ENSP00000265171	0	0	0	0	0.16	0.406	0.9	0.94	0.996
HADH	ACAA1	4451107	4440473	9606.ENSP00000474560	9606.ENSP00000333664	0.093	0.077	0.258	0	0.156	0.35	0.9	0.89	0.995
ATP6V0D2	ATP6V1C2	4436630	4436011	9606.ENSP00000285393	9606.ENSP00000272238	0	0	0	0	0.459	0.721	0.9	0.724	0.995
LY86	LY96	4445292	4436604	9606.ENSP00000369286	9606.ENSP00000284818	0	0	0	0	0.231	0.379	0.9	0.891	0.994
COL5A2	COL1A1	4444466	4433346	9606.ENSP00000364000	9606.ENSP00000225964	0	0	0.444	0.949	0.945	0	0.9	0.76	0.994
CR2	C3	4442797	4433951	9606.ENSP00000356024	9606.ENSP00000245907	0	0	0	0	0.061	0.87	0.9	0.575	0.994
BRCA2	FANCI	4445332	4438638	9606.ENSP00000369497	9606.ENSP00000310842	0	0	0	0	0.241	0.379	0.9	0.886	0.993
VEGFA	EGF	4451310	4435570	9606.ENSP00000478570	9606.ENSP00000265171	0	0	0	0	0	0	0.9	0.937	0.993
FGFR2	FGF9	4448546	4445677	9606.ENSP00000410294	9606.ENSP00000371790	0	0	0	0	0.063	0.751	0.9	0.735	0.993
CAV1	EGFR	4440933	4436186	9606.ENSP00000339191	9606.ENSP00000275493	0	0	0	0	0.335	0.393	0.9	0.844	0.992
PDK1	PDHA1	4446044	4445276	9606.ENSP00000376352	9606.ENSP00000369134	0	0	0	0	0.062	0.845	0.9	0.555	0.992
PTHLH	PTH1R	4450000	4439492	9606.ENSP00000441765	9606.ENSP00000321999	0	0	0	0	0	0.379	0.9	0.885	0.992
NFASC	ANK3	4441455	4436396	9606.ENSP00000344786	9606.ENSP00000280772	0	0	0	0	0.144	0.297	0.9	0.891	0.992
PLG	HRG	4438461	4433552	9606.ENSP00000308938	9606.ENSP00000232003	0	0	0	0	0.428	0.379	0.9	0.817	0.992
NEDD4L	SCNN1G	4446996	4437627	9606.ENSP00000383199	9606.ENSP00000300061	0	0	0	0	0	0.454	0.9	0.849	0.991
NEDD4L	SCNN1A	4446996	4442340	9606.ENSP00000383199	9606.ENSP00000353292	0	0	0	0	0	0.472	0.9	0.844	0.991
ATP6V0A4	ATP6V0D2	4438387	4436630	9606.ENSP00000308122	9606.ENSP00000285393	0.111	0	0	0	0.188	0.698	0.9	0.689	0.991
MMP9	PLG	4443919	4438461	9606.ENSP00000361405	9606.ENSP00000308938	0	0	0	0	0.063	0.379	0.9	0.863	0.991
PLCG2	LCP2	4451677	4432628	9606.ENSP00000482457	9606.ENSP00000046794	0	0	0	0	0.214	0.522	0.9	0.764	0.99
FN1	ALB	4441661	4437206	9606.ENSP00000346839	9606.ENSP00000295897	0	0	0	0	0.077	0.104	0.9	0.899	0.99
ATP6V1G3	ATP6V1C2	4436410	4436011	9606.ENSP00000281087	9606.ENSP00000272238	0	0	0	0	0.147	0.559	0.9	0.785	0.99
FN1	ITGA5	4441661	4437011	9606.ENSP00000346839	9606.ENSP00000293379	0	0	0	0	0.153	0.379	0.9	0.841	0.99
PTPRC	CXCR4	4448605	4447439	9606.ENSP00000411355	9606.ENSP00000386884	0	0	0	0	0.224	0.379	0.9	0.829	0.99
ITGB2	ICAM1	4446737	4435501	9606.ENSP00000380948	9606.ENSP00000264832	0	0	0	0	0.113	0.379	0.9	0.829	0.989
ATP6V1G3	ATP6V1B1	4436410	4433629	9606.ENSP00000281087	9606.ENSP00000234396	0	0	0	0	0.113	0.56	0.9	0.762	0.989
ATP6V0D2	ATP6V1G3	4436630	4436410	9606.ENSP00000285393	9606.ENSP00000281087	0	0	0	0	0.189	0.644	0.9	0.694	0.989
LY96	TLR2	4436604	4434743	9606.ENSP00000284818	9606.ENSP00000260010	0	0	0	0	0.129	0.579	0.9	0.752	0.989
VEGFA	MMP9	4451310	4443919	9606.ENSP00000478570	9606.ENSP00000361405	0	0	0	0	0	0	0.8	0.946	0.989
KCTD1	TFAP2B	4447110	4446171	9606.ENSP00000384367	9606.ENSP00000377265	0	0	0	0	0.064	0.587	0.9	0.766	0.989
NCK1	NPHS1	4448885	4445133	9606.ENSP00000417273	9606.ENSP00000368190	0	0	0	0	0	0.467	0.9	0.804	0.988
NRP2	FLT1	4442374	4436489	9606.ENSP00000353582	9606.ENSP00000282397	0	0	0	0	0	0.521	0.9	0.78	0.988
FN1	EGF	4441661	4435570	9606.ENSP00000346839	9606.ENSP00000265171	0	0	0	0	0	0	0.9	0.888	0.988
VEGFA	FN1	4451310	4441661	9606.ENSP00000478570	9606.ENSP00000346839	0	0	0	0	0.076	0	0.9	0.88	0.988
NCK1	LCP2	4448885	4432628	9606.ENSP00000417273	9606.ENSP00000046794	0	0	0	0	0.049	0.379	0.9	0.818	0.987
KCTD1	TFAP2A	4447110	4445240	9606.ENSP00000384367	9606.ENSP00000368924	0	0	0	0	0.107	0.587	0.9	0.696	0.987
VEGFA	ALB	4451310	4437206	9606.ENSP00000478570	9606.ENSP00000295897	0	0	0	0	0.062	0	0.9	0.871	0.986
ATP6V0A4	ATP6V1C2	4438387	4436011	9606.ENSP00000308122	9606.ENSP00000272238	0	0	0	0	0.148	0.42	0.9	0.763	0.986
HAO2	PIPOX	4451782	4439149	9606.ENSP00000483507	9606.ENSP00000317721	0	0	0	0	0.515	0	0.9	0.721	0.985
VCAN	DCN	4435552	4432629	9606.ENSP00000265077	9606.ENSP00000052754	0	0	0	0	0.063	0.085	0.9	0.852	0.985
PSMB9	TAP1	4444464	4441602	9606.ENSP00000363993	9606.ENSP00000346206	0	0	0	0	0.917	0.348	0	0.752	0.985
TOP2A	MKI67	4448614	4443142	9606.ENSP00000411532	9606.ENSP00000357643	0	0	0	0	0.966	0	0	0.564	0.984
ALDH4A1	PRODH2	4444540	4437726	9606.ENSP00000364490	9606.ENSP00000301175	0.058	0	0	0	0.292	0.157	0.9	0.76	0.984
NUSAP1	TOP2A	4450429	4448614	9606.ENSP00000453403	9606.ENSP00000411532	0	0	0	0	0.966	0	0	0.562	0.984
IGFBP3	FN1	4445494	4441661	9606.ENSP00000370473	9606.ENSP00000346839	0	0	0	0	0.303	0.379	0.9	0.685	0.984
FN1	PLG	4441661	4438461	9606.ENSP00000346839	9606.ENSP00000308938	0	0	0	0	0	0.294	0.9	0.8	0.984
CCL5	CXCR4	4451102	4447439	9606.ENSP00000474412	9606.ENSP00000386884	0	0	0	0	0.061	0.05	0.9	0.832	0.983
PLG	KNG1	4438461	4435537	9606.ENSP00000308938	9606.ENSP00000265023	0	0	0	0	0.262	0.379	0.9	0.677	0.983
C3AR1	C3	4437821	4433951	9606.ENSP00000302079	9606.ENSP00000245907	0	0	0	0	0.062	0.441	0.9	0.73	0.983
ITGB2	ITGA4	4446737	4446627	9606.ENSP00000380948	9606.ENSP00000380227	0	0	0	0	0.154	0.382	0.9	0.724	0.983
NEDD4L	SCNN1B	4446996	4441549	9606.ENSP00000383199	9606.ENSP00000345751	0	0	0	0	0	0.472	0.9	0.709	0.983
ITGAX	ICAM1	4450468	4435501	9606.ENSP00000454623	9606.ENSP00000264832	0	0	0	0	0.084	0.17	0.9	0.799	0.982
ANK2	NFASC	4441946	4441455	9606.ENSP00000349588	9606.ENSP00000344786	0	0	0	0	0.232	0.297	0.9	0.713	0.982
VEGFA	SERPINE1	4451310	4433266	9606.ENSP00000478570	9606.ENSP00000223095	0	0	0	0	0.076	0	0.9	0.821	0.982
F11	KNG1	4447185	4435537	9606.ENSP00000384957	9606.ENSP00000265023	0	0	0	0	0.134	0.379	0.9	0.71	0.982
ATP6V0A4	ATP6V1G3	4438387	4436410	9606.ENSP00000308122	9606.ENSP00000281087	0	0	0	0	0.065	0.402	0.9	0.719	0.982
TGFA	ERBB2	4437149	4435897	9606.ENSP00000295400	9606.ENSP00000269571	0	0	0	0	0	0.513	0.9	0.646	0.981
ALB	EGF	4437206	4435570	9606.ENSP00000295897	9606.ENSP00000265171	0	0	0	0	0	0	0.9	0.808	0.98
NUSAP1	MKI67	4450429	4443142	9606.ENSP00000453403	9606.ENSP00000357643	0	0	0	0	0.965	0	0	0.467	0.98
TLR3	BIRC3	4437339	4435265	9606.ENSP00000296795	9606.ENSP00000263464	0	0	0	0	0.049	0.754	0.9	0.282	0.98
ALB	CP	4437206	4435459	9606.ENSP00000295897	9606.ENSP00000264613	0	0	0	0	0.171	0	0.9	0.788	0.98
FN1	SERPINE1	4441661	4433266	9606.ENSP00000346839	9606.ENSP00000223095	0	0	0	0	0.295	0	0.9	0.735	0.979
VEGFA	EGFR	4451310	4436186	9606.ENSP00000478570	9606.ENSP00000275493	0	0	0	0	0.089	0	0.6	0.947	0.979
CCL5	CCL20	4451102	4442174	9606.ENSP00000474412	9606.ENSP00000351671	0	0	0	0	0.133	0.219	0.9	0.738	0.979
FBLN5	LOX	4441481	4433517	9606.ENSP00000345008	9606.ENSP00000231004	0	0	0	0	0.167	0.363	0.9	0.658	0.979
HCK	ITGB2	4450141	4446737	9606.ENSP00000444986	9606.ENSP00000380948	0	0	0	0	0.708	0.184	0.9	0.235	0.979
ALB	SERPINE1	4437206	4433266	9606.ENSP00000295897	9606.ENSP00000223095	0	0	0	0	0.077	0	0.9	0.795	0.979
PLG	ALB	4438461	4437206	9606.ENSP00000308938	9606.ENSP00000295897	0	0	0	0	0.257	0	0.9	0.737	0.978
EVI2B	EVI2A	4440484	4434020	9606.ENSP00000333779	9606.ENSP00000247270	0	0	0	0	0.783	0	0	0.903	0.978
PFKP	ALDOC	4445499	4433361	9606.ENSP00000370517	9606.ENSP00000226253	0	0	0	0	0.215	0	0.9	0.747	0.978
EGF	SERPINE1	4435570	4433266	9606.ENSP00000265171	9606.ENSP00000223095	0	0	0	0	0	0	0.9	0.798	0.978
SCN2A	ANK3	4444560	4436396	9606.ENSP00000364586	9606.ENSP00000280772	0	0	0	0	0.146	0.407	0.9	0.629	0.978
PLXNB1	ERBB2	4442133	4435897	9606.ENSP00000351338	9606.ENSP00000269571	0	0	0	0	0.095	0.294	0.9	0.698	0.978
TYROBP	LCP2	4435115	4432628	9606.ENSP00000262629	9606.ENSP00000046794	0	0	0	0	0.571	0	0.9	0.522	0.977
BDH1	OXCT1	4446014	4432761	9606.ENSP00000376184	9606.ENSP00000196371	0	0	0	0	0.049	0	0.9	0.768	0.976
ITGA4	FN1	4446627	4441661	9606.ENSP00000380227	9606.ENSP00000346839	0	0	0	0	0.051	0.379	0.9	0.642	0.976
ITGB2	CD53	4446737	4435973	9606.ENSP00000380948	9606.ENSP00000271324	0	0	0	0	0.671	0	0.9	0.348	0.976
TNFAIP3	BIRC3	4451592	4435265	9606.ENSP00000481570	9606.ENSP00000263464	0	0	0	0	0.296	0.294	0.9	0.572	0.975
IGFBP3	PLG	4445494	4438461	9606.ENSP00000370473	9606.ENSP00000308938	0	0	0	0	0	0.379	0.9	0.64	0.975
PFKP	ALDOB	4445499	4444463	9606.ENSP00000370517	9606.ENSP00000363988	0	0	0	0	0.188	0	0.9	0.717	0.975
HCK	EGFR	4450141	4436186	9606.ENSP00000444986	9606.ENSP00000275493	0	0	0	0.679	0	0.701	0.9	0.722	0.975
EGF	TIMP1	4435570	4433052	9606.ENSP00000265171	9606.ENSP00000218388	0	0	0	0	0	0	0.9	0.75	0.974
SERPINE1	TIMP1	4433266	4433052	9606.ENSP00000223095	9606.ENSP00000218388	0	0	0	0	0.174	0	0.9	0.712	0.974
CAV1	EGF	4440933	4435570	9606.ENSP00000339191	9606.ENSP00000265171	0	0	0	0	0	0	0.9	0.746	0.973
VEGFA	TIMP1	4451310	4433052	9606.ENSP00000478570	9606.ENSP00000218388	0	0	0	0	0.084	0	0.9	0.731	0.973
VEGFA	KNG1	4451310	4435537	9606.ENSP00000478570	9606.ENSP00000265023	0	0	0	0	0	0	0.9	0.743	0.973
PLCG2	FCER1G	4451677	4436828	9606.ENSP00000482457	9606.ENSP00000289902	0	0	0	0	0.087	0.379	0.9	0.591	0.973
ITGB2	FCER1G	4446737	4436828	9606.ENSP00000380948	9606.ENSP00000289902	0	0	0	0	0.662	0	0.9	0.291	0.973
ADH1C	ADH1B	4449347	4438237	9606.ENSP00000426083	9606.ENSP00000306606	0	0	0.449	0.986	0.179	0.692	0.9	0.921	0.973
CYFIP2	NCK1	4450126	4448885	9606.ENSP00000444645	9606.ENSP00000417273	0	0	0	0	0.056	0.342	0.9	0.608	0.972
LY96	CD180	4436604	4434486	9606.ENSP00000284818	9606.ENSP00000256447	0	0	0	0	0.076	0.351	0.9	0.59	0.972
FN1	TIMP1	4441661	4433052	9606.ENSP00000346839	9606.ENSP00000218388	0	0	0	0	0.11	0	0.9	0.712	0.972
HMGCS2	ACAA1	4443311	4440473	9606.ENSP00000358414	9606.ENSP00000333664	0.093	0	0	0	0.143	0.37	0.9	0.517	0.972
PDHA1	PDP2	4445276	4438515	9606.ENSP00000369134	9606.ENSP00000309548	0	0	0	0	0	0.261	0.9	0.655	0.972
ALB	C3	4437206	4433951	9606.ENSP00000295897	9606.ENSP00000245907	0	0	0	0	0.143	0	0.9	0.704	0.972
KNG1	HRG	4435537	4433552	9606.ENSP00000265023	9606.ENSP00000232003	0	0	0	0	0.257	0	0.9	0.641	0.971
EGFR	ERBB2	4436186	4435897	9606.ENSP00000275493	9606.ENSP00000269571	0	0	0	0.941	0.077	0.699	0.9	0.967	0.971
ALB	KNG1	4437206	4435537	9606.ENSP00000295897	9606.ENSP00000265023	0	0	0	0	0.202	0	0.9	0.67	0.971
HADH	ALDH6A1	4451107	4450308	9606.ENSP00000474560	9606.ENSP00000450436	0	0.006	0	0	0.667	0	0.9	0.206	0.971
EGF	KNG1	4435570	4435537	9606.ENSP00000265171	9606.ENSP00000265023	0	0	0	0	0	0	0.9	0.714	0.97
PSMB8	TAP1	4444469	4441602	9606.ENSP00000364016	9606.ENSP00000346206	0	0.066	0	0	0.845	0.374	0	0.714	0.97
ITGB2	C3AR1	4446737	4437821	9606.ENSP00000380948	9606.ENSP00000302079	0	0	0	0	0.586	0	0.9	0.343	0.97
FN1	VCAN	4441661	4435552	9606.ENSP00000346839	9606.ENSP00000265077	0	0	0	0	0.097	0	0.9	0.694	0.97
CHST15	CHST11	4448230	4438158	9606.ENSP00000402394	9606.ENSP00000305725	0	0	0	0	0	0	0.9	0.712	0.97
MTHFD2	TYMS	4446222	4439011	9606.ENSP00000377617	9606.ENSP00000315644	0.214	0	0	0	0.141	0.057	0.9	0.605	0.97
L1CAM	ANK2	4443451	4441946	9606.ENSP00000359077	9606.ENSP00000349588	0	0	0	0	0.114	0.544	0.9	0.341	0.969
SERPINA5	PROC	4440432	4433614	9606.ENSP00000333203	9606.ENSP00000234071	0	0	0	0	0.177	0.435	0.9	0.416	0.969
MUC1	MUC15	4451890	4448848	9606.ENSP00000484824	9606.ENSP00000416753	0	0	0	0	0	0	0.9	0.711	0.969
VEGFA	PLG	4451310	4438461	9606.ENSP00000478570	9606.ENSP00000308938	0	0	0	0	0	0	0.9	0.708	0.969
COL4A1	COL1A1	4444632	4433346	9606.ENSP00000364979	9606.ENSP00000225964	0	0	0.407	0.706	0.575	0	0.9	0.758	0.969
HCK	FCGR2A	4450141	4435978	9606.ENSP00000444986	9606.ENSP00000271450	0	0	0	0	0.498	0.294	0.9	0.25	0.969
PTPRC	LCP2	4448605	4432628	9606.ENSP00000411355	9606.ENSP00000046794	0	0	0	0	0.915	0.379	0	0.473	0.969
KNG1	SERPINE1	4435537	4433266	9606.ENSP00000265023	9606.ENSP00000223095	0	0	0	0	0.055	0	0.9	0.703	0.969
PLG	TIMP1	4438461	4433052	9606.ENSP00000308938	9606.ENSP00000218388	0	0	0	0	0	0	0.9	0.708	0.969
COL4A1	COL5A2	4444632	4444466	9606.ENSP00000364979	9606.ENSP00000364000	0	0	0.43	0.699	0.581	0	0.9	0.68	0.969
NUSAP1	TPX2	4450429	4437665	9606.ENSP00000453403	9606.ENSP00000300403	0	0	0	0	0.913	0	0	0.647	0.968
EGFR	DCN	4436186	4432629	9606.ENSP00000275493	9606.ENSP00000052754	0	0	0	0	0.088	0.403	0.8	0.746	0.968
SCNN1G	WNK4	4437627	4434005	9606.ENSP00000300061	9606.ENSP00000246914	0	0	0	0	0	0	0.9	0.683	0.967
EPHX2	CYP2J2	4449539	4443694	9606.ENSP00000430269	9606.ENSP00000360247	0.056	0	0	0	0.078	0.081	0.9	0.657	0.967
FBP1	ALDOB	4448472	4444463	9606.ENSP00000408025	9606.ENSP00000363988	0	0	0	0	0.181	0	0.9	0.634	0.967
NCK1	FLT1	4448885	4436489	9606.ENSP00000417273	9606.ENSP00000282397	0	0	0	0	0	0.65	0.9	0.134	0.967
VSIG4	C1QB	4444445	4438900	9606.ENSP00000363869	9606.ENSP00000313967	0	0	0	0	0.955	0	0	0.298	0.967
COL1A1	DCN	4433346	4432629	9606.ENSP00000225964	9606.ENSP00000052754	0	0	0	0	0.868	0.405	0	0.61	0.966
VSIG4	C1QA	4444445	4444428	9606.ENSP00000363869	9606.ENSP00000363773	0	0	0	0	0.955	0	0	0.286	0.966
ACADSB	ACAA1	4443211	4440473	9606.ENSP00000357873	9606.ENSP00000333664	0.055	0	0	0	0.17	0	0.9	0.623	0.966
FN1	C3	4441661	4433951	9606.ENSP00000346839	9606.ENSP00000245907	0	0	0	0	0.095	0.264	0.9	0.558	0.966
L1CAM	EGFR	4443451	4436186	9606.ENSP00000359077	9606.ENSP00000275493	0	0	0	0	0.087	0.472	0.9	0.364	0.965
ENTPD1	ENPP1	4443695	4442442	9606.ENSP00000360250	9606.ENSP00000354238	0	0	0	0	0.064	0.05	0.9	0.661	0.965
HMGCS2	OXCT1	4443311	4432761	9606.ENSP00000358414	9606.ENSP00000196371	0.071	0	0	0	0.061	0	0.9	0.656	0.965
VCAN	TLR2	4435552	4434743	9606.ENSP00000265077	9606.ENSP00000260010	0	0	0	0	0	0.085	0.9	0.651	0.965
SCN2A	NFASC	4444560	4441455	9606.ENSP00000364586	9606.ENSP00000344786	0	0	0	0	0.207	0	0.9	0.598	0.965
ITGB2	CYBB	4446737	4445083	9606.ENSP00000380948	9606.ENSP00000367851	0	0	0	0	0.577	0	0.9	0.25	0.965
SCN2A	ANK2	4444560	4441946	9606.ENSP00000364586	9606.ENSP00000349588	0	0	0	0	0.231	0.085	0.9	0.548	0.964
CSF1R	TYROBP	4436666	4435115	9606.ENSP00000286301	9606.ENSP00000262629	0	0	0	0	0.925	0	0	0.539	0.964
PLCG2	EGFR	4451677	4436186	9606.ENSP00000482457	9606.ENSP00000275493	0	0	0	0	0.06	0.749	0.8	0.334	0.964
PLG	EGF	4438461	4435570	9606.ENSP00000308938	9606.ENSP00000265171	0	0	0	0	0	0	0.9	0.661	0.964
TLR7	CTSS	4445433	4443237	9606.ENSP00000370034	9606.ENSP00000357981	0	0	0	0	0.554	0	0.9	0.25	0.963
CP	C3	4435459	4433951	9606.ENSP00000264613	9606.ENSP00000245907	0	0	0	0	0.2	0	0.9	0.581	0.963
DTL	DDB2	4442781	4434523	9606.ENSP00000355958	9606.ENSP00000256996	0	0	0	0	0.061	0	0.9	0.644	0.963
COL5A2	PLOD2	4444466	4436514	9606.ENSP00000364000	9606.ENSP00000282903	0	0	0	0	0.179	0.17	0.9	0.519	0.962
PCK1	PPARGC1A	4439313	4435507	9606.ENSP00000319814	9606.ENSP00000264867	0	0	0	0	0.078	0	0.9	0.621	0.962
PLOD2	COL1A1	4436514	4433346	9606.ENSP00000282903	9606.ENSP00000225964	0	0	0	0	0.145	0.17	0.9	0.53	0.962
CNTN1	L1CAM	4450218	4443451	9606.ENSP00000447006	9606.ENSP00000359077	0	0	0	0.7	0.114	0.591	0.9	0.089	0.961
SCNN1A	WNK4	4442340	4434005	9606.ENSP00000353292	9606.ENSP00000246914	0	0	0	0	0.061	0	0.9	0.621	0.961
LAIR1	CD300A	4445944	4442338	9606.ENSP00000375622	9606.ENSP00000353259	0	0	0	0	0.226	0	0.9	0.545	0.961
FCER1G	TYROBP	4436828	4435115	9606.ENSP00000289902	9606.ENSP00000262629	0	0	0	0	0.888	0	0	0.659	0.96
CHST11	VCAN	4438158	4435552	9606.ENSP00000305725	9606.ENSP00000265077	0	0	0	0	0.061	0	0.9	0.61	0.96
FCER1G	LCP2	4436828	4432628	9606.ENSP00000289902	9606.ENSP00000046794	0	0	0	0	0.414	0	0.9	0.364	0.959
ALDH6A1	ABAT	4450308	4446571	9606.ENSP00000450436	9606.ENSP00000379845	0	0	0	0	0.187	0	0.9	0.543	0.959
FBP1	ALDOC	4448472	4433361	9606.ENSP00000408025	9606.ENSP00000226253	0	0	0	0	0.129	0	0.9	0.565	0.958
VSIG4	C3	4444445	4433951	9606.ENSP00000363869	9606.ENSP00000245907	0	0	0	0	0.107	0.87	0	0.67	0.958
PLXNB1	MET	4442133	4439114	9606.ENSP00000351338	9606.ENSP00000317272	0	0	0	0.547	0.049	0.407	0.9	0.719	0.958
SCNN1B	SCNN1G	4441549	4437627	9606.ENSP00000345751	9606.ENSP00000300061	0	0	0	0.868	0.221	0.432	0.9	0.943	0.957
ITGAX	CD86	4450468	4440320	9606.ENSP00000454623	9606.ENSP00000332049	0	0	0	0	0.286	0	0	0.942	0.957
HADH	OXCT1	4451107	4432761	9606.ENSP00000474560	9606.ENSP00000196371	0.167	0	0	0	0.09	0	0.9	0.496	0.956
CSPG4	VCAN	4438793	4435552	9606.ENSP00000312506	9606.ENSP00000265077	0	0	0	0	0.062	0	0.9	0.578	0.956
ITGAX	C3	4450468	4433951	9606.ENSP00000454623	9606.ENSP00000245907	0	0	0	0	0.063	0.379	0.9	0.348	0.956
CXCR4	CCL20	4447439	4442174	9606.ENSP00000386884	9606.ENSP00000351671	0	0	0	0	0	0	0.9	0.586	0.956
ALB	TIMP1	4437206	4433052	9606.ENSP00000295897	9606.ENSP00000218388	0	0	0	0	0	0	0.9	0.587	0.956
VEGFA	ERBB2	4451310	4435897	9606.ENSP00000478570	9606.ENSP00000269571	0	0	0	0	0	0	0.6	0.895	0.956
MMP9	TNFAIP6	4443919	4433852	9606.ENSP00000361405	9606.ENSP00000243347	0	0	0	0	0.155	0	0.9	0.527	0.956
PLCG2	ERBB2	4451677	4435897	9606.ENSP00000482457	9606.ENSP00000269571	0	0	0	0	0.06	0.732	0.8	0.23	0.956
ENPP3	ENTPD1	4448408	4443695	9606.ENSP00000406261	9606.ENSP00000360250	0	0	0	0	0.064	0.05	0.9	0.572	0.956
GABRA2	GPHN	4449188	4448937	9606.ENSP00000421828	9606.ENSP00000417901	0	0	0	0	0	0.348	0.9	0.386	0.956
SH3GL2	EGFR	4445424	4436186	9606.ENSP00000369981	9606.ENSP00000275493	0	0	0	0	0.052	0.393	0.9	0.318	0.955
PIPOX	ACOX2	4439149	4438346	9606.ENSP00000317721	9606.ENSP00000307697	0	0	0	0	0.063	0	0.9	0.56	0.955
SCNN1B	WNK4	4441549	4434005	9606.ENSP00000345751	9606.ENSP00000246914	0	0	0	0	0.061	0	0.9	0.562	0.955
CYBB	CD53	4445083	4435973	9606.ENSP00000367851	9606.ENSP00000271324	0	0	0	0	0.488	0	0.9	0.199	0.955
NNMT	EGFR	4449990	4436186	9606.ENSP00000441434	9606.ENSP00000275493	0	0	0	0	0.945	0.11	0	0.145	0.954
HCK	SLA	4450141	4447831	9606.ENSP00000444986	9606.ENSP00000394049	0	0	0	0.769	0.543	0.063	0.9	0.111	0.954
KNG1	C3	4435537	4433951	9606.ENSP00000265023	9606.ENSP00000245907	0	0	0	0	0.094	0	0.9	0.54	0.954
PLCG2	HCK	4451677	4450141	9606.ENSP00000482457	9606.ENSP00000444986	0	0	0	0.553	0.204	0.4	0.9	0.297	0.954
F11	SERPINA5	4447185	4440432	9606.ENSP00000384957	9606.ENSP00000333203	0	0	0	0	0.214	0.376	0.9	0.189	0.954
VEGFA	PGF	4451310	4450339	9606.ENSP00000478570	9606.ENSP00000451040	0	0	0	0.897	0	0.514	0.9	0.942	0.954
SCNN1A	SCNN1B	4442340	4441549	9606.ENSP00000353292	9606.ENSP00000345751	0	0	0	0.821	0.107	0.432	0.9	0.941	0.954
PIPOX	DAO	4439149	4433414	9606.ENSP00000317721	9606.ENSP00000228476	0	0	0	0	0.063	0	0.9	0.541	0.953
ANGPTL4	PPARGC1A	4437761	4435507	9606.ENSP00000301455	9606.ENSP00000264867	0	0	0	0	0	0	0.9	0.557	0.953
VEGFA	KIT	4451310	4436763	9606.ENSP00000478570	9606.ENSP00000288135	0	0	0	0	0	0.174	0.6	0.87	0.953
VEGFA	ANGPT2	4451310	4438957	9606.ENSP00000478570	9606.ENSP00000314897	0	0	0	0	0	0.294	0	0.935	0.952
PSMB8	GBP2	4444469	4443541	9606.ENSP00000364016	9606.ENSP00000359497	0	0	0	0	0.266	0	0.9	0.402	0.952
HAO2	ACOX2	4451782	4438346	9606.ENSP00000483507	9606.ENSP00000307697	0.044	0	0	0	0.086	0	0.9	0.521	0.952
HAO2	DAO	4451782	4433414	9606.ENSP00000483507	9606.ENSP00000228476	0	0	0	0	0.201	0	0.9	0.458	0.952
CTSS	LYZ	4443237	4434847	9606.ENSP00000357981	9606.ENSP00000261267	0	0	0	0	0.484	0	0.9	0.156	0.952
NCK1	NPHS2	4448885	4442926	9606.ENSP00000417273	9606.ENSP00000356587	0	0	0	0	0	0	0.9	0.538	0.951
PLG	PLAT	4438461	4433132	9606.ENSP00000308938	9606.ENSP00000220809	0	0	0	0.756	0.056	0.379	0.9	0.953	0.951
L1CAM	ANK3	4443451	4436396	9606.ENSP00000359077	9606.ENSP00000280772	0	0	0	0	0.063	0.297	0.9	0.347	0.951
CD300A	CD53	4442338	4435973	9606.ENSP00000353259	9606.ENSP00000271324	0	0	0	0	0.53	0	0.9	0	0.95
GPC3	HS6ST1	4446259	4434688	9606.ENSP00000377836	9606.ENSP00000259241	0	0	0	0	0	0	0.9	0.523	0.95
HRG	SERPINE1	4433552	4433266	9606.ENSP00000232003	9606.ENSP00000223095	0	0	0	0	0.063	0	0.9	0.515	0.95
CSPG4	DCN	4438793	4432629	9606.ENSP00000312506	9606.ENSP00000052754	0	0	0	0	0.137	0	0.9	0.475	0.95
PLG	C3	4438461	4433951	9606.ENSP00000308938	9606.ENSP00000245907	0	0	0	0	0.148	0.05	0.8	0.732	0.95
FN1	KNG1	4441661	4435537	9606.ENSP00000346839	9606.ENSP00000265023	0	0	0	0	0.052	0	0.9	0.519	0.95
F11	PROC	4447185	4433614	9606.ENSP00000384957	9606.ENSP00000234071	0	0	0.351	0.695	0.455	0	0.9	0.148	0.95
ITGB2	CD300A	4446737	4442338	9606.ENSP00000380948	9606.ENSP00000353259	0	0	0	0	0.505	0	0.9	0.06	0.949
TFAP2B	TFAP2A	4446171	4445240	9606.ENSP00000377265	9606.ENSP00000368924	0	0	0	0.971	0.235	0.379	0.9	0.75	0.949
ITGAX	FCER1G	4450468	4436828	9606.ENSP00000454623	9606.ENSP00000289902	0	0	0	0	0.437	0	0.9	0.177	0.949
SCNN1A	SCNN1G	4442340	4437627	9606.ENSP00000353292	9606.ENSP00000300061	0	0	0	0.844	0.064	0.432	0.9	0.833	0.949
IGFBP3	TIMP1	4445494	4433052	9606.ENSP00000370473	9606.ENSP00000218388	0	0	0	0	0.117	0	0.9	0.477	0.949
CD300A	FCER1G	4442338	4436828	9606.ENSP00000353259	9606.ENSP00000289902	0	0	0	0	0.335	0.129	0.9	0.237	0.949
COL4A1	PLOD2	4444632	4436514	9606.ENSP00000364979	9606.ENSP00000282903	0	0	0	0	0.169	0.185	0.9	0.329	0.948
GPC3	ALB	4446259	4437206	9606.ENSP00000377836	9606.ENSP00000295897	0	0	0	0	0.214	0	0.9	0.399	0.948
SPTBN2	ANK2	4449634	4441946	9606.ENSP00000432568	9606.ENSP00000349588	0	0	0	0	0.105	0.186	0.9	0.377	0.948
IGFBP3	ALB	4445494	4437206	9606.ENSP00000370473	9606.ENSP00000295897	0	0	0	0	0.098	0	0.9	0.473	0.948
ALB	PROC	4437206	4433614	9606.ENSP00000295897	9606.ENSP00000234071	0	0	0	0	0.323	0	0.9	0.287	0.947
PLOD2	COLGALT1	4436514	4434239	9606.ENSP00000282903	9606.ENSP00000252599	0	0	0	0.556	0.064	0.369	0.9	0.429	0.947
FN1	EGFR	4441661	4436186	9606.ENSP00000346839	9606.ENSP00000275493	0	0	0	0	0.185	0.812	0	0.684	0.947
ITGB2	FCGR2A	4446737	4435978	9606.ENSP00000380948	9606.ENSP00000271450	0	0	0	0	0.327	0	0.9	0.287	0.947
FCER1G	CD53	4436828	4435973	9606.ENSP00000289902	9606.ENSP00000271324	0	0	0	0	0.346	0	0.9	0.255	0.947
ALB	HRG	4437206	4433552	9606.ENSP00000295897	9606.ENSP00000232003	0	0	0	0	0.177	0	0.9	0.403	0.946
VCAN	TIMP1	4435552	4433052	9606.ENSP00000265077	9606.ENSP00000218388	0	0	0	0	0.064	0	0.9	0.476	0.946
ITGB2	MMP9	4446737	4443919	9606.ENSP00000380948	9606.ENSP00000361405	0	0	0	0	0.281	0	0.9	0.316	0.946
NOS1	ASS1	4451263	4443929	9606.ENSP00000477999	9606.ENSP00000361471	0	0	0	0	0.051	0	0.9	0.476	0.946
MUC1	ST6GALNAC2	4451890	4433306	9606.ENSP00000484824	9606.ENSP00000225276	0	0	0	0	0.088	0	0.9	0.455	0.945
CALB1	PVALB	4435604	4432927	9606.ENSP00000265431	9606.ENSP00000216200	0	0	0	0	0.106	0	0	0.941	0.945
CALU	ALB	4449856	4437206	9606.ENSP00000438248	9606.ENSP00000295897	0	0	0	0	0	0	0.9	0.479	0.945
NPHS1	MAGI2	4445133	4441595	9606.ENSP00000368190	9606.ENSP00000346151	0	0	0	0	0	0.123	0.9	0.42	0.944
FBP1	PFKP	4448472	4445499	9606.ENSP00000408025	9606.ENSP00000370517	0.135	0	0	0	0.061	0.07	0.8	0.687	0.944
L1CAM	ITGA5	4443451	4437011	9606.ENSP00000359077	9606.ENSP00000293379	0	0	0	0	0.063	0.379	0.9	0.156	0.944
KLHL3	WNK4	4438782	4434005	9606.ENSP00000312397	9606.ENSP00000246914	0	0	0	0	0	0.379	0	0.913	0.944
SPTBN2	ANK3	4449634	4436396	9606.ENSP00000432568	9606.ENSP00000280772	0	0	0	0	0.09	0.186	0.9	0.334	0.944
CYBB	C3AR1	4445083	4437821	9606.ENSP00000367851	9606.ENSP00000302079	0	0	0	0	0.397	0	0.9	0.159	0.944
PHKA2	PYGL	4445291	4432954	9606.ENSP00000369274	9606.ENSP00000216392	0	0	0	0	0.065	0	0.9	0.45	0.944
ITGB2	C3	4446737	4433951	9606.ENSP00000380948	9606.ENSP00000245907	0	0	0	0	0.063	0.294	0.9	0.255	0.944
TOP2A	TYMS	4448614	4439011	9606.ENSP00000411532	9606.ENSP00000315644	0.112	0	0	0	0.83	0	0	0.653	0.943
CYP2B6	CYP4A11	4439703	4438655	9606.ENSP00000324648	9606.ENSP00000311095	0	0	0.44	0.577	0.08	0	0.9	0.682	0.943
ITGAX	CYBB	4450468	4445083	9606.ENSP00000454623	9606.ENSP00000367851	0	0	0	0	0.232	0	0.9	0.319	0.943
GPC3	DCN	4446259	4432629	9606.ENSP00000377836	9606.ENSP00000052754	0	0	0	0	0.061	0.064	0.9	0.429	0.943
CP	PROC	4435459	4433614	9606.ENSP00000264613	9606.ENSP00000234071	0	0	0	0	0.111	0.379	0.9	0.09	0.943
KNG1	CP	4435537	4435459	9606.ENSP00000265023	9606.ENSP00000264613	0	0	0	0	0.108	0	0.9	0.408	0.942
ITGB2	KNG1	4446737	4435537	9606.ENSP00000380948	9606.ENSP00000265023	0	0	0	0	0.061	0.379	0.9	0.123	0.942
CD48	CD2	4451851	4443326	9606.ENSP00000484431	9606.ENSP00000358490	0	0	0	0	0.551	0.379	0	0.809	0.942
HADH	HMGCS2	4451107	4443311	9606.ENSP00000474560	9606.ENSP00000358414	0	0	0	0	0.061	0	0.9	0.433	0.942
CYP2J2	CYP4F2	4443694	4433177	9606.ENSP00000360247	9606.ENSP00000221700	0	0	0.443	0.606	0.083	0	0.9	0.709	0.942
GATA3	CCND1	4445191	4433391	9606.ENSP00000368632	9606.ENSP00000227507	0	0	0	0	0.062	0	0.9	0.434	0.942
CYP2J2	CYP4A11	4443694	4438655	9606.ENSP00000360247	9606.ENSP00000311095	0	0	0.435	0.608	0.062	0	0.9	0.73	0.941
FN1	HRG	4441661	4433552	9606.ENSP00000346839	9606.ENSP00000232003	0	0	0	0	0	0.098	0.9	0.404	0.941
KIT	STAP1	4436763	4435602	9606.ENSP00000288135	9606.ENSP00000265404	0	0	0	0	0	0.434	0.9	0	0.941
CYBB	FCER1G	4445083	4436828	9606.ENSP00000367851	9606.ENSP00000289902	0	0	0	0	0.366	0	0.9	0.151	0.941
CD300A	CEACAM1	4442338	4432684	9606.ENSP00000353259	9606.ENSP00000161559	0	0	0	0	0	0	0.9	0.441	0.941
ERBB4	ERBB2	4441238	4435897	9606.ENSP00000342235	9606.ENSP00000269571	0	0	0	0.93	0	0.404	0.9	0.924	0.941
FBP1	HK2	4448472	4436875	9606.ENSP00000408025	9606.ENSP00000290573	0	0	0	0	0.049	0	0.9	0.438	0.941
PLCG2	FCGR2A	4451677	4435978	9606.ENSP00000482457	9606.ENSP00000271450	0	0	0	0	0.092	0	0.9	0.409	0.941
EGFR	PAG1	4436186	4433123	9606.ENSP00000275493	9606.ENSP00000220597	0	0	0	0	0	0.365	0.9	0.146	0.941
NCK1	GIT2	4448885	4441723	9606.ENSP00000417273	9606.ENSP00000347464	0	0	0	0	0.061	0	0.9	0.43	0.941
PLCG2	FGFR2	4451677	4448546	9606.ENSP00000482457	9606.ENSP00000410294	0	0	0	0	0.054	0.711	0.8	0.064	0.941
LAIR1	FCER1G	4445944	4436828	9606.ENSP00000375622	9606.ENSP00000289902	0	0	0	0	0.231	0	0.9	0.294	0.941
BMPR1B	SOSTDC1	4448203	4438091	9606.ENSP00000401907	9606.ENSP00000304930	0	0	0	0	0	0	0.9	0.424	0.94
CXCR4	PIK3CG	4447439	4442215	9606.ENSP00000386884	9606.ENSP00000352121	0	0	0	0	0.114	0.265	0.9	0.199	0.94
GPC3	VCAN	4446259	4435552	9606.ENSP00000377836	9606.ENSP00000265077	0	0	0	0	0.065	0	0.9	0.416	0.94
KIT	PTPRO	4436763	4436417	9606.ENSP00000288135	9606.ENSP00000281171	0	0	0	0	0	0.413	0.9	0.058	0.939
C3AR1	CD53	4437821	4435973	9606.ENSP00000302079	9606.ENSP00000271324	0	0	0	0	0.336	0	0.9	0.167	0.939
CD36	PPARGC1A	4448068	4435507	9606.ENSP00000399421	9606.ENSP00000264867	0	0	0	0	0	0	0.9	0.422	0.939
MET	DCN	4439114	4432629	9606.ENSP00000317272	9606.ENSP00000052754	0	0	0	0	0.062	0.354	0.8	0.557	0.939
G6PC	PCK2	4434327	4432982	9606.ENSP00000253801	9606.ENSP00000216780	0	0	0	0	0.081	0	0	0.936	0.939
ENO2	PCK1	4449816	4439313	9606.ENSP00000437402	9606.ENSP00000319814	0	0	0	0	0	0	0.9	0.417	0.939
FN1	CP	4441661	4435459	9606.ENSP00000346839	9606.ENSP00000264613	0	0	0	0	0.082	0	0.9	0.39	0.939
ITGAX	LAIR1	4450468	4445944	9606.ENSP00000454623	9606.ENSP00000375622	0	0	0	0	0.246	0	0.9	0.258	0.939
CAV1	PDGFRA	4440933	4434540	9606.ENSP00000339191	9606.ENSP00000257290	0	0	0	0	0.095	0.294	0.9	0.169	0.939
TLR7	TLR3	4445433	4437339	9606.ENSP00000370034	9606.ENSP00000296795	0	0	0	0.6	0.063	0	0.9	0.938	0.938
HCK	DOCK2	4450141	4434518	9606.ENSP00000444986	9606.ENSP00000256935	0	0	0	0	0.256	0.079	0.9	0.21	0.938
ITGAX	CD53	4450468	4435973	9606.ENSP00000454623	9606.ENSP00000271324	0	0	0	0	0.285	0.064	0.9	0.184	0.938
FN1	FERMT3	4441661	4436340	9606.ENSP00000346839	9606.ENSP00000279227	0	0	0	0	0	0.08	0.9	0.382	0.938
HCK	EGF	4450141	4435570	9606.ENSP00000444986	9606.ENSP00000265171	0	0	0	0	0	0.05	0.9	0.4	0.938
NCK1	NCKAP1L	4448885	4437010	9606.ENSP00000417273	9606.ENSP00000293373	0	0	0	0	0.063	0.175	0.9	0.303	0.938
PTGER3	KNG1	4441881	4435537	9606.ENSP00000349003	9606.ENSP00000265023	0	0	0	0	0.061	0	0.9	0.398	0.938
CALU	FN1	4449856	4441661	9606.ENSP00000438248	9606.ENSP00000346839	0	0	0	0	0.158	0	0.9	0.317	0.937
TREM2	SEMA6D	4444111	4439723	9606.ENSP00000362205	9606.ENSP00000324857	0	0	0	0	0	0	0.9	0.397	0.937
SLIT2	CXCR4	4449223	4447439	9606.ENSP00000422591	9606.ENSP00000386884	0	0	0	0	0.063	0	0.9	0.376	0.936
CHST11	DCN	4438158	4432629	9606.ENSP00000305725	9606.ENSP00000052754	0	0	0	0	0	0	0.9	0.387	0.936
FN1	LGALS1	4441661	4432889	9606.ENSP00000346839	9606.ENSP00000215909	0	0	0	0	0.11	0.08	0.9	0.315	0.936
CYP2B6	CYP4F2	4439703	4433177	9606.ENSP00000324648	9606.ENSP00000221700	0	0	0.443	0.597	0.079	0	0.9	0.515	0.936
LYZ	C3	4434847	4433951	9606.ENSP00000261267	9606.ENSP00000245907	0	0	0	0	0.097	0	0.9	0.356	0.936
ERBB4	EGFR	4441238	4436186	9606.ENSP00000342235	9606.ENSP00000275493	0	0	0	0.946	0	0.347	0.9	0.905	0.935
CCL5	C3AR1	4451102	4437821	9606.ENSP00000474412	9606.ENSP00000302079	0	0	0	0	0.116	0	0.9	0.326	0.935
ENO2	PCK2	4449816	4432982	9606.ENSP00000437402	9606.ENSP00000216780	0	0	0	0	0	0	0.9	0.384	0.935
CNTN1	NFASC	4450218	4441455	9606.ENSP00000447006	9606.ENSP00000344786	0	0	0	0.695	0.227	0	0.9	0.677	0.935
ALB	VCAN	4437206	4435552	9606.ENSP00000295897	9606.ENSP00000265077	0	0	0	0	0	0	0.9	0.384	0.935
TIMP1	LGALS1	4433052	4432889	9606.ENSP00000218388	9606.ENSP00000215909	0	0	0	0	0.304	0	0.9	0.146	0.935
MMP9	CTSS	4443919	4443237	9606.ENSP00000361405	9606.ENSP00000357981	0	0	0	0	0.134	0	0.9	0.319	0.935
EGF	PDGFRA	4435570	4434540	9606.ENSP00000265171	9606.ENSP00000257290	0	0	0	0	0	0.062	0.8	0.681	0.935
CYBB	CD300A	4445083	4442338	9606.ENSP00000367851	9606.ENSP00000353259	0	0	0	0	0.383	0	0.9	0.041	0.935
TFAP2A	ERBB2	4445240	4435897	9606.ENSP00000368924	9606.ENSP00000269571	0	0	0	0	0.068	0	0.9	0.365	0.935
CHST15	VCAN	4448230	4435552	9606.ENSP00000402394	9606.ENSP00000265077	0	0	0	0	0	0	0.9	0.386	0.935
SEMA6D	TYROBP	4439723	4435115	9606.ENSP00000324857	9606.ENSP00000262629	0	0	0	0	0	0	0.9	0.381	0.935
ALOX5	CYP2B6	4444382	4439703	9606.ENSP00000363512	9606.ENSP00000324648	0	0	0	0	0	0	0.9	0.384	0.935
PLCG2	TYROBP	4451677	4435115	9606.ENSP00000482457	9606.ENSP00000262629	0	0	0	0	0.152	0	0.9	0.284	0.934
EPHX2	CYP2B6	4449539	4439703	9606.ENSP00000430269	9606.ENSP00000324648	0.056	0	0	0	0.051	0.081	0.9	0.326	0.934
EZH2	MECOM	4439336	4435476	9606.ENSP00000320147	9606.ENSP00000264674	0	0	0	0	0.051	0.164	0.9	0.269	0.934
ERBB4	EGF	4441238	4435570	9606.ENSP00000342235	9606.ENSP00000265171	0	0	0	0	0.177	0.078	0.6	0.809	0.934
CCL5	C3	4451102	4433951	9606.ENSP00000474412	9606.ENSP00000245907	0	0	0	0	0.063	0	0.9	0.356	0.934
HAO2	HOGA1	4451782	4443592	9606.ENSP00000483507	9606.ENSP00000359680	0.148	0	0	0	0.15	0	0.9	0.203	0.934
GPC3	FN1	4446259	4441661	9606.ENSP00000377836	9606.ENSP00000346839	0	0	0	0	0.078	0	0.9	0.349	0.934
LOXL2	LOX	4445831	4433517	9606.ENSP00000373783	9606.ENSP00000231004	0	0	0	0.817	0.249	0	0.9	0.804	0.933
HRG	PLAT	4433552	4433132	9606.ENSP00000232003	9606.ENSP00000220809	0	0	0	0	0.061	0	0.9	0.35	0.933
FPR3	C3AR1	4441189	4437821	9606.ENSP00000341821	9606.ENSP00000302079	0	0	0	0.787	0.329	0	0.9	0.238	0.933
ALDH6A1	ACAA1	4450308	4440473	9606.ENSP00000450436	9606.ENSP00000333664	0	0	0	0	0.189	0	0.9	0.246	0.933
ITGAX	CD300A	4450468	4442338	9606.ENSP00000454623	9606.ENSP00000353259	0	0	0	0	0.266	0	0.9	0.161	0.933
SH3GL2	EGF	4445424	4435570	9606.ENSP00000369981	9606.ENSP00000265171	0	0	0	0	0.062	0	0.9	0.349	0.933
KIF2A	CENPK	4447191	4446586	9606.ENSP00000385000	9606.ENSP00000379911	0	0	0	0	0.271	0	0.9	0.158	0.933
C1QA	TYROBP	4444428	4435115	9606.ENSP00000363773	9606.ENSP00000262629	0	0	0	0	0.897	0	0	0.363	0.932
ALOX5	CYP2J2	4444382	4443694	9606.ENSP00000363512	9606.ENSP00000360247	0	0	0	0	0	0	0.9	0.348	0.932
IGFBP3	STC2	4445494	4435556	9606.ENSP00000370473	9606.ENSP00000265087	0	0	0	0	0.156	0	0.9	0.263	0.932
APBB1IP	FN1	4444696	4441661	9606.ENSP00000365411	9606.ENSP00000346839	0	0	0	0	0	0	0.9	0.348	0.932
VEGFA	HRG	4451310	4433552	9606.ENSP00000478570	9606.ENSP00000232003	0	0	0	0	0.061	0	0.9	0.33	0.931
NTN4	LAMA4	4441104	4433505	9606.ENSP00000340998	9606.ENSP00000230538	0	0.001	0	0.562	0.198	0.195	0.9	0.085	0.931
NTNG1	CNTN3	4443452	4435291	9606.ENSP00000359085	9606.ENSP00000263665	0	0	0	0	0.083	0	0.9	0.299	0.93
CD36	TLR2	4448068	4434743	9606.ENSP00000399421	9606.ENSP00000260010	0	0	0	0	0.147	0	0.9	0.25	0.93
ITGAX	PTPRC	4450468	4448605	9606.ENSP00000454623	9606.ENSP00000411355	0	0	0	0	0.292	0.081	0	0.899	0.929
MMP9	LYZ	4443919	4434847	9606.ENSP00000361405	9606.ENSP00000261267	0	0	0	0	0.134	0	0.9	0.251	0.929
CASR	CXCR4	4449096	4447439	9606.ENSP00000420194	9606.ENSP00000386884	0	0	0	0	0	0.057	0.9	0.31	0.929
LOXL2	FBLN5	4445831	4441481	9606.ENSP00000373783	9606.ENSP00000345008	0	0	0	0	0.085	0.059	0.9	0.273	0.929
LAIR1	CEACAM1	4445944	4432684	9606.ENSP00000375622	9606.ENSP00000161559	0	0	0	0	0	0	0.9	0.328	0.929
VEGFA	MET	4451310	4439114	9606.ENSP00000478570	9606.ENSP00000317272	0	0	0	0	0.067	0	0.6	0.826	0.929
FABP6	ALB	4446212	4437206	9606.ENSP00000377549	9606.ENSP00000295897	0	0	0	0	0.061	0	0.9	0.297	0.928
SLIT2	NCK1	4449223	4448885	9606.ENSP00000422591	9606.ENSP00000417273	0	0	0	0	0	0.174	0.9	0.205	0.928
NCK1	MET	4448885	4439114	9606.ENSP00000417273	9606.ENSP00000317272	0	0	0	0	0	0.201	0.9	0.172	0.928
GBP2	GBP5	4443541	4443538	9606.ENSP00000359497	9606.ENSP00000359488	0	0	0	0.966	0.644	0	0.8	0.906	0.928
BTN3A2	BTN3A1	4441856	4436806	9606.ENSP00000348751	9606.ENSP00000289361	0	0	0	0.98	0.356	0.892	0	0.732	0.928
KIT	EGF	4436763	4435570	9606.ENSP00000288135	9606.ENSP00000265171	0	0	0	0	0	0.062	0.8	0.644	0.927
PRLR	ERBB4	4451730	4441238	9606.ENSP00000482954	9606.ENSP00000342235	0	0	0	0	0	0	0.9	0.304	0.927
PSMB8	SAMHD1	4444469	4435153	9606.ENSP00000364016	9606.ENSP00000262878	0	0	0	0	0.12	0	0.9	0.246	0.927
ITGB2	ITGA5	4446737	4437011	9606.ENSP00000380948	9606.ENSP00000293379	0	0	0	0	0.062	0.382	0.72	0.607	0.927
FN1	CEACAM1	4441661	4432684	9606.ENSP00000346839	9606.ENSP00000161559	0	0	0	0	0	0	0.9	0.307	0.927
GPC3	CSPG4	4446259	4438793	9606.ENSP00000377836	9606.ENSP00000312506	0	0	0	0	0.049	0	0.9	0.298	0.927
GBP2	ICAM1	4443541	4435501	9606.ENSP00000359497	9606.ENSP00000264832	0	0	0	0	0.149	0	0.9	0.22	0.927
CHST15	DCN	4448230	4432629	9606.ENSP00000402394	9606.ENSP00000052754	0	0	0	0	0.061	0	0.9	0.287	0.927
FABP6	ABCC3	4446212	4436623	9606.ENSP00000377549	9606.ENSP00000285238	0	0	0	0	0	0	0.9	0.291	0.926
NCK1	EGFR	4448885	4436186	9606.ENSP00000417273	9606.ENSP00000275493	0	0	0	0	0	0.878	0	0.422	0.926
CLDN8	CLDN16	4446957	4435489	9606.ENSP00000382783	9606.ENSP00000264734	0	0	0	0.637	0.061	0	0.9	0.699	0.926
SCN7A	ANK3	4447427	4436396	9606.ENSP00000386796	9606.ENSP00000280772	0	0	0	0	0	0.085	0.9	0.26	0.926
NCK1	PDGFRA	4448885	4434540	9606.ENSP00000417273	9606.ENSP00000257290	0	0	0	0	0	0.293	0.9	0.047	0.926
EPHX2	PIPOX	4449539	4439149	9606.ENSP00000430269	9606.ENSP00000317721	0.178	0	0	0	0.064	0	0.9	0.153	0.926
CXCR4	KNG1	4447439	4435537	9606.ENSP00000386884	9606.ENSP00000265023	0	0	0	0	0	0	0.9	0.291	0.926
VEGFA	TFAP2A	4451310	4445240	9606.ENSP00000478570	9606.ENSP00000368924	0	0	0	0	0.069	0	0.9	0.268	0.925
IDO1	DDC	4449569	4448281	9606.ENSP00000430950	9606.ENSP00000403644	0	0	0	0	0	0	0.9	0.283	0.925
HAO2	EPHX2	4451782	4449539	9606.ENSP00000483507	9606.ENSP00000430269	0.156	0	0	0	0.062	0	0.9	0.168	0.925
VEGFA	NCK1	4451310	4448885	9606.ENSP00000478570	9606.ENSP00000417273	0	0	0	0	0	0	0.9	0.284	0.925
CCL5	KNG1	4451102	4435537	9606.ENSP00000474412	9606.ENSP00000265023	0	0	0	0	0	0	0.9	0.284	0.925
EPHX2	DAO	4449539	4433414	9606.ENSP00000430269	9606.ENSP00000228476	0.178	0	0	0	0.061	0	0.9	0.137	0.924
NCKAP1L	FCGR2A	4437010	4435978	9606.ENSP00000293373	9606.ENSP00000271450	0	0	0	0	0.272	0	0.9	0	0.924
PIK3CG	FCER1G	4442215	4436828	9606.ENSP00000352121	9606.ENSP00000289902	0	0	0	0	0.119	0	0.9	0.211	0.924
LAIR1	CD53	4445944	4435973	9606.ENSP00000375622	9606.ENSP00000271324	0	0	0	0	0.214	0	0.9	0.112	0.924
CLDN10	CLDN16	4437562	4435489	9606.ENSP00000299339	9606.ENSP00000264734	0	0	0	0.635	0	0	0.9	0.694	0.924
KNG1	PROC	4435537	4433614	9606.ENSP00000265023	9606.ENSP00000234071	0	0	0	0	0.124	0	0.9	0.205	0.924
PTHLH	ADM	4450000	4449788	9606.ENSP00000441765	9606.ENSP00000436607	0	0	0	0	0	0	0.9	0.265	0.923
NPY5R	KNG1	4449269	4435537	9606.ENSP00000423917	9606.ENSP00000265023	0	0	0	0	0	0	0.9	0.266	0.923
EGFR	PDGFRA	4436186	4434540	9606.ENSP00000275493	9606.ENSP00000257290	0	0	0	0.562	0.107	0.418	0.8	0.737	0.923
ABCG1	SCARB1	4442587	4434927	9606.ENSP00000354995	9606.ENSP00000261693	0	0	0	0	0.061	0	0	0.92	0.923
TREM2	LCP2	4444111	4432628	9606.ENSP00000362205	9606.ENSP00000046794	0	0	0	0	0.118	0	0.9	0.203	0.923
CASR	C3	4449096	4433951	9606.ENSP00000420194	9606.ENSP00000245907	0	0	0	0	0	0	0.9	0.262	0.923
PBX1	EZH2	4448380	4439336	9606.ENSP00000405890	9606.ENSP00000320147	0	0	0	0	0	0	0.9	0.257	0.922
CD36	CYBB	4448068	4445083	9606.ENSP00000399421	9606.ENSP00000367851	0	0	0	0	0.151	0	0.9	0.154	0.922
CTSS	CTSH	4443237	4433111	9606.ENSP00000357981	9606.ENSP00000220166	0	0	0.338	0.843	0.14	0	0.9	0.582	0.922
HK2	SORD	4436875	4435781	9606.ENSP00000290573	9606.ENSP00000267814	0	0	0	0	0.079	0	0.9	0.228	0.922
HADH	ABAT	4451107	4446571	9606.ENSP00000474560	9606.ENSP00000379845	0	0	0	0	0.062	0	0.9	0.229	0.921
ITGB2	LAIR1	4446737	4445944	9606.ENSP00000380948	9606.ENSP00000375622	0	0	0	0	0.211	0	0.9	0.081	0.921
C3	TIMP1	4433951	4433052	9606.ENSP00000245907	9606.ENSP00000218388	0	0	0	0	0	0	0.9	0.249	0.921
KNG1	TIMP1	4435537	4433052	9606.ENSP00000265023	9606.ENSP00000218388	0	0	0	0	0	0	0.9	0.247	0.921
EPHX2	ACOX2	4449539	4438346	9606.ENSP00000430269	9606.ENSP00000307697	0	0	0	0	0.085	0	0.9	0.214	0.921
CXCR4	PTGER3	4447439	4441881	9606.ENSP00000386884	9606.ENSP00000349003	0	0	0	0	0	0	0.9	0.246	0.921
PDHA1	LDHD	4445276	4437622	9606.ENSP00000369134	9606.ENSP00000300051	0	0	0	0	0.061	0	0.9	0.233	0.921
CXCR4	C3	4447439	4433951	9606.ENSP00000386884	9606.ENSP00000245907	0	0	0	0	0	0	0.9	0.244	0.921
NEDD4L	KLHL3	4446996	4438782	9606.ENSP00000383199	9606.ENSP00000312397	0	0.001	0	0	0.048	0	0.9	0.244	0.921
SUCNR1	C3AR1	4442617	4437821	9606.ENSP00000355156	9606.ENSP00000302079	0	0	0	0.578	0.189	0	0.9	0.171	0.92
CDH13	CDH9	4435831	4433519	9606.ENSP00000268613	9606.ENSP00000231021	0	0	0	0.654	0.061	0	0.9	0.552	0.92
PLCG2	TREM2	4451677	4444111	9606.ENSP00000482457	9606.ENSP00000362205	0	0	0	0	0.063	0	0.9	0.22	0.92
MMP9	CTSH	4443919	4433111	9606.ENSP00000361405	9606.ENSP00000220166	0	0	0	0	0.076	0	0.9	0.207	0.92
ITGAX	SLC2A3	4450468	4432652	9606.ENSP00000454623	9606.ENSP00000075120	0	0	0	0	0.061	0	0.9	0.22	0.92
GBP2	SAMHD1	4443541	4435153	9606.ENSP00000359497	9606.ENSP00000262878	0	0	0	0	0.137	0	0.9	0.148	0.92
TFAP2A	KIT	4445240	4436763	9606.ENSP00000368924	9606.ENSP00000288135	0	0	0	0	0	0	0.9	0.241	0.92
ALB	ABCC3	4437206	4436623	9606.ENSP00000295897	9606.ENSP00000285238	0	0	0	0	0.064	0	0.9	0.213	0.919
ALOX5	CYP4F2	4444382	4433177	9606.ENSP00000363512	9606.ENSP00000221700	0	0	0	0	0	0	0.9	0.227	0.919
HCK	PTPRC	4450141	4448605	9606.ENSP00000444986	9606.ENSP00000411355	0	0	0	0	0.384	0.16	0.8	0.315	0.919
MUC1	EGFR	4451890	4436186	9606.ENSP00000484824	9606.ENSP00000275493	0	0	0	0	0.076	0.393	0	0.867	0.919
SEMA5B	PLXND1	4447616	4439102	9606.ENSP00000389588	9606.ENSP00000317128	0	0	0	0	0.055	0.188	0	0.902	0.919
CHGB	CP	4445138	4435459	9606.ENSP00000368244	9606.ENSP00000264613	0	0	0	0	0	0	0.9	0.214	0.918
NPY5R	PTGER3	4449269	4441881	9606.ENSP00000423917	9606.ENSP00000349003	0	0	0	0	0.061	0	0.9	0.2	0.918
CHGB	FN1	4445138	4441661	9606.ENSP00000368244	9606.ENSP00000346839	0	0	0	0	0	0	0.9	0.214	0.918
DCXR	SORD	4437953	4435781	9606.ENSP00000303356	9606.ENSP00000267814	0	0	0	0	0.099	0	0.9	0.171	0.918
CCL5	PTGER3	4451102	4441881	9606.ENSP00000474412	9606.ENSP00000349003	0	0	0	0	0	0.05	0.9	0.212	0.918
ENAM	ALB	4446500	4437206	9606.ENSP00000379383	9606.ENSP00000295897	0	0	0	0	0	0	0.9	0.222	0.918
LAIR1	CYBB	4445944	4445083	9606.ENSP00000375622	9606.ENSP00000367851	0	0	0	0	0.217	0	0.9	0.047	0.918
CCL20	C3	4442174	4433951	9606.ENSP00000351671	9606.ENSP00000245907	0	0	0	0	0.098	0	0.9	0.165	0.918
CP	TIMP1	4435459	4433052	9606.ENSP00000264613	9606.ENSP00000218388	0	0	0	0	0.064	0	0.9	0.186	0.917
LYZ	DOCK2	4434847	4434518	9606.ENSP00000261267	9606.ENSP00000256935	0	0	0	0	0.192	0	0.9	0.058	0.917
SEMA5B	PLXNC1	4447616	4434641	9606.ENSP00000389588	9606.ENSP00000258526	0	0	0	0	0	0.188	0	0.901	0.917
IGFBP3	VCAN	4445494	4435552	9606.ENSP00000370473	9606.ENSP00000265077	0	0	0	0	0.061	0	0.9	0.193	0.917
HCK	PTPN13	4450141	4447867	9606.ENSP00000444986	9606.ENSP00000394794	0	0	0	0	0.062	0.16	0.9	0.074	0.917
EGFR	CCND1	4436186	4433391	9606.ENSP00000275493	9606.ENSP00000227507	0	0	0	0	0.2	0.157	0	0.886	0.917
IGFBP3	KLK1	4445494	4437758	9606.ENSP00000370473	9606.ENSP00000301420	0	0	0	0	0	0	0.9	0.21	0.917
MAPK10	SORT1	4442217	4434501	9606.ENSP00000352157	9606.ENSP00000256637	0	0	0	0	0.106	0	0.9	0.151	0.917
FN1	STC2	4441661	4435556	9606.ENSP00000346839	9606.ENSP00000265087	0	0	0	0	0.152	0	0.9	0.106	0.917
LYZ	CTSH	4434847	4433111	9606.ENSP00000261267	9606.ENSP00000220166	0	0	0	0	0.121	0	0.9	0.129	0.916
SPTBN2	SCN2A	4449634	4444560	9606.ENSP00000432568	9606.ENSP00000364586	0	0	0	0	0.115	0	0.9	0.134	0.916
GPC3	IGFBP3	4446259	4445494	9606.ENSP00000377836	9606.ENSP00000370473	0	0	0	0	0.096	0	0.9	0.155	0.916
CCL5	FPR3	4451102	4441189	9606.ENSP00000474412	9606.ENSP00000341821	0	0	0	0	0.076	0.05	0.9	0.166	0.916
ADM	PTH1R	4449788	4439492	9606.ENSP00000436607	9606.ENSP00000321999	0	0	0	0	0	0	0.9	0.202	0.916
STC2	VCAN	4435556	4435552	9606.ENSP00000265087	9606.ENSP00000265077	0	0	0	0	0.06	0	0.9	0.187	0.916
VEGFA	MYOF	4451310	4442225	9606.ENSP00000478570	9606.ENSP00000352208	0	0	0	0	0.076	0	0.9	0.164	0.916
ENAM	FN1	4446500	4441661	9606.ENSP00000379383	9606.ENSP00000346839	0	0	0	0	0	0	0.9	0.195	0.916
ALB	LGALS1	4437206	4432889	9606.ENSP00000295897	9606.ENSP00000215909	0	0	0	0	0	0	0.9	0.196	0.916
C3	PROC	4433951	4433614	9606.ENSP00000245907	9606.ENSP00000234071	0	0	0	0	0.11	0.05	0.9	0.13	0.916
ENAM	KNG1	4446500	4435537	9606.ENSP00000379383	9606.ENSP00000265023	0	0	0	0	0	0.191	0.9	0.046	0.916
SUCNR1	OXGR1	4442617	4437492	9606.ENSP00000355156	9606.ENSP00000298440	0	0	0	0.817	0	0	0.9	0.905	0.916
VCAN	LGALS1	4435552	4432889	9606.ENSP00000265077	9606.ENSP00000215909	0	0	0	0	0.061	0	0.9	0.181	0.916
SLC15A4	SLC2A3	4435731	4432652	9606.ENSP00000266771	9606.ENSP00000075120	0	0	0	0	0.064	0.086	0.9	0.134	0.916
ANK2	ANK3	4441946	4436396	9606.ENSP00000349588	9606.ENSP00000280772	0	0	0	0.867	0.104	0	0.9	0.757	0.915
IGFBP3	LGALS1	4445494	4432889	9606.ENSP00000370473	9606.ENSP00000215909	0	0	0	0	0.098	0	0.9	0.137	0.915
GLDC	DAO	4445533	4433414	9606.ENSP00000370737	9606.ENSP00000228476	0	0	0	0	0.081	0	0.9	0.152	0.915
PSMB9	BIRC3	4444464	4435265	9606.ENSP00000363993	9606.ENSP00000263464	0	0	0	0	0.139	0	0.9	0.097	0.915
TFAP2B	ERBB2	4446171	4435897	9606.ENSP00000377265	9606.ENSP00000269571	0	0	0	0	0	0	0.9	0.186	0.915
PTPRC	CD2	4448605	4443326	9606.ENSP00000411355	9606.ENSP00000358490	0	0	0	0	0.539	0.379	0	0.728	0.915
IGFBP3	C3	4445494	4433951	9606.ENSP00000370473	9606.ENSP00000245907	0	0	0	0	0.091	0	0.9	0.143	0.915
SEMA6D	PLXND1	4439723	4439102	9606.ENSP00000324857	9606.ENSP00000317128	0	0	0	0	0	0.188	0	0.899	0.915
VIM	TNNT2	4450181	4433670	9606.ENSP00000446007	9606.ENSP00000236918	0	0	0	0	0.063	0	0.9	0.167	0.915
GLDC	PIPOX	4445533	4439149	9606.ENSP00000370737	9606.ENSP00000317721	0	0	0	0	0.082	0	0.9	0.152	0.915
SPTBN2	L1CAM	4449634	4443451	9606.ENSP00000432568	9606.ENSP00000359077	0	0	0	0	0.171	0	0.9	0.058	0.915
C3AR1	KNG1	4437821	4435537	9606.ENSP00000302079	9606.ENSP00000265023	0	0	0	0	0	0	0.9	0.19	0.915
EGF	HRG	4435570	4433552	9606.ENSP00000265171	9606.ENSP00000232003	0	0	0	0	0	0	0.9	0.186	0.915
ALOX5	CYP4A11	4444382	4438655	9606.ENSP00000363512	9606.ENSP00000311095	0	0	0	0	0	0	0.9	0.176	0.914
KIF13B	KIF2A	4449423	4447191	9606.ENSP00000427900	9606.ENSP00000385000	0	0	0	0.624	0	0	0.9	0.416	0.914
ACOX2	DAO	4438346	4433414	9606.ENSP00000307697	9606.ENSP00000228476	0	0	0	0	0.061	0	0.9	0.167	0.914
LAIR1	C3AR1	4445944	4437821	9606.ENSP00000375622	9606.ENSP00000302079	0	0	0	0	0.16	0	0.9	0.062	0.914
CALU	TIMP1	4449856	4433052	9606.ENSP00000438248	9606.ENSP00000218388	0	0	0	0	0.09	0	0.9	0.135	0.914
MUC1	ERBB2	4451890	4435897	9606.ENSP00000484824	9606.ENSP00000269571	0	0	0	0	0.07	0.305	0	0.878	0.914
FGF1	FGF9	4451524	4445677	9606.ENSP00000480791	9606.ENSP00000371790	0	0	0	0.846	0.065	0	0.9	0.732	0.913
GPC3	TIMP1	4446259	4433052	9606.ENSP00000377836	9606.ENSP00000218388	0	0	0	0	0	0	0.9	0.171	0.913
SUCNR1	FPR3	4442617	4441189	9606.ENSP00000355156	9606.ENSP00000341821	0	0	0	0.645	0.152	0	0.9	0.111	0.913
CTSS	TNFAIP6	4443237	4433852	9606.ENSP00000357981	9606.ENSP00000243347	0	0	0	0	0.085	0	0.9	0.133	0.913
C1QB	CSF1R	4438900	4436666	9606.ENSP00000313967	9606.ENSP00000286301	0	0	0	0	0.896	0	0	0.198	0.913
MT1G	MT1H	4447689	4440195	9606.ENSP00000391397	9606.ENSP00000330587	0	0	0	0.973	0.912	0	0	0.647	0.913
NOS1	RASD1	4451263	4433328	9606.ENSP00000477999	9606.ENSP00000225688	0	0	0	0	0	0.379	0.8	0.359	0.913
ITGB2	PLG	4446737	4438461	9606.ENSP00000380948	9606.ENSP00000308938	0	0	0	0	0.061	0	0.9	0.156	0.913
NPY5R	CASR	4449269	4449096	9606.ENSP00000423917	9606.ENSP00000420194	0	0	0	0	0.061	0.057	0.9	0.136	0.913
SLC12A3	WNK4	4448218	4434005	9606.ENSP00000402152	9606.ENSP00000246914	0	0	0	0	0.062	0.417	0	0.853	0.913
CHGB	ALB	4445138	4437206	9606.ENSP00000368244	9606.ENSP00000295897	0	0	0	0	0	0	0.9	0.169	0.913
CASR	KNG1	4449096	4435537	9606.ENSP00000420194	9606.ENSP00000265023	0	0	0	0	0	0	0.9	0.172	0.913
AGPAT9	GPD1L	4451692	4436498	9606.ENSP00000482571	9606.ENSP00000282541	0.07	0	0	0	0.062	0.046	0.9	0.122	0.913
ITGAX	CEACAM1	4450468	4432684	9606.ENSP00000454623	9606.ENSP00000161559	0	0	0	0	0	0	0.9	0.167	0.913
FN1	DCN	4441661	4432629	9606.ENSP00000346839	9606.ENSP00000052754	0	0	0	0	0.157	0.379	0	0.846	0.913
CXCR4	C3AR1	4447439	4437821	9606.ENSP00000386884	9606.ENSP00000302079	0	0	0	0.65	0.076	0	0.9	0.291	0.912
HSPA2	NR3C2	4446310	4442077	9606.ENSP00000378199	9606.ENSP00000350815	0	0	0	0	0	0.109	0.9	0.101	0.912
CSPG4	CHST11	4438793	4438158	9606.ENSP00000312506	9606.ENSP00000305725	0	0	0	0	0.061	0	0.9	0.143	0.912
SEMA6D	PLXNC1	4439723	4434641	9606.ENSP00000324857	9606.ENSP00000258526	0	0	0	0	0	0.188	0	0.896	0.912
CTSS	C1QB	4443237	4438900	9606.ENSP00000357981	9606.ENSP00000313967	0	0	0	0	0.848	0	0	0.444	0.912
TGFBI	ITGB2	4448825	4446737	9606.ENSP00000416330	9606.ENSP00000380948	0	0	0	0	0.063	0	0.9	0.144	0.912
CP	LGALS1	4435459	4432889	9606.ENSP00000264613	9606.ENSP00000215909	0	0	0	0	0.061	0	0.9	0.132	0.911
PSMB8	BIRC3	4444469	4435265	9606.ENSP00000364016	9606.ENSP00000263464	0	0	0	0	0.106	0	0.9	0.094	0.911
SCN7A	ANK2	4447427	4441946	9606.ENSP00000386796	9606.ENSP00000349588	0	0	0	0	0	0.085	0.9	0.107	0.911
SPTBN2	NFASC	4449634	4441455	9606.ENSP00000432568	9606.ENSP00000344786	0	0	0	0	0.09	0	0.9	0.103	0.911
FPR3	C3	4441189	4433951	9606.ENSP00000341821	9606.ENSP00000245907	0	0	0	0	0.09	0	0.9	0.11	0.911
CALU	LGALS1	4449856	4432889	9606.ENSP00000438248	9606.ENSP00000215909	0	0	0	0	0.083	0	0.9	0.116	0.911
CLDN8	CLDN10	4446957	4437562	9606.ENSP00000382783	9606.ENSP00000299339	0	0	0	0.839	0.062	0	0.9	0.63	0.911
SH3GL2	L1CAM	4445424	4443451	9606.ENSP00000369981	9606.ENSP00000359077	0	0	0	0	0.152	0	0.9	0	0.911
RAPGEF3	PRKAR2B	4447902	4435635	9606.ENSP00000395708	9606.ENSP00000265717	0	0	0	0.559	0	0	0.9	0.263	0.91
LAPTM5	CD53	4437079	4435973	9606.ENSP00000294507	9606.ENSP00000271324	0	0	0	0	0.816	0	0	0.532	0.91
PLCG2	NCK1	4451677	4448885	9606.ENSP00000482457	9606.ENSP00000417273	0	0	0	0.567	0.045	0	0.9	0.269	0.91
CHGB	KNG1	4445138	4435537	9606.ENSP00000368244	9606.ENSP00000265023	0	0	0	0	0	0	0.9	0.14	0.91
CYP2J2	CYP2B6	4443694	4439703	9606.ENSP00000360247	9606.ENSP00000324648	0	0	0.436	0.908	0.049	0	0.9	0.669	0.91
LPCAT1	PLA2G7	4436543	4436162	9606.ENSP00000283415	9606.ENSP00000274793	0	0	0	0	0.061	0	0.8	0.56	0.91
CYP4A11	CYP4F2	4438655	4433177	9606.ENSP00000311095	9606.ENSP00000221700	0	0	0.448	0.913	0	0	0.9	0.813	0.91
CD36	C3AR1	4448068	4437821	9606.ENSP00000399421	9606.ENSP00000302079	0	0	0	0	0.135	0	0.9	0	0.909
CD36	ITGB2	4448068	4446737	9606.ENSP00000399421	9606.ENSP00000380948	0	0	0	0	0.122	0	0.9	0.048	0.909
ITGB2	CEACAM1	4446737	4432684	9606.ENSP00000380948	9606.ENSP00000161559	0	0	0	0	0	0	0.9	0.135	0.909
CASR	OXGR1	4449096	4437492	9606.ENSP00000420194	9606.ENSP00000298440	0	0	0	0	0.061	0	0.9	0.111	0.909
CXCR4	FPR3	4447439	4441189	9606.ENSP00000386884	9606.ENSP00000341821	0	0	0	0.761	0.07	0	0.9	0.292	0.909
KLHL13	KLHL3	4450072	4438782	9606.ENSP00000443191	9606.ENSP00000312397	0	0	0	0.787	0.064	0	0.9	0.347	0.909
CD36	SLC2A3	4448068	4432652	9606.ENSP00000399421	9606.ENSP00000075120	0	0	0	0	0	0	0.9	0.128	0.909
PSMB9	EGLN3	4444464	4434133	9606.ENSP00000363993	9606.ENSP00000250457	0	0	0	0	0	0	0.9	0.13	0.909
KCNJ10	KCNJ2	4443029	4433856	9606.ENSP00000357068	9606.ENSP00000243457	0	0	0.443	0.894	0	0	0.9	0.491	0.909
LY96	BIRC3	4436604	4435265	9606.ENSP00000284818	9606.ENSP00000263464	0	0	0	0	0.088	0	0.9	0.083	0.909
CALU	IGFBP3	4449856	4445494	9606.ENSP00000438248	9606.ENSP00000370473	0	0	0	0	0.088	0	0.9	0.083	0.909
PIGR	ACPP	4441870	4439571	9606.ENSP00000348888	9606.ENSP00000323036	0	0	0	0	0.062	0	0.9	0.113	0.909
SORT1	AP1M2	4434501	4434125	9606.ENSP00000256637	9606.ENSP00000250244	0	0	0	0	0	0	0.9	0.128	0.909
GBP5	ICAM1	4443538	4435501	9606.ENSP00000359488	9606.ENSP00000264832	0	0	0	0	0.069	0	0.9	0.096	0.908
LYZ	TNFAIP6	4434847	4433852	9606.ENSP00000261267	9606.ENSP00000243347	0	0	0	0	0.078	0	0.9	0.083	0.908
GPC3	STC2	4446259	4435556	9606.ENSP00000377836	9606.ENSP00000265087	0	0	0	0	0.077	0	0.9	0.089	0.908
C3AR1	GLIPR1	4437821	4435718	9606.ENSP00000302079	9606.ENSP00000266659	0	0	0	0	0.122	0	0.9	0	0.908
TPX2	ANLN	4437665	4435644	9606.ENSP00000300403	9606.ENSP00000265748	0	0	0	0	0.839	0	0	0.455	0.908
PRKAR2B	AQP2	4435635	4432767	9606.ENSP00000265717	9606.ENSP00000199280	0.045	0	0	0	0.086	0	0.9	0.073	0.908
PTGER3	C3AR1	4441881	4437821	9606.ENSP00000349003	9606.ENSP00000302079	0	0	0	0	0	0	0.9	0.126	0.908
CCL20	PTGER3	4442174	4441881	9606.ENSP00000351671	9606.ENSP00000349003	0	0	0	0	0	0	0.9	0.12	0.908
TFAP2A	TGFA	4445240	4437149	9606.ENSP00000368924	9606.ENSP00000295400	0	0	0	0	0	0	0.9	0.121	0.908
CDH13	CDH3	4435831	4435356	9606.ENSP00000268613	9606.ENSP00000264012	0	0	0	0.802	0	0	0.9	0.429	0.908
ITGB2	SLC15A4	4446737	4435731	9606.ENSP00000380948	9606.ENSP00000266771	0	0	0	0	0.061	0	0.9	0.105	0.908
CCL20	C3AR1	4442174	4437821	9606.ENSP00000351671	9606.ENSP00000302079	0	0	0	0	0.065	0	0.9	0.096	0.908
RNASET2	LYZ	4449364	4434847	9606.ENSP00000426455	9606.ENSP00000261267	0	0	0	0	0.104	0	0.9	0.057	0.908
NOS1	PRKAR2B	4451263	4435635	9606.ENSP00000477999	9606.ENSP00000265717	0.058	0	0	0	0	0	0.9	0.1	0.907
SH3GL2	MET	4445424	4439114	9606.ENSP00000369981	9606.ENSP00000317272	0	0	0	0	0	0.073	0.9	0.081	0.907
CALU	STC2	4449856	4435556	9606.ENSP00000438248	9606.ENSP00000265087	0	0	0	0	0.111	0	0.9	0	0.907
CHST15	CSPG4	4448230	4438793	9606.ENSP00000402394	9606.ENSP00000312506	0	0	0	0	0	0	0.9	0.111	0.907
COLGALT1	COL1A1	4434239	4433346	9606.ENSP00000252599	9606.ENSP00000225964	0	0	0	0	0.08	0	0.9	0.074	0.907
PSMB9	CCND1	4444464	4433391	9606.ENSP00000363993	9606.ENSP00000227507	0	0	0	0	0	0	0.9	0.111	0.907
CD36	LAIR1	4448068	4445944	9606.ENSP00000399421	9606.ENSP00000375622	0	0	0	0	0.111	0	0.9	0.041	0.907
VCAN	KNG1	4435552	4435537	9606.ENSP00000265077	9606.ENSP00000265023	0	0	0	0	0	0	0.9	0.114	0.907
IGFBP3	KNG1	4445494	4435537	9606.ENSP00000370473	9606.ENSP00000265023	0	0	0	0	0.049	0	0.9	0.107	0.907
AGMAT	SAT2	4444634	4435878	9606.ENSP00000364986	9606.ENSP00000269298	0	0	0	0	0.062	0	0.9	0.091	0.907
ALB	FERMT3	4437206	4436340	9606.ENSP00000295897	9606.ENSP00000279227	0	0	0	0	0	0	0.9	0.111	0.907
IGFBP3	CP	4445494	4435459	9606.ENSP00000370473	9606.ENSP00000264613	0	0	0	0	0.076	0	0.9	0.076	0.907
QPRT	ENPP1	4446401	4442442	9606.ENSP00000378782	9606.ENSP00000354238	0	0	0	0	0.061	0	0.9	0.091	0.907
KCNJ1	WNK4	4446057	4434005	9606.ENSP00000376432	9606.ENSP00000246914	0	0	0	0	0	0.299	0	0.873	0.907
CYBB	CEACAM1	4445083	4432684	9606.ENSP00000367851	9606.ENSP00000161559	0	0	0	0	0.057	0	0.9	0.085	0.906
STC2	LGALS1	4435556	4432889	9606.ENSP00000265087	9606.ENSP00000215909	0	0	0	0	0.061	0	0.9	0.081	0.906
CCL5	CASR	4451102	4449096	9606.ENSP00000474412	9606.ENSP00000420194	0	0	0	0	0	0	0.9	0.1	0.906
TFAP2B	KIT	4446171	4436763	9606.ENSP00000377265	9606.ENSP00000288135	0	0	0	0	0	0	0.9	0.1	0.906
MSR1	COL1A1	4435004	4433346	9606.ENSP00000262101	9606.ENSP00000225964	0	0	0	0.595	0	0	0.9	0.187	0.906
FCER1G	FCGR2A	4436828	4435978	9606.ENSP00000289902	9606.ENSP00000271450	0	0	0	0	0.619	0	0	0.765	0.906
FPR3	KNG1	4441189	4435537	9606.ENSP00000341821	9606.ENSP00000265023	0	0	0	0	0	0	0.9	0.106	0.906
HECW1	PSMB8	4446472	4444469	9606.ENSP00000379228	9606.ENSP00000364016	0	0	0	0	0	0.087	0.9	0.062	0.906
ENPP3	PYGL	4448408	4432954	9606.ENSP00000406261	9606.ENSP00000216392	0	0	0	0	0.062	0	0.9	0.081	0.906
SUCNR1	KNG1	4442617	4435537	9606.ENSP00000355156	9606.ENSP00000265023	0	0	0	0	0.063	0	0.9	0.085	0.906
SLC12A1	KCNJ1	4446564	4446057	9606.ENSP00000379822	9606.ENSP00000376432	0	0	0	0	0.149	0	0	0.895	0.906
FN1	PROC	4441661	4433614	9606.ENSP00000346839	9606.ENSP00000234071	0	0	0	0	0	0	0.9	0.106	0.906
CTSS	ALDOC	4443237	4433361	9606.ENSP00000357981	9606.ENSP00000226253	0	0	0	0	0.052	0	0.9	0.09	0.906
CASR	GPR65	4449096	4435771	9606.ENSP00000420194	9606.ENSP00000267549	0	0	0	0	0	0.057	0.9	0.087	0.906
FXYD4	ATP1A1	4451809	4450152	9606.ENSP00000483791	9606.ENSP00000445306	0	0	0	0	0	0	0.9	0.103	0.906
IRF6	ICAM1	4442789	4435501	9606.ENSP00000355988	9606.ENSP00000264832	0	0	0	0	0	0	0.9	0.107	0.906
ALB	STC2	4437206	4435556	9606.ENSP00000295897	9606.ENSP00000265087	0	0	0	0	0.065	0	0.9	0.067	0.905
PIGR	C3AR1	4441870	4437821	9606.ENSP00000348888	9606.ENSP00000302079	0	0	0	0	0.061	0	0.9	0.072	0.905
ITGA4	CSPG4	4446627	4438793	9606.ENSP00000380227	9606.ENSP00000312506	0	0	0	0	0.082	0	0.9	0.05	0.905
SUCNR1	PTGER3	4442617	4441881	9606.ENSP00000355156	9606.ENSP00000349003	0	0	0	0	0	0	0.9	0.089	0.905
VEGFA	FERMT3	4451310	4436340	9606.ENSP00000478570	9606.ENSP00000279227	0	0	0	0	0	0	0.9	0.094	0.905
HRG	TIMP1	4433552	4433052	9606.ENSP00000232003	9606.ENSP00000218388	0	0	0	0	0	0	0.9	0.091	0.905
C3AR1	CEACAM1	4437821	4432684	9606.ENSP00000302079	9606.ENSP00000161559	0	0	0	0	0	0	0.9	0.093	0.905
CD53	CEACAM1	4435973	4432684	9606.ENSP00000271324	9606.ENSP00000161559	0	0	0	0	0	0	0.9	0.093	0.905
PROC	TIMP1	4433614	4433052	9606.ENSP00000234071	9606.ENSP00000218388	0	0	0	0	0	0	0.9	0.089	0.905
STC2	TIMP1	4435556	4433052	9606.ENSP00000265087	9606.ENSP00000218388	0	0	0	0	0.063	0	0.9	0.074	0.905
ITGB2	PLAT	4446737	4433132	9606.ENSP00000380948	9606.ENSP00000220809	0	0	0	0	0	0	0.9	0.093	0.905
GPC3	PROC	4446259	4433614	9606.ENSP00000377836	9606.ENSP00000234071	0	0	0	0	0.078	0	0.9	0.055	0.905
VCAN	C3	4435552	4433951	9606.ENSP00000265077	9606.ENSP00000245907	0	0	0	0	0	0	0.9	0.093	0.905
OXGR1	KNG1	4437492	4435537	9606.ENSP00000298440	9606.ENSP00000265023	0	0	0	0	0	0	0.9	0.09	0.905
CASR	SUCNR1	4449096	4442617	9606.ENSP00000420194	9606.ENSP00000355156	0	0	0	0	0	0	0.9	0.09	0.905
ITGA4	TGM2	4446627	4442654	9606.ENSP00000380227	9606.ENSP00000355330	0	0	0	0	0	0	0.9	0.093	0.905
SH3GL2	SORT1	4445424	4434501	9606.ENSP00000369981	9606.ENSP00000256637	0	0	0	0	0.095	0	0.9	0	0.905
ENPP1	GMPR	4442442	4434720	9606.ENSP00000354238	9606.ENSP00000259727	0	0	0	0	0	0	0.9	0.095	0.905
EGF	PAG1	4435570	4433123	9606.ENSP00000265171	9606.ENSP00000220597	0	0	0	0	0	0	0.9	0.096	0.905
MMP9	ALDOC	4443919	4433361	9606.ENSP00000361405	9606.ENSP00000226253	0	0	0	0	0.061	0	0.9	0.068	0.904
CCL5	OXGR1	4451102	4437492	9606.ENSP00000474412	9606.ENSP00000298440	0	0	0	0	0	0	0.9	0.085	0.904
CCL20	KNG1	4442174	4435537	9606.ENSP00000351671	9606.ENSP00000265023	0	0	0	0	0	0	0.9	0.081	0.904
CYBB	SLC15A4	4445083	4435731	9606.ENSP00000367851	9606.ENSP00000266771	0	0	0	0	0.062	0	0.9	0.067	0.904
CYBB	SLC2A3	4445083	4432652	9606.ENSP00000367851	9606.ENSP00000075120	0	0	0	0	0	0	0.9	0.08	0.904
CALU	VCAN	4449856	4435552	9606.ENSP00000438248	9606.ENSP00000265077	0	0	0	0	0.061	0	0.9	0.06	0.904
CCL20	FPR3	4442174	4441189	9606.ENSP00000351671	9606.ENSP00000341821	0	0	0	0	0.065	0	0.9	0.058	0.904
XPNPEP2	VNN2	4443668	4439513	9606.ENSP00000360147	9606.ENSP00000322276	0.045	0	0	0	0.084	0	0.9	0	0.904
ENTPD1	TYMS	4443695	4439011	9606.ENSP00000360250	9606.ENSP00000315644	0	0	0	0	0.063	0	0.9	0.067	0.904
FERMT3	EGF	4436340	4435570	9606.ENSP00000279227	9606.ENSP00000265171	0	0	0	0	0	0	0.9	0.088	0.904
CASR	QRFPR	4449096	4446272	9606.ENSP00000420194	9606.ENSP00000377948	0	0	0	0	0	0	0.9	0.08	0.904
CD36	CD53	4448068	4435973	9606.ENSP00000399421	9606.ENSP00000271324	0	0	0	0	0.088	0	0.9	0	0.904
ITGB2	PROC	4446737	4433614	9606.ENSP00000380948	9606.ENSP00000234071	0	0	0	0	0.081	0	0.9	0	0.904
C3	LGALS1	4433951	4432889	9606.ENSP00000245907	9606.ENSP00000215909	0	0	0	0	0.049	0	0.9	0.08	0.904
CXCR4	SUCNR1	4447439	4442617	9606.ENSP00000386884	9606.ENSP00000355156	0	0	0	0.663	0.065	0	0.9	0.073	0.903
BIRC3	USP2	4435265	4434754	9606.ENSP00000263464	9606.ENSP00000260187	0	0	0	0	0	0	0.9	0.074	0.903
NMI	CCND1	4433851	4433391	9606.ENSP00000243346	9606.ENSP00000227507	0	0	0	0	0	0	0.9	0.077	0.903
CALU	C3	4449856	4433951	9606.ENSP00000438248	9606.ENSP00000245907	0	0	0	0	0	0	0.9	0.076	0.903
SPTBN2	KIF2A	4449634	4447191	9606.ENSP00000432568	9606.ENSP00000385000	0	0	0	0	0.062	0.051	0.9	0	0.903
ITGB2	TYROBP	4446737	4435115	9606.ENSP00000380948	9606.ENSP00000262629	0	0	0	0	0.852	0	0	0.377	0.903
FERMT3	TIMP1	4436340	4433052	9606.ENSP00000279227	9606.ENSP00000218388	0	0	0	0	0.062	0	0.9	0.052	0.903
CALU	KNG1	4449856	4435537	9606.ENSP00000438248	9606.ENSP00000265023	0	0	0	0	0	0	0.9	0.074	0.903
CYBB	MMP9	4445083	4443919	9606.ENSP00000367851	9606.ENSP00000361405	0	0	0	0	0.17	0	0.65	0.695	0.903
HECW1	PSMB9	4446472	4444464	9606.ENSP00000379228	9606.ENSP00000363993	0	0	0	0	0.052	0	0.9	0.067	0.903
KNG1	LGALS1	4435537	4432889	9606.ENSP00000265023	9606.ENSP00000215909	0	0	0	0	0.063	0	0.9	0.056	0.903
FPR3	OXGR1	4441189	4437492	9606.ENSP00000341821	9606.ENSP00000298440	0	0	0	0.637	0	0	0.9	0.146	0.903
PSMB8	CCND1	4444469	4433391	9606.ENSP00000364016	9606.ENSP00000227507	0	0	0	0	0	0	0.9	0.073	0.903
GPC3	CP	4446259	4435459	9606.ENSP00000377836	9606.ENSP00000264613	0	0	0	0	0.064	0	0.9	0.053	0.903
CASR	PTGER3	4449096	4441881	9606.ENSP00000420194	9606.ENSP00000349003	0	0	0	0	0	0.057	0.9	0.063	0.903
ENPP3	QPRT	4448408	4446401	9606.ENSP00000406261	9606.ENSP00000378782	0	0	0	0	0.061	0	0.9	0.056	0.903
CASR	FPR3	4449096	4441189	9606.ENSP00000420194	9606.ENSP00000341821	0	0	0	0	0	0.057	0.9	0.058	0.903
PFKFB2	PFKFB4	4442802	4433556	9606.ENSP00000356047	9606.ENSP00000232375	0	0	0.445	0.971	0	0	0.9	0.678	0.903
LAIR1	SLC15A4	4445944	4435731	9606.ENSP00000375622	9606.ENSP00000266771	0	0	0	0	0.064	0	0.9	0.056	0.903
CD300A	SLC2A3	4442338	4432652	9606.ENSP00000353259	9606.ENSP00000075120	0	0	0	0	0.07	0	0.9	0	0.903
ALDOC	CTSH	4433361	4433111	9606.ENSP00000226253	9606.ENSP00000220166	0	0	0	0	0.052	0	0.9	0.063	0.903
ENPP1	PYGL	4442442	4432954	9606.ENSP00000354238	9606.ENSP00000216392	0	0	0	0	0.061	0	0.9	0.055	0.903
STC2	C3	4435556	4433951	9606.ENSP00000265087	9606.ENSP00000245907	0	0	0	0	0	0	0.9	0.07	0.903
TFAP2A	ATAD2	4445240	4436722	9606.ENSP00000368924	9606.ENSP00000287394	0	0	0	0	0.073	0	0.9	0	0.903
CD36	SLC15A4	4448068	4435731	9606.ENSP00000399421	9606.ENSP00000266771	0	0	0	0	0.063	0	0.9	0.049	0.903
IRF6	SAMHD1	4442789	4435153	9606.ENSP00000355988	9606.ENSP00000262878	0	0	0	0	0.062	0	0.9	0.053	0.903
CEACAM1	SLC2A3	4432684	4432652	9606.ENSP00000161559	9606.ENSP00000075120	0	0	0	0	0	0	0.9	0.073	0.903
NPY5R	CXCR4	4449269	4447439	9606.ENSP00000423917	9606.ENSP00000386884	0	0	0	0.574	0	0	0.9	0.13	0.903
MET	LAMA4	4439114	4433505	9606.ENSP00000317272	9606.ENSP00000230538	0	0	0	0	0.063	0	0.9	0.053	0.903
TPD52L1	SORT1	4449699	4434501	9606.ENSP00000434142	9606.ENSP00000256637	0	0	0	0	0.061	0	0.9	0	0.902
GPC3	KNG1	4446259	4435537	9606.ENSP00000377836	9606.ENSP00000265023	0	0	0	0	0	0	0.9	0.065	0.902
CHGB	VCAN	4445138	4435552	9606.ENSP00000368244	9606.ENSP00000265077	0	0	0	0	0	0	0.9	0.063	0.902
MUC15	ST6GALNAC2	4448848	4433306	9606.ENSP00000416753	9606.ENSP00000225276	0	0	0	0	0	0	0.9	0.064	0.902
CALU	GPC3	4449856	4446259	9606.ENSP00000438248	9606.ENSP00000377836	0	0	0	0	0.065	0	0.9	0	0.902
C3AR1	SLC15A4	4437821	4435731	9606.ENSP00000302079	9606.ENSP00000266771	0	0	0	0	0.062	0	0.9	0	0.902
SUCNR1	C3	4442617	4433951	9606.ENSP00000355156	9606.ENSP00000245907	0	0	0	0	0.064	0	0.9	0	0.902
NPY5R	OXGR1	4449269	4437492	9606.ENSP00000423917	9606.ENSP00000298440	0	0	0	0.572	0.065	0	0.9	0	0.902
SPTBN2	SCN7A	4449634	4447427	9606.ENSP00000432568	9606.ENSP00000386796	0	0	0	0	0.064	0	0.9	0	0.902
C3AR1	SLC2A3	4437821	4432652	9606.ENSP00000302079	9606.ENSP00000075120	0	0	0	0	0.061	0	0.9	0	0.902
TPD52L1	AP1M2	4449699	4434125	9606.ENSP00000434142	9606.ENSP00000250244	0	0	0	0	0.061	0	0.9	0	0.902
CD163	CSF1R	4442211	4436666	9606.ENSP00000352071	9606.ENSP00000286301	0	0	0	0	0.779	0	0	0.575	0.902
CD53	SLC2A3	4435973	4432652	9606.ENSP00000271324	9606.ENSP00000075120	0	0	0	0	0.063	0	0.9	0	0.902
SH3GL2	AP1M2	4445424	4434125	9606.ENSP00000369981	9606.ENSP00000250244	0	0	0	0	0	0	0.9	0.063	0.902
CHGB	C3	4445138	4433951	9606.ENSP00000368244	9606.ENSP00000245907	0	0	0	0	0	0	0.9	0.066	0.902
GP2	XPNPEP2	4445540	4443668	9606.ENSP00000370767	9606.ENSP00000360147	0	0	0	0	0.061	0	0.9	0	0.902
ENTPD1	GMPR	4443695	4434720	9606.ENSP00000360250	9606.ENSP00000259727	0	0	0	0	0.061	0	0.9	0.049	0.902
COL4A1	COLGALT1	4444632	4434239	9606.ENSP00000364979	9606.ENSP00000252599	0	0	0	0	0.061	0	0.9	0.049	0.902
CCL5	NPY5R	4451102	4449269	9606.ENSP00000474412	9606.ENSP00000423917	0	0	0	0	0	0.05	0.9	0.054	0.902
TFAP2B	CAV1	4446171	4440933	9606.ENSP00000377265	9606.ENSP00000339191	0	0	0	0	0.062	0	0.9	0	0.902
ITGA5	CEACAM1	4437011	4432684	9606.ENSP00000293379	9606.ENSP00000161559	0	0	0	0	0	0	0.9	0.069	0.902
TNFAIP6	ALDOC	4433852	4433361	9606.ENSP00000243347	9606.ENSP00000226253	0	0	0	0	0	0	0.9	0.066	0.902
GPC3	C3	4446259	4433951	9606.ENSP00000377836	9606.ENSP00000245907	0	0	0	0	0	0	0.9	0.069	0.902
PTGER3	C3	4441881	4433951	9606.ENSP00000349003	9606.ENSP00000245907	0	0	0	0	0	0	0.9	0.069	0.902
SPTBN2	FOLR1	4449634	4446175	9606.ENSP00000432568	9606.ENSP00000377284	0	0	0	0	0.066	0	0.9	0	0.902
TPD52L1	SH3GL2	4449699	4445424	9606.ENSP00000434142	9606.ENSP00000369981	0	0	0	0	0.061	0	0.9	0	0.902
CCL5	SUCNR1	4451102	4442617	9606.ENSP00000474412	9606.ENSP00000355156	0	0	0	0	0.067	0	0.9	0	0.902
ITGB2	SLC2A3	4446737	4432652	9606.ENSP00000380948	9606.ENSP00000075120	0	0	0	0	0.063	0	0.9	0	0.902
GP2	VNN2	4445540	4439513	9606.ENSP00000370767	9606.ENSP00000322276	0	0	0	0	0	0	0.9	0.068	0.902
NTNG1	VNN2	4443452	4439513	9606.ENSP00000359085	9606.ENSP00000322276	0	0	0	0	0.062	0	0.9	0	0.902
GIT2	LAMA4	4441723	4433505	9606.ENSP00000347464	9606.ENSP00000230538	0	0	0	0	0.064	0	0.9	0	0.902
IGFBP3	PROC	4445494	4433614	9606.ENSP00000370473	9606.ENSP00000234071	0	0	0	0	0.062	0	0.9	0	0.902
COL5A2	COLGALT1	4444466	4434239	9606.ENSP00000364000	9606.ENSP00000252599	0	0	0	0	0	0	0.9	0.056	0.901
RNASET2	C3	4449364	4433951	9606.ENSP00000426455	9606.ENSP00000245907	0	0	0	0	0.056	0	0.9	0	0.901
CD36	CEACAM1	4448068	4432684	9606.ENSP00000399421	9606.ENSP00000161559	0	0	0	0	0.052	0	0.9	0	0.901
ENPP3	GMPR	4448408	4434720	9606.ENSP00000406261	9606.ENSP00000259727	0	0	0	0	0	0	0.9	0.052	0.901
ACPP	C3AR1	4439571	4437821	9606.ENSP00000323036	9606.ENSP00000302079	0	0	0	0	0	0	0.9	0.053	0.901
FOLR1	ANK2	4446175	4441946	9606.ENSP00000377284	9606.ENSP00000349588	0	0	0	0	0	0.059	0.9	0	0.901
FOLR1	ANK3	4446175	4436396	9606.ENSP00000377284	9606.ENSP00000280772	0	0	0	0	0	0.059	0.9	0	0.901
CDH3	CDH9	4435356	4433519	9606.ENSP00000264012	9606.ENSP00000231021	0	0	0	0.779	0	0	0.9	0.087	0.901
VCAN	CP	4435552	4435459	9606.ENSP00000265077	9606.ENSP00000264613	0	0	0	0	0	0	0.9	0.053	0.901
FOLR1	TGFA	4446175	4437149	9606.ENSP00000377284	9606.ENSP00000295400	0	0	0	0	0	0	0.9	0.053	0.901
KLHL13	NEDD4L	4450072	4446996	9606.ENSP00000443191	9606.ENSP00000383199	0	0	0	0	0.052	0	0.9	0	0.901
PIGR	GLIPR1	4441870	4435718	9606.ENSP00000348888	9606.ENSP00000266659	0	0	0	0	0.054	0	0.9	0	0.901
TNFAIP6	CTSH	4433852	4433111	9606.ENSP00000243347	9606.ENSP00000220166	0	0	0	0	0.05	0	0.9	0.051	0.901
NPY5R	C3	4449269	4433951	9606.ENSP00000423917	9606.ENSP00000245907	0	0	0	0	0	0	0.9	0.057	0.901
PTGER3	FPR3	4441881	4441189	9606.ENSP00000349003	9606.ENSP00000341821	0	0	0	0	0	0	0.9	0.053	0.901
L1CAM	RPS6KA6	4443451	4435134	9606.ENSP00000359077	9606.ENSP00000262752	0	0	0	0	0	0	0.9	0.057	0.901
COL4A1	ENPP1	4444632	4442442	9606.ENSP00000364979	9606.ENSP00000354238	0	0	0	0	0	0	0.9	0.057	0.901
ABAT	SORD	4446571	4435781	9606.ENSP00000379845	9606.ENSP00000267814	0.16	0	0	0	0.062	0.867	0	0.175	0.901
TRIM2	ICAM1	4440975	4435501	9606.ENSP00000339659	9606.ENSP00000264832	0	0	0	0	0	0	0.9	0	0.9
IRF6	TRIM2	4442789	4440975	9606.ENSP00000355988	9606.ENSP00000339659	0	0	0	0	0	0	0.9	0	0.9
SH3GL2	RPS6KA6	4445424	4435134	9606.ENSP00000369981	9606.ENSP00000262752	0	0	0	0	0	0	0.9	0	0.9
PTGER3	OXGR1	4441881	4437492	9606.ENSP00000349003	9606.ENSP00000298440	0	0	0	0	0	0	0.9	0	0.9
SCN7A	NFASC	4447427	4441455	9606.ENSP00000386796	9606.ENSP00000344786	0	0	0	0	0	0	0.9	0.047	0.9
CCL20	OXGR1	4442174	4437492	9606.ENSP00000351671	9606.ENSP00000298440	0	0	0	0	0	0	0.9	0	0.9
QRFPR	KNG1	4446272	4435537	9606.ENSP00000377948	9606.ENSP00000265023	0	0	0	0	0	0	0.9	0	0.9
FERMT3	SERPINE1	4436340	4433266	9606.ENSP00000279227	9606.ENSP00000223095	0	0	0	0	0	0	0.9	0	0.9
STC2	CP	4435556	4435459	9606.ENSP00000265087	9606.ENSP00000264613	0	0	0	0	0	0	0.9	0	0.9
GP2	NTNG1	4445540	4443452	9606.ENSP00000370767	9606.ENSP00000359085	0	0	0	0	0	0	0.9	0	0.9
C3AR1	OXGR1	4437821	4437492	9606.ENSP00000302079	9606.ENSP00000298440	0	0	0	0.617	0	0	0.9	0	0.9
PSMB8	EGLN3	4444469	4434133	9606.ENSP00000364016	9606.ENSP00000250457	0	0	0	0	0	0	0.9	0.049	0.9
ACAA1	DOCK2	4440473	4434518	9606.ENSP00000333664	9606.ENSP00000256935	0	0	0	0	0	0	0.9	0	0.9
SUCNR1	CCL20	4442617	4442174	9606.ENSP00000355156	9606.ENSP00000351671	0	0	0	0	0	0	0.9	0	0.9
GBP5	IRF6	4443538	4442789	9606.ENSP00000359488	9606.ENSP00000355988	0	0	0	0	0	0	0.9	0	0.9
ENAM	PROC	4446500	4433614	9606.ENSP00000379383	9606.ENSP00000234071	0	0	0	0	0	0	0.9	0	0.9
GBP5	TRIM2	4443538	4440975	9606.ENSP00000359488	9606.ENSP00000339659	0	0	0	0	0	0	0.9	0	0.9
GBP2	TRIM2	4443541	4440975	9606.ENSP00000359497	9606.ENSP00000339659	0	0	0	0	0	0	0.9	0	0.9
PLCG2	LY96	4451677	4436604	9606.ENSP00000482457	9606.ENSP00000284818	0	0	0	0	0	0	0.9	0.046	0.9
STC2	PROC	4435556	4433614	9606.ENSP00000265087	9606.ENSP00000234071	0	0	0	0	0	0	0.9	0	0.9
FCER1G	SLC2A3	4436828	4432652	9606.ENSP00000289902	9606.ENSP00000075120	0	0	0	0	0	0	0.9	0	0.9
CHGB	LGALS1	4445138	4432889	9606.ENSP00000368244	9606.ENSP00000215909	0	0	0	0	0	0	0.9	0	0.9
CASR	C3AR1	4449096	4437821	9606.ENSP00000420194	9606.ENSP00000302079	0	0	0	0	0	0	0.9	0	0.9
QRFPR	GPR65	4446272	4435771	9606.ENSP00000377948	9606.ENSP00000267549	0	0	0	0.612	0	0	0.9	0	0.9
CALU	CHGB	4449856	4445138	9606.ENSP00000438248	9606.ENSP00000368244	0	0	0	0	0	0	0.9	0	0.9
OXGR1	C3	4437492	4433951	9606.ENSP00000298440	9606.ENSP00000245907	0	0	0	0	0	0	0.9	0	0.9
ENAM	GPC3	4446500	4446259	9606.ENSP00000379383	9606.ENSP00000377836	0	0	0	0	0	0	0.9	0	0.9
VCAN	PROC	4435552	4433614	9606.ENSP00000265077	9606.ENSP00000234071	0	0	0	0	0	0	0.9	0	0.9
CYFIP2	FCGR2A	4450126	4435978	9606.ENSP00000444645	9606.ENSP00000271450	0	0	0	0	0	0	0.9	0	0.9
FERMT3	HRG	4436340	4433552	9606.ENSP00000279227	9606.ENSP00000232003	0	0	0	0	0	0	0.9	0	0.9
ACPP	GLIPR1	4439571	4435718	9606.ENSP00000323036	9606.ENSP00000266659	0	0	0	0	0	0	0.9	0	0.9
CD2	PRKAR2B	4443326	4435635	9606.ENSP00000358490	9606.ENSP00000265717	0	0	0	0	0	0	0.9	0	0.9
SLC15A4	CEACAM1	4435731	4432684	9606.ENSP00000266771	9606.ENSP00000161559	0	0	0	0	0	0	0.9	0	0.9
STC2	KNG1	4435556	4435537	9606.ENSP00000265087	9606.ENSP00000265023	0	0	0	0	0	0	0.9	0.041	0.9
ACPP	LPCAT1	4439571	4436543	9606.ENSP00000323036	9606.ENSP00000283415	0	0	0	0	0	0	0.9	0	0.9
XPNPEP2	CNTN3	4443668	4435291	9606.ENSP00000360147	9606.ENSP00000263665	0	0	0	0	0	0	0.9	0	0.9
GPC3	CHGB	4446259	4445138	9606.ENSP00000377836	9606.ENSP00000368244	0	0	0	0	0	0	0.9	0	0.9
GBP2	IRF6	4443541	4442789	9606.ENSP00000359497	9606.ENSP00000355988	0	0	0	0	0	0	0.9	0	0.9
GP2	CNTN3	4445540	4435291	9606.ENSP00000370767	9606.ENSP00000263665	0	0	0	0	0	0	0.9	0	0.9
ENAM	CP	4446500	4435459	9606.ENSP00000379383	9606.ENSP00000264613	0	0	0	0	0	0	0.9	0	0.9
CALU	CP	4449856	4435459	9606.ENSP00000438248	9606.ENSP00000264613	0	0	0	0	0	0	0.9	0.041	0.9
XPNPEP2	NTNG1	4443668	4443452	9606.ENSP00000360147	9606.ENSP00000359085	0	0	0	0	0	0	0.9	0	0.9
ENAM	VCAN	4446500	4435552	9606.ENSP00000379383	9606.ENSP00000265077	0	0	0	0	0	0	0.9	0	0.9
CALU	ENAM	4449856	4446500	9606.ENSP00000438248	9606.ENSP00000379383	0	0	0	0	0	0	0.9	0	0.9
CHGB	STC2	4445138	4435556	9606.ENSP00000368244	9606.ENSP00000265087	0	0	0	0	0	0	0.9	0	0.9
ACAA1	LYZ	4440473	4434847	9606.ENSP00000333664	9606.ENSP00000261267	0	0	0	0	0	0	0.9	0	0.9
PSMB8	IRF6	4444469	4442789	9606.ENSP00000364016	9606.ENSP00000355988	0	0	0	0	0	0	0.9	0	0.9
ABCA1	SCARB1	4444444	4434927	9606.ENSP00000363868	9606.ENSP00000261693	0	0	0	0	0.061	0	0	0.898	0.9
COL4A1	MSR1	4444632	4435004	9606.ENSP00000364979	9606.ENSP00000262101	0	0	0	0.556	0	0	0.9	0	0.9
LAIR1	SLC2A3	4445944	4432652	9606.ENSP00000375622	9606.ENSP00000075120	0	0	0	0	0	0	0.9	0	0.9
PIGR	LPCAT1	4441870	4436543	9606.ENSP00000348888	9606.ENSP00000283415	0	0	0	0	0	0	0.9	0	0.9
LYZ	ALDOC	4434847	4433361	9606.ENSP00000261267	9606.ENSP00000226253	0	0	0	0	0	0	0.9	0	0.9
PROC	LGALS1	4433614	4432889	9606.ENSP00000234071	9606.ENSP00000215909	0	0	0	0	0	0	0.9	0	0.9
CXCR4	OXGR1	4447439	4437492	9606.ENSP00000386884	9606.ENSP00000298440	0	0	0	0.735	0	0	0.9	0	0.9
LPCAT1	GLIPR1	4436543	4435718	9606.ENSP00000283415	9606.ENSP00000266659	0	0	0	0	0	0	0.9	0	0.9
ENAM	STC2	4446500	4435556	9606.ENSP00000379383	9606.ENSP00000265087	0	0	0	0	0	0	0.9	0	0.9
FCER1G	CEACAM1	4436828	4432684	9606.ENSP00000289902	9606.ENSP00000161559	0	0	0	0	0.048	0	0.9	0.043	0.9
C1QA	CSF1R	4444428	4436666	9606.ENSP00000363773	9606.ENSP00000286301	0	0	0	0	0.876	0	0	0.226	0.9
CHGB	TIMP1	4445138	4433052	9606.ENSP00000368244	9606.ENSP00000218388	0	0	0	0	0	0	0.9	0	0.9
NPY5R	SUCNR1	4449269	4442617	9606.ENSP00000423917	9606.ENSP00000355156	0	0	0	0	0	0	0.9	0	0.9
ENAM	CHGB	4446500	4445138	9606.ENSP00000379383	9606.ENSP00000368244	0	0	0	0	0	0	0.9	0	0.9
ENAM	TIMP1	4446500	4433052	9606.ENSP00000379383	9606.ENSP00000218388	0	0	0	0	0	0	0.9	0	0.9
NPY5R	C3AR1	4449269	4437821	9606.ENSP00000423917	9606.ENSP00000302079	0	0	0	0.558	0	0	0.9	0	0.9
PLG	FERMT3	4438461	4436340	9606.ENSP00000308938	9606.ENSP00000279227	0	0	0	0	0	0	0.9	0.049	0.9
C3AR1	LPCAT1	4437821	4436543	9606.ENSP00000302079	9606.ENSP00000283415	0	0	0	0	0	0	0.9	0	0.9
CHGB	PROC	4445138	4433614	9606.ENSP00000368244	9606.ENSP00000234071	0	0	0	0	0	0	0.9	0	0.9
CASR	CCL20	4449096	4442174	9606.ENSP00000420194	9606.ENSP00000351671	0	0	0	0	0	0	0.9	0	0.9
IGFBP3	CHGB	4445494	4445138	9606.ENSP00000370473	9606.ENSP00000368244	0	0	0	0	0	0	0.9	0	0.9
FERMT3	KNG1	4436340	4435537	9606.ENSP00000279227	9606.ENSP00000265023	0	0	0	0	0	0	0.9	0	0.9
ENAM	IGFBP3	4446500	4445494	9606.ENSP00000379383	9606.ENSP00000370473	0	0	0	0	0	0	0.9	0	0.9
NPY5R	FPR3	4449269	4441189	9606.ENSP00000423917	9606.ENSP00000341821	0	0	0	0	0	0	0.9	0	0.9
TPX2	PRKAR2B	4437665	4435635	9606.ENSP00000300403	9606.ENSP00000265717	0	0	0	0	0	0	0.9	0	0.9
CALU	PROC	4449856	4433614	9606.ENSP00000438248	9606.ENSP00000234071	0	0	0	0	0	0	0.9	0	0.9
VNN2	CNTN3	4439513	4435291	9606.ENSP00000322276	9606.ENSP00000263665	0	0	0	0	0	0	0.9	0	0.9
GPC3	LGALS1	4446259	4432889	9606.ENSP00000377836	9606.ENSP00000215909	0	0	0	0	0	0	0.9	0.049	0.9
NPY5R	CCL20	4449269	4442174	9606.ENSP00000423917	9606.ENSP00000351671	0	0	0	0	0	0	0.9	0	0.9
CD53	SLC15A4	4435973	4435731	9606.ENSP00000271324	9606.ENSP00000266771	0	0	0	0	0	0	0.9	0	0.9
ENAM	LGALS1	4446500	4432889	9606.ENSP00000379383	9606.ENSP00000215909	0	0	0	0	0	0	0.9	0	0.9
GPR65	KNG1	4435771	4435537	9606.ENSP00000267549	9606.ENSP00000265023	0	0	0	0	0	0	0.9	0	0.9
ENAM	C3	4446500	4433951	9606.ENSP00000379383	9606.ENSP00000245907	0	0	0	0	0	0	0.9	0	0.9
ALDOB	G6PC	4444463	4434327	9606.ENSP00000363988	9606.ENSP00000253801	0	0	0	0	0.145	0	0.8	0.458	0.899
VEGFA	PDGFRA	4451310	4434540	9606.ENSP00000478570	9606.ENSP00000257290	0	0	0	0	0.059	0.465	0.6	0.558	0.899
CEL	LIPA	4443875	4440780	9606.ENSP00000361151	9606.ENSP00000337354	0	0	0	0	0.061	0	0.8	0.507	0.899
FN1	LOX	4441661	4433517	9606.ENSP00000346839	9606.ENSP00000231004	0	0	0	0	0.36	0.305	0	0.789	0.898
PCK1	G6PC	4439313	4434327	9606.ENSP00000319814	9606.ENSP00000253801	0	0	0	0	0.164	0	0	0.882	0.897
MKI67	TPX2	4443142	4437665	9606.ENSP00000357643	9606.ENSP00000300403	0	0	0	0	0.852	0	0	0.33	0.896
NRP2	PLXNB1	4442374	4442133	9606.ENSP00000353582	9606.ENSP00000351338	0	0	0	0	0.061	0.169	0.72	0.582	0.896
CD36	GP2	4448068	4445540	9606.ENSP00000399421	9606.ENSP00000370767	0	0	0	0	0	0	0	0.895	0.895
C1QC	TYROBP	4444427	4435115	9606.ENSP00000363770	9606.ENSP00000262629	0	0	0	0	0.85	0	0	0.334	0.895
KLK1	KNG1	4437758	4435537	9606.ENSP00000301420	9606.ENSP00000265023	0	0	0	0	0.05	0.379	0	0.836	0.894
SUCLG1	OXCT1	4446196	4432761	9606.ENSP00000377446	9606.ENSP00000196371	0	0	0	0	0.063	0.817	0	0.431	0.893
HK2	G6PC	4436875	4434327	9606.ENSP00000290573	9606.ENSP00000253801	0	0	0	0	0.051	0	0.8	0.484	0.893
NPHS1	WT1	4445133	4440250	9606.ENSP00000368190	9606.ENSP00000331327	0	0	0	0	0	0.059	0	0.889	0.892
VEGFA	ICAM1	4451310	4435501	9606.ENSP00000478570	9606.ENSP00000264832	0	0	0	0	0	0	0	0.89	0.89
C1QB	TYROBP	4438900	4435115	9606.ENSP00000313967	9606.ENSP00000262629	0	0	0	0	0.827	0	0	0.39	0.89
HADH	ACADSB	4451107	4443211	9606.ENSP00000474560	9606.ENSP00000357873	0.071	0.002	0.37	0	0.574	0	0	0.61	0.89
MB21D1	IFI16	4443500	4443043	9606.ENSP00000359339	9606.ENSP00000357113	0	0	0	0	0	0	0	0.89	0.89
ENO2	ALDOC	4449816	4433361	9606.ENSP00000437402	9606.ENSP00000226253	0	0	0	0	0.327	0.053	0.6	0.617	0.889
ERBB4	TGFA	4441238	4437149	9606.ENSP00000342235	9606.ENSP00000295400	0	0	0	0	0	0.379	0.6	0.588	0.888
ERBB2	CCND1	4435897	4433391	9606.ENSP00000269571	9606.ENSP00000227507	0	0	0	0	0.098	0.43	0	0.799	0.888
NUSAP1	TYMS	4450429	4439011	9606.ENSP00000453403	9606.ENSP00000315644	0	0	0	0	0.847	0	0	0.292	0.887
FRAS1	FREM2	4439842	4436379	9606.ENSP00000326330	9606.ENSP00000280481	0	0	0	0.552	0.109	0.784	0	0.94	0.883
TOP2A	ANLN	4448614	4435644	9606.ENSP00000411532	9606.ENSP00000265748	0	0	0	0	0.834	0	0	0.326	0.883
PDHA1	ALDOC	4445276	4433361	9606.ENSP00000369134	9606.ENSP00000226253	0	0	0	0	0.085	0	0.8	0.407	0.882
FGF1	EGFR	4451524	4436186	9606.ENSP00000480791	9606.ENSP00000275493	0	0	0	0	0.088	0	0.6	0.703	0.882
CD86	TLR2	4440320	4434743	9606.ENSP00000332049	9606.ENSP00000260010	0	0	0	0	0.288	0	0	0.839	0.881
VEGFA	CSF1R	4451310	4436666	9606.ENSP00000478570	9606.ENSP00000286301	0	0	0	0	0	0.174	0.6	0.67	0.881
PTPRC	KIT	4448605	4436763	9606.ENSP00000411355	9606.ENSP00000288135	0	0	0	0	0	0.094	0	0.874	0.881
PTPRC	ITGB2	4448605	4446737	9606.ENSP00000411355	9606.ENSP00000380948	0	0	0	0	0.763	0.185	0	0.429	0.88
ITGB2	LAPTM5	4446737	4437079	9606.ENSP00000380948	9606.ENSP00000294507	0	0	0	0	0.847	0	0	0.25	0.88
KL	TRPV5	4445327	4435580	9606.ENSP00000369442	9606.ENSP00000265310	0	0	0	0	0.062	0.299	0	0.83	0.879
VEGFA	CXCR4	4451310	4447439	9606.ENSP00000478570	9606.ENSP00000386884	0	0	0	0	0	0	0	0.878	0.879
TOP2A	ATAD2	4448614	4436722	9606.ENSP00000411532	9606.ENSP00000287394	0.051	0	0	0	0.788	0.264	0	0.278	0.879
PDHA1	ALDOB	4445276	4444463	9606.ENSP00000369134	9606.ENSP00000363988	0	0	0	0	0.085	0	0.8	0.387	0.878
HCK	TYROBP	4450141	4435115	9606.ENSP00000444986	9606.ENSP00000262629	0	0	0	0	0.804	0	0	0.403	0.878
TGM2	FN1	4442654	4441661	9606.ENSP00000355330	9606.ENSP00000346839	0	0	0	0	0.123	0.379	0	0.793	0.878
ARNT2	SIM2	4438325	4436863	9606.ENSP00000307479	9606.ENSP00000290399	0	0	0	0.595	0	0.816	0	0.832	0.878
GLDC	ALDH4A1	4445533	4444540	9606.ENSP00000370737	9606.ENSP00000364490	0	0	0	0	0.063	0.085	0.8	0.363	0.876
ANGPT2	FLT1	4438957	4436489	9606.ENSP00000314897	9606.ENSP00000282397	0	0	0	0	0.07	0.051	0.6	0.69	0.876
CAV1	PRKCDBP	4440933	4438313	9606.ENSP00000339191	9606.ENSP00000307292	0	0	0	0	0.229	0.35	0	0.765	0.872
SIM1	ARNT2	4443276	4438325	9606.ENSP00000358210	9606.ENSP00000307479	0	0	0	0.583	0	0.798	0	0.871	0.871
PROC	SERPINE1	4433614	4433266	9606.ENSP00000234071	9606.ENSP00000223095	0	0	0	0	0	0.129	0.8	0.323	0.871
MET	EGF	4439114	4435570	9606.ENSP00000317272	9606.ENSP00000265171	0	0	0	0	0	0.05	0.6	0.689	0.871
PLCG2	PDGFRA	4451677	4434540	9606.ENSP00000482457	9606.ENSP00000257290	0	0	0	0	0	0.374	0.8	0.055	0.871
PLEK	LCP2	4433624	4432628	9606.ENSP00000234313	9606.ENSP00000046794	0	0	0	0	0.765	0	0	0.473	0.871
KCNJ1	CLCNKB	4446057	4444605	9606.ENSP00000376432	9606.ENSP00000364831	0	0	0	0	0.062	0	0	0.868	0.871
MMP9	EGF	4443919	4435570	9606.ENSP00000361405	9606.ENSP00000265171	0	0	0	0	0	0	0	0.871	0.871
VSIG4	CD163	4444445	4442211	9606.ENSP00000363869	9606.ENSP00000352071	0	0	0	0	0.824	0	0	0.294	0.87
NUSAP1	FANCI	4450429	4438638	9606.ENSP00000453403	9606.ENSP00000310842	0	0	0	0	0.834	0	0	0.244	0.869
DTL	TYMS	4442781	4439011	9606.ENSP00000355958	9606.ENSP00000315644	0	0	0	0	0.809	0	0	0.342	0.869
FN1	COL1A1	4441661	4433346	9606.ENSP00000346839	9606.ENSP00000225964	0	0	0	0	0.357	0.379	0	0.698	0.869
CD48	CD53	4451851	4435973	9606.ENSP00000484431	9606.ENSP00000271324	0	0	0	0	0.758	0	0	0.473	0.867
SUCLG1	ACAA1	4446196	4440473	9606.ENSP00000377446	9606.ENSP00000333664	0.123	0	0	0	0.094	0	0.8	0.265	0.867
SLC2A1	HK2	4448824	4436875	9606.ENSP00000416293	9606.ENSP00000290573	0	0	0	0	0.097	0	0	0.858	0.867
MS4A6A	TYROBP	4447767	4435115	9606.ENSP00000392770	9606.ENSP00000262629	0	0	0	0	0.788	0	0	0.398	0.867
FGF1	FLT1	4451524	4436489	9606.ENSP00000480791	9606.ENSP00000282397	0	0	0	0	0.076	0.267	0.6	0.566	0.866
VEGFA	CCL5	4451310	4451102	9606.ENSP00000478570	9606.ENSP00000474412	0	0	0	0	0	0	0	0.865	0.865
PFKP	HK2	4445499	4436875	9606.ENSP00000370517	9606.ENSP00000290573	0	0	0	0	0.093	0.05	0.65	0.604	0.864
HOGA1	DAO	4443592	4433414	9606.ENSP00000359680	9606.ENSP00000228476	0.133	0	0	0	0.118	0	0.8	0.211	0.863
IGFBP3	EGFR	4445494	4436186	9606.ENSP00000370473	9606.ENSP00000275493	0	0	0	0	0.278	0.379	0	0.72	0.863
ERBB2	DCN	4435897	4432629	9606.ENSP00000269571	9606.ENSP00000052754	0	0	0	0	0.061	0.079	0.8	0.292	0.861
NUSAP1	ANLN	4450429	4435644	9606.ENSP00000453403	9606.ENSP00000265748	0	0	0	0	0.811	0	0	0.297	0.861
LAPTM5	TYROBP	4437079	4435115	9606.ENSP00000294507	9606.ENSP00000262629	0	0	0	0	0.795	0	0	0.349	0.861
PTPRC	CSF1R	4448605	4436666	9606.ENSP00000411355	9606.ENSP00000286301	0	0	0	0	0.537	0.094	0	0.693	0.86
SLC22A7	SLC22A8	4443974	4440777	9606.ENSP00000361666	9606.ENSP00000337335	0	0	0.42	0.869	0.085	0.161	0.8	0.865	0.859
NUSAP1	DTL	4450429	4442781	9606.ENSP00000453403	9606.ENSP00000355958	0	0	0	0	0.83	0	0	0.197	0.858
ITGA5	COL1A1	4437011	4433346	9606.ENSP00000293379	9606.ENSP00000225964	0	0	0	0	0.12	0.379	0.6	0.429	0.858
LILRB1	FCGR2A	4439032	4435978	9606.ENSP00000315997	9606.ENSP00000271450	0	0	0	0	0.151	0	0.8	0.23	0.858
G6PC	ALDOC	4434327	4433361	9606.ENSP00000253801	9606.ENSP00000226253	0	0	0	0	0.062	0	0.8	0.301	0.857
FOXI1	SLC26A4	4438038	4435634	9606.ENSP00000304286	9606.ENSP00000265715	0	0	0	0	0	0	0	0.856	0.857
TOP2A	FANCI	4448614	4438638	9606.ENSP00000411532	9606.ENSP00000310842	0	0	0	0	0.812	0	0	0.268	0.856
SLC12A1	WNK4	4446564	4434005	9606.ENSP00000379822	9606.ENSP00000246914	0	0	0	0	0.052	0.182	0	0.829	0.856
PCK1	PCK2	4439313	4432982	9606.ENSP00000319814	9606.ENSP00000216780	0	0	0.449	0.976	0.062	0.277	0.8	0.709	0.856
LY86	C1QB	4445292	4438900	9606.ENSP00000369286	9606.ENSP00000313967	0	0	0	0	0.74	0	0	0.468	0.856
PFKP	PFKFB4	4445499	4433556	9606.ENSP00000370517	9606.ENSP00000232375	0	0	0	0	0.088	0.064	0.65	0.575	0.856
CD48	PTPRC	4451851	4448605	9606.ENSP00000484431	9606.ENSP00000411355	0	0	0	0	0.634	0	0	0.618	0.854
TGFA	EGF	4437149	4435570	9606.ENSP00000295400	9606.ENSP00000265171	0	0	0	0.681	0	0	0.8	0.861	0.854
TOP2A	DTL	4448614	4442781	9606.ENSP00000411532	9606.ENSP00000355958	0	0	0	0	0.826	0	0	0.189	0.853
LCP1	FERMT3	4446831	4436340	9606.ENSP00000381581	9606.ENSP00000279227	0	0	0	0	0.345	0.08	0.72	0.232	0.853
PROM1	EGF	4449376	4435570	9606.ENSP00000426809	9606.ENSP00000265171	0	0	0	0	0.061	0	0	0.848	0.852
ITGAX	FCGR2A	4450468	4435978	9606.ENSP00000454623	9606.ENSP00000271450	0	0	0	0	0.311	0	0	0.794	0.852
NRP2	SEMA6D	4442374	4439723	9606.ENSP00000353582	9606.ENSP00000324857	0	0	0	0	0.065	0.164	0	0.826	0.852
FLT1	EGF	4436489	4435570	9606.ENSP00000282397	9606.ENSP00000265171	0	0	0	0	0	0.062	0.6	0.637	0.852
PDHA1	PCK1	4445276	4439313	9606.ENSP00000369134	9606.ENSP00000319814	0	0	0	0	0	0	0.8	0.294	0.852
TGFBI	FN1	4448825	4441661	9606.ENSP00000416330	9606.ENSP00000346839	0	0	0	0	0.225	0.379	0	0.715	0.851
DTL	FANCI	4442781	4438638	9606.ENSP00000355958	9606.ENSP00000310842	0	0	0	0	0.826	0	0	0.178	0.851
CD163	C1QB	4442211	4438900	9606.ENSP00000352071	9606.ENSP00000313967	0	0	0	0	0.805	0	0	0.263	0.85
C1QB	C3AR1	4438900	4437821	9606.ENSP00000313967	9606.ENSP00000302079	0	0	0	0	0.648	0	0	0.591	0.85
SLC12A1	CLCNKB	4446564	4444605	9606.ENSP00000379822	9606.ENSP00000364831	0	0	0	0	0.064	0.05	0	0.845	0.85
TYMS	TPX2	4439011	4437665	9606.ENSP00000315644	9606.ENSP00000300403	0	0	0	0	0.83	0	0	0.151	0.849
SEMA5B	NRP2	4447616	4442374	9606.ENSP00000389588	9606.ENSP00000353582	0	0	0	0	0	0.164	0	0.826	0.848
PRLR	EGF	4451730	4435570	9606.ENSP00000482954	9606.ENSP00000265171	0	0	0	0	0	0	0.6	0.637	0.848
PGF	CSF1R	4450339	4436666	9606.ENSP00000451040	9606.ENSP00000286301	0	0	0	0	0	0.058	0.6	0.63	0.848
MET	TGFA	4439114	4437149	9606.ENSP00000317272	9606.ENSP00000295400	0	0	0	0	0.076	0	0.6	0.619	0.847
CCL5	ICAM1	4451102	4435501	9606.ENSP00000474412	9606.ENSP00000264832	0	0	0	0	0.08	0	0	0.84	0.847
PDHA1	PCK2	4445276	4432982	9606.ENSP00000369134	9606.ENSP00000216780	0	0	0	0	0	0	0.8	0.27	0.847
TCF21	WT1	4442979	4440250	9606.ENSP00000356857	9606.ENSP00000331327	0	0	0	0	0.064	0.053	0	0.84	0.846
SLC12A1	SLC9A3	4446564	4435520	9606.ENSP00000379822	9606.ENSP00000264938	0	0	0	0	0.063	0.064	0	0.837	0.845
ALOX5	LOX	4444382	4433517	9606.ENSP00000363512	9606.ENSP00000231004	0	0	0	0	0.061	0	0	0.842	0.845
PTPRC	CD86	4448605	4440320	9606.ENSP00000411355	9606.ENSP00000332049	0	0	0	0	0.37	0	0	0.763	0.845
FYB	NCK1	4449385	4448885	9606.ENSP00000427114	9606.ENSP00000417273	0	0	0	0	0	0.342	0	0.772	0.844
EGF	CCND1	4435570	4433391	9606.ENSP00000265171	9606.ENSP00000227507	0	0	0	0	0	0	0	0.844	0.844
VSIG4	C1QC	4444445	4444427	9606.ENSP00000363869	9606.ENSP00000363770	0	0	0	0	0.797	0	0	0.265	0.844
ITGA4	ICAM1	4446627	4435501	9606.ENSP00000380227	9606.ENSP00000264832	0	0	0	0	0.062	0.17	0	0.815	0.843
PLCG2	MET	4451677	4439114	9606.ENSP00000482457	9606.ENSP00000317272	0	0	0	0	0	0.249	0.8	0	0.843
VEGFA	FGFR2	4451310	4448546	9606.ENSP00000478570	9606.ENSP00000410294	0	0	0	0	0.062	0.174	0.6	0.556	0.843
RHBG	SLC9A3	4449979	4435520	9606.ENSP00000441197	9606.ENSP00000264938	0	0	0	0	0.052	0.367	0	0.758	0.842
FERMT3	FERMT1	4436340	4433012	9606.ENSP00000279227	9606.ENSP00000217289	0	0	0	0.954	0	0.835	0	0.83	0.841
ITGB2	CTSS	4446737	4443237	9606.ENSP00000380948	9606.ENSP00000357981	0	0	0	0	0.747	0	0	0.399	0.841
ACOT11	LIX1	4443721	4436132	9606.ENSP00000360366	9606.ENSP00000274382	0	0	0	0	0.841	0	0	0	0.841
ITGB2	PLEK	4446737	4433624	9606.ENSP00000380948	9606.ENSP00000234313	0	0	0	0	0.795	0	0	0.255	0.84
C1QC	CSF1R	4444427	4436666	9606.ENSP00000363770	9606.ENSP00000286301	0	0	0	0	0.819	0	0	0.153	0.84
PTPRC	FCGR2A	4448605	4435978	9606.ENSP00000411355	9606.ENSP00000271450	0	0	0	0	0.259	0	0	0.792	0.839
CASP1	IFI16	4449658	4443043	9606.ENSP00000433138	9606.ENSP00000357113	0	0	0	0	0.299	0.342	0	0.678	0.838
ERBB4	DCN	4441238	4432629	9606.ENSP00000342235	9606.ENSP00000052754	0	0	0	0	0	0.079	0.8	0.196	0.838
PLCG2	ICAM1	4451677	4435501	9606.ENSP00000482457	9606.ENSP00000264832	0	0	0	0	0	0	0.8	0.222	0.837
SLC26A4	ATP6V1B1	4435634	4433629	9606.ENSP00000265715	9606.ENSP00000234396	0	0	0	0	0.064	0	0	0.833	0.837
SLC12A1	AQP2	4446564	4432767	9606.ENSP00000379822	9606.ENSP00000199280	0	0	0	0	0.062	0	0	0.833	0.837
ESRRG	PPARGC1A	4442769	4435507	9606.ENSP00000355904	9606.ENSP00000264867	0	0	0	0	0.088	0.642	0	0.539	0.836
NR3C2	HSD11B2	4442077	4439082	9606.ENSP00000350815	9606.ENSP00000316786	0	0	0	0	0	0.05	0	0.834	0.836
DTL	TPX2	4442781	4437665	9606.ENSP00000355958	9606.ENSP00000300403	0	0	0	0	0.82	0	0	0.126	0.836
TYROBP	TLR2	4435115	4434743	9606.ENSP00000262629	9606.ENSP00000260010	0	0	0	0	0.69	0	0	0.49	0.835
KRT7	NAPSA	4440087	4434319	9606.ENSP00000329243	9606.ENSP00000253719	0	0	0	0	0.061	0	0	0.832	0.835
PROM1	EPCAM	4449376	4435308	9606.ENSP00000426809	9606.ENSP00000263735	0	0	0	0	0.098	0	0	0.825	0.835
MAPK10	DUSP9	4442217	4441564	9606.ENSP00000352157	9606.ENSP00000345853	0	0	0	0	0	0.483	0.6	0.264	0.834
ALDH6A1	ACADSB	4450308	4443211	9606.ENSP00000450436	9606.ENSP00000357873	0	0	0	0	0.703	0	0	0.465	0.834
C1QA	C3AR1	4444428	4437821	9606.ENSP00000363773	9606.ENSP00000302079	0	0	0	0	0.626	0	0	0.572	0.833
MT1G	MT1X	4447689	4446278	9606.ENSP00000391397	9606.ENSP00000377995	0	0	0	0.97	0.83	0	0	0.669	0.833
PFKP	PFKFB2	4445499	4442802	9606.ENSP00000370517	9606.ENSP00000356047	0	0	0	0	0.088	0.064	0.65	0.508	0.833
MYOF	EHD2	4442225	4435232	9606.ENSP00000352208	9606.ENSP00000263277	0	0	0	0	0.17	0.299	0	0.736	0.833
SUCLG1	HMGCS2	4446196	4443311	9606.ENSP00000377446	9606.ENSP00000358414	0	0	0	0	0.064	0	0.8	0.18	0.833
MYO1F	TYROBP	4441469	4435115	9606.ENSP00000344871	9606.ENSP00000262629	0	0	0	0	0.747	0	0	0.362	0.832
ATP6V1B1	ATP12A	4433629	4433055	9606.ENSP00000234396	9606.ENSP00000218548	0	0	0	0	0.097	0.123	0	0.805	0.832
MT1X	MT1H	4446278	4440195	9606.ENSP00000377995	9606.ENSP00000330587	0	0	0	0.973	0.829	0	0	0.63	0.831
VEGFA	SLC2A1	4451310	4448824	9606.ENSP00000478570	9606.ENSP00000416293	0	0	0	0	0.061	0	0	0.827	0.831
MT1H	MT1E	4440195	4438349	9606.ENSP00000330587	9606.ENSP00000307706	0	0	0	0.975	0.829	0	0	0.57	0.831
EVI2B	CD53	4440484	4435973	9606.ENSP00000333779	9606.ENSP00000271324	0	0	0	0	0.77	0	0	0.292	0.83
MT1X	MT1E	4446278	4438349	9606.ENSP00000377995	9606.ENSP00000307706	0	0	0	0.973	0.828	0	0	0.59	0.83
FYB	PTPRC	4449385	4448605	9606.ENSP00000427114	9606.ENSP00000411355	0	0	0	0	0.775	0	0	0.27	0.828
NPHS2	WT1	4442926	4440250	9606.ENSP00000356587	9606.ENSP00000331327	0	0	0	0	0.061	0.05	0	0.823	0.828
MMP9	EGFR	4443919	4436186	9606.ENSP00000361405	9606.ENSP00000275493	0	0	0	0	0	0	0	0.828	0.828
CD163	TYROBP	4442211	4435115	9606.ENSP00000352071	9606.ENSP00000262629	0	0	0	0	0.786	0	0	0.222	0.827
ANGPT2	ERBB2	4438957	4435897	9606.ENSP00000314897	9606.ENSP00000269571	0	0	0	0	0.049	0	0.6	0.582	0.827
CXCR4	KIT	4447439	4436763	9606.ENSP00000386884	9606.ENSP00000288135	0	0	0	0	0	0.05	0	0.825	0.827
TLR2	DCN	4434743	4432629	9606.ENSP00000260010	9606.ENSP00000052754	0	0	0	0.593	0	0	0.8	0.349	0.826
C1QA	CD163	4444428	4442211	9606.ENSP00000363773	9606.ENSP00000352071	0	0	0	0	0.785	0	0	0.224	0.826
RAPGEF3	MAPK10	4447902	4442217	9606.ENSP00000395708	9606.ENSP00000352157	0	0	0	0	0.085	0	0.8	0.126	0.826
MS4A6A	CD163	4447767	4442211	9606.ENSP00000392770	9606.ENSP00000352071	0	0	0	0	0.812	0	0	0.115	0.826
ENO2	ALDOB	4449816	4444463	9606.ENSP00000437402	9606.ENSP00000363988	0	0	0	0	0.228	0.053	0.6	0.469	0.824
HK2	PFKFB4	4436875	4433556	9606.ENSP00000290573	9606.ENSP00000232375	0	0	0	0	0.119	0	0.65	0.476	0.824
ITGB2	CSF1R	4446737	4436666	9606.ENSP00000380948	9606.ENSP00000286301	0	0	0	0	0.77	0.085	0	0.225	0.823
KL	MIOX	4445327	4432906	9606.ENSP00000369442	9606.ENSP00000216075	0	0	0	0	0.062	0	0.8	0.13	0.822
PTPRC	CD53	4448605	4435973	9606.ENSP00000411355	9606.ENSP00000271324	0	0	0	0	0.708	0.084	0	0.389	0.822
CALB1	TRPV5	4435604	4435580	9606.ENSP00000265431	9606.ENSP00000265310	0	0	0	0	0.062	0.541	0	0.618	0.821
LOX	COL1A1	4433517	4433346	9606.ENSP00000231004	9606.ENSP00000225964	0	0	0	0	0.408	0.305	0	0.597	0.82
FGF1	KIT	4451524	4436763	9606.ENSP00000480791	9606.ENSP00000288135	0	0	0	0	0	0.267	0.6	0.436	0.82
CASP1	TLR2	4449658	4434743	9606.ENSP00000433138	9606.ENSP00000260010	0	0	0	0	0.268	0.08	0	0.754	0.82
PFKFB2	HK2	4442802	4436875	9606.ENSP00000356047	9606.ENSP00000290573	0	0	0	0	0.064	0	0.65	0.493	0.819
ITGB2	LCP2	4446737	4432628	9606.ENSP00000380948	9606.ENSP00000046794	0	0	0	0	0.744	0	0	0.323	0.819
APOC1	PLA2G7	4450772	4436162	9606.ENSP00000465356	9606.ENSP00000274793	0	0	0	0	0.077	0	0.72	0.359	0.819
FGF9	FLT1	4445677	4436489	9606.ENSP00000371790	9606.ENSP00000282397	0	0	0	0	0	0.267	0.6	0.433	0.819
FN1	ICAM1	4441661	4435501	9606.ENSP00000346839	9606.ENSP00000264832	0	0	0	0	0.063	0	0	0.814	0.819
FGFR2	EGF	4448546	4435570	9606.ENSP00000410294	9606.ENSP00000265171	0	0	0	0	0	0.062	0.6	0.554	0.818
PPP1R3B	PPP1R3C	4438400	4433728	9606.ENSP00000308318	9606.ENSP00000238994	0	0	0	0.903	0.061	0	0.8	0.757	0.818
C1orf162	TYROBP	4441401	4435115	9606.ENSP00000344218	9606.ENSP00000262629	0	0	0	0	0.817	0	0	0	0.817
HSPA2	TLR2	4446310	4434743	9606.ENSP00000378199	9606.ENSP00000260010	0	0	0	0	0	0.05	0.8	0.114	0.817
MMP9	PLAT	4443919	4433132	9606.ENSP00000361405	9606.ENSP00000220809	0	0	0	0	0	0	0	0.817	0.817
NR1I3	CYP2B6	4442999	4439703	9606.ENSP00000356959	9606.ENSP00000324648	0	0	0	0	0.075	0.085	0	0.801	0.817
ENPP3	ENPP1	4448408	4442442	9606.ENSP00000406261	9606.ENSP00000354238	0	0	0.44	0.949	0.062	0	0.8	0.731	0.815
GGT6	ALDH4A1	4445563	4444540	9606.ENSP00000370962	9606.ENSP00000364490	0	0	0	0	0.062	0	0.8	0.097	0.815
IGSF6	TYROBP	4435822	4435115	9606.ENSP00000268389	9606.ENSP00000262629	0	0	0	0	0.795	0	0	0.125	0.813
CAV1	ERBB2	4440933	4435897	9606.ENSP00000339191	9606.ENSP00000269571	0	0	0	0	0.06	0.379	0	0.705	0.813
FANCI	TPX2	4438638	4437665	9606.ENSP00000310842	9606.ENSP00000300403	0	0	0	0	0.803	0	0	0.086	0.813
SLC12A3	CLCNKB	4448218	4444605	9606.ENSP00000402152	9606.ENSP00000364831	0	0	0	0	0	0.05	0	0.809	0.81
PTPRC	EPCAM	4448605	4435308	9606.ENSP00000411355	9606.ENSP00000263735	0	0	0	0	0	0	0	0.81	0.81
ATP6V0A4	EGFR	4438387	4436186	9606.ENSP00000308122	9606.ENSP00000275493	0	0	0	0	0.06	0	0.8	0.071	0.81
MUC1	MET	4451890	4439114	9606.ENSP00000484824	9606.ENSP00000317272	0	0	0	0	0.069	0.379	0	0.697	0.809
SCD	SCD5	4443512	4439049	9606.ENSP00000359380	9606.ENSP00000316329	0	0	0.447	0.96	0	0	0.8	0.763	0.809
FOXI1	ATP6V1B1	4438038	4433629	9606.ENSP00000304286	9606.ENSP00000234396	0	0	0	0	0.091	0	0	0.798	0.809
ANO5	NELL1	4438989	4437528	9606.ENSP00000315371	9606.ENSP00000298925	0	0	0	0	0.08	0	0	0.8	0.808
ACAA1	ACOX2	4440473	4438346	9606.ENSP00000333664	9606.ENSP00000307697	0.055	0	0	0	0.371	0	0	0.703	0.808
PPAPDC1A	GPD1L	4446797	4436498	9606.ENSP00000381302	9606.ENSP00000282541	0	0	0	0	0	0	0.8	0.08	0.808
TPX2	ATAD2	4437665	4436722	9606.ENSP00000300403	9606.ENSP00000287394	0	0	0	0	0.784	0	0	0.148	0.808
ALB	ICAM1	4437206	4435501	9606.ENSP00000295897	9606.ENSP00000264832	0	0	0	0	0	0	0	0.806	0.807
SLC12A3	KCNJ1	4448218	4446057	9606.ENSP00000402152	9606.ENSP00000376432	0	0	0	0	0.062	0	0	0.803	0.807
ALDOB	ALDOC	4444463	4433361	9606.ENSP00000363988	9606.ENSP00000226253	0	0	0.449	0.974	0	0	0.8	0.8	0.806
ATP6V0D2	ATP12A	4436630	4433055	9606.ENSP00000285393	9606.ENSP00000218548	0	0	0	0	0.061	0.127	0	0.783	0.806
VSIG4	CSF1R	4444445	4436666	9606.ENSP00000363869	9606.ENSP00000286301	0	0	0	0	0.783	0	0	0.141	0.806
MAPK10	MECOM	4442217	4435476	9606.ENSP00000352157	9606.ENSP00000264674	0	0	0	0	0	0.071	0.8	0	0.806
ANK2	GABARAPL1	4441946	4435700	9606.ENSP00000349588	9606.ENSP00000266458	0	0	0	0	0.062	0.798	0	0.06	0.806
CTSS	LAPTM5	4443237	4437079	9606.ENSP00000357981	9606.ENSP00000294507	0	0	0	0	0.689	0	0	0.399	0.805
ASPDH	ASS1	4445836	4443929	9606.ENSP00000373860	9606.ENSP00000361471	0	0	0	0	0.064	0	0.8	0	0.804
CSF1R	EGF	4436666	4435570	9606.ENSP00000286301	9606.ENSP00000265171	0	0	0	0	0.061	0.062	0.6	0.51	0.804
VEGFA	ERBB4	4451310	4441238	9606.ENSP00000478570	9606.ENSP00000342235	0	0	0	0	0	0	0.6	0.531	0.804
LAPTM5	PLEK	4437079	4433624	9606.ENSP00000294507	9606.ENSP00000234313	0	0	0	0	0.776	0	0	0.154	0.803
PROM1	PTPRC	4449376	4448605	9606.ENSP00000426809	9606.ENSP00000411355	0	0	0	0	0	0	0	0.802	0.802
C1QC	CTSS	4444427	4443237	9606.ENSP00000363770	9606.ENSP00000357981	0	0	0	0	0.676	0	0	0.412	0.801
CCL5	MMP9	4451102	4443919	9606.ENSP00000474412	9606.ENSP00000361405	0	0	0	0	0.076	0	0	0.792	0.801
ITGB2	DOCK2	4446737	4434518	9606.ENSP00000380948	9606.ENSP00000256935	0	0	0	0	0.701	0	0	0.358	0.8
MMP9	TLR2	4443919	4434743	9606.ENSP00000361405	9606.ENSP00000260010	0	0	0	0	0.165	0	0	0.769	0.799
PTPRC	ALB	4448605	4437206	9606.ENSP00000411355	9606.ENSP00000295897	0	0	0	0	0	0	0	0.799	0.799
CD86	ICAM1	4440320	4435501	9606.ENSP00000332049	9606.ENSP00000264832	0	0	0	0	0.09	0	0	0.789	0.799
PSAT1	CTH	4444751	4443637	9606.ENSP00000365773	9606.ENSP00000359976	0.123	0	0	0	0.134	0.325	0	0.652	0.797
NPHS1	ALB	4445133	4437206	9606.ENSP00000368190	9606.ENSP00000295897	0	0	0	0	0	0.043	0	0.797	0.797
ITGA4	ITGA5	4446627	4437011	9606.ENSP00000380227	9606.ENSP00000293379	0	0	0	0.674	0.076	0	0.72	0.771	0.797
CTSS	TYROBP	4443237	4435115	9606.ENSP00000357981	9606.ENSP00000262629	0	0	0	0	0.723	0	0	0.293	0.796
FGF9	EGFR	4445677	4436186	9606.ENSP00000371790	9606.ENSP00000275493	0	0	0	0	0.052	0	0.6	0.503	0.795
DOCK2	LCP2	4434518	4432628	9606.ENSP00000256935	9606.ENSP00000046794	0	0	0	0	0.678	0	0	0.389	0.794
ITGB2	C1QA	4446737	4444428	9606.ENSP00000380948	9606.ENSP00000363773	0	0	0	0	0.652	0	0	0.43	0.793
FGF1	VEGFA	4451524	4451310	9606.ENSP00000480791	9606.ENSP00000478570	0	0	0	0	0.061	0	0	0.789	0.793
ABCA8	SLC22A8	4450845	4440777	9606.ENSP00000467271	9606.ENSP00000337335	0	0	0	0	0.055	0.158	0	0.759	0.792
ITGAX	CSF1R	4450468	4436666	9606.ENSP00000454623	9606.ENSP00000286301	0	0	0	0	0.23	0	0	0.739	0.791
PTPRC	PLEK	4448605	4433624	9606.ENSP00000411355	9606.ENSP00000234313	0	0	0	0	0.746	0	0	0.21	0.791
FYB	PLEK	4449385	4433624	9606.ENSP00000427114	9606.ENSP00000234313	0	0	0	0	0.701	0	0	0.327	0.79
SCIN	C3	4437359	4433951	9606.ENSP00000297029	9606.ENSP00000245907	0	0	0	0	0.062	0	0	0.784	0.789
FGF1	PDGFRA	4451524	4434540	9606.ENSP00000480791	9606.ENSP00000257290	0	0	0	0	0.097	0.267	0.6	0.298	0.789
SUCLG1	PDHA1	4446196	4445276	9606.ENSP00000377446	9606.ENSP00000369134	0	0	0	0	0.479	0.063	0	0.603	0.789
PGF	KIT	4450339	4436763	9606.ENSP00000451040	9606.ENSP00000288135	0	0	0	0	0	0.058	0.6	0.481	0.787
NCK1	ERBB4	4448885	4441238	9606.ENSP00000417273	9606.ENSP00000342235	0	0	0	0	0	0.757	0	0.161	0.787
TRPM6	TRPV5	4442420	4435580	9606.ENSP00000354006	9606.ENSP00000265310	0	0	0	0	0.061	0	0	0.783	0.787
ATP6V0A4	ATP12A	4438387	4433055	9606.ENSP00000308122	9606.ENSP00000218548	0	0	0	0	0.062	0.108	0	0.765	0.787
MT1X	MT1F	4446278	4440608	9606.ENSP00000377995	9606.ENSP00000334872	0	0	0	0.969	0.782	0	0	0.647	0.786
TLR7	CD86	4445433	4440320	9606.ENSP00000370034	9606.ENSP00000332049	0	0	0	0	0.292	0	0	0.71	0.786
SLC12A3	KLHL3	4448218	4438782	9606.ENSP00000402152	9606.ENSP00000312397	0	0	0	0	0	0.379	0	0.67	0.786
CD86	FCGR2A	4440320	4435978	9606.ENSP00000332049	9606.ENSP00000271450	0	0	0	0	0.265	0	0	0.721	0.786
COL4A1	FN1	4444632	4441661	9606.ENSP00000364979	9606.ENSP00000346839	0	0	0	0	0.346	0.313	0	0.561	0.785
PTPRC	TLR7	4448605	4445433	9606.ENSP00000411355	9606.ENSP00000370034	0	0	0	0	0.533	0.063	0	0.549	0.785
ITGAX	ITGA4	4450468	4446627	9606.ENSP00000454623	9606.ENSP00000380227	0	0	0	0.627	0.061	0	0.72	0.603	0.785
CCL18	CXCR4	4451437	4447439	9606.ENSP00000479955	9606.ENSP00000386884	0	0	0	0	0.074	0.124	0.6	0.415	0.785
PIK3CG	KIT	4442215	4436763	9606.ENSP00000352121	9606.ENSP00000288135	0	0	0	0	0	0.719	0	0.267	0.785
TOP2A	EZH2	4448614	4439336	9606.ENSP00000411532	9606.ENSP00000320147	0	0	0	0	0.702	0	0	0.309	0.785
VSIG4	C3AR1	4444445	4437821	9606.ENSP00000363869	9606.ENSP00000302079	0	0	0	0	0.536	0	0	0.555	0.785
PFKP	PYGL	4445499	4432954	9606.ENSP00000370517	9606.ENSP00000216392	0.08	0	0	0	0.485	0.406	0	0.323	0.784
VEGFA	CCND1	4451310	4433391	9606.ENSP00000478570	9606.ENSP00000227507	0	0	0	0	0.069	0.17	0	0.743	0.784
CD163	TLR2	4442211	4434743	9606.ENSP00000352071	9606.ENSP00000260010	0	0	0	0	0.56	0	0	0.531	0.784
PROM1	KIT	4449376	4436763	9606.ENSP00000426809	9606.ENSP00000288135	0	0	0	0	0.087	0	0	0.773	0.784
MT1G	MT1E	4447689	4438349	9606.ENSP00000391397	9606.ENSP00000307706	0	0	0	0.975	0.781	0	0	0.63	0.784
WT1	KIT	4440250	4436763	9606.ENSP00000331327	9606.ENSP00000288135	0	0	0	0	0	0.061	0	0.779	0.784
MT1G	MT1F	4447689	4440608	9606.ENSP00000391397	9606.ENSP00000334872	0	0	0	0.976	0.779	0	0	0.752	0.782
DTL	ATAD2	4442781	4436722	9606.ENSP00000355958	9606.ENSP00000287394	0	0	0	0	0.782	0	0	0	0.782
SEZ6L2	DOC2A	4451623	4441015	9606.ENSP00000481917	9606.ENSP00000340017	0	0	0	0	0.106	0	0	0.766	0.782
MMP9	ERBB2	4443919	4435897	9606.ENSP00000361405	9606.ENSP00000269571	0	0	0	0	0	0	0	0.78	0.781
TYROBP	PLEK	4435115	4433624	9606.ENSP00000262629	9606.ENSP00000234313	0	0	0	0	0.752	0	0	0.151	0.781
SLC12A1	SCNN1G	4446564	4437627	9606.ENSP00000379822	9606.ENSP00000300061	0	0	0	0	0.081	0	0	0.772	0.781
VEGFA	CAV1	4451310	4440933	9606.ENSP00000478570	9606.ENSP00000339191	0	0	0	0	0.076	0	0	0.772	0.78
FCGR2A	TYROBP	4435978	4435115	9606.ENSP00000271450	9606.ENSP00000262629	0	0	0	0	0.694	0	0	0.311	0.78
PGF	EGFR	4450339	4436186	9606.ENSP00000451040	9606.ENSP00000275493	0	0	0	0	0	0	0.6	0.473	0.78
CXCR4	MMP9	4447439	4443919	9606.ENSP00000386884	9606.ENSP00000361405	0	0	0	0	0.076	0.064	0	0.766	0.78
FGF9	KIT	4445677	4436763	9606.ENSP00000371790	9606.ENSP00000288135	0	0	0	0	0	0.267	0.6	0.307	0.779
TREM2	CSF1R	4444111	4436666	9606.ENSP00000362205	9606.ENSP00000286301	0	0	0	0	0.508	0	0	0.57	0.779
EGF	EPCAM	4435570	4435308	9606.ENSP00000265171	9606.ENSP00000263735	0	0	0	0	0	0	0	0.778	0.778
FGF1	CSF1R	4451524	4436666	9606.ENSP00000480791	9606.ENSP00000286301	0	0	0	0	0	0.267	0.6	0.306	0.778
EVI2B	LAPTM5	4440484	4437079	9606.ENSP00000333779	9606.ENSP00000294507	0	0	0	0	0.661	0	0	0.367	0.777
TRPM3	TRPA1	4444830	4435031	9606.ENSP00000366314	9606.ENSP00000262209	0	0	0	0	0	0	0	0.777	0.777
LY86	C1QA	4445292	4444428	9606.ENSP00000369286	9606.ENSP00000363773	0	0	0	0	0.624	0	0	0.431	0.777
C1QB	LAPTM5	4438900	4437079	9606.ENSP00000313967	9606.ENSP00000294507	0	0	0	0	0.62	0	0	0.437	0.777
FGF9	PDGFRA	4445677	4434540	9606.ENSP00000371790	9606.ENSP00000257290	0	0	0	0	0	0.267	0.6	0.299	0.776
CXCR4	EGF	4447439	4435570	9606.ENSP00000386884	9606.ENSP00000265171	0	0	0	0	0	0.062	0	0.77	0.776
MET	CCND1	4439114	4433391	9606.ENSP00000317272	9606.ENSP00000227507	0	0	0	0	0.139	0	0	0.749	0.776
NUSAP1	CDCA2	4450429	4439997	9606.ENSP00000453403	9606.ENSP00000328228	0	0	0	0	0.705	0	0	0.27	0.775
TLR3	LY96	4437339	4436604	9606.ENSP00000296795	9606.ENSP00000284818	0	0	0	0	0	0.351	0	0.669	0.775
CASP1	P2RX7	4449658	4440203	9606.ENSP00000433138	9606.ENSP00000330696	0	0	0	0	0.078	0	0	0.766	0.775
PTPRC	DOCK2	4448605	4434518	9606.ENSP00000411355	9606.ENSP00000256935	0	0	0	0	0.732	0	0	0.195	0.775
NR1I3	NR0B2	4442999	4434348	9606.ENSP00000356959	9606.ENSP00000254227	0	0	0	0	0.064	0.404	0	0.63	0.775
MTHFD2	GLDC	4446222	4445533	9606.ENSP00000377617	9606.ENSP00000370737	0.219	0	0	0	0.208	0	0	0.665	0.774
DDC	SLC6A3	4448281	4435941	9606.ENSP00000403644	9606.ENSP00000270349	0	0	0	0	0.061	0	0	0.77	0.774
PLCG2	PIK3CG	4451677	4442215	9606.ENSP00000482457	9606.ENSP00000352121	0	0	0	0	0.064	0.185	0.65	0.252	0.773
SUCLG1	OGDHL	4446196	4444320	9606.ENSP00000377446	9606.ENSP00000363216	0.185	0	0	0	0.412	0	0	0.564	0.773
PTPRC	EVI2B	4448605	4440484	9606.ENSP00000411355	9606.ENSP00000333779	0	0	0	0	0.745	0	0	0.145	0.773
HCK	PLEK	4450141	4433624	9606.ENSP00000444986	9606.ENSP00000234313	0	0	0	0	0.685	0	0	0.31	0.773
MS4A6A	C1orf162	4447767	4441401	9606.ENSP00000392770	9606.ENSP00000344218	0	0	0	0	0.772	0	0	0	0.772
DPP6	DNER	4444940	4441501	9606.ENSP00000367001	9606.ENSP00000345229	0	0	0	0	0.152	0	0	0.741	0.771
FYB	ITGB2	4449385	4446737	9606.ENSP00000427114	9606.ENSP00000380948	0	0	0	0	0.688	0	0	0.298	0.771
CXCR4	EGFR	4447439	4436186	9606.ENSP00000386884	9606.ENSP00000275493	0	0	0	0	0	0.084	0	0.759	0.771
CSF1R	IGSF6	4436666	4435822	9606.ENSP00000286301	9606.ENSP00000268389	0	0	0	0	0.742	0	0	0.149	0.771
CD48	CD84	4451851	4438778	9606.ENSP00000484431	9606.ENSP00000312367	0	0	0	0	0.269	0	0	0.7	0.771
WDR72	ENAM	4446532	4446500	9606.ENSP00000379619	9606.ENSP00000379383	0	0	0	0	0	0	0	0.77	0.77
ENO2	PFKP	4449816	4445499	9606.ENSP00000437402	9606.ENSP00000370517	0.081	0	0	0	0.449	0	0	0.581	0.77
LY86	TYROBP	4445292	4435115	9606.ENSP00000369286	9606.ENSP00000262629	0	0	0	0	0.643	0	0	0.382	0.77
CTSS	CSF1R	4443237	4436666	9606.ENSP00000357981	9606.ENSP00000286301	0	0	0	0	0.719	0	0	0.21	0.769
FBP1	PFKFB2	4448472	4442802	9606.ENSP00000408025	9606.ENSP00000356047	0	0	0	0	0.08	0	0.65	0.342	0.769
ITGAX	TLR2	4450468	4434743	9606.ENSP00000454623	9606.ENSP00000260010	0	0	0	0	0.23	0.055	0	0.708	0.769
VEGFA	ADM	4451310	4449788	9606.ENSP00000478570	9606.ENSP00000436607	0	0	0	0	0.077	0	0	0.76	0.769
MT1F	MT1H	4440608	4440195	9606.ENSP00000334872	9606.ENSP00000330587	0	0	0	0.973	0.766	0	0	0.583	0.769
PTPRC	FN1	4448605	4441661	9606.ENSP00000411355	9606.ENSP00000346839	0	0	0	0	0.062	0.29	0	0.68	0.768
C1QB	FCER1G	4438900	4436828	9606.ENSP00000313967	9606.ENSP00000289902	0	0	0	0	0.647	0	0	0.372	0.768
NUSAP1	ATAD2	4450429	4436722	9606.ENSP00000453403	9606.ENSP00000287394	0	0	0	0	0.768	0	0	0	0.768
PDZD3	SLC34A1	4441755	4439443	9606.ENSP00000347742	9606.ENSP00000321424	0	0	0	0	0.083	0.183	0	0.716	0.768
ITGA5	LAMA4	4437011	4433505	9606.ENSP00000293379	9606.ENSP00000230538	0	0	0	0	0.084	0.157	0.6	0.338	0.768
ALB	EGFR	4437206	4436186	9606.ENSP00000295897	9606.ENSP00000275493	0	0	0	0	0.061	0	0	0.762	0.767
VEGFA	IGFBP3	4451310	4445494	9606.ENSP00000478570	9606.ENSP00000370473	0	0	0	0	0.091	0	0	0.754	0.767
HK2	ALDOC	4436875	4433361	9606.ENSP00000290573	9606.ENSP00000226253	0	0	0	0	0.063	0	0.6	0.427	0.766
APBB1IP	FERMT3	4444696	4436340	9606.ENSP00000365411	9606.ENSP00000279227	0	0	0	0	0.323	0	0	0.669	0.766
C1QA	CTSS	4444428	4443237	9606.ENSP00000363773	9606.ENSP00000357981	0	0	0	0	0.632	0	0	0.39	0.766
PTPRC	ITGA4	4448605	4446627	9606.ENSP00000411355	9606.ENSP00000380227	0	0	0	0	0.198	0.165	0	0.678	0.766
ALDOB	HK2	4444463	4436875	9606.ENSP00000363988	9606.ENSP00000290573	0	0	0	0	0.063	0	0.6	0.426	0.766
MMP9	CCND1	4443919	4433391	9606.ENSP00000361405	9606.ENSP00000227507	0	0	0	0	0	0	0	0.765	0.765
VEGFA	PTHLH	4451310	4450000	9606.ENSP00000478570	9606.ENSP00000441765	0	0	0	0	0	0	0	0.765	0.765
TLR7	LY96	4445433	4436604	9606.ENSP00000370034	9606.ENSP00000284818	0	0	0	0	0.096	0.351	0	0.633	0.765
GMFG	LAPTM5	4451021	4437079	9606.ENSP00000472249	9606.ENSP00000294507	0	0	0	0	0.68	0	0	0.294	0.765
ITGB2	C1QB	4446737	4438900	9606.ENSP00000380948	9606.ENSP00000313967	0	0	0	0	0.653	0	0	0.35	0.765
ITGAX	ITGA5	4450468	4437011	9606.ENSP00000454623	9606.ENSP00000293379	0	0	0	0.586	0.06	0	0.72	0.377	0.765
PNMA2	DNER	4449500	4441501	9606.ENSP00000429344	9606.ENSP00000345229	0	0	0	0	0.17	0	0	0.727	0.764
CYP2B6	GSTM3	4439703	4434500	9606.ENSP00000324648	9606.ENSP00000256594	0	0	0	0	0	0.077	0.65	0.324	0.762
CASP1	CD86	4449658	4440320	9606.ENSP00000433138	9606.ENSP00000332049	0	0	0	0	0.297	0	0	0.675	0.762
PPARGC1A	NR0B2	4435507	4434348	9606.ENSP00000264867	9606.ENSP00000254227	0	0	0	0	0	0.37	0	0.638	0.762
LY86	CTSS	4445292	4443237	9606.ENSP00000369286	9606.ENSP00000357981	0	0	0	0	0.655	0	0	0.332	0.76
CASP1	SERPINA5	4449658	4440432	9606.ENSP00000433138	9606.ENSP00000333203	0	0	0	0	0	0	0.72	0.18	0.76
CSF1R	SCARB1	4436666	4434927	9606.ENSP00000286301	9606.ENSP00000261693	0	0	0	0	0.063	0	0	0.754	0.76
GMFG	CD53	4451021	4435973	9606.ENSP00000472249	9606.ENSP00000271324	0	0	0	0	0.708	0	0	0.212	0.76
FYB	APBB1IP	4449385	4444696	9606.ENSP00000427114	9606.ENSP00000365411	0	0	0	0	0.352	0	0	0.644	0.759
VEGFA	DCN	4451310	4432629	9606.ENSP00000478570	9606.ENSP00000052754	0	0	0	0	0.061	0	0	0.754	0.759
FN1	PLAT	4441661	4433132	9606.ENSP00000346839	9606.ENSP00000220809	0	0	0	0	0.177	0.294	0	0.618	0.758
PDZD3	SLC9A3	4441755	4435520	9606.ENSP00000347742	9606.ENSP00000264938	0	0	0	0	0.076	0	0	0.748	0.758
ITGB2	FERMT3	4446737	4436340	9606.ENSP00000380948	9606.ENSP00000279227	0	0	0	0	0.415	0.111	0	0.572	0.758
COL4A1	ITGA5	4444632	4437011	9606.ENSP00000364979	9606.ENSP00000293379	0	0	0	0	0.153	0	0.6	0.345	0.758
MUC1	KRT7	4451890	4440087	9606.ENSP00000484824	9606.ENSP00000329243	0	0	0	0	0.201	0	0	0.709	0.757
EZH2	CCND1	4439336	4433391	9606.ENSP00000320147	9606.ENSP00000227507	0	0	0	0	0.062	0	0	0.751	0.757
CD53	LCP2	4435973	4432628	9606.ENSP00000271324	9606.ENSP00000046794	0	0	0	0	0.706	0	0	0.207	0.757
CD300A	TYROBP	4442338	4435115	9606.ENSP00000353259	9606.ENSP00000262629	0	0	0	0	0.534	0.087	0	0.473	0.756
UMOD	AQP2	4446508	4432767	9606.ENSP00000379438	9606.ENSP00000199280	0	0	0	0	0.224	0	0	0.699	0.756
CD53	PLEK	4435973	4433624	9606.ENSP00000271324	9606.ENSP00000234313	0	0	0	0	0.729	0	0	0.138	0.756
LCP1	ITGB2	4446831	4446737	9606.ENSP00000381581	9606.ENSP00000380948	0	0	0	0	0.613	0.26	0	0.209	0.754
ABCB1	EGFR	4451279	4436186	9606.ENSP00000478255	9606.ENSP00000275493	0	0	0	0	0.062	0	0	0.748	0.754
NEDD4L	EGFR	4446996	4436186	9606.ENSP00000383199	9606.ENSP00000275493	0	0	0	0	0.066	0.076	0.6	0.372	0.754
FGFR2	TOX3	4448546	4433101	9606.ENSP00000410294	9606.ENSP00000219746	0	0	0	0	0.077	0.075	0	0.734	0.753
CXCR4	ERBB2	4447439	4435897	9606.ENSP00000386884	9606.ENSP00000269571	0	0	0	0	0	0.084	0	0.74	0.752
PIGR	C3	4441870	4433951	9606.ENSP00000348888	9606.ENSP00000245907	0	0	0	0	0.064	0	0	0.746	0.752
CAV1	CCND1	4440933	4433391	9606.ENSP00000339191	9606.ENSP00000227507	0	0	0	0	0.214	0	0	0.697	0.752
CA9	EGFR	4445040	4436186	9606.ENSP00000367608	9606.ENSP00000275493	0	0	0	0	0.109	0	0	0.732	0.751
ANGPT2	KIT	4438957	4436763	9606.ENSP00000314897	9606.ENSP00000288135	0	0	0	0	0	0.051	0.6	0.398	0.751
FGF1	ERBB2	4451524	4435897	9606.ENSP00000480791	9606.ENSP00000269571	0	0	0	0	0	0	0.6	0.404	0.751
HSD11B2	HPGD	4439082	4437300	9606.ENSP00000316786	9606.ENSP00000296522	0	0	0	0	0.059	0	0	0.746	0.751
ABCB1	CAV1	4451279	4440933	9606.ENSP00000478255	9606.ENSP00000339191	0	0	0	0	0	0.379	0	0.613	0.75
FGF9	EGF	4445677	4435570	9606.ENSP00000371790	9606.ENSP00000265171	0	0	0	0	0	0.051	0	0.748	0.75
PKHD1	PLXNC1	4443672	4434641	9606.ENSP00000360158	9606.ENSP00000258526	0	0	0	0	0	0	0	0.749	0.749
RHCG	SLC9A3	4435805	4435520	9606.ENSP00000268122	9606.ENSP00000264938	0	0	0	0	0.061	0.412	0	0.583	0.749
RHBG	SLC9A2	4449979	4433611	9606.ENSP00000441197	9606.ENSP00000233969	0	0	0	0	0	0.266	0	0.671	0.748
SLC2A1	CA9	4448824	4445040	9606.ENSP00000416293	9606.ENSP00000367608	0	0	0	0	0.076	0	0	0.739	0.748
PGF	MMP9	4450339	4443919	9606.ENSP00000451040	9606.ENSP00000361405	0	0	0	0	0	0	0	0.748	0.748
TLR7	CSF1R	4445433	4436666	9606.ENSP00000370034	9606.ENSP00000286301	0	0	0	0	0.559	0.089	0	0.424	0.748
SLC30A2	SLC39A14	4444357	4442288	9606.ENSP00000363394	9606.ENSP00000352779	0.051	0	0	0	0	0.087	0	0.732	0.748
ANGPT2	EGFR	4438957	4436186	9606.ENSP00000314897	9606.ENSP00000275493	0	0	0	0	0.049	0	0.6	0.389	0.747
DTL	ANLN	4442781	4435644	9606.ENSP00000355958	9606.ENSP00000265748	0	0	0	0	0.719	0	0	0.136	0.747
CXCR4	PLG	4447439	4438461	9606.ENSP00000386884	9606.ENSP00000308938	0	0	0	0	0	0	0	0.746	0.747
APOC1	PEPD	4450772	4433882	9606.ENSP00000465356	9606.ENSP00000244137	0	0	0	0	0	0	0	0.746	0.746
PROM1	CXCR4	4449376	4447439	9606.ENSP00000426809	9606.ENSP00000386884	0	0	0	0	0	0	0	0.746	0.746
ITGAX	IGSF6	4450468	4435822	9606.ENSP00000454623	9606.ENSP00000268389	0	0	0	0	0.541	0	0	0.47	0.746
SCN2A	SCNN1A	4444560	4442340	9606.ENSP00000364586	9606.ENSP00000353292	0	0	0	0	0	0	0.72	0.13	0.746
PTPRC	CTSS	4448605	4443237	9606.ENSP00000411355	9606.ENSP00000357981	0	0	0	0	0.703	0	0	0.178	0.746
ANK3	GABARAPL1	4436396	4435700	9606.ENSP00000280772	9606.ENSP00000266458	0	0	0	0	0.062	0.733	0	0.064	0.745
C1QC	TREM2	4444427	4444111	9606.ENSP00000363770	9606.ENSP00000362205	0	0	0	0	0.581	0	0	0.416	0.745
PKHD1	PLXND1	4443672	4439102	9606.ENSP00000360158	9606.ENSP00000317128	0	0	0	0	0	0	0	0.745	0.745
FERMT3	PLEK	4436340	4433624	9606.ENSP00000279227	9606.ENSP00000234313	0	0	0	0	0.502	0	0	0.507	0.744
FBP1	PFKFB4	4448472	4433556	9606.ENSP00000408025	9606.ENSP00000232375	0	0	0	0	0.08	0	0.65	0.269	0.744
CTSS	CD53	4443237	4435973	9606.ENSP00000357981	9606.ENSP00000271324	0	0	0	0	0.656	0	0	0.285	0.743
ALAD	HPD	4447356	4436793	9606.ENSP00000386284	9606.ENSP00000289004	0	0	0	0	0	0	0	0.743	0.743
BRCA2	ERBB2	4445332	4435897	9606.ENSP00000369497	9606.ENSP00000269571	0	0	0	0	0	0	0	0.743	0.743
CCL18	CD163	4451437	4442211	9606.ENSP00000479955	9606.ENSP00000352071	0	0	0	0	0.255	0	0	0.669	0.742
PLCG2	ERBB4	4451677	4441238	9606.ENSP00000482457	9606.ENSP00000342235	0	0	0	0	0.06	0.177	0.6	0.266	0.742
TNFRSF9	IDO1	4451323	4449569	9606.ENSP00000478699	9606.ENSP00000430950	0	0	0	0	0	0	0	0.74	0.741
STRA6	RDH10	4450543	4433766	9606.ENSP00000456609	9606.ENSP00000240285	0	0	0	0	0	0	0	0.741	0.741
MUC1	ICAM1	4451890	4435501	9606.ENSP00000484824	9606.ENSP00000264832	0	0	0	0	0.076	0	0	0.73	0.74
CASP1	TLR7	4449658	4445433	9606.ENSP00000433138	9606.ENSP00000370034	0	0	0	0	0.117	0.08	0	0.706	0.74
CD163	CD86	4442211	4440320	9606.ENSP00000352071	9606.ENSP00000332049	0	0	0	0	0.23	0	0	0.676	0.74
ITGAX	TLR7	4450468	4445433	9606.ENSP00000454623	9606.ENSP00000370034	0	0	0	0	0.159	0.055	0	0.7	0.74
SLC22A8	SLC47A2	4440777	4439869	9606.ENSP00000337335	9606.ENSP00000326671	0	0	0	0	0.063	0	0	0.734	0.74
VEGFA	EGLN3	4451310	4434133	9606.ENSP00000478570	9606.ENSP00000250457	0	0	0	0	0.061	0	0	0.734	0.74
FKBP10	COL1A1	4439111	4433346	9606.ENSP00000317232	9606.ENSP00000225964	0	0	0	0	0.428	0	0	0.563	0.739
NEDD4L	WNK4	4446996	4434005	9606.ENSP00000383199	9606.ENSP00000246914	0	0	0	0	0.054	0.347	0	0.612	0.739
MTHFD2	PSAT1	4446222	4444751	9606.ENSP00000377617	9606.ENSP00000365773	0.161	0	0	0	0.244	0	0	0.622	0.739
DTL	EZH2	4442781	4439336	9606.ENSP00000355958	9606.ENSP00000320147	0	0	0	0	0.725	0	0	0.087	0.739
PGF	ERBB2	4450339	4435897	9606.ENSP00000451040	9606.ENSP00000269571	0	0	0	0	0	0	0.6	0.373	0.738
ANGPT2	CSF1R	4438957	4436666	9606.ENSP00000314897	9606.ENSP00000286301	0	0	0	0	0.118	0.051	0.6	0.31	0.738
MMP9	ALB	4443919	4437206	9606.ENSP00000361405	9606.ENSP00000295897	0	0	0	0	0.061	0	0	0.732	0.738
PGF	PAPPA	4450339	4440201	9606.ENSP00000451040	9606.ENSP00000330658	0	0	0	0	0	0	0	0.737	0.737
IDO1	TLR3	4449569	4437339	9606.ENSP00000430950	9606.ENSP00000296795	0	0	0	0	0	0	0	0.737	0.737
SELENBP1	SLC4A1	4447974	4435075	9606.ENSP00000397261	9606.ENSP00000262418	0	0	0	0	0.674	0	0	0.228	0.737
MMP9	ICAM1	4443919	4435501	9606.ENSP00000361405	9606.ENSP00000264832	0	0	0	0	0.093	0	0	0.722	0.737
C1QC	CD163	4444427	4442211	9606.ENSP00000363770	9606.ENSP00000352071	0	0	0	0	0.678	0	0	0.217	0.737
LCP1	SH3PXD2B	4446831	4438532	9606.ENSP00000381581	9606.ENSP00000309714	0	0	0	0	0.062	0.08	0.72	0	0.737
FBP1	PCK1	4448472	4439313	9606.ENSP00000408025	9606.ENSP00000319814	0	0	0	0	0.081	0	0	0.725	0.737
LAPTM5	NCKAP1L	4437079	4437010	9606.ENSP00000294507	9606.ENSP00000293373	0	0	0	0	0.612	0	0	0.351	0.737
KCNIP1	DPP6	4448751	4444940	9606.ENSP00000414886	9606.ENSP00000367001	0	0	0	0	0.172	0.058	0	0.69	0.737
C1QA	TREM2	4444428	4444111	9606.ENSP00000363773	9606.ENSP00000362205	0	0	0	0	0.574	0	0	0.406	0.736
CASP1	CYBB	4449658	4445083	9606.ENSP00000433138	9606.ENSP00000367851	0	0	0	0	0.232	0	0	0.67	0.736
CD86	C3AR1	4440320	4437821	9606.ENSP00000332049	9606.ENSP00000302079	0	0	0	0	0.428	0	0	0.557	0.736
ITGA4	LAMA4	4446627	4433505	9606.ENSP00000380227	9606.ENSP00000230538	0	0	0	0	0.061	0.157	0.6	0.267	0.736
DOCK2	PLEK	4434518	4433624	9606.ENSP00000256935	9606.ENSP00000234313	0	0	0	0	0.6	0	0	0.366	0.736
C1QC	C3AR1	4444427	4437821	9606.ENSP00000363770	9606.ENSP00000302079	0	0	0	0	0.467	0	0	0.523	0.735
SCN2A	SCNN1G	4444560	4437627	9606.ENSP00000364586	9606.ENSP00000300061	0	0	0	0	0	0	0.72	0.094	0.735
C1QB	IGSF6	4438900	4435822	9606.ENSP00000313967	9606.ENSP00000268389	0	0	0	0	0.717	0	0	0.102	0.735
PGF	MET	4450339	4439114	9606.ENSP00000451040	9606.ENSP00000317272	0	0	0	0	0	0	0.6	0.364	0.734
SCNN1G	SLC9A3	4437627	4435520	9606.ENSP00000300061	9606.ENSP00000264938	0	0	0	0	0	0	0	0.734	0.734
CASP1	BIRC3	4449658	4435265	9606.ENSP00000433138	9606.ENSP00000263464	0	0	0	0	0.161	0.469	0	0.449	0.734
SLC15A2	SLC22A8	4448865	4440777	9606.ENSP00000417085	9606.ENSP00000337335	0	0	0	0	0.063	0	0	0.726	0.733
MMP9	COL1A1	4443919	4433346	9606.ENSP00000361405	9606.ENSP00000225964	0	0	0	0	0.077	0.328	0	0.605	0.733
CCND1	SFRP1	4433391	4433131	9606.ENSP00000227507	9606.ENSP00000220772	0	0	0	0	0.098	0	0	0.716	0.733
EPCAM	GRHL2	4435308	4434193	9606.ENSP00000263735	9606.ENSP00000251808	0	0	0	0	0.341	0	0	0.611	0.733
CD53	DOCK2	4435973	4434518	9606.ENSP00000271324	9606.ENSP00000256935	0	0	0	0	0.674	0	0	0.212	0.732
TRPM6	CLDN16	4442420	4435489	9606.ENSP00000354006	9606.ENSP00000264734	0	0	0	0	0	0	0	0.732	0.732
NR3C2	SCNN1G	4442077	4437627	9606.ENSP00000350815	9606.ENSP00000300061	0	0	0	0	0	0.05	0	0.729	0.732
EGF	ICAM1	4435570	4435501	9606.ENSP00000265171	9606.ENSP00000264832	0	0	0	0	0	0	0	0.732	0.732
CCL20	TLR2	4442174	4434743	9606.ENSP00000351671	9606.ENSP00000260010	0	0	0	0	0.063	0	0	0.724	0.731
PLG	CP	4438461	4435459	9606.ENSP00000308938	9606.ENSP00000264613	0	0	0	0	0.209	0.379	0	0.497	0.731
C1QA	FCER1G	4444428	4436828	9606.ENSP00000363773	9606.ENSP00000289902	0	0	0	0	0.571	0	0	0.399	0.731
ITGAX	TYROBP	4450468	4435115	9606.ENSP00000454623	9606.ENSP00000262629	0	0	0	0	0.564	0	0	0.408	0.731
VEGFA	TLR2	4451310	4434743	9606.ENSP00000478570	9606.ENSP00000260010	0	0	0	0	0	0	0	0.731	0.731
CCL5	TLR2	4451102	4434743	9606.ENSP00000474412	9606.ENSP00000260010	0	0	0	0	0.137	0	0	0.7	0.73
CASP1	TLR3	4449658	4437339	9606.ENSP00000433138	9606.ENSP00000296795	0	0	0	0	0.064	0.08	0	0.712	0.73
CHL1	ST8SIA4	4434493	4433535	9606.ENSP00000256509	9606.ENSP00000231461	0	0	0	0	0	0	0	0.73	0.73
FGF1	MET	4451524	4439114	9606.ENSP00000480791	9606.ENSP00000317272	0	0	0	0	0	0.05	0.6	0.348	0.73
CALU	EGFR	4449856	4436186	9606.ENSP00000438248	9606.ENSP00000275493	0	0	0	0	0.087	0.387	0	0.557	0.73
SCN2A	SCNN1B	4444560	4441549	9606.ENSP00000364586	9606.ENSP00000345751	0	0	0	0	0	0	0.72	0.073	0.729
IDO1	CD86	4449569	4440320	9606.ENSP00000430950	9606.ENSP00000332049	0	0	0	0	0.103	0	0	0.71	0.729
VIM	FN1	4450181	4441661	9606.ENSP00000446007	9606.ENSP00000346839	0	0	0	0	0.131	0.08	0	0.688	0.729
TSPAN33	PLAT	4451814	4433132	9606.ENSP00000483872	9606.ENSP00000220809	0	0	0	0	0	0	0	0.728	0.728
MT1F	MT1E	4440608	4438349	9606.ENSP00000334872	9606.ENSP00000307706	0	0	0	0.975	0.722	0	0	0.875	0.728
FKBP10	PLOD2	4439111	4436514	9606.ENSP00000317232	9606.ENSP00000282903	0	0	0	0	0.16	0	0	0.689	0.728
TRPV5	TRPA1	4435580	4435031	9606.ENSP00000265310	9606.ENSP00000262209	0	0	0	0	0.061	0	0	0.722	0.728
ITGB2	MYO1F	4446737	4441469	9606.ENSP00000380948	9606.ENSP00000344871	0	0	0	0	0.626	0.183	0	0.181	0.728
SLC12A1	SCNN1A	4446564	4442340	9606.ENSP00000379822	9606.ENSP00000353292	0	0	0	0	0.061	0	0	0.722	0.727
VEGFA	CA9	4451310	4445040	9606.ENSP00000478570	9606.ENSP00000367608	0	0	0	0	0.088	0	0	0.713	0.727
SLC12A3	SCNN1B	4448218	4441549	9606.ENSP00000402152	9606.ENSP00000345751	0	0	0	0	0	0	0	0.727	0.727
MMP9	DCN	4443919	4432629	9606.ENSP00000361405	9606.ENSP00000052754	0	0	0	0	0.061	0	0	0.721	0.727
LY86	CSF1R	4445292	4436666	9606.ENSP00000369286	9606.ENSP00000286301	0	0	0	0	0.664	0	0	0.219	0.727
KCNJ1	SCNN1A	4446057	4442340	9606.ENSP00000376432	9606.ENSP00000353292	0	0	0	0	0.061	0	0	0.72	0.726
IGSF11	KCNJ13	4446183	4433605	9606.ENSP00000377370	9606.ENSP00000233826	0	0	0	0	0.063	0	0	0.719	0.726
NAPEPLD	PTPN22	4448440	4442291	9606.ENSP00000407112	9606.ENSP00000352833	0	0	0	0	0	0	0	0.726	0.726
PTPRC	CR2	4448605	4442797	9606.ENSP00000411355	9606.ENSP00000356024	0	0	0	0	0.096	0	0	0.709	0.726
PGF	NRP2	4450339	4442374	9606.ENSP00000451040	9606.ENSP00000353582	0	0	0	0	0	0.379	0	0.577	0.726
ATP1A1	ATP12A	4450152	4433055	9606.ENSP00000445306	9606.ENSP00000218548	0	0	0.449	0.969	0	0	0.72	0.191	0.725
ERBB2	EPCAM	4435897	4435308	9606.ENSP00000269571	9606.ENSP00000263735	0	0	0	0	0.098	0	0	0.708	0.725
SLC12A1	UMOD	4446564	4446508	9606.ENSP00000379822	9606.ENSP00000379438	0	0	0	0	0.141	0	0	0.693	0.725
CSF1R	PLEK	4436666	4433624	9606.ENSP00000286301	9606.ENSP00000234313	0	0	0	0	0.675	0	0	0.187	0.725
EGFR	LOX	4436186	4433517	9606.ENSP00000275493	9606.ENSP00000231004	0	0	0	0	0.196	0	0	0.671	0.724
GATA3	IL1RL1	4445191	4433610	9606.ENSP00000368632	9606.ENSP00000233954	0	0	0	0	0	0	0	0.724	0.724
CAV1	MET	4440933	4439114	9606.ENSP00000339191	9606.ENSP00000317272	0	0	0	0	0.214	0.057	0	0.657	0.723
CD2	CD53	4443326	4435973	9606.ENSP00000358490	9606.ENSP00000271324	0	0	0	0	0.37	0.379	0	0.351	0.723
TRPV5	WNK4	4435580	4434005	9606.ENSP00000265310	9606.ENSP00000246914	0	0	0	0	0.061	0.299	0	0.613	0.723
CXCR4	TLR2	4447439	4434743	9606.ENSP00000386884	9606.ENSP00000260010	0	0	0	0	0.076	0.379	0	0.557	0.723
SLA	LAPTM5	4447831	4437079	9606.ENSP00000394049	9606.ENSP00000294507	0	0	0	0	0.643	0	0	0.256	0.723
MET	ANGPT2	4439114	4438957	9606.ENSP00000317272	9606.ENSP00000314897	0	0	0	0	0	0.054	0.6	0.326	0.723
TYMS	FANCI	4439011	4438638	9606.ENSP00000315644	9606.ENSP00000310842	0	0	0	0	0.692	0	0	0.138	0.723
COBLL1	GRB14	4441146	4435334	9606.ENSP00000341360	9606.ENSP00000263915	0	0.169	0	0	0.061	0	0	0.673	0.722
FYB	DOCK2	4449385	4434518	9606.ENSP00000427114	9606.ENSP00000256935	0	0	0	0	0.461	0.313	0	0.311	0.722
ASS1	PHGDH	4443929	4443312	9606.ENSP00000361471	9606.ENSP00000358417	0.069	0	0	0	0.281	0.363	0	0.426	0.722
VEGFA	PLAT	4451310	4433132	9606.ENSP00000478570	9606.ENSP00000220809	0	0	0	0	0.084	0	0	0.707	0.721
C3AR1	FCER1G	4437821	4436828	9606.ENSP00000302079	9606.ENSP00000289902	0	0	0	0	0.569	0	0	0.38	0.721
VEGFA	ESM1	4451310	4445547	9606.ENSP00000478570	9606.ENSP00000370812	0	0	0	0	0.081	0	0	0.708	0.72
SH3PXD2B	FERMT3	4438532	4436340	9606.ENSP00000309714	9606.ENSP00000279227	0	0	0	0	0	0	0.72	0	0.72
EPB41L4B	SCNN1G	4444418	4437627	9606.ENSP00000363694	9606.ENSP00000300061	0	0	0	0	0	0	0	0.72	0.72
FGF1	ERBB4	4451524	4441238	9606.ENSP00000480791	9606.ENSP00000342235	0	0	0	0	0.098	0	0.6	0.287	0.72
TYMS	ANLN	4439011	4435644	9606.ENSP00000315644	9606.ENSP00000265748	0	0	0	0	0.696	0	0	0.113	0.719
TNFAIP3	PTPN22	4451592	4442291	9606.ENSP00000481570	9606.ENSP00000352833	0	0	0	0	0.103	0	0	0.7	0.719
MS4A6A	FCER1G	4447767	4436828	9606.ENSP00000392770	9606.ENSP00000289902	0	0	0	0	0.686	0	0	0.141	0.718
LY86	C1QC	4445292	4444427	9606.ENSP00000369286	9606.ENSP00000363770	0	0	0	0	0.585	0	0	0.348	0.718
MKI67	CCND1	4443142	4433391	9606.ENSP00000357643	9606.ENSP00000227507	0	0	0	0	0.076	0	0	0.707	0.718
HCK	FLT1	4450141	4436489	9606.ENSP00000444986	9606.ENSP00000282397	0	0	0	0.689	0	0.699	0	0.224	0.717
SCNN1A	PRSS8	4442340	4439305	9606.ENSP00000353292	9606.ENSP00000319730	0	0	0	0	0.234	0	0	0.645	0.717
SLC5A2	SLC13A3	4439964	4436329	9606.ENSP00000327943	9606.ENSP00000279027	0	0	0	0	0.077	0	0	0.706	0.717
ITGAX	CD163	4450468	4442211	9606.ENSP00000454623	9606.ENSP00000352071	0	0	0	0	0.181	0	0	0.669	0.717
VSIG4	TYROBP	4444445	4435115	9606.ENSP00000363869	9606.ENSP00000262629	0	0	0	0	0.69	0	0	0.123	0.717
MKI67	EZH2	4443142	4439336	9606.ENSP00000357643	9606.ENSP00000320147	0	0	0	0	0.538	0.124	0	0.356	0.717
NRP2	PLXND1	4442374	4439102	9606.ENSP00000353582	9606.ENSP00000317128	0	0	0	0	0.062	0.169	0	0.665	0.716
HCK	TLR2	4450141	4434743	9606.ENSP00000444986	9606.ENSP00000260010	0	0	0	0	0.576	0.123	0	0.297	0.716
PDK1	HK2	4446044	4436875	9606.ENSP00000376352	9606.ENSP00000290573	0	0	0	0	0.061	0	0	0.71	0.716
DCXR	SIM2	4437953	4436863	9606.ENSP00000303356	9606.ENSP00000290399	0	0	0	0	0	0	0	0.716	0.716
MET	EGFR	4439114	4436186	9606.ENSP00000317272	9606.ENSP00000275493	0	0	0	0.58	0.229	0.418	0	0.933	0.715
LY86	CD86	4445292	4440320	9606.ENSP00000369286	9606.ENSP00000332049	0	0	0	0	0.67	0	0	0.172	0.715
EGFR	SERPINE1	4436186	4433266	9606.ENSP00000275493	9606.ENSP00000223095	0	0	0	0	0.125	0	0	0.687	0.715
FGF9	CSF1R	4445677	4436666	9606.ENSP00000371790	9606.ENSP00000286301	0	0	0	0	0	0.267	0.6	0.107	0.715
TREM2	C1QB	4444111	4438900	9606.ENSP00000362205	9606.ENSP00000313967	0	0	0	0	0.596	0	0	0.322	0.715
PRDM16	PPARGC1A	4435959	4435507	9606.ENSP00000270722	9606.ENSP00000264867	0	0	0	0	0	0.064	0	0.708	0.715
MUC1	EPCAM	4451890	4435308	9606.ENSP00000484824	9606.ENSP00000263735	0	0	0	0	0.088	0	0	0.701	0.715
MMP9	SERPINE1	4443919	4433266	9606.ENSP00000361405	9606.ENSP00000223095	0	0	0	0	0.061	0	0	0.707	0.714
KCNJ10	SLC26A4	4443029	4435634	9606.ENSP00000357068	9606.ENSP00000265715	0	0	0	0	0	0	0	0.714	0.714
ITGB2	CD2	4446737	4443326	9606.ENSP00000380948	9606.ENSP00000358490	0	0	0	0	0.526	0	0	0.421	0.714
FN1	FBLN5	4441661	4441481	9606.ENSP00000346839	9606.ENSP00000345008	0	0	0	0	0.106	0	0	0.693	0.714
MS4A6A	C1QA	4447767	4444428	9606.ENSP00000392770	9606.ENSP00000363773	0	0	0	0	0.68	0	0	0.138	0.713
VEGFA	PLXND1	4451310	4439102	9606.ENSP00000478570	9606.ENSP00000317128	0	0	0	0	0.061	0	0	0.707	0.713
COL1A1	TIMP1	4433346	4433052	9606.ENSP00000225964	9606.ENSP00000218388	0	0	0	0	0.145	0	0	0.678	0.713
PTHLH	EGF	4450000	4435570	9606.ENSP00000441765	9606.ENSP00000265171	0	0	0	0	0	0	0	0.712	0.712
PLCG2	PIK3C2G	4451677	4450156	9606.ENSP00000482457	9606.ENSP00000445381	0	0	0	0	0.062	0.157	0.65	0.084	0.712
MS4A6A	CSF1R	4447767	4436666	9606.ENSP00000392770	9606.ENSP00000286301	0	0	0	0	0.704	0	0	0.064	0.712
MS4A6A	LY86	4447767	4445292	9606.ENSP00000392770	9606.ENSP00000369286	0	0	0	0	0.68	0	0	0.133	0.711
CCL5	ITGAX	4451102	4450468	9606.ENSP00000474412	9606.ENSP00000454623	0	0	0	0	0.2	0	0	0.653	0.711
PLCG2	PLCD4	4451677	4447559	9606.ENSP00000482457	9606.ENSP00000388631	0	0	0	0.67	0	0	0.65	0.551	0.711
SLC34A1	STC2	4439443	4435556	9606.ENSP00000321424	9606.ENSP00000265087	0	0	0	0	0	0	0	0.711	0.711
SLC22A6	SLC13A3	4444960	4436329	9606.ENSP00000367102	9606.ENSP00000279027	0	0	0	0	0.09	0	0	0.695	0.711
PDE1A	GMPR	4448547	4434720	9606.ENSP00000410309	9606.ENSP00000259727	0	0	0	0	0.051	0	0.65	0.197	0.71
ADH1B	GSTM3	4438237	4434500	9606.ENSP00000306606	9606.ENSP00000256594	0	0	0	0	0.049	0	0.65	0.199	0.71
ITGA4	COL1A1	4446627	4433346	9606.ENSP00000380227	9606.ENSP00000225964	0	0	0	0	0.063	0	0.6	0.289	0.71
ENO2	KRT7	4449816	4440087	9606.ENSP00000437402	9606.ENSP00000329243	0	0	0	0	0	0	0	0.71	0.71
TRPM6	SLC41A2	4442420	4434643	9606.ENSP00000354006	9606.ENSP00000258538	0	0	0	0	0	0	0	0.71	0.71
MUC1	UMOD	4451890	4446508	9606.ENSP00000484824	9606.ENSP00000379438	0	0	0	0	0	0	0	0.71	0.71
FCER1G	CSF1R	4436828	4436666	9606.ENSP00000289902	9606.ENSP00000286301	0	0	0	0	0.664	0	0	0.172	0.71
ABCG1	PCP4	4442587	4440099	9606.ENSP00000354995	9606.ENSP00000329403	0	0	0	0	0	0	0	0.71	0.71
CD86	TLR3	4440320	4437339	9606.ENSP00000332049	9606.ENSP00000296795	0	0	0	0	0.062	0	0	0.704	0.71
SLC15A2	SLC22A6	4448865	4444960	9606.ENSP00000417085	9606.ENSP00000367102	0	0	0	0	0.063	0	0	0.703	0.71
VEGFA	PROM1	4451310	4449376	9606.ENSP00000478570	9606.ENSP00000426809	0	0	0	0	0	0	0	0.709	0.709
VEGFA	WT1	4451310	4440250	9606.ENSP00000478570	9606.ENSP00000331327	0	0	0	0	0	0	0	0.709	0.709
TGFA	FLT1	4437149	4436489	9606.ENSP00000295400	9606.ENSP00000282397	0	0	0	0	0.061	0	0.6	0.286	0.708
C3AR1	CSF1R	4437821	4436666	9606.ENSP00000302079	9606.ENSP00000286301	0	0	0	0	0.63	0	0	0.243	0.708
THRB	PPARGC1A	4446585	4435507	9606.ENSP00000379904	9606.ENSP00000264867	0	0	0	0	0.095	0.592	0	0.27	0.707
TRPM6	EGF	4442420	4435570	9606.ENSP00000354006	9606.ENSP00000265171	0	0	0	0	0	0	0	0.707	0.707
CD2	LCP2	4443326	4432628	9606.ENSP00000358490	9606.ENSP00000046794	0	0	0	0	0.533	0	0	0.399	0.707
TSPAN33	PLG	4451814	4438461	9606.ENSP00000483872	9606.ENSP00000308938	0	0	0	0	0.064	0	0	0.7	0.707
HCK	LCP2	4450141	4432628	9606.ENSP00000444986	9606.ENSP00000046794	0	0	0	0	0.393	0.227	0	0.426	0.707
SLC6A19	SLC7A9	4438117	4432606	9606.ENSP00000305302	9606.ENSP00000023064	0	0	0	0	0.094	0	0	0.689	0.706
ALB	KIT	4437206	4436763	9606.ENSP00000295897	9606.ENSP00000288135	0	0	0	0	0	0	0	0.706	0.706
GGT6	GSTM3	4445563	4434500	9606.ENSP00000370962	9606.ENSP00000256594	0	0	0	0	0.061	0	0.65	0.178	0.706
MKI67	FANCI	4443142	4438638	9606.ENSP00000357643	9606.ENSP00000310842	0	0	0	0	0.659	0	0	0.168	0.705
PDK1	PDP2	4446044	4438515	9606.ENSP00000376352	9606.ENSP00000309548	0	0	0	0	0.172	0.09	0	0.64	0.705
CCL5	TLR3	4451102	4437339	9606.ENSP00000474412	9606.ENSP00000296795	0	0	0	0	0	0	0	0.705	0.705
USP2	CCND1	4434754	4433391	9606.ENSP00000260187	9606.ENSP00000227507	0	0	0	0	0	0.379	0	0.544	0.705
WT1	KRT7	4440250	4440087	9606.ENSP00000331327	9606.ENSP00000329243	0	0	0	0	0	0	0	0.705	0.705
PGF	ANGPT2	4450339	4438957	9606.ENSP00000451040	9606.ENSP00000314897	0	0	0	0	0	0	0	0.705	0.705
FGF9	ERBB2	4445677	4435897	9606.ENSP00000371790	9606.ENSP00000269571	0	0	0	0	0.052	0	0.6	0.285	0.705
PLCD4	PIK3CG	4447559	4442215	9606.ENSP00000388631	9606.ENSP00000352121	0	0	0	0	0.062	0.157	0.65	0.062	0.705
MS4A6A	IGSF6	4447767	4435822	9606.ENSP00000392770	9606.ENSP00000268389	0	0	0	0	0.634	0	0	0.225	0.704
ITGB2	TLR2	4446737	4434743	9606.ENSP00000380948	9606.ENSP00000260010	0	0	0	0	0.552	0.062	0	0.353	0.704
GPD1L	ALDOC	4436498	4433361	9606.ENSP00000282541	9606.ENSP00000226253	0	0	0	0	0.081	0.43	0	0.48	0.704
EGF	PLAT	4435570	4433132	9606.ENSP00000265171	9606.ENSP00000220809	0	0	0	0	0.061	0	0	0.697	0.704
ANK2	KCNJ2	4441946	4433856	9606.ENSP00000349588	9606.ENSP00000243457	0	0	0	0	0	0.05	0	0.701	0.704
CSF1R	FCGR2A	4436666	4435978	9606.ENSP00000286301	9606.ENSP00000271450	0	0	0	0	0.393	0	0	0.53	0.703
CD48	PLEK	4451851	4433624	9606.ENSP00000484431	9606.ENSP00000234313	0	0	0	0	0.683	0	0	0.101	0.703
SERPINA5	ALB	4440432	4437206	9606.ENSP00000333203	9606.ENSP00000295897	0	0	0	0	0.349	0	0	0.562	0.703
MS4A6A	MS4A4A	4447767	4440887	9606.ENSP00000392770	9606.ENSP00000338648	0	0	0	0.641	0.561	0	0	0.904	0.703
CD86	TYROBP	4440320	4435115	9606.ENSP00000332049	9606.ENSP00000262629	0	0	0	0	0.549	0	0	0.369	0.703
MKI67	DTL	4443142	4442781	9606.ENSP00000357643	9606.ENSP00000355958	0	0	0	0	0.703	0	0	0	0.703
KL	ENPP1	4445327	4442442	9606.ENSP00000369442	9606.ENSP00000354238	0	0	0	0	0	0	0	0.703	0.703
CD86	CSF1R	4440320	4436666	9606.ENSP00000332049	9606.ENSP00000286301	0	0	0	0	0.352	0	0	0.559	0.702
FBP1	G6PC	4448472	4434327	9606.ENSP00000408025	9606.ENSP00000253801	0	0	0	0	0.085	0	0	0.688	0.702
HCK	FCER1G	4450141	4436828	9606.ENSP00000444986	9606.ENSP00000289902	0	0	0	0	0.585	0.128	0	0.243	0.702
TLR7	LY86	4445433	4445292	9606.ENSP00000370034	9606.ENSP00000369286	0	0	0	0	0.382	0.394	0	0.268	0.702
MYO1F	LAPTM5	4441469	4437079	9606.ENSP00000344871	9606.ENSP00000294507	0	0	0	0	0.526	0	0	0.398	0.702
PTPRC	ICAM1	4448605	4435501	9606.ENSP00000411355	9606.ENSP00000264832	0	0	0	0	0.095	0	0	0.684	0.702
PCP4	SIM2	4440099	4436863	9606.ENSP00000329403	9606.ENSP00000290399	0	0	0	0	0	0	0	0.701	0.701
NR1I3	PPARGC1A	4442999	4435507	9606.ENSP00000356959	9606.ENSP00000264867	0	0	0	0	0.05	0.548	0	0.359	0.701
SLC2A1	PDK1	4448824	4446044	9606.ENSP00000416293	9606.ENSP00000376352	0	0	0	0	0.064	0.055	0	0.689	0.701
SCNN1A	NR3C2	4442340	4442077	9606.ENSP00000353292	9606.ENSP00000350815	0	0	0	0	0.06	0.05	0	0.692	0.701
MARVELD2	CGN	4439590	4435986	9606.ENSP00000323264	9606.ENSP00000271636	0	0	0	0	0.082	0	0	0.688	0.701
KRT7	KIT	4440087	4436763	9606.ENSP00000329243	9606.ENSP00000288135	0	0	0	0	0	0	0	0.7	0.7
KRT7	EPCAM	4440087	4435308	9606.ENSP00000329243	9606.ENSP00000263735	0	0	0	0	0.11	0	0	0.677	0.7
CASR	CLCNKB	4449096	4444605	9606.ENSP00000420194	9606.ENSP00000364831	0	0	0	0	0.061	0	0	0.693	0.7
ADH1C	GSTM3	4449347	4434500	9606.ENSP00000426083	9606.ENSP00000256594	0	0	0	0	0.049	0	0.65	0.172	0.7
PTHLH	CCND1	4450000	4433391	9606.ENSP00000441765	9606.ENSP00000227507	0	0	0	0	0.077	0	0	0.687	0.699
PTPRC	CD163	4448605	4442211	9606.ENSP00000411355	9606.ENSP00000352071	0	0	0	0	0.163	0	0	0.655	0.699
CTSS	IGSF6	4443237	4435822	9606.ENSP00000357981	9606.ENSP00000268389	0	0	0	0	0.597	0	0	0.283	0.699
EZH2	SFRP1	4439336	4433131	9606.ENSP00000320147	9606.ENSP00000220772	0	0	0	0	0	0.261	0	0.61	0.699
TYROBP	NKG7	4435115	4433194	9606.ENSP00000262629	9606.ENSP00000221978	0	0	0	0	0.562	0	0	0.341	0.699
CXCR4	TLR3	4447439	4437339	9606.ENSP00000386884	9606.ENSP00000296795	0	0	0	0	0	0	0	0.699	0.699
TOP2A	CDCA2	4448614	4439997	9606.ENSP00000411532	9606.ENSP00000328228	0	0	0	0	0.656	0	0	0.162	0.699
PIK3C2G	PLCD4	4450156	4447559	9606.ENSP00000445381	9606.ENSP00000388631	0	0	0	0	0	0.157	0.65	0.062	0.699
APBB1IP	LCP2	4444696	4432628	9606.ENSP00000365411	9606.ENSP00000046794	0	0	0	0	0.386	0	0	0.53	0.699
AGMAT	ASS1	4444634	4443929	9606.ENSP00000364986	9606.ENSP00000361471	0	0	0	0	0.097	0	0	0.679	0.698
ICAM1	SERPINE1	4435501	4433266	9606.ENSP00000264832	9606.ENSP00000223095	0	0	0	0	0.088	0	0	0.683	0.698
HK2	SLC2A3	4436875	4432652	9606.ENSP00000290573	9606.ENSP00000075120	0	0	0	0	0.063	0	0	0.691	0.698
FGF9	ERBB4	4445677	4441238	9606.ENSP00000371790	9606.ENSP00000342235	0	0	0	0	0.089	0	0.6	0.236	0.697
CTSS	LCP2	4443237	4432628	9606.ENSP00000357981	9606.ENSP00000046794	0	0	0	0	0.692	0	0	0.056	0.697
CALU	PRKCDBP	4449856	4438313	9606.ENSP00000438248	9606.ENSP00000307292	0	0	0	0	0.07	0.688	0	0.041	0.697
FBP1	PCK2	4448472	4432982	9606.ENSP00000408025	9606.ENSP00000216780	0	0	0	0	0.149	0	0	0.659	0.697
KCNJ1	TRPV5	4446057	4435580	9606.ENSP00000376432	9606.ENSP00000265310	0	0	0	0	0.062	0	0	0.69	0.697
ACOT11	UGT3A1	4443721	4436122	9606.ENSP00000360366	9606.ENSP00000274278	0	0	0	0	0.697	0	0	0.043	0.697
SCNN1G	AQP2	4437627	4432767	9606.ENSP00000300061	9606.ENSP00000199280	0	0	0	0	0.061	0	0	0.691	0.697
FN1	CAV1	4441661	4440933	9606.ENSP00000346839	9606.ENSP00000339191	0	0	0	0	0.286	0	0	0.593	0.697
LIX1	UGT3A1	4436132	4436122	9606.ENSP00000274382	9606.ENSP00000274278	0	0	0	0	0.697	0	0	0	0.697
LCP1	CD53	4446831	4435973	9606.ENSP00000381581	9606.ENSP00000271324	0	0	0	0	0.674	0	0	0.107	0.696
ITGB2	LY86	4446737	4445292	9606.ENSP00000380948	9606.ENSP00000369286	0	0	0	0	0.633	0	0	0.206	0.696
CR2	CD86	4442797	4440320	9606.ENSP00000356024	9606.ENSP00000332049	0	0	0	0	0.064	0	0	0.688	0.696
MAL	PLLP	4438642	4433069	9606.ENSP00000310880	9606.ENSP00000219207	0	0	0	0	0.064	0	0	0.689	0.696
MKI67	TYMS	4443142	4439011	9606.ENSP00000357643	9606.ENSP00000315644	0	0	0	0	0.553	0	0	0.348	0.696
PARVG	FERMT3	4447700	4436340	9606.ENSP00000391583	9606.ENSP00000279227	0	0	0	0	0.363	0.264	0	0.401	0.695
ITGB2	C1QC	4446737	4444427	9606.ENSP00000380948	9606.ENSP00000363770	0	0	0	0	0.46	0	0	0.459	0.695
SLC2A1	PFKP	4448824	4445499	9606.ENSP00000416293	9606.ENSP00000370517	0	0	0	0	0.108	0	0	0.671	0.695
FGFR2	TGFA	4448546	4437149	9606.ENSP00000410294	9606.ENSP00000295400	0	0	0	0	0	0	0.6	0.267	0.694
MFSD4	SCNN1A	4442820	4442340	9606.ENSP00000356115	9606.ENSP00000353292	0	0	0	0	0	0	0	0.693	0.693
SLC22A8	SLC13A3	4440777	4436329	9606.ENSP00000337335	9606.ENSP00000279027	0	0	0	0	0.082	0	0	0.679	0.693
CASR	TRPV5	4449096	4435580	9606.ENSP00000420194	9606.ENSP00000265310	0	0	0	0	0.062	0	0	0.685	0.692
PSMB9	ESRRG	4444464	4442769	9606.ENSP00000363993	9606.ENSP00000355904	0	0	0	0	0	0	0	0.692	0.692
CCL5	TLR7	4451102	4445433	9606.ENSP00000474412	9606.ENSP00000370034	0	0	0	0	0.11	0	0	0.669	0.692
ITGA4	COL4A1	4446627	4444632	9606.ENSP00000380227	9606.ENSP00000364979	0	0	0	0	0.063	0	0.6	0.245	0.692
CCL5	CD86	4451102	4440320	9606.ENSP00000474412	9606.ENSP00000332049	0	0	0	0	0.152	0	0	0.651	0.691
IGFBP3	CAV1	4445494	4440933	9606.ENSP00000370473	9606.ENSP00000339191	0	0	0	0	0.3	0.379	0	0.348	0.691
TLR7	PTPN22	4445433	4442291	9606.ENSP00000370034	9606.ENSP00000352833	0	0	0	0	0.527	0.063	0	0.359	0.691
PLCD4	INPP5J	4447559	4440437	9606.ENSP00000388631	9606.ENSP00000333262	0	0	0	0	0.061	0.125	0.65	0.052	0.69
RAB25	PRSS8	4442453	4439305	9606.ENSP00000354376	9606.ENSP00000319730	0	0	0	0	0.563	0.052	0	0.311	0.69
NPHS1	PTPRO	4445133	4436417	9606.ENSP00000368190	9606.ENSP00000281171	0	0	0	0	0	0.079	0	0.677	0.69
FCGR2A	TLR2	4435978	4434743	9606.ENSP00000271450	9606.ENSP00000260010	0	0	0	0	0.336	0	0	0.553	0.69
RAB25	GRHL2	4442453	4434193	9606.ENSP00000354376	9606.ENSP00000251808	0	0	0	0	0.544	0	0	0.348	0.69
KRT7	ERBB2	4440087	4435897	9606.ENSP00000329243	9606.ENSP00000269571	0	0	0	0	0.104	0	0	0.669	0.69
CXCR4	CCND1	4447439	4433391	9606.ENSP00000386884	9606.ENSP00000227507	0	0	0	0	0	0	0	0.689	0.689
EVI2B	LCP2	4440484	4432628	9606.ENSP00000333779	9606.ENSP00000046794	0	0	0	0	0.633	0	0	0.187	0.689
SLC12A3	SLC9A3	4448218	4435520	9606.ENSP00000402152	9606.ENSP00000264938	0	0	0	0	0	0.064	0	0.682	0.689
FGF9	MET	4445677	4439114	9606.ENSP00000371790	9606.ENSP00000317272	0	0	0	0	0	0.05	0.6	0.247	0.689
FGF1	EGF	4451524	4435570	9606.ENSP00000480791	9606.ENSP00000265171	0	0	0	0	0	0.051	0	0.685	0.688
ITGAX	KIT	4450468	4436763	9606.ENSP00000454623	9606.ENSP00000288135	0	0	0	0	0	0	0	0.688	0.688
CD163	MS4A4A	4442211	4440887	9606.ENSP00000352071	9606.ENSP00000338648	0	0	0	0	0.541	0	0	0.35	0.688
ADH6	GSTM3	4446342	4434500	9606.ENSP00000378359	9606.ENSP00000256594	0	0	0	0	0	0	0.65	0.147	0.688
MKI67	ANLN	4443142	4435644	9606.ENSP00000357643	9606.ENSP00000265748	0	0	0	0	0.59	0	0	0.267	0.687
ANGPT2	PDGFRA	4438957	4434540	9606.ENSP00000314897	9606.ENSP00000257290	0	0	0	0	0.049	0.051	0.6	0.236	0.687
ABCB1	TYMS	4451279	4439011	9606.ENSP00000478255	9606.ENSP00000315644	0	0	0	0	0.063	0	0	0.679	0.687
ESRRG	NR0B2	4442769	4434348	9606.ENSP00000355904	9606.ENSP00000254227	0	0	0	0	0	0.379	0	0.517	0.687
MS4A6A	C1QB	4447767	4438900	9606.ENSP00000392770	9606.ENSP00000313967	0	0	0	0	0.643	0	0	0.157	0.687
SERPINA5	KLK1	4440432	4437758	9606.ENSP00000333203	9606.ENSP00000301420	0	0	0	0	0	0.435	0	0.468	0.687
CD48	KIT	4451851	4436763	9606.ENSP00000484431	9606.ENSP00000288135	0	0	0	0	0	0	0	0.686	0.686
KL	SLC34A1	4445327	4439443	9606.ENSP00000369442	9606.ENSP00000321424	0	0	0	0	0.081	0	0	0.673	0.686
CCND1	TIMP1	4433391	4433052	9606.ENSP00000227507	9606.ENSP00000218388	0	0	0	0	0.081	0	0	0.673	0.686
SLC12A3	AQP2	4448218	4432767	9606.ENSP00000402152	9606.ENSP00000199280	0	0	0	0	0.061	0	0	0.679	0.686
PLCG2	INPP5J	4451677	4440437	9606.ENSP00000482457	9606.ENSP00000333262	0	0	0	0	0.049	0.125	0.65	0.052	0.686
ABCA1	CAV1	4444444	4440933	9606.ENSP00000363868	9606.ENSP00000339191	0	0	0	0	0	0	0	0.686	0.686
PNMA2	DPP6	4449500	4444940	9606.ENSP00000429344	9606.ENSP00000367001	0	0	0	0	0.156	0	0	0.641	0.685
ICAM1	TLR2	4435501	4434743	9606.ENSP00000264832	9606.ENSP00000260010	0	0	0	0	0.088	0	0	0.669	0.685
MMP9	TLR3	4443919	4437339	9606.ENSP00000361405	9606.ENSP00000296795	0	0	0	0	0	0	0	0.685	0.685
CD2	CR2	4443326	4442797	9606.ENSP00000358490	9606.ENSP00000356024	0	0	0	0	0.083	0	0	0.671	0.685
VEGFA	EZH2	4451310	4439336	9606.ENSP00000478570	9606.ENSP00000320147	0	0	0	0	0	0	0	0.685	0.685
FGFR2	ANGPT2	4448546	4438957	9606.ENSP00000410294	9606.ENSP00000314897	0	0	0	0	0	0.051	0.6	0.237	0.685
MYH10	PVALB	4442375	4432927	9606.ENSP00000353590	9606.ENSP00000216200	0	0	0	0	0.064	0.579	0	0.262	0.684
PBX1	MECOM	4448380	4435476	9606.ENSP00000405890	9606.ENSP00000264674	0	0	0	0	0.061	0.063	0	0.669	0.684
ITGAX	TLR3	4450468	4437339	9606.ENSP00000454623	9606.ENSP00000296795	0	0	0	0	0.059	0.055	0	0.674	0.684
SLC12A1	CLCN5	4446564	4444675	9606.ENSP00000379822	9606.ENSP00000365256	0	0	0	0	0.061	0.05	0	0.674	0.684
PGF	PDGFRA	4450339	4434540	9606.ENSP00000451040	9606.ENSP00000257290	0	0	0	0	0	0.058	0.6	0.226	0.683
SLC9A3	AQP2	4435520	4432767	9606.ENSP00000264938	9606.ENSP00000199280	0	0	0	0	0.063	0	0	0.676	0.683
ITGAX	CR2	4450468	4442797	9606.ENSP00000454623	9606.ENSP00000356024	0	0	0	0	0	0	0	0.683	0.683
PGF	FGFR2	4450339	4448546	9606.ENSP00000451040	9606.ENSP00000410294	0	0	0	0	0	0.058	0.6	0.227	0.683
ALB	ERBB2	4437206	4435897	9606.ENSP00000295897	9606.ENSP00000269571	0	0	0	0	0	0	0	0.683	0.683
TLR3	EGFR	4437339	4436186	9606.ENSP00000296795	9606.ENSP00000275493	0	0	0	0	0	0.079	0	0.67	0.683
HRG	AFM	4433552	4433367	9606.ENSP00000232003	9606.ENSP00000226355	0	0	0	0	0.232	0	0	0.604	0.683
CXCR4	FN1	4447439	4441661	9606.ENSP00000386884	9606.ENSP00000346839	0	0	0	0	0	0	0	0.683	0.683
C1QB	SLAMF8	4438900	4436821	9606.ENSP00000313967	9606.ENSP00000289707	0	0	0	0	0.682	0	0	0	0.682
HCK	ALOX5	4450141	4444382	9606.ENSP00000444986	9606.ENSP00000363512	0	0	0	0	0.535	0.313	0	0.085	0.682
MS4A6A	TREM2	4447767	4444111	9606.ENSP00000392770	9606.ENSP00000362205	0	0	0	0	0.18	0	0	0.629	0.682
PTPRD	TOX3	4445514	4433101	9606.ENSP00000370593	9606.ENSP00000219746	0	0	0	0	0.095	0.05	0	0.66	0.682
PTPRC	TLR2	4448605	4434743	9606.ENSP00000411355	9606.ENSP00000260010	0	0	0	0	0.269	0.063	0	0.573	0.682
SLC5A2	SLC16A7	4439964	4434831	9606.ENSP00000327943	9606.ENSP00000261187	0	0	0	0	0.05	0	0	0.679	0.682
PARVG	ITGA4	4447700	4446627	9606.ENSP00000391583	9606.ENSP00000380227	0	0	0	0	0.154	0	0.6	0.136	0.682
KCNJ10	SLC1A3	4443029	4435561	9606.ENSP00000357068	9606.ENSP00000265113	0	0	0	0	0.194	0	0	0.622	0.682
CD163	C1orf162	4442211	4441401	9606.ENSP00000352071	9606.ENSP00000344218	0	0	0	0	0.681	0	0	0	0.681
MCOLN3	TRPA1	4443579	4435031	9606.ENSP00000359621	9606.ENSP00000262209	0	0	0	0	0	0	0	0.681	0.681
CCL5	CD2	4451102	4443326	9606.ENSP00000474412	9606.ENSP00000358490	0	0	0	0	0.567	0	0	0.295	0.681
CASR	SLC12A1	4449096	4446564	9606.ENSP00000420194	9606.ENSP00000379822	0	0	0	0	0.062	0.078	0	0.66	0.681
CTSS	BIRC3	4443237	4435265	9606.ENSP00000357981	9606.ENSP00000263464	0	0	0	0	0.164	0	0.6	0.121	0.68
LY86	LAPTM5	4445292	4437079	9606.ENSP00000369286	9606.ENSP00000294507	0	0	0	0	0.588	0	0	0.253	0.68
PARVG	LCP2	4447700	4432628	9606.ENSP00000391583	9606.ENSP00000046794	0	0	0	0	0.662	0	0	0.09	0.68
TRPM6	TRPA1	4442420	4435031	9606.ENSP00000354006	9606.ENSP00000262209	0	0	0	0	0	0	0	0.68	0.68
ABCB1	CYP2B6	4451279	4439703	9606.ENSP00000478255	9606.ENSP00000324648	0	0	0	0	0.062	0	0	0.673	0.68
EPCAM	CCND1	4435308	4433391	9606.ENSP00000263735	9606.ENSP00000227507	0	0	0	0	0.065	0	0	0.671	0.68
CA9	MMP9	4445040	4443919	9606.ENSP00000367608	9606.ENSP00000361405	0	0	0	0	0	0	0	0.68	0.68
VEGFA	FGF9	4451310	4445677	9606.ENSP00000478570	9606.ENSP00000371790	0	0	0	0	0.064	0	0	0.67	0.679
TNFRSF9	CD70	4451323	4433950	9606.ENSP00000478699	9606.ENSP00000245903	0	0	0	0	0.061	0	0	0.673	0.679
PTPRC	LAPTM5	4448605	4437079	9606.ENSP00000411355	9606.ENSP00000294507	0	0	0	0	0.64	0	0	0.145	0.679
PRSS8	SCNN1G	4439305	4437627	9606.ENSP00000319730	9606.ENSP00000300061	0	0	0	0	0.063	0	0	0.671	0.679
VEGFA	PTPRC	4451310	4448605	9606.ENSP00000478570	9606.ENSP00000411355	0	0	0	0	0	0	0	0.678	0.678
SLC16A7	SLC2A3	4434831	4432652	9606.ENSP00000261187	9606.ENSP00000075120	0	0	0	0	0.055	0	0	0.674	0.678
WT1	EZH2	4440250	4439336	9606.ENSP00000331327	9606.ENSP00000320147	0	0	0	0	0.051	0.407	0	0.475	0.678
ANK3	FERMT3	4436396	4436340	9606.ENSP00000280772	9606.ENSP00000279227	0	0	0	0	0	0.129	0	0.645	0.678
CCL5	PTPRC	4451102	4448605	9606.ENSP00000474412	9606.ENSP00000411355	0	0	0	0	0.223	0	0	0.602	0.678
CD86	CD70	4440320	4433950	9606.ENSP00000332049	9606.ENSP00000245903	0	0	0	0	0.061	0	0	0.67	0.677
IGFBP3	COL1A1	4445494	4433346	9606.ENSP00000370473	9606.ENSP00000225964	0	0	0	0	0.29	0.379	0	0.328	0.677
FABP6	NR0B2	4446212	4434348	9606.ENSP00000377549	9606.ENSP00000254227	0	0	0	0	0	0.064	0	0.669	0.676
NPHS2	PTPRO	4442926	4436417	9606.ENSP00000356587	9606.ENSP00000281171	0	0	0	0	0	0.05	0	0.673	0.676
CD2	ICAM1	4443326	4435501	9606.ENSP00000358490	9606.ENSP00000264832	0	0	0	0	0.061	0	0	0.67	0.676
PLG	FLT1	4438461	4436489	9606.ENSP00000308938	9606.ENSP00000282397	0	0	0	0	0.05	0	0	0.673	0.676
PTHLH	EGFR	4450000	4436186	9606.ENSP00000441765	9606.ENSP00000275493	0	0	0	0	0.134	0	0	0.64	0.675
PROC	HRG	4433614	4433552	9606.ENSP00000234071	9606.ENSP00000232003	0	0	0	0	0.656	0	0	0.094	0.675
WT1	EGFR	4440250	4436186	9606.ENSP00000331327	9606.ENSP00000275493	0	0	0	0	0	0.054	0	0.671	0.675
SLA	LCP2	4447831	4432628	9606.ENSP00000394049	9606.ENSP00000046794	0	0	0	0	0.554	0	0	0.301	0.675
TSPAN8	IGF2BP2	4446135	4445662	9606.ENSP00000377003	9606.ENSP00000371634	0	0	0	0	0	0	0	0.675	0.675
SLC7A8	SLC1A4	4439361	4433621	9606.ENSP00000320378	9606.ENSP00000234256	0	0	0	0	0.049	0.085	0	0.656	0.675
SLC4A1	ATP6V1B1	4435075	4433629	9606.ENSP00000262418	9606.ENSP00000234396	0	0	0	0	0.061	0	0	0.668	0.674
FGF1	MMP9	4451524	4443919	9606.ENSP00000480791	9606.ENSP00000361405	0	0	0	0	0	0	0	0.673	0.674
LY86	FCER1G	4445292	4436828	9606.ENSP00000369286	9606.ENSP00000289902	0	0	0	0	0.562	0	0	0.287	0.674
EGFR	EPCAM	4436186	4435308	9606.ENSP00000275493	9606.ENSP00000263735	0	0	0	0	0	0	0	0.673	0.673
ITGB2	C1orf162	4446737	4441401	9606.ENSP00000380948	9606.ENSP00000344218	0	0	0	0	0.673	0	0	0	0.673
SCNN1G	SLC26A4	4437627	4435634	9606.ENSP00000300061	9606.ENSP00000265715	0	0	0	0	0.059	0	0	0.666	0.673
CASR	CLDN16	4449096	4435489	9606.ENSP00000420194	9606.ENSP00000264734	0	0	0	0	0	0	0	0.673	0.673
PPP1R3B	PYGL	4438400	4432954	9606.ENSP00000308318	9606.ENSP00000216392	0	0	0	0	0.109	0.265	0	0.541	0.673
IGSF6	PLEK	4435822	4433624	9606.ENSP00000268389	9606.ENSP00000234313	0	0	0	0	0.672	0	0	0	0.672
SLA	TYROBP	4447831	4435115	9606.ENSP00000394049	9606.ENSP00000262629	0	0	0	0	0.672	0	0	0	0.672
PPARGC1A	G6PC	4435507	4434327	9606.ENSP00000264867	9606.ENSP00000253801	0	0	0	0	0	0	0	0.672	0.672
FN1	MET	4441661	4439114	9606.ENSP00000346839	9606.ENSP00000317272	0	0	0	0	0.098	0.261	0	0.546	0.671
SERPINA5	PLAT	4440432	4433132	9606.ENSP00000333203	9606.ENSP00000220809	0	0	0	0	0.082	0.376	0	0.473	0.671
SCNN1A	SLC26A4	4442340	4435634	9606.ENSP00000353292	9606.ENSP00000265715	0	0	0	0	0.061	0	0	0.664	0.671
LAPTM5	FCER1G	4437079	4436828	9606.ENSP00000294507	9606.ENSP00000289902	0	0	0	0	0.575	0.185	0	0.127	0.671
PROM1	EGFR	4449376	4436186	9606.ENSP00000426809	9606.ENSP00000275493	0	0	0	0	0	0	0	0.671	0.671
PDE1A	ENPP3	4448547	4448408	9606.ENSP00000410309	9606.ENSP00000406261	0	0	0	0	0.062	0	0.65	0.078	0.671
GLDC	PSAT1	4445533	4444751	9606.ENSP00000370737	9606.ENSP00000365773	0.084	0	0	0	0.117	0.05	0	0.621	0.67
TOP2A	ERBB2	4448614	4435897	9606.ENSP00000411532	9606.ENSP00000269571	0	0	0	0	0	0	0	0.67	0.67
LY86	TLR2	4445292	4434743	9606.ENSP00000369286	9606.ENSP00000260010	0	0	0	0	0.232	0.394	0	0.348	0.67
NUSAP1	EZH2	4450429	4439336	9606.ENSP00000453403	9606.ENSP00000320147	0	0	0	0	0.643	0	0	0.112	0.67
PAQR5	PRELID2	4446405	4440705	9606.ENSP00000378803	9606.ENSP00000335675	0	0	0	0	0	0	0	0.67	0.67
MYH10	SHROOM3	4442375	4437225	9606.ENSP00000353590	9606.ENSP00000296043	0	0	0	0	0.076	0.128	0	0.624	0.67
CASP1	GBP2	4449658	4443541	9606.ENSP00000433138	9606.ENSP00000359497	0	0	0	0	0.552	0	0	0.294	0.67
CD48	ITGB2	4451851	4446737	9606.ENSP00000484431	9606.ENSP00000380948	0	0	0	0	0.538	0	0	0.315	0.67
NCKAP1L	DOCK2	4437010	4434518	9606.ENSP00000293373	9606.ENSP00000256935	0	0	0	0	0.411	0.132	0	0.407	0.67
CD2	KIT	4443326	4436763	9606.ENSP00000358490	9606.ENSP00000288135	0	0	0	0	0	0	0	0.669	0.669
PARVG	ITGB2	4447700	4446737	9606.ENSP00000391583	9606.ENSP00000380948	0	0	0	0	0.567	0.194	0	0.128	0.669
KNG1	TRPA1	4435537	4435031	9606.ENSP00000265023	9606.ENSP00000262209	0	0	0	0	0	0	0	0.669	0.669
PTHLH	CASR	4450000	4449096	9606.ENSP00000441765	9606.ENSP00000420194	0	0	0	0	0	0	0	0.669	0.669
TMPRSS4	SLC26A4	4451257	4435634	9606.ENSP00000477949	9606.ENSP00000265715	0	0	0	0	0	0	0	0.669	0.669
PDE1A	ENPP1	4448547	4442442	9606.ENSP00000410309	9606.ENSP00000354238	0	0	0	0	0.062	0	0.65	0.069	0.668
RHBG	SLC26A4	4449979	4435634	9606.ENSP00000441197	9606.ENSP00000265715	0	0	0	0	0.063	0	0	0.66	0.668
LAPTM5	DOCK2	4437079	4434518	9606.ENSP00000294507	9606.ENSP00000256935	0	0	0	0	0.576	0	0	0.25	0.668
CCL18	C1QB	4451437	4438900	9606.ENSP00000479955	9606.ENSP00000313967	0	0	0	0	0.598	0	0	0.205	0.667
PTPN22	GPR65	4442291	4435771	9606.ENSP00000352833	9606.ENSP00000267549	0	0	0	0	0.667	0	0	0	0.667
SLC34A1	SLC9A3	4439443	4435520	9606.ENSP00000321424	9606.ENSP00000264938	0	0	0	0	0.063	0	0	0.659	0.667
NEDD4L	USP2	4446996	4434754	9606.ENSP00000383199	9606.ENSP00000260187	0	0	0	0	0.082	0.261	0	0.549	0.667
KCNJ1	NPHS2	4446057	4442926	9606.ENSP00000376432	9606.ENSP00000356587	0	0	0	0	0.521	0	0	0.334	0.667
TGFBI	COL1A1	4448825	4433346	9606.ENSP00000416330	9606.ENSP00000225964	0	0	0	0	0.23	0.32	0	0.414	0.666
PGF	ERBB4	4450339	4441238	9606.ENSP00000451040	9606.ENSP00000342235	0	0	0	0	0	0	0.6	0.201	0.666
TNFRSF9	CD86	4451323	4440320	9606.ENSP00000478699	9606.ENSP00000332049	0	0	0	0	0.059	0	0	0.659	0.666
SLC26A4	IYD	4435634	4433472	9606.ENSP00000265715	9606.ENSP00000229447	0	0	0	0	0.055	0	0	0.66	0.665
MMP9	VCAN	4443919	4435552	9606.ENSP00000361405	9606.ENSP00000265077	0	0	0	0	0	0.379	0	0.483	0.665
TBXAS1	ALOX5	4447607	4444382	9606.ENSP00000389414	9606.ENSP00000363512	0	0	0	0	0.12	0	0	0.635	0.665
CAV1	KCNMA1	4440933	4436684	9606.ENSP00000339191	9606.ENSP00000286628	0	0	0	0	0.08	0.305	0	0.518	0.665
CD163	FCGR2A	4442211	4435978	9606.ENSP00000352071	9606.ENSP00000271450	0	0	0	0	0.316	0	0	0.53	0.665
ALB	GSTM3	4437206	4434500	9606.ENSP00000295897	9606.ENSP00000256594	0	0	0	0	0.051	0	0	0.661	0.664
CXCR4	ICAM1	4447439	4435501	9606.ENSP00000386884	9606.ENSP00000264832	0	0	0	0	0.061	0	0	0.656	0.664
MUC1	CCND1	4451890	4433391	9606.ENSP00000484824	9606.ENSP00000227507	0	0	0	0	0.076	0	0	0.651	0.664
FN1	CCND1	4441661	4433391	9606.ENSP00000346839	9606.ENSP00000227507	0	0	0	0	0.183	0	0	0.606	0.664
ALDH6A1	BDH1	4450308	4446014	9606.ENSP00000450436	9606.ENSP00000376184	0	0	0	0	0.624	0	0	0.14	0.663
NPHS2	ALB	4442926	4437206	9606.ENSP00000356587	9606.ENSP00000295897	0	0	0	0	0	0	0	0.663	0.663
FGFR2	NEDD4L	4448546	4446996	9606.ENSP00000410294	9606.ENSP00000383199	0	0	0	0	0	0.189	0.6	0.045	0.663
MAL2	PIGR	4451417	4441870	9606.ENSP00000479708	9606.ENSP00000348888	0	0	0	0	0.062	0	0	0.656	0.663
TGFA	KIT	4437149	4436763	9606.ENSP00000295400	9606.ENSP00000288135	0	0	0	0	0	0	0.6	0.193	0.663
KRT7	EGFR	4440087	4436186	9606.ENSP00000329243	9606.ENSP00000275493	0	0	0	0	0.185	0.079	0	0.587	0.663
DNASE1	ALB	4447287	4437206	9606.ENSP00000385905	9606.ENSP00000295897	0	0	0	0	0	0	0	0.662	0.662
ABCB1	SLC22A8	4451279	4440777	9606.ENSP00000478255	9606.ENSP00000337335	0	0.002	0	0	0.055	0.052	0	0.653	0.662
LCP1	LAPTM5	4446831	4437079	9606.ENSP00000381581	9606.ENSP00000294507	0	0	0	0	0.645	0	0	0.085	0.662
MKI67	ERBB2	4443142	4435897	9606.ENSP00000357643	9606.ENSP00000269571	0	0	0	0	0.059	0	0	0.655	0.661
C3AR1	PLEK	4437821	4433624	9606.ENSP00000302079	9606.ENSP00000234313	0	0	0	0	0.661	0	0	0	0.661
FGFR2	KL	4448546	4445327	9606.ENSP00000410294	9606.ENSP00000369442	0	0	0	0	0	0.269	0	0.556	0.661
CD2	CD86	4443326	4440320	9606.ENSP00000358490	9606.ENSP00000332049	0	0	0	0	0.266	0	0	0.557	0.661
OSMR	EGF	4436121	4435570	9606.ENSP00000274276	9606.ENSP00000265171	0	0	0	0	0	0	0.6	0.188	0.661
CYBB	TLR2	4445083	4434743	9606.ENSP00000367851	9606.ENSP00000260010	0	0	0	0	0.247	0.096	0	0.541	0.661
TGFA	PDGFRA	4437149	4434540	9606.ENSP00000295400	9606.ENSP00000257290	0	0	0	0	0	0	0.6	0.187	0.66
ABCG1	CAV1	4442587	4440933	9606.ENSP00000354995	9606.ENSP00000339191	0	0	0	0	0	0	0	0.66	0.66
TREM2	MS4A4A	4444111	4440887	9606.ENSP00000362205	9606.ENSP00000338648	0	0	0	0	0.335	0	0	0.511	0.66
KCNJ1	AQP2	4446057	4432767	9606.ENSP00000376432	9606.ENSP00000199280	0	0	0	0	0.06	0	0	0.652	0.659
EGFR	TLR2	4436186	4434743	9606.ENSP00000275493	9606.ENSP00000260010	0	0	0	0	0	0.417	0	0.44	0.659
CSF1R	TLR2	4436666	4434743	9606.ENSP00000286301	9606.ENSP00000260010	0	0	0	0	0.347	0.089	0	0.473	0.659
CTSS	FCER1G	4443237	4436828	9606.ENSP00000357981	9606.ENSP00000289902	0	0	0	0	0.54	0	0	0.287	0.658
PLOD2	LOX	4436514	4433517	9606.ENSP00000282903	9606.ENSP00000231004	0	0	0	0	0.229	0	0	0.575	0.658
VEGFA	ALOX5	4451310	4444382	9606.ENSP00000478570	9606.ENSP00000363512	0	0	0	0	0	0	0	0.658	0.658
GLDC	AGMAT	4445533	4444634	9606.ENSP00000370737	9606.ENSP00000364986	0	0	0	0	0.097	0	0	0.636	0.658
PRKCDBP	EHD2	4438313	4435232	9606.ENSP00000307292	9606.ENSP00000263277	0	0	0	0	0.226	0	0	0.577	0.658
WT1	CCND1	4440250	4433391	9606.ENSP00000331327	9606.ENSP00000227507	0	0	0	0	0	0.05	0	0.655	0.658
RAP1GAP	RAPGEF3	4449696	4447902	9606.ENSP00000434033	9606.ENSP00000395708	0	0	0	0	0.088	0	0	0.64	0.657
PDE1A	ENTPD1	4448547	4443695	9606.ENSP00000410309	9606.ENSP00000360250	0	0	0	0	0.062	0	0.65	0	0.657
MYO1F	PLEK	4441469	4433624	9606.ENSP00000344871	9606.ENSP00000234313	0	0	0	0	0.592	0	0	0.195	0.657
SLA	ITGB2	4447831	4446737	9606.ENSP00000394049	9606.ENSP00000380948	0	0	0	0	0.657	0	0	0	0.657
ITGB2	TLR7	4446737	4445433	9606.ENSP00000380948	9606.ENSP00000370034	0	0	0	0	0.54	0.062	0	0.267	0.656
AIF1L	MYH10	4443915	4442375	9606.ENSP00000361383	9606.ENSP00000353590	0	0	0	0	0.099	0.579	0	0.168	0.656
PTPN22	LCP2	4442291	4432628	9606.ENSP00000352833	9606.ENSP00000046794	0	0	0	0	0.581	0	0	0.214	0.656
IGFBP3	MMP9	4445494	4443919	9606.ENSP00000370473	9606.ENSP00000361405	0	0	0	0	0	0	0	0.655	0.656
CAV1	ICAM1	4440933	4435501	9606.ENSP00000339191	9606.ENSP00000264832	0	0	0	0	0	0	0	0.656	0.656
GPHN	PVALB	4448937	4432927	9606.ENSP00000417901	9606.ENSP00000216200	0	0	0	0	0	0	0	0.656	0.656
MS4A4A	TYROBP	4440887	4435115	9606.ENSP00000338648	9606.ENSP00000262629	0	0	0	0	0.521	0	0	0.31	0.655
CD53	TYROBP	4435973	4435115	9606.ENSP00000271324	9606.ENSP00000262629	0	0	0	0	0.563	0	0	0.244	0.655
PGF	PTGER3	4450339	4441881	9606.ENSP00000451040	9606.ENSP00000349003	0	0	0	0	0	0	0	0.655	0.655
SLC12A3	CLDN16	4448218	4435489	9606.ENSP00000402152	9606.ENSP00000264734	0	0	0	0	0.061	0	0	0.648	0.655
MMP9	FLT1	4443919	4436489	9606.ENSP00000361405	9606.ENSP00000282397	0	0	0	0	0.061	0	0	0.646	0.654
EZH2	TPX2	4439336	4437665	9606.ENSP00000320147	9606.ENSP00000300403	0	0	0	0	0.627	0	0	0.111	0.654
SLA	CD53	4447831	4435973	9606.ENSP00000394049	9606.ENSP00000271324	0	0	0	0	0.654	0	0	0	0.654
CASP1	CTSS	4449658	4443237	9606.ENSP00000433138	9606.ENSP00000357981	0	0	0	0	0.593	0	0	0.183	0.654
CASR	KCNJ1	4449096	4446057	9606.ENSP00000420194	9606.ENSP00000376432	0	0	0	0	0.061	0	0	0.647	0.654
LAPTM5	LCP2	4437079	4432628	9606.ENSP00000294507	9606.ENSP00000046794	0	0	0	0	0.593	0	0	0.186	0.654
VTCN1	CD86	4443321	4440320	9606.ENSP00000358470	9606.ENSP00000332049	0	0	0	0	0	0	0	0.653	0.653
FHIT	CCND1	4448899	4433391	9606.ENSP00000417480	9606.ENSP00000227507	0	0	0	0	0	0	0	0.653	0.653
C1QA	LAPTM5	4444428	4437079	9606.ENSP00000363773	9606.ENSP00000294507	0	0	0	0	0.485	0	0	0.353	0.653
NTNG1	GPM6B	4443452	4439087	9606.ENSP00000359085	9606.ENSP00000316861	0	0	0	0	0.076	0	0	0.64	0.653
HSPA2	MAPK10	4446310	4442217	9606.ENSP00000378199	9606.ENSP00000352157	0	0	0	0	0.076	0.051	0.6	0.127	0.652
C1QC	LAPTM5	4444427	4437079	9606.ENSP00000363770	9606.ENSP00000294507	0	0	0	0	0.485	0	0	0.353	0.652
ITGAX	IDO1	4450468	4449569	9606.ENSP00000454623	9606.ENSP00000430950	0	0	0	0	0.065	0	0	0.643	0.652
ANXA4	GP2	4446258	4445540	9606.ENSP00000377833	9606.ENSP00000370767	0	0	0	0	0	0.379	0	0.462	0.651
CALU	HEPACAM2	4449856	4447648	9606.ENSP00000438248	9606.ENSP00000390204	0	0	0	0	0	0	0	0.65	0.65
BRCA2	EGFR	4445332	4436186	9606.ENSP00000369497	9606.ENSP00000275493	0	0	0	0	0	0	0	0.65	0.65
EZH2	PLOD2	4439336	4436514	9606.ENSP00000320147	9606.ENSP00000282903	0	0	0	0	0	0	0.65	0	0.65
PIEZO2	TRPA1	4449172	4435031	9606.ENSP00000421377	9606.ENSP00000262209	0	0	0	0	0.061	0	0	0.643	0.65
PPAPDC1A	CEL	4446797	4443875	9606.ENSP00000381302	9606.ENSP00000361151	0	0	0	0	0	0	0.65	0	0.65
KCNJ1	KCNMA1	4446057	4436684	9606.ENSP00000376432	9606.ENSP00000286628	0	0	0	0	0	0	0	0.649	0.649
CAV1	EHD2	4440933	4435232	9606.ENSP00000339191	9606.ENSP00000263277	0	0	0	0	0.301	0	0	0.518	0.649
RGS1	PLEK	4442888	4433624	9606.ENSP00000356429	9606.ENSP00000234313	0	0	0	0	0.565	0	0	0.227	0.649
FN1	PTPRO	4441661	4436417	9606.ENSP00000346839	9606.ENSP00000281171	0	0	0	0	0	0.29	0	0.527	0.649
SLC22A6	SLC7A13	4444960	4437413	9606.ENSP00000367102	9606.ENSP00000297524	0	0	0	0	0.077	0.131	0	0.597	0.649
MSR1	SCARB1	4435004	4434927	9606.ENSP00000262101	9606.ENSP00000261693	0	0	0	0	0.061	0	0	0.642	0.649
XPNPEP2	KNG1	4443668	4435537	9606.ENSP00000360147	9606.ENSP00000265023	0	0	0	0	0.063	0	0	0.641	0.649
LCP1	SCIN	4446831	4437359	9606.ENSP00000381581	9606.ENSP00000297029	0	0	0	0	0.062	0	0.54	0.253	0.649
SLC9A9	C3orf58	4439348	4439329	9606.ENSP00000320246	9606.ENSP00000320081	0	0	0	0	0	0	0	0.649	0.649
EZH2	EPCAM	4439336	4435308	9606.ENSP00000320147	9606.ENSP00000263735	0	0	0	0	0.059	0	0	0.641	0.648
CCL5	NKG7	4451102	4433194	9606.ENSP00000474412	9606.ENSP00000221978	0	0	0	0	0.573	0	0	0.208	0.648
CD2	NKG7	4443326	4433194	9606.ENSP00000358490	9606.ENSP00000221978	0	0	0	0	0.564	0	0	0.225	0.648
TMEM207	TMEM174	4441675	4437333	9606.ENSP00000346981	9606.ENSP00000296776	0	0	0	0	0.158	0	0	0.599	0.648
NOS1	PVALB	4451263	4432927	9606.ENSP00000477999	9606.ENSP00000216200	0	0	0	0	0.062	0.308	0	0.501	0.648
CYP2B6	ALB	4439703	4437206	9606.ENSP00000324648	9606.ENSP00000295897	0	0	0	0	0.064	0	0	0.64	0.648
PBX1	HOXA7	4448380	4433811	9606.ENSP00000405890	9606.ENSP00000242159	0	0	0	0	0	0.317	0	0.505	0.647
CD48	LCP2	4451851	4432628	9606.ENSP00000484431	9606.ENSP00000046794	0	0	0	0	0.539	0	0	0.266	0.647
SLC2A1	SLC5A2	4448824	4439964	9606.ENSP00000416293	9606.ENSP00000327943	0	0	0	0	0.061	0	0	0.64	0.647
GPD1L	KCNE4	4436498	4436449	9606.ENSP00000282541	9606.ENSP00000281830	0	0	0	0	0	0	0	0.647	0.647
FCER1G	IGSF6	4436828	4435822	9606.ENSP00000289902	9606.ENSP00000268389	0	0	0	0	0.569	0	0	0.212	0.646
PSAT1	ASS1	4444751	4443929	9606.ENSP00000365773	9606.ENSP00000361471	0.154	0	0	0	0.131	0	0	0.557	0.646
BDH1	HMGCS2	4446014	4443311	9606.ENSP00000376184	9606.ENSP00000358414	0	0	0	0	0.062	0	0	0.638	0.646
PROZ	HRG	4441427	4433552	9606.ENSP00000344458	9606.ENSP00000232003	0	0	0	0	0.646	0	0	0	0.646
ABCA1	TLR2	4444444	4434743	9606.ENSP00000363868	9606.ENSP00000260010	0	0	0	0	0.084	0.05	0	0.625	0.646
C3AR1	TYROBP	4437821	4435115	9606.ENSP00000302079	9606.ENSP00000262629	0	0	0	0	0.568	0	0	0.213	0.646
SLC12A3	SLC26A4	4448218	4435634	9606.ENSP00000402152	9606.ENSP00000265715	0.042	0	0	0	0	0	0	0.646	0.646
THEMIS2	LAPTM5	4444288	4437079	9606.ENSP00000363031	9606.ENSP00000294507	0	0	0	0	0.558	0	0	0.23	0.645
CLCN5	SLC9A3	4444675	4435520	9606.ENSP00000365256	9606.ENSP00000264938	0.05	0	0	0	0.062	0	0	0.633	0.645
NR3C2	CAV1	4442077	4440933	9606.ENSP00000350815	9606.ENSP00000339191	0	0	0	0	0	0.328	0	0.493	0.645
PTPRC	TYROBP	4448605	4435115	9606.ENSP00000411355	9606.ENSP00000262629	0	0	0	0	0.425	0	0	0.405	0.644
CCL18	C1QC	4451437	4444427	9606.ENSP00000479955	9606.ENSP00000363770	0	0	0	0	0.58	0	0	0.187	0.644
SLC12A3	TRPM6	4448218	4442420	9606.ENSP00000402152	9606.ENSP00000354006	0	0	0	0	0	0	0	0.644	0.644
MKI67	CDCA2	4443142	4439997	9606.ENSP00000357643	9606.ENSP00000328228	0	0	0	0.541	0.613	0	0	0.21	0.644
CD2	TYROBP	4443326	4435115	9606.ENSP00000358490	9606.ENSP00000262629	0	0	0	0	0.538	0	0	0.259	0.643
EGFR	OSMR	4436186	4436121	9606.ENSP00000275493	9606.ENSP00000274276	0	0	0	0	0.214	0.472	0	0.21	0.643
PTPRC	LCP1	4448605	4446831	9606.ENSP00000411355	9606.ENSP00000381581	0	0	0	0	0.585	0.05	0	0.166	0.643
PLA2G7	MSR1	4436162	4435004	9606.ENSP00000274793	9606.ENSP00000262101	0	0	0	0	0.164	0	0.54	0.144	0.642
VEGFA	PTGER3	4451310	4441881	9606.ENSP00000478570	9606.ENSP00000349003	0	0	0	0	0	0	0	0.642	0.642
F11	HRG	4447185	4433552	9606.ENSP00000384957	9606.ENSP00000232003	0	0	0	0	0.461	0	0	0.363	0.642
CD300A	NR0B2	4442338	4434348	9606.ENSP00000353259	9606.ENSP00000254227	0	0	0	0	0	0.268	0	0.532	0.642
TGFA	CSF1R	4437149	4436666	9606.ENSP00000295400	9606.ENSP00000286301	0	0	0	0	0	0	0.6	0.144	0.642
SLC16A1	SLC2A1	4449975	4448824	9606.ENSP00000441065	9606.ENSP00000416293	0	0	0	0	0.097	0	0	0.62	0.642
LOXL2	PLOD2	4445831	4436514	9606.ENSP00000373783	9606.ENSP00000282903	0	0	0	0	0.167	0	0	0.588	0.642
PTPRC	CYBB	4448605	4445083	9606.ENSP00000411355	9606.ENSP00000367851	0	0	0	0	0.466	0	0	0.357	0.642
PIK3CG	LCP2	4442215	4432628	9606.ENSP00000352121	9606.ENSP00000046794	0	0	0	0	0.349	0	0	0.473	0.642
NPNT	FREM2	4447597	4436379	9606.ENSP00000389252	9606.ENSP00000280481	0	0	0	0	0.071	0.064	0	0.619	0.641
CYBB	CD86	4445083	4440320	9606.ENSP00000367851	9606.ENSP00000332049	0	0	0	0	0.54	0	0	0.251	0.641
IDO1	CCL20	4449569	4442174	9606.ENSP00000430950	9606.ENSP00000351671	0	0	0	0	0.077	0	0	0.627	0.641
MB21D1	TLR3	4443500	4437339	9606.ENSP00000359339	9606.ENSP00000296795	0	0	0	0	0	0	0	0.641	0.641
ANK2	CHL1	4441946	4434493	9606.ENSP00000349588	9606.ENSP00000256509	0	0	0	0	0.217	0.412	0	0.279	0.64
FHIT	CDH13	4448899	4435831	9606.ENSP00000417480	9606.ENSP00000268613	0	0	0	0	0	0	0	0.64	0.64
PROM1	FN1	4449376	4441661	9606.ENSP00000426809	9606.ENSP00000346839	0	0	0	0	0	0	0	0.64	0.64
CCL5	CYBB	4451102	4445083	9606.ENSP00000474412	9606.ENSP00000367851	0	0	0	0	0.118	0	0	0.608	0.64
THEMIS2	LCP2	4444288	4432628	9606.ENSP00000363031	9606.ENSP00000046794	0	0	0	0	0.389	0.332	0	0.188	0.64
KCNJ1	SLC9A3	4446057	4435520	9606.ENSP00000376432	9606.ENSP00000264938	0	0	0	0	0	0	0	0.64	0.64
IGSF6	GPR65	4435822	4435771	9606.ENSP00000268389	9606.ENSP00000267549	0	0	0	0	0.64	0	0	0	0.64
NETO2	NCK1	4450495	4448885	9606.ENSP00000455169	9606.ENSP00000417273	0	0	0	0	0	0	0	0.64	0.64
NRP2	PLXNC1	4442374	4434641	9606.ENSP00000353582	9606.ENSP00000258526	0	0	0	0	0	0.169	0	0.584	0.639
IGSF6	TLR2	4435822	4434743	9606.ENSP00000268389	9606.ENSP00000260010	0	0	0	0	0.618	0	0	0.093	0.639
PPARGC1A	PCK2	4435507	4432982	9606.ENSP00000264867	9606.ENSP00000216780	0	0	0	0	0.049	0	0	0.635	0.638
L1CAM	ERBB2	4443451	4435897	9606.ENSP00000359077	9606.ENSP00000269571	0	0	0	0	0.06	0.472	0	0.329	0.638
C1orf162	FCER1G	4441401	4436828	9606.ENSP00000344218	9606.ENSP00000289902	0	0	0	0	0.638	0	0	0	0.638
SLC2A1	SLC16A7	4448824	4434831	9606.ENSP00000416293	9606.ENSP00000261187	0	0	0	0	0.055	0	0	0.633	0.638
ITGB2	CD86	4446737	4440320	9606.ENSP00000380948	9606.ENSP00000332049	0	0	0	0	0.432	0	0	0.39	0.638
ITGAX	CD2	4450468	4443326	9606.ENSP00000454623	9606.ENSP00000358490	0	0	0	0	0.161	0	0	0.587	0.638
EGFR	IGFBP2	4436186	4433603	9606.ENSP00000275493	9606.ENSP00000233809	0	0	0	0	0	0.379	0	0.441	0.638
PROM1	ALB	4449376	4437206	9606.ENSP00000426809	9606.ENSP00000295897	0	0	0	0	0	0	0	0.637	0.637
C1QA	SLAMF8	4444428	4436821	9606.ENSP00000363773	9606.ENSP00000289707	0	0	0	0	0.637	0	0	0	0.637
CSF1R	LCP2	4436666	4432628	9606.ENSP00000286301	9606.ENSP00000046794	0	0	0	0	0.544	0	0	0.237	0.637
PDGFRA	DCN	4434540	4432629	9606.ENSP00000257290	9606.ENSP00000052754	0	0	0	0	0.545	0.125	0	0.162	0.637
GLDC	MYOF	4445533	4442225	9606.ENSP00000370737	9606.ENSP00000352208	0	0	0	0	0	0	0	0.637	0.637
ALB	ATP12A	4437206	4433055	9606.ENSP00000295897	9606.ENSP00000218548	0	0	0	0	0.061	0	0	0.63	0.637
KLHL6	LCP2	4441142	4432628	9606.ENSP00000341342	9606.ENSP00000046794	0	0	0	0	0.606	0	0	0.113	0.636
ALB	CCND1	4437206	4433391	9606.ENSP00000295897	9606.ENSP00000227507	0	0	0	0	0	0	0	0.636	0.636
SLIT2	SEMA5B	4449223	4447616	9606.ENSP00000422591	9606.ENSP00000389588	0	0	0	0	0.083	0	0	0.619	0.636
ITGA5	ICAM1	4437011	4435501	9606.ENSP00000293379	9606.ENSP00000264832	0	0	0	0	0.088	0.17	0	0.558	0.636
ENO2	KIT	4449816	4436763	9606.ENSP00000437402	9606.ENSP00000288135	0	0	0	0	0	0	0	0.635	0.635
CXCR4	ALB	4447439	4437206	9606.ENSP00000386884	9606.ENSP00000295897	0	0	0	0	0	0	0	0.635	0.635
CD48	GMFG	4451851	4451021	9606.ENSP00000484431	9606.ENSP00000472249	0	0	0	0	0.617	0	0	0.084	0.635
VSNL1	PLCXD3	4447156	4444947	9606.ENSP00000384719	9606.ENSP00000367032	0	0	0	0	0.119	0	0	0.603	0.635
SCNN1A	SLC9A3	4442340	4435520	9606.ENSP00000353292	9606.ENSP00000264938	0	0	0	0	0	0	0	0.634	0.634
NOS1	CALB1	4451263	4435604	9606.ENSP00000477999	9606.ENSP00000265431	0	0	0	0	0.061	0.308	0	0.483	0.634
BRCA2	TOX3	4445332	4433101	9606.ENSP00000369497	9606.ENSP00000219746	0	0	0	0	0.052	0	0	0.63	0.634
MYH10	CALB1	4442375	4435604	9606.ENSP00000353590	9606.ENSP00000265431	0	0	0	0	0	0.579	0	0.168	0.634
CD48	CD86	4451851	4440320	9606.ENSP00000484431	9606.ENSP00000332049	0	0	0	0	0.393	0	0	0.422	0.634
C1orf162	IGSF6	4441401	4435822	9606.ENSP00000344218	9606.ENSP00000268389	0	0	0	0	0.634	0	0	0	0.634
HCK	THEMIS2	4450141	4444288	9606.ENSP00000444986	9606.ENSP00000363031	0	0	0	0	0.539	0	0	0.237	0.634
VEGFA	TNFAIP6	4451310	4433852	9606.ENSP00000478570	9606.ENSP00000243347	0	0	0	0	0	0	0	0.634	0.634
GLDC	PHGDH	4445533	4443312	9606.ENSP00000370737	9606.ENSP00000358417	0.077	0	0	0	0.097	0	0	0.595	0.633
KCNJ1	RHCG	4446057	4435805	9606.ENSP00000376432	9606.ENSP00000268122	0	0	0	0	0.51	0	0	0.283	0.633
HCK	CSF1R	4450141	4436666	9606.ENSP00000444986	9606.ENSP00000286301	0	0	0	0.713	0.567	0.096	0	0.378	0.633
SLC12A3	SCNN1A	4448218	4442340	9606.ENSP00000402152	9606.ENSP00000353292	0	0	0	0	0.056	0	0	0.627	0.633
ENTPD1	P2RX7	4443695	4440203	9606.ENSP00000360250	9606.ENSP00000330696	0	0	0	0	0.088	0	0	0.613	0.632
ITGB2	EVI2B	4446737	4440484	9606.ENSP00000380948	9606.ENSP00000333779	0	0	0	0	0.561	0	0	0.194	0.632
PLEK	FERMT1	4433624	4433012	9606.ENSP00000234313	9606.ENSP00000217289	0	0	0	0	0.061	0	0	0.624	0.632
FANCI	ATAD2	4438638	4436722	9606.ENSP00000310842	9606.ENSP00000287394	0	0	0	0	0.632	0	0	0	0.632
TYMS	EGFR	4439011	4436186	9606.ENSP00000315644	9606.ENSP00000275493	0	0	0	0	0	0	0	0.632	0.632
KL	CYBB	4445327	4445083	9606.ENSP00000369442	9606.ENSP00000367851	0	0	0	0	0.067	0	0	0.621	0.632
TLR7	PLEK	4445433	4433624	9606.ENSP00000370034	9606.ENSP00000234313	0	0	0	0	0.587	0	0	0.146	0.632
PARVG	ITGA5	4447700	4437011	9606.ENSP00000391583	9606.ENSP00000293379	0	0	0	0	0	0	0.6	0.116	0.631
NNMT	IGF2BP2	4449990	4445662	9606.ENSP00000441434	9606.ENSP00000371634	0	0	0	0	0.626	0	0	0.055	0.631
PTPRC	APBB1IP	4448605	4444696	9606.ENSP00000411355	9606.ENSP00000365411	0	0	0	0	0.488	0.261	0	0.102	0.631
ITGAX	ALB	4450468	4437206	9606.ENSP00000454623	9606.ENSP00000295897	0	0	0	0	0	0	0	0.63	0.63
PHGDH	TYMS	4443312	4439011	9606.ENSP00000358417	9606.ENSP00000315644	0.163	0	0	0	0.109	0.406	0	0.265	0.63
SLC7A8	SLC1A3	4439361	4435561	9606.ENSP00000320378	9606.ENSP00000265113	0	0	0	0	0.062	0.085	0	0.604	0.63
COLGALT1	PYGL	4434239	4432954	9606.ENSP00000252599	9606.ENSP00000216392	0	0	0	0	0.065	0.384	0	0.408	0.629
FGFR2	SH3GL2	4448546	4445424	9606.ENSP00000410294	9606.ENSP00000369981	0	0	0	0	0.088	0	0.6	0.067	0.629
ITGB2	APBB1IP	4446737	4444696	9606.ENSP00000380948	9606.ENSP00000365411	0	0	0	0	0.5	0	0	0.287	0.628
CCL18	C1QA	4451437	4444428	9606.ENSP00000479955	9606.ENSP00000363773	0	0	0	0	0.594	0	0	0.121	0.628
ALDH4A1	ASS1	4444540	4443929	9606.ENSP00000364490	9606.ENSP00000361471	0	0	0	0	0.076	0.079	0	0.599	0.628
SLC12A1	SLC26A4	4446564	4435634	9606.ENSP00000379822	9606.ENSP00000265715	0.042	0	0	0	0.062	0	0	0.618	0.627
PTPRC	MKI67	4448605	4443142	9606.ENSP00000411355	9606.ENSP00000357643	0	0	0	0	0.062	0	0	0.618	0.627
NEDD4L	PDGFRA	4446996	4434540	9606.ENSP00000383199	9606.ENSP00000257290	0	0	0	0	0.049	0.09	0.6	0.05	0.627
IGSF6	LCP2	4435822	4432628	9606.ENSP00000268389	9606.ENSP00000046794	0	0	0	0	0.627	0	0	0	0.627
HMGCS2	PCK1	4443311	4439313	9606.ENSP00000358414	9606.ENSP00000319814	0	0	0	0	0.187	0	0	0.559	0.627
TLR2	SERPINE1	4434743	4433266	9606.ENSP00000260010	9606.ENSP00000223095	0	0	0	0	0.061	0	0	0.619	0.627
PKHD1	PLXNB1	4443672	4442133	9606.ENSP00000360158	9606.ENSP00000351338	0	0	0	0	0	0	0	0.627	0.627
FANCI	ANLN	4438638	4435644	9606.ENSP00000310842	9606.ENSP00000265748	0	0	0	0	0.616	0	0	0.065	0.626
UMOD	SLC22A12	4446508	4444903	9606.ENSP00000379438	9606.ENSP00000366797	0	0	0	0	0.196	0	0	0.554	0.626
BIRC3	CTSH	4435265	4433111	9606.ENSP00000263464	9606.ENSP00000220166	0	0	0	0	0.082	0	0.6	0.064	0.626
SMIM5	TMEM52B	4451189	4445622	9606.ENSP00000477017	9606.ENSP00000371348	0	0	0	0	0	0	0	0.626	0.626
PIK3C2G	RERGL	4450156	4433443	9606.ENSP00000445381	9606.ENSP00000229002	0	0	0	0	0	0.185	0	0.56	0.626
PLG	ICAM1	4438461	4435501	9606.ENSP00000308938	9606.ENSP00000264832	0	0	0	0	0	0	0	0.626	0.626
GATA3	ELF5	4445191	4438649	9606.ENSP00000368632	9606.ENSP00000311010	0	0	0	0	0.063	0	0	0.618	0.626
CXCR4	CD86	4447439	4440320	9606.ENSP00000386884	9606.ENSP00000332049	0	0	0	0	0.137	0	0	0.584	0.626
CCL20	ICAM1	4442174	4435501	9606.ENSP00000351671	9606.ENSP00000264832	0	0	0	0	0.195	0	0	0.554	0.626
CYBB	PLEK	4445083	4433624	9606.ENSP00000367851	9606.ENSP00000234313	0	0	0	0	0.584	0	0	0.136	0.625
APBB1IP	PLEK	4444696	4433624	9606.ENSP00000365411	9606.ENSP00000234313	0	0	0	0	0.349	0	0	0.448	0.625
ATAD2	ANLN	4436722	4435644	9606.ENSP00000287394	9606.ENSP00000265748	0	0	0	0	0.568	0	0	0.167	0.625
PIGR	FCGR2A	4441870	4435978	9606.ENSP00000348888	9606.ENSP00000271450	0	0	0	0	0.049	0	0	0.622	0.625
AGMAT	PYGL	4444634	4432954	9606.ENSP00000364986	9606.ENSP00000216392	0.056	0	0	0	0.062	0	0	0.61	0.625
TGFA	CCND1	4437149	4433391	9606.ENSP00000295400	9606.ENSP00000227507	0	0	0	0	0	0	0	0.625	0.625
ABCC1	ABCG1	4446918	4442587	9606.ENSP00000382342	9606.ENSP00000354995	0	0	0	0	0.062	0.091	0	0.594	0.624
PDE1A	MKI67	4448547	4443142	9606.ENSP00000410309	9606.ENSP00000357643	0	0	0	0	0	0	0	0.623	0.623
PTPRC	PTPN22	4448605	4442291	9606.ENSP00000411355	9606.ENSP00000352833	0	0	0	0.637	0.55	0.063	0	0.417	0.623
TLR7	IGSF6	4445433	4435822	9606.ENSP00000370034	9606.ENSP00000268389	0	0	0	0	0.622	0	0	0	0.622
KCNMA1	PAG1	4436684	4433123	9606.ENSP00000286628	9606.ENSP00000220597	0	0	0	0	0	0	0	0.622	0.622
MMP9	TGM2	4443919	4442654	9606.ENSP00000361405	9606.ENSP00000355330	0	0	0	0	0.061	0	0	0.614	0.622
ERBB4	ANGPT2	4441238	4438957	9606.ENSP00000342235	9606.ENSP00000314897	0	0	0	0	0.049	0	0.6	0.088	0.622
CDCA2	TPX2	4439997	4437665	9606.ENSP00000328228	9606.ENSP00000300403	0	0	0	0	0.597	0	0	0.101	0.622
GABRA2	GABARAPL1	4449188	4435700	9606.ENSP00000421828	9606.ENSP00000266458	0	0	0	0	0	0.053	0.6	0.084	0.622
SERPINA5	PLG	4440432	4438461	9606.ENSP00000333203	9606.ENSP00000308938	0	0	0	0	0.129	0.129	0	0.542	0.622
TLR7	C1QB	4445433	4438900	9606.ENSP00000370034	9606.ENSP00000313967	0	0	0	0	0.507	0	0	0.265	0.622
CTSS	PLEK	4443237	4433624	9606.ENSP00000357981	9606.ENSP00000234313	0	0	0	0	0.608	0	0	0.073	0.621
MAPK10	CCND1	4442217	4433391	9606.ENSP00000352157	9606.ENSP00000227507	0	0	0	0	0	0	0	0.621	0.621
NCKAP1L	CD53	4437010	4435973	9606.ENSP00000293373	9606.ENSP00000271324	0	0	0	0	0.552	0	0	0.189	0.621
LCP1	PLEK	4446831	4433624	9606.ENSP00000381581	9606.ENSP00000234313	0	0	0	0	0.584	0	0	0.126	0.621
ALB	TLR2	4437206	4434743	9606.ENSP00000295897	9606.ENSP00000260010	0	0	0	0	0	0	0	0.621	0.621
ABCA1	MMP9	4444444	4443919	9606.ENSP00000363868	9606.ENSP00000361405	0	0	0	0	0.061	0	0	0.613	0.621
CYP17A1	FMO5	4443418	4434341	9606.ENSP00000358903	9606.ENSP00000254090	0.043	0	0	0	0.062	0.127	0	0.572	0.62
RGN	SORD	4446652	4435781	9606.ENSP00000380365	9606.ENSP00000267814	0.286	0	0	0	0.087	0	0	0.464	0.62
SLC22A8	SLC7A13	4440777	4437413	9606.ENSP00000337335	9606.ENSP00000297524	0	0	0	0	0.062	0.131	0	0.571	0.62
KCNJ1	TMEM207	4446057	4441675	9606.ENSP00000376432	9606.ENSP00000346981	0	0	0	0	0.512	0	0	0.254	0.62
SLC12A1	SLC34A1	4446564	4439443	9606.ENSP00000379822	9606.ENSP00000321424	0	0	0	0	0.13	0	0	0.581	0.62
VEGFA	BHLHE41	4451310	4433828	9606.ENSP00000478570	9606.ENSP00000242728	0	0	0	0	0	0	0	0.619	0.619
ALB	EPCAM	4437206	4435308	9606.ENSP00000295897	9606.ENSP00000263735	0	0	0	0	0	0	0	0.619	0.619
ICAM1	TIMP1	4435501	4433052	9606.ENSP00000264832	9606.ENSP00000218388	0	0	0	0	0.098	0	0	0.595	0.619
CD86	ALB	4440320	4437206	9606.ENSP00000332049	9606.ENSP00000295897	0	0	0	0	0	0	0	0.618	0.618
IDO1	PTPRC	4449569	4448605	9606.ENSP00000430950	9606.ENSP00000411355	0	0	0	0	0.08	0.098	0	0.576	0.618
TGM2	EGF	4442654	4435570	9606.ENSP00000355330	9606.ENSP00000265171	0	0	0	0	0	0	0	0.618	0.618
EVI2B	DOCK2	4440484	4434518	9606.ENSP00000333779	9606.ENSP00000256935	0	0	0	0	0.563	0	0	0.16	0.617
ITGB2	ALOX5	4446737	4444382	9606.ENSP00000380948	9606.ENSP00000363512	0	0	0	0	0.548	0	0	0.189	0.617
SLC22A7	ABCC3	4443974	4436623	9606.ENSP00000361666	9606.ENSP00000285238	0	0	0	0	0.062	0.052	0	0.604	0.617
CYP17A1	SCARB1	4443418	4434927	9606.ENSP00000358903	9606.ENSP00000261693	0	0	0	0	0	0	0	0.617	0.617
CDCA2	ANLN	4439997	4435644	9606.ENSP00000328228	9606.ENSP00000265748	0	0	0	0	0.566	0	0	0.15	0.616
TMEM72	SUSD2	4445863	4442102	9606.ENSP00000374234	9606.ENSP00000351075	0	0	0	0	0.077	0	0	0.601	0.616
PIK3C2G	PIK3CG	4450156	4442215	9606.ENSP00000445381	9606.ENSP00000352121	0	0	0	0.677	0.062	0	0.54	0.479	0.616
FN1	ERBB2	4441661	4435897	9606.ENSP00000346839	9606.ENSP00000269571	0	0	0	0	0.088	0	0	0.596	0.616
CD36	UMOD	4448068	4446508	9606.ENSP00000399421	9606.ENSP00000379438	0	0	0	0	0	0	0	0.616	0.616
XPNPEP2	PEPD	4443668	4433882	9606.ENSP00000360147	9606.ENSP00000244137	0	0	0	0	0.062	0	0	0.606	0.615
PTPRC	ITGA5	4448605	4437011	9606.ENSP00000411355	9606.ENSP00000293379	0	0	0	0	0.06	0.165	0	0.549	0.615
PTPRC	NCKAP1L	4448605	4437010	9606.ENSP00000411355	9606.ENSP00000293373	0	0	0	0	0.569	0.082	0	0.104	0.614
CA9	EGLN3	4445040	4434133	9606.ENSP00000367608	9606.ENSP00000250457	0	0	0	0	0.087	0	0	0.594	0.614
ALDOB	PYGL	4444463	4432954	9606.ENSP00000363988	9606.ENSP00000216392	0.05	0	0	0	0.181	0.071	0	0.529	0.614
CXCR4	ITGA4	4447439	4446627	9606.ENSP00000386884	9606.ENSP00000380227	0	0	0	0	0.094	0	0	0.59	0.613
PHKA2	PPP1R3B	4445291	4438400	9606.ENSP00000369274	9606.ENSP00000308318	0	0	0	0	0.056	0	0.6	0.058	0.613
PHKA2	PPP1R3C	4445291	4433728	9606.ENSP00000369274	9606.ENSP00000238994	0	0	0	0	0.057	0	0.6	0.057	0.613
MKI67	EGFR	4443142	4436186	9606.ENSP00000357643	9606.ENSP00000275493	0	0	0	0	0	0	0	0.613	0.613
ALDH6A1	ALDH4A1	4450308	4444540	9606.ENSP00000450436	9606.ENSP00000364490	0	0	0	0.58	0.11	0.403	0	0.728	0.613
TLR7	CYBB	4445433	4445083	9606.ENSP00000370034	9606.ENSP00000367851	0	0	0	0	0.321	0.096	0	0.42	0.613
FGF1	SERPINE1	4451524	4433266	9606.ENSP00000480791	9606.ENSP00000223095	0	0	0	0	0	0	0	0.613	0.613
KCNJ10	AQP2	4443029	4432767	9606.ENSP00000357068	9606.ENSP00000199280	0	0	0	0	0	0	0	0.613	0.613
EGFR	VCAN	4436186	4435552	9606.ENSP00000275493	9606.ENSP00000265077	0	0	0	0	0.049	0	0	0.609	0.612
ANK3	CHL1	4436396	4434493	9606.ENSP00000280772	9606.ENSP00000256509	0	0	0	0	0.116	0.445	0	0.272	0.612
ENO2	CHL1	4449816	4434493	9606.ENSP00000437402	9606.ENSP00000256509	0	0	0	0	0.098	0	0	0.588	0.612
SLC12A3	NPHS1	4448218	4445133	9606.ENSP00000402152	9606.ENSP00000368190	0	0	0	0	0	0	0	0.611	0.611
NPHS2	TMEM207	4442926	4441675	9606.ENSP00000356587	9606.ENSP00000346981	0	0	0	0	0.527	0	0	0.211	0.611
SLC22A6	SLC47A2	4444960	4439869	9606.ENSP00000367102	9606.ENSP00000326671	0	0	0	0	0.063	0	0	0.602	0.611
PTPRC	DNASE1	4448605	4447287	9606.ENSP00000411355	9606.ENSP00000385905	0	0	0	0	0	0	0	0.611	0.611
CD163	FCER1G	4442211	4436828	9606.ENSP00000352071	9606.ENSP00000289902	0	0	0	0	0.567	0	0	0.138	0.611
CA9	KRT7	4445040	4440087	9606.ENSP00000367608	9606.ENSP00000329243	0	0	0	0	0.098	0	0	0.586	0.61
ACSF2	ACAA1	4448199	4440473	9606.ENSP00000401831	9606.ENSP00000333664	0.071	0	0	0	0.097	0	0	0.572	0.61
GPR65	PLEK	4435771	4433624	9606.ENSP00000267549	9606.ENSP00000234313	0	0	0	0	0.604	0	0	0.055	0.61
CDCA2	TYMS	4439997	4439011	9606.ENSP00000328228	9606.ENSP00000315644	0	0	0	0	0.562	0	0	0.146	0.61
TOP2A	BRCA2	4448614	4445332	9606.ENSP00000411532	9606.ENSP00000369497	0	0	0	0	0.26	0.115	0	0.451	0.609
RAB25	EPCAM	4442453	4435308	9606.ENSP00000354376	9606.ENSP00000263735	0	0	0	0	0.535	0	0	0.193	0.609
NPHS1	CDH3	4445133	4435356	9606.ENSP00000368190	9606.ENSP00000264012	0	0	0	0	0.05	0.074	0	0.591	0.609
SLC7A8	SLC6A19	4439361	4438117	9606.ENSP00000320378	9606.ENSP00000305302	0	0	0	0	0.061	0	0	0.601	0.609
CCL18	CCL20	4451437	4442174	9606.ENSP00000479955	9606.ENSP00000351671	0	0	0	0	0.095	0	0	0.586	0.609
FGF1	FN1	4451524	4441661	9606.ENSP00000480791	9606.ENSP00000346839	0	0	0	0	0.076	0	0	0.595	0.609
SLC6A19	SLC1A3	4438117	4435561	9606.ENSP00000305302	9606.ENSP00000265113	0.046	0	0	0	0.054	0	0	0.601	0.609
CXCR4	MET	4447439	4439114	9606.ENSP00000386884	9606.ENSP00000317272	0	0	0	0	0	0.072	0	0.596	0.609
FYB	CD2	4449385	4443326	9606.ENSP00000427114	9606.ENSP00000358490	0	0	0	0	0.523	0	0	0.213	0.608
COL5A2	FN1	4444466	4441661	9606.ENSP00000364000	9606.ENSP00000346839	0	0	0	0	0.351	0	0	0.421	0.608
TYROBP	LYZ	4435115	4434847	9606.ENSP00000262629	9606.ENSP00000261267	0	0	0	0	0.579	0	0	0.106	0.608
PTHLH	ANGPTL4	4450000	4437761	9606.ENSP00000441765	9606.ENSP00000301455	0	0	0	0	0.065	0	0	0.598	0.608
CD48	EVI2B	4451851	4440484	9606.ENSP00000484431	9606.ENSP00000333779	0	0	0	0	0.533	0	0	0.196	0.608
GABRA2	PLCL1	4449188	4448249	9606.ENSP00000421828	9606.ENSP00000402861	0	0	0	0	0.061	0	0.6	0	0.608
SLC12A1	RHCG	4446564	4435805	9606.ENSP00000379822	9606.ENSP00000268122	0	0	0	0	0.171	0	0	0.547	0.608
CASR	KL	4449096	4445327	9606.ENSP00000420194	9606.ENSP00000369442	0	0	0	0	0.069	0	0	0.596	0.608
VEGFA	LOX	4451310	4433517	9606.ENSP00000478570	9606.ENSP00000231004	0	0	0	0	0.087	0	0	0.588	0.607
CTH	DAO	4443637	4433414	9606.ENSP00000359976	9606.ENSP00000228476	0.055	0	0	0	0.104	0	0	0.574	0.607
FGF1	CALB1	4451524	4435604	9606.ENSP00000480791	9606.ENSP00000265431	0	0	0	0	0.065	0.262	0	0.476	0.607
PARVG	PLEK	4447700	4433624	9606.ENSP00000391583	9606.ENSP00000234313	0	0	0	0	0.499	0	0	0.248	0.607
MKI67	ATAD2	4443142	4436722	9606.ENSP00000357643	9606.ENSP00000287394	0	0	0	0	0.548	0	0	0.167	0.607
XPNPEP2	ACSM3	4443668	4436811	9606.ENSP00000360147	9606.ENSP00000289416	0	0	0	0	0.581	0	0	0.099	0.606
TNFRSF10B	BIRC3	4436223	4435265	9606.ENSP00000276431	9606.ENSP00000263464	0	0	0	0	0	0	0	0.606	0.606
LOXL2	FN1	4445831	4441661	9606.ENSP00000373783	9606.ENSP00000346839	0	0	0	0	0.227	0.157	0	0.445	0.606
IGFBP3	TGM2	4445494	4442654	9606.ENSP00000370473	9606.ENSP00000355330	0	0	0	0	0.109	0	0	0.576	0.606
CD48	TYROBP	4451851	4435115	9606.ENSP00000484431	9606.ENSP00000262629	0	0	0	0	0.42	0	0	0.348	0.605
ALB	LYZ	4437206	4434847	9606.ENSP00000295897	9606.ENSP00000261267	0	0	0	0	0.092	0	0	0.583	0.605
ABCB1	SLC22A6	4451279	4444960	9606.ENSP00000478255	9606.ENSP00000367102	0	0.002	0	0	0.055	0.052	0	0.595	0.605
ENO2	ATP6V0A4	4449816	4438387	9606.ENSP00000437402	9606.ENSP00000308122	0	0	0	0	0.086	0	0	0.586	0.605
SLC15A2	SLC22A13	4448865	4438571	9606.ENSP00000417085	9606.ENSP00000310241	0	0	0	0	0.061	0	0	0.597	0.605
LY86	C3AR1	4445292	4437821	9606.ENSP00000369286	9606.ENSP00000302079	0	0	0	0	0.569	0	0	0.118	0.604
CAV1	ALB	4440933	4437206	9606.ENSP00000339191	9606.ENSP00000295897	0	0	0	0	0	0	0	0.604	0.604
HCK	LY86	4450141	4445292	9606.ENSP00000444986	9606.ENSP00000369286	0	0	0	0	0.561	0	0	0.135	0.604
CLCNKB	CLIC5	4444605	4432744	9606.ENSP00000364831	9606.ENSP00000185206	0	0	0	0	0	0	0.54	0.176	0.604
ITGB2	IGSF6	4446737	4435822	9606.ENSP00000380948	9606.ENSP00000268389	0	0	0	0	0.604	0	0	0	0.604
ATP6V0A4	SLC4A1	4438387	4435075	9606.ENSP00000308122	9606.ENSP00000262418	0	0	0	0	0.061	0	0	0.596	0.604
CNTN1	ANK3	4450218	4436396	9606.ENSP00000447006	9606.ENSP00000280772	0	0	0	0	0.158	0.297	0	0.383	0.603
SLC12A1	CLDN16	4446564	4435489	9606.ENSP00000379822	9606.ENSP00000264734	0	0	0	0	0.063	0	0	0.593	0.603
SLC26A4	SLC9A3	4435634	4435520	9606.ENSP00000265715	9606.ENSP00000264938	0	0	0	0	0	0	0	0.603	0.603
ALDOB	PCK1	4444463	4439313	9606.ENSP00000363988	9606.ENSP00000319814	0	0	0	0	0.251	0	0	0.492	0.603
LHFPL2	FBLN5	4445374	4441481	9606.ENSP00000369702	9606.ENSP00000345008	0	0	0	0	0.061	0	0	0.594	0.603
GATA3	ERBB2	4445191	4435897	9606.ENSP00000368632	9606.ENSP00000269571	0	0	0	0	0.062	0	0	0.594	0.603
GMFG	ITGB2	4451021	4446737	9606.ENSP00000472249	9606.ENSP00000380948	0	0	0	0	0.53	0	0	0.189	0.602
ALB	PVALB	4437206	4432927	9606.ENSP00000295897	9606.ENSP00000216200	0	0	0	0	0.072	0	0	0.589	0.602
SLAMF8	CSF1R	4436821	4436666	9606.ENSP00000289707	9606.ENSP00000286301	0	0	0	0	0.563	0	0	0.126	0.602
CCL5	ALB	4451102	4437206	9606.ENSP00000474412	9606.ENSP00000295897	0	0	0	0	0	0	0	0.602	0.602
OSMR	ERBB2	4436121	4435897	9606.ENSP00000274276	9606.ENSP00000269571	0	0	0	0	0.063	0.543	0	0.146	0.602
KIT	EPCAM	4436763	4435308	9606.ENSP00000288135	9606.ENSP00000263735	0	0	0	0	0	0	0	0.602	0.602
COL1A1	SERPINE1	4433346	4433266	9606.ENSP00000225964	9606.ENSP00000223095	0	0	0	0	0.214	0.062	0	0.503	0.602
THEMIS2	TYROBP	4444288	4435115	9606.ENSP00000363031	9606.ENSP00000262629	0	0	0	0	0.576	0	0	0.096	0.601
TACSTD2	EGFR	4443701	4436186	9606.ENSP00000360269	9606.ENSP00000275493	0	0	0	0	0.09	0	0	0.58	0.601
CD48	LAPTM5	4451851	4437079	9606.ENSP00000484431	9606.ENSP00000294507	0	0	0	0	0.562	0	0	0.126	0.601
LOXL2	COL1A1	4445831	4433346	9606.ENSP00000373783	9606.ENSP00000225964	0	0	0	0	0.294	0	0	0.457	0.6
SLC2A1	EGLN3	4448824	4434133	9606.ENSP00000416293	9606.ENSP00000250457	0	0	0	0	0.085	0	0	0.581	0.6
PPP1R3B	RPS6KA6	4438400	4435134	9606.ENSP00000308318	9606.ENSP00000262752	0	0	0	0	0	0	0.6	0	0.6
SH3GL2	PDGFRA	4445424	4434540	9606.ENSP00000369981	9606.ENSP00000257290	0	0	0	0	0	0	0.6	0.041	0.6
RPS6KA6	PPP1R3C	4435134	4433728	9606.ENSP00000262752	9606.ENSP00000238994	0	0	0	0	0	0	0.6	0	0.6
HCK	MYO1F	4450141	4441469	9606.ENSP00000444986	9606.ENSP00000344871	0	0	0	0	0.59	0.064	0	0	0.6
SLIT2	SEMA6D	4449223	4439723	9606.ENSP00000422591	9606.ENSP00000324857	0	0	0	0	0.098	0	0	0.574	0.6
ERBB4	PVALB	4441238	4432927	9606.ENSP00000342235	9606.ENSP00000216200	0	0	0	0	0.096	0	0	0.576	0.6
TLR7	FCGR2A	4445433	4435978	9606.ENSP00000370034	9606.ENSP00000271450	0	0	0	0	0.152	0	0	0.548	0.6
SLC47A2	SLC22A13	4439869	4438571	9606.ENSP00000326671	9606.ENSP00000310241	0	0	0	0	0.062	0	0	0.59	0.599
MMP9	FN1	4443919	4441661	9606.ENSP00000361405	9606.ENSP00000346839	0	0	0	0.601	0	0.379	0	0.894	0.599
DACH1	CCND1	4451650	4433391	9606.ENSP00000482245	9606.ENSP00000227507	0	0	0	0	0	0	0	0.598	0.598
NPNT	FRAS1	4447597	4439842	9606.ENSP00000389252	9606.ENSP00000326330	0	0	0	0	0.076	0.085	0	0.562	0.598
CASP1	LY96	4449658	4436604	9606.ENSP00000433138	9606.ENSP00000284818	0	0	0	0	0.33	0	0	0.424	0.598
CSPG4	LOX	4438793	4433517	9606.ENSP00000312506	9606.ENSP00000231004	0	0	0	0	0.493	0	0	0.239	0.598
VEGFA	CEACAM1	4451310	4432684	9606.ENSP00000478570	9606.ENSP00000161559	0	0	0	0	0	0	0	0.597	0.598
RGS1	C1QB	4442888	4438900	9606.ENSP00000356429	9606.ENSP00000313967	0	0	0	0	0.545	0	0	0.153	0.598
CYBB	CAV1	4445083	4440933	9606.ENSP00000367851	9606.ENSP00000339191	0	0	0	0	0	0	0	0.598	0.598
ABCB1	NR1I3	4451279	4442999	9606.ENSP00000478255	9606.ENSP00000356959	0	0	0	0	0.061	0	0	0.589	0.597
CNTN1	ANK2	4450218	4441946	9606.ENSP00000447006	9606.ENSP00000349588	0	0	0	0	0.232	0.297	0	0.314	0.597
CXCR4	SCD5	4447439	4439049	9606.ENSP00000386884	9606.ENSP00000316329	0	0	0	0	0	0.05	0	0.593	0.597
FYB	EVI2B	4449385	4440484	9606.ENSP00000427114	9606.ENSP00000333779	0	0	0	0	0.561	0	0	0.12	0.597
CD48	LY86	4451851	4445292	9606.ENSP00000484431	9606.ENSP00000369286	0	0	0	0	0.553	0	0	0.132	0.596
QPRT	DOC2A	4446401	4441015	9606.ENSP00000378782	9606.ENSP00000340017	0	0	0	0	0	0	0	0.596	0.596
MT1X	SLC30A2	4446278	4444357	9606.ENSP00000377995	9606.ENSP00000363394	0	0	0	0	0.055	0	0	0.59	0.596
FAM83B	EGFR	4438019	4436186	9606.ENSP00000304078	9606.ENSP00000275493	0	0	0	0	0.076	0	0	0.58	0.596
GATA3	KRT7	4445191	4440087	9606.ENSP00000368632	9606.ENSP00000329243	0	0	0	0	0.082	0	0	0.578	0.596
COL4A1	DCN	4444632	4432629	9606.ENSP00000364979	9606.ENSP00000052754	0	0	0	0	0.168	0.334	0	0.328	0.596
PTPRC	EGF	4448605	4435570	9606.ENSP00000411355	9606.ENSP00000265171	0	0	0	0	0	0	0	0.595	0.595
LCP1	DOCK2	4446831	4434518	9606.ENSP00000381581	9606.ENSP00000256935	0	0	0	0	0.569	0	0	0.098	0.595
VEGFA	SUCNR1	4451310	4442617	9606.ENSP00000478570	9606.ENSP00000355156	0	0	0	0	0	0	0	0.595	0.595
IGFBP3	PAPPA2	4445494	4442935	9606.ENSP00000370473	9606.ENSP00000356634	0	0	0	0	0	0.379	0	0.375	0.595
CYBB	TYROBP	4445083	4435115	9606.ENSP00000367851	9606.ENSP00000262629	0	0	0	0	0.56	0	0	0.116	0.595
ITGB2	THEMIS2	4446737	4444288	9606.ENSP00000380948	9606.ENSP00000363031	0	0	0	0	0.581	0	0	0.073	0.595
ABCA1	ANGPTL4	4444444	4437761	9606.ENSP00000363868	9606.ENSP00000301455	0	0	0	0	0.085	0	0	0.574	0.594
CD2	CD84	4443326	4438778	9606.ENSP00000358490	9606.ENSP00000312367	0	0	0	0	0.161	0	0	0.536	0.594
VSIG4	MYOF	4444445	4442225	9606.ENSP00000363869	9606.ENSP00000352208	0	0	0	0	0	0	0	0.593	0.593
ABCA1	CSF1R	4444444	4436666	9606.ENSP00000363868	9606.ENSP00000286301	0	0	0	0	0.086	0.051	0	0.569	0.593
CYBB	CSF1R	4445083	4436666	9606.ENSP00000367851	9606.ENSP00000286301	0	0	0	0	0.467	0	0	0.268	0.593
APBB1IP	DOCK2	4444696	4434518	9606.ENSP00000365411	9606.ENSP00000256935	0	0	0	0	0.416	0	0	0.331	0.593
VEGFA	SEMA6D	4451310	4439723	9606.ENSP00000478570	9606.ENSP00000324857	0	0	0	0	0.061	0	0	0.585	0.593
PTPRC	KRT7	4448605	4440087	9606.ENSP00000411355	9606.ENSP00000329243	0	0	0	0	0.049	0.058	0	0.583	0.593
MUC1	CXCR4	4451890	4447439	9606.ENSP00000484824	9606.ENSP00000386884	0	0	0	0	0	0	0	0.593	0.593
LY86	CD53	4445292	4435973	9606.ENSP00000369286	9606.ENSP00000271324	0	0	0	0	0.561	0	0	0.112	0.593
MB21D1	SAMHD1	4443500	4435153	9606.ENSP00000359339	9606.ENSP00000262878	0	0	0	0	0	0	0	0.593	0.593
EZH2	HOXB9	4439336	4438501	9606.ENSP00000320147	9606.ENSP00000309439	0	0	0	0	0.07	0.088	0	0.558	0.593
C1QB	PLEK	4438900	4433624	9606.ENSP00000313967	9606.ENSP00000234313	0	0	0	0	0.583	0	0	0.064	0.593
C1QA	MS4A4A	4444428	4440887	9606.ENSP00000363773	9606.ENSP00000338648	0	0	0	0	0.542	0	0	0.149	0.593
IGFBP3	PAPPA	4445494	4440201	9606.ENSP00000370473	9606.ENSP00000330658	0	0	0	0	0.131	0	0	0.551	0.593
VEGFA	SEMA5B	4451310	4447616	9606.ENSP00000478570	9606.ENSP00000389588	0	0	0	0	0.061	0	0	0.585	0.593
DNAH11	CDCA7L	4451146	4447060	9606.ENSP00000475939	9606.ENSP00000383986	0	0	0	0	0.085	0	0	0.573	0.593
NEDD4L	SLC9A3	4446996	4435520	9606.ENSP00000383199	9606.ENSP00000264938	0	0	0	0	0.061	0.379	0	0.359	0.593
CXCR4	FLT1	4447439	4436489	9606.ENSP00000386884	9606.ENSP00000282397	0	0	0	0	0	0.05	0	0.588	0.592
NR3C2	SCNN1B	4442077	4441549	9606.ENSP00000350815	9606.ENSP00000345751	0	0	0	0	0	0.05	0	0.588	0.592
EGFR	BIRC3	4436186	4435265	9606.ENSP00000275493	9606.ENSP00000263464	0	0	0	0	0	0.336	0	0.411	0.592
VEGFA	ANGPTL4	4451310	4437761	9606.ENSP00000478570	9606.ENSP00000301455	0	0	0	0	0.065	0	0	0.582	0.592
C1QB	LCP2	4438900	4432628	9606.ENSP00000313967	9606.ENSP00000046794	0	0	0	0	0.53	0	0	0.166	0.592
SLC23A1	SLC2A3	4437903	4432652	9606.ENSP00000302851	9606.ENSP00000075120	0	0	0	0	0.061	0	0	0.583	0.592
FBP1	PYGL	4448472	4432954	9606.ENSP00000408025	9606.ENSP00000216392	0.05	0	0	0	0.063	0.058	0	0.571	0.592
PDK1	SLC2A3	4446044	4432652	9606.ENSP00000376352	9606.ENSP00000075120	0	0	0	0	0.064	0.055	0	0.575	0.592
HAO2	HMGCS2	4451782	4443311	9606.ENSP00000483507	9606.ENSP00000358414	0.167	0	0	0	0.2	0	0	0.437	0.592
CYP17A1	HSD11B2	4443418	4439082	9606.ENSP00000358903	9606.ENSP00000316786	0	0	0	0	0	0.064	0	0.581	0.591
TGFBI	COL4A1	4448825	4444632	9606.ENSP00000416330	9606.ENSP00000364979	0	0	0	0	0.152	0.32	0	0.348	0.591
CD48	CD300A	4451851	4442338	9606.ENSP00000484431	9606.ENSP00000353259	0	0	0	0	0.405	0	0	0.341	0.591
FYB	CD53	4449385	4435973	9606.ENSP00000427114	9606.ENSP00000271324	0	0	0	0	0.553	0	0	0.123	0.591
LHX1	WT1	4451244	4440250	9606.ENSP00000477829	9606.ENSP00000331327	0	0	0	0	0	0.077	0	0.576	0.591
PRLR	SLC12A3	4451730	4448218	9606.ENSP00000482954	9606.ENSP00000402152	0	0	0	0	0	0	0	0.59	0.59
MUC1	VEGFA	4451890	4451310	9606.ENSP00000484824	9606.ENSP00000478570	0	0	0	0	0.108	0	0	0.559	0.59
F11	ALB	4447185	4437206	9606.ENSP00000384957	9606.ENSP00000295897	0	0	0	0	0.348	0	0	0.397	0.59
CTSS	EVI2B	4443237	4440484	9606.ENSP00000357981	9606.ENSP00000333779	0	0	0	0	0.563	0	0	0.1	0.59
KNG1	TLR2	4435537	4434743	9606.ENSP00000265023	9606.ENSP00000260010	0	0	0	0	0.061	0	0	0.581	0.59
PTPRC	C1QA	4448605	4444428	9606.ENSP00000411355	9606.ENSP00000363773	0	0	0	0	0.441	0	0	0.296	0.59
NTNG1	PLXND1	4443452	4439102	9606.ENSP00000359085	9606.ENSP00000317128	0	0	0	0	0.061	0	0	0.58	0.589
GPR65	LCP2	4435771	4432628	9606.ENSP00000267549	9606.ENSP00000046794	0	0	0	0	0.579	0	0	0.063	0.589
GLDC	TYMS	4445533	4439011	9606.ENSP00000370737	9606.ENSP00000315644	0.224	0	0	0	0	0	0	0.492	0.589
KCNJ1	CLDN16	4446057	4435489	9606.ENSP00000376432	9606.ENSP00000264734	0	0	0	0	0.091	0	0	0.567	0.589
CD86	PLEK	4440320	4433624	9606.ENSP00000332049	9606.ENSP00000234313	0	0	0	0	0.55	0	0	0.124	0.589
PAPPA	IGFBP2	4440201	4433603	9606.ENSP00000330658	9606.ENSP00000233809	0	0	0	0	0	0	0	0.589	0.589
GABRA2	ADH1B	4449188	4438237	9606.ENSP00000421828	9606.ENSP00000306606	0	0	0	0	0	0	0	0.589	0.589
CCL5	TIMP1	4451102	4433052	9606.ENSP00000474412	9606.ENSP00000218388	0	0	0	0	0	0	0	0.589	0.589
KLK7	KNG1	4445953	4435537	9606.ENSP00000375683	9606.ENSP00000265023	0	0	0	0	0	0	0	0.589	0.589
CSPG4	PDGFRA	4438793	4434540	9606.ENSP00000312506	9606.ENSP00000257290	0	0	0	0	0.154	0	0	0.534	0.589
SH3PXD2B	SCIN	4438532	4437359	9606.ENSP00000309714	9606.ENSP00000297029	0	0	0	0	0	0.124	0.54	0.064	0.589
ALB	LOX	4437206	4433517	9606.ENSP00000295897	9606.ENSP00000231004	0	0	0	0	0.063	0	0	0.578	0.588
SCD	PCK2	4443512	4432982	9606.ENSP00000359380	9606.ENSP00000216780	0	0	0	0	0	0	0	0.588	0.588
KIT	CCND1	4436763	4433391	9606.ENSP00000288135	9606.ENSP00000227507	0	0	0	0	0.051	0	0	0.584	0.588
LAPTM5	FERMT3	4437079	4436340	9606.ENSP00000294507	9606.ENSP00000279227	0	0	0	0	0.588	0	0	0	0.588
MS4A6A	C1QC	4447767	4444427	9606.ENSP00000392770	9606.ENSP00000363770	0	0	0	0	0.541	0	0	0.14	0.588
ACADSB	ACOX2	4443211	4438346	9606.ENSP00000357873	9606.ENSP00000307697	0	0	0	0	0.061	0	0	0.579	0.588
LY86	CYBB	4445292	4445083	9606.ENSP00000369286	9606.ENSP00000367851	0	0	0	0	0.551	0	0	0.12	0.588
PROM1	MET	4449376	4439114	9606.ENSP00000426809	9606.ENSP00000317272	0	0	0	0	0.084	0	0	0.569	0.588
ENO2	PTPRC	4449816	4448605	9606.ENSP00000437402	9606.ENSP00000411355	0	0	0	0	0	0	0	0.588	0.588
MUC1	ENO2	4451890	4449816	9606.ENSP00000484824	9606.ENSP00000437402	0	0	0	0	0	0	0	0.588	0.588
TLR7	MB21D1	4445433	4443500	9606.ENSP00000370034	9606.ENSP00000359339	0	0	0	0	0	0	0	0.588	0.588
VEGFA	TGFA	4451310	4437149	9606.ENSP00000478570	9606.ENSP00000295400	0	0	0	0	0	0	0	0.588	0.588
KCNJ10	FOXI1	4443029	4438038	9606.ENSP00000357068	9606.ENSP00000304286	0	0	0	0	0	0	0	0.588	0.588
ACSF2	ACOX2	4448199	4438346	9606.ENSP00000401831	9606.ENSP00000307697	0.055	0	0	0	0.082	0	0	0.562	0.587
PGF	EGF	4450339	4435570	9606.ENSP00000451040	9606.ENSP00000265171	0	0	0	0	0	0	0	0.587	0.587
ANGPTL4	PLIN2	4437761	4436246	9606.ENSP00000301455	9606.ENSP00000276914	0	0	0	0	0.077	0	0	0.571	0.587
IDO1	TNFAIP6	4449569	4433852	9606.ENSP00000430950	9606.ENSP00000243347	0	0	0	0	0.098	0	0	0.56	0.586
CAV1	SERPINE1	4440933	4433266	9606.ENSP00000339191	9606.ENSP00000223095	0	0	0	0	0.314	0	0	0.422	0.586
TIMP1	DCN	4433052	4432629	9606.ENSP00000218388	9606.ENSP00000052754	0	0	0	0	0.062	0.064	0	0.567	0.586
VSIG4	TREM2	4444445	4444111	9606.ENSP00000363869	9606.ENSP00000362205	0	0	0	0	0.531	0	0	0.153	0.586
CLCNKB	CLDN16	4444605	4435489	9606.ENSP00000364831	9606.ENSP00000264734	0	0	0	0	0.061	0	0	0.578	0.586
ALB	CALB1	4437206	4435604	9606.ENSP00000295897	9606.ENSP00000265431	0	0	0	0	0	0	0	0.586	0.586
FERMT3	LCP2	4436340	4432628	9606.ENSP00000279227	9606.ENSP00000046794	0	0	0	0	0.384	0	0	0.356	0.586
SLC22A7	SLC47A2	4443974	4439869	9606.ENSP00000361666	9606.ENSP00000326671	0	0	0	0	0.062	0	0	0.576	0.585
LY86	PLEK	4445292	4433624	9606.ENSP00000369286	9606.ENSP00000234313	0	0	0	0	0.579	0	0	0.056	0.585
IDO1	QPRT	4449569	4446401	9606.ENSP00000430950	9606.ENSP00000378782	0	0	0	0	0	0	0	0.585	0.585
CD163	SLAMF8	4442211	4436821	9606.ENSP00000352071	9606.ENSP00000289707	0	0	0	0	0.557	0	0	0.103	0.585
FN1	TNFAIP6	4441661	4433852	9606.ENSP00000346839	9606.ENSP00000243347	0	0	0	0	0.061	0.379	0	0.346	0.585
FYB	C1QB	4449385	4438900	9606.ENSP00000427114	9606.ENSP00000313967	0	0	0	0	0.56	0	0	0.095	0.585
KCNJ1	SLC5A2	4446057	4439964	9606.ENSP00000376432	9606.ENSP00000327943	0	0	0	0	0.062	0	0	0.576	0.585
PCK1	ACSM3	4439313	4436811	9606.ENSP00000319814	9606.ENSP00000289416	0	0	0	0	0.547	0	0	0.123	0.585
TLR3	ICAM1	4437339	4435501	9606.ENSP00000296795	9606.ENSP00000264832	0	0	0	0	0	0	0	0.584	0.584
TLR7	C3AR1	4445433	4437821	9606.ENSP00000370034	9606.ENSP00000302079	0	0	0	0	0.387	0	0	0.349	0.584
TLR2	AQP9	4434743	4433107	9606.ENSP00000260010	9606.ENSP00000219919	0	0	0	0	0.551	0.063	0	0.092	0.584
ALB	HYAL1	4437206	4435677	9606.ENSP00000295897	9606.ENSP00000266031	0	0	0	0	0.068	0	0	0.572	0.584
EZH2	PRDM16	4439336	4435959	9606.ENSP00000320147	9606.ENSP00000270722	0	0	0	0	0.051	0.164	0	0.518	0.584
ANK2	DCLK1	4441946	4434434	9606.ENSP00000349588	9606.ENSP00000255448	0	0	0	0	0.359	0.069	0	0.359	0.584
FN1	FLT1	4441661	4436489	9606.ENSP00000346839	9606.ENSP00000282397	0	0	0	0	0.061	0	0	0.574	0.583
RAPGEF3	RASD1	4447902	4433328	9606.ENSP00000395708	9606.ENSP00000225688	0	0	0	0	0.088	0.18	0	0.487	0.583
FREM1	FRAS1	4448667	4439842	9606.ENSP00000412940	9606.ENSP00000326330	0	0	0	0.559	0.076	0.263	0	0.94	0.583
FYB	PTPN22	4449385	4442291	9606.ENSP00000427114	9606.ENSP00000352833	0	0	0	0	0.559	0	0	0.093	0.583
ERBB2	CDH3	4435897	4435356	9606.ENSP00000269571	9606.ENSP00000264012	0	0	0	0	0.088	0	0	0.562	0.583
LOX	TIMP1	4433517	4433052	9606.ENSP00000231004	9606.ENSP00000218388	0	0	0	0	0.184	0	0	0.51	0.583
EZH2	FANCI	4439336	4438638	9606.ENSP00000320147	9606.ENSP00000310842	0	0	0	0	0.563	0	0	0.086	0.583
VIM	EPCAM	4450181	4435308	9606.ENSP00000446007	9606.ENSP00000263735	0	0	0	0	0	0	0	0.583	0.583
IGSF6	AQP9	4435822	4433107	9606.ENSP00000268389	9606.ENSP00000219919	0	0	0	0	0.55	0	0	0.112	0.583
GPC3	KRT7	4446259	4440087	9606.ENSP00000377836	9606.ENSP00000329243	0	0	0	0	0	0	0	0.583	0.583
COL4A1	MMP9	4444632	4443919	9606.ENSP00000364979	9606.ENSP00000361405	0	0	0	0	0	0.328	0	0.405	0.583
CCL5	CASP1	4451102	4449658	9606.ENSP00000474412	9606.ENSP00000433138	0	0	0	0	0.127	0	0	0.542	0.583
BIRC3	CCND1	4435265	4433391	9606.ENSP00000263464	9606.ENSP00000227507	0	0	0	0	0	0	0	0.582	0.582
ATP1A1	SLC12A1	4450152	4446564	9606.ENSP00000445306	9606.ENSP00000379822	0.042	0	0	0	0.061	0.066	0	0.561	0.582
IDO1	TLR2	4449569	4434743	9606.ENSP00000430950	9606.ENSP00000260010	0	0	0	0	0.091	0	0	0.559	0.582
C3AR1	TLR2	4437821	4434743	9606.ENSP00000302079	9606.ENSP00000260010	0	0	0	0	0.308	0	0	0.421	0.582
KLK6	KNG1	4444787	4435537	9606.ENSP00000366047	9606.ENSP00000265023	0	0	0	0	0	0	0	0.581	0.581
LCP1	LCP2	4446831	4432628	9606.ENSP00000381581	9606.ENSP00000046794	0	0	0	0	0.57	0	0	0.064	0.581
VSIG4	FCER1G	4444445	4436828	9606.ENSP00000363869	9606.ENSP00000289902	0	0	0	0	0.522	0	0	0.16	0.581
CCL5	EGF	4451102	4435570	9606.ENSP00000474412	9606.ENSP00000265171	0	0	0	0	0	0	0	0.581	0.581
FGF9	CCND1	4445677	4433391	9606.ENSP00000371790	9606.ENSP00000227507	0	0	0	0	0	0	0	0.58	0.581
HOGA1	SLC34A1	4443592	4439443	9606.ENSP00000359680	9606.ENSP00000321424	0	0	0	0	0.509	0	0	0.181	0.581
C7	HRG	4439494	4433552	9606.ENSP00000322061	9606.ENSP00000232003	0	0	0	0	0	0	0	0.581	0.581
TMEM45A	STC2	4439251	4435556	9606.ENSP00000319009	9606.ENSP00000265087	0	0	0	0	0.061	0	0	0.571	0.58
SLC30A2	MT1H	4444357	4440195	9606.ENSP00000363394	9606.ENSP00000330587	0	0	0	0	0.055	0	0	0.574	0.58
TLR7	ICAM1	4445433	4435501	9606.ENSP00000370034	9606.ENSP00000264832	0	0	0	0	0.084	0	0	0.56	0.579
DEFB1	ALB	4437405	4437206	9606.ENSP00000297439	9606.ENSP00000295897	0	0	0	0	0.062	0	0	0.57	0.579
EGFR	SORT1	4436186	4434501	9606.ENSP00000275493	9606.ENSP00000256637	0	0	0	0	0.061	0	0	0.57	0.579
FN1	TLR2	4441661	4434743	9606.ENSP00000346839	9606.ENSP00000260010	0	0	0	0	0.062	0	0	0.57	0.579
TNFAIP3	CCL20	4451592	4442174	9606.ENSP00000481570	9606.ENSP00000351671	0	0	0	0	0.269	0	0	0.448	0.579
MMP9	PTGER3	4443919	4441881	9606.ENSP00000361405	9606.ENSP00000349003	0	0	0	0	0	0.064	0	0.569	0.579
PTPRC	C1QB	4448605	4438900	9606.ENSP00000411355	9606.ENSP00000313967	0	0	0	0	0.486	0	0	0.214	0.579
HCK	IGSF6	4450141	4435822	9606.ENSP00000444986	9606.ENSP00000268389	0	0	0	0	0.579	0	0	0	0.579
CA9	ERBB2	4445040	4435897	9606.ENSP00000367608	9606.ENSP00000269571	0	0	0	0	0.062	0	0	0.57	0.579
SLC30A2	MT1F	4444357	4440608	9606.ENSP00000363394	9606.ENSP00000334872	0	0	0	0	0.055	0	0	0.573	0.579
ALB	RHCG	4437206	4435805	9606.ENSP00000295897	9606.ENSP00000268122	0	0	0	0	0.061	0	0	0.57	0.579
MMP9	LOX	4443919	4433517	9606.ENSP00000361405	9606.ENSP00000231004	0	0	0	0	0.061	0	0	0.571	0.579
UMOD	KCNJ1	4446508	4446057	9606.ENSP00000379438	9606.ENSP00000376432	0	0	0	0	0.118	0	0	0.541	0.578
MT1X	CP	4446278	4435459	9606.ENSP00000377995	9606.ENSP00000264613	0	0	0	0	0	0	0	0.578	0.578
MT1G	SLC30A2	4447689	4444357	9606.ENSP00000391397	9606.ENSP00000363394	0	0	0	0	0.055	0	0	0.572	0.578
ENTPD1	CD86	4443695	4440320	9606.ENSP00000360250	9606.ENSP00000332049	0	0	0	0	0.14	0	0	0.53	0.578
VIM	LGALS1	4450181	4432889	9606.ENSP00000446007	9606.ENSP00000215909	0	0	0	0	0.336	0	0	0.39	0.578
C1QA	RGS1	4444428	4442888	9606.ENSP00000363773	9606.ENSP00000356429	0	0	0	0	0.543	0	0	0.116	0.578
SCD	PCK1	4443512	4439313	9606.ENSP00000359380	9606.ENSP00000319814	0	0	0	0	0.05	0	0	0.574	0.578
STK32A	TMEM72	4446823	4445863	9606.ENSP00000381535	9606.ENSP00000374234	0	0	0	0	0	0	0	0.578	0.578
FN1	KIT	4441661	4436763	9606.ENSP00000346839	9606.ENSP00000288135	0	0	0	0	0.061	0	0	0.569	0.578
FN1	CSPG4	4441661	4438793	9606.ENSP00000346839	9606.ENSP00000312506	0	0	0	0	0.229	0	0	0.476	0.578
HCK	FN1	4450141	4441661	9606.ENSP00000444986	9606.ENSP00000346839	0	0	0	0	0.061	0.332	0	0.382	0.578
NR0B2	CCND1	4434348	4433391	9606.ENSP00000254227	9606.ENSP00000227507	0	0	0	0	0	0.05	0	0.573	0.577
PTPRO	ERBB2	4436417	4435897	9606.ENSP00000281171	9606.ENSP00000269571	0	0	0	0	0	0.167	0	0.512	0.577
PFKP	PDHA1	4445499	4445276	9606.ENSP00000370517	9606.ENSP00000369134	0.059	0	0	0	0.063	0.185	0	0.481	0.577
GMFG	PLEK	4451021	4433624	9606.ENSP00000472249	9606.ENSP00000234313	0	0	0	0	0.543	0	0	0.111	0.577
KIT	FCGR2A	4436763	4435978	9606.ENSP00000288135	9606.ENSP00000271450	0	0	0	0	0.061	0	0	0.568	0.577
LILRB1	TYROBP	4439032	4435115	9606.ENSP00000315997	9606.ENSP00000262629	0	0	0	0	0.23	0	0	0.474	0.577
GMFG	PTPRC	4451021	4448605	9606.ENSP00000472249	9606.ENSP00000411355	0	0	0	0	0.577	0	0	0.041	0.577
ANGPTL4	EGF	4437761	4435570	9606.ENSP00000301455	9606.ENSP00000265171	0	0	0	0	0	0	0	0.577	0.577
NPHS1	FN1	4445133	4441661	9606.ENSP00000368190	9606.ENSP00000346839	0	0	0	0	0	0	0	0.577	0.577
DTL	CDCA2	4442781	4439997	9606.ENSP00000355958	9606.ENSP00000328228	0	0	0	0	0.577	0	0	0	0.577
PTPRC	GATA3	4448605	4445191	9606.ENSP00000411355	9606.ENSP00000368632	0	0	0	0	0.061	0	0	0.568	0.577
MS4A4A	C1QB	4440887	4438900	9606.ENSP00000338648	9606.ENSP00000313967	0	0	0	0	0.532	0	0	0.135	0.577
THRB	DIO1	4446585	4442509	9606.ENSP00000379904	9606.ENSP00000354643	0	0	0	0	0.061	0	0	0.568	0.577
NR0B2	G6PC	4434348	4434327	9606.ENSP00000254227	9606.ENSP00000253801	0	0	0	0	0.11	0	0	0.542	0.576
MT1E	CP	4438349	4435459	9606.ENSP00000307706	9606.ENSP00000264613	0	0	0	0	0	0	0	0.576	0.576
ITGB2	VNN2	4446737	4439513	9606.ENSP00000380948	9606.ENSP00000322276	0	0	0	0	0.332	0.379	0	0.059	0.576
ALDOB	SULT1C2	4444463	4439294	9606.ENSP00000363988	9606.ENSP00000319622	0	0	0	0	0.519	0	0	0.155	0.576
VSIG4	MS4A4A	4444445	4440887	9606.ENSP00000363869	9606.ENSP00000338648	0	0	0	0	0.545	0	0	0.108	0.576
SLA	PLEK	4447831	4433624	9606.ENSP00000394049	9606.ENSP00000234313	0	0	0	0	0.56	0	0	0.074	0.575
LOX	SERPINE1	4433517	4433266	9606.ENSP00000231004	9606.ENSP00000223095	0	0	0	0	0.305	0	0	0.413	0.575
FGF9	ALB	4445677	4437206	9606.ENSP00000371790	9606.ENSP00000295897	0	0	0	0	0	0	0	0.575	0.575
ABCB1	PROM1	4451279	4449376	9606.ENSP00000478255	9606.ENSP00000426809	0	0	0	0	0.062	0	0	0.566	0.575
CD37	CD180	4439789	4434486	9606.ENSP00000325708	9606.ENSP00000256447	0	0	0	0	0.129	0	0	0.532	0.575
STC2	CCND1	4435556	4433391	9606.ENSP00000265087	9606.ENSP00000227507	0	0	0	0	0.189	0	0	0.498	0.575
PAQR5	HS6ST1	4446405	4434688	9606.ENSP00000378803	9606.ENSP00000259241	0	0	0	0	0	0	0	0.574	0.574
LY86	DOCK2	4445292	4434518	9606.ENSP00000369286	9606.ENSP00000256935	0	0	0	0	0.534	0	0	0.124	0.574
TREM2	CD300A	4444111	4442338	9606.ENSP00000362205	9606.ENSP00000353259	0	0	0	0	0.119	0	0	0.536	0.574
CEL	SLC6A3	4443875	4435941	9606.ENSP00000361151	9606.ENSP00000270349	0	0	0	0	0	0	0	0.574	0.574
MCOLN3	KCNJ10	4443579	4443029	9606.ENSP00000359621	9606.ENSP00000357068	0	0	0	0	0	0	0	0.574	0.574
CASP1	PTPRC	4449658	4448605	9606.ENSP00000433138	9606.ENSP00000411355	0	0	0	0	0.293	0	0	0.421	0.574
RALYL	CA10	4449534	4448360	9606.ENSP00000430128	9606.ENSP00000405388	0	0	0	0	0.348	0	0	0.372	0.574
NR0B2	SERPINE1	4434348	4433266	9606.ENSP00000254227	9606.ENSP00000223095	0	0	0	0	0	0.051	0	0.57	0.574
ALB	G6PC	4437206	4434327	9606.ENSP00000295897	9606.ENSP00000253801	0	0	0	0	0.126	0	0	0.532	0.573
SLC4A9	SLC26A7	4449409	4438508	9606.ENSP00000427661	9606.ENSP00000309504	0	0	0	0	0	0	0	0.573	0.573
NEDD4L	SLC12A1	4446996	4446564	9606.ENSP00000383199	9606.ENSP00000379822	0	0	0	0	0	0.299	0	0.417	0.573
ABCB1	ALB	4451279	4437206	9606.ENSP00000478255	9606.ENSP00000295897	0	0	0	0	0.061	0	0	0.564	0.573
EVI2B	PLEK	4440484	4433624	9606.ENSP00000333779	9606.ENSP00000234313	0	0	0	0	0.557	0	0	0.074	0.573
FYB	FERMT3	4449385	4436340	9606.ENSP00000427114	9606.ENSP00000279227	0	0	0	0	0.289	0	0	0.424	0.573
SOSTDC1	FOXI1	4438091	4438038	9606.ENSP00000304930	9606.ENSP00000304286	0	0	0	0	0	0	0	0.573	0.573
TMEM72	TMEM207	4445863	4441675	9606.ENSP00000374234	9606.ENSP00000346981	0	0	0	0	0.106	0	0	0.543	0.573
C3	HRG	4433951	4433552	9606.ENSP00000245907	9606.ENSP00000232003	0	0	0	0	0.104	0	0	0.543	0.573
VEGFA	SLC16A1	4451310	4449975	9606.ENSP00000478570	9606.ENSP00000441065	0	0	0	0	0	0	0	0.573	0.573
APOC1	MSR1	4450772	4435004	9606.ENSP00000465356	9606.ENSP00000262101	0	0	0	0	0	0	0.54	0.111	0.573
FCER1G	PLEK	4436828	4433624	9606.ENSP00000289902	9606.ENSP00000234313	0	0	0	0	0.562	0	0	0.064	0.573
PDK1	EGFR	4446044	4436186	9606.ENSP00000376352	9606.ENSP00000275493	0	0	0	0	0	0.102	0	0.543	0.572
SLC30A2	MT1E	4444357	4438349	9606.ENSP00000363394	9606.ENSP00000307706	0	0	0	0	0.055	0	0	0.566	0.572
CA10	L1CAM	4448360	4443451	9606.ENSP00000405388	9606.ENSP00000359077	0	0	0	0	0.15	0.157	0	0.45	0.572
KNG1	PLAT	4435537	4433132	9606.ENSP00000265023	9606.ENSP00000220809	0	0	0	0	0	0	0	0.572	0.572
NR1I3	ABCC3	4442999	4436623	9606.ENSP00000356959	9606.ENSP00000285238	0	0	0	0	0.063	0	0	0.562	0.572
SEZ6L2	QPRT	4451623	4446401	9606.ENSP00000481917	9606.ENSP00000378782	0	0	0	0	0	0	0	0.572	0.572
SLIT2	EZH2	4449223	4439336	9606.ENSP00000422591	9606.ENSP00000320147	0	0	0	0	0	0.077	0	0.555	0.572
IDO1	TLR7	4449569	4445433	9606.ENSP00000430950	9606.ENSP00000370034	0	0	0	0	0	0	0	0.571	0.571
SLAMF8	TYROBP	4436821	4435115	9606.ENSP00000289707	9606.ENSP00000262629	0	0	0	0	0.563	0	0	0.058	0.571
SLC12A1	SCNN1B	4446564	4441549	9606.ENSP00000379822	9606.ENSP00000345751	0	0	0	0	0.061	0	0	0.561	0.571
SUCLG1	SLC4A11	4446196	4445316	9606.ENSP00000377446	9606.ENSP00000369399	0	0	0	0	0	0	0	0.571	0.571
UMOD	SHROOM3	4446508	4437225	9606.ENSP00000379438	9606.ENSP00000296043	0	0	0	0	0	0	0	0.571	0.571
FGF1	PGF	4451524	4450339	9606.ENSP00000480791	9606.ENSP00000451040	0	0	0	0	0	0	0	0.571	0.571
PLCG2	PTPRC	4451677	4448605	9606.ENSP00000482457	9606.ENSP00000411355	0	0	0	0	0.371	0.055	0	0.336	0.571
CD86	CD53	4440320	4435973	9606.ENSP00000332049	9606.ENSP00000271324	0	0	0	0	0.478	0	0	0.212	0.571
CYBB	ICAM1	4445083	4435501	9606.ENSP00000367851	9606.ENSP00000264832	0	0	0	0	0.088	0	0	0.548	0.57
TMEM72	TMEM52B	4445863	4445622	9606.ENSP00000374234	9606.ENSP00000371348	0	0	0	0	0	0	0	0.57	0.57
FYB	SLA	4449385	4447831	9606.ENSP00000427114	9606.ENSP00000394049	0	0	0	0	0.549	0	0	0.085	0.57
PTPRC	TLR3	4448605	4437339	9606.ENSP00000411355	9606.ENSP00000296795	0	0	0	0	0.064	0.063	0	0.55	0.57
NR3C2	WNK4	4442077	4434005	9606.ENSP00000350815	9606.ENSP00000246914	0	0	0	0	0.059	0	0	0.562	0.57
CXCR4	ANGPTL4	4447439	4437761	9606.ENSP00000386884	9606.ENSP00000301455	0	0	0	0	0	0	0	0.57	0.57
SLC22A7	SLC34A1	4443974	4439443	9606.ENSP00000361666	9606.ENSP00000321424	0	0	0	0	0.515	0	0	0.151	0.57
CALU	CYP4F2	4449856	4433177	9606.ENSP00000438248	9606.ENSP00000221700	0	0	0	0	0	0	0	0.57	0.57
COL4A1	LAMA4	4444632	4433505	9606.ENSP00000364979	9606.ENSP00000230538	0	0	0	0	0.202	0	0	0.483	0.57
SLC4A9	SLC26A4	4449409	4435634	9606.ENSP00000427661	9606.ENSP00000265715	0	0	0	0	0	0	0	0.57	0.57
PTPRC	MMP9	4448605	4443919	9606.ENSP00000411355	9606.ENSP00000361405	0	0	0	0	0.104	0	0	0.54	0.57
NUSAP1	CENPK	4450429	4446586	9606.ENSP00000453403	9606.ENSP00000379911	0	0	0	0	0.543	0	0	0.099	0.57
TLR7	GPR65	4445433	4435771	9606.ENSP00000370034	9606.ENSP00000267549	0	0	0	0	0.567	0	0	0.046	0.569
[truncated: 2,038 more rows]
