# Supplementary material for: Prediction and analysis of novel key genes ITGAX, LAPTM5, SERPINE1 in clear cell renal cell carcinoma through bioinformatics analysis
Source: PeerJ. 2021 Apr 20;9:e11272. doi: 10.7717/peerj.11272 (PMC8063882; doi:10.7717/peerj.11272)
Supplement: Supplemental Information 13 [file peerj-09-11272-s013.xlsx]

## Sheet: Figure 4B
#node1	node2	node1_string_internal_id	node2_string_internal_id	node1_external_id	node2_external_id	neighborhood_on_chromosome	gene_fusion	phylogenetic_cooccurrence	homology	coexpression	experimentally_determined_interaction	database_annotated	automated_textmining	combined_score
EGFR	EGF	4436186	4435570	9606.ENSP00000275493	9606.ENSP00000265171	0	0	0	0	0.16	0.933	0.9	0.972	0.999
ITGAX	ITGB2	4450468	4446737	9606.ENSP00000454623	9606.ENSP00000380948	0	0	0	0	0.41	0.905	0.9	0.579	0.997
MMP9	TIMP1	4443919	4433052	9606.ENSP00000361405	9606.ENSP00000218388	0	0	0	0	0.063	0.457	0.9	0.957	0.997
ERBB2	EGF	4435897	4435570	9606.ENSP00000269571	9606.ENSP00000265171	0	0	0	0	0.16	0.406	0.9	0.94	0.996
VEGFA	EGF	4451310	4435570	9606.ENSP00000478570	9606.ENSP00000265171	0	0	0	0	0	0	0.9	0.937	0.993
CAV1	EGFR	4440933	4436186	9606.ENSP00000339191	9606.ENSP00000275493	0	0	0	0	0.335	0.393	0.9	0.844	0.992
FN1	ALB	4441661	4437206	9606.ENSP00000346839	9606.ENSP00000295897	0	0	0	0	0.077	0.104	0.9	0.899	0.99
PTPRC	CXCR4	4448605	4447439	9606.ENSP00000411355	9606.ENSP00000386884	0	0	0	0	0.224	0.379	0.9	0.829	0.99
ITGB2	ICAM1	4446737	4435501	9606.ENSP00000380948	9606.ENSP00000264832	0	0	0	0	0.113	0.379	0.9	0.829	0.989
VEGFA	MMP9	4451310	4443919	9606.ENSP00000478570	9606.ENSP00000361405	0	0	0	0	0	0	0.8	0.946	0.989
FN1	EGF	4441661	4435570	9606.ENSP00000346839	9606.ENSP00000265171	0	0	0	0	0	0	0.9	0.888	0.988
VEGFA	FN1	4451310	4441661	9606.ENSP00000478570	9606.ENSP00000346839	0	0	0	0	0.076	0	0.9	0.88	0.988
VEGFA	ALB	4451310	4437206	9606.ENSP00000478570	9606.ENSP00000295897	0	0	0	0	0.062	0	0.9	0.871	0.986
C3AR1	C3	4437821	4433951	9606.ENSP00000302079	9606.ENSP00000245907	0	0	0	0	0.062	0.441	0.9	0.73	0.983
CCL5	CXCR4	4451102	4447439	9606.ENSP00000474412	9606.ENSP00000386884	0	0	0	0	0.061	0.05	0.9	0.832	0.983
ITGAX	ICAM1	4450468	4435501	9606.ENSP00000454623	9606.ENSP00000264832	0	0	0	0	0.084	0.17	0.9	0.799	0.982
VEGFA	SERPINE1	4451310	4433266	9606.ENSP00000478570	9606.ENSP00000223095	0	0	0	0	0.076	0	0.9	0.821	0.982
ALB	EGF	4437206	4435570	9606.ENSP00000295897	9606.ENSP00000265171	0	0	0	0	0	0	0.9	0.808	0.98
ALB	SERPINE1	4437206	4433266	9606.ENSP00000295897	9606.ENSP00000223095	0	0	0	0	0.077	0	0.9	0.795	0.979
HCK	ITGB2	4450141	4446737	9606.ENSP00000444986	9606.ENSP00000380948	0	0	0	0	0.708	0.184	0.9	0.235	0.979
FN1	SERPINE1	4441661	4433266	9606.ENSP00000346839	9606.ENSP00000223095	0	0	0	0	0.295	0	0.9	0.735	0.979
VEGFA	EGFR	4451310	4436186	9606.ENSP00000478570	9606.ENSP00000275493	0	0	0	0	0.089	0	0.6	0.947	0.979
EGF	SERPINE1	4435570	4433266	9606.ENSP00000265171	9606.ENSP00000223095	0	0	0	0	0	0	0.9	0.798	0.978
TYROBP	LCP2	4435115	4432628	9606.ENSP00000262629	9606.ENSP00000046794	0	0	0	0	0.571	0	0.9	0.522	0.977
ITGB2	CD53	4446737	4435973	9606.ENSP00000380948	9606.ENSP00000271324	0	0	0	0	0.671	0	0.9	0.348	0.976
HCK	EGFR	4450141	4436186	9606.ENSP00000444986	9606.ENSP00000275493	0	0	0	0.679	0	0.701	0.9	0.722	0.975
EGF	TIMP1	4435570	4433052	9606.ENSP00000265171	9606.ENSP00000218388	0	0	0	0	0	0	0.9	0.75	0.974
SERPINE1	TIMP1	4433266	4433052	9606.ENSP00000223095	9606.ENSP00000218388	0	0	0	0	0.174	0	0.9	0.712	0.974
VEGFA	TIMP1	4451310	4433052	9606.ENSP00000478570	9606.ENSP00000218388	0	0	0	0	0.084	0	0.9	0.731	0.973
VEGFA	KNG1	4451310	4435537	9606.ENSP00000478570	9606.ENSP00000265023	0	0	0	0	0	0	0.9	0.743	0.973
CAV1	EGF	4440933	4435570	9606.ENSP00000339191	9606.ENSP00000265171	0	0	0	0	0	0	0.9	0.746	0.973
FN1	TIMP1	4441661	4433052	9606.ENSP00000346839	9606.ENSP00000218388	0	0	0	0	0.11	0	0.9	0.712	0.972
ALB	C3	4437206	4433951	9606.ENSP00000295897	9606.ENSP00000245907	0	0	0	0	0.143	0	0.9	0.704	0.972
ALB	KNG1	4437206	4435537	9606.ENSP00000295897	9606.ENSP00000265023	0	0	0	0	0.202	0	0.9	0.67	0.971
EGFR	ERBB2	4436186	4435897	9606.ENSP00000275493	9606.ENSP00000269571	0	0	0	0.941	0.077	0.699	0.9	0.967	0.971
ITGB2	C3AR1	4446737	4437821	9606.ENSP00000380948	9606.ENSP00000302079	0	0	0	0	0.586	0	0.9	0.343	0.97
EGF	KNG1	4435570	4435537	9606.ENSP00000265171	9606.ENSP00000265023	0	0	0	0	0	0	0.9	0.714	0.97
HCK	FCGR2A	4450141	4435978	9606.ENSP00000444986	9606.ENSP00000271450	0	0	0	0	0.498	0.294	0.9	0.25	0.969
PTPRC	LCP2	4448605	4432628	9606.ENSP00000411355	9606.ENSP00000046794	0	0	0	0	0.915	0.379	0	0.473	0.969
KNG1	SERPINE1	4435537	4433266	9606.ENSP00000265023	9606.ENSP00000223095	0	0	0	0	0.055	0	0.9	0.703	0.969
FN1	C3	4441661	4433951	9606.ENSP00000346839	9606.ENSP00000245907	0	0	0	0	0.095	0.264	0.9	0.558	0.966
ITGB2	CYBB	4446737	4445083	9606.ENSP00000380948	9606.ENSP00000367851	0	0	0	0	0.577	0	0.9	0.25	0.965
CSF1R	TYROBP	4436666	4435115	9606.ENSP00000286301	9606.ENSP00000262629	0	0	0	0	0.925	0	0	0.539	0.964
TLR7	CTSS	4445433	4443237	9606.ENSP00000370034	9606.ENSP00000357981	0	0	0	0	0.554	0	0.9	0.25	0.963
ITGAX	CD86	4450468	4440320	9606.ENSP00000454623	9606.ENSP00000332049	0	0	0	0	0.286	0	0	0.942	0.957
ITGAX	C3	4450468	4433951	9606.ENSP00000454623	9606.ENSP00000245907	0	0	0	0	0.063	0.379	0.9	0.348	0.956
ALB	TIMP1	4437206	4433052	9606.ENSP00000295897	9606.ENSP00000218388	0	0	0	0	0	0	0.9	0.587	0.956
VEGFA	ERBB2	4451310	4435897	9606.ENSP00000478570	9606.ENSP00000269571	0	0	0	0	0	0	0.6	0.895	0.956
CYBB	CD53	4445083	4435973	9606.ENSP00000367851	9606.ENSP00000271324	0	0	0	0	0.488	0	0.9	0.199	0.955
KNG1	C3	4435537	4433951	9606.ENSP00000265023	9606.ENSP00000245907	0	0	0	0	0.094	0	0.9	0.54	0.954
VEGFA	KIT	4451310	4436763	9606.ENSP00000478570	9606.ENSP00000288135	0	0	0	0	0	0.174	0.6	0.87	0.953
FN1	KNG1	4441661	4435537	9606.ENSP00000346839	9606.ENSP00000265023	0	0	0	0	0.052	0	0.9	0.519	0.95
ITGB2	FCGR2A	4446737	4435978	9606.ENSP00000380948	9606.ENSP00000271450	0	0	0	0	0.327	0	0.9	0.287	0.947
FN1	EGFR	4441661	4436186	9606.ENSP00000346839	9606.ENSP00000275493	0	0	0	0	0.185	0.812	0	0.684	0.947
ITGB2	MMP9	4446737	4443919	9606.ENSP00000380948	9606.ENSP00000361405	0	0	0	0	0.281	0	0.9	0.316	0.946
CYBB	C3AR1	4445083	4437821	9606.ENSP00000367851	9606.ENSP00000302079	0	0	0	0	0.397	0	0.9	0.159	0.944
ITGB2	C3	4446737	4433951	9606.ENSP00000380948	9606.ENSP00000245907	0	0	0	0	0.063	0.294	0.9	0.255	0.944
ITGAX	CYBB	4450468	4445083	9606.ENSP00000454623	9606.ENSP00000367851	0	0	0	0	0.232	0	0.9	0.319	0.943
ITGB2	KNG1	4446737	4435537	9606.ENSP00000380948	9606.ENSP00000265023	0	0	0	0	0.061	0.379	0.9	0.123	0.942
C3AR1	CD53	4437821	4435973	9606.ENSP00000302079	9606.ENSP00000271324	0	0	0	0	0.336	0	0.9	0.167	0.939
HCK	EGF	4450141	4435570	9606.ENSP00000444986	9606.ENSP00000265171	0	0	0	0	0	0.05	0.9	0.4	0.938
ITGAX	CD53	4450468	4435973	9606.ENSP00000454623	9606.ENSP00000271324	0	0	0	0	0.285	0.064	0.9	0.184	0.938
MMP9	CTSS	4443919	4443237	9606.ENSP00000361405	9606.ENSP00000357981	0	0	0	0	0.134	0	0.9	0.319	0.935
CCL5	C3AR1	4451102	4437821	9606.ENSP00000474412	9606.ENSP00000302079	0	0	0	0	0.116	0	0.9	0.326	0.935
CCL5	C3	4451102	4433951	9606.ENSP00000474412	9606.ENSP00000245907	0	0	0	0	0.063	0	0.9	0.356	0.934
ITGAX	PTPRC	4450468	4448605	9606.ENSP00000454623	9606.ENSP00000411355	0	0	0	0	0.292	0.081	0	0.899	0.929
KIT	EGF	4436763	4435570	9606.ENSP00000288135	9606.ENSP00000265171	0	0	0	0	0	0.062	0.8	0.644	0.927
CXCR4	KNG1	4447439	4435537	9606.ENSP00000386884	9606.ENSP00000265023	0	0	0	0	0	0	0.9	0.291	0.926
CCL5	KNG1	4451102	4435537	9606.ENSP00000474412	9606.ENSP00000265023	0	0	0	0	0	0	0.9	0.284	0.925
KNG1	TIMP1	4435537	4433052	9606.ENSP00000265023	9606.ENSP00000218388	0	0	0	0	0	0	0.9	0.247	0.921
CXCR4	C3	4447439	4433951	9606.ENSP00000386884	9606.ENSP00000245907	0	0	0	0	0	0	0.9	0.244	0.921
C3	TIMP1	4433951	4433052	9606.ENSP00000245907	9606.ENSP00000218388	0	0	0	0	0	0	0.9	0.249	0.921
HCK	PTPRC	4450141	4448605	9606.ENSP00000444986	9606.ENSP00000411355	0	0	0	0	0.384	0.16	0.8	0.315	0.919
EGFR	CCND1	4436186	4433391	9606.ENSP00000275493	9606.ENSP00000227507	0	0	0	0	0.2	0.157	0	0.886	0.917
C3AR1	KNG1	4437821	4435537	9606.ENSP00000302079	9606.ENSP00000265023	0	0	0	0	0	0	0.9	0.19	0.915
CXCR4	C3AR1	4447439	4437821	9606.ENSP00000386884	9606.ENSP00000302079	0	0	0	0.65	0.076	0	0.9	0.291	0.912
LAPTM5	CD53	4437079	4435973	9606.ENSP00000294507	9606.ENSP00000271324	0	0	0	0	0.816	0	0	0.532	0.91
ITGB2	TYROBP	4446737	4435115	9606.ENSP00000380948	9606.ENSP00000262629	0	0	0	0	0.852	0	0	0.377	0.903
CYBB	MMP9	4445083	4443919	9606.ENSP00000367851	9606.ENSP00000361405	0	0	0	0	0.17	0	0.65	0.695	0.903
FN1	LOX	4441661	4433517	9606.ENSP00000346839	9606.ENSP00000231004	0	0	0	0	0.36	0.305	0	0.789	0.898
VEGFA	ICAM1	4451310	4435501	9606.ENSP00000478570	9606.ENSP00000264832	0	0	0	0	0	0	0	0.89	0.89
ERBB2	CCND1	4435897	4433391	9606.ENSP00000269571	9606.ENSP00000227507	0	0	0	0	0.098	0.43	0	0.799	0.888
VEGFA	CSF1R	4451310	4436666	9606.ENSP00000478570	9606.ENSP00000286301	0	0	0	0	0	0.174	0.6	0.67	0.881
PTPRC	KIT	4448605	4436763	9606.ENSP00000411355	9606.ENSP00000288135	0	0	0	0	0	0.094	0	0.874	0.881
CD86	TLR2	4440320	4434743	9606.ENSP00000332049	9606.ENSP00000260010	0	0	0	0	0.288	0	0	0.839	0.881
PTPRC	ITGB2	4448605	4446737	9606.ENSP00000411355	9606.ENSP00000380948	0	0	0	0	0.763	0.185	0	0.429	0.88
ITGB2	LAPTM5	4446737	4437079	9606.ENSP00000380948	9606.ENSP00000294507	0	0	0	0	0.847	0	0	0.25	0.88
VEGFA	CXCR4	4451310	4447439	9606.ENSP00000478570	9606.ENSP00000386884	0	0	0	0	0	0	0	0.878	0.879
HCK	TYROBP	4450141	4435115	9606.ENSP00000444986	9606.ENSP00000262629	0	0	0	0	0.804	0	0	0.403	0.878
PLEK	LCP2	4433624	4432628	9606.ENSP00000234313	9606.ENSP00000046794	0	0	0	0	0.765	0	0	0.473	0.871
MMP9	EGF	4443919	4435570	9606.ENSP00000361405	9606.ENSP00000265171	0	0	0	0	0	0	0	0.871	0.871
VEGFA	CCL5	4451310	4451102	9606.ENSP00000478570	9606.ENSP00000474412	0	0	0	0	0	0	0	0.865	0.865
LAPTM5	TYROBP	4437079	4435115	9606.ENSP00000294507	9606.ENSP00000262629	0	0	0	0	0.795	0	0	0.349	0.861
PTPRC	CSF1R	4448605	4436666	9606.ENSP00000411355	9606.ENSP00000286301	0	0	0	0	0.537	0.094	0	0.693	0.86
ITGAX	FCGR2A	4450468	4435978	9606.ENSP00000454623	9606.ENSP00000271450	0	0	0	0	0.311	0	0	0.794	0.852
CCL5	ICAM1	4451102	4435501	9606.ENSP00000474412	9606.ENSP00000264832	0	0	0	0	0.08	0	0	0.84	0.847
PTPRC	CD86	4448605	4440320	9606.ENSP00000411355	9606.ENSP00000332049	0	0	0	0	0.37	0	0	0.763	0.845
EGF	CCND1	4435570	4433391	9606.ENSP00000265171	9606.ENSP00000227507	0	0	0	0	0	0	0	0.844	0.844
ITGB2	CTSS	4446737	4443237	9606.ENSP00000380948	9606.ENSP00000357981	0	0	0	0	0.747	0	0	0.399	0.841
ITGB2	PLEK	4446737	4433624	9606.ENSP00000380948	9606.ENSP00000234313	0	0	0	0	0.795	0	0	0.255	0.84
PTPRC	FCGR2A	4448605	4435978	9606.ENSP00000411355	9606.ENSP00000271450	0	0	0	0	0.259	0	0	0.792	0.839
TYROBP	TLR2	4435115	4434743	9606.ENSP00000262629	9606.ENSP00000260010	0	0	0	0	0.69	0	0	0.49	0.835
MMP9	EGFR	4443919	4436186	9606.ENSP00000361405	9606.ENSP00000275493	0	0	0	0	0	0	0	0.828	0.828
CXCR4	KIT	4447439	4436763	9606.ENSP00000386884	9606.ENSP00000288135	0	0	0	0	0	0.05	0	0.825	0.827
ITGB2	CSF1R	4446737	4436666	9606.ENSP00000380948	9606.ENSP00000286301	0	0	0	0	0.77	0.085	0	0.225	0.823
PTPRC	CD53	4448605	4435973	9606.ENSP00000411355	9606.ENSP00000271324	0	0	0	0	0.708	0.084	0	0.389	0.822
ITGB2	LCP2	4446737	4432628	9606.ENSP00000380948	9606.ENSP00000046794	0	0	0	0	0.744	0	0	0.323	0.819
FN1	ICAM1	4441661	4435501	9606.ENSP00000346839	9606.ENSP00000264832	0	0	0	0	0.063	0	0	0.814	0.819
CAV1	ERBB2	4440933	4435897	9606.ENSP00000339191	9606.ENSP00000269571	0	0	0	0	0.06	0.379	0	0.705	0.813
ALB	ICAM1	4437206	4435501	9606.ENSP00000295897	9606.ENSP00000264832	0	0	0	0	0	0	0	0.806	0.807
CTSS	LAPTM5	4443237	4437079	9606.ENSP00000357981	9606.ENSP00000294507	0	0	0	0	0.689	0	0	0.399	0.805
CSF1R	EGF	4436666	4435570	9606.ENSP00000286301	9606.ENSP00000265171	0	0	0	0	0.061	0.062	0.6	0.51	0.804
LAPTM5	PLEK	4437079	4433624	9606.ENSP00000294507	9606.ENSP00000234313	0	0	0	0	0.776	0	0	0.154	0.803
CCL5	MMP9	4451102	4443919	9606.ENSP00000474412	9606.ENSP00000361405	0	0	0	0	0.076	0	0	0.792	0.801
CD86	ICAM1	4440320	4435501	9606.ENSP00000332049	9606.ENSP00000264832	0	0	0	0	0.09	0	0	0.789	0.799
PTPRC	ALB	4448605	4437206	9606.ENSP00000411355	9606.ENSP00000295897	0	0	0	0	0	0	0	0.799	0.799
MMP9	TLR2	4443919	4434743	9606.ENSP00000361405	9606.ENSP00000260010	0	0	0	0	0.165	0	0	0.769	0.799
CTSS	TYROBP	4443237	4435115	9606.ENSP00000357981	9606.ENSP00000262629	0	0	0	0	0.723	0	0	0.293	0.796
PTPRC	PLEK	4448605	4433624	9606.ENSP00000411355	9606.ENSP00000234313	0	0	0	0	0.746	0	0	0.21	0.791
ITGAX	CSF1R	4450468	4436666	9606.ENSP00000454623	9606.ENSP00000286301	0	0	0	0	0.23	0	0	0.739	0.791
CD86	FCGR2A	4440320	4435978	9606.ENSP00000332049	9606.ENSP00000271450	0	0	0	0	0.265	0	0	0.721	0.786
TLR7	CD86	4445433	4440320	9606.ENSP00000370034	9606.ENSP00000332049	0	0	0	0	0.292	0	0	0.71	0.786
PTPRC	TLR7	4448605	4445433	9606.ENSP00000411355	9606.ENSP00000370034	0	0	0	0	0.533	0.063	0	0.549	0.785
VEGFA	CCND1	4451310	4433391	9606.ENSP00000478570	9606.ENSP00000227507	0	0	0	0	0.069	0.17	0	0.743	0.784
TYROBP	PLEK	4435115	4433624	9606.ENSP00000262629	9606.ENSP00000234313	0	0	0	0	0.752	0	0	0.151	0.781
MMP9	ERBB2	4443919	4435897	9606.ENSP00000361405	9606.ENSP00000269571	0	0	0	0	0	0	0	0.78	0.781
CXCR4	MMP9	4447439	4443919	9606.ENSP00000386884	9606.ENSP00000361405	0	0	0	0	0.076	0.064	0	0.766	0.78
VEGFA	CAV1	4451310	4440933	9606.ENSP00000478570	9606.ENSP00000339191	0	0	0	0	0.076	0	0	0.772	0.78
FCGR2A	TYROBP	4435978	4435115	9606.ENSP00000271450	9606.ENSP00000262629	0	0	0	0	0.694	0	0	0.311	0.78
CXCR4	EGF	4447439	4435570	9606.ENSP00000386884	9606.ENSP00000265171	0	0	0	0	0	0.062	0	0.77	0.776
HCK	PLEK	4450141	4433624	9606.ENSP00000444986	9606.ENSP00000234313	0	0	0	0	0.685	0	0	0.31	0.773
CXCR4	EGFR	4447439	4436186	9606.ENSP00000386884	9606.ENSP00000275493	0	0	0	0	0	0.084	0	0.759	0.771
ITGAX	TLR2	4450468	4434743	9606.ENSP00000454623	9606.ENSP00000260010	0	0	0	0	0.23	0.055	0	0.708	0.769
CTSS	CSF1R	4443237	4436666	9606.ENSP00000357981	9606.ENSP00000286301	0	0	0	0	0.719	0	0	0.21	0.769
PTPRC	FN1	4448605	4441661	9606.ENSP00000411355	9606.ENSP00000346839	0	0	0	0	0.062	0.29	0	0.68	0.768
ALB	EGFR	4437206	4436186	9606.ENSP00000295897	9606.ENSP00000275493	0	0	0	0	0.061	0	0	0.762	0.767
MMP9	CCND1	4443919	4433391	9606.ENSP00000361405	9606.ENSP00000227507	0	0	0	0	0	0	0	0.765	0.765
CD53	LCP2	4435973	4432628	9606.ENSP00000271324	9606.ENSP00000046794	0	0	0	0	0.706	0	0	0.207	0.757
CD53	PLEK	4435973	4433624	9606.ENSP00000271324	9606.ENSP00000234313	0	0	0	0	0.729	0	0	0.138	0.756
CAV1	CCND1	4440933	4433391	9606.ENSP00000339191	9606.ENSP00000227507	0	0	0	0	0.214	0	0	0.697	0.752
CXCR4	ERBB2	4447439	4435897	9606.ENSP00000386884	9606.ENSP00000269571	0	0	0	0	0	0.084	0	0.74	0.752
TLR7	CSF1R	4445433	4436666	9606.ENSP00000370034	9606.ENSP00000286301	0	0	0	0	0.559	0.089	0	0.424	0.748
PTPRC	CTSS	4448605	4443237	9606.ENSP00000411355	9606.ENSP00000357981	0	0	0	0	0.703	0	0	0.178	0.746
CTSS	CD53	4443237	4435973	9606.ENSP00000357981	9606.ENSP00000271324	0	0	0	0	0.656	0	0	0.285	0.743
ITGAX	TLR7	4450468	4445433	9606.ENSP00000454623	9606.ENSP00000370034	0	0	0	0	0.159	0.055	0	0.7	0.74
MMP9	ALB	4443919	4437206	9606.ENSP00000361405	9606.ENSP00000295897	0	0	0	0	0.061	0	0	0.732	0.738
MMP9	ICAM1	4443919	4435501	9606.ENSP00000361405	9606.ENSP00000264832	0	0	0	0	0.093	0	0	0.722	0.737
CD86	C3AR1	4440320	4437821	9606.ENSP00000332049	9606.ENSP00000302079	0	0	0	0	0.428	0	0	0.557	0.736
EGF	ICAM1	4435570	4435501	9606.ENSP00000265171	9606.ENSP00000264832	0	0	0	0	0	0	0	0.732	0.732
ITGAX	TYROBP	4450468	4435115	9606.ENSP00000454623	9606.ENSP00000262629	0	0	0	0	0.564	0	0	0.408	0.731
VEGFA	TLR2	4451310	4434743	9606.ENSP00000478570	9606.ENSP00000260010	0	0	0	0	0	0	0	0.731	0.731
CCL5	TLR2	4451102	4434743	9606.ENSP00000474412	9606.ENSP00000260010	0	0	0	0	0.137	0	0	0.7	0.73
CSF1R	PLEK	4436666	4433624	9606.ENSP00000286301	9606.ENSP00000234313	0	0	0	0	0.675	0	0	0.187	0.725
EGFR	LOX	4436186	4433517	9606.ENSP00000275493	9606.ENSP00000231004	0	0	0	0	0.196	0	0	0.671	0.724
CXCR4	TLR2	4447439	4434743	9606.ENSP00000386884	9606.ENSP00000260010	0	0	0	0	0.076	0.379	0	0.557	0.723
HCK	TLR2	4450141	4434743	9606.ENSP00000444986	9606.ENSP00000260010	0	0	0	0	0.576	0.123	0	0.297	0.716
EGFR	SERPINE1	4436186	4433266	9606.ENSP00000275493	9606.ENSP00000223095	0	0	0	0	0.125	0	0	0.687	0.715
MMP9	SERPINE1	4443919	4433266	9606.ENSP00000361405	9606.ENSP00000223095	0	0	0	0	0.061	0	0	0.707	0.714
CCL5	ITGAX	4451102	4450468	9606.ENSP00000474412	9606.ENSP00000454623	0	0	0	0	0.2	0	0	0.653	0.711
C3AR1	CSF1R	4437821	4436666	9606.ENSP00000302079	9606.ENSP00000286301	0	0	0	0	0.63	0	0	0.243	0.708
HCK	LCP2	4450141	4432628	9606.ENSP00000444986	9606.ENSP00000046794	0	0	0	0	0.393	0.227	0	0.426	0.707
ALB	KIT	4437206	4436763	9606.ENSP00000295897	9606.ENSP00000288135	0	0	0	0	0	0	0	0.706	0.706
ITGB2	TLR2	4446737	4434743	9606.ENSP00000380948	9606.ENSP00000260010	0	0	0	0	0.552	0.062	0	0.353	0.704
CSF1R	FCGR2A	4436666	4435978	9606.ENSP00000286301	9606.ENSP00000271450	0	0	0	0	0.393	0	0	0.53	0.703
CD86	TYROBP	4440320	4435115	9606.ENSP00000332049	9606.ENSP00000262629	0	0	0	0	0.549	0	0	0.369	0.703
CD86	CSF1R	4440320	4436666	9606.ENSP00000332049	9606.ENSP00000286301	0	0	0	0	0.352	0	0	0.559	0.702
PTPRC	ICAM1	4448605	4435501	9606.ENSP00000411355	9606.ENSP00000264832	0	0	0	0	0.095	0	0	0.684	0.702
ICAM1	SERPINE1	4435501	4433266	9606.ENSP00000264832	9606.ENSP00000223095	0	0	0	0	0.088	0	0	0.683	0.698
CTSS	LCP2	4443237	4432628	9606.ENSP00000357981	9606.ENSP00000046794	0	0	0	0	0.692	0	0	0.056	0.697
FN1	CAV1	4441661	4440933	9606.ENSP00000346839	9606.ENSP00000339191	0	0	0	0	0.286	0	0	0.593	0.697
CCL5	TLR7	4451102	4445433	9606.ENSP00000474412	9606.ENSP00000370034	0	0	0	0	0.11	0	0	0.669	0.692
CCL5	CD86	4451102	4440320	9606.ENSP00000474412	9606.ENSP00000332049	0	0	0	0	0.152	0	0	0.651	0.691
FCGR2A	TLR2	4435978	4434743	9606.ENSP00000271450	9606.ENSP00000260010	0	0	0	0	0.336	0	0	0.553	0.69
CXCR4	CCND1	4447439	4433391	9606.ENSP00000386884	9606.ENSP00000227507	0	0	0	0	0	0	0	0.689	0.689
ITGAX	KIT	4450468	4436763	9606.ENSP00000454623	9606.ENSP00000288135	0	0	0	0	0	0	0	0.688	0.688
CCND1	TIMP1	4433391	4433052	9606.ENSP00000227507	9606.ENSP00000218388	0	0	0	0	0.081	0	0	0.673	0.686
ICAM1	TLR2	4435501	4434743	9606.ENSP00000264832	9606.ENSP00000260010	0	0	0	0	0.088	0	0	0.669	0.685
CXCR4	FN1	4447439	4441661	9606.ENSP00000386884	9606.ENSP00000346839	0	0	0	0	0	0	0	0.683	0.683
ALB	ERBB2	4437206	4435897	9606.ENSP00000295897	9606.ENSP00000269571	0	0	0	0	0	0	0	0.683	0.683
PTPRC	TLR2	4448605	4434743	9606.ENSP00000411355	9606.ENSP00000260010	0	0	0	0	0.269	0.063	0	0.573	0.682
PTPRC	LAPTM5	4448605	4437079	9606.ENSP00000411355	9606.ENSP00000294507	0	0	0	0	0.64	0	0	0.145	0.679
VEGFA	PTPRC	4451310	4448605	9606.ENSP00000478570	9606.ENSP00000411355	0	0	0	0	0	0	0	0.678	0.678
CCL5	PTPRC	4451102	4448605	9606.ENSP00000474412	9606.ENSP00000411355	0	0	0	0	0.223	0	0	0.602	0.678
FN1	CCND1	4441661	4433391	9606.ENSP00000346839	9606.ENSP00000227507	0	0	0	0	0.183	0	0	0.606	0.664
CXCR4	ICAM1	4447439	4435501	9606.ENSP00000386884	9606.ENSP00000264832	0	0	0	0	0.061	0	0	0.656	0.664
C3AR1	PLEK	4437821	4433624	9606.ENSP00000302079	9606.ENSP00000234313	0	0	0	0	0.661	0	0	0	0.661
CYBB	TLR2	4445083	4434743	9606.ENSP00000367851	9606.ENSP00000260010	0	0	0	0	0.247	0.096	0	0.541	0.661
EGFR	TLR2	4436186	4434743	9606.ENSP00000275493	9606.ENSP00000260010	0	0	0	0	0	0.417	0	0.44	0.659
CSF1R	TLR2	4436666	4434743	9606.ENSP00000286301	9606.ENSP00000260010	0	0	0	0	0.347	0.089	0	0.473	0.659
ITGB2	TLR7	4446737	4445433	9606.ENSP00000380948	9606.ENSP00000370034	0	0	0	0	0.54	0.062	0	0.267	0.656
CAV1	ICAM1	4440933	4435501	9606.ENSP00000339191	9606.ENSP00000264832	0	0	0	0	0	0	0	0.656	0.656
CD53	TYROBP	4435973	4435115	9606.ENSP00000271324	9606.ENSP00000262629	0	0	0	0	0.563	0	0	0.244	0.655
LAPTM5	LCP2	4437079	4432628	9606.ENSP00000294507	9606.ENSP00000046794	0	0	0	0	0.593	0	0	0.186	0.654
C3AR1	TYROBP	4437821	4435115	9606.ENSP00000302079	9606.ENSP00000262629	0	0	0	0	0.568	0	0	0.213	0.646
PTPRC	TYROBP	4448605	4435115	9606.ENSP00000411355	9606.ENSP00000262629	0	0	0	0	0.425	0	0	0.405	0.644
PTPRC	CYBB	4448605	4445083	9606.ENSP00000411355	9606.ENSP00000367851	0	0	0	0	0.466	0	0	0.357	0.642
CYBB	CD86	4445083	4440320	9606.ENSP00000367851	9606.ENSP00000332049	0	0	0	0	0.54	0	0	0.251	0.641
CCL5	CYBB	4451102	4445083	9606.ENSP00000474412	9606.ENSP00000367851	0	0	0	0	0.118	0	0	0.608	0.64
ITGB2	CD86	4446737	4440320	9606.ENSP00000380948	9606.ENSP00000332049	0	0	0	0	0.432	0	0	0.39	0.638
CSF1R	LCP2	4436666	4432628	9606.ENSP00000286301	9606.ENSP00000046794	0	0	0	0	0.544	0	0	0.237	0.637
ALB	CCND1	4437206	4433391	9606.ENSP00000295897	9606.ENSP00000227507	0	0	0	0	0	0	0	0.636	0.636
CXCR4	ALB	4447439	4437206	9606.ENSP00000386884	9606.ENSP00000295897	0	0	0	0	0	0	0	0.635	0.635
HCK	CSF1R	4450141	4436666	9606.ENSP00000444986	9606.ENSP00000286301	0	0	0	0.713	0.567	0.096	0	0.378	0.633
TLR7	PLEK	4445433	4433624	9606.ENSP00000370034	9606.ENSP00000234313	0	0	0	0	0.587	0	0	0.146	0.632
ITGAX	ALB	4450468	4437206	9606.ENSP00000454623	9606.ENSP00000295897	0	0	0	0	0	0	0	0.63	0.63
TLR2	SERPINE1	4434743	4433266	9606.ENSP00000260010	9606.ENSP00000223095	0	0	0	0	0.061	0	0	0.619	0.627
CXCR4	CD86	4447439	4440320	9606.ENSP00000386884	9606.ENSP00000332049	0	0	0	0	0.137	0	0	0.584	0.626
CYBB	PLEK	4445083	4433624	9606.ENSP00000367851	9606.ENSP00000234313	0	0	0	0	0.584	0	0	0.136	0.625
CTSS	PLEK	4443237	4433624	9606.ENSP00000357981	9606.ENSP00000234313	0	0	0	0	0.608	0	0	0.073	0.621
ALB	TLR2	4437206	4434743	9606.ENSP00000295897	9606.ENSP00000260010	0	0	0	0	0	0	0	0.621	0.621
ICAM1	TIMP1	4435501	4433052	9606.ENSP00000264832	9606.ENSP00000218388	0	0	0	0	0.098	0	0	0.595	0.619
CD86	ALB	4440320	4437206	9606.ENSP00000332049	9606.ENSP00000295897	0	0	0	0	0	0	0	0.618	0.618
FN1	ERBB2	4441661	4435897	9606.ENSP00000346839	9606.ENSP00000269571	0	0	0	0	0.088	0	0	0.596	0.616
TLR7	CYBB	4445433	4445083	9606.ENSP00000370034	9606.ENSP00000367851	0	0	0	0	0.321	0.096	0	0.42	0.613
VEGFA	LOX	4451310	4433517	9606.ENSP00000478570	9606.ENSP00000231004	0	0	0	0	0.087	0	0	0.588	0.607
CAV1	ALB	4440933	4437206	9606.ENSP00000339191	9606.ENSP00000295897	0	0	0	0	0	0	0	0.604	0.604
CCL5	ALB	4451102	4437206	9606.ENSP00000474412	9606.ENSP00000295897	0	0	0	0	0	0	0	0.602	0.602
TLR7	FCGR2A	4445433	4435978	9606.ENSP00000370034	9606.ENSP00000271450	0	0	0	0	0.152	0	0	0.548	0.6
MMP9	FN1	4443919	4441661	9606.ENSP00000361405	9606.ENSP00000346839	0	0	0	0.601	0	0.379	0	0.894	0.599
CYBB	CAV1	4445083	4440933	9606.ENSP00000367851	9606.ENSP00000339191	0	0	0	0	0	0	0	0.598	0.598
PTPRC	EGF	4448605	4435570	9606.ENSP00000411355	9606.ENSP00000265171	0	0	0	0	0	0	0	0.595	0.595
CYBB	TYROBP	4445083	4435115	9606.ENSP00000367851	9606.ENSP00000262629	0	0	0	0	0.56	0	0	0.116	0.595
CYBB	CSF1R	4445083	4436666	9606.ENSP00000367851	9606.ENSP00000286301	0	0	0	0	0.467	0	0	0.268	0.593
KNG1	TLR2	4435537	4434743	9606.ENSP00000265023	9606.ENSP00000260010	0	0	0	0	0.061	0	0	0.581	0.59
CCL5	TIMP1	4451102	4433052	9606.ENSP00000474412	9606.ENSP00000218388	0	0	0	0	0	0	0	0.589	0.589
CD86	PLEK	4440320	4433624	9606.ENSP00000332049	9606.ENSP00000234313	0	0	0	0	0.55	0	0	0.124	0.589
ALB	LOX	4437206	4433517	9606.ENSP00000295897	9606.ENSP00000231004	0	0	0	0	0.063	0	0	0.578	0.588
KIT	CCND1	4436763	4433391	9606.ENSP00000288135	9606.ENSP00000227507	0	0	0	0	0.051	0	0	0.584	0.588
CAV1	SERPINE1	4440933	4433266	9606.ENSP00000339191	9606.ENSP00000223095	0	0	0	0	0.314	0	0	0.422	0.586
TLR7	C3AR1	4445433	4437821	9606.ENSP00000370034	9606.ENSP00000302079	0	0	0	0	0.387	0	0	0.349	0.584
LOX	TIMP1	4433517	4433052	9606.ENSP00000231004	9606.ENSP00000218388	0	0	0	0	0.184	0	0	0.51	0.583
C3AR1	TLR2	4437821	4434743	9606.ENSP00000302079	9606.ENSP00000260010	0	0	0	0	0.308	0	0	0.421	0.582
CCL5	EGF	4451102	4435570	9606.ENSP00000474412	9606.ENSP00000265171	0	0	0	0	0	0	0	0.581	0.581
FN1	TLR2	4441661	4434743	9606.ENSP00000346839	9606.ENSP00000260010	0	0	0	0	0.062	0	0	0.57	0.579
MMP9	LOX	4443919	4433517	9606.ENSP00000361405	9606.ENSP00000231004	0	0	0	0	0.061	0	0	0.571	0.579
TLR7	ICAM1	4445433	4435501	9606.ENSP00000370034	9606.ENSP00000264832	0	0	0	0	0.084	0	0	0.56	0.579
FN1	KIT	4441661	4436763	9606.ENSP00000346839	9606.ENSP00000288135	0	0	0	0	0.061	0	0	0.569	0.578
HCK	FN1	4450141	4441661	9606.ENSP00000444986	9606.ENSP00000346839	0	0	0	0	0.061	0.332	0	0.382	0.578
KIT	FCGR2A	4436763	4435978	9606.ENSP00000288135	9606.ENSP00000271450	0	0	0	0	0.061	0	0	0.568	0.577
LOX	SERPINE1	4433517	4433266	9606.ENSP00000231004	9606.ENSP00000223095	0	0	0	0	0.305	0	0	0.413	0.575
CD86	CD53	4440320	4435973	9606.ENSP00000332049	9606.ENSP00000271324	0	0	0	0	0.478	0	0	0.212	0.571
CYBB	ICAM1	4445083	4435501	9606.ENSP00000367851	9606.ENSP00000264832	0	0	0	0	0.088	0	0	0.548	0.57
PTPRC	MMP9	4448605	4443919	9606.ENSP00000411355	9606.ENSP00000361405	0	0	0	0	0.104	0	0	0.54	0.57
ITGAX	CXCR4	4450468	4447439	9606.ENSP00000454623	9606.ENSP00000386884	0	0	0	0	0.083	0	0	0.549	0.569
TLR7	TYROBP	4445433	4435115	9606.ENSP00000370034	9606.ENSP00000262629	0	0	0	0	0.217	0	0	0.473	0.569
PTPRC	ERBB2	4448605	4435897	9606.ENSP00000411355	9606.ENSP00000269571	0	0	0	0	0	0.153	0	0.511	0.568
CXCR4	CAV1	4447439	4440933	9606.ENSP00000386884	9606.ENSP00000339191	0	0	0	0	0	0.313	0	0.398	0.568
HCK	LAPTM5	4450141	4437079	9606.ENSP00000444986	9606.ENSP00000294507	0	0	0	0	0.563	0	0	0.046	0.565
TLR7	LCP2	4445433	4432628	9606.ENSP00000370034	9606.ENSP00000046794	0	0	0	0	0.515	0	0	0.139	0.565
HCK	CYBB	4450141	4445083	9606.ENSP00000444986	9606.ENSP00000367851	0	0	0	0	0.48	0.079	0	0.164	0.564
CTSS	C3AR1	4443237	4437821	9606.ENSP00000357981	9606.ENSP00000302079	0	0	0	0	0.425	0	0	0.266	0.56
MMP9	CSF1R	4443919	4436666	9606.ENSP00000361405	9606.ENSP00000286301	0	0	0	0	0.168	0	0	0.492	0.559
HCK	CD53	4450141	4435973	9606.ENSP00000444986	9606.ENSP00000271324	0	0	0	0	0.534	0	0	0.091	0.558
EGF	PLEK	4435570	4433624	9606.ENSP00000265171	9606.ENSP00000234313	0	0	0	0	0	0	0	0.558	0.558
CAV1	LOX	4440933	4433517	9606.ENSP00000339191	9606.ENSP00000231004	0	0	0	0	0.342	0	0	0.355	0.557
LAPTM5	CSF1R	4437079	4436666	9606.ENSP00000294507	9606.ENSP00000286301	0	0	0	0	0.527	0	0	0.101	0.557
CCL5	FN1	4451102	4441661	9606.ENSP00000474412	9606.ENSP00000346839	0	0	0	0	0	0	0	0.556	0.556
ALB	FCGR2A	4437206	4435978	9606.ENSP00000295897	9606.ENSP00000271450	0	0	0	0	0	0	0	0.555	0.555
CXCR4	TLR7	4447439	4445433	9606.ENSP00000386884	9606.ENSP00000370034	0	0	0	0	0.086	0	0	0.529	0.551
CD86	LCP2	4440320	4432628	9606.ENSP00000332049	9606.ENSP00000046794	0	0	0	0	0.395	0	0	0.286	0.549
C3AR1	LAPTM5	4437821	4437079	9606.ENSP00000302079	9606.ENSP00000294507	0	0	0	0	0.543	0	0	0.046	0.545
CTSS	TLR2	4443237	4434743	9606.ENSP00000357981	9606.ENSP00000260010	0	0	0	0	0.411	0	0	0.258	0.545
FCGR2A	ICAM1	4435978	4435501	9606.ENSP00000271450	9606.ENSP00000264832	0	0	0	0	0.07	0	0	0.53	0.544
CCL5	CCND1	4451102	4433391	9606.ENSP00000474412	9606.ENSP00000227507	0	0	0	0	0	0	0	0.542	0.542
CAV1	CSF1R	4440933	4436666	9606.ENSP00000339191	9606.ENSP00000286301	0	0	0	0	0	0	0	0.541	0.541
TLR2	C3	4434743	4433951	9606.ENSP00000260010	9606.ENSP00000245907	0	0	0	0	0.064	0	0	0.53	0.541
EGFR	ICAM1	4436186	4435501	9606.ENSP00000275493	9606.ENSP00000264832	0	0	0	0	0	0.112	0	0.502	0.539
PTPRC	EGFR	4448605	4436186	9606.ENSP00000411355	9606.ENSP00000275493	0	0	0	0	0	0.153	0	0.477	0.538
ITGB2	EGFR	4446737	4436186	9606.ENSP00000380948	9606.ENSP00000275493	0	0	0	0	0.051	0.42	0	0.225	0.537
VEGFA	CD86	4451310	4440320	9606.ENSP00000478570	9606.ENSP00000332049	0	0	0	0	0	0	0	0.53	0.53
VEGFA	CYBB	4451310	4445083	9606.ENSP00000478570	9606.ENSP00000367851	0	0	0	0	0	0	0	0.53	0.53
TLR7	ALB	4445433	4437206	9606.ENSP00000370034	9606.ENSP00000295897	0	0	0	0	0	0	0	0.53	0.53
CYBB	LAPTM5	4445083	4437079	9606.ENSP00000367851	9606.ENSP00000294507	0	0	0	0	0.472	0	0	0.145	0.529
C3AR1	LCP2	4437821	4432628	9606.ENSP00000302079	9606.ENSP00000046794	0	0	0	0	0.527	0	0	0	0.527
VEGFA	TLR7	4451310	4445433	9606.ENSP00000478570	9606.ENSP00000370034	0	0	0	0	0	0	0	0.527	0.527
CYBB	ALB	4445083	4437206	9606.ENSP00000367851	9606.ENSP00000295897	0	0	0	0	0	0	0	0.525	0.525
HCK	C3AR1	4450141	4437821	9606.ENSP00000444986	9606.ENSP00000302079	0	0	0	0	0.489	0	0	0.093	0.517
MMP9	KIT	4443919	4436763	9606.ENSP00000361405	9606.ENSP00000288135	0	0	0	0	0	0	0	0.511	0.511
CYBB	LCP2	4445083	4432628	9606.ENSP00000367851	9606.ENSP00000046794	0	0	0	0	0.481	0	0	0.096	0.511
EGFR	TIMP1	4436186	4433052	9606.ENSP00000275493	9606.ENSP00000218388	0	0	0	0	0.061	0	0	0.499	0.509
EGFR	PLEK	4436186	4433624	9606.ENSP00000275493	9606.ENSP00000234313	0	0	0	0	0	0	0	0.508	0.508
KIT	ICAM1	4436763	4435501	9606.ENSP00000288135	9606.ENSP00000264832	0	0	0	0	0.061	0	0	0.496	0.506
EGFR	LCP2	4436186	4432628	9606.ENSP00000275493	9606.ENSP00000046794	0	0	0	0	0	0.393	0	0.215	0.503
ICAM1	C3	4435501	4433951	9606.ENSP00000264832	9606.ENSP00000245907	0	0	0	0	0.098	0	0	0.471	0.502
ITGB2	FN1	4446737	4441661	9606.ENSP00000380948	9606.ENSP00000346839	0	0	0	0	0.063	0	0	0.486	0.497
CYBB	CTSS	4445083	4443237	9606.ENSP00000367851	9606.ENSP00000357981	0	0	0	0	0.417	0	0	0.172	0.497
CTSS	FCGR2A	4443237	4435978	9606.ENSP00000357981	9606.ENSP00000271450	0	0	0	0	0.414	0	0	0.173	0.495
MMP9	CAV1	4443919	4440933	9606.ENSP00000361405	9606.ENSP00000339191	0	0	0	0	0	0	0	0.493	0.493
CCL5	SERPINE1	4451102	4433266	9606.ENSP00000474412	9606.ENSP00000223095	0	0	0	0	0	0	0	0.493	0.493
CXCR4	CSF1R	4447439	4436666	9606.ENSP00000386884	9606.ENSP00000286301	0	0	0	0	0.065	0.05	0	0.473	0.491
HCK	ALB	4450141	4437206	9606.ENSP00000444986	9606.ENSP00000295897	0	0	0	0	0	0	0	0.492	0.491
MMP9	CD86	4443919	4440320	9606.ENSP00000361405	9606.ENSP00000332049	0	0	0	0	0.181	0	0	0.4	0.487
EGF	LOX	4435570	4433517	9606.ENSP00000265171	9606.ENSP00000231004	0	0	0	0	0	0	0	0.487	0.487
ITGAX	HCK	4450468	4450141	9606.ENSP00000454623	9606.ENSP00000444986	0	0	0	0	0.366	0.084	0	0.187	0.486
ERBB2	SERPINE1	4435897	4433266	9606.ENSP00000269571	9606.ENSP00000223095	0	0	0	0	0.061	0	0	0.475	0.486
TLR7	C3	4445433	4433951	9606.ENSP00000370034	9606.ENSP00000245907	0	0	0	0	0.063	0	0	0.473	0.485
CCL5	FCGR2A	4451102	4435978	9606.ENSP00000474412	9606.ENSP00000271450	0	0	0	0	0.098	0	0	0.45	0.482
LOX	CCND1	4433517	4433391	9606.ENSP00000231004	9606.ENSP00000227507	0	0	0	0	0.14	0	0	0.422	0.481
ALB	PLEK	4437206	4433624	9606.ENSP00000295897	9606.ENSP00000234313	0	0	0	0	0	0	0	0.48	0.48
CCL5	CSF1R	4451102	4436666	9606.ENSP00000474412	9606.ENSP00000286301	0	0	0	0	0.11	0	0	0.44	0.48
CXCR4	ITGB2	4447439	4446737	9606.ENSP00000386884	9606.ENSP00000380948	0	0	0	0	0.162	0	0	0.405	0.48
CYBB	FCGR2A	4445083	4435978	9606.ENSP00000367851	9606.ENSP00000271450	0	0	0	0	0.333	0	0	0.251	0.479
VEGFA	ITGAX	4451310	4450468	9606.ENSP00000478570	9606.ENSP00000454623	0	0	0	0	0	0	0	0.478	0.478
CD86	KIT	4440320	4436763	9606.ENSP00000332049	9606.ENSP00000288135	0	0	0	0	0	0	0	0.478	0.478
PTPRC	C3AR1	4448605	4437821	9606.ENSP00000411355	9606.ENSP00000302079	0	0	0	0	0.325	0	0	0.257	0.477
CCND1	SERPINE1	4433391	4433266	9606.ENSP00000227507	9606.ENSP00000223095	0	0	0	0	0.135	0	0	0.42	0.476
TLR7	FN1	4445433	4441661	9606.ENSP00000370034	9606.ENSP00000346839	0	0	0	0	0	0	0	0.474	0.474
PTPRC	CCND1	4448605	4433391	9606.ENSP00000411355	9606.ENSP00000227507	0	0	0	0	0	0	0	0.472	0.472
CYBB	FN1	4445083	4441661	9606.ENSP00000367851	9606.ENSP00000346839	0	0	0	0	0.061	0	0	0.456	0.468
ITGAX	MMP9	4450468	4443919	9606.ENSP00000454623	9606.ENSP00000361405	0	0	0	0	0.163	0	0	0.39	0.468
HCK	CD86	4450141	4440320	9606.ENSP00000444986	9606.ENSP00000332049	0	0	0	0	0.37	0	0	0.187	0.466
TLR7	MMP9	4445433	4443919	9606.ENSP00000370034	9606.ENSP00000361405	0	0	0	0	0.082	0	0	0.441	0.465
ICAM1	CCND1	4435501	4433391	9606.ENSP00000264832	9606.ENSP00000227507	0	0	0	0	0.061	0	0	0.453	0.465
ITGAX	C3AR1	4450468	4437821	9606.ENSP00000454623	9606.ENSP00000302079	0	0	0	0	0.202	0	0	0.353	0.462
VEGFA	C3	4451310	4433951	9606.ENSP00000478570	9606.ENSP00000245907	0	0	0	0	0.074	0	0	0.441	0.46
C3AR1	FCGR2A	4437821	4435978	9606.ENSP00000302079	9606.ENSP00000271450	0	0	0	0	0.289	0	0	0.268	0.458
ALB	CSF1R	4437206	4436666	9606.ENSP00000295897	9606.ENSP00000286301	0	0	0	0	0	0	0	0.456	0.456
EGF	TLR2	4435570	4434743	9606.ENSP00000265171	9606.ENSP00000260010	0	0	0	0	0	0.055	0	0.445	0.453
CTSS	CD86	4443237	4440320	9606.ENSP00000357981	9606.ENSP00000332049	0	0	0	0	0.372	0	0	0.165	0.453
HCK	CTSS	4450141	4443237	9606.ENSP00000444986	9606.ENSP00000357981	0	0	0	0	0.431	0	0	0.076	0.452
ICAM1	LCP2	4435501	4432628	9606.ENSP00000264832	9606.ENSP00000046794	0	0	0	0	0.088	0	0	0.422	0.45
CSF1R	ICAM1	4436666	4435501	9606.ENSP00000286301	9606.ENSP00000264832	0	0	0	0	0.082	0	0	0.426	0.45
CAV1	KNG1	4440933	4435537	9606.ENSP00000339191	9606.ENSP00000265023	0	0	0	0	0	0	0	0.447	0.447
KNG1	ICAM1	4435537	4435501	9606.ENSP00000265023	9606.ENSP00000264832	0	0	0	0	0.052	0	0	0.44	0.446
CCL5	ITGB2	4451102	4446737	9606.ENSP00000474412	9606.ENSP00000380948	0	0	0	0	0.177	0	0	0.355	0.446
TLR2	PLEK	4434743	4433624	9606.ENSP00000260010	9606.ENSP00000234313	0	0	0	0	0.344	0	0	0.19	0.446
FCGR2A	CD53	4435978	4435973	9606.ENSP00000271450	9606.ENSP00000271324	0	0	0	0	0.282	0	0	0.259	0.445
ERBB2	LOX	4435897	4433517	9606.ENSP00000269571	9606.ENSP00000231004	0	0	0	0	0.062	0	0	0.429	0.441
CXCR4	TIMP1	4447439	4433052	9606.ENSP00000386884	9606.ENSP00000218388	0	0	0	0	0	0	0	0.44	0.44
TLR2	TIMP1	4434743	4433052	9606.ENSP00000260010	9606.ENSP00000218388	0	0	0	0	0.063	0.064	0	0.412	0.439
MMP9	TYROBP	4443919	4435115	9606.ENSP00000361405	9606.ENSP00000262629	0	0	0	0	0.333	0	0	0.193	0.438
ITGAX	FN1	4450468	4441661	9606.ENSP00000454623	9606.ENSP00000346839	0	0	0	0	0	0	0	0.433	0.433
TLR7	TLR2	4445433	4434743	9606.ENSP00000370034	9606.ENSP00000260010	0	0	0	0.602	0.123	0	0	0.891	0.433
KIT	CSF1R	4436763	4436666	9606.ENSP00000288135	9606.ENSP00000286301	0	0	0	0.885	0	0.379	0	0.737	0.43
FN1	PLEK	4441661	4433624	9606.ENSP00000346839	9606.ENSP00000234313	0	0	0	0	0	0	0	0.429	0.429
FN1	CD86	4441661	4440320	9606.ENSP00000346839	9606.ENSP00000332049	0	0	0	0	0	0	0	0.429	0.429
CXCR4	FCGR2A	4447439	4435978	9606.ENSP00000386884	9606.ENSP00000271450	0	0	0	0	0.088	0	0	0.4	0.429
KIT	TLR2	4436763	4434743	9606.ENSP00000288135	9606.ENSP00000260010	0	0	0	0	0	0.089	0	0.398	0.428
CXCR4	LOX	4447439	4433517	9606.ENSP00000386884	9606.ENSP00000231004	0	0	0	0	0	0	0	0.428	0.428
FCGR2A	PLEK	4435978	4433624	9606.ENSP00000271450	9606.ENSP00000234313	0	0	0	0	0.319	0	0	0.185	0.421
ERBB2	TIMP1	4435897	4433052	9606.ENSP00000269571	9606.ENSP00000218388	0	0	0	0	0.062	0	0	0.409	0.421
ICAM1	LOX	4435501	4433517	9606.ENSP00000264832	9606.ENSP00000231004	0	0	0	0	0.061	0	0	0.409	0.421
ERBB2	ICAM1	4435897	4435501	9606.ENSP00000269571	9606.ENSP00000264832	0	0	0	0	0	0	0	0.419	0.418
CCL5	EGFR	4451102	4436186	9606.ENSP00000474412	9606.ENSP00000275493	0	0	0	0	0	0	0	0.419	0.418
MMP9	KNG1	4443919	4435537	9606.ENSP00000361405	9606.ENSP00000265023	0	0	0	0	0.061	0	0	0.401	0.413
TLR7	EGFR	4445433	4436186	9606.ENSP00000370034	9606.ENSP00000275493	0	0	0	0	0	0.079	0	0.387	0.411
CXCR4	LCP2	4447439	4432628	9606.ENSP00000386884	9606.ENSP00000046794	0	0	0	0	0.18	0	0	0.31	0.41
TLR7	EGF	4445433	4435570	9606.ENSP00000370034	9606.ENSP00000265171	0	0	0	0	0	0.055	0	0.397	0.405
FN1	CSF1R	4441661	4436666	9606.ENSP00000346839	9606.ENSP00000286301	0	0	0	0	0.062	0	0	0.39	0.403
HCK	TLR7	4450141	4445433	9606.ENSP00000444986	9606.ENSP00000370034	0	0	0	0	0.172	0.123	0	0.244	0.403
FCGR2A	LCP2	4435978	4432628	9606.ENSP00000271450	9606.ENSP00000046794	0	0	0	0	0.296	0	0	0.187	0.403
CD86	LAPTM5	4440320	4437079	9606.ENSP00000332049	9606.ENSP00000294507	0	0	0	0	0.403	0	0	0.041	0.403
EGF	C3	4435570	4433951	9606.ENSP00000265171	9606.ENSP00000245907	0	0	0	0	0.049	0.185	0	0.291	0.402
PTPRC	LOX	4448605	4433517	9606.ENSP00000411355	9606.ENSP00000231004	0	0	0	0	0	0	0	0.401	0.401
CTSS	KNG1	4443237	4435537	9606.ENSP00000357981	9606.ENSP00000265023	0	0	0	0	0	0.379	0	0.075	0.401
EGFR	KNG1	4436186	4435537	9606.ENSP00000275493	9606.ENSP00000265023	0	0	0	0	0	0	0	0.4	0.4
ERBB2	PLEK	4435897	4433624	9606.ENSP00000269571	9606.ENSP00000234313	0	0	0	0	0	0	0	0.4	0.4
LAPTM5	FCGR2A	4437079	4435978	9606.ENSP00000294507	9606.ENSP00000271450	0	0	0	0	0.302	0	0	0.176	0.4
