# Supplementary material for: Prediction and analysis of novel key genes ITGAX, LAPTM5, SERPINE1 in clear cell renal cell carcinoma through bioinformatics analysis
Source: PeerJ. 2021 Apr 20;9:e11272. doi: 10.7717/peerj.11272 (PMC8063882; doi:10.7717/peerj.11272)
Supplement: Supplemental Information 14 [file peerj-09-11272-s014.xlsx]

## Sheet: ITGAX-TCGA_Exp_convertlog
Tag	ENSG00000140678
TCGA-A3-3308-01	10.6856
TCGA-CJ-5672-01	11.0112
TCGA-CJ-5680-01	10.4543
TCGA-CZ-5465-01	10.716
TCGA-B0-5096-01	10.128
TCGA-B8-4153-01	10.0417
TCGA-BP-4964-01	10.9986
TCGA-A3-3324-01	11.4372
TCGA-CJ-4644-01	9.77314
TCGA-B0-5088-01	12.9161
TCGA-BP-4169-01	12.1564
TCGA-BP-4177-01	8.17493
TCGA-AK-3428-01	9.04439
TCGA-CJ-5689-01	9.80896
TCGA-CJ-4634-01	10.5127
TCGA-BP-4774-01	10.8424
TCGA-CZ-4856-01	9.80574
TCGA-BP-4959-01	11.9758
TCGA-B0-5100-01	8.36194
TCGA-CJ-4872-01	10.1331
TCGA-CZ-4854-01	11.0437
TCGA-BP-4768-01	11.3264
TCGA-CZ-5982-01	9.49386
TCGA-BP-4174-01	10.9166
TCGA-BP-4325-01	11.3343
TCGA-BP-4801-01	11.9679
TCGA-MM-A563-01	11.6948
TCGA-BP-4331-01	12.0495
TCGA-B0-5697-01	11.4325
TCGA-B0-4839-01	9.5216
TCGA-CJ-4889-01	11.0437
TCGA-B4-5836-01	9.58684
TCGA-B8-4620-01	11.525
TCGA-MM-A84U-01	10.6636
TCGA-CJ-5686-01	10.8918
TCGA-CW-5585-01	9.26444
TCGA-B2-4101-01	11.2456
TCGA-BP-4962-01	11.4247
TCGA-CZ-5460-01	10.7415
TCGA-CZ-5459-01	9.55651
TCGA-BP-5168-01	9.86109
TCGA-BP-4781-01	10.69
TCGA-B8-5553-01	10.7582
TCGA-B0-4945-01	9.98299
TCGA-CJ-4905-01	9.57554
TCGA-BP-5178-01	11.5038
TCGA-BP-4799-01	8.93369
TCGA-B0-4691-01	10.6644
TCGA-CW-5588-01	10.0498
TCGA-B8-5164-01	12.3337
TCGA-BP-4798-01	11.1306
TCGA-BP-4970-01	11.1098
TCGA-CJ-4876-01	9.72281
TCGA-CJ-4871-01	9.72962
TCGA-B0-5690-01	10.3869
TCGA-CJ-4900-01	12.6558
TCGA-BP-4967-01	10.8642
TCGA-MW-A4EC-01	10.4009
TCGA-B0-5115-01	11.749
TCGA-BP-4961-01	9.92035
TCGA-CZ-5451-01	9.84706
TCGA-A3-3378-01	11.8891
TCGA-B0-5080-01	8.12928
TCGA-CZ-5461-01	9.55842
TCGA-CW-6087-01	10.0526
TCGA-B0-4690-01	12.1261
TCGA-BP-4986-01	11.2544
TCGA-CJ-4870-01	9.62022
TCGA-CJ-6031-01	11.1273
TCGA-B0-5097-01	11.716
TCGA-B4-5844-01	9.07948
TCGA-BP-4337-01	11.6059
TCGA-BP-4782-01	10.792
TCGA-A3-3313-01	11.0133
TCGA-CJ-5677-01	10.8556
TCGA-A3-3385-01	9.98868
TCGA-B2-5633-01	11.2779
TCGA-BP-4989-01	12.9383
TCGA-AK-3447-01	5.08746
TCGA-CZ-5452-01	11.6036
TCGA-BP-5175-01	9.5216
TCGA-B0-4833-01	10.5196
TCGA-B4-5377-01	10.7074
TCGA-CJ-5676-01	9.72962
TCGA-CZ-4866-01	12.1302
TCGA-BP-5200-01	10.8517
TCGA-AK-3427-01	6.22882
TCGA-B0-5109-01	11.7989
TCGA-B0-5701-01	10.1447
TCGA-BP-4803-01	10.1046
TCGA-BP-4993-01	9.75822
TCGA-CJ-6028-01	10.7895
TCGA-CJ-4643-01	11.1731
TCGA-B8-A54D-01	10.8564
TCGA-B2-5633-01_Rep94	10.6211
TCGA-BP-4166-01	9.5157
TCGA-B0-5121-01	10.5708
TCGA-CJ-4639-01	9.633
TCGA-B0-5711-01	10.2288
TCGA-DV-5569-01	11.0238
TCGA-BP-4759-01	9.65464
TCGA-B2-3923-01	9.47168
TCGA-BP-5196-01	10.0014
TCGA-B0-5081-01	12.4244
TCGA-B0-5693-01	9.19476
TCGA-AK-3451-01	8.91289
TCGA-AK-3440-01	10.0251
TCGA-B0-4852-01	11.2831
TCGA-BP-5174-01	10.4747
TCGA-BP-5173-01	10.4179
TCGA-A3-3316-01	10.9129
TCGA-BP-4173-01	12.775
TCGA-B0-4842-01	10.9076
TCGA-B4-5832-01	6.84549
TCGA-A3-A6NI-01	11.2052
TCGA-BP-5169-01	11.1434
TCGA-DV-A4VX-01	11.4173
TCGA-G6-A8L6-01	10.4409
TCGA-B0-5399-01	10.7773
TCGA-BP-4338-01	11.5555
TCGA-BP-4353-01	10.8781
TCGA-A3-3370-01	12.2384
TCGA-BP-4968-01	11.3163
TCGA-CJ-4890-01	12.8694
TCGA-BP-5004-01	11.6161
TCGA-BP-4975-01	11.0848
TCGA-A3-3372-01	11.2527
TCGA-CJ-4869-01	11.1472
TCGA-CJ-4920-01	10.2726
TCGA-BP-4766-01	11.9304
TCGA-GK-A6C7-01	10.3955
TCGA-B0-4819-01	13.2519
TCGA-DV-A4W0-01	11.3658
TCGA-BP-5192-01	8.74483
TCGA-DV-5566-01	9.37504
TCGA-BP-4326-01	10.8106
TCGA-B2-5636-01	8.91886
TCGA-DV-5573-01	11.2848
TCGA-CW-5584-01	10.9256
TCGA-BP-4352-01	10.796
TCGA-B0-4706-01	10.4168
TCGA-A3-A8OW-01	10.2633
TCGA-CJ-4893-01	10.5765
TCGA-B0-5705-01	10.4929
TCGA-CJ-4642-01	7.05528
TCGA-DV-5575-01	10.1434
TCGA-BP-4977-01	12.1075
TCGA-CZ-5988-01	8.84235
TCGA-CJ-6027-01	10.8009
TCGA-A3-3311-01	10.7474
TCGA-CZ-5456-01	10.3619
TCGA-BP-5177-01	8.45943
TCGA-A3-3343-01	12.0735
TCGA-B0-4816-01	12.4589
TCGA-BP-5180-01	11.3542
TCGA-B4-5843-01	9.51964
TCGA-BP-4804-01	11.0451
TCGA-AK-3426-01	12.8146
TCGA-BP-4982-01	11.6119
TCGA-B8-5552-01	11.1935
TCGA-CJ-5671-01	12.0454
TCGA-B0-5702-01	7.74819
TCGA-B0-5700-01	9.41785
TCGA-B2-5639-01	9.9263
TCGA-CW-5591-01	8.02791
TCGA-B0-4821-01	11.0835
TCGA-AK-3465-01	8.9629
TCGA-CZ-4860-01	11.8118
TCGA-B4-5834-01	9.18239
TCGA-CZ-4864-01	11.8815
TCGA-CJ-5675-01	11.3202
TCGA-CW-6097-01	11.1072
TCGA-A3-3331-01	11.3083
TCGA-CZ-5987-01	10.3276
TCGA-A3-3359-01	11.0492
TCGA-CJ-5682-01	8.70044
TCGA-B0-5402-01	9.87191
TCGA-BP-4343-01	10.3432
TCGA-CZ-4865-01	10.5953
TCGA-EU-5904-01	9.49386
TCGA-A3-3358-01	11.8514
TCGA-A3-A8CQ-01	10.6996
TCGA-A3-3325-01	11.2192
TCGA-CJ-4886-01	10.4553
TCGA-B4-5838-01	8.91588
TCGA-BP-4332-01	10.7674
TCGA-A3-A8OV-01	10.2372
TCGA-CZ-5468-01	10.8796
TCGA-B0-4846-01	11.368
TCGA-B0-5400-01	11.1592
TCGA-BP-4762-01	9.91439
TCGA-BP-4758-01	10.9809
TCGA-B0-5085-01	11.1033
TCGA-CW-6088-01	10.3718
TCGA-CJ-4912-01	10.7895
TCGA-B0-4836-01	10.0251
TCGA-A3-3374-01	13.7906
TCGA-AK-3450-01	9.59805
TCGA-B0-4701-01	11.8591
TCGA-BP-4985-01	11.0875
TCGA-BP-4790-01	11.5421
TCGA-A3-3376-01	11.6096
TCGA-B0-4813-01	8.85487
TCGA-B8-4143-01	11.2288
TCGA-A3-3363-01	11.937
TCGA-B0-4838-01	11.2354
TCGA-B0-5699-01	10.9204
TCGA-6D-AA2E-01	11.7859
TCGA-G6-A5PC-01	9.50581
TCGA-AK-3429-01	9.62205
TCGA-B0-4817-01	12.5113
TCGA-CZ-5470-01	11.3487
TCGA-A3-A8OU-01	10.941
TCGA-B0-5706-01	8.48382
TCGA-CJ-5679-01	8.03892
TCGA-CZ-4853-01	10.6092
TCGA-A3-3307-01	10.611
TCGA-A3-A6NL-01	11.2113
TCGA-A3-3387-01	11.4969
TCGA-CJ-4888-01	12.2659
TCGA-B0-4834-01	7.09803
TCGA-B0-4811-01	10.6874
TCGA-BP-4965-01	10.4273
TCGA-BP-4340-01	11.1818
TCGA-B0-5108-01	12.192
TCGA-CZ-5455-01	11.4656
TCGA-B0-5102-01	10.6733
TCGA-B2-4098-01	12.6255
TCGA-B0-4697-01	10.9929
TCGA-AK-3433-01	8.7039
TCGA-CJ-4874-01	10.032
TCGA-DV-5576-01	7.60733
TCGA-B8-5159-01	10.2192
TCGA-B0-4700-01	11.0761
TCGA-T7-A92I-01	11.233
TCGA-B0-5709-01	11.5319
TCGA-B8-5163-01	10.1923
TCGA-BP-4170-01	10.9211
TCGA-DV-5567-01	8.73132
TCGA-CJ-4637-01	11.8305
TCGA-B0-4688-01	11.1447
TCGA-B2-5635-01	10.9046
TCGA-BP-4960-01	12.2603
TCGA-BP-5001-01	11.1536
TCGA-BP-4164-01	9.76984
TCGA-BP-4763-01	8.07682
TCGA-AK-3460-01	10.3663
TCGA-BP-4335-01	11.0614
TCGA-BP-5010-01	9.84706
TCGA-CJ-4881-01	11.7061
TCGA-BP-4344-01	10.3242
TCGA-BP-4995-01	10.722
TCGA-BP-4999-01	10.8757
TCGA-BP-5000-01	10.7797
TCGA-A3-3382-01	10.4979
TCGA-CW-5581-01	10.4584
TCGA-AK-3456-01	11.1605
TCGA-BP-4776-01	9.32193
TCGA-B0-5703-01	8.27612
TCGA-BP-4334-01	9.79766
TCGA-A3-3367-01	11.1605
TCGA-BP-5176-01	9.5157
TCGA-BP-5201-01	11.2992
TCGA-CW-6090-01	11.1586
TCGA-CZ-4858-01	10.4147
TCGA-CZ-5464-01	10.9851
TCGA-A3-3380-01	11.3848
TCGA-BP-4351-01	11.5527
TCGA-DV-5565-01	10.4635
TCGA-B8-A54F-01	9.00562
TCGA-BP-4167-01	11.3426
TCGA-EU-5906-01	11.0251
TCGA-B2-3923-01_Rep272	8.19967
TCGA-CW-5590-01	10.0741
TCGA-B8-4146-01	8.72451
TCGA-A3-3349-01	10.062
TCGA-A3-3352-01	11.9281
TCGA-B0-4849-01	11.6216
TCGA-BP-4991-01	11.4722
TCGA-B0-5713-01	10.2574
TCGA-BP-5186-01	9.98157
TCGA-CJ-4885-01	9.61287
TCGA-G6-A8L8-01	10.1033
TCGA-B2-3924-01	10.0251
TCGA-CZ-5454-01	12.265
TCGA-CJ-4873-01	12.7074
TCGA-B4-5835-01	12.098
TCGA-BP-4973-01	12.2866
TCGA-B0-5812-01	10.1997
TCGA-CJ-4641-01	11.8607
TCGA-B0-5710-01	9.28771
TCGA-BP-4992-01	12.584
TCGA-A3-A8OX-01	10.9844
TCGA-B0-5695-01	9.11374
TCGA-B0-5691-01	9.61102
TCGA-AK-3425-01	10.8781
TCGA-BP-4347-01	10.891
TCGA-BP-4354-01	12.0755
TCGA-BP-4345-01	11.526
TCGA-CJ-6032-01	10.196
TCGA-BP-4355-01	11.0203
TCGA-B8-5550-01	10.4798
TCGA-BP-4163-01	11.1466
TCGA-CZ-4863-01	11.2064
TCGA-BP-4971-01	14.1527
TCGA-BP-4327-01	10.8353
TCGA-A3-3323-01	11.3315
TCGA-CJ-4636-01	11.6917
TCGA-BP-4974-01	11.7082
TCGA-B0-5098-01	9.66
TCGA-B0-5707-01	9.91439
TCGA-A3-3335-01	11.8061
TCGA-CJ-4640-01	10.6952
TCGA-B2-5633-01_Rep313	10.2264
TCGA-G6-A8L7-01	8.06609
TCGA-B8-4622-01	11.3078
TCGA-B0-5094-01	10.2538
TCGA-CZ-5469-01	10.813
TCGA-BP-4342-01	11.2027
TCGA-B8-A54I-01	11.0546
TCGA-CJ-4884-01	12.0947
TCGA-BP-5181-01	9.81538
TCGA-A3-3362-01	9.99435
TCGA-B0-5712-01	8.62571
TCGA-A3-3373-01	10.9887
TCGA-A3-3365-01	10.2784
TCGA-BP-4976-01	9.94251
TCGA-DV-5568-01	10.5108
TCGA-CZ-4859-01	9.15482
TCGA-BP-5183-01	11.445
TCGA-BP-4761-01	9.80896
TCGA-B2-3924-01_Rep331	10.9687
TCGA-B8-5162-01	11.9876
TCGA-BP-4771-01	12.7713
TCGA-CJ-4908-01	11.3276
TCGA-BP-5184-01	9.44087
TCGA-B0-4699-01	12.0898
TCGA-A3-A6NN-01	10.9121
TCGA-CJ-4868-01	11.1561
TCGA-B0-5075-01	13.0664
TCGA-A3-3306-01	9.89633
TCGA-B8-5546-01	11.941
TCGA-BP-5202-01	10.4727
TCGA-BP-4981-01	11.3832
TCGA-B0-4693-01	10.9263
TCGA-B8-A7U6-01	10.8234
TCGA-BP-5194-01	10.9723
TCGA-A3-3320-01	10.8057
TCGA-BP-4341-01	11.1331
TCGA-BP-4969-01	11.0307
TCGA-B0-5116-01	8.72792
TCGA-B0-5692-01	10.6339
TCGA-B0-4815-01	11.6411
TCGA-B0-4814-01	10.421
TCGA-B0-4698-01	11.4341
TCGA-B8-A54G-01	12.8657
TCGA-BP-4760-01	10.6366
TCGA-CJ-4901-01	12.1805
TCGA-B2-3923-01_Rep358	9.43671
TCGA-CJ-4878-01	10.332
TCGA-B0-4843-01	9.73809
TCGA-B0-4841-01	8.28077
TCGA-CJ-4891-01	12.8182
TCGA-CJ-4907-01	10.5294
TCGA-A3-3351-01	12.3832
TCGA-B0-5104-01	11.3123
TCGA-B0-5099-01	9.23601
TCGA-BP-4165-01	10.4858
TCGA-A3-3328-01	7.98299
TCGA-B8-A54K-01	8.29002
TCGA-BP-4987-01	10.9922
TCGA-BP-5008-01	12.0705
TCGA-A3-3357-01	11.8265
TCGA-B2-3924-01_Rep373	9.82177
TCGA-BP-5198-01	11.8463
TCGA-B0-4810-01	10.7616
TCGA-EU-5905-01	8.15482
TCGA-BP-4994-01	10.421
TCGA-BP-5170-01	9.88111
TCGA-CW-5583-01	8.94251
TCGA-AS-3777-01	9.03892
TCGA-B0-4818-01	10.8337
TCGA-BP-4998-01	12.2923
TCGA-CJ-4899-01	11.8784
TCGA-B2-4099-01	11.0941
TCGA-MM-A564-01	9.48382
TCGA-B0-5106-01	12.0835
TCGA-B8-5165-01	10.3476
TCGA-B0-5694-01	9.63662
TCGA-CJ-4897-01	9.99435
TCGA-B8-A8YJ-01	11.5255
TCGA-BP-4770-01	10.1812
TCGA-BP-4784-01	8.01681
TCGA-B0-5113-01	10.8447
TCGA-CJ-4875-01	11.2348
TCGA-B0-5696-01	8.91588
TCGA-A3-3317-01	11.983
TCGA-B0-5077-01	11.8467
TCGA-CW-6093-01	9.31061
TCGA-BP-4963-01	12.0014
TCGA-BP-4789-01	8.8857
TCGA-B0-4694-01	12.0021
TCGA-AK-3431-01	8.29462
TCGA-BP-5199-01	11.5206
TCGA-B0-5698-01	11.1376
TCGA-CW-5587-01	11.357
TCGA-CJ-4638-01	10.585
TCGA-B0-5083-01	11.8333
TCGA-CJ-4903-01	11.0668
TCGA-BP-5185-01	8.60363
TCGA-CZ-5466-01	11.4398
TCGA-BP-5187-01	7.97728
TCGA-DV-5574-01	11.4247
TCGA-AK-3454-01	9.89785
TCGA-BP-4797-01	11.5793
TCGA-CJ-5681-01	12.967
TCGA-BP-4983-01	13.0721
TCGA-BP-4349-01	10.8626
TCGA-B0-4710-01	10.9672
TCGA-A3-3319-01	11.4934
TCGA-B4-5378-01	8.69
TCGA-BP-4329-01	10.6546
TCGA-B0-4713-01	9.67243
TCGA-AK-3434-01	9.70044
TCGA-AK-3455-01	9.77643
TCGA-CZ-4861-01	11.8853
TCGA-BP-5006-01	11.42
TCGA-CZ-5989-01	7.80735
TCGA-B8-4151-01	9.33092
TCGA-A3-3347-01	12.0317
TCGA-CJ-4918-01	10.1624
TCGA-BP-4162-01	11.3772
TCGA-CJ-4894-01	11.6649
TCGA-CJ-4892-01	10.8455
TCGA-3Z-A93Z-01	9.02514
TCGA-BP-5189-01	11.3021
TCGA-B8-4621-01	11.9103
TCGA-B8-5551-01	11.9392
TCGA-BP-4330-01	12.3063
TCGA-B8-5545-01	10.668
TCGA-CJ-4887-01	11.9259
TCGA-BP-4176-01	12.0924
TCGA-B0-4823-01	10.7237
TCGA-BP-4795-01	9.91139
TCGA-CJ-4895-01	10.1254
TCGA-AK-3445-01	10.3696
TCGA-B0-5120-01	10.1293
TCGA-CJ-4882-01	11.3729
TCGA-AK-3436-01	9.31741
TCGA-CW-5580-01	11.1228
TCGA-B8-4148-01	11.9407
TCGA-B8-4154-01	10.332
TCGA-BP-4765-01	10.7415
TCGA-BP-4777-01	11.7241
TCGA-AS-3778-01	10.5953
TCGA-B0-5095-01	10.4471
TCGA-CZ-5985-01	11.9039
TCGA-BP-5195-01	10.3576
TCGA-B0-5119-01	9.20701
TCGA-CZ-5458-01	10.1836
TCGA-B0-4822-01	11.1059
TCGA-CW-5589-01	10.8146
TCGA-BP-5182-01	12.599
TCGA-A3-3326-01	11.5793
TCGA-AK-3443-01	7.05528
TCGA-BP-4972-01	12.4964
TCGA-BP-4775-01	11.265
TCGA-B0-4847-01	12.4445
TCGA-AK-3453-01	11.9189
TCGA-BP-5190-01	10.2969
TCGA-B8-A54E-01	9.44294
TCGA-B8-A54H-01	10.5527
TCGA-B0-4707-01	8.47573
TCGA-B2-A4SR-01	10.8688
TCGA-B8-4619-01	7.7879
TCGA-B0-4828-01	10.1293
TCGA-B0-4827-01	10.4231
TCGA-BP-5191-01	11.4949
TCGA-BP-4158-01	10.8098
TCGA-BP-5007-01	10.8781
TCGA-CZ-5463-01	11.0908
TCGA-B0-5092-01	11.8929
TCGA-B2-5635-01_Rep482	10.137
TCGA-A3-3322-01	10.7557
TCGA-CJ-4916-01	12.0095
TCGA-AK-3458-01	9.35094
TCGA-A3-3329-01	10.2935
TCGA-A3-3383-01	9.85953
TCGA-CJ-4635-01	11.4445
TCGA-A3-A6NJ-01	11.2952
TCGA-B0-5084-01	12.0035
TCGA-BP-4769-01	8.10329
TCGA-BP-4160-01	9.38586
TCGA-B2-5641-01	11.3955
TCGA-BP-4161-01	12.1892
TCGA-CZ-5457-01	10.0875
TCGA-B0-4718-01	9.94544
TCGA-DV-A4VZ-01	9.07948
TCGA-B8-A54J-01	10.7715
TCGA-BP-5009-01	11.0437
TCGA-CJ-5678-01	10.821
TCGA-CZ-4857-01	10.8918
TCGA-CJ-6033-01	9.69523
TCGA-CZ-5984-01	10.2609
TCGA-B0-5110-01	10.3923
TCGA-B0-4696-01	9.73809
TCGA-B0-4844-01	9.80413
TCGA-B0-4714-01	12.3815
TCGA-B0-5117-01	8.22882
TCGA-CZ-5467-01	8.99718
TCGA-CZ-5453-01	9.24079
TCGA-B0-4845-01	10.7415
TCGA-BP-4807-01	10.6257
TCGA-CZ-4862-01	11.2228
TCGA-BP-4346-01	12.7413
TCGA-B0-4712-01	10.7731
TCGA-CJ-4904-01	10.8114
TCGA-CZ-5986-01	10.1137
TCGA-A3-3346-01	11.7801
TCGA-CJ-5684-01	9.87498
TCGA-CJ-4902-01	12.2243
TCGA-CJ-6030-01	11.5868
TCGA-B0-4703-01	10.3174
TCGA-B0-4837-01	9.85019
TCGA-AK-3461-01	10.9773
TCGA-BP-4159-01	9.35975
TCGA-B2-5635-01_Rep526	10.4848
TCGA-CJ-5683-01	9.59246
TCGA-BP-4756-01	12.7358
TCGA-EU-5907-01	8.88264
TCGA-B8-5549-01	10.2046
TCGA-BP-4787-01	10.952
TCGA-B0-5107-01	12.0731
TCGA-CZ-5462-01	11.115
TCGA-B8-5158-01	11.4351
TCGA-B0-4848-01	10.1331
TCGA-B2-4102-01	11.7842
TCGA-B0-4824-01	11.2877
TCGA-DV-A4W0-05	8.96867
TCGA-CZ-5989-11	8.7211
TCGA-CZ-5987-11	8.61839
TCGA-CZ-5985-11	5.90689
TCGA-CZ-5455-11	6.04439
TCGA-CZ-5451-11	7.32193
TCGA-CZ-5984-11	7.03342
TCGA-B8-5552-11	9.2854
TCGA-CZ-5982-11	4.70044
TCGA-B0-5697-11	5.08746
TCGA-CJ-5678-11	7.36632
TCGA-CW-5584-11	9.57365
TCGA-CW-5587-11	7.26679
TCGA-CZ-4863-11	6.22882
TCGA-CZ-5988-11	6.35755
TCGA-CW-5589-11	7.49985
TCGA-CW-5585-11	6.53916
TCGA-CJ-5689-11	8.14975
TCGA-B8-4622-11	8.09803
TCGA-B8-4620-11	8.8009
TCGA-B2-5636-11	8.93664
TCGA-B0-5699-11	5.83289
TCGA-CZ-5457-11	7.40939
TCGA-CJ-5681-11	6.56986
TCGA-CZ-5462-11	7.73471
TCGA-B0-5694-11	8.66178
TCGA-CZ-5469-11	5.04439
TCGA-CJ-6033-11	7.70044
TCGA-CZ-5461-11	6.88264
TCGA-CW-6088-11	5.67243
TCGA-B8-5549-11	6.35755
TCGA-CW-6090-11	6.70044
TCGA-CW-6087-11	6.20945
TCGA-CW-5580-11	7.8392
TCGA-CZ-5466-11	8.5157
TCGA-B8-4619-11	7.33092
TCGA-B0-5705-11	7.2854
TCGA-CJ-5676-11	8.52356
TCGA-CZ-5452-11	5.52356
TCGA-CZ-5986-11	6.56986
TCGA-B0-5711-11	7.27612
TCGA-B0-4700-11	7.43463
TCGA-CZ-5456-11	5.39232
TCGA-CJ-5677-11	7.74147
TCGA-B0-5703-11	6.47573
TCGA-CW-5581-11	6.44294
TCGA-B0-5701-11	8.7211
TCGA-B0-5709-11	8.2854
TCGA-CZ-5453-11	7
TCGA-CJ-5672-11	6.14975
TCGA-CZ-4865-11	6.47573
TCGA-CZ-5454-11	7.25739
TCGA-CZ-4864-11	7.41785
TCGA-CZ-5463-11	7.17991
TCGA-B0-5691-11	9.84235
TCGA-CW-5591-11	10.5784
TCGA-CZ-5470-11	6.35755
TCGA-B0-5696-11	7.48382
TCGA-A3-3387-11	6.59991
TCGA-B0-5712-11	8.78463
TCGA-A3-3358-11	7.48382
TCGA-B0-5402-11	8.82972
TCGA-B0-5690-11	6.39232
TCGA-CJ-5679-11	7.78136
TCGA-CZ-5465-11	5.70044
TCGA-B2-5641-11	5.58496
TCGA-CJ-5680-11	10.8384
TCGA-B0-5706-11	5.83289
TCGA-CZ-5458-11	5.83289
TCGA-CZ-5468-11	6.44294
TCGA-CZ-5467-11	6.47573
TCGA-B0-4712-11	6.64386
TCGA-CJ-6030-11	8.633

## Sheet: Sheet1
Tag	ENSG00000140678			Tag	ENSG00000140678
TCGA-A3-3358-01	11.8514			TCGA-A3-3358-01	11.8514	TCGA-A3-3358-11	7.48382
TCGA-A3-3358-11	7.48382			TCGA-A3-3387-01	11.4969	TCGA-A3-3387-11	6.59991
TCGA-A3-3387-01	11.4969
TCGA-A3-3387-11	6.59991
TCGA-B0-4700-01	11.0761			TCGA-B0-4700-01	11.0761	TCGA-B0-4700-11	7.43463
TCGA-B0-4700-11	7.43463
				TCGA-B0-4712-01	10.7731	TCGA-B0-4712-11	6.64386
				TCGA-B0-5402-01	9.87191	TCGA-B0-5402-11	8.82972
				TCGA-B0-5690-01	10.3869	TCGA-B0-5690-11	6.39232
				TCGA-B0-5691-01	9.61102	TCGA-B0-5691-11	9.84235
				TCGA-B0-5694-01	9.63662	TCGA-B0-5694-11	8.66178
				TCGA-B0-5696-01	8.91588	TCGA-B0-5696-11	7.48382
				TCGA-B0-5697-01	11.4325	TCGA-B0-5697-11	5.08746
				TCGA-B0-5699-01	10.9204	TCGA-B0-5699-11	5.83289
				TCGA-B0-5701-01	10.1447	TCGA-B0-5701-11	8.7211
				TCGA-B0-5703-01	8.27612	TCGA-B0-5703-11	6.47573
				TCGA-B0-5705-01	10.4929	TCGA-B0-5705-11	7.2854
				TCGA-B0-5706-01	8.48382	TCGA-B0-5706-11	5.83289
TCGA-A3-3359-01	11.0492
TCGA-A3-3362-01	9.99435			TCGA-B0-5709-01	11.5319	TCGA-B0-5709-11	8.2854
TCGA-A3-3363-01	11.937
TCGA-A3-3365-01	10.2784			TCGA-B0-5711-01	10.2288	TCGA-B0-5711-11	7.27612
TCGA-A3-3367-01	11.1605
TCGA-A3-3370-01	12.2384			TCGA-B0-5712-01	8.62571	TCGA-B0-5712-11	8.78463
TCGA-A3-3372-01	11.2527
TCGA-A3-3373-01	10.9887			TCGA-B2-5636-01	8.91886	TCGA-B2-5636-11	8.93664
TCGA-A3-3374-01	13.7906
TCGA-A3-3376-01	11.6096			TCGA-B2-5641-01	11.3955	TCGA-B2-5641-11	5.58496
TCGA-A3-3378-01	11.8891
TCGA-A3-3380-01	11.3848			TCGA-B8-4619-01	7.7879	TCGA-B8-4619-11	7.33092
TCGA-A3-3382-01	10.4979
TCGA-A3-3383-01	9.85953			TCGA-B8-4622-01	11.3078	TCGA-B8-4622-11	8.09803
TCGA-A3-3385-01	9.98868
				TCGA-B8-4620-01	11.525	TCGA-B8-4620-11	8.8009
TCGA-A3-A6NI-01	11.2052			TCGA-B8-5549-01	10.2046	TCGA-B8-5549-11	6.35755
TCGA-A3-A6NJ-01	11.2952
TCGA-A3-A6NL-01	11.2113			TCGA-B8-5552-01	11.1935	TCGA-B8-5552-11	9.2854
TCGA-A3-A6NN-01	10.9121
TCGA-A3-A8CQ-01	10.6996			TCGA-CJ-5676-01	9.72962	TCGA-CJ-5676-11	8.52356
TCGA-A3-A8OU-01	10.941
TCGA-A3-A8OV-01	10.2372			TCGA-CJ-5677-01	10.8556	TCGA-CJ-5677-11	7.74147
TCGA-A3-A8OW-01	10.2633
TCGA-A3-A8OX-01	10.9844			TCGA-CJ-5678-01	10.821	TCGA-CJ-5678-11	7.36632
TCGA-AK-3425-01	10.8781
TCGA-AK-3426-01	12.8146			TCGA-CJ-5679-01	8.03892	TCGA-CJ-5679-11	7.78136
TCGA-AK-3427-01	6.22882
TCGA-AK-3428-01	9.04439			TCGA-CJ-5680-01	10.4543	TCGA-CJ-5680-11	10.8384
TCGA-AK-3429-01	9.62205
TCGA-AK-3431-01	8.29462			TCGA-CJ-5681-01	12.967	TCGA-CJ-5681-11	6.56986
TCGA-AK-3433-01	8.7039
TCGA-AK-3434-01	9.70044			TCGA-CJ-5682-01	8.70044	TCGA-CJ-5683-01	9.59246
TCGA-AK-3436-01	9.31741
TCGA-AK-3440-01	10.0251			TCGA-CJ-5689-01	9.80896	TCGA-CJ-5689-11	8.14975
TCGA-AK-3443-01	7.05528
TCGA-AK-3445-01	10.3696			TCGA-CJ-6030-01	11.5868	TCGA-CJ-6030-11	8.633
TCGA-AK-3447-01	5.08746
TCGA-AK-3450-01	9.59805			TCGA-CJ-6033-01	9.69523	TCGA-CJ-6033-11	7.70044
TCGA-AK-3451-01	8.91289
TCGA-AK-3453-01	11.9189			TCGA-CW-5580-01	11.1228	TCGA-CW-5580-11	7.8392
TCGA-AK-3454-01	9.89785
TCGA-AK-3455-01	9.77643			TCGA-CW-5581-01	10.4584	TCGA-CW-5581-11	6.44294
TCGA-AK-3456-01	11.1605
TCGA-AK-3458-01	9.35094			TCGA-CW-5584-01	10.9256	TCGA-CW-5584-11	9.57365
TCGA-AK-3460-01	10.3663
TCGA-AK-3461-01	10.9773			TCGA-CW-5585-01	9.26444	TCGA-CW-5585-11	6.53916
TCGA-AK-3465-01	8.9629
TCGA-AS-3777-01	9.03892			TCGA-CW-5587-01	11.357	TCGA-CW-5587-11	7.26679
TCGA-AS-3778-01	10.5953
TCGA-B0-4688-01	11.1447			TCGA-CW-5589-01	10.8146	TCGA-CW-5589-11	7.49985
TCGA-B0-4690-01	12.1261
TCGA-B0-4691-01	10.6644			TCGA-CW-5591-01	8.02791	TCGA-CW-5591-11	10.5784
TCGA-B0-4693-01	10.9263
TCGA-B0-4694-01	12.0021			TCGA-CW-6087-01	10.0526	TCGA-CW-6087-11	6.20945
TCGA-B0-4696-01	9.73809
TCGA-B0-4697-01	10.9929			TCGA-CW-6088-01	10.3718	TCGA-CW-6088-11	5.67243
TCGA-B0-4698-01	11.4341
TCGA-B0-4699-01	12.0898			TCGA-CW-6090-01	11.1586	TCGA-CW-6090-11	6.70044
				TCGA-CZ-4863-01	11.2064	TCGA-CZ-4863-11	6.22882
TCGA-B0-4701-01	11.8591
TCGA-B0-4703-01	10.3174			TCGA-CZ-4864-01	11.8815	TCGA-CZ-4864-11	7.41785
TCGA-B0-4706-01	10.4168
TCGA-B0-4707-01	8.47573			TCGA-CZ-4865-01	10.5953	TCGA-CZ-4865-11	6.47573
TCGA-B0-4710-01	10.9672
				TCGA-CZ-5451-01	9.84706	TCGA-CZ-5451-11	7.32193
TCGA-B0-4713-01	9.67243			TCGA-CZ-5452-01	11.6036	TCGA-CZ-5452-11	5.52356
TCGA-B0-4714-01	12.3815
TCGA-B0-4718-01	9.94544			TCGA-CZ-5453-01	9.24079	TCGA-CZ-5453-11	7
TCGA-B0-4810-01	10.7616
TCGA-B0-4811-01	10.6874			TCGA-CZ-5454-01	12.265	TCGA-CZ-5454-11	7.25739
TCGA-B0-4813-01	8.85487
TCGA-B0-4814-01	10.421			TCGA-CZ-5455-01	11.4656	TCGA-CZ-5455-11	6.04439
TCGA-B0-4815-01	11.6411
TCGA-B0-4816-01	12.4589			TCGA-CZ-5456-01	10.3619	TCGA-CZ-5456-11	5.39232
TCGA-B0-4817-01	12.5113
TCGA-B0-4818-01	10.8337			TCGA-CZ-5457-01	10.0875	TCGA-CZ-5457-11	7.40939
TCGA-B0-4819-01	13.2519
TCGA-B0-4821-01	11.0835			TCGA-CZ-5458-01	10.1836	TCGA-CZ-5458-11	5.83289
TCGA-B0-4822-01	11.1059
TCGA-B0-4823-01	10.7237
TCGA-B0-4824-01	11.2877
TCGA-B0-4827-01	10.4231			TCGA-CZ-5461-01	9.55842	TCGA-CZ-5461-11	6.88264
TCGA-B0-4828-01	10.1293
TCGA-B0-4833-01	10.5196			TCGA-CZ-5462-01	11.115	TCGA-CZ-5462-11	7.73471
TCGA-B0-4834-01	7.09803
TCGA-B0-4836-01	10.0251			TCGA-CZ-5463-01	11.0908	TCGA-CZ-5463-11	7.17991
TCGA-B0-4837-01	9.85019
TCGA-B0-4838-01	11.2354
TCGA-B0-4839-01	9.5216			TCGA-CZ-5465-01	10.716	TCGA-CZ-5465-11	5.70044
TCGA-B0-4841-01	8.28077
TCGA-B0-4842-01	10.9076			TCGA-CZ-5466-01	11.4398	TCGA-CZ-5466-11	8.5157
TCGA-B0-4843-01	9.73809
TCGA-B0-4844-01	9.80413			TCGA-CZ-5467-01	8.99718	TCGA-CZ-5467-11	6.47573
TCGA-B0-4845-01	10.7415
TCGA-B0-4846-01	11.368			TCGA-CZ-5468-01	10.8796	TCGA-CZ-5468-11	6.44294
TCGA-B0-4847-01	12.4445
TCGA-B0-4848-01	10.1331			TCGA-CZ-5469-01	10.813	TCGA-CZ-5469-11	5.04439
TCGA-B0-4849-01	11.6216
TCGA-B0-4852-01	11.2831			TCGA-CZ-5470-01	11.3487	TCGA-CZ-5470-11	6.35755
TCGA-B0-4945-01	9.98299
TCGA-B0-5075-01	13.0664			TCGA-CZ-5982-01	9.49386	TCGA-CZ-5982-11	4.70044
TCGA-B0-5077-01	11.8467
TCGA-B0-5080-01	8.12928			TCGA-CZ-5984-01	10.2609	TCGA-CZ-5984-11	7.03342
TCGA-B0-5081-01	12.4244
TCGA-B0-5083-01	11.8333			TCGA-CZ-5985-01	11.9039	TCGA-CZ-5985-11	5.90689
TCGA-B0-5084-01	12.0035
TCGA-B0-5085-01	11.1033			TCGA-CZ-5986-01	10.1137	TCGA-CZ-5986-11	6.56986
TCGA-B0-5088-01	12.9161
TCGA-B0-5092-01	11.8929			TCGA-CZ-5987-01	10.3276	TCGA-CZ-5987-11	8.61839
TCGA-B0-5094-01	10.2538
TCGA-B0-5095-01	10.4471			TCGA-CZ-5988-01	8.84235	TCGA-CZ-5988-11	6.35755
TCGA-B0-5096-01	10.128
TCGA-B0-5097-01	11.716			TCGA-CZ-5989-01	7.80735	TCGA-CZ-5989-11	8.7211
TCGA-B0-5098-01	9.66
TCGA-B0-5099-01	9.23601
TCGA-B0-5100-01	8.36194
TCGA-B0-5102-01	10.6733
TCGA-B0-5104-01	11.3123
TCGA-B0-5106-01	12.0835
TCGA-B0-5107-01	12.0731
TCGA-B0-5108-01	12.192
TCGA-B0-5109-01	11.7989
TCGA-B0-5110-01	10.3923
TCGA-B0-5113-01	10.8447
TCGA-B0-5115-01	11.749
TCGA-B0-5116-01	8.72792
TCGA-B0-5117-01	8.22882
TCGA-B0-5119-01	9.20701
TCGA-B0-5120-01	10.1293
TCGA-B0-5121-01	10.5708
TCGA-B0-5399-01	10.7773
TCGA-B0-5400-01	11.1592
TCGA-B0-5692-01	10.6339
TCGA-B0-5693-01	9.19476
TCGA-B0-5695-01	9.11374
TCGA-B0-5698-01	11.1376
TCGA-B0-5700-01	9.41785
TCGA-B0-5702-01	7.74819
TCGA-B0-5707-01	9.91439
TCGA-B0-5710-01	9.28771
TCGA-B0-5713-01	10.2574
TCGA-B0-5812-01	10.1997
TCGA-B2-3923-01	9.47168
TCGA-B2-3923-01_Rep272	8.19967
TCGA-B2-3923-01_Rep358	9.43671
TCGA-B2-3924-01	10.0251
TCGA-B2-3924-01_Rep331	10.9687
TCGA-B2-3924-01_Rep373	9.82177
TCGA-B2-4098-01	12.6255
TCGA-B2-4099-01	11.0941
TCGA-B2-4101-01	11.2456
TCGA-B2-4102-01	11.7842
TCGA-B2-5633-01	11.2779
TCGA-B2-5633-01_Rep313	10.2264
TCGA-B2-5633-01_Rep94	10.6211
TCGA-B2-5635-01	10.9046
TCGA-B2-5635-01_Rep482	10.137
TCGA-B2-5635-01_Rep526	10.4848
TCGA-B2-5639-01	9.9263
TCGA-B2-A4SR-01	10.8688
TCGA-B4-5377-01	10.7074
TCGA-B4-5378-01	8.69
TCGA-B4-5832-01	6.84549
TCGA-B4-5834-01	9.18239
TCGA-B4-5835-01	12.098
TCGA-B4-5836-01	9.58684
TCGA-B4-5838-01	8.91588
TCGA-B4-5843-01	9.51964
TCGA-B4-5844-01	9.07948
TCGA-B8-4143-01	11.2288
TCGA-B8-4146-01	8.72451
TCGA-B8-4148-01	11.9407
TCGA-B8-4151-01	9.33092
TCGA-B8-4153-01	10.0417
TCGA-B8-4154-01	10.332
TCGA-B8-4621-01	11.9103
TCGA-B8-5158-01	11.4351
TCGA-B8-5159-01	10.2192
TCGA-B8-5162-01	11.9876
TCGA-B8-5163-01	10.1923
TCGA-B8-5164-01	12.3337
TCGA-B8-5165-01	10.3476
TCGA-B8-5545-01	10.668
TCGA-B8-5546-01	11.941
TCGA-B8-5550-01	10.4798
TCGA-B8-5551-01	11.9392
TCGA-B8-5553-01	10.7582
TCGA-B8-A54D-01	10.8564
TCGA-B8-A54E-01	9.44294
TCGA-B8-A54F-01	9.00562
TCGA-B8-A54G-01	12.8657
TCGA-B8-A54H-01	10.5527
TCGA-B8-A54I-01	11.0546
TCGA-B8-A54J-01	10.7715
TCGA-B8-A54K-01	8.29002
TCGA-B8-A7U6-01	10.8234
TCGA-B8-A8YJ-01	11.5255
TCGA-BP-4158-01	10.8098
TCGA-BP-4159-01	9.35975
TCGA-BP-4160-01	9.38586
TCGA-BP-4161-01	12.1892
TCGA-BP-4162-01	11.3772
TCGA-BP-4163-01	11.1466
TCGA-BP-4164-01	9.76984
TCGA-BP-4165-01	10.4858
TCGA-BP-4166-01	9.5157
TCGA-BP-4167-01	11.3426
TCGA-BP-4169-01	12.1564
TCGA-BP-4170-01	10.9211
TCGA-BP-4173-01	12.775
TCGA-BP-4174-01	10.9166
TCGA-BP-4176-01	12.0924
TCGA-BP-4177-01	8.17493
TCGA-BP-4325-01	11.3343
TCGA-BP-4326-01	10.8106
TCGA-BP-4327-01	10.8353
TCGA-BP-4329-01	10.6546
TCGA-BP-4330-01	12.3063
TCGA-BP-4331-01	12.0495
TCGA-BP-4332-01	10.7674
TCGA-BP-4334-01	9.79766
TCGA-BP-4335-01	11.0614
TCGA-BP-4337-01	11.6059
TCGA-BP-4338-01	11.5555
TCGA-BP-4340-01	11.1818
TCGA-BP-4341-01	11.1331
TCGA-BP-4342-01	11.2027
TCGA-BP-4343-01	10.3432
TCGA-BP-4344-01	10.3242
TCGA-BP-4345-01	11.526
TCGA-BP-4346-01	12.7413
TCGA-BP-4347-01	10.891
TCGA-BP-4349-01	10.8626
TCGA-BP-4351-01	11.5527
TCGA-BP-4352-01	10.796
TCGA-BP-4353-01	10.8781
TCGA-BP-4354-01	12.0755
TCGA-BP-4355-01	11.0203
TCGA-BP-4756-01	12.7358
TCGA-BP-4758-01	10.9809
TCGA-BP-4759-01	9.65464
TCGA-BP-4760-01	10.6366
TCGA-BP-4761-01	9.80896
TCGA-BP-4762-01	9.91439
TCGA-BP-4763-01	8.07682
TCGA-BP-4765-01	10.7415
TCGA-BP-4766-01	11.9304
TCGA-BP-4768-01	11.3264
TCGA-BP-4769-01	8.10329
TCGA-BP-4770-01	10.1812
TCGA-BP-4771-01	12.7713
TCGA-BP-4774-01	10.8424
TCGA-BP-4775-01	11.265
TCGA-BP-4776-01	9.32193
TCGA-BP-4777-01	11.7241
TCGA-BP-4781-01	10.69
TCGA-BP-4782-01	10.792
TCGA-BP-4784-01	8.01681
TCGA-BP-4787-01	10.952
TCGA-BP-4789-01	8.8857
TCGA-BP-4790-01	11.5421
TCGA-BP-4795-01	9.91139
TCGA-BP-4797-01	11.5793
TCGA-BP-4798-01	11.1306
TCGA-BP-4799-01	8.93369
TCGA-BP-4801-01	11.9679
TCGA-BP-4803-01	10.1046
TCGA-BP-4804-01	11.0451
TCGA-BP-4807-01	10.6257
TCGA-BP-4959-01	11.9758
TCGA-BP-4960-01	12.2603
TCGA-BP-4961-01	9.92035
TCGA-BP-4962-01	11.4247
TCGA-BP-4963-01	12.0014
TCGA-BP-4964-01	10.9986
TCGA-BP-4965-01	10.4273
TCGA-BP-4967-01	10.8642
TCGA-BP-4968-01	11.3163
TCGA-BP-4969-01	11.0307
TCGA-BP-4970-01	11.1098
TCGA-BP-4971-01	14.1527
TCGA-BP-4972-01	12.4964
TCGA-BP-4973-01	12.2866
TCGA-BP-4974-01	11.7082
TCGA-BP-4975-01	11.0848
TCGA-BP-4976-01	9.94251
TCGA-BP-4977-01	12.1075
TCGA-BP-4981-01	11.3832
TCGA-BP-4982-01	11.6119
TCGA-BP-4983-01	13.0721
TCGA-BP-4985-01	11.0875
TCGA-BP-4986-01	11.2544
TCGA-BP-4987-01	10.9922
TCGA-BP-4989-01	12.9383
TCGA-BP-4991-01	11.4722
TCGA-BP-4992-01	12.584
TCGA-BP-4993-01	9.75822
TCGA-BP-4994-01	10.421
TCGA-BP-4995-01	10.722
TCGA-BP-4998-01	12.2923
TCGA-BP-4999-01	10.8757
TCGA-BP-5000-01	10.7797
TCGA-BP-5001-01	11.1536
TCGA-BP-5004-01	11.6161
TCGA-BP-5006-01	11.42
TCGA-BP-5007-01	10.8781
TCGA-BP-5008-01	12.0705
TCGA-BP-5009-01	11.0437
TCGA-BP-5010-01	9.84706
TCGA-BP-5168-01	9.86109
TCGA-BP-5169-01	11.1434
TCGA-BP-5170-01	9.88111
TCGA-BP-5173-01	10.4179
TCGA-BP-5174-01	10.4747
TCGA-BP-5175-01	9.5216
TCGA-BP-5176-01	9.5157
TCGA-BP-5177-01	8.45943
TCGA-BP-5178-01	11.5038
TCGA-BP-5180-01	11.3542
TCGA-BP-5181-01	9.81538
TCGA-BP-5182-01	12.599
TCGA-BP-5183-01	11.445
TCGA-BP-5184-01	9.44087
TCGA-BP-5185-01	8.60363
TCGA-BP-5186-01	9.98157
TCGA-BP-5187-01	7.97728
TCGA-BP-5189-01	11.3021
TCGA-BP-5190-01	10.2969
TCGA-BP-5191-01	11.4949
TCGA-BP-5192-01	8.74483
TCGA-BP-5194-01	10.9723
TCGA-BP-5195-01	10.3576
TCGA-BP-5196-01	10.0014
TCGA-BP-5198-01	11.8463
TCGA-BP-5199-01	11.5206
TCGA-BP-5200-01	10.8517
TCGA-BP-5201-01	11.2992
TCGA-BP-5202-01	10.4727
TCGA-CJ-4634-01	10.5127
TCGA-CJ-4635-01	11.4445
TCGA-CJ-4636-01	11.6917
TCGA-CJ-4637-01	11.8305
TCGA-CJ-4638-01	10.585
TCGA-CJ-4639-01	9.633
TCGA-CJ-4640-01	10.6952
TCGA-CJ-4641-01	11.8607
TCGA-CJ-4642-01	7.05528
TCGA-CJ-4643-01	11.1731
TCGA-CJ-4644-01	9.77314
TCGA-CJ-4868-01	11.1561
TCGA-CJ-4869-01	11.1472
TCGA-CJ-4870-01	9.62022
TCGA-CJ-4871-01	9.72962
TCGA-CJ-4872-01	10.1331
TCGA-CJ-4873-01	12.7074
TCGA-CJ-4874-01	10.032
TCGA-CJ-4875-01	11.2348
TCGA-CJ-4876-01	9.72281
TCGA-CJ-4878-01	10.332
TCGA-CJ-4881-01	11.7061
TCGA-CJ-4882-01	11.3729
TCGA-CJ-4884-01	12.0947
TCGA-CJ-4885-01	9.61287
TCGA-CJ-4886-01	10.4553
TCGA-CJ-4887-01	11.9259
TCGA-CJ-4888-01	12.2659
TCGA-CJ-4889-01	11.0437
TCGA-CJ-4890-01	12.8694
TCGA-CJ-4891-01	12.8182
TCGA-CJ-4892-01	10.8455
TCGA-CJ-4893-01	10.5765
TCGA-CJ-4894-01	11.6649
TCGA-CJ-4895-01	10.1254
TCGA-CJ-4897-01	9.99435
TCGA-CJ-4899-01	11.8784
TCGA-CJ-4900-01	12.6558
TCGA-CJ-4901-01	12.1805
TCGA-CJ-4902-01	12.2243
TCGA-CJ-4903-01	11.0668
TCGA-CJ-4904-01	10.8114
TCGA-CJ-4905-01	9.57554
TCGA-CJ-4907-01	10.5294
TCGA-CJ-4908-01	11.3276
TCGA-CJ-4912-01	10.7895
TCGA-CJ-4916-01	12.0095
TCGA-CJ-4918-01	10.1624
TCGA-CJ-4920-01	10.2726
TCGA-CJ-5671-01	12.0454
TCGA-CJ-5672-01	11.0112
TCGA-CJ-5672-11	6.14975
TCGA-CJ-5675-01	11.3202
TCGA-CJ-5684-01	9.87498
TCGA-CJ-5686-01	10.8918
TCGA-CJ-6027-01	10.8009
TCGA-CJ-6028-01	10.7895
TCGA-CJ-6031-01	11.1273
TCGA-CJ-6032-01	10.196
TCGA-CW-5583-01	8.94251
TCGA-CW-5588-01	10.0498
TCGA-CW-5590-01	10.0741
TCGA-CW-6093-01	9.31061
TCGA-CW-6097-01	11.1072
TCGA-CZ-4853-01	10.6092
TCGA-CZ-4854-01	11.0437
TCGA-CZ-4856-01	9.80574
TCGA-CZ-4857-01	10.8918
TCGA-CZ-4858-01	10.4147
TCGA-CZ-4859-01	9.15482
TCGA-CZ-4860-01	11.8118
TCGA-CZ-4861-01	11.8853
TCGA-CZ-4862-01	11.2228
TCGA-CZ-4866-01	12.1302
TCGA-DV-5565-01	10.4635
TCGA-DV-5566-01	9.37504
TCGA-DV-5567-01	8.73132
TCGA-DV-5568-01	10.5108
TCGA-DV-5569-01	11.0238
TCGA-DV-5573-01	11.2848
TCGA-DV-5574-01	11.4247
TCGA-DV-5575-01	10.1434
TCGA-DV-5576-01	7.60733
TCGA-DV-A4VX-01	11.4173
TCGA-DV-A4VZ-01	9.07948
TCGA-DV-A4W0-01	11.3658
TCGA-DV-A4W0-05	8.96867
TCGA-EU-5904-01	9.49386
TCGA-EU-5905-01	8.15482
TCGA-EU-5906-01	11.0251
TCGA-EU-5907-01	8.88264
TCGA-G6-A5PC-01	9.50581
TCGA-G6-A8L6-01	10.4409
TCGA-G6-A8L7-01	8.06609
TCGA-G6-A8L8-01	10.1033
TCGA-GK-A6C7-01	10.3955
TCGA-MM-A563-01	11.6948
TCGA-MM-A564-01	9.48382
TCGA-MM-A84U-01	10.6636
TCGA-MW-A4EC-01	10.4009
TCGA-T7-A92I-01	11.233

## Sheet: Sheet2
Tag	ENSG00000140678	Tag	ENSG00000140678				1-tumor
TCGA-A3-3358-01	11.8514	TCGA-A3-3358-11	7.48382				11-normal
TCGA-A3-3387-01	11.4969	TCGA-A3-3387-11	6.59991
TCGA-B0-4700-01	11.0761	TCGA-B0-4700-11	7.43463
TCGA-B0-4712-01	10.7731	TCGA-B0-4712-11	6.64386
TCGA-B0-5402-01	9.87191	TCGA-B0-5402-11	8.82972
TCGA-B0-5690-01	10.3869	TCGA-B0-5690-11	6.39232
TCGA-B0-5691-01	9.61102	TCGA-B0-5691-11	9.84235
TCGA-B0-5694-01	9.63662	TCGA-B0-5694-11	8.66178
TCGA-B0-5696-01	8.91588	TCGA-B0-5696-11	7.48382
TCGA-B0-5697-01	11.4325	TCGA-B0-5697-11	5.08746
TCGA-B0-5699-01	10.9204	TCGA-B0-5699-11	5.83289
TCGA-B0-5701-01	10.1447	TCGA-B0-5701-11	8.7211
TCGA-B0-5703-01	8.27612	TCGA-B0-5703-11	6.47573
TCGA-B0-5705-01	10.4929	TCGA-B0-5705-11	7.2854
TCGA-B0-5706-01	8.48382	TCGA-B0-5706-11	5.83289
TCGA-B0-5709-01	11.5319	TCGA-B0-5709-11	8.2854
TCGA-B0-5711-01	10.2288	TCGA-B0-5711-11	7.27612
TCGA-B0-5712-01	8.62571	TCGA-B0-5712-11	8.78463
TCGA-B2-5636-01	8.91886	TCGA-B2-5636-11	8.93664
TCGA-B2-5641-01	11.3955	TCGA-B2-5641-11	5.58496
TCGA-B8-4619-01	7.7879	TCGA-B8-4619-11	7.33092
TCGA-B8-4622-01	11.3078	TCGA-B8-4622-11	8.09803
TCGA-B8-4620-01	11.525	TCGA-B8-4620-11	8.8009
TCGA-B8-5549-01	10.2046	TCGA-B8-5549-11	6.35755
TCGA-B8-5552-01	11.1935	TCGA-B8-5552-11	9.2854
TCGA-CJ-5676-01	9.72962	TCGA-CJ-5676-11	8.52356
TCGA-CJ-5677-01	10.8556	TCGA-CJ-5677-11	7.74147
TCGA-CJ-5678-01	10.821	TCGA-CJ-5678-11	7.36632
TCGA-CJ-5679-01	8.03892	TCGA-CJ-5679-11	7.78136
TCGA-CJ-5680-01	10.4543	TCGA-CJ-5680-11	10.8384
TCGA-CJ-5681-01	12.967	TCGA-CJ-5681-11	6.56986
TCGA-CJ-5682-01	8.70044	TCGA-CJ-5683-01	9.59246
TCGA-CJ-5689-01	9.80896	TCGA-CJ-5689-11	8.14975
TCGA-CJ-6030-01	11.5868	TCGA-CJ-6030-11	8.633
TCGA-CJ-6033-01	9.69523	TCGA-CJ-6033-11	7.70044
TCGA-CW-5580-01	11.1228	TCGA-CW-5580-11	7.8392
TCGA-CW-5581-01	10.4584	TCGA-CW-5581-11	6.44294
TCGA-CW-5584-01	10.9256	TCGA-CW-5584-11	9.57365
TCGA-CW-5585-01	9.26444	TCGA-CW-5585-11	6.53916
TCGA-CW-5587-01	11.357	TCGA-CW-5587-11	7.26679
TCGA-CW-5589-01	10.8146	TCGA-CW-5589-11	7.49985
TCGA-CW-5591-01	8.02791	TCGA-CW-5591-11	10.5784
TCGA-CW-6087-01	10.0526	TCGA-CW-6087-11	6.20945
TCGA-CW-6088-01	10.3718	TCGA-CW-6088-11	5.67243
TCGA-CW-6090-01	11.1586	TCGA-CW-6090-11	6.70044
TCGA-CZ-4863-01	11.2064	TCGA-CZ-4863-11	6.22882
TCGA-CZ-4864-01	11.8815	TCGA-CZ-4864-11	7.41785
TCGA-CZ-4865-01	10.5953	TCGA-CZ-4865-11	6.47573
TCGA-CZ-5451-01	9.84706	TCGA-CZ-5451-11	7.32193
TCGA-CZ-5452-01	11.6036	TCGA-CZ-5452-11	5.52356
TCGA-CZ-5453-01	9.24079	TCGA-CZ-5453-11	7
TCGA-CZ-5454-01	12.265	TCGA-CZ-5454-11	7.25739
TCGA-CZ-5455-01	11.4656	TCGA-CZ-5455-11	6.04439
TCGA-CZ-5456-01	10.3619	TCGA-CZ-5456-11	5.39232
TCGA-CZ-5457-01	10.0875	TCGA-CZ-5457-11	7.40939
TCGA-CZ-5458-01	10.1836	TCGA-CZ-5458-11	5.83289
TCGA-CZ-5461-01	9.55842	TCGA-CZ-5461-11	6.88264
TCGA-CZ-5462-01	11.115	TCGA-CZ-5462-11	7.73471
TCGA-CZ-5463-01	11.0908	TCGA-CZ-5463-11	7.17991
TCGA-CZ-5465-01	10.716	TCGA-CZ-5465-11	5.70044
TCGA-CZ-5466-01	11.4398	TCGA-CZ-5466-11	8.5157
TCGA-CZ-5467-01	8.99718	TCGA-CZ-5467-11	6.47573
TCGA-CZ-5468-01	10.8796	TCGA-CZ-5468-11	6.44294
TCGA-CZ-5469-01	10.813	TCGA-CZ-5469-11	5.04439
TCGA-CZ-5470-01	11.3487	TCGA-CZ-5470-11	6.35755
TCGA-CZ-5982-01	9.49386	TCGA-CZ-5982-11	4.70044
TCGA-CZ-5984-01	10.2609	TCGA-CZ-5984-11	7.03342
TCGA-CZ-5985-01	11.9039	TCGA-CZ-5985-11	5.90689
TCGA-CZ-5986-01	10.1137	TCGA-CZ-5986-11	6.56986
TCGA-CZ-5987-01	10.3276	TCGA-CZ-5987-11	8.61839
TCGA-CZ-5988-01	8.84235	TCGA-CZ-5988-11	6.35755
TCGA-CZ-5989-01	7.80735	TCGA-CZ-5989-11	8.7211
