# Supplementary material for: Prediction and analysis of novel key genes ITGAX, LAPTM5, SERPINE1 in clear cell renal cell carcinoma through bioinformatics analysis
Source: PeerJ. 2021 Apr 20;9:e11272. doi: 10.7717/peerj.11272 (PMC8063882; doi:10.7717/peerj.11272)
Supplement: Supplemental Information 15 [file peerj-09-11272-s015.xlsx]

## Sheet: LAPTM5-TCGA_Exp_convertlog
Tag	ENSG00000162511
TCGA-A3-3308-01	13.5155
TCGA-CJ-5672-01	14.5459
TCGA-CJ-5680-01	13.9469
TCGA-CZ-5465-01	13.6601
TCGA-B0-5096-01	14.9511
TCGA-B8-4153-01	12.7609
TCGA-BP-4964-01	14.1956
TCGA-A3-3324-01	14.2095
TCGA-CJ-4644-01	14.4509
TCGA-B0-5088-01	14.4478
TCGA-BP-4169-01	14.8452
TCGA-BP-4177-01	12.6152
TCGA-AK-3428-01	12.9832
TCGA-CJ-5689-01	14.4167
TCGA-CJ-4634-01	13.6942
TCGA-BP-4774-01	13.2581
TCGA-CZ-4856-01	14.6194
TCGA-BP-4959-01	15.4303
TCGA-B0-5100-01	13.1157
TCGA-CJ-4872-01	14.3626
TCGA-CZ-4854-01	13.7461
TCGA-BP-4768-01	13.5898
TCGA-CZ-5982-01	13.1082
TCGA-BP-4174-01	14.4729
TCGA-BP-4325-01	14.1427
TCGA-BP-4801-01	14.8575
TCGA-MM-A563-01	14.3922
TCGA-BP-4331-01	14.7822
TCGA-B0-5697-01	15.2103
TCGA-B0-4839-01	14.5587
TCGA-CJ-4889-01	14.8054
TCGA-B4-5836-01	13.9047
TCGA-B8-4620-01	14.2666
TCGA-MM-A84U-01	13.665
TCGA-CJ-5686-01	14.8592
TCGA-CW-5585-01	12.5675
TCGA-B2-4101-01	13.9444
TCGA-BP-4962-01	15.2699
TCGA-CZ-5460-01	14.524
TCGA-CZ-5459-01	13.4974
TCGA-BP-5168-01	13.2104
TCGA-BP-4781-01	14.3232
TCGA-B8-5553-01	14.8189
TCGA-B0-4945-01	12.9198
TCGA-CJ-4905-01	13.7541
TCGA-BP-5178-01	15.5312
TCGA-BP-4799-01	13.3095
TCGA-B0-4691-01	13.7009
TCGA-CW-5588-01	14.801
TCGA-B8-5164-01	15.9396
TCGA-BP-4798-01	15.8003
TCGA-BP-4970-01	15.4091
TCGA-CJ-4876-01	12.7591
TCGA-CJ-4871-01	13.8848
TCGA-B0-5690-01	13.5542
TCGA-CJ-4900-01	14.8839
TCGA-BP-4967-01	13.6621
TCGA-MW-A4EC-01	13.1243
TCGA-B0-5115-01	13.7007
TCGA-BP-4961-01	14.0843
TCGA-CZ-5451-01	13.3919
TCGA-A3-3378-01	15.5464
TCGA-B0-5080-01	14.4914
TCGA-CZ-5461-01	14.7118
TCGA-CW-6087-01	16.9997
TCGA-B0-4690-01	15.6479
TCGA-BP-4986-01	14.6624
TCGA-CJ-4870-01	13.5453
TCGA-CJ-6031-01	15.1765
TCGA-B0-5097-01	14.6221
TCGA-B4-5844-01	12.9121
TCGA-BP-4337-01	13.568
TCGA-BP-4782-01	14.6422
TCGA-A3-3313-01	12.475
TCGA-CJ-5677-01	14.5773
TCGA-A3-3385-01	13.1588
TCGA-B2-5633-01	12.9453
TCGA-BP-4989-01	15.4853
TCGA-AK-3447-01	9.65821
TCGA-CZ-5452-01	15.2903
TCGA-BP-5175-01	13.4102
TCGA-B0-4833-01	13.2808
TCGA-B4-5377-01	14.5846
TCGA-CJ-5676-01	14.4808
TCGA-CZ-4866-01	15.1333
TCGA-BP-5200-01	14.7538
TCGA-AK-3427-01	10.6537
TCGA-B0-5109-01	14.0991
TCGA-B0-5701-01	13.4708
TCGA-BP-4803-01	13.8174
TCGA-BP-4993-01	13.8508
TCGA-CJ-6028-01	14.6516
TCGA-CJ-4643-01	14.1278
TCGA-B8-A54D-01	13.6629
TCGA-B2-5633-01_Rep94	14.1933
TCGA-BP-4166-01	13.7078
TCGA-B0-5121-01	14.0503
TCGA-CJ-4639-01	12.9796
TCGA-B0-5711-01	13.8083
TCGA-DV-5569-01	14.4755
TCGA-BP-4759-01	13.5447
TCGA-B2-3923-01	11.6869
TCGA-BP-5196-01	14.1364
TCGA-B0-5081-01	15.4352
TCGA-B0-5693-01	12.7903
TCGA-AK-3451-01	13.7536
TCGA-AK-3440-01	11.4205
TCGA-B0-4852-01	14.0154
TCGA-BP-5174-01	13.7061
TCGA-BP-5173-01	14.0582
TCGA-A3-3316-01	13.4867
TCGA-BP-4173-01	15.9186
TCGA-B0-4842-01	14.7906
TCGA-B4-5832-01	13.7378
TCGA-A3-A6NI-01	14.2211
TCGA-BP-5169-01	14.0688
TCGA-DV-A4VX-01	13.2001
TCGA-G6-A8L6-01	13.6329
TCGA-B0-5399-01	14.0487
TCGA-BP-4338-01	14.7492
TCGA-BP-4353-01	15.0823
TCGA-A3-3370-01	14.8404
TCGA-BP-4968-01	14.4651
TCGA-CJ-4890-01	16.3043
TCGA-BP-5004-01	14.3493
TCGA-BP-4975-01	14.5545
TCGA-A3-3372-01	13.8616
TCGA-CJ-4869-01	15.4826
TCGA-CJ-4920-01	13.6148
TCGA-BP-4766-01	14.2676
TCGA-GK-A6C7-01	13.6437
TCGA-B0-4819-01	15.1868
TCGA-DV-A4W0-01	13.1082
TCGA-BP-5192-01	12.3987
TCGA-DV-5566-01	13.145
TCGA-BP-4326-01	13.3624
TCGA-B2-5636-01	13.325
TCGA-DV-5573-01	14.9058
TCGA-CW-5584-01	14.3194
TCGA-BP-4352-01	12.188
TCGA-B0-4706-01	12.5098
TCGA-A3-A8OW-01	13.2192
TCGA-CJ-4893-01	14.5081
TCGA-B0-5705-01	14.1446
TCGA-CJ-4642-01	9.43254
TCGA-DV-5575-01	13.9992
TCGA-BP-4977-01	14.3769
TCGA-CZ-5988-01	13.0298
TCGA-CJ-6027-01	15.2929
TCGA-A3-3311-01	14.6068
TCGA-CZ-5456-01	14.9216
TCGA-BP-5177-01	12.5038
TCGA-A3-3343-01	14.4608
TCGA-B0-4816-01	15.5738
TCGA-BP-5180-01	14.8014
TCGA-B4-5843-01	13.4351
TCGA-BP-4804-01	14.5223
TCGA-AK-3426-01	15.6098
TCGA-BP-4982-01	14.5798
TCGA-B8-5552-01	14.666
TCGA-CJ-5671-01	15.3472
TCGA-B0-5702-01	14.0192
TCGA-B0-5700-01	13.1111
TCGA-B2-5639-01	13.5651
TCGA-CW-5591-01	12.5892
TCGA-B0-4821-01	13.2599
TCGA-AK-3465-01	11.8704
TCGA-CZ-4860-01	14.6714
TCGA-B4-5834-01	13.5948
TCGA-CZ-4864-01	15.5653
TCGA-CJ-5675-01	15.4639
TCGA-CW-6097-01	14.9633
TCGA-A3-3331-01	14.0168
TCGA-CZ-5987-01	13.9341
TCGA-A3-3359-01	13.8779
TCGA-CJ-5682-01	13.1884
TCGA-B0-5402-01	13.5283
TCGA-BP-4343-01	15.2252
TCGA-CZ-4865-01	15.13
TCGA-EU-5904-01	13.3451
TCGA-A3-3358-01	15.1869
TCGA-A3-A8CQ-01	13.1312
TCGA-A3-3325-01	14.6714
TCGA-CJ-4886-01	13.9798
TCGA-B4-5838-01	13.426
TCGA-BP-4332-01	13.6125
TCGA-A3-A8OV-01	13.2513
TCGA-CZ-5468-01	14.1759
TCGA-B0-4846-01	14.2272
TCGA-B0-5400-01	14.2397
TCGA-BP-4762-01	14.504
TCGA-BP-4758-01	14.5919
TCGA-B0-5085-01	12.9196
TCGA-CW-6088-01	13.4699
TCGA-CJ-4912-01	13.0225
TCGA-B0-4836-01	13.8294
TCGA-A3-3374-01	15.3684
TCGA-AK-3450-01	13.0218
TCGA-B0-4701-01	13.92
TCGA-BP-4985-01	13.6422
TCGA-BP-4790-01	14.5777
TCGA-A3-3376-01	14.9605
TCGA-B0-4813-01	12.816
TCGA-B8-4143-01	14.1857
TCGA-A3-3363-01	14.3371
TCGA-B0-4838-01	14.6446
TCGA-B0-5699-01	13.7901
TCGA-6D-AA2E-01	12.3177
TCGA-G6-A5PC-01	13.8923
TCGA-AK-3429-01	14.1966
TCGA-B0-4817-01	13.5772
TCGA-CZ-5470-01	15.244
TCGA-A3-A8OU-01	13.7283
TCGA-B0-5706-01	12.764
TCGA-CJ-5679-01	12.3351
TCGA-CZ-4853-01	13.7545
TCGA-A3-3307-01	13.7737
TCGA-A3-A6NL-01	13.9502
TCGA-A3-3387-01	15.2613
TCGA-CJ-4888-01	15.7094
TCGA-B0-4834-01	10.8009
TCGA-B0-4811-01	13.1077
TCGA-BP-4965-01	14.5825
TCGA-BP-4340-01	12.8325
TCGA-B0-5108-01	15.2492
TCGA-CZ-5455-01	15.7054
TCGA-B0-5102-01	13.6869
TCGA-B2-4098-01	13.8682
TCGA-B0-4697-01	13.6888
TCGA-AK-3433-01	11.2192
TCGA-CJ-4874-01	14.3292
TCGA-DV-5576-01	12.0307
TCGA-B8-5159-01	14.0611
TCGA-B0-4700-01	14.9258
TCGA-T7-A92I-01	12.9982
TCGA-B0-5709-01	15.3245
TCGA-B8-5163-01	15.9183
TCGA-BP-4170-01	14.7788
TCGA-DV-5567-01	12.9887
TCGA-CJ-4637-01	15.5868
TCGA-B0-4688-01	14.1162
TCGA-B2-5635-01	14.7709
TCGA-BP-4960-01	14.4121
TCGA-BP-5001-01	12.8519
TCGA-BP-4164-01	12.5457
TCGA-BP-4763-01	13.5527
TCGA-AK-3460-01	13.1596
TCGA-BP-4335-01	12.9766
TCGA-BP-5010-01	13.3529
TCGA-CJ-4881-01	14.5764
TCGA-BP-4344-01	13.7384
TCGA-BP-4995-01	14.0308
TCGA-BP-4999-01	13.7801
TCGA-BP-5000-01	14.3516
TCGA-A3-3382-01	13.9328
TCGA-CW-5581-01	13.2786
TCGA-AK-3456-01	13.7413
TCGA-BP-4776-01	12.994
TCGA-B0-5703-01	12.4086
TCGA-BP-4334-01	11.4226
TCGA-A3-3367-01	14.3195
TCGA-BP-5176-01	13.6979
TCGA-BP-5201-01	14.3014
TCGA-CW-6090-01	15.2713
TCGA-CZ-4858-01	14.3996
TCGA-CZ-5464-01	15.1188
TCGA-A3-3380-01	13.8575
TCGA-BP-4351-01	13.1499
TCGA-DV-5565-01	13.7181
TCGA-B8-A54F-01	13.1347
TCGA-BP-4167-01	15.3264
TCGA-EU-5906-01	14.7124
TCGA-B2-3923-01_Rep272	10.3542
TCGA-CW-5590-01	14.0459
TCGA-B8-4146-01	14.1155
TCGA-A3-3349-01	13.7025
TCGA-A3-3352-01	14.1777
TCGA-B0-4849-01	13.5013
TCGA-BP-4991-01	14.0734
TCGA-B0-5713-01	13.4881
TCGA-BP-5186-01	13.4165
TCGA-CJ-4885-01	13.7245
TCGA-G6-A8L8-01	11.6693
TCGA-B2-3924-01	12.3185
TCGA-CZ-5454-01	16.23
TCGA-CJ-4873-01	15.0863
TCGA-B4-5835-01	14.3708
TCGA-BP-4973-01	14.3744
TCGA-B0-5812-01	13.9485
TCGA-CJ-4641-01	15.2679
TCGA-B0-5710-01	13.384
TCGA-BP-4992-01	13.7663
TCGA-A3-A8OX-01	14.0352
TCGA-B0-5695-01	13.1969
TCGA-B0-5691-01	13.0901
TCGA-AK-3425-01	15.0384
TCGA-BP-4347-01	13.5258
TCGA-BP-4354-01	15.5594
TCGA-BP-4345-01	14.6238
TCGA-CJ-6032-01	13.7137
TCGA-BP-4355-01	12.7486
TCGA-B8-5550-01	14.1773
TCGA-BP-4163-01	14.1064
TCGA-CZ-4863-01	15.0225
TCGA-BP-4971-01	14.6261
TCGA-BP-4327-01	13.0179
TCGA-A3-3323-01	13.9647
TCGA-CJ-4636-01	14.8672
TCGA-BP-4974-01	13.581
TCGA-B0-5098-01	11.1911
TCGA-B0-5707-01	13.1788
TCGA-A3-3335-01	14.3589
TCGA-CJ-4640-01	14.9873
TCGA-B2-5633-01_Rep313	12.187
TCGA-G6-A8L7-01	12.1286
TCGA-B8-4622-01	14.3248
TCGA-B0-5094-01	13.3577
TCGA-CZ-5469-01	14.1287
TCGA-BP-4342-01	13.8584
TCGA-B8-A54I-01	14.5897
TCGA-CJ-4884-01	14.7689
TCGA-BP-5181-01	13.5074
TCGA-A3-3362-01	13.1183
TCGA-B0-5712-01	12.8453
TCGA-A3-3373-01	14.3521
TCGA-A3-3365-01	13.732
TCGA-BP-4976-01	14.0847
TCGA-DV-5568-01	14.319
TCGA-CZ-4859-01	13.1607
TCGA-BP-5183-01	14.1763
TCGA-BP-4761-01	13.881
TCGA-B2-3924-01_Rep331	15.0178
TCGA-B8-5162-01	16.1208
TCGA-BP-4771-01	15.4383
TCGA-CJ-4908-01	14.1464
TCGA-BP-5184-01	13.7967
TCGA-B0-4699-01	15.4351
TCGA-A3-A6NN-01	14.0213
TCGA-CJ-4868-01	14.5481
TCGA-B0-5075-01	15.725
TCGA-A3-3306-01	13.3641
TCGA-B8-5546-01	11.1163
TCGA-BP-5202-01	13.9184
TCGA-BP-4981-01	13.6629
TCGA-B0-4693-01	13.3779
TCGA-B8-A7U6-01	13.5008
TCGA-BP-5194-01	14.3125
TCGA-A3-3320-01	13.5007
TCGA-BP-4341-01	12.7597
TCGA-BP-4969-01	11.9819
TCGA-B0-5116-01	12.5622
TCGA-B0-5692-01	14.6489
TCGA-B0-4815-01	15.1798
TCGA-B0-4814-01	12.9287
TCGA-B0-4698-01	14.7387
TCGA-B8-A54G-01	15.4484
TCGA-BP-4760-01	13.5038
TCGA-CJ-4901-01	15.1321
TCGA-B2-3923-01_Rep358	10.6883
TCGA-CJ-4878-01	12.365
TCGA-B0-4843-01	13.0163
TCGA-B0-4841-01	12.7824
TCGA-CJ-4891-01	14.6877
TCGA-CJ-4907-01	14.1278
TCGA-A3-3351-01	14.5945
TCGA-B0-5104-01	13.7928
TCGA-B0-5099-01	11.7723
TCGA-BP-4165-01	12.9022
TCGA-A3-3328-01	10.6821
TCGA-B8-A54K-01	11.4671
TCGA-BP-4987-01	13.7645
TCGA-BP-5008-01	14.5425
TCGA-A3-3357-01	14.8245
TCGA-B2-3924-01_Rep373	12.9217
TCGA-BP-5198-01	15.3451
TCGA-B0-4810-01	14.72
TCGA-EU-5905-01	13.272
TCGA-BP-4994-01	13.561
TCGA-BP-5170-01	14.2423
TCGA-CW-5583-01	12.9669
TCGA-AS-3777-01	12.3454
TCGA-B0-4818-01	13.8699
TCGA-BP-4998-01	15.0009
TCGA-CJ-4899-01	14.5267
TCGA-B2-4099-01	14.435
TCGA-MM-A564-01	12.5292
TCGA-B0-5106-01	14.3442
TCGA-B8-5165-01	13.725
TCGA-B0-5694-01	13.3692
TCGA-CJ-4897-01	14.1449
TCGA-B8-A8YJ-01	14.4439
TCGA-BP-4770-01	14.7863
TCGA-BP-4784-01	13.1333
TCGA-B0-5113-01	14.2076
TCGA-CJ-4875-01	13.7288
TCGA-B0-5696-01	13.3464
TCGA-A3-3317-01	14.1727
TCGA-B0-5077-01	14.0443
TCGA-CW-6093-01	13.3541
TCGA-BP-4963-01	14.6835
TCGA-BP-4789-01	13.2556
TCGA-B0-4694-01	15.8214
TCGA-AK-3431-01	13.6821
TCGA-BP-5199-01	15.0212
TCGA-B0-5698-01	15.0228
TCGA-CW-5587-01	15.2202
TCGA-CJ-4638-01	11.8218
TCGA-B0-5083-01	14.1569
TCGA-CJ-4903-01	14.514
TCGA-BP-5185-01	12.4486
TCGA-CZ-5466-01	14.7137
TCGA-BP-5187-01	12.8521
TCGA-DV-5574-01	15.4043
TCGA-AK-3454-01	12.7867
TCGA-BP-4797-01	15.0342
TCGA-CJ-5681-01	12.6815
TCGA-BP-4983-01	15.567
TCGA-BP-4349-01	13.2405
TCGA-B0-4710-01	13.4708
TCGA-A3-3319-01	14.7646
TCGA-B4-5378-01	13.2572
TCGA-BP-4329-01	14.3455
TCGA-B0-4713-01	12.4653
TCGA-AK-3434-01	13.2861
TCGA-AK-3455-01	13.8188
TCGA-CZ-4861-01	16.1344
TCGA-BP-5006-01	13.9157
TCGA-CZ-5989-01	13.9347
TCGA-B8-4151-01	13.118
TCGA-A3-3347-01	15.0094
TCGA-CJ-4918-01	14.4082
TCGA-BP-4162-01	14.3131
TCGA-CJ-4894-01	14.4506
TCGA-CJ-4892-01	14.1111
TCGA-3Z-A93Z-01	12.6129
TCGA-BP-5189-01	15.4127
TCGA-B8-4621-01	14.6806
TCGA-B8-5551-01	15.9576
TCGA-BP-4330-01	14.697
TCGA-B8-5545-01	14.5801
TCGA-CJ-4887-01	14.854
TCGA-BP-4176-01	15.1872
TCGA-B0-4823-01	14.6074
TCGA-BP-4795-01	13.8906
TCGA-CJ-4895-01	14.5119
TCGA-AK-3445-01	14.2768
TCGA-B0-5120-01	14.1572
TCGA-CJ-4882-01	14.0571
TCGA-AK-3436-01	13.2729
TCGA-CW-5580-01	14.5784
TCGA-B8-4148-01	14.5063
TCGA-B8-4154-01	14.0333
TCGA-BP-4765-01	13.5868
TCGA-BP-4777-01	15.1874
TCGA-AS-3778-01	13.823
TCGA-B0-5095-01	13.7317
TCGA-CZ-5985-01	15.2249
TCGA-BP-5195-01	14.5896
TCGA-B0-5119-01	13.4757
TCGA-CZ-5458-01	14.497
TCGA-B0-4822-01	14.109
TCGA-CW-5589-01	14.2379
TCGA-BP-5182-01	15.6403
TCGA-A3-3326-01	13.3288
TCGA-AK-3443-01	9.8857
TCGA-BP-4972-01	15.7239
TCGA-BP-4775-01	13.5451
TCGA-B0-4847-01	14.3357
TCGA-AK-3453-01	13.8775
TCGA-BP-5190-01	13.2556
TCGA-B8-A54E-01	12.3075
TCGA-B8-A54H-01	13.9304
TCGA-B0-4707-01	11.3778
TCGA-B2-A4SR-01	13.5401
TCGA-B8-4619-01	11.3365
TCGA-B0-4828-01	12.3518
TCGA-B0-4827-01	14.8463
TCGA-BP-5191-01	14.9805
TCGA-BP-4158-01	13.0517
TCGA-BP-5007-01	13.729
TCGA-CZ-5463-01	14.5146
TCGA-B0-5092-01	14.5077
TCGA-B2-5635-01_Rep482	13.4323
TCGA-A3-3322-01	13.1716
TCGA-CJ-4916-01	15.1939
TCGA-AK-3458-01	12.8727
TCGA-A3-3329-01	14.1908
TCGA-A3-3383-01	13.9425
TCGA-CJ-4635-01	14.0552
TCGA-A3-A6NJ-01	14.4712
TCGA-B0-5084-01	13.502
TCGA-BP-4769-01	12.1898
TCGA-BP-4160-01	14.4552
TCGA-B2-5641-01	15.3679
TCGA-BP-4161-01	14.757
TCGA-CZ-5457-01	14.5593
TCGA-B0-4718-01	12.9153
TCGA-DV-A4VZ-01	11.4215
TCGA-B8-A54J-01	13.4863
TCGA-BP-5009-01	14.847
TCGA-CJ-5678-01	14.2636
TCGA-CZ-4857-01	14.1369
TCGA-CJ-6033-01	14.2919
TCGA-CZ-5984-01	14.8337
TCGA-B0-5110-01	13.471
TCGA-B0-4696-01	13.3283
TCGA-B0-4844-01	13.243
TCGA-B0-4714-01	14.1269
TCGA-B0-5117-01	11.0265
TCGA-CZ-5467-01	13.903
TCGA-CZ-5453-01	12.9065
TCGA-B0-4845-01	12.8997
TCGA-BP-4807-01	14.2577
TCGA-CZ-4862-01	14.3511
TCGA-BP-4346-01	14.6928
TCGA-B0-4712-01	15.0218
TCGA-CJ-4904-01	14.4888
TCGA-CZ-5986-01	12.986
TCGA-A3-3346-01	15.0124
TCGA-CJ-5684-01	14.0675
TCGA-CJ-4902-01	15.0288
TCGA-CJ-6030-01	15.6627
TCGA-B0-4703-01	14.2978
TCGA-B0-4837-01	13.3773
TCGA-AK-3461-01	13.3453
TCGA-BP-4159-01	13.5895
TCGA-B2-5635-01_Rep526	13.0866
TCGA-CJ-5683-01	13.5158
TCGA-BP-4756-01	13.2435
TCGA-EU-5907-01	12.5715
TCGA-B8-5549-01	14.2257
TCGA-BP-4787-01	14.7744
TCGA-B0-5107-01	14.1219
TCGA-CZ-5462-01	14.2243
TCGA-B8-5158-01	15.0298
TCGA-B0-4848-01	14.6848
TCGA-B2-4102-01	14.5478
TCGA-B0-4824-01	13.8966
TCGA-DV-A4W0-05	11.8876
TCGA-CZ-5989-11	12.1558
TCGA-CZ-5987-11	12.7723
TCGA-CZ-5985-11	9.68124
TCGA-CZ-5455-11	10.9233
TCGA-CZ-5451-11	11.0478
TCGA-CZ-5984-11	11.2336
TCGA-B8-5552-11	13.5509
TCGA-CZ-5982-11	9.97011
TCGA-B0-5697-11	9.72792
TCGA-CJ-5678-11	11.7296
TCGA-CW-5584-11	12.8236
TCGA-CW-5587-11	11.1948
TCGA-CZ-4863-11	11.0828
TCGA-CZ-5988-11	10.218
TCGA-CW-5589-11	11.2877
TCGA-CW-5585-11	11.3993
TCGA-CJ-5689-11	12.0035
TCGA-B8-4622-11	13.2647
TCGA-B8-4620-11	12.9465
TCGA-B2-5636-11	11.9851
TCGA-B0-5699-11	10.3619
TCGA-CZ-5457-11	12.1154
TCGA-CJ-5681-11	10.5401
TCGA-CZ-5462-11	12.3904
TCGA-B0-5694-11	12.4663
TCGA-CZ-5469-11	10.3955
TCGA-CJ-6033-11	11.1662
TCGA-CZ-5461-11	11.8293
TCGA-CW-6088-11	10.1548
TCGA-B8-5549-11	10.5068
TCGA-CW-6090-11	10.2348
TCGA-CW-6087-11	11.1066
TCGA-CW-5580-11	11.7524
TCGA-CZ-5466-11	12.9819
TCGA-B8-4619-11	11.526
TCGA-B0-5705-11	11.3696
TCGA-CJ-5676-11	12.7553
TCGA-CZ-5452-11	9.80574
TCGA-CZ-5986-11	10.4553
TCGA-B0-5711-11	11.1338
TCGA-B0-4700-11	10.6627
TCGA-CZ-5456-11	9.89785
TCGA-CJ-5677-11	11.0154
TCGA-B0-5703-11	10.5641
TCGA-CW-5581-11	10.1331
TCGA-B0-5701-11	12.8416
TCGA-B0-5709-11	11.6096
TCGA-CZ-5453-11	11.5028
TCGA-CJ-5672-11	10.3923
TCGA-CZ-4865-11	11.4599
TCGA-CZ-5454-11	11.1039
TCGA-CZ-4864-11	12.0251
TCGA-CZ-5463-11	11.899
TCGA-B0-5691-11	13.0798
TCGA-CW-5591-11	14.4323
TCGA-CZ-5470-11	12.0875
TCGA-B0-5696-11	10.9571
TCGA-A3-3387-11	11.0941
TCGA-B0-5712-11	12.8285
TCGA-A3-3358-11	11.0091
TCGA-B0-5402-11	12.9586
TCGA-B0-5690-11	10.4409
TCGA-CJ-5679-11	12.245
TCGA-CZ-5465-11	10.6193
TCGA-B2-5641-11	10.2819
TCGA-CJ-5680-11	12.1991
TCGA-B0-5706-11	9.97871
TCGA-CZ-5458-11	10.0265
TCGA-CZ-5468-11	10.9622
TCGA-CZ-5467-11	11.268
TCGA-B0-4712-11	10.1254
TCGA-CJ-6030-11	12.2715

## Sheet: Sheet1
Tag	ENSG00000162511
TCGA-3Z-A93Z-01	12.6129
TCGA-6D-AA2E-01	12.3177
TCGA-A3-3306-01	13.3641
TCGA-A3-3307-01	13.7737
TCGA-A3-3308-01	13.5155
TCGA-A3-3311-01	14.6068
TCGA-A3-3313-01	12.475
TCGA-A3-3316-01	13.4867
TCGA-A3-3317-01	14.1727
TCGA-A3-3319-01	14.7646
TCGA-A3-3320-01	13.5007
TCGA-A3-3322-01	13.1716
TCGA-A3-3323-01	13.9647
TCGA-A3-3324-01	14.2095
TCGA-A3-3325-01	14.6714
TCGA-A3-3326-01	13.3288
TCGA-A3-3328-01	10.6821
TCGA-A3-3329-01	14.1908
TCGA-A3-3331-01	14.0168
TCGA-A3-3335-01	14.3589
TCGA-A3-3343-01	14.4608
TCGA-A3-3346-01	15.0124
TCGA-A3-3347-01	15.0094
TCGA-A3-3349-01	13.7025
TCGA-A3-3351-01	14.5945
TCGA-A3-3352-01	14.1777
TCGA-A3-3357-01	14.8245
TCGA-A3-3358-01	15.1869
TCGA-A3-3358-11	11.0091
TCGA-A3-3359-01	13.8779
TCGA-A3-3362-01	13.1183
TCGA-A3-3363-01	14.3371
TCGA-A3-3365-01	13.732
TCGA-A3-3367-01	14.3195
TCGA-A3-3370-01	14.8404
TCGA-A3-3372-01	13.8616
TCGA-A3-3373-01	14.3521
TCGA-A3-3374-01	15.3684
TCGA-A3-3376-01	14.9605
TCGA-A3-3378-01	15.5464
TCGA-A3-3380-01	13.8575
TCGA-A3-3382-01	13.9328
TCGA-A3-3383-01	13.9425
TCGA-A3-3385-01	13.1588
TCGA-A3-3387-01	15.2613
TCGA-A3-3387-11	11.0941
TCGA-A3-A6NI-01	14.2211
TCGA-A3-A6NJ-01	14.4712
TCGA-A3-A6NL-01	13.9502
TCGA-A3-A6NN-01	14.0213
TCGA-A3-A8CQ-01	13.1312
TCGA-A3-A8OU-01	13.7283
TCGA-A3-A8OV-01	13.2513
TCGA-A3-A8OW-01	13.2192
TCGA-A3-A8OX-01	14.0352
TCGA-AK-3425-01	15.0384
TCGA-AK-3426-01	15.6098
TCGA-AK-3427-01	10.6537
TCGA-AK-3428-01	12.9832
TCGA-AK-3429-01	14.1966
TCGA-AK-3431-01	13.6821
TCGA-AK-3433-01	11.2192
TCGA-AK-3434-01	13.2861
TCGA-AK-3436-01	13.2729
TCGA-AK-3440-01	11.4205
TCGA-AK-3443-01	9.8857
TCGA-AK-3445-01	14.2768
TCGA-AK-3447-01	9.65821
TCGA-AK-3450-01	13.0218
TCGA-AK-3451-01	13.7536
TCGA-AK-3453-01	13.8775
TCGA-AK-3454-01	12.7867
TCGA-AK-3455-01	13.8188
TCGA-AK-3456-01	13.7413
TCGA-AK-3458-01	12.8727
TCGA-AK-3460-01	13.1596
TCGA-AK-3461-01	13.3453
TCGA-AK-3465-01	11.8704
TCGA-AS-3777-01	12.3454
TCGA-AS-3778-01	13.823
TCGA-B0-4688-01	14.1162
TCGA-B0-4690-01	15.6479
TCGA-B0-4691-01	13.7009
TCGA-B0-4693-01	13.3779
TCGA-B0-4694-01	15.8214
TCGA-B0-4696-01	13.3283
TCGA-B0-4697-01	13.6888
TCGA-B0-4698-01	14.7387
TCGA-B0-4699-01	15.4351
TCGA-B0-4700-01	14.9258
TCGA-B0-4700-11	10.6627
TCGA-B0-4701-01	13.92
TCGA-B0-4703-01	14.2978
TCGA-B0-4706-01	12.5098
TCGA-B0-4707-01	11.3778
TCGA-B0-4710-01	13.4708
TCGA-B0-4712-01	15.0218
TCGA-B0-4712-11	10.1254
TCGA-B0-4713-01	12.4653
TCGA-B0-4714-01	14.1269
TCGA-B0-4718-01	12.9153
TCGA-B0-4810-01	14.72
TCGA-B0-4811-01	13.1077
TCGA-B0-4813-01	12.816
TCGA-B0-4814-01	12.9287
TCGA-B0-4815-01	15.1798
TCGA-B0-4816-01	15.5738
TCGA-B0-4817-01	13.5772
TCGA-B0-4818-01	13.8699
TCGA-B0-4819-01	15.1868
TCGA-B0-4821-01	13.2599
TCGA-B0-4822-01	14.109
TCGA-B0-4823-01	14.6074
TCGA-B0-4824-01	13.8966
TCGA-B0-4827-01	14.8463
TCGA-B0-4828-01	12.3518
TCGA-B0-4833-01	13.2808
TCGA-B0-4834-01	10.8009
TCGA-B0-4836-01	13.8294
TCGA-B0-4837-01	13.3773
TCGA-B0-4838-01	14.6446
TCGA-B0-4839-01	14.5587
TCGA-B0-4841-01	12.7824
TCGA-B0-4842-01	14.7906
TCGA-B0-4843-01	13.0163
TCGA-B0-4844-01	13.243
TCGA-B0-4845-01	12.8997
TCGA-B0-4846-01	14.2272
TCGA-B0-4847-01	14.3357
TCGA-B0-4848-01	14.6848
TCGA-B0-4849-01	13.5013
TCGA-B0-4852-01	14.0154
TCGA-B0-4945-01	12.9198
TCGA-B0-5075-01	15.725
TCGA-B0-5077-01	14.0443
TCGA-B0-5080-01	14.4914
TCGA-B0-5081-01	15.4352
TCGA-B0-5083-01	14.1569
TCGA-B0-5084-01	13.502
TCGA-B0-5085-01	12.9196
TCGA-B0-5088-01	14.4478
TCGA-B0-5092-01	14.5077
TCGA-B0-5094-01	13.3577
TCGA-B0-5095-01	13.7317
TCGA-B0-5096-01	14.9511
TCGA-B0-5097-01	14.6221
TCGA-B0-5098-01	11.1911
TCGA-B0-5099-01	11.7723
TCGA-B0-5100-01	13.1157
TCGA-B0-5102-01	13.6869
TCGA-B0-5104-01	13.7928
TCGA-B0-5106-01	14.3442
TCGA-B0-5107-01	14.1219
TCGA-B0-5108-01	15.2492
TCGA-B0-5109-01	14.0991
TCGA-B0-5110-01	13.471
TCGA-B0-5113-01	14.2076
TCGA-B0-5115-01	13.7007
TCGA-B0-5116-01	12.5622
TCGA-B0-5117-01	11.0265
TCGA-B0-5119-01	13.4757
TCGA-B0-5120-01	14.1572
TCGA-B0-5121-01	14.0503
TCGA-B0-5399-01	14.0487
TCGA-B0-5400-01	14.2397
TCGA-B0-5402-01	13.5283
TCGA-B0-5402-11	12.9586
TCGA-B0-5690-01	13.5542
TCGA-B0-5690-11	10.4409
TCGA-B0-5691-01	13.0901
TCGA-B0-5691-11	13.0798
TCGA-B0-5692-01	14.6489
TCGA-B0-5693-01	12.7903
TCGA-B0-5694-01	13.3692
TCGA-B0-5694-11	12.4663
TCGA-B0-5695-01	13.1969
TCGA-B0-5696-01	13.3464
TCGA-B0-5696-11	10.9571
TCGA-B0-5697-01	15.2103
TCGA-B0-5697-11	9.72792
TCGA-B0-5698-01	15.0228
TCGA-B0-5699-01	13.7901
TCGA-B0-5699-11	10.3619
TCGA-B0-5700-01	13.1111
TCGA-B0-5701-01	13.4708
TCGA-B0-5701-11	12.8416
TCGA-B0-5702-01	14.0192
TCGA-B0-5703-01	12.4086
TCGA-B0-5703-11	10.5641
TCGA-B0-5705-01	14.1446
TCGA-B0-5705-11	11.3696
TCGA-B0-5706-01	12.764
TCGA-B0-5706-11	9.97871
TCGA-B0-5707-01	13.1788
TCGA-B0-5709-01	15.3245
TCGA-B0-5709-11	11.6096
TCGA-B0-5710-01	13.384
TCGA-B0-5711-01	13.8083
TCGA-B0-5711-11	11.1338
TCGA-B0-5712-01	12.8453
TCGA-B0-5712-11	12.8285
TCGA-B0-5713-01	13.4881
TCGA-B0-5812-01	13.9485
TCGA-B2-3923-01	11.6869
TCGA-B2-3923-01_Rep272	10.3542
TCGA-B2-3923-01_Rep358	10.6883
TCGA-B2-3924-01	12.3185
TCGA-B2-3924-01_Rep331	15.0178
TCGA-B2-3924-01_Rep373	12.9217
TCGA-B2-4098-01	13.8682
TCGA-B2-4099-01	14.435
TCGA-B2-4101-01	13.9444
TCGA-B2-4102-01	14.5478
TCGA-B2-5633-01	12.9453
TCGA-B2-5633-01_Rep313	12.187
TCGA-B2-5633-01_Rep94	14.1933
TCGA-B2-5635-01	14.7709
TCGA-B2-5635-01_Rep482	13.4323
TCGA-B2-5635-01_Rep526	13.0866
TCGA-B2-5636-01	13.325
TCGA-B2-5636-11	11.9851
TCGA-B2-5639-01	13.5651
TCGA-B2-5641-01	15.3679
TCGA-B2-5641-11	10.2819
TCGA-B2-A4SR-01	13.5401
TCGA-B4-5377-01	14.5846
TCGA-B4-5378-01	13.2572
TCGA-B4-5832-01	13.7378
TCGA-B4-5834-01	13.5948
TCGA-B4-5835-01	14.3708
TCGA-B4-5836-01	13.9047
TCGA-B4-5838-01	13.426
TCGA-B4-5843-01	13.4351
TCGA-B4-5844-01	12.9121
TCGA-B8-4143-01	14.1857
TCGA-B8-4146-01	14.1155
TCGA-B8-4148-01	14.5063
TCGA-B8-4151-01	13.118
TCGA-B8-4153-01	12.7609
TCGA-B8-4154-01	14.0333
TCGA-B8-4619-01	11.3365
TCGA-B8-4619-11	11.526
TCGA-B8-4620-01	14.2666
TCGA-B8-4620-11	12.9465
TCGA-B8-4621-01	14.6806
TCGA-B8-4622-01	14.3248
TCGA-B8-4622-11	13.2647
TCGA-B8-5158-01	15.0298
TCGA-B8-5159-01	14.0611
TCGA-B8-5162-01	16.1208
TCGA-B8-5163-01	15.9183
TCGA-B8-5164-01	15.9396
TCGA-B8-5165-01	13.725
TCGA-B8-5545-01	14.5801
TCGA-B8-5546-01	11.1163
TCGA-B8-5549-01	14.2257
TCGA-B8-5549-11	10.5068
TCGA-B8-5550-01	14.1773
TCGA-B8-5551-01	15.9576
TCGA-B8-5552-01	14.666
TCGA-B8-5552-11	13.5509
TCGA-B8-5553-01	14.8189
TCGA-B8-A54D-01	13.6629
TCGA-B8-A54E-01	12.3075
TCGA-B8-A54F-01	13.1347
TCGA-B8-A54G-01	15.4484
TCGA-B8-A54H-01	13.9304
TCGA-B8-A54I-01	14.5897
TCGA-B8-A54J-01	13.4863
TCGA-B8-A54K-01	11.4671
TCGA-B8-A7U6-01	13.5008
TCGA-B8-A8YJ-01	14.4439
TCGA-BP-4158-01	13.0517
TCGA-BP-4159-01	13.5895
TCGA-BP-4160-01	14.4552
TCGA-BP-4161-01	14.757
TCGA-BP-4162-01	14.3131
TCGA-BP-4163-01	14.1064
TCGA-BP-4164-01	12.5457
TCGA-BP-4165-01	12.9022
TCGA-BP-4166-01	13.7078
TCGA-BP-4167-01	15.3264
TCGA-BP-4169-01	14.8452
TCGA-BP-4170-01	14.7788
TCGA-BP-4173-01	15.9186
TCGA-BP-4174-01	14.4729
TCGA-BP-4176-01	15.1872
TCGA-BP-4177-01	12.6152
TCGA-BP-4325-01	14.1427
TCGA-BP-4326-01	13.3624
TCGA-BP-4327-01	13.0179
TCGA-BP-4329-01	14.3455
TCGA-BP-4330-01	14.697
TCGA-BP-4331-01	14.7822
TCGA-BP-4332-01	13.6125
TCGA-BP-4334-01	11.4226
TCGA-BP-4335-01	12.9766
TCGA-BP-4337-01	13.568
TCGA-BP-4338-01	14.7492
TCGA-BP-4340-01	12.8325
TCGA-BP-4341-01	12.7597
TCGA-BP-4342-01	13.8584
TCGA-BP-4343-01	15.2252
TCGA-BP-4344-01	13.7384
TCGA-BP-4345-01	14.6238
TCGA-BP-4346-01	14.6928
TCGA-BP-4347-01	13.5258
TCGA-BP-4349-01	13.2405
TCGA-BP-4351-01	13.1499
TCGA-BP-4352-01	12.188
TCGA-BP-4353-01	15.0823
TCGA-BP-4354-01	15.5594
TCGA-BP-4355-01	12.7486
TCGA-BP-4756-01	13.2435
TCGA-BP-4758-01	14.5919
TCGA-BP-4759-01	13.5447
TCGA-BP-4760-01	13.5038
TCGA-BP-4761-01	13.881
TCGA-BP-4762-01	14.504
TCGA-BP-4763-01	13.5527
TCGA-BP-4765-01	13.5868
TCGA-BP-4766-01	14.2676
TCGA-BP-4768-01	13.5898
TCGA-BP-4769-01	12.1898
TCGA-BP-4770-01	14.7863
TCGA-BP-4771-01	15.4383
TCGA-BP-4774-01	13.2581
TCGA-BP-4775-01	13.5451
TCGA-BP-4776-01	12.994
TCGA-BP-4777-01	15.1874
TCGA-BP-4781-01	14.3232
TCGA-BP-4782-01	14.6422
TCGA-BP-4784-01	13.1333
TCGA-BP-4787-01	14.7744
TCGA-BP-4789-01	13.2556
TCGA-BP-4790-01	14.5777
TCGA-BP-4795-01	13.8906
TCGA-BP-4797-01	15.0342
TCGA-BP-4798-01	15.8003
TCGA-BP-4799-01	13.3095
TCGA-BP-4801-01	14.8575
TCGA-BP-4803-01	13.8174
TCGA-BP-4804-01	14.5223
TCGA-BP-4807-01	14.2577
TCGA-BP-4959-01	15.4303
TCGA-BP-4960-01	14.4121
TCGA-BP-4961-01	14.0843
TCGA-BP-4962-01	15.2699
TCGA-BP-4963-01	14.6835
TCGA-BP-4964-01	14.1956
TCGA-BP-4965-01	14.5825
TCGA-BP-4967-01	13.6621
TCGA-BP-4968-01	14.4651
TCGA-BP-4969-01	11.9819
TCGA-BP-4970-01	15.4091
TCGA-BP-4971-01	14.6261
TCGA-BP-4972-01	15.7239
TCGA-BP-4973-01	14.3744
TCGA-BP-4974-01	13.581
TCGA-BP-4975-01	14.5545
TCGA-BP-4976-01	14.0847
TCGA-BP-4977-01	14.3769
TCGA-BP-4981-01	13.6629
TCGA-BP-4982-01	14.5798
TCGA-BP-4983-01	15.567
TCGA-BP-4985-01	13.6422
TCGA-BP-4986-01	14.6624
TCGA-BP-4987-01	13.7645
TCGA-BP-4989-01	15.4853
TCGA-BP-4991-01	14.0734
TCGA-BP-4992-01	13.7663
TCGA-BP-4993-01	13.8508
TCGA-BP-4994-01	13.561
TCGA-BP-4995-01	14.0308
TCGA-BP-4998-01	15.0009
TCGA-BP-4999-01	13.7801
TCGA-BP-5000-01	14.3516
TCGA-BP-5001-01	12.8519
TCGA-BP-5004-01	14.3493
TCGA-BP-5006-01	13.9157
TCGA-BP-5007-01	13.729
TCGA-BP-5008-01	14.5425
TCGA-BP-5009-01	14.847
TCGA-BP-5010-01	13.3529
TCGA-BP-5168-01	13.2104
TCGA-BP-5169-01	14.0688
TCGA-BP-5170-01	14.2423
TCGA-BP-5173-01	14.0582
TCGA-BP-5174-01	13.7061
TCGA-BP-5175-01	13.4102
TCGA-BP-5176-01	13.6979
TCGA-BP-5177-01	12.5038
TCGA-BP-5178-01	15.5312
TCGA-BP-5180-01	14.8014
TCGA-BP-5181-01	13.5074
TCGA-BP-5182-01	15.6403
TCGA-BP-5183-01	14.1763
TCGA-BP-5184-01	13.7967
TCGA-BP-5185-01	12.4486
TCGA-BP-5186-01	13.4165
TCGA-BP-5187-01	12.8521
TCGA-BP-5189-01	15.4127
TCGA-BP-5190-01	13.2556
TCGA-BP-5191-01	14.9805
TCGA-BP-5192-01	12.3987
TCGA-BP-5194-01	14.3125
TCGA-BP-5195-01	14.5896
TCGA-BP-5196-01	14.1364
TCGA-BP-5198-01	15.3451
TCGA-BP-5199-01	15.0212
TCGA-BP-5200-01	14.7538
TCGA-BP-5201-01	14.3014
TCGA-BP-5202-01	13.9184
TCGA-CJ-4634-01	13.6942
TCGA-CJ-4635-01	14.0552
TCGA-CJ-4636-01	14.8672
TCGA-CJ-4637-01	15.5868
TCGA-CJ-4638-01	11.8218
TCGA-CJ-4639-01	12.9796
TCGA-CJ-4640-01	14.9873
TCGA-CJ-4641-01	15.2679
TCGA-CJ-4642-01	9.43254
TCGA-CJ-4643-01	14.1278
TCGA-CJ-4644-01	14.4509
TCGA-CJ-4868-01	14.5481
TCGA-CJ-4869-01	15.4826
TCGA-CJ-4870-01	13.5453
TCGA-CJ-4871-01	13.8848
TCGA-CJ-4872-01	14.3626
TCGA-CJ-4873-01	15.0863
TCGA-CJ-4874-01	14.3292
TCGA-CJ-4875-01	13.7288
TCGA-CJ-4876-01	12.7591
TCGA-CJ-4878-01	12.365
TCGA-CJ-4881-01	14.5764
TCGA-CJ-4882-01	14.0571
TCGA-CJ-4884-01	14.7689
TCGA-CJ-4885-01	13.7245
TCGA-CJ-4886-01	13.9798
TCGA-CJ-4887-01	14.854
TCGA-CJ-4888-01	15.7094
TCGA-CJ-4889-01	14.8054
TCGA-CJ-4890-01	16.3043
TCGA-CJ-4891-01	14.6877
TCGA-CJ-4892-01	14.1111
TCGA-CJ-4893-01	14.5081
TCGA-CJ-4894-01	14.4506
TCGA-CJ-4895-01	14.5119
TCGA-CJ-4897-01	14.1449
TCGA-CJ-4899-01	14.5267
TCGA-CJ-4900-01	14.8839
TCGA-CJ-4901-01	15.1321
TCGA-CJ-4902-01	15.0288
TCGA-CJ-4903-01	14.514
TCGA-CJ-4904-01	14.4888
TCGA-CJ-4905-01	13.7541
TCGA-CJ-4907-01	14.1278
TCGA-CJ-4908-01	14.1464
TCGA-CJ-4912-01	13.0225
TCGA-CJ-4916-01	15.1939
TCGA-CJ-4918-01	14.4082
TCGA-CJ-4920-01	13.6148
TCGA-CJ-5671-01	15.3472
TCGA-CJ-5672-01	14.5459
TCGA-CJ-5672-11	10.3923
TCGA-CJ-5675-01	15.4639
TCGA-CJ-5676-01	14.4808
TCGA-CJ-5676-11	12.7553
TCGA-CJ-5677-01	14.5773
TCGA-CJ-5677-11	11.0154
TCGA-CJ-5678-01	14.2636
TCGA-CJ-5678-11	11.7296
TCGA-CJ-5679-01	12.3351
TCGA-CJ-5679-11	12.245
TCGA-CJ-5680-01	13.9469
TCGA-CJ-5680-11	12.1991
TCGA-CJ-5681-01	12.6815
TCGA-CJ-5681-11	10.5401
TCGA-CJ-5682-01	13.1884
TCGA-CJ-5683-01	13.5158
TCGA-CJ-5684-01	14.0675
TCGA-CJ-5686-01	14.8592
TCGA-CJ-5689-01	14.4167
TCGA-CJ-5689-11	12.0035
TCGA-CJ-6027-01	15.2929
TCGA-CJ-6028-01	14.6516
TCGA-CJ-6030-01	15.6627
TCGA-CJ-6030-11	12.2715
TCGA-CJ-6031-01	15.1765
TCGA-CJ-6032-01	13.7137
TCGA-CJ-6033-01	14.2919
TCGA-CJ-6033-11	11.1662
TCGA-CW-5580-01	14.5784
TCGA-CW-5580-11	11.7524
TCGA-CW-5581-01	13.2786
TCGA-CW-5581-11	10.1331
TCGA-CW-5583-01	12.9669
TCGA-CW-5584-01	14.3194
TCGA-CW-5584-11	12.8236
TCGA-CW-5585-01	12.5675
TCGA-CW-5585-11	11.3993
TCGA-CW-5587-01	15.2202
TCGA-CW-5587-11	11.1948
TCGA-CW-5588-01	14.801
TCGA-CW-5589-01	14.2379
TCGA-CW-5589-11	11.2877
TCGA-CW-5590-01	14.0459
TCGA-CW-5591-01	12.5892
TCGA-CW-5591-11	14.4323
TCGA-CW-6087-01	16.9997
TCGA-CW-6087-11	11.1066
TCGA-CW-6088-01	13.4699
TCGA-CW-6088-11	10.1548
TCGA-CW-6090-01	15.2713
TCGA-CW-6090-11	10.2348
TCGA-CW-6093-01	13.3541
TCGA-CW-6097-01	14.9633
TCGA-CZ-4853-01	13.7545
TCGA-CZ-4854-01	13.7461
TCGA-CZ-4856-01	14.6194
TCGA-CZ-4857-01	14.1369
TCGA-CZ-4858-01	14.3996
TCGA-CZ-4859-01	13.1607
TCGA-CZ-4860-01	14.6714
TCGA-CZ-4861-01	16.1344
TCGA-CZ-4862-01	14.3511
TCGA-CZ-4863-01	15.0225
TCGA-CZ-4863-11	11.0828
TCGA-CZ-4864-01	15.5653
TCGA-CZ-4864-11	12.0251
TCGA-CZ-4865-01	15.13
TCGA-CZ-4865-11	11.4599
TCGA-CZ-4866-01	15.1333
TCGA-CZ-5451-01	13.3919
TCGA-CZ-5451-11	11.0478
TCGA-CZ-5452-01	15.2903
TCGA-CZ-5452-11	9.80574
TCGA-CZ-5453-01	12.9065
TCGA-CZ-5453-11	11.5028
TCGA-CZ-5454-01	16.23
TCGA-CZ-5454-11	11.1039
TCGA-CZ-5455-01	15.7054
TCGA-CZ-5455-11	10.9233
TCGA-CZ-5456-01	14.9216
TCGA-CZ-5456-11	9.89785
TCGA-CZ-5457-01	14.5593
TCGA-CZ-5457-11	12.1154
TCGA-CZ-5458-01	14.497
TCGA-CZ-5458-11	10.0265
TCGA-CZ-5459-01	13.4974
TCGA-CZ-5460-01	14.524
TCGA-CZ-5461-01	14.7118
TCGA-CZ-5461-11	11.8293
TCGA-CZ-5462-01	14.2243
TCGA-CZ-5462-11	12.3904
TCGA-CZ-5463-01	14.5146
TCGA-CZ-5463-11	11.899
TCGA-CZ-5464-01	15.1188
TCGA-CZ-5465-01	13.6601
TCGA-CZ-5465-11	10.6193
TCGA-CZ-5466-01	14.7137
TCGA-CZ-5466-11	12.9819
TCGA-CZ-5467-01	13.903
TCGA-CZ-5467-11	11.268
TCGA-CZ-5468-01	14.1759
TCGA-CZ-5468-11	10.9622
TCGA-CZ-5469-01	14.1287
TCGA-CZ-5469-11	10.3955
TCGA-CZ-5470-01	15.244
TCGA-CZ-5470-11	12.0875
TCGA-CZ-5982-01	13.1082
TCGA-CZ-5982-11	9.97011
TCGA-CZ-5984-01	14.8337
TCGA-CZ-5984-11	11.2336
TCGA-CZ-5985-01	15.2249
TCGA-CZ-5985-11	9.68124
TCGA-CZ-5986-01	12.986
TCGA-CZ-5986-11	10.4553
TCGA-CZ-5987-01	13.9341
TCGA-CZ-5987-11	12.7723
TCGA-CZ-5988-01	13.0298
TCGA-CZ-5988-11	10.218
TCGA-CZ-5989-01	13.9347
TCGA-CZ-5989-11	12.1558
TCGA-DV-5565-01	13.7181
TCGA-DV-5566-01	13.145
TCGA-DV-5567-01	12.9887
TCGA-DV-5568-01	14.319
TCGA-DV-5569-01	14.4755
TCGA-DV-5573-01	14.9058
TCGA-DV-5574-01	15.4043
TCGA-DV-5575-01	13.9992
TCGA-DV-5576-01	12.0307
TCGA-DV-A4VX-01	13.2001
TCGA-DV-A4VZ-01	11.4215
TCGA-DV-A4W0-01	13.1082
TCGA-DV-A4W0-05	11.8876
TCGA-EU-5904-01	13.3451
TCGA-EU-5905-01	13.272
TCGA-EU-5906-01	14.7124
TCGA-EU-5907-01	12.5715
TCGA-G6-A5PC-01	13.8923
TCGA-G6-A8L6-01	13.6329
TCGA-G6-A8L7-01	12.1286
TCGA-G6-A8L8-01	11.6693
TCGA-GK-A6C7-01	13.6437
TCGA-MM-A563-01	14.3922
TCGA-MM-A564-01	12.5292
TCGA-MM-A84U-01	13.665
TCGA-MW-A4EC-01	13.1243
TCGA-T7-A92I-01	12.9982

## Sheet: Sheet2
Tag	ENSG00000162511	Tag	ENSG00000162511
TCGA-A3-3358-01	15.1869	TCGA-A3-3358-11	11.0091
TCGA-A3-3387-01	15.2613	TCGA-A3-3387-11	11.0941
TCGA-B0-4700-01	14.9258	TCGA-B0-4700-11	10.6627
TCGA-B0-4712-01	15.0218	TCGA-B0-4712-11	10.1254
TCGA-B0-5402-01	13.5283	TCGA-B0-5402-11	12.9586
TCGA-B0-5690-01	13.5542	TCGA-B0-5690-11	10.4409
TCGA-B0-5691-01	13.0901	TCGA-B0-5691-11	13.0798
TCGA-B0-5694-01	13.3692	TCGA-B0-5694-11	12.4663
TCGA-B0-5696-01	13.3464	TCGA-B0-5696-11	10.9571
TCGA-B0-5697-01	15.2103	TCGA-B0-5697-11	9.72792
TCGA-B0-5699-01	13.7901	TCGA-B0-5699-11	10.3619
TCGA-B0-5701-01	13.4708	TCGA-B0-5701-11	12.8416
TCGA-B0-5703-01	12.4086	TCGA-B0-5703-11	10.5641
TCGA-B0-5705-01	14.1446	TCGA-B0-5705-11	11.3696
TCGA-B0-5706-01	12.764	TCGA-B0-5706-11	9.97871
TCGA-B0-5709-01	15.3245	TCGA-B0-5709-11	11.6096
TCGA-B0-5711-01	13.8083	TCGA-B0-5711-11	11.1338
TCGA-B0-5712-01	12.8453	TCGA-B0-5712-11	12.8285
TCGA-B2-5636-01	13.325	TCGA-B2-5636-11	11.9851
TCGA-B2-5641-01	15.3679	TCGA-B2-5641-11	10.2819
TCGA-B8-4619-01	11.3365	TCGA-B8-4619-11	11.526
TCGA-B8-4620-01	14.2666	TCGA-B8-4620-11	12.9465
TCGA-B8-4622-01	14.3248	TCGA-B8-4622-11	13.2647
TCGA-B8-5549-01	14.2257	TCGA-B8-5549-11	10.5068
TCGA-B8-5552-01	14.666	TCGA-B8-5552-11	13.5509
TCGA-CJ-5672-01	14.5459	TCGA-CJ-5672-11	10.3923
TCGA-CJ-5676-01	14.4808	TCGA-CJ-5676-11	12.7553
TCGA-CJ-5677-01	14.5773	TCGA-CJ-5677-11	11.0154
TCGA-CJ-5678-01	14.2636	TCGA-CJ-5678-11	11.7296
TCGA-CJ-5679-01	12.3351	TCGA-CJ-5679-11	12.245
TCGA-CJ-5679-11	12.245	TCGA-CJ-5680-11	12.1991
TCGA-CJ-5681-01	12.6815	TCGA-CJ-5681-11	10.5401
TCGA-CJ-5689-01	14.4167	TCGA-CJ-5689-11	12.0035
TCGA-CJ-6030-01	15.6627	TCGA-CJ-6030-11	12.2715
TCGA-CJ-6033-01	14.2919	TCGA-CJ-6033-11	11.1662
TCGA-CW-5580-01	14.5784	TCGA-CW-5580-11	11.7524
TCGA-CW-5581-01	13.2786	TCGA-CW-5581-11	10.1331
TCGA-CW-5584-01	14.3194	TCGA-CW-5584-11	12.8236
TCGA-CW-5585-01	12.5675	TCGA-CW-5585-11	11.3993
TCGA-CW-5587-01	15.2202	TCGA-CW-5587-11	11.1948
TCGA-CW-5589-01	14.2379	TCGA-CW-5589-11	11.2877
TCGA-CW-5591-01	12.5892	TCGA-CW-5591-11	14.4323
TCGA-CW-6087-01	16.9997	TCGA-CW-6087-11	11.1066
TCGA-CW-6088-01	13.4699	TCGA-CW-6088-11	10.1548
TCGA-CW-6090-01	15.2713	TCGA-CW-6090-11	10.2348
TCGA-CZ-4863-01	15.0225	TCGA-CZ-4863-11	11.0828
TCGA-CZ-4864-01	15.5653	TCGA-CZ-4864-11	12.0251
TCGA-CZ-4865-01	15.13	TCGA-CZ-4865-11	11.4599
TCGA-CZ-5451-01	13.3919	TCGA-CZ-5451-11	11.0478
TCGA-CZ-5452-01	15.2903	TCGA-CZ-5452-11	9.80574
TCGA-CZ-5453-01	12.9065	TCGA-CZ-5453-11	11.5028
TCGA-CZ-5454-01	16.23	TCGA-CZ-5454-11	11.1039
TCGA-CZ-5455-01	15.7054	TCGA-CZ-5455-11	10.9233
TCGA-CZ-5456-01	14.9216	TCGA-CZ-5456-11	9.89785
TCGA-CZ-5457-01	14.5593	TCGA-CZ-5457-11	12.1154
TCGA-CZ-5458-01	14.497	TCGA-CZ-5458-11	10.0265
TCGA-CZ-5461-01	14.7118	TCGA-CZ-5461-11	11.8293
TCGA-CZ-5462-01	14.2243	TCGA-CZ-5462-11	12.3904
TCGA-CZ-5463-01	14.5146	TCGA-CZ-5463-11	11.899
TCGA-CZ-5465-01	13.6601	TCGA-CZ-5465-11	10.6193
TCGA-CZ-5466-01	14.7137	TCGA-CZ-5466-11	12.9819
TCGA-CZ-5467-01	13.903	TCGA-CZ-5467-11	11.268
TCGA-CZ-5468-01	14.1759	TCGA-CZ-5468-11	10.9622
TCGA-CZ-5469-01	14.1287	TCGA-CZ-5469-11	10.3955
TCGA-CZ-5470-01	15.244	TCGA-CZ-5470-11	12.0875
TCGA-CZ-5982-01	13.1082	TCGA-CZ-5982-11	9.97011
TCGA-CZ-5984-01	14.8337	TCGA-CZ-5984-11	11.2336
TCGA-CZ-5985-01	15.2249	TCGA-CZ-5985-11	9.68124
TCGA-CZ-5986-01	12.986	TCGA-CZ-5986-11	10.4553
TCGA-CZ-5987-01	13.9341	TCGA-CZ-5987-11	12.7723
TCGA-CZ-5988-01	13.0298	TCGA-CZ-5988-11	10.218
TCGA-CZ-5989-01	13.9347	TCGA-CZ-5989-11	12.1558
