# Supplementary material for: Prediction and analysis of novel key genes ITGAX, LAPTM5, SERPINE1 in clear cell renal cell carcinoma through bioinformatics analysis
Source: PeerJ. 2021 Apr 20;9:e11272. doi: 10.7717/peerj.11272 (PMC8063882; doi:10.7717/peerj.11272)
Supplement: Supplemental Information 16 [file peerj-09-11272-s016.xlsx]

## Sheet: SERPINE1-TCGA_Exp_convertlog
Tag	ENSG00000106366
TCGA-A3-3308-01	12.2125
TCGA-CJ-5672-01	13.0746
TCGA-CJ-5680-01	11.617
TCGA-CZ-5465-01	13.4172
TCGA-B0-5096-01	14.7379
TCGA-B8-4153-01	12.2279
TCGA-BP-4964-01	13.3902
TCGA-A3-3324-01	13.9378
TCGA-CJ-4644-01	11.9226
TCGA-B0-5088-01	15.0559
TCGA-BP-4169-01	15.44
TCGA-BP-4177-01	13.6855
TCGA-AK-3428-01	13.6951
TCGA-CJ-5689-01	14.3511
TCGA-CJ-4634-01	14.0581
TCGA-BP-4774-01	14.0276
TCGA-CZ-4856-01	12.3278
TCGA-BP-4959-01	13.8583
TCGA-B0-5100-01	13.2783
TCGA-CJ-4872-01	14.0371
TCGA-CZ-4854-01	13.7286
TCGA-BP-4768-01	12.2886
TCGA-CZ-5982-01	13.3622
TCGA-BP-4174-01	14.2843
TCGA-BP-4325-01	11.1176
TCGA-BP-4801-01	12.9867
TCGA-MM-A563-01	13.9102
TCGA-BP-4331-01	13.9126
TCGA-B0-5697-01	11.8599
TCGA-B0-4839-01	12.8289
TCGA-CJ-4889-01	13.4594
TCGA-B4-5836-01	12.8158
TCGA-B8-4620-01	15.8729
TCGA-MM-A84U-01	11.6443
TCGA-CJ-5686-01	14.2033
TCGA-CW-5585-01	13.4303
TCGA-B2-4101-01	13.6137
TCGA-BP-4962-01	13.7535
TCGA-CZ-5460-01	13.7782
TCGA-CZ-5459-01	13.0324
TCGA-BP-5168-01	14.7745
TCGA-BP-4781-01	14.4121
TCGA-B8-5553-01	13.0995
TCGA-B0-4945-01	13.224
TCGA-CJ-4905-01	13.1534
TCGA-BP-5178-01	16.6139
TCGA-BP-4799-01	16.9887
TCGA-B0-4691-01	13.8668
TCGA-CW-5588-01	13.6783
TCGA-B8-5164-01	11.0914
TCGA-BP-4798-01	12.224
TCGA-BP-4970-01	13.5558
TCGA-CJ-4876-01	14.5372
TCGA-CJ-4871-01	14.8971
TCGA-B0-5690-01	12.6983
TCGA-CJ-4900-01	15.0536
TCGA-BP-4967-01	16.1507
TCGA-MW-A4EC-01	11.5831
TCGA-B0-5115-01	13.8676
TCGA-BP-4961-01	15.2982
TCGA-CZ-5451-01	13.5244
TCGA-A3-3378-01	12.7149
TCGA-B0-5080-01	14.9997
TCGA-CZ-5461-01	13.2608
TCGA-CW-6087-01	15.0959
TCGA-B0-4690-01	17.2366
TCGA-BP-4986-01	17.5319
TCGA-CJ-4870-01	13.4193
TCGA-CJ-6031-01	13.6702
TCGA-B0-5097-01	16.8526
TCGA-B4-5844-01	13.3625
TCGA-BP-4337-01	13.4954
TCGA-BP-4782-01	13.5338
TCGA-A3-3313-01	11.3487
TCGA-CJ-5677-01	11.4752
TCGA-A3-3385-01	9.76321
TCGA-B2-5633-01	11.3337
TCGA-BP-4989-01	13.8374
TCGA-AK-3447-01	6.65821
TCGA-CZ-5452-01	11.933
TCGA-BP-5175-01	13.7814
TCGA-B0-4833-01	11.5684
TCGA-B4-5377-01	14.0451
TCGA-CJ-5676-01	14.916
TCGA-CZ-4866-01	10.9129
TCGA-BP-5200-01	16.3849
TCGA-AK-3427-01	9.10591
TCGA-B0-5109-01	14.4265
TCGA-B0-5701-01	12.3168
TCGA-BP-4803-01	14.1485
TCGA-BP-4993-01	15.1657
TCGA-CJ-6028-01	15.8245
TCGA-CJ-4643-01	12.3829
TCGA-B8-A54D-01	11.4762
TCGA-B2-5633-01_Rep94	12.0577
TCGA-BP-4166-01	13.9252
TCGA-B0-5121-01	12.8068
TCGA-CJ-4639-01	11.9546
TCGA-B0-5711-01	13.4146
TCGA-DV-5569-01	13.9402
TCGA-BP-4759-01	13.655
TCGA-B2-3923-01	8.85175
TCGA-BP-5196-01	14.5434
TCGA-B0-5081-01	14.7652
TCGA-B0-5693-01	14.2742
TCGA-AK-3451-01	10.014
TCGA-AK-3440-01	11.8313
TCGA-B0-4852-01	13.7193
TCGA-BP-5174-01	10.8727
TCGA-BP-5173-01	13.0956
TCGA-A3-3316-01	15.3626
TCGA-BP-4173-01	15.3947
TCGA-B0-4842-01	10.3815
TCGA-B4-5832-01	11.2871
TCGA-A3-A6NI-01	12.8433
TCGA-BP-5169-01	15.7469
TCGA-DV-A4VX-01	11.3382
TCGA-G6-A8L6-01	12.2912
TCGA-B0-5399-01	11.9989
TCGA-BP-4338-01	17.1973
TCGA-BP-4353-01	15.3707
TCGA-A3-3370-01	13.2439
TCGA-BP-4968-01	14.6004
TCGA-CJ-4890-01	14.7265
TCGA-BP-5004-01	15.8408
TCGA-BP-4975-01	13.7638
TCGA-A3-3372-01	13.1124
TCGA-CJ-4869-01	14.2836
TCGA-CJ-4920-01	15.0761
TCGA-BP-4766-01	13.246
TCGA-GK-A6C7-01	13.665
TCGA-B0-4819-01	13.6708
TCGA-DV-A4W0-01	15.7198
TCGA-BP-5192-01	11.3482
TCGA-DV-5566-01	12.4653
TCGA-BP-4326-01	17.527
TCGA-B2-5636-01	11.5343
TCGA-DV-5573-01	12.7632
TCGA-CW-5584-01	13.9158
TCGA-BP-4352-01	14.9665
TCGA-B0-4706-01	12.0417
TCGA-A3-A8OW-01	13.243
TCGA-CJ-4893-01	12.1655
TCGA-B0-5705-01	10.4062
TCGA-CJ-4642-01	9.10329
TCGA-DV-5575-01	14.7676
TCGA-BP-4977-01	13.213
TCGA-CZ-5988-01	15.1643
TCGA-CJ-6027-01	16.7815
TCGA-A3-3311-01	11.0748
TCGA-CZ-5456-01	17.5953
TCGA-BP-5177-01	12.9839
TCGA-A3-3343-01	13.4358
TCGA-B0-4816-01	13.5461
TCGA-BP-5180-01	14.5275
TCGA-B4-5843-01	13.8628
TCGA-BP-4804-01	14.4404
TCGA-AK-3426-01	14.1644
TCGA-BP-4982-01	14.6659
TCGA-B8-5552-01	12.2497
TCGA-CJ-5671-01	15.7241
TCGA-B0-5702-01	10.6402
TCGA-B0-5700-01	14.226
TCGA-B2-5639-01	9.81858
TCGA-CW-5591-01	11.196
TCGA-B0-4821-01	15.668
TCGA-AK-3465-01	11.1855
TCGA-CZ-4860-01	19.3904
TCGA-B4-5834-01	15.0607
TCGA-CZ-4864-01	13.2142
TCGA-CJ-5675-01	10.3129
TCGA-CW-6097-01	13.0923
TCGA-A3-3331-01	12.8971
TCGA-CZ-5987-01	13.3526
TCGA-A3-3359-01	12.0175
TCGA-CJ-5682-01	12.1991
TCGA-B0-5402-01	15.3032
TCGA-BP-4343-01	15.492
TCGA-CZ-4865-01	13.3519
TCGA-EU-5904-01	16.3494
TCGA-A3-3358-01	13.2012
TCGA-A3-A8CQ-01	13.1881
TCGA-A3-3325-01	13.6895
TCGA-CJ-4886-01	13.7769
TCGA-B4-5838-01	13.0009
TCGA-BP-4332-01	12.3829
TCGA-A3-A8OV-01	10.1812
TCGA-CZ-5468-01	17.7349
TCGA-B0-4846-01	11.69
TCGA-B0-5400-01	13.8102
TCGA-BP-4762-01	12.3869
TCGA-BP-4758-01	14.2351
TCGA-B0-5085-01	12.8961
TCGA-CW-6088-01	12.2952
TCGA-CJ-4912-01	16.9607
TCGA-B0-4836-01	16.4504
TCGA-A3-3374-01	12.2189
TCGA-AK-3450-01	12.9652
TCGA-B0-4701-01	13.2442
TCGA-BP-4985-01	14.1435
TCGA-BP-4790-01	13.0624
TCGA-A3-3376-01	12.556
TCGA-B0-4813-01	16.2877
TCGA-B8-4143-01	12.9998
TCGA-A3-3363-01	8.97441
TCGA-B0-4838-01	12.0307
TCGA-B0-5699-01	12.0875
TCGA-6D-AA2E-01	12.1023
TCGA-G6-A5PC-01	9.94691
TCGA-AK-3429-01	10.7855
TCGA-B0-4817-01	12.0851
TCGA-CZ-5470-01	12.0701
TCGA-A3-A8OU-01	12.6551
TCGA-B0-5706-01	13.9935
TCGA-CJ-5679-01	13.5059
TCGA-CZ-4853-01	12.3509
TCGA-A3-3307-01	12.3509
TCGA-A3-A6NL-01	12.6287
TCGA-A3-3387-01	13.6241
TCGA-CJ-4888-01	14.1074
TCGA-B0-4834-01	11.8262
TCGA-B0-4811-01	11.9311
TCGA-BP-4965-01	13.4058
TCGA-BP-4340-01	13.0324
TCGA-B0-5108-01	17.0201
TCGA-CZ-5455-01	13.6844
TCGA-B0-5102-01	12.9317
TCGA-B2-4098-01	11.4727
TCGA-B0-4697-01	11.5675
TCGA-AK-3433-01	8.32193
TCGA-CJ-4874-01	12.5948
TCGA-DV-5576-01	13.4477
TCGA-B8-5159-01	12.4099
TCGA-B0-4700-01	16.0967
TCGA-T7-A92I-01	10.7616
TCGA-B0-5709-01	12.8798
TCGA-B8-5163-01	15.3208
TCGA-BP-4170-01	13.605
TCGA-DV-5567-01	14.5316
TCGA-CJ-4637-01	12.3993
TCGA-B0-4688-01	17.0426
TCGA-B2-5635-01	12.7453
TCGA-BP-4960-01	16.6935
TCGA-BP-5001-01	11.8416
TCGA-BP-4164-01	13.0152
TCGA-BP-4763-01	13.3092
TCGA-AK-3460-01	13.1701
TCGA-BP-4335-01	13.1746
TCGA-BP-5010-01	13.0593
TCGA-CJ-4881-01	12.9837
TCGA-BP-4344-01	12.9001
TCGA-BP-4995-01	12.5231
TCGA-BP-4999-01	13.989
TCGA-BP-5000-01	14.3158
TCGA-A3-3382-01	14.4331
TCGA-CW-5581-01	12.4223
TCGA-AK-3456-01	10.9894
TCGA-BP-4776-01	13.4144
TCGA-B0-5703-01	12.2521
TCGA-BP-4334-01	9.86882
TCGA-A3-3367-01	12.7467
TCGA-BP-5176-01	11.8325
TCGA-BP-5201-01	14.4229
TCGA-CW-6090-01	16.0735
TCGA-CZ-4858-01	14.374
TCGA-CZ-5464-01	12.0307
TCGA-A3-3380-01	13.5888
TCGA-BP-4351-01	14.2728
TCGA-DV-5565-01	15.8342
TCGA-B8-A54F-01	13.8867
TCGA-BP-4167-01	14.2636
TCGA-EU-5906-01	13.9188
TCGA-B2-3923-01_Rep272	7.74819
TCGA-CW-5590-01	14.359
TCGA-B8-4146-01	11.168
TCGA-A3-3349-01	12.7311
TCGA-A3-3352-01	13.2763
TCGA-B0-4849-01	14.6007
TCGA-BP-4991-01	14.5035
TCGA-B0-5713-01	12.1335
TCGA-BP-5186-01	12.6893
TCGA-CJ-4885-01	13.0512
TCGA-G6-A8L8-01	12.8961
TCGA-B2-3924-01	9.86109
TCGA-CZ-5454-01	15.1384
TCGA-CJ-4873-01	11.1517
TCGA-B4-5835-01	10.8948
TCGA-BP-4973-01	14.0435
TCGA-B0-5812-01	14.1057
TCGA-CJ-4641-01	13.7016
TCGA-B0-5710-01	15.7162
TCGA-BP-4992-01	14.4265
TCGA-A3-A8OX-01	13.1977
TCGA-B0-5695-01	11.8467
TCGA-B0-5691-01	13.0133
TCGA-AK-3425-01	13.8871
TCGA-BP-4347-01	13.5566
TCGA-BP-4354-01	17.9966
TCGA-BP-4345-01	14.8607
TCGA-CJ-6032-01	12.991
TCGA-BP-4355-01	13.7367
TCGA-B8-5550-01	13.8104
TCGA-BP-4163-01	9.86109
TCGA-CZ-4863-01	11.7194
TCGA-BP-4971-01	12.9476
TCGA-BP-4327-01	14.4866
TCGA-A3-3323-01	13.1147
TCGA-CJ-4636-01	13.097
TCGA-BP-4974-01	15.2016
TCGA-B0-5098-01	13.1785
TCGA-B0-5707-01	10.6618
TCGA-A3-3335-01	16.0462
TCGA-CJ-4640-01	11.8849
TCGA-B2-5633-01_Rep313	11.4009
TCGA-G6-A8L7-01	10.9801
TCGA-B8-4622-01	12.6344
TCGA-B0-5094-01	15.0432
TCGA-CZ-5469-01	12.6497
TCGA-BP-4342-01	16.005
TCGA-B8-A54I-01	16.0713
TCGA-CJ-4884-01	13.2671
TCGA-BP-5181-01	13.2321
TCGA-A3-3362-01	11.6253
TCGA-B0-5712-01	12.6484
TCGA-A3-3373-01	13.7488
TCGA-A3-3365-01	13.896
TCGA-BP-4976-01	12.5539
TCGA-DV-5568-01	15.6503
TCGA-CZ-4859-01	12.3498
TCGA-BP-5183-01	10.2912
TCGA-BP-4761-01	14.7378
TCGA-B2-3924-01_Rep331	11.9473
TCGA-B8-5162-01	15.521
TCGA-BP-4771-01	12.9449
TCGA-CJ-4908-01	15.2962
TCGA-BP-5184-01	13.7441
TCGA-B0-4699-01	14.0457
TCGA-A3-A6NN-01	13.6808
TCGA-CJ-4868-01	17.0496
TCGA-B0-5075-01	10.6348
TCGA-A3-3306-01	12.1861
TCGA-B8-5546-01	8.56224
TCGA-BP-5202-01	13.9218
TCGA-BP-4981-01	12.5302
TCGA-B0-4693-01	13.2806
TCGA-B8-A7U6-01	16.0636
TCGA-BP-5194-01	13.1532
TCGA-A3-3320-01	13.9767
TCGA-BP-4341-01	13.7015
TCGA-BP-4969-01	11.9163
TCGA-B0-5116-01	12.1453
TCGA-B0-5692-01	12.129
TCGA-B0-4815-01	13.6652
TCGA-B0-4814-01	12.0821
TCGA-B0-4698-01	18.3877
TCGA-B8-A54G-01	11.4959
TCGA-BP-4760-01	13.6311
TCGA-CJ-4901-01	16.6543
TCGA-B2-3923-01_Rep358	8.50779
TCGA-CJ-4878-01	13.6638
TCGA-B0-4843-01	13.5094
TCGA-B0-4841-01	13.5535
TCGA-CJ-4891-01	13.8705
TCGA-CJ-4907-01	14.8283
TCGA-A3-3351-01	13.0283
TCGA-B0-5104-01	11.1799
TCGA-B0-5099-01	15.1771
TCGA-BP-4165-01	12.1128
TCGA-A3-3328-01	10.6421
TCGA-B8-A54K-01	11.7207
TCGA-BP-4987-01	11.592
TCGA-BP-5008-01	16.0907
TCGA-A3-3357-01	11.5411
TCGA-B2-3924-01_Rep373	10.5812
TCGA-BP-5198-01	17.3599
TCGA-B0-4810-01	13.826
TCGA-EU-5905-01	12.6106
TCGA-BP-4994-01	11.9318
TCGA-BP-5170-01	15.6073
TCGA-CW-5583-01	13.2549
TCGA-AS-3777-01	11.9658
TCGA-B0-4818-01	12.7731
TCGA-BP-4998-01	13.829
TCGA-CJ-4899-01	15.2129
TCGA-B2-4099-01	10.8711
TCGA-MM-A564-01	10.4315
TCGA-B0-5106-01	14.3755
TCGA-B8-5165-01	14.1994
TCGA-B0-5694-01	12.6298
TCGA-CJ-4897-01	12.9926
TCGA-B8-A8YJ-01	17.3404
TCGA-BP-4770-01	15.7145
TCGA-BP-4784-01	13.0493
TCGA-B0-5113-01	14.18
TCGA-CJ-4875-01	11.5689
TCGA-B0-5696-01	13.9429
TCGA-A3-3317-01	13.4769
TCGA-B0-5077-01	13.0793
TCGA-CW-6093-01	13.0942
TCGA-BP-4963-01	14.0383
TCGA-BP-4789-01	14.1829
TCGA-B0-4694-01	15.2613
TCGA-AK-3431-01	14.3108
TCGA-BP-5199-01	13.6604
TCGA-B0-5698-01	15.3205
TCGA-CW-5587-01	11.2923
TCGA-CJ-4638-01	8.79766
TCGA-B0-5083-01	12.2456
TCGA-CJ-4903-01	15.957
TCGA-BP-5185-01	11.9883
TCGA-CZ-5466-01	13.1607
TCGA-BP-5187-01	14.2163
TCGA-DV-5574-01	15.8362
TCGA-AK-3454-01	14.1057
TCGA-BP-4797-01	14.1529
TCGA-CJ-5681-01	11.8463
TCGA-BP-4983-01	15.8342
TCGA-BP-4349-01	14.1639
TCGA-B0-4710-01	12.7192
TCGA-A3-3319-01	15.0395
TCGA-B4-5378-01	15.8256
TCGA-BP-4329-01	11.7419
TCGA-B0-4713-01	11.6193
TCGA-AK-3434-01	13.5113
TCGA-AK-3455-01	11.796
TCGA-CZ-4861-01	15.1748
TCGA-BP-5006-01	14.6366
TCGA-CZ-5989-01	10.7887
TCGA-B8-4151-01	11.0532
TCGA-A3-3347-01	17.1406
TCGA-CJ-4918-01	14.6812
TCGA-BP-4162-01	14.1471
TCGA-CJ-4894-01	11.3788
TCGA-CJ-4892-01	12.7147
TCGA-3Z-A93Z-01	11.9484
TCGA-BP-5189-01	16.1399
TCGA-B8-4621-01	11.375
TCGA-B8-5551-01	13.7469
TCGA-BP-4330-01	12.2294
TCGA-B8-5545-01	13.3741
TCGA-CJ-4887-01	14.0141
TCGA-BP-4176-01	17.1253
TCGA-B0-4823-01	13.6121
TCGA-BP-4795-01	11.6764
TCGA-CJ-4895-01	13.5672
TCGA-AK-3445-01	15.4246
TCGA-B0-5120-01	14.5503
TCGA-CJ-4882-01	13.8087
TCGA-AK-3436-01	15.2457
TCGA-CW-5580-01	13.9432
TCGA-B8-4148-01	12.1202
TCGA-B8-4154-01	10.9418
TCGA-BP-4765-01	15.0963
TCGA-BP-4777-01	13.8757
TCGA-AS-3778-01	14.0069
TCGA-B0-5095-01	13.7504
TCGA-CZ-5985-01	13.3773
TCGA-BP-5195-01	15.353
TCGA-B0-5119-01	10.7305
TCGA-CZ-5458-01	12.5053
TCGA-B0-4822-01	15.2464
TCGA-CW-5589-01	13.2709
TCGA-BP-5182-01	13.9679
TCGA-A3-3326-01	11.0403
TCGA-AK-3443-01	9.85487
TCGA-BP-4972-01	13.8238
TCGA-BP-4775-01	14.3807
TCGA-B0-4847-01	9.9263
TCGA-AK-3453-01	9.66888
TCGA-BP-5190-01	11.4014
TCGA-B8-A54E-01	9.15228
TCGA-B8-A54H-01	11.4939
TCGA-B0-4707-01	15.0627
TCGA-B2-A4SR-01	13.1766
TCGA-B8-4619-01	13.1641
TCGA-B0-4828-01	11.9285
TCGA-B0-4827-01	13.7703
TCGA-BP-5191-01	12.263
TCGA-BP-4158-01	12.3753
TCGA-BP-5007-01	12.8467
TCGA-CZ-5463-01	14.2973
TCGA-B0-5092-01	13.2522
TCGA-B2-5635-01_Rep482	11.8533
TCGA-A3-3322-01	12.0081
TCGA-CJ-4916-01	13.1368
TCGA-AK-3458-01	11.3309
TCGA-A3-3329-01	13.1881
TCGA-A3-3383-01	11.3685
TCGA-CJ-4635-01	14.5949
TCGA-A3-A6NJ-01	13.5511
TCGA-B0-5084-01	12.9454
TCGA-BP-4769-01	12.5051
TCGA-BP-4160-01	13.9306
TCGA-B2-5641-01	11.7694
TCGA-BP-4161-01	13.4979
TCGA-CZ-5457-01	12.5618
TCGA-B0-4718-01	13.3274
TCGA-DV-A4VZ-01	11.2234
TCGA-B8-A54J-01	13.379
TCGA-BP-5009-01	13.9431
TCGA-CJ-5678-01	11.1561
TCGA-CZ-4857-01	13.3209
TCGA-CJ-6033-01	15.1579
TCGA-CZ-5984-01	13.875
TCGA-B0-5110-01	15.2434
TCGA-B0-4696-01	11.5382
TCGA-B0-4844-01	14.2549
TCGA-B0-4714-01	10.5206
TCGA-B0-5117-01	9.62388
TCGA-CZ-5467-01	16.2603
TCGA-CZ-5453-01	13.2059
TCGA-B0-4845-01	12.236
TCGA-BP-4807-01	13.509
TCGA-CZ-4862-01	12.5031
TCGA-BP-4346-01	11.8082
TCGA-B0-4712-01	18.0272
TCGA-CJ-4904-01	14.8424
TCGA-CZ-5986-01	14.8523
TCGA-A3-3346-01	17.5819
TCGA-CJ-5684-01	11.599
TCGA-CJ-4902-01	15.5602
TCGA-CJ-6030-01	14.1954
TCGA-B0-4703-01	15.2532
TCGA-B0-4837-01	14.5735
TCGA-AK-3461-01	13.7493
TCGA-BP-4159-01	13.0836
TCGA-B2-5635-01_Rep526	10.6821
TCGA-CJ-5683-01	12.7723
TCGA-BP-4756-01	10.2609
TCGA-EU-5907-01	13.4146
TCGA-B8-5549-01	13.5567
TCGA-BP-4787-01	15.6196
TCGA-B0-5107-01	7.59991
TCGA-CZ-5462-01	12.211
TCGA-B8-5158-01	16.1164
TCGA-B0-4848-01	12.0526
TCGA-B2-4102-01	9.87344
TCGA-B0-4824-01	10.5915
TCGA-DV-A4W0-05	11.7469
TCGA-CZ-5989-11	11.0775
TCGA-CZ-5987-11	13.4426
TCGA-CZ-5985-11	11.7826
TCGA-CZ-5455-11	13.9143
TCGA-CZ-5451-11	12.6434
TCGA-CZ-5984-11	12.1427
TCGA-B8-5552-11	13.5929
TCGA-CZ-5982-11	8.76155
TCGA-B0-5697-11	10.7574
TCGA-CJ-5678-11	9.60733
TCGA-CW-5584-11	10.4919
TCGA-CW-5587-11	8.52748
TCGA-CZ-4863-11	11.1235
TCGA-CZ-5988-11	10.2396
TCGA-CW-5589-11	10.7074
TCGA-CW-5585-11	12.314
TCGA-CJ-5689-11	11.9954
TCGA-B8-4622-11	10.9136
TCGA-B8-4620-11	13.8215
TCGA-B2-5636-11	9.40514
TCGA-B0-5699-11	11.3761
TCGA-CZ-5457-11	12.1
TCGA-CJ-5681-11	11.8025
TCGA-CZ-5462-11	8.77149
TCGA-B0-5694-11	11.9311
TCGA-CZ-5469-11	12.5331
TCGA-CJ-6033-11	8.37504
TCGA-CZ-5461-11	12.9376
TCGA-CW-6088-11	10.7117
TCGA-B8-5549-11	13.3737
TCGA-CW-6090-11	8.55459
TCGA-CW-6087-11	8.34873
TCGA-CW-5580-11	13.5591
TCGA-CZ-5466-11	12.3875
TCGA-B8-4619-11	11.4184
TCGA-B0-5705-11	11.1183
TCGA-CJ-5676-11	13.1877
TCGA-CZ-5452-11	11.9589
TCGA-CZ-5986-11	10.5584
TCGA-B0-5711-11	10.8842
TCGA-B0-4700-11	12.2776
TCGA-CZ-5456-11	11.8846
TCGA-CJ-5677-11	10.8918
TCGA-B0-5703-11	10.1712
TCGA-CW-5581-11	10.6573
TCGA-B0-5701-11	14.2011
TCGA-B0-5709-11	12.4354
TCGA-CZ-5453-11	13.0062
TCGA-CJ-5672-11	12.2243
TCGA-CZ-4865-11	11.3886
TCGA-CZ-5454-11	13.9314
TCGA-CZ-4864-11	12.6355
TCGA-CZ-5463-11	12.1963
TCGA-B0-5691-11	13.4242
TCGA-CW-5591-11	12.9256
TCGA-CZ-5470-11	11.0654
TCGA-B0-5696-11	9.74819
TCGA-A3-3387-11	11.0681
TCGA-B0-5712-11	13.0549
TCGA-A3-3358-11	9.90989
TCGA-B0-5402-11	13.9654
TCGA-B0-5690-11	7.56986
TCGA-CJ-5679-11	11.4818
TCGA-CZ-5465-11	10.8619
TCGA-B2-5641-11	8.14466
TCGA-CJ-5680-11	15.2425
TCGA-B0-5706-11	11.0901
TCGA-CZ-5458-11	13.3596
TCGA-CZ-5468-11	11.4548
TCGA-CZ-5467-11	14.9402
TCGA-B0-4712-11	8.98584
TCGA-CJ-6030-11	9.67596

## Sheet: Sheet1
Tag	ENSG00000106366				Tag	ENSG00000106366	Tag	ENSG00000106366
TCGA-3Z-A93Z-01	11.9484				TCGA-A3-3358-01	13.2012	TCGA-A3-3358-11	9.90989
TCGA-6D-AA2E-01	12.1023
TCGA-A3-3306-01	12.1861				TCGA-A3-3387-01	13.6241	TCGA-A3-3387-11	11.0681
TCGA-A3-3307-01	12.3509
TCGA-A3-3308-01	12.2125				TCGA-B0-4700-01	16.0967	TCGA-B0-4700-11	12.2776
TCGA-A3-3311-01	11.0748
TCGA-A3-3313-01	11.3487				TCGA-B0-4712-01	18.0272	TCGA-B0-4712-11	8.98584
TCGA-A3-3316-01	15.3626
TCGA-A3-3317-01	13.4769				TCGA-B0-5402-01	15.3032	TCGA-B0-5402-11	13.9654
TCGA-A3-3319-01	15.0395
TCGA-A3-3320-01	13.9767				TCGA-B0-5690-01	12.6983	TCGA-B0-5690-11	7.56986
TCGA-A3-3322-01	12.0081
TCGA-A3-3323-01	13.1147				TCGA-B0-5691-01	13.0133	TCGA-B0-5691-11	13.4242
TCGA-A3-3324-01	13.9378
TCGA-A3-3325-01	13.6895				TCGA-B0-5694-01	12.6298	TCGA-B0-5694-11	11.9311
TCGA-A3-3326-01	11.0403
TCGA-A3-3328-01	10.6421				TCGA-B0-5696-01	13.9429	TCGA-B0-5696-11	9.74819
TCGA-A3-3329-01	13.1881
TCGA-A3-3331-01	12.8971				TCGA-B0-5697-01	11.8599	TCGA-B0-5697-11	10.7574
TCGA-A3-3335-01	16.0462
TCGA-A3-3343-01	13.4358				TCGA-B0-5699-01	12.0875	TCGA-B0-5699-11	11.3761
TCGA-A3-3346-01	17.5819
TCGA-A3-3347-01	17.1406				TCGA-B0-5701-01	12.3168	TCGA-B0-5701-11	14.2011
TCGA-A3-3349-01	12.7311
TCGA-A3-3351-01	13.0283				TCGA-B0-5703-01	12.2521	TCGA-B0-5703-11	10.1712
TCGA-A3-3352-01	13.2763
TCGA-A3-3357-01	11.5411				TCGA-B0-5705-01	10.4062	TCGA-B0-5705-11	11.1183
					TCGA-B0-5706-01	13.9935	TCGA-B0-5706-11	11.0901
TCGA-A3-3359-01	12.0175
TCGA-A3-3362-01	11.6253				TCGA-B0-5709-01	12.8798	TCGA-B0-5709-11	12.4354
TCGA-A3-3363-01	8.97441
TCGA-A3-3365-01	13.896				TCGA-B0-5711-01	13.4146	TCGA-B0-5711-11	10.8842
TCGA-A3-3367-01	12.7467
TCGA-A3-3370-01	13.2439				TCGA-B0-5712-01	12.6484	TCGA-B0-5712-11	13.0549
TCGA-A3-3372-01	13.1124
TCGA-A3-3373-01	13.7488				TCGA-B2-5636-01	11.5343	TCGA-B2-5636-11	9.40514
TCGA-A3-3374-01	12.2189
TCGA-A3-3376-01	12.556				TCGA-B2-5641-01	11.7694	TCGA-B2-5641-11	8.14466
TCGA-A3-3378-01	12.7149
TCGA-A3-3380-01	13.5888				TCGA-B8-4619-01	13.1641	TCGA-B8-4619-11	11.4184
TCGA-A3-3382-01	14.4331
TCGA-A3-3383-01	11.3685				TCGA-B8-4620-01	15.8729	TCGA-B8-4620-11	13.8215
TCGA-A3-3385-01	9.76321
					TCGA-B8-4622-01	12.6344	TCGA-B8-4622-11	10.9136
TCGA-A3-A6NI-01	12.8433				TCGA-B8-5549-01	13.5567	TCGA-B8-5549-11	13.3737
TCGA-A3-A6NJ-01	13.5511
TCGA-A3-A6NL-01	12.6287				TCGA-B8-5552-01	12.2497	TCGA-B8-5552-11	13.5929
TCGA-A3-A6NN-01	13.6808
TCGA-A3-A8CQ-01	13.1881				TCGA-CJ-5672-01	13.0746	TCGA-CJ-5672-11	12.2243
TCGA-A3-A8OU-01	12.6551
TCGA-A3-A8OV-01	10.1812				TCGA-CJ-5676-01	14.916	TCGA-CJ-5676-11	13.1877
TCGA-A3-A8OW-01	13.243
TCGA-A3-A8OX-01	13.1977				TCGA-CJ-5677-01	11.4752	TCGA-CJ-5677-11	10.8918
TCGA-AK-3425-01	13.8871
TCGA-AK-3426-01	14.1644				TCGA-CJ-5678-01	11.1561	TCGA-CJ-5678-11	9.60733
TCGA-AK-3427-01	9.10591
TCGA-AK-3428-01	13.6951				TCGA-CJ-5679-01	13.5059	TCGA-CJ-5679-11	11.4818
TCGA-AK-3429-01	10.7855
TCGA-AK-3431-01	14.3108				TCGA-CJ-5680-01	11.617	TCGA-CJ-5680-11	15.2425
TCGA-AK-3433-01	8.32193
TCGA-AK-3434-01	13.5113				TCGA-CJ-5681-01	11.8463	TCGA-CJ-5681-11	11.8025
TCGA-AK-3436-01	15.2457
TCGA-AK-3440-01	11.8313				TCGA-CJ-5689-01	14.3511	TCGA-CJ-5689-11	11.9954
TCGA-AK-3443-01	9.85487
TCGA-AK-3445-01	15.4246				TCGA-CJ-6030-01	14.1954	TCGA-CJ-6030-11	9.67596
TCGA-AK-3447-01	6.65821
TCGA-AK-3450-01	12.9652				TCGA-CJ-6033-01	15.1579	TCGA-CJ-6033-11	8.37504
TCGA-AK-3451-01	10.014
TCGA-AK-3453-01	9.66888				TCGA-CW-5580-01	13.9432	TCGA-CW-5580-11	13.5591
TCGA-AK-3454-01	14.1057
TCGA-AK-3455-01	11.796				TCGA-CW-5581-01	12.4223	TCGA-CW-5581-11	10.6573
TCGA-AK-3456-01	10.9894
TCGA-AK-3458-01	11.3309				TCGA-CW-5584-01	13.9158	TCGA-CW-5584-11	10.4919
TCGA-AK-3460-01	13.1701
TCGA-AK-3461-01	13.7493				TCGA-CW-5585-01	13.4303	TCGA-CW-5585-11	12.314
TCGA-AK-3465-01	11.1855
TCGA-AS-3777-01	11.9658				TCGA-CW-5587-01	11.2923	TCGA-CW-5587-11	8.52748
TCGA-AS-3778-01	14.0069
TCGA-B0-4688-01	17.0426				TCGA-CW-5589-01	13.2709	TCGA-CW-5589-11	10.7074
TCGA-B0-4690-01	17.2366
TCGA-B0-4691-01	13.8668				TCGA-CW-5591-01	11.196	TCGA-CW-5591-11	12.9256
TCGA-B0-4693-01	13.2806
TCGA-B0-4694-01	15.2613				TCGA-CW-6087-01	15.0959	TCGA-CW-6087-11	8.34873
TCGA-B0-4696-01	11.5382
TCGA-B0-4697-01	11.5675				TCGA-CW-6088-01	12.2952	TCGA-CW-6088-11	10.7117
TCGA-B0-4698-01	18.3877
TCGA-B0-4699-01	14.0457				TCGA-CW-6090-01	16.0735	TCGA-CW-6090-11	8.55459
					TCGA-CZ-4863-01	11.7194	TCGA-CZ-4863-11	11.1235
TCGA-B0-4701-01	13.2442
TCGA-B0-4703-01	15.2532				TCGA-CZ-4864-01	13.2142	TCGA-CZ-4864-11	12.6355
TCGA-B0-4706-01	12.0417
TCGA-B0-4707-01	15.0627				TCGA-CZ-4865-01	13.3519	TCGA-CZ-4865-11	11.3886
TCGA-B0-4710-01	12.7192
					TCGA-CZ-5451-01	13.5244	TCGA-CZ-5451-11	12.6434
TCGA-B0-4713-01	11.6193				TCGA-CZ-5452-01	11.933	TCGA-CZ-5452-11	11.9589
TCGA-B0-4714-01	10.5206
TCGA-B0-4718-01	13.3274				TCGA-CZ-5453-01	13.2059	TCGA-CZ-5453-11	13.0062
TCGA-B0-4810-01	13.826
TCGA-B0-4811-01	11.9311				TCGA-CZ-5454-01	15.1384	TCGA-CZ-5454-11	13.9314
TCGA-B0-4813-01	16.2877
TCGA-B0-4814-01	12.0821				TCGA-CZ-5455-01	13.6844	TCGA-CZ-5455-11	13.9143
TCGA-B0-4815-01	13.6652
TCGA-B0-4816-01	13.5461				TCGA-CZ-5456-01	17.5953	TCGA-CZ-5456-11	11.8846
TCGA-B0-4817-01	12.0851
TCGA-B0-4818-01	12.7731				TCGA-CZ-5457-01	12.5618	TCGA-CZ-5457-11	12.1
TCGA-B0-4819-01	13.6708
TCGA-B0-4821-01	15.668				TCGA-CZ-5458-01	12.5053	TCGA-CZ-5458-11	13.3596
TCGA-B0-4822-01	15.2464
TCGA-B0-4823-01	13.6121				TCGA-CZ-5461-01	13.2608	TCGA-CZ-5461-11	12.9376
TCGA-B0-4824-01	10.5915
TCGA-B0-4827-01	13.7703				TCGA-CZ-5462-01	12.211	TCGA-CZ-5462-11	8.77149
TCGA-B0-4828-01	11.9285
TCGA-B0-4833-01	11.5684				TCGA-CZ-5463-01	14.2973	TCGA-CZ-5463-11	12.1963
TCGA-B0-4834-01	11.8262
TCGA-B0-4836-01	16.4504				TCGA-CZ-5465-01	13.4172	TCGA-CZ-5465-11	10.8619
TCGA-B0-4837-01	14.5735
TCGA-B0-4838-01	12.0307				TCGA-CZ-5466-01	13.1607	TCGA-CZ-5466-11	12.3875
TCGA-B0-4839-01	12.8289
TCGA-B0-4841-01	13.5535				TCGA-CZ-5467-01	16.2603	TCGA-CZ-5467-11	14.9402
TCGA-B0-4842-01	10.3815
TCGA-B0-4843-01	13.5094				TCGA-CZ-5468-01	17.7349	TCGA-CZ-5468-11	11.4548
TCGA-B0-4844-01	14.2549
TCGA-B0-4845-01	12.236				TCGA-CZ-5469-01	12.6497	TCGA-CZ-5469-11	12.5331
TCGA-B0-4846-01	11.69
TCGA-B0-4847-01	9.9263				TCGA-CZ-5470-01	12.0701	TCGA-CZ-5470-11	11.0654
TCGA-B0-4848-01	12.0526
TCGA-B0-4849-01	14.6007				TCGA-CZ-5982-01	13.3622	TCGA-CZ-5982-11	8.76155
TCGA-B0-4852-01	13.7193
TCGA-B0-4945-01	13.224				TCGA-CZ-5984-01	13.875	TCGA-CZ-5984-11	12.1427
TCGA-B0-5075-01	10.6348
TCGA-B0-5077-01	13.0793				TCGA-CZ-5985-01	13.3773	TCGA-CZ-5985-11	11.7826
TCGA-B0-5080-01	14.9997
TCGA-B0-5081-01	14.7652				TCGA-CZ-5986-01	14.8523	TCGA-CZ-5986-11	10.5584
TCGA-B0-5083-01	12.2456
TCGA-B0-5084-01	12.9454				TCGA-CZ-5987-01	13.3526	TCGA-CZ-5987-11	13.4426
TCGA-B0-5085-01	12.8961
TCGA-B0-5088-01	15.0559				TCGA-CZ-5988-01	15.1643	TCGA-CZ-5988-11	10.2396
TCGA-B0-5092-01	13.2522
TCGA-B0-5094-01	15.0432				TCGA-CZ-5989-01	10.7887	TCGA-CZ-5989-11	11.0775
TCGA-B0-5095-01	13.7504
TCGA-B0-5096-01	14.7379
TCGA-B0-5097-01	16.8526
TCGA-B0-5098-01	13.1785
TCGA-B0-5099-01	15.1771
TCGA-B0-5100-01	13.2783
TCGA-B0-5102-01	12.9317
TCGA-B0-5104-01	11.1799
TCGA-B0-5106-01	14.3755
TCGA-B0-5107-01	7.59991
TCGA-B0-5108-01	17.0201
TCGA-B0-5109-01	14.4265
TCGA-B0-5110-01	15.2434
TCGA-B0-5113-01	14.18
TCGA-B0-5115-01	13.8676
TCGA-B0-5116-01	12.1453
TCGA-B0-5117-01	9.62388
TCGA-B0-5119-01	10.7305
TCGA-B0-5120-01	14.5503
TCGA-B0-5121-01	12.8068
TCGA-B0-5399-01	11.9989
TCGA-B0-5400-01	13.8102
TCGA-B0-5692-01	12.129
TCGA-B0-5693-01	14.2742
TCGA-B0-5695-01	11.8467
TCGA-B0-5698-01	15.3205
TCGA-B0-5700-01	14.226
TCGA-B0-5702-01	10.6402
TCGA-B0-5707-01	10.6618
TCGA-B0-5710-01	15.7162
TCGA-B0-5713-01	12.1335
TCGA-B0-5812-01	14.1057
TCGA-B2-3923-01	8.85175
TCGA-B2-3923-01_Rep272	7.74819
TCGA-B2-3923-01_Rep358	8.50779
TCGA-B2-3924-01	9.86109
TCGA-B2-3924-01_Rep331	11.9473
TCGA-B2-3924-01_Rep373	10.5812
TCGA-B2-4098-01	11.4727
TCGA-B2-4099-01	10.8711
TCGA-B2-4101-01	13.6137
TCGA-B2-4102-01	9.87344
TCGA-B2-5633-01	11.3337
TCGA-B2-5633-01_Rep313	11.4009
TCGA-B2-5633-01_Rep94	12.0577
TCGA-B2-5635-01	12.7453
TCGA-B2-5635-01_Rep482	11.8533
TCGA-B2-5635-01_Rep526	10.6821
TCGA-B2-5639-01	9.81858
TCGA-B2-A4SR-01	13.1766
TCGA-B4-5377-01	14.0451
TCGA-B4-5378-01	15.8256
TCGA-B4-5832-01	11.2871
TCGA-B4-5834-01	15.0607
TCGA-B4-5835-01	10.8948
TCGA-B4-5836-01	12.8158
TCGA-B4-5838-01	13.0009
TCGA-B4-5843-01	13.8628
TCGA-B4-5844-01	13.3625
TCGA-B8-4143-01	12.9998
TCGA-B8-4146-01	11.168
TCGA-B8-4148-01	12.1202
TCGA-B8-4151-01	11.0532
TCGA-B8-4153-01	12.2279
TCGA-B8-4154-01	10.9418
TCGA-B8-4621-01	11.375
TCGA-B8-5158-01	16.1164
TCGA-B8-5159-01	12.4099
TCGA-B8-5162-01	15.521
TCGA-B8-5163-01	15.3208
TCGA-B8-5164-01	11.0914
TCGA-B8-5165-01	14.1994
TCGA-B8-5545-01	13.3741
TCGA-B8-5546-01	8.56224
TCGA-B8-5550-01	13.8104
TCGA-B8-5551-01	13.7469
TCGA-B8-5553-01	13.0995
TCGA-B8-A54D-01	11.4762
TCGA-B8-A54E-01	9.15228
TCGA-B8-A54F-01	13.8867
TCGA-B8-A54G-01	11.4959
TCGA-B8-A54H-01	11.4939
TCGA-B8-A54I-01	16.0713
TCGA-B8-A54J-01	13.379
TCGA-B8-A54K-01	11.7207
TCGA-B8-A7U6-01	16.0636
TCGA-B8-A8YJ-01	17.3404
TCGA-BP-4158-01	12.3753
TCGA-BP-4159-01	13.0836
TCGA-BP-4160-01	13.9306
TCGA-BP-4161-01	13.4979
TCGA-BP-4162-01	14.1471
TCGA-BP-4163-01	9.86109
TCGA-BP-4164-01	13.0152
TCGA-BP-4165-01	12.1128
TCGA-BP-4166-01	13.9252
TCGA-BP-4167-01	14.2636
TCGA-BP-4169-01	15.44
TCGA-BP-4170-01	13.605
TCGA-BP-4173-01	15.3947
TCGA-BP-4174-01	14.2843
TCGA-BP-4176-01	17.1253
TCGA-BP-4177-01	13.6855
TCGA-BP-4325-01	11.1176
TCGA-BP-4326-01	17.527
TCGA-BP-4327-01	14.4866
TCGA-BP-4329-01	11.7419
TCGA-BP-4330-01	12.2294
TCGA-BP-4331-01	13.9126
TCGA-BP-4332-01	12.3829
TCGA-BP-4334-01	9.86882
TCGA-BP-4335-01	13.1746
TCGA-BP-4337-01	13.4954
TCGA-BP-4338-01	17.1973
TCGA-BP-4340-01	13.0324
TCGA-BP-4341-01	13.7015
TCGA-BP-4342-01	16.005
TCGA-BP-4343-01	15.492
TCGA-BP-4344-01	12.9001
TCGA-BP-4345-01	14.8607
TCGA-BP-4346-01	11.8082
TCGA-BP-4347-01	13.5566
TCGA-BP-4349-01	14.1639
TCGA-BP-4351-01	14.2728
TCGA-BP-4352-01	14.9665
TCGA-BP-4353-01	15.3707
TCGA-BP-4354-01	17.9966
TCGA-BP-4355-01	13.7367
TCGA-BP-4756-01	10.2609
TCGA-BP-4758-01	14.2351
TCGA-BP-4759-01	13.655
TCGA-BP-4760-01	13.6311
TCGA-BP-4761-01	14.7378
TCGA-BP-4762-01	12.3869
TCGA-BP-4763-01	13.3092
TCGA-BP-4765-01	15.0963
TCGA-BP-4766-01	13.246
TCGA-BP-4768-01	12.2886
TCGA-BP-4769-01	12.5051
TCGA-BP-4770-01	15.7145
TCGA-BP-4771-01	12.9449
TCGA-BP-4774-01	14.0276
TCGA-BP-4775-01	14.3807
TCGA-BP-4776-01	13.4144
TCGA-BP-4777-01	13.8757
TCGA-BP-4781-01	14.4121
TCGA-BP-4782-01	13.5338
TCGA-BP-4784-01	13.0493
TCGA-BP-4787-01	15.6196
TCGA-BP-4789-01	14.1829
TCGA-BP-4790-01	13.0624
TCGA-BP-4795-01	11.6764
TCGA-BP-4797-01	14.1529
TCGA-BP-4798-01	12.224
TCGA-BP-4799-01	16.9887
TCGA-BP-4801-01	12.9867
TCGA-BP-4803-01	14.1485
TCGA-BP-4804-01	14.4404
TCGA-BP-4807-01	13.509
TCGA-BP-4959-01	13.8583
TCGA-BP-4960-01	16.6935
TCGA-BP-4961-01	15.2982
TCGA-BP-4962-01	13.7535
TCGA-BP-4963-01	14.0383
TCGA-BP-4964-01	13.3902
TCGA-BP-4965-01	13.4058
TCGA-BP-4967-01	16.1507
TCGA-BP-4968-01	14.6004
TCGA-BP-4969-01	11.9163
TCGA-BP-4970-01	13.5558
TCGA-BP-4971-01	12.9476
TCGA-BP-4972-01	13.8238
TCGA-BP-4973-01	14.0435
TCGA-BP-4974-01	15.2016
TCGA-BP-4975-01	13.7638
TCGA-BP-4976-01	12.5539
TCGA-BP-4977-01	13.213
TCGA-BP-4981-01	12.5302
TCGA-BP-4982-01	14.6659
TCGA-BP-4983-01	15.8342
TCGA-BP-4985-01	14.1435
TCGA-BP-4986-01	17.5319
TCGA-BP-4987-01	11.592
TCGA-BP-4989-01	13.8374
TCGA-BP-4991-01	14.5035
TCGA-BP-4992-01	14.4265
TCGA-BP-4993-01	15.1657
TCGA-BP-4994-01	11.9318
TCGA-BP-4995-01	12.5231
TCGA-BP-4998-01	13.829
TCGA-BP-4999-01	13.989
TCGA-BP-5000-01	14.3158
TCGA-BP-5001-01	11.8416
TCGA-BP-5004-01	15.8408
TCGA-BP-5006-01	14.6366
TCGA-BP-5007-01	12.8467
TCGA-BP-5008-01	16.0907
TCGA-BP-5009-01	13.9431
TCGA-BP-5010-01	13.0593
TCGA-BP-5168-01	14.7745
TCGA-BP-5169-01	15.7469
TCGA-BP-5170-01	15.6073
TCGA-BP-5173-01	13.0956
TCGA-BP-5174-01	10.8727
TCGA-BP-5175-01	13.7814
TCGA-BP-5176-01	11.8325
TCGA-BP-5177-01	12.9839
TCGA-BP-5178-01	16.6139
TCGA-BP-5180-01	14.5275
TCGA-BP-5181-01	13.2321
TCGA-BP-5182-01	13.9679
TCGA-BP-5183-01	10.2912
TCGA-BP-5184-01	13.7441
TCGA-BP-5185-01	11.9883
TCGA-BP-5186-01	12.6893
TCGA-BP-5187-01	14.2163
TCGA-BP-5189-01	16.1399
TCGA-BP-5190-01	11.4014
TCGA-BP-5191-01	12.263
TCGA-BP-5192-01	11.3482
TCGA-BP-5194-01	13.1532
TCGA-BP-5195-01	15.353
TCGA-BP-5196-01	14.5434
TCGA-BP-5198-01	17.3599
TCGA-BP-5199-01	13.6604
TCGA-BP-5200-01	16.3849
TCGA-BP-5201-01	14.4229
TCGA-BP-5202-01	13.9218
TCGA-CJ-4634-01	14.0581
TCGA-CJ-4635-01	14.5949
TCGA-CJ-4636-01	13.097
TCGA-CJ-4637-01	12.3993
TCGA-CJ-4638-01	8.79766
TCGA-CJ-4639-01	11.9546
TCGA-CJ-4640-01	11.8849
TCGA-CJ-4641-01	13.7016
TCGA-CJ-4642-01	9.10329
TCGA-CJ-4643-01	12.3829
TCGA-CJ-4644-01	11.9226
TCGA-CJ-4868-01	17.0496
TCGA-CJ-4869-01	14.2836
TCGA-CJ-4870-01	13.4193
TCGA-CJ-4871-01	14.8971
TCGA-CJ-4872-01	14.0371
TCGA-CJ-4873-01	11.1517
TCGA-CJ-4874-01	12.5948
TCGA-CJ-4875-01	11.5689
TCGA-CJ-4876-01	14.5372
TCGA-CJ-4878-01	13.6638
TCGA-CJ-4881-01	12.9837
TCGA-CJ-4882-01	13.8087
TCGA-CJ-4884-01	13.2671
TCGA-CJ-4885-01	13.0512
TCGA-CJ-4886-01	13.7769
TCGA-CJ-4887-01	14.0141
TCGA-CJ-4888-01	14.1074
TCGA-CJ-4889-01	13.4594
TCGA-CJ-4890-01	14.7265
TCGA-CJ-4891-01	13.8705
TCGA-CJ-4892-01	12.7147
TCGA-CJ-4893-01	12.1655
TCGA-CJ-4894-01	11.3788
TCGA-CJ-4895-01	13.5672
TCGA-CJ-4897-01	12.9926
TCGA-CJ-4899-01	15.2129
TCGA-CJ-4900-01	15.0536
TCGA-CJ-4901-01	16.6543
TCGA-CJ-4902-01	15.5602
TCGA-CJ-4903-01	15.957
TCGA-CJ-4904-01	14.8424
TCGA-CJ-4905-01	13.1534
TCGA-CJ-4907-01	14.8283
TCGA-CJ-4908-01	15.2962
TCGA-CJ-4912-01	16.9607
TCGA-CJ-4916-01	13.1368
TCGA-CJ-4918-01	14.6812
TCGA-CJ-4920-01	15.0761
TCGA-CJ-5671-01	15.7241
TCGA-CJ-5675-01	10.3129
TCGA-CJ-5682-01	12.1991
TCGA-CJ-5683-01	12.7723
TCGA-CJ-5684-01	11.599
TCGA-CJ-5686-01	14.2033
TCGA-CJ-6027-01	16.7815
TCGA-CJ-6028-01	15.8245
TCGA-CJ-6031-01	13.6702
TCGA-CJ-6032-01	12.991
TCGA-CW-5583-01	13.2549
TCGA-CW-5588-01	13.6783
TCGA-CW-5590-01	14.359
TCGA-CW-6093-01	13.0942
TCGA-CW-6097-01	13.0923
TCGA-CZ-4853-01	12.3509
TCGA-CZ-4854-01	13.7286
TCGA-CZ-4856-01	12.3278
TCGA-CZ-4857-01	13.3209
TCGA-CZ-4858-01	14.374
TCGA-CZ-4859-01	12.3498
TCGA-CZ-4860-01	19.3904
TCGA-CZ-4861-01	15.1748
TCGA-CZ-4862-01	12.5031
TCGA-CZ-4866-01	10.9129
TCGA-CZ-5459-01	13.0324
TCGA-CZ-5460-01	13.7782
TCGA-CZ-5464-01	12.0307
TCGA-DV-5565-01	15.8342
TCGA-DV-5566-01	12.4653
TCGA-DV-5567-01	14.5316
TCGA-DV-5568-01	15.6503
TCGA-DV-5569-01	13.9402
TCGA-DV-5573-01	12.7632
TCGA-DV-5574-01	15.8362
TCGA-DV-5575-01	14.7676
TCGA-DV-5576-01	13.4477
TCGA-DV-A4VX-01	11.3382
TCGA-DV-A4VZ-01	11.2234
TCGA-DV-A4W0-01	15.7198
TCGA-DV-A4W0-05	11.7469
TCGA-EU-5904-01	16.3494
TCGA-EU-5905-01	12.6106
TCGA-EU-5906-01	13.9188
TCGA-EU-5907-01	13.4146
TCGA-G6-A5PC-01	9.94691
TCGA-G6-A8L6-01	12.2912
TCGA-G6-A8L7-01	10.9801
TCGA-G6-A8L8-01	12.8961
TCGA-GK-A6C7-01	13.665
TCGA-MM-A563-01	13.9102
TCGA-MM-A564-01	10.4315
TCGA-MM-A84U-01	11.6443
TCGA-MW-A4EC-01	11.5831
TCGA-T7-A92I-01	10.7616

## Sheet: Sheet2
Tag	ENSG00000106366	Tag	ENSG00000106366
TCGA-A3-3358-01	13.2012	TCGA-A3-3358-11	9.90989
TCGA-A3-3387-01	13.6241	TCGA-A3-3387-11	11.0681
TCGA-B0-4700-01	16.0967	TCGA-B0-4700-11	12.2776
TCGA-B0-4712-01	18.0272	TCGA-B0-4712-11	8.98584
TCGA-B0-5402-01	15.3032	TCGA-B0-5402-11	13.9654
TCGA-B0-5690-01	12.6983	TCGA-B0-5690-11	7.56986
TCGA-B0-5691-01	13.0133	TCGA-B0-5691-11	13.4242
TCGA-B0-5694-01	12.6298	TCGA-B0-5694-11	11.9311
TCGA-B0-5696-01	13.9429	TCGA-B0-5696-11	9.74819
TCGA-B0-5697-01	11.8599	TCGA-B0-5697-11	10.7574
TCGA-B0-5699-01	12.0875	TCGA-B0-5699-11	11.3761
TCGA-B0-5701-01	12.3168	TCGA-B0-5701-11	14.2011
TCGA-B0-5703-01	12.2521	TCGA-B0-5703-11	10.1712
TCGA-B0-5705-01	10.4062	TCGA-B0-5705-11	11.1183
TCGA-B0-5706-01	13.9935	TCGA-B0-5706-11	11.0901
TCGA-B0-5709-01	12.8798	TCGA-B0-5709-11	12.4354
TCGA-B0-5711-01	13.4146	TCGA-B0-5711-11	10.8842
TCGA-B0-5712-01	12.6484	TCGA-B0-5712-11	13.0549
TCGA-B2-5636-01	11.5343	TCGA-B2-5636-11	9.40514
TCGA-B2-5641-01	11.7694	TCGA-B2-5641-11	8.14466
TCGA-B8-4619-01	13.1641	TCGA-B8-4619-11	11.4184
TCGA-B8-4620-01	15.8729	TCGA-B8-4620-11	13.8215
TCGA-B8-4622-01	12.6344	TCGA-B8-4622-11	10.9136
TCGA-B8-5549-01	13.5567	TCGA-B8-5549-11	13.3737
TCGA-B8-5552-01	12.2497	TCGA-B8-5552-11	13.5929
TCGA-CJ-5672-01	13.0746	TCGA-CJ-5672-11	12.2243
TCGA-CJ-5676-01	14.916	TCGA-CJ-5676-11	13.1877
TCGA-CJ-5677-01	11.4752	TCGA-CJ-5677-11	10.8918
TCGA-CJ-5678-01	11.1561	TCGA-CJ-5678-11	9.60733
TCGA-CJ-5679-01	13.5059	TCGA-CJ-5679-11	11.4818
TCGA-CJ-5680-01	11.617	TCGA-CJ-5680-11	15.2425
TCGA-CJ-5681-01	11.8463	TCGA-CJ-5681-11	11.8025
TCGA-CJ-5689-01	14.3511	TCGA-CJ-5689-11	11.9954
TCGA-CJ-6030-01	14.1954	TCGA-CJ-6030-11	9.67596
TCGA-CJ-6033-01	15.1579	TCGA-CJ-6033-11	8.37504
TCGA-CW-5580-01	13.9432	TCGA-CW-5580-11	13.5591
TCGA-CW-5581-01	12.4223	TCGA-CW-5581-11	10.6573
TCGA-CW-5584-01	13.9158	TCGA-CW-5584-11	10.4919
TCGA-CW-5585-01	13.4303	TCGA-CW-5585-11	12.314
TCGA-CW-5587-01	11.2923	TCGA-CW-5587-11	8.52748
TCGA-CW-5589-01	13.2709	TCGA-CW-5589-11	10.7074
TCGA-CW-5591-01	11.196	TCGA-CW-5591-11	12.9256
TCGA-CW-6087-01	15.0959	TCGA-CW-6087-11	8.34873
TCGA-CW-6088-01	12.2952	TCGA-CW-6088-11	10.7117
TCGA-CW-6090-01	16.0735	TCGA-CW-6090-11	8.55459
TCGA-CZ-4863-01	11.7194	TCGA-CZ-4863-11	11.1235
TCGA-CZ-4864-01	13.2142	TCGA-CZ-4864-11	12.6355
TCGA-CZ-4865-01	13.3519	TCGA-CZ-4865-11	11.3886
TCGA-CZ-5451-01	13.5244	TCGA-CZ-5451-11	12.6434
TCGA-CZ-5452-01	11.933	TCGA-CZ-5452-11	11.9589
TCGA-CZ-5453-01	13.2059	TCGA-CZ-5453-11	13.0062
TCGA-CZ-5454-01	15.1384	TCGA-CZ-5454-11	13.9314
TCGA-CZ-5455-01	13.6844	TCGA-CZ-5455-11	13.9143
TCGA-CZ-5456-01	17.5953	TCGA-CZ-5456-11	11.8846
TCGA-CZ-5457-01	12.5618	TCGA-CZ-5457-11	12.1
TCGA-CZ-5458-01	12.5053	TCGA-CZ-5458-11	13.3596
TCGA-CZ-5461-01	13.2608	TCGA-CZ-5461-11	12.9376
TCGA-CZ-5462-01	12.211	TCGA-CZ-5462-11	8.77149
TCGA-CZ-5463-01	14.2973	TCGA-CZ-5463-11	12.1963
TCGA-CZ-5465-01	13.4172	TCGA-CZ-5465-11	10.8619
TCGA-CZ-5466-01	13.1607	TCGA-CZ-5466-11	12.3875
TCGA-CZ-5467-01	16.2603	TCGA-CZ-5467-11	14.9402
TCGA-CZ-5468-01	17.7349	TCGA-CZ-5468-11	11.4548
TCGA-CZ-5469-01	12.6497	TCGA-CZ-5469-11	12.5331
TCGA-CZ-5470-01	12.0701	TCGA-CZ-5470-11	11.0654
TCGA-CZ-5982-01	13.3622	TCGA-CZ-5982-11	8.76155
TCGA-CZ-5984-01	13.875	TCGA-CZ-5984-11	12.1427
TCGA-CZ-5985-01	13.3773	TCGA-CZ-5985-11	11.7826
TCGA-CZ-5986-01	14.8523	TCGA-CZ-5986-11	10.5584
TCGA-CZ-5987-01	13.3526	TCGA-CZ-5987-11	13.4426
TCGA-CZ-5988-01	15.1643	TCGA-CZ-5988-11	10.2396
TCGA-CZ-5989-01	10.7887	TCGA-CZ-5989-11	11.0775
