# Supplementary material for: Prediction and analysis of novel key genes ITGAX, LAPTM5, SERPINE1 in clear cell renal cell carcinoma through bioinformatics analysis
Source: PeerJ. 2021 Apr 20;9:e11272. doi: 10.7717/peerj.11272 (PMC8063882; doi:10.7717/peerj.11272)
Supplement: Supplemental Information 17 [file peerj-09-11272-s017.xlsx]

## Sheet: Sheet1
ITGAX				LAPTM5				SERPINE1
	kidney	CCRCC			kidney	CCRCC			kidney	CCRCC
1	-3.738	-2.99185		1	1.01485	3.77479		1	-2.82682	0.63512
2	-3.43563	-2.79048		2	1.96696	4.12827		2	-2.62923	1.03351
3	-3.18247	-2.34337		3	1.98415	4.24956		3	-2.5986	1.08268
4	-2.95321	-2.02891		4	2.03	4.26777		4	-2.48556	1.14856
5	-2.94186	-1.67124		5	2.17938	4.30563		5	-1.08651	1.23704
6	-2.9221	-1.34707		6	2.23522	4.65559		6	-0.83496	1.32851
7	-2.83976	-1.32548		7	2.25994	5.07029		7	-0.15832	1.35031
8	-2.80069	-1.23327		8	2.43753	5.12293		8	-0.00555	1.39586
9	-2.77259	-0.6559		9	2.48338	5.24326		9	0.06566	1.79517
10	-2.0205	-0.26888		10	2.75482	5.34316		10	0.29822	2.51563
